# Supplementary material for: Ethiopia National Food and Nutrition Survey to inform the Ethiopian National Food and Nutrition Strategy: a study protocol
Source: PubMed Central journal article supplement (PMC10151871; doi:10.1136/bmjopen-2022-067641), 2023-04-25

05944295500V8.0

# Elecsys Folate RBC



| REF         |  |  | SYSTEM                                                         |
|-------------|-----------------------------------------------------------------------------------|-----------------------------------------------------------------------------------|----------------------------------------------------------------|
| 05944295190 | 05944295500                                                                       | 100                                                                               | <b>cobas e 411</b><br><b>cobas e 601</b><br><b>cobas e 602</b> |

## English

### System information

For **cobas e 411** analyzer: test number 1210

For **cobas e 601** and **cobas e 602** analyzers: Application Code Number 272

### Intended use

This assay is used for the *in vitro* quantitative determination of folate in erythrocytes (red blood cells, RBC). The electrochemiluminescence binding assay is intended for use on the Elecsys and **cobas e** immunoassay analyzers.

### Summary

Folate belongs to the family of B-group vitamins composed of an aromatic pteridine ring linked through a methylene group to *p*-aminobenzoic acid and a glutamate residue. Folate (folic acid) is vital for normal cellular functions and plays an essential role in nucleic acid synthesis, methionine regeneration, shuttling and redox reactions of one-carbon units required for normal metabolism and regulation.<sup>1,2</sup>

The folate metabolism can be exemplified as a cycle, where folate facilitates the transfer of one-carbon units from one molecule to another required in various biochemical reactions: for example, tetrahydrofolate (THF) accepts a single carbon unit from serine, which is reduced in a number of steps to 5-methyltetrahydrofolate (5-MTHF). 5-MTHF gives its methyl group to homocysteine, which is - with involvement of methionine synthase and vitamin B12 - enzymatically converted to methionine. The resulting THF starts again the cycle of methyl group synthesis. From methionine, the methyl groups are transferred to *S*-adenosylmethionine (SAM).<sup>3</sup> SAM serves as a methyl group donor in several methylation reactions, like DNA, RNA and protein methylation.<sup>1</sup>

The methionine cycle is highly sensitive to folate deficiency: with a low folate status, the ability of the cell to re-methylate homocysteine is impaired and this results in increased homocysteine concentrations in plasma.<sup>2</sup>

Folate also plays an essential role in the synthesis of purine and pyrimidine precursors of nucleic acids. Altered distribution of methyl groups and impaired DNA synthesis play an essential role in the development of cancers. Abnormal folate status has also been linked with the development of diseases like cardiovascular diseases, neural tube defects, cleft lip and palate, late pregnancy complications, neurodegenerative and psychiatric disorders.<sup>1,2</sup>

Folate belongs to the group of essential vitamins, i.e. it cannot be synthesized by the human organism and therefore must be absorbed from diet. Primary sources of folates are green and leafy vegetables, sprouts, fruits, brewer's yeast and liver.<sup>1,2</sup>

Folate deficiency can be caused by decreased nutritional intake, poor absorption of ingested folate in the intestine or increased demand of folate, for example during physical activity or pregnancy. Deficiency of folate can also be a result of liver diseases or impaired folate metabolism due to genetic defects or drug interactions.<sup>2</sup>

A clinical manifestation of both folate and vitamin B12 deficiency is the so called megaloblastic (macrocytic) anemia: due to the affected DNA synthesis and cell maturation, especially involving the cells of erythropoiesis, the total count of erythrocytes is significantly reduced. The hemoglobin synthesis capacity however is normal, which leads to abnormally large erythrocyte precursors ("macrocytes" or "megaloblasts"), which have an elevated hemoglobin content ("hyperchromic anemia").<sup>3,4</sup>

Serum folate concentrations may be affected by recent folate intakes, whereas red blood cell (RBC) folate is a measure of the folate intake across the 90-120 days lifespan of erythrocytes. Thus, folate concentrations in RBC give a more accurate picture of a patient's underlying folate status than serum folate concentrations, and are considered by experts as the better measure for folate status.<sup>5</sup>

Because vitamin B12 and folate are closely interrelated in the cellular one-carbon unit metabolism, and also hematologic and clinical consequences of the two vitamin deficiency states might be similar, it is

advisable to determine both parameters simultaneously in patients with the relevant symptoms of vitamin deficiency.<sup>3,4</sup>

### Test principle

Competition principle. Total duration of assay: 27 minutes.

Whole blood treated with anticoagulants (heparin or EDTA) is mixed with ascorbic acid solution and incubated for approximately 90 minutes at 20-25 °C. Lysis of the erythrocytes takes place, with liberation and stabilization of the intracellular folate. The resulting hemolysate sample is then used for subsequent measurement.

- 1st incubation: By incubating 25 µL of hemolysate sample with the folate pretreatment reagents 1 and 2, bound folate is released from endogenous folate binding proteins.
- 2nd incubation: By incubating the pretreated sample with the ruthenium labeled folate binding protein, a folate complex is formed, the amount of which is dependent upon the analyte concentration in the sample.
- 3rd incubation: After addition of streptavidin-coated microparticles and folate labeled with biotin, the unbound sites of the ruthenium labeled folate binding protein-folate biotin complex. The entire complex becomes bound to the solid phase via interaction of biotin and streptavidin.
- The reaction mixture is aspirated into the measuring cell where the microparticles are magnetically captured onto the surface of the electrode. Unbound substances are then removed with ProCell/ProCell M. Application of a voltage to the electrode then induces chemiluminescent emission which is measured by a photomultiplier.
- Results are determined via a calibration curve which is instrument-specifically generated by 2-point calibration and a master curve provided via the reagent barcode or e-barcode.

### Reagents - working solutions

The reagent rackpack (M, R1, R2) is labeled as RBC-FOL.

PT1 Pretreatment reagent 1 (white cap), 1 bottle, 4 mL:

Sodium 2-mercaptoethanesulfonate (MESNA) 40 g/L, pH 5.5.

PT2 Pretreatment reagent 2 (gray cap), 1 bottle, 5 mL:

Sodium hydroxide 25 g/L.

M Streptavidin-coated microparticles (transparent cap), 1 bottle, 6.5 mL:

Streptavidin-coated microparticles 0.72 mg/mL; preservative.

R1 Folate binding protein-Ru(bpy)<sub>3</sub><sup>2+</sup> (gray cap), 1 bottle, 9 mL:

Ruthenium labeled folate binding protein 75 µg/L; human serum albumin (stabilizer); borate/phosphate/citrate buffer 70 mmol/L, pH 5.5; preservative.

R2 Folate-biotin (black cap), 1 bottle, 8 mL:

Biotinylated folate 17 µg/L; biotin 120 µg/L; human serum albumin (stabilizer); borate buffer 100 mmol/L, pH 9.0; preservative.

### Precautions and warnings

For *in vitro* diagnostic use.

Exercise the normal precautions required for handling all laboratory reagents.

Disposal of all waste material should be in accordance with local guidelines. Safety data sheet available for professional user on request.

This kit contains components classified as follows in accordance with the Regulation (EC) No. 1272/2008:

2-methyl-2H-isothiazol-3-one hydrochloride

EUH 208 May produce an allergic reaction.

05944295500V8.0

# Elecsys Folate RBC


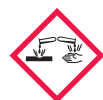

**Danger**

H290 May be corrosive to metals.

H314 Causes severe skin burns and eye damage.

**Prevention:**

P280 Wear protective gloves/ protective clothing/ eye protection/ face protection.

**Response:**

P301 + P330 IF SWALLOWED: Rinse mouth. Do NOT induce vomiting.  
+ P331

P303 + P361 IF ON SKIN (or hair): Take off immediately all contaminated clothing. Rinse skin with water.

P304 + P340 IF INHALED: Remove person to fresh air and keep comfortable for breathing.  
+ P310 Immediately call a POISON CENTER/ doctor.

P305 + P351 IF IN EYES: Rinse cautiously with water for several minutes. Remove contact lenses, if present and easy to do.  
+ P338 Continue rinsing. Immediately call a POISON CENTER/ doctor.

P390 Absorb spillage to prevent material damage.

Product safety labeling follows EU GHS guidance.

Contact phone: all countries: +49-621-7590

All human material should be considered potentially infectious. All products derived from human blood are prepared exclusively from the blood of donors tested individually and shown to be free from HBsAg and antibodies to HCV and HIV. The testing methods used assays approved by the FDA or cleared in compliance with the European Directive 98/79/EC, Annex II, List A.

However, as no testing method can rule out the potential risk of infection with absolute certainty, the material should be handled with the same level of care as a patient specimen. In the event of exposure, the directives of the responsible health authorities should be followed.<sup>6,7</sup>

Avoid foam formation in all reagents and sample types (specimens, calibrators and controls).

**Reagent handling**

The reagents in the kit have been assembled into a ready-for-use unit that cannot be separated.

All information required for correct operation is read in from the respective reagent barcodes.

**Storage and stability**

Store at 2-8 °C.

Do not freeze.

Store the Elecsys reagent kit **upright** in order to ensure complete availability of the microparticles during automatic mixing prior to use.

| Stability:              |                                  |
|-------------------------|----------------------------------|
| unopened at 2-8 °C      | up to the stated expiration date |
| after opening at 2-8 °C | 8 weeks                          |
| on the analyzers        | 2 weeks                          |

**Specimen collection and preparation**

Only the specimens listed below were tested and found acceptable.

Hemolysate prepared from whole blood treated with anticoagulants (Na-heparin or K<sub>3</sub>-EDTA).

- *For the determination of folate in RBC:* Determine hematocrit in whole blood samples and record the value.
- *Preparation of the hemolysate sample*  
Mix 3.0 mL of Folate RBC Hemolyzing Reagent (ascorbic acid solution, 0.2 %) and 100 µL of well-mixed whole blood, avoiding foam formation. Incubate with closed caps for 90 ± 15 minutes at 20-25 °C.

**Stability:**

Whole blood: 2 hours at 20-25 °C<sup>8</sup>, 24 hours at 2-8 °C, 1 month at -20 °C (± 5 °C) (only EDTA-blood).

Hemolysate sample: 1 month at -20 °C (± 5 °C), freeze only once.

The sample types listed were tested with a selection of sample collection tubes that were commercially available at the time of testing, i.e. not all available tubes of all manufacturers were tested. Sample collection systems from various manufacturers may contain differing materials which could affect the test results in some cases. When processing samples in primary tubes (sample collection systems), follow the instructions of the tube manufacturer.

Samples should not subsequently be altered with additives (biocides, anti-oxidants or substances possibly changing the pH of the sample) in order to avoid erroneous folate recovery.

Ensure the samples, calibrators and controls are at 20-25 °C prior to measurement.

Due to possible evaporation effects, samples, calibrators and controls on the analyzers should be analyzed/measured within 2 hours.

If measurements cannot be carried out within 2 hours please store the hemolysate sample at -20 °C (± 5 °C).

**Materials provided**

See "Reagents – working solutions" section for reagents.

**Materials required (but not provided)**

- [REF] 05944309190, Folate RBC CalSet, for 4 x 1.0 mL
- [REF] 05944317190, Folate RBC Hemolyzing Reagent kit for 4 x 200 mL, contains ascorbic acid
- General laboratory equipment

▪ **cobas e analyzer**

Additional materials for the **cobas e 411 analyzer:**

- [REF] 11662988122, ProCell, 6 x 380 mL system buffer
- [REF] 11662970122, CleanCell, 6 x 380 mL measuring cell cleaning solution
- [REF] 11930346122, Elecsys SysWash, 1 x 500 mL washwater additive
- [REF] 11933159001, Adapter for SysClean
- [REF] 11706802001, AssayCup, 60 x 60 reaction cups
- [REF] 11706799001, AssayTip, 30 x 120 pipette tips
- [REF] 11800507001, Clean-Liner

Additional materials for **cobas e 601** and **cobas e 602** analyzers:

- [REF] 04880340190, ProCell M, 2 x 2 L system buffer
- [REF] 04880293190, CleanCell M, 2 x 2 L measuring cell cleaning solution
- [REF] 03023141001, PC/CC-Cups, 12 cups to prewarm ProCell M and CleanCell M before use
- [REF] 03005712190, ProbeWash M, 12 x 70 mL cleaning solution for run finalization and rinsing during reagent change
- [REF] 03004899190, PreClean M, 5 x 600 mL detection cleaning solution
- [REF] 12102137001, AssayTip/AssayCup, 48 magazines x 84 reaction cups or pipette tips, waste bags
- [REF] 03023150001, WasteLiner, waste bags
- [REF] 03027651001, SysClean Adapter M

Additional materials for all analyzers:

- [REF] 11298500316, ISE Cleaning Solution/Elecsys SysClean, 5 x 100 mL system cleaning solution



05944295500V8.0

# Elecsys Folate RBC



error of  $\leq 30\%$ . It has been determined using low concentration folate samples.

## Dilution

Hemolysate samples with folate concentrations above the measuring range can be diluted manually with Elecsys Folate RBC Hemolyzing Reagent (ascorbic acid solution, 0.2%). The recommended dilution is 1:2. The concentration of the diluted sample must be  $> 265$  ng/mL or  $> 602$  nmol/L. After manual dilution, multiply the results by the dilution factor 2.

## Expected values

The values shown below were measured on samples from an apparently healthy population, using the Elecsys Folate III/RBC application. The values can be applied for the Elecsys Folate RBC assay on all Elecsys and **cobas e** analyzers. The calculation is based on 290 sera (96 men, 194 women) from an European population. The age range was between 18 and 65 years. Pregnant or lactating women were excluded. The reference population was selected according to normal homocysteine values. The following values were obtained:

| Whole blood folate (from hemolysate samples) |     |        |       |                                                  |         |
|----------------------------------------------|-----|--------|-------|--------------------------------------------------|---------|
|                                              | N   | Median |       | 2.5 <sup>th</sup> -97.5 <sup>th</sup> percentile |         |
|                                              |     | nmol/L | ng/mL | nmol/L                                           | ng/mL   |
| Europe                                       | 290 | 673    | 296   | 481-1212                                         | 212-534 |

The measured hematocrit value in this study showed a range from 37.1-46.1%.

| RBC folate (folate in erythrocyte fraction) |     |        |       |                                                  |          |
|---------------------------------------------|-----|--------|-------|--------------------------------------------------|----------|
|                                             | N   | Median |       | 2.5 <sup>th</sup> -97.5 <sup>th</sup> percentile |          |
|                                             |     | nmol/L | ng/mL | nmol/L                                           | ng/mL    |
| Europe                                      | 290 | 1657   | 730   | 1187-2854                                        | 523-1257 |

If pathologically low hematocrit values are considered for calculation of RBC folate in the erythrocyte fraction, elevated RBC folate concentrations may be observed. No medical conclusion should be based on the calculation considering hematocrit values in such cases. Instead, whole blood folate results (from hemolysate samples) and suitable expected values may be used.

Each laboratory should investigate the transferability of the expected values to its own patient population and if necessary determine its own reference ranges.

## Specific performance data

Representative performance data on the analyzers are given below. Results obtained in individual laboratories may differ.

## Precision

Precision was determined using Elecsys reagents and hemolysate samples in a protocol (EP5-A2) of the CLSI (Clinical and Laboratory Standards Institute): 2 runs per day in duplicate each for 21 days ( $n = 84$ ). Results are given as whole blood folate (from hemolysate sample). The following results were obtained:

| cobas e 411 analyzer |        |       |               |       |     |                        |       |      |
|----------------------|--------|-------|---------------|-------|-----|------------------------|-------|------|
| Sample               | Mean   |       | Repeatability |       |     | Intermediate precision |       |      |
|                      | SD     |       | CV            |       | SD  |                        | CV    |      |
|                      | nmol/L | ng/mL | nmol/L        | ng/mL | %   | nmol/L                 | ng/mL | %    |
| HL <sup>a)</sup> 1   | 154    | 68.0  | 11.7          | 5.17  | 7.6 | 21.9                   | 9.65  | 14.2 |
| HL 2                 | 352    | 155   | 17.5          | 7.73  | 5.0 | 27.7                   | 12.2  | 7.9  |
| HL 3                 | 618    | 272   | 25.4          | 11.2  | 4.1 | 38.4                   | 16.9  | 6.2  |
| HL 4                 | 1195   | 527   | 38.8          | 17.1  | 3.3 | 56.3                   | 24.8  | 4.7  |

a) HL = Hemolysate

| cobas e 601 and cobas e 602 analyzers |        |       |               |       |     |                        |       |      |
|---------------------------------------|--------|-------|---------------|-------|-----|------------------------|-------|------|
| Sample                                | Mean   |       | Repeatability |       |     | Intermediate precision |       |      |
|                                       | SD     |       | CV            |       | SD  |                        | CV    |      |
|                                       | nmol/L | ng/mL | nmol/L        | ng/mL | %   | nmol/L                 | ng/mL | %    |
| HL 1                                  | 138    | 61.0  | 12.1          | 5.31  | 8.8 | 14.3                   | 6.32  | 10.4 |
| HL 2                                  | 434    | 191   | 26.1          | 11.5  | 6.0 | 28.4                   | 12.5  | 6.5  |
| HL 3                                  | 586    | 258   | 32.0          | 14.1  | 5.5 | 34.3                   | 15.1  | 5.9  |
| HL 4                                  | 1317   | 580   | 29.1          | 12.8  | 2.2 | 44.7                   | 19.7  | 3.4  |

## Method comparison

a) A comparison of the Elecsys Folate RBC assay (calibrated with Folate RBC CalSet; y) and the Elecsys Folate III/RBC application (calibrated with Folate III CalSet; x) using hemolyzed clinical samples gave the following correlations (ng/mL). Results are given as whole blood folate (from hemolysate sample).

Number of samples measured: 187

Passing/Bablok<sup>9</sup> Linear regression

$$y = 1.02x - 14.1 \quad y = 1.00x - 12.0$$

$$r = 0.869 \quad r = 0.985$$

The sample concentrations were between 151 and 551 ng/mL (343 and 1251 nmol/L).

b) A comparison of the Elecsys Folate RBC assay on the MODULAR ANALYTICS E170 analyzer (y) with the Elecsys Folate RBC assay on the Elecsys 2010 analyzer (x) (both tests have been calibrated with Folate RBC CalSet) using hemolyzed clinical samples gave the following correlations (ng/mL). Results are given as whole blood folate (from hemolysate sample).

Number of samples measured: 187

Passing/Bablok Linear regression

$$y = 1.04x + 1.94 \quad y = 1.02x + 8.07$$

$$r = 0.814 \quad r = 0.970$$

The sample concentrations were between 137 and 557 ng/mL (311 and 1264 nmol/L).

## References

- Nazki FH, Sameer AS, Ganaie BA. Folate: Metabolism, genes, polymorphisms and the associated diseases. *Gene* 2014;533(1):11-20.
- Scaglione F, Panzavolta G. Folate, folic acid and 5-methyltetrahydrofolate are not the same thing. *Xenobiotica* 2014;44(5):480-488.
- Reynolds EH. The neurology of folic acid deficiency. *Handb Clin Neurol* 2014;120:927-43.
- Wick M, Pinggera W, Lehmann P. *Clinical Aspects and Laboratory. Iron metabolism, Anemias*. Springer Verlag, Wien, New York, 6th edition 2011:41-42.
- Yetley EA, Pfeiffer CM, Phinney KW, et al. Biomarkers of folate status in NHANES: a roundtable summary. *Am J Clin Nutr* 2011;94(1):303S-312S.
- Occupational Safety and Health Standards: Bloodborne pathogens. (29 CFR Part 1910.1030). Fed. Register.
- Directive 2000/54/EC of the European Parliament and Council of 18 September 2000 on the protection of workers from risks related to exposure to biological agents at work.
- Eijsden M, van der Wal MF, Hornstra G, et al. Can whole blood samples be stored over 24 hours without compromising stability of C-Reactive Protein, Retinol, Ferritin, Folic Acid and Fatty Acids in Epidemiology Research? *Clin Chem* 2005;51(1):230-232.
- Bablok W, Passing H, Bender R, et al. A general regression procedure for method transformation. Application of linear regression procedures for method comparison studies in clinical chemistry, Part III. *J Clin Chem Clin Biochem* 1988 Nov;26(11):783-790.

05944295500V8.0

# Elecsys Folate RBC

**cobas**<sup>®</sup>

For further information, please refer to the appropriate operator's manual for the analyzer concerned, the respective application sheets, the product information and the Method Sheets of all necessary components (if available in your country).

A point (period/stop) is always used in this Method Sheet as the decimal separator to mark the border between the integral and the fractional parts of a decimal numeral. Separators for thousands are not used.

## Symbols

Roche Diagnostics uses the following symbols and signs in addition to those listed in the ISO 15223-1 standard (for USA: see [dialog. Roche.com](http://dialog. Roche.com) for definition of symbols used):

|                                                                                   |                                                     |
|-----------------------------------------------------------------------------------|-----------------------------------------------------|
|  | Contents of kit                                     |
|  | Analyzers/Instruments on which reagents can be used |
|  | Reagent                                             |
|  | Calibrator                                          |
|  | Volume after reconstitution or mixing               |
|  | Global Trade Item Number                            |

COBAS, COBAS E, ELECSYS and PRECICONTROL are trademarks of Roche. INTRALIPID is a trademark of Fresenius Kabi AB.

All other product names and trademarks are the property of their respective owners.

Additions, deletions or changes are indicated by a change bar in the margin.

© 2020, Roche Diagnostics

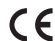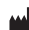

Roche Diagnostics GmbH, Sandhofer Strasse 116, D-68305 Mannheim  
[www.roche.com](http://www.roche.com)

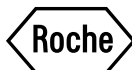

Supplement: bmjopen-2022-067641supp009.pdf [file bmjopen-2022-067641supp009.pdf]
