# Supplementary material for: Ethiopia National Food and Nutrition Survey to inform the Ethiopian National Food and Nutrition Strategy: a study protocol
Source: PubMed Central journal article supplement (PMC10151871; doi:10.1136/bmjopen-2022-067641), 2023-04-25

0755992500V4.0

# Elecsys Folate III

| REF        |            |     | SYSTEM                                                         |
|------------|------------|-----|----------------------------------------------------------------|
| 0755992190 | 0755992500 | 100 | <b>cobas e 411</b><br><b>cobas e 601</b><br><b>cobas e 602</b> |

## English

### System information

For **cobas e 411** analyzer: test number 1520

For **cobas e 601** and **cobas e 602** analyzers: Application Code Number 721

### Intended use

Binding assay for the in vitro quantitative determination of folate in human serum and plasma.

The binding assay is intended for use on Elecsys and **cobas e** immunoassay analyzers.

### Summary

Folate belongs to the family of B-group vitamins composed of an aromatic pteridine ring linked through a methylene group to p-aminobenzoic acid and a glutamate residue. Folate (folic acid) is vital for normal cellular functions and plays an essential role in nucleic acid synthesis, methionine regeneration, shuttling and redox reactions of one-carbon units required for normal metabolism and regulation.<sup>1,2</sup>

The folate metabolism can be exemplified as a cycle, where folate facilitates the transfer of one-carbon units from one molecule to another required in various biochemical reactions: for example, tetrahydrofolate (THF) accepts a single carbon unit from serine, which is reduced in a number of steps to 5-methyltetrahydrofolate (5-MTHF). 5-MTHF gives its methyl group to homocysteine, which is - with involvement of methionine synthase and vitamin B12 - enzymatically converted to methionine. The resulting THF starts again the cycle of methyl group synthesis. From methionine, the methyl groups are transferred to S-adenosylmethionine (SAM).<sup>3</sup> SAM serves as a methyl group donor in several methylation reactions, like DNA, RNA and protein methylation.<sup>1</sup>

The methionine cycle is highly sensitive to folate deficiency: with a low folate status, the ability of the cell to re-methylate homocysteine is impaired and this results in increased homocysteine concentrations in plasma.<sup>2</sup>

Folate also plays an essential role in the synthesis of purine and pyrimidine precursors of nucleic acids. Altered distribution of methyl groups and impaired DNA synthesis play an essential role in the development of cancers. Abnormal folate status has also been linked with the development of diseases like cardiovascular diseases, neural tube defects, cleft lip and palate, late pregnancy complications, neurodegenerative and psychiatric disorders.<sup>1,2</sup>

Folate belongs to the group of essential vitamins, i.e. it cannot be synthesized by the human organism and therefore must be absorbed from diet. Primary sources of folates are green and leafy vegetables, sprouts, fruits, brewer's yeast and liver.<sup>1,2</sup>

Folate deficiency can be caused by decreased nutritional intake, poor absorption of ingested folate in the intestine or increased demand of folate, for example during physical activity or pregnancy. Deficiency of folate can also be a result of liver diseases or impaired folate metabolism due to genetic defects or drug interactions.<sup>2</sup>

A clinical manifestation of both folate and vitamin B12 deficiency is the so called megaloblastic (macrocytic) anemia: due to the affected DNA synthesis and cell maturation, especially involving the cells of erythropoiesis, the total count of erythrocytes is significantly reduced. The hemoglobin synthesis capacity however is normal, which leads to abnormally large erythrocyte precursors ("macrocytes" or "megaloblasts"), which have an elevated hemoglobin content ("hyperchromic anemia").<sup>3,4</sup>

Because vitamin B12 and folate are closely interrelated in the cellular one-carbon unit metabolism, and also hematologic and clinical consequences of the two vitamin deficiency states might be similar, it is advisable to determine both parameters simultaneously in patients with the relevant symptoms of vitamin deficiency.<sup>3,4</sup>

### Test principle

Competition principle. Total duration of assay: 27 minutes.

- 1st incubation: By incubating 25 µL of sample with the folate pretreatment reagents 1 and 2, bound folate is released from endogenous folate binding proteins.
- 2nd incubation: By incubating the pretreated sample with the ruthenium labeled folate binding protein, a folate complex is formed, the amount of which is dependent upon the analyte concentration in the sample.
- 3rd incubation: After addition of streptavidin-coated microparticles and folate labeled with biotin, the unbound sites of the ruthenium labeled folate binding protein become occupied, with formation of a ruthenium labeled folate binding protein-folate biotin complex. The entire complex becomes bound to the solid phase via interaction of biotin and streptavidin.
- The reaction mixture is aspirated into the measuring cell where the microparticles are magnetically captured onto the surface of the electrode. Unbound substances are then removed with ProCell/ProCell M. Application of a voltage to the electrode then induces chemiluminescent emission which is measured by a photomultiplier.
- Results are determined via a calibration curve which is instrument-specifically generated by 2-point calibration and a master curve provided via the reagent barcode or e-barcode.

### Reagents - working solutions

The reagent rackpack (M, R1, R2) and the pretreatment reagents (PT1, PT2) are labeled as Fol III.

- PT1 Pretreatment reagent 1 (white cap), 1 bottle, 4 mL:  
Sodium 2-mercaptoethanesulfonate (MESNA) 40 g/L, pH 5.5.
- PT2 Pretreatment reagent 2 (gray cap), 1 bottle, 5 mL:  
Sodium hydroxide 25 g/L.
- M Streptavidin-coated microparticles (transparent cap), 1 bottle, 6.5 mL:  
Streptavidin-coated microparticles 0.72 mg/mL; preservative.
- R1 Folate binding protein-Ru(bpy)<sub>3</sub><sup>2+</sup> (gray cap), 1 bottle, 9 mL:  
Ruthenium labeled folate binding protein 75 µg/L; human serum albumin (stabilizer); borate/phosphate/citrate buffer 70 mmol/L, pH 5.5; preservative.
- R2 Folate-biotin (black cap), 1 bottle, 8 mL:  
Biotinylated folate 17 µg/L; biotin 120 µg/L; human serum albumin (stabilizer); borate buffer 100 mmol/L, pH 9.0; preservative.

### Precautions and warnings

For in vitro diagnostic use.

Exercise the normal precautions required for handling all laboratory reagents.

Disposal of all waste material should be in accordance with local guidelines. Safety data sheet available for professional user on request.

This kit contains components classified as follows in accordance with the Regulation (EC) No. 1272/2008:

2-methyl-2H-isothiazol-3-one hydrochloride

EUH 208 May produce an allergic reaction.

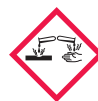

Danger

H290 May be corrosive to metals.

07559992500V4.0

# Elecsys Folate III



H314 Causes severe skin burns and eye damage.

## Prevention:

P280 Wear protective gloves/ protective clothing/ eye protection/ face protection.

## Response:

P301 + P330 IF SWALLOWED: Rinse mouth. Do NOT induce vomiting.  
+ P331

P303 + P361 IF ON SKIN (or hair): Take off immediately all contaminated clothing. Rinse skin with water.  
+ P353

P304 + P340 IF INHALED: Remove person to fresh air and keep comfortable for breathing.  
+ P310 Immediately call a POISON CENTER/ doctor.

P305 + P351 IF IN EYES: Rinse cautiously with water for several minutes. Remove contact lenses, if present and easy to do.  
+ P338 Continue rinsing. Immediately call a POISON CENTER/ doctor.  
+ P310

P390 Absorb spillage to prevent material damage.

Product safety labeling follows EU GHS guidance.

Contact phone: all countries: +49-621-7590

All human material should be considered potentially infectious. All products derived from human blood are prepared exclusively from the blood of donors tested individually and shown to be free from HBsAg and antibodies to HCV and HIV. The testing methods used assays approved by the FDA or cleared in compliance with the European Directive 98/79/EC, Annex II, List A.

However, as no testing method can rule out the potential risk of infection with absolute certainty, the material should be handled with the same level of care as a patient specimen. In the event of exposure, the directives of the responsible health authorities should be followed.<sup>5,6</sup>

Avoid foam formation in all reagents and sample types (specimens, calibrators and controls).

## Reagent handling

The reagents in the kit have been assembled into a ready-for-use unit that cannot be separated.

All information required for correct operation is read in from the respective reagent barcodes.

## Storage and stability

Store at 2-8 °C.

Do not freeze.

Store the Elecsys reagent kit **upright** in order to ensure complete availability of the microparticles during automatic mixing prior to use.

| Stability:              |                                                                                                                                                                                             |
|-------------------------|---------------------------------------------------------------------------------------------------------------------------------------------------------------------------------------------|
| unopened at 2-8 °C      | up to the stated expiration date                                                                                                                                                            |
| after opening at 2-8 °C | 56 days (8 weeks)                                                                                                                                                                           |
| on the analyzers        | 14 days (2 weeks) onboard or<br>28 days (4 weeks) when stored alternatively in the refrigerator and on the analyzer, with the total time onboard on the analyzer not exceeding 10 x 8 hours |

## Specimen collection and preparation

Only the specimens listed below were tested and found acceptable.

Serum collected using standard sampling tubes or tubes containing separating gel.

Li-heparin plasma. Li-heparin plasma tubes containing separating gel can be used.

Criterion: Method comparison serum versus Li-heparin plasma, slope 0.9-1.1 + intercept within  $< \pm 2 \times$  Limit of Blank (LoB), coefficient of correlation  $\geq 0.95$ .

Serum: Stable for 2 hours at 15-25 °C, 48 hours at 2-8 °C, 28 days at -20 °C ( $\pm 5$  °C). Freeze only once. Protect from light. Store the samples at 2-8 °C if they cannot be measured immediately.

Li-heparin plasma: Stable for 2 hours at 15-25 °C, 48 hours at 2-8 °C, 28 days at -20 °C ( $\pm 5$  °C). Freeze only once. Protect from light. Store the samples at 2-8 °C if they cannot be measured immediately.

The sample types listed were tested with a selection of sample collection tubes that were commercially available at the time of testing, i.e. not all available tubes of all manufacturers were tested. Sample collection systems from various manufacturers may contain differing materials which could affect the test results in some cases. When processing samples in primary tubes (sample collection systems), follow the instructions of the tube manufacturer.

Samples should not subsequently be altered with additives (biocides, anti-oxidants or substances possibly changing the pH of the sample) in order to avoid erroneous folate recovery.

Centrifuge samples containing precipitates before performing the assay.

Do not use heat-inactivated samples.

Ensure the samples, calibrators and controls are at 20-25 °C prior to measurement.

Due to possible evaporation effects, samples, calibrators and controls on the analyzers should be analyzed/measured within 2 hours.

*Note:* Hemolysis may significantly increase folate values due to high concentrations of folate in red blood cells. Therefore, hemolyzed samples are not suitable for use in this assay. Samples for folate determinations should be collected from fasting persons.

## Materials provided

See "Reagents – working solutions" section for reagents.

## Materials required (but not provided)

- [REF] 07560001190, Folate III CalSet, for 4 x 1.0 mL
- [REF] 05618860190, PreciControl Varia, for 4 x 3.0 mL
- [REF] 11732277122, Diluent Universal, 2 x 16 mL sample diluent or [REF] 03183971122, Diluent Universal, 2 x 36 mL sample diluent
- General laboratory equipment

## cobas e analyzer

Additional materials for the **cobas e 411** analyzer:

- [REF] 11662988122, ProCell, 6 x 380 mL system buffer
- [REF] 11662970122, CleanCell, 6 x 380 mL measuring cell cleaning solution
- [REF] 11930346122, Elecsys SysWash, 1 x 500 mL washwater additive
- [REF] 11933159001, Adapter for SysClean
- [REF] 11706802001, AssayCup, 60 x 60 reaction cups
- [REF] 11706799001, AssayTip, 30 x 120 pipette tips
- [REF] 11800507001, Clean-Liner

Additional materials for **cobas e 601** and **cobas e 602** analyzers:

- [REF] 04880340190, ProCell M, 2 x 2 L system buffer
- [REF] 04880293190, CleanCell M, 2 x 2 L measuring cell cleaning solution
- [REF] 03023141001, PC/CC-Cups, 12 cups to prewarm ProCell M and CleanCell M before use
- [REF] 03005712190, ProbeWash M, 12 x 70 mL cleaning solution for run finalization and rinsing during reagent change
- [REF] 03004899190, PreClean M, 5 x 600 mL detection cleaning solution
- [REF] 12102137001, AssayTip/AssayCup, 48 magazines x 84 reaction cups or pipette tips, waste bags
- [REF] 03023150001, WasteLiner, waste bags
- [REF] 03027651001, SysClean Adapter M

Additional materials for all analyzers:



0755992500V4.0

# Elecsys Folate III



| Sex  | Age<br>years | N    | Median |        | 2.5 <sup>th</sup> -97.5 <sup>th</sup> percentile |            |
|------|--------------|------|--------|--------|--------------------------------------------------|------------|
|      |              |      | ng/mL  | nmol/L | ng/mL                                            | nmol/L     |
| Both | ≥ 60         | 4671 | 16.6   | 37.6   | 5.6-45.8                                         | 12.7-103.8 |

These values were obtained in the USA during the National Health and Nutrition Examination Survey (NHANES), 1999-2004.

The values shown below were performed on samples from an apparently healthy population, using the Elecsys Folate III assay.

The calculation is based on 404 sera (177 men, 227 women). The age range was between 20 and 65 years. Pregnant or lactating women were excluded. The reference population was selected according to normal homocysteine values.

| N   | Median |        | 2.5 <sup>th</sup> -97.5 <sup>th</sup> percentile |           |
|-----|--------|--------|--------------------------------------------------|-----------|
|     | ng/mL  | nmol/L | ng/mL                                            | nmol/L    |
| 404 | 8.94   | 20.3   | 3.89-26.8                                        | 8.83-60.8 |

*Please note:* These values should only be used as a guideline.

It should be taken into consideration that differences in the expected values may exist with respect to population and dietary status.

Each laboratory should investigate the transferability of the expected values to its own patient population and if necessary determine its own reference ranges.

#### Folate deficient sample values

25 samples considered to be deficient<sup>a)</sup> in serum folate concentration were assessed using the Elecsys Folate III assay. All samples were found to be below the 2.5<sup>th</sup> percentile as given in the table above.

a) Folate deficiency was assessed by measurement of serum folate by two commercially available folate assays.

#### Specific performance data

Representative performance data on the analyzers are given below. Results obtained in individual laboratories may differ.

#### Precision

Precision was determined using Elecsys reagents, pooled human sera and controls in a protocol (EP5-A2) of the CLSI (Clinical and Laboratory Standards Institute); 2 runs per day in duplicate each for 21 days (n = 84). The following results were obtained:

| cobas e 411 analyzer |       |               |     |                        |      |
|----------------------|-------|---------------|-----|------------------------|------|
| Sample               | Mean  | Repeatability |     | Intermediate precision |      |
|                      |       | SD            | CV  | SD                     | CV   |
|                      | ng/mL | ng/mL         | %   | ng/mL                  | %    |
| Human serum 1        | 1.88  | 0.150         | 8.0 | 0.205                  | 10.9 |
| Human serum 2        | 3.92  | 0.200         | 5.1 | 0.318                  | 8.1  |
| Human serum 3        | 11.9  | 0.346         | 2.9 | 0.571                  | 4.8  |
| Human serum 4        | 13.4  | 0.301         | 2.2 | 0.574                  | 4.3  |
| Human serum 5        | 17.8  | 0.440         | 2.5 | 0.666                  | 3.7  |
| PreciControl Varia1  | 3.24  | 0.215         | 6.6 | 0.309                  | 9.5  |
| PreciControl Varia2  | 11.6  | 0.314         | 2.7 | 0.566                  | 4.9  |

| cobas e 411 analyzer |        |               |     |                        |      |
|----------------------|--------|---------------|-----|------------------------|------|
| Sample               | Mean   | Repeatability |     | Intermediate precision |      |
|                      |        | SD            | CV  | SD                     | CV   |
|                      | nmol/L | nmol/L        | %   | nmol/L                 | %    |
| Human serum 1        | 4.27   | 0.341         | 8.0 | 0.465                  | 10.9 |
| Human serum 2        | 8.90   | 0.454         | 5.1 | 0.722                  | 8.1  |
| Human serum 3        | 27.0   | 0.785         | 2.9 | 1.30                   | 4.8  |
| Human serum 4        | 30.4   | 0.683         | 2.2 | 1.30                   | 4.3  |

| cobas e 411 analyzer |        |               |     |                        |     |
|----------------------|--------|---------------|-----|------------------------|-----|
| Sample               | Mean   | Repeatability |     | Intermediate precision |     |
|                      |        | SD            | CV  | SD                     | CV  |
|                      | nmol/L | nmol/L        | %   | nmol/L                 | %   |
| Human serum 5        | 40.4   | 0.999         | 2.5 | 1.51                   | 3.7 |
| PreciControl Varia1  | 7.35   | 0.488         | 6.6 | 0.701                  | 9.5 |
| PreciControl Varia2  | 26.3   | 0.713         | 2.7 | 1.28                   | 4.9 |

| cobas e 601 and cobas e 602 analyzers |       |               |      |                        |      |
|---------------------------------------|-------|---------------|------|------------------------|------|
| Sample                                | Mean  | Repeatability |      | Intermediate precision |      |
|                                       |       | SD            | CV   | SD                     | CV   |
|                                       | ng/mL | ng/mL         | %    | ng/mL                  | %    |
| Human serum 1                         | 1.66  | 0.255         | 15.4 | 0.268                  | 16.1 |
| Human serum 2                         | 4.10  | 0.219         | 5.4  | 0.303                  | 7.4  |
| Human serum 3                         | 11.1  | 0.449         | 4.1  | 0.503                  | 4.6  |
| Human serum 4                         | 12.2  | 0.454         | 3.7  | 0.467                  | 3.8  |
| Human serum 5                         | 16.4  | 0.502         | 3.1  | 0.625                  | 3.8  |
| PreciControl Varia1                   | 2.34  | 0.189         | 8.1  | 0.228                  | 9.8  |
| PreciControl Varia2                   | 10.1  | 0.443         | 4.4  | 0.489                  | 4.9  |

| cobas e 601 and cobas e 602 analyzers |        |               |      |                        |      |
|---------------------------------------|--------|---------------|------|------------------------|------|
| Sample                                | Mean   | Repeatability |      | Intermediate precision |      |
|                                       |        | SD            | CV   | SD                     | CV   |
|                                       | nmol/L | nmol/L        | %    | nmol/L                 | %    |
| Human serum 1                         | 3.77   | 0.579         | 15.4 | 0.608                  | 16.1 |
| Human serum 2                         | 9.31   | 0.497         | 5.4  | 0.688                  | 7.4  |
| Human serum 3                         | 25.2   | 1.02          | 4.1  | 1.14                   | 4.6  |
| Human serum 4                         | 27.7   | 1.03          | 3.7  | 1.06                   | 3.8  |
| Human serum 5                         | 37.2   | 1.14          | 3.1  | 1.42                   | 3.8  |
| PreciControl Varia1                   | 5.31   | 0.429         | 8.1  | 0.518                  | 9.8  |
| PreciControl Varia2                   | 22.9   | 1.01          | 4.4  | 1.11                   | 4.9  |

#### Method comparison

a) A comparison of the Elecsys Folate III assay (traceable to WHO IS 03/178; y) and the Elecsys Folate III assay prior to standardization against WHO IS 03/178 (x) using clinical samples gave the following correlations (ng/mL):

Number of samples measured: 113

Passing/Bablok<sup>16</sup> Linear regression

$$y = 1.14x - 1.97 \quad y = 1.11x - 1.77$$

$$\tau = 0.939 \quad r = 0.994$$

The sample concentrations were between 2.1 and 18 ng/mL (4.8 and 41 nmol/L).

b) A comparison of the Elecsys Folate III assay (y) with a commercially available method (x) using clinical samples gave the following correlations (ng/mL):

Number of samples measured: 106

Passing/Bablok<sup>16</sup> Linear regression

$$y = 0.980x - 0.095 \quad y = 1.09x - 0.659$$

$$\tau = 0.924 \quad r = 0.984$$

The sample concentrations were between 1.9 and 17 ng/mL (4.3 and 39 nmol/L).

0755992500V4.0

# Elecsys Folate III



c) A comparison of the Elecsys Folate III assay on the **cobas e 601** analyzer (y) with the Elecsys Folate III assay on the **cobas e 411** analyzer (x) using clinical samples gave the following correlations (ng/mL):  
Number of samples measured: 105

Passing/Bablok<sup>16</sup> Linear regression

$y = 1.05x - 0.303$   $y = 0.981x + 0.143$

$r = 0.868$   $r = 0.982$

The sample concentrations were between 1.6 and 19 ng/mL (3.6 and 43 nmol/L).

## Analytical specificity

The following cross-reactivities were found, tested with folate concentrations of approximately 3.5 ng/mL, 10 ng/mL and 19 ng/mL.

| Cross-reactant | Concentration tested<br>ng/mL | Cross-reactivity<br>% |
|----------------|-------------------------------|-----------------------|
| Amethopterin   | 750                           | 2.5                   |
| Aminopterin    | 750                           | 4.4                   |
| Folinic acid   | 750                           | 0.7                   |

## References

- Nazki FH, Sameer AS, Ganaie BA. Folate: Metabolism, genes, polymorphisms and the associated diseases. *Gene* 2014;533(1):11-20.
- Scaglione F, Panzavolta G. Folate, folic acid and 5-methyltetrahydrofolate are not the same thing. *Xenobiotica* 2014;44(5):480-488.
- Reynolds EH. The neurology of folic acid deficiency. *Handb Clin Neurol* 2014;120:927-43.
- Wick M, Pinggera W, Lehmann P. *Clinical Aspects and Laboratory. Iron metabolism, Anemias.* Springer Verlag, Wien, New York, 6th edition 2011:41-42.
- Occupational Safety and Health Standards: Bloodborne pathogens. (29 CFR Part 1910.1030). Fed. Register.
- Directive 2000/54/EC of the European Parliament and Council of 18 September 2000 on the protection of workers from risks related to exposure to biological agents at work.
- Wu AHB. *Tietz clinical guide to laboratory tests*, 4th ed. St. Louis, Saunders/Elsevier 2006:608-609, 916-917.
- Paricaud K, Moulis G, Combis MS, et al. Causes of protidemia above 100 g/L. *Eur J Intern Med* 2014;25:e123.
- Filippatos TD, Liamis G, Christopoulou F, et al. Ten common pitfalls in the evaluation of patients with hyponatremia. *Eur J Intern Med* 2016;29:22-25.
- Mailankody S, Landgren O. Monoclonal gammopathy of undetermined significance and Waldenström's macroglobulinemia. *Best Pract Res Clin Haematol* 2016;29:187-193.
- Morel P, Duhamel A, Gobbi P, et al. International prognostic scoring system for Waldenström macroglobulinemia. *Blood* 2009;113:4163-4170.
- Rajkumar SV. Multiple Myeloma. *Curr Probl Cancer* 2009;33:7-64.
- Gertz MA. Immunoglobulin light chain amyloidosis: 2016 update on diagnosis, prognosis, and treatment. *Am J Hematol* 2016;91:947-956.
- Wu AHB. *Tietz clinical guide to laboratory tests*, 4th ed. St. Louis, Saunders/Elsevier 2006: 916-917, 925.
- Pfeiffer CM, Johnson CL, Jain RB, et al. Trends in blood folate and vitamin B-12 concentrations in the United States, 1988-2004. *Am J Clin Nutr* 2007;86:718-727.
- Bablok W, Passing H, Bender R, et al. A general regression procedure for method transformation. Application of linear regression procedures for method comparison studies in clinical chemistry, Part III. *J Clin Chem Clin Biochem* 1988 Nov;26(11):783-790.

For further information, please refer to the appropriate operator's manual for the analyzer concerned, the respective application sheets, the product information and the Method Sheets of all necessary components (if available in your country).

A point (period/stop) is always used in this Method Sheet as the decimal separator to mark the border between the integral and the fractional parts of a decimal numeral. Separators for thousands are not used.

## Symbols

Roche Diagnostics uses the following symbols and signs in addition to those listed in the ISO 15223-1 standard (for USA: see dialog.roche.com for definition of symbols used):

|                                                                                   |                                                     |
|-----------------------------------------------------------------------------------|-----------------------------------------------------|
|  | Contents of kit                                     |
|  | Analyzers/Instruments on which reagents can be used |
|  | Reagent                                             |
|  | Calibrator                                          |
|  | Volume after reconstitution or mixing               |
|  | Global Trade Item Number                            |

COBAS, COBAS E, ELECSYS and PRECICONTROL are trademarks of Roche. INTRALIPID is a trademark of Fresenius Kabi AB.

All other product names and trademarks are the property of their respective owners.

Additions, deletions or changes are indicated by a change bar in the margin.

© 2019, Roche Diagnostics

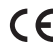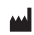

Roche Diagnostics GmbH, Sandhofer Strasse 116, D-68305 Mannheim  
www.roche.com

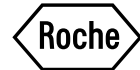

Supplement: bmjopen-2022-067641supp011.pdf [file bmjopen-2022-067641supp011.pdf]
