# Supplementary material for: Ethiopia National Food and Nutrition Survey to inform the Ethiopian National Food and Nutrition Strategy: a study protocol
Source: PubMed Central journal article supplement (PMC10151871; doi:10.1136/bmjopen-2022-067641), 2023-04-25
Supplement: bmjopen-2022-067641.draft_revisions.pdf [file bmjopen-2022-067641.draft_revisions.pdf]

# BMJ Open

BMJ Open is committed to open peer review. As part of this commitment we make the peer review history of every article we publish publicly available.

When an article is published we post the peer reviewers' comments and the authors' responses online. We also post the versions of the paper that were used during peer review. These are the versions that the peer review comments apply to.

The versions of the paper that follow are the versions that were submitted during the peer review process. They are not the versions of record or the final published versions. They should not be cited or distributed as the published version of this manuscript.

BMJ Open is an open access journal and the full, final, typeset and author-corrected version of record of the manuscript is available on our site with no access controls, subscription charges or pay-per-view fees (<http://bmjopen.bmj.com>).

If you have any questions on BMJ Open's open peer review process please email [info.bmjopen@bmj.com](mailto:info.bmjopen@bmj.com)

# BMJ Open

## Ethiopia National Food and Nutrition Survey to inform the Ethiopian Food and Nutrition Strategy: A study protocol

|                               |                                                                                                                                                                                                                                                                                                                                                                                                                                                                                                                                                                                                                                                                                                                                                                                                                                                                                                                                                                                                          |
|-------------------------------|----------------------------------------------------------------------------------------------------------------------------------------------------------------------------------------------------------------------------------------------------------------------------------------------------------------------------------------------------------------------------------------------------------------------------------------------------------------------------------------------------------------------------------------------------------------------------------------------------------------------------------------------------------------------------------------------------------------------------------------------------------------------------------------------------------------------------------------------------------------------------------------------------------------------------------------------------------------------------------------------------------|
| Journal:                      | <i>BMJ Open</i>                                                                                                                                                                                                                                                                                                                                                                                                                                                                                                                                                                                                                                                                                                                                                                                                                                                                                                                                                                                          |
| Manuscript ID                 | bmjopen-2022-067641                                                                                                                                                                                                                                                                                                                                                                                                                                                                                                                                                                                                                                                                                                                                                                                                                                                                                                                                                                                      |
| Article Type:                 | Protocol                                                                                                                                                                                                                                                                                                                                                                                                                                                                                                                                                                                                                                                                                                                                                                                                                                                                                                                                                                                                 |
| Date Submitted by the Author: | 25-Aug-2022                                                                                                                                                                                                                                                                                                                                                                                                                                                                                                                                                                                                                                                                                                                                                                                                                                                                                                                                                                                              |
| Complete List of Authors:     | <p>Woldeyohannes, Meseret ; Ethiopian Public Health Institute<br/> Girma, Meron; Ethiopian Public Health Institute, National Information Platforms for Nutrition<br/> Petros, Alemnesh; Ethiopian Public Health Institute<br/> Hussen, Alemayehu ; Ethiopian Public Health Institute<br/> Samuel, Aregash; Ethiopian Public Health Institute<br/> Dinssa, Danial ; Ethiopian Public Health Institute, Environmental and Public Health Research<br/> Challa, Feyissa; Ethiopian Public Health Institute<br/> Lailou, Arnaud; UNICEF, Dakar, Senegal<br/> Chitekwe, Stanley; UNICEF Ethiopia<br/> Baye, Kaleab ; Addis Ababa University,<br/> Noor , Ramadhani; UNICEF Ethiopia<br/> Donze, Anne Sophie; UNICEF Ethiopia<br/> Tollera, Getachew; Ethiopian Public Health Institute<br/> Dangiso, Mesay; Ethiopian Public Health Institute<br/> Tadesse, Lia; Ethiopia Ministry of Health<br/> Zelalem, Meseret; Ethiopia Ministry of Health<br/> Tessema, Masresha; Ethiopian Public Health Institute,</p> |
| Keywords:                     | EPIDEMIOLOGY, NUTRITION & DIETETICS, PUBLIC HEALTH                                                                                                                                                                                                                                                                                                                                                                                                                                                                                                                                                                                                                                                                                                                                                                                                                                                                                                                                                       |
|                               |                                                                                                                                                                                                                                                                                                                                                                                                                                                                                                                                                                                                                                                                                                                                                                                                                                                                                                                                                                                                          |

SCHOLARONE™  
Manuscripts

# Ethiopia National Food and Nutrition Survey to Inform the Ethiopian Food and Nutrition

## Strategy: A Study Protocol

Meseret Woldeyohannes<sup>1</sup>, Meron Girma<sup>1</sup>, Alemnesh Petros<sup>1</sup>, Alemayehu Hussen<sup>1</sup>, Aregash Samuel<sup>1</sup>, Daniel Abera Dinssa<sup>1</sup>, Feyissa Challa<sup>1</sup>, Arnaud Laillou<sup>2</sup>, Stanley Chitekwe<sup>3</sup>, Kaleab Baye<sup>4</sup>, Ramadhani Noor<sup>3</sup>, Anne Sophie Donze<sup>3</sup>, Getachew Tollera<sup>1</sup>, Mesay Hailu Dangiso<sup>1</sup>, Lia Tadesse<sup>5</sup>, Meseret Zelalem<sup>5</sup>, Masresha Tessema<sup>1\*</sup>

<sup>1</sup> Ethiopian Public Health Institute, Addis Ababa, Ethiopia

<sup>2</sup> Regional Nutrition Specialist, United Nations Children's Fund (UNICEF) Regional Office, Dakar, Senegal

<sup>3</sup> United Nations Children's Fund (UNICEF), Addis Ababa 12000, Ethiopia

<sup>4</sup> Center for Food Science and Nutrition, Addis Ababa University, Addis Ababa 12000, Ethiopia

<sup>5</sup> Ethiopian Ministry of Health, Addis Ababa, Ethiopia

\*Correspondence: Masresha Tessema, P.O.Box 1242 Ethiopian Public Health Institute, dr.masresha.tessema@gmail.com

Running title: National Food and Nutrition Strategy Survey

## 22 ABSTRACT

23 **Introduction** Ethiopia has made significant progress in reducing malnutrition in the past two decades.  
24 Despite such improvements, a substantial segment of the country's population remains chronically  
25 undernourished and suffers from not only micronutrient deficiencies but also from increasing diet-  
26 related non-communicable diseases. This survey aims to assess the anthropometric status, dietary intake  
27 and micronutrient status of Ethiopian children, women, and adolescent girls. The study will also assess  
28 the coverage of direct and indirect nutrition-related interventions, and map agricultural soil nutrients.  
29 The survey will serve as a baseline for the recently developed Ethiopian food system transformation plan  
30 and will inform the implementation of the National Food and Nutrition Strategy.

31 **Methods and analysis** Using a population-based cross-sectional survey, the study will collect data in the  
32 ten regions and two city administrations of Ethiopia. The study population will be women of reproductive  
33 age, children aged 0-59 months, school-aged children and adolescent girls. A total of 16,596 households  
34 will be surveyed, allowing us to generate national and regional estimates for selected indicators. A two-  
35 stage stratified cluster sampling procedure will be used to select households. In the first stage, 639  
36 enumeration areas will be selected using probability-proportional to size allocation. In the second stage  
37 26 eligible households will be selected within each enumeration area using systematic random selection.  
38 Primary outcomes include coverage of direct and indirect nutrition interventions, infant and young child  
39 feeding practices, food insecurity, dietary intakes for women, mental health of women and children,  
40 anthropometric status, micronutrient status, and soil nutrient status.

41 **Ethics and dissemination** The study protocol was approved by the Institutional Review Board of the  
42 Ethiopian Public Health Institute (protocol no: EPHI-IRB-317-2020). The finding of this survey will be  
43 disseminated in scientific forums, national research conference and stakeholder meetings; and will be  
44 submitted for publication in peer reviewed journals.

### 45 **Strengths and limitations of this study**

- 46 ▪ To the best of our knowledge, this will be among -if not-the first study to simultaneously collect  
47 data on anthropometric status, 24hr recall quantitative dietary intakes and the determination of  
48 micronutrient status in the same participants or household, while at the same time capturing  
49 data on the food system.
- 50 ▪ Previously, nutrition programs in Ethiopia have relied on data from small-scale studies and  
51 population-based surveys such as the Ethiopia Demographic and Health Surveys. The study will  
52 help to improve understanding of nutritional problem across multiple facets—from agricultural  
53 soil to people to the environment.
- 54 ▪ Inherent to the cross-sectional design of the study, the findings of this study cannot be used to  
55 establish cause and effect.
- 56 ▪ The study design prevents us from considering seasonal differences in nutritional outcomes and  
57 determinants.

## 60 INTRODUCTION

61 Globally, one in three are affected by one of more forms of malnutrition.<sup>1</sup> Women and children are  
62 particularly vulnerable to malnutrition due to increased physiological nutrient needs required to support  
63 fetal and child growth.<sup>2</sup> Nutritional deprivation during early life impairs growth and development, leading  
64 to poor school performance, reduced productivity, and loss of earnings in later life.<sup>3</sup> Consequently, the  
65 first 1000 days of life, from conception to the child's second year of life, was recognized as a critical  
66 window of opportunity to effectively prevent malnutrition.<sup>3 4</sup> Adolescence is also identified as a second  
67 window of opportunity to correct nutritional inadequacies and adversities faced in early life, but little is  
68 known about this life stage.

69 Despite significant progress over the past two decades, the burden of malnutrition in Ethiopia  
70 remains high.<sup>5-7</sup> Nationally, 37% of Ethiopian children under five years of age are stunted<sup>7</sup>, and 22% of  
71 women of reproductive age (WRA) are chronically undernourished (Body Mass Index (BMI) < 18.5  
72 Kg/m<sup>2</sup>).<sup>5</sup> Only 14% of children under two years of age consumed the minimum number of recommended  
73 food groups.<sup>5</sup> Furthermore, micronutrient deficiencies co-exist with chronic energy deficiency.<sup>8</sup> This along  
74 with the ongoing nutrition transition, characterized by shifts in diets<sup>9</sup>, is further complicating the  
75 nutrition landscape by increasing the prevalence of overweight and non-communicable diseases.<sup>5</sup> Nearly  
76 a fifth (16%) of Ethiopian adults are estimated to be hypertensive, and 3% are diabetic.<sup>10</sup> Therefore,  
77 addressing not only undernutrition but all forms of malnutrition is critical.

78 The Sustainable Development Goals (SDGs) recognize the importance of nutrition, primarily  
79 driven by the need to mitigate its detrimental consequences. Further, the 2012 World Health Assembly  
80 (WHA) identified global targets to be achieved by 2025 that aim to reduce stunting, anemia, low birth  
81 weight, and childhood obesity. These targets are used to track progress in SDG goal 2: Zero  
82 hunger.<sup>11</sup> Recognizing the importance of good nutrition, the Government of Ethiopia has made ending  
83 malnutrition a national priority. Ethiopia started implementing its first National Nutrition Program in  
84 2008.<sup>12</sup> The second phase of this program (2011-2016) was a multisectoral program aimed at accelerating  
85 progress in reducing malnutrition.<sup>13</sup> Moreover, Ethiopia's first Food and Nutrition Policy was endorsed in  
86 2018<sup>14</sup>, followed the National Food and Nutrition Strategy (FNS)<sup>15</sup> which was launched in 2021 to provide  
87 a framework for the operationalization of the policy. Acceleration of progress in the reduction of  
88 malnutrition requires the design and implementation of direct and indirect nutrition interventions that  
89 can be implemented at scale. To this end, understanding the various factors contributing to the different  
90 forms of malnutrition is critical.

91 Multiple factors operating at the immediate, underlying, and basic levels contribute to  
92 malnutrition.<sup>2</sup> Inadequate dietary intake and poor health are immediate determinants.<sup>2</sup> Household food  
93 security, child care practices, access to health services, and healthy environments are underlying  
94 determinants.<sup>16</sup> Structural and contextual factors such as economic structures, political, environmental,  
95 social and cultural factors are the basic determinants of malnutrition.<sup>2</sup> The contribution of these factors  
96 varies across different contexts, and target groups, but studies capturing all these factors in a single  
97 survey are scant. The lack of timely and comprehensive information on nutritional status across critical  
98 life stages and their determinants is a bottleneck that is preventing Ethiopia from designing effective  
99 interventions. Up to date and comprehensive data on the coverage of direct and indirect nutrition

1  
2  
3 100 interventions delivered across various implementing sectors of the food and nutrition strategy is not  
4 101 available yet. This is unfortunate as such data could inform the implementation of the food and nutrition  
5 102 strategy, but also serve as a baseline to which progress can be tracked against.

7  
8 103 Therefore, this study aimed to provide the first ever comprehensive information on the  
9 104 nutritional status of different populations in Ethiopia to support evidence-based implementation of the  
10 105 national food and nutrition strategy.

## 12 106 **Objectives of the survey**

14 107 The overall goal of this study is to produce nationally and regionally representative estimates on  
15 108 anthropometric status, coverage of nutrition interventions, dietary intakes, and micronutrient status for  
16 109 children, adolescent girls, and women of reproductive age in Ethiopia.

18 110 Specific objectives include;

- 21 111 1. Assess the coverage of nutrition-specific and nutrition-sensitive interventions.
- 22 112 2. Assess food consumption patterns and nutrients intakes of children aged 6–59 months, and  
23 113 women of reproductive age.
- 24 114 3. Assess the micronutrient status of children (vitamin A, anemia, iron, iodine and zinc),  
25 115 adolescent girls, and women of reproductive age (vitamin A, vitamin D, anemia, iron, iodine,  
26 116 zinc, folate, vitamin B<sub>12</sub>)
- 28 117 4. Assess the anthropometric status of under-5 children, school-age children (6-12 years),  
29 118 adolescent girls, and women of reproductive age.
- 30 119 5. Assess the geographical distribution of soil micronutrient status in Ethiopian agricultural soil.

## 32 120 **METHODS AND ANALYSIS**

### 34 121 **Study design**

35 122 This study is a nationally and sub-nationally (regionally) representative cross-sectional survey that will  
36 123 characterize dietary intake, micronutrient status, and access to nutrition-related services for different  
37 124 target populations. Given that soil nutrient content can influence micronutrient content of foods and  
38 125 hence affect nutrient intake, the soil nutrient composition will also be analyzed. The study will have four  
39 126 main components. The first component will assess nutrition-specific and nutrition-sensitive indicators  
40 127 (NSS) for all target groups (children aged 0-59 months and WRA, school-age children, adolescent  
41 128 girls) using semi-structured questionnaires. The second component will measure quantitative dietary  
42 129 intake for children aged 6-59 months and WRA (15-49 years). The third component of the survey will  
43 130 collect biomarker samples from all children (6-59 months), school-age children (6-12 years), adolescent  
44 131 girls (10-19 years), and WRA (15-49 years). The final component of the study will measure micronutrients  
45 132 in agricultural soils. The study data will be collected from July 2021 to December 2022.

### 49 133 **Study setting**

50 134 Ethiopia has an estimated population size of 120 million and is the second most populous country in  
51 135 Africa.<sup>17</sup> The majority of its population resides in rural areas (70%).<sup>17</sup> Agriculture accounts for 40% of the  
52 136 country's gross domestic product.<sup>17</sup> Children aged 15 years and younger make up 40% of the Ethiopian  
53 137 population in 2021.<sup>18</sup> Ethiopia is administratively divided into 10 regions and two city administrations.  
54 138 This study will be conducted in all of the regions and city administrations of the country. Figure 1  
55 139 provides a geographic representation of the study areas.

### 140 **Study participants**

141 The target population of this study are i) women of reproductive age (WRA) aged 15-49 years ii) children  
142 aged 0-59 months iii) school age children aged 6-12 years, and iv) adolescent girls aged 10-19 years, and  
143 v) household head.

### 144 **Sample size calculations**

145 Sample size was estimated to guarantee adequate precision to generate national and regional estimates  
146 for selected indicators for each study target group. Indicators used for each target group are shown in  
147 Table 1S in supplemental materials. The required number of households and target groups was calculated  
148 using a single population proportion formula at the regional level. We used region-specific prevalence  
149 estimates for indicators, a 5% margin-of-error, a design effect of 1.5, a household response rate of 95%,  
150 and an individual response rate of 80%. The initial sample size was then adjusted for region-specific  
151 average household size and percentage of the target population from the total population. An indicator  
152 that provides the maximum number of households was used to estimate the final sample size for each  
153 region. Regional sample sizes were summed up to derive the total (national) sample size. Based on these  
154 calculations, the total sample size for the overall survey was 16,596 households (Supplemental material  
155 Table 2S).

156 For WRA, dietary and biomarker data will be collected in half of the selected households within  
157 each Enumeration Area (EA). This selection will yield a total sample size of 7,386 WRA (50% of the  
158 expected 14,772 WRA). The sample size needed to assess dietary intakes and micronutrient status of  
159 WRA was calculated using the prevalence of inadequate zinc intake, which yielded the largest sample  
160 size.<sup>8,19</sup>

### 161 **Sampling procedures**

162 A two-stage stratified cluster sampling procedure will be used to select households. In the first stage, 639  
163 EAs, 257 urban and 382 rural will be selected using probability-proportional to-size allocation. We will use  
164 the 2018 Ethiopia Population and Housing Census enumeration areas sampling frame to select EAs (the  
165 Primary Sampling Units (PSUs)). The Central Statistical Agency (CSA) prepared the enumeration areas  
166 sampling frame. An EA typically contains 100-150 households. EA maps will be used to delineate the  
167 boundaries of the selected EA. In the second stage of sampling to identify eligible households, all  
168 households with the EA will be listed. A household will be eligible for selection if at least one of the study  
169 target groups are residents (de jure) or stayed at the household the night before the interview (de  
170 factor).

171 Twenty-six (26) eligible households will be selected within each EA using systematic random  
172 selection. All target groups will be eligible for the NSS interview in the selected households. All children  
173 aged 6-59 months will also be eligible for dietary assessment. Women residing in 13 households (Out of  
174 26 households) who will be selected randomly will be eligible for dietary assessment. Biomarker samples  
175 will be collected for all children under 5 years of age, school-age children, and adolescents in the selected  
176 households. Similar to dietary assessment, biomarker samples will be collected for women residing in half  
177 of the selected households.

178

## 179 **Outcomes**

### 180 **Coverage of direct and indirect nutrition interventions**

181 A structured questionnaire will be used to determine the coverage of direct and indirect nutrition  
182 interventions provided to children aged 6-59 months, WRA, and adolescent girls. Direct nutrition  
183 interventions included vitamin A supplementation, iron supplementation, zinc supplementation, growth  
184 monitoring and promotion, nutrition counseling services, and food fortification. Water, sanitation and  
185 hygiene, coverage of food or cash assistance program, women empowerment, and mental health will be  
186 some nutrition-sensitive indicators considered in this study. We will use standard indicator definitions  
187 proposed by the Data for Decisions to Expand Nutrition Transformation project (DataDENT) to assess  
188 coverage of nutrition programs.

### 189 **Anthropometric status**

190 Using standardized procedures, anthropometric measurements, including weight, height/length, and  
191 mid-upper arm circumference, will be taken for all study target populations.<sup>20</sup> Anthropometric indices  
192 (weight-for-height z-scores, length/height-for-age z-scores, weight-for-age z-scores, BMI-for-age z-scores)  
193 will be calculated using the WHO 2006 child growth standards and the WHO 2007 child growth reference  
194 data. Stunting (length/height-for-age z-scores below -2 SD), wasting (weight-for-height z-scores below -2  
195 SD), underweight (weight-for-age z-scores below -2 SD), thinness (BMI-for-age z-scores below -2 SD) and  
196 BMI will be the primary anthropometric outcomes of interest.

### 197 **Infant and young child feeding practices**

198 Infant and young child feeding practices will be assessed using the new World Health Organization (WHO)  
199 and United Nations Children's Fund (UNICEF) recommended 17 indicators to evaluate IYCF practices.<sup>21</sup>

### 200 **Food insecurity**

201 The Food Insecurity Experience Scale (FIES) will be used to assess household food security.<sup>22</sup> The FIES  
202 consists of eight questions that assess household experience related to adequate food access. Experience  
203 questions range from worrying about getting enough food to not eating for a whole day.

204 In addition to these outcome indicators, information on the sociodemographic characteristic of  
205 households, child health, maternal health, employment status, and household agricultural practices will  
206 be collected using structured questionnaires.

### 207 **Mental health of women**

208 Common mental health disorders will be assessed using the WHO Self-reporting questionnaire which  
209 consists of 20 questions. Women will be classified as having a common mental health disorder if row  
210 score was greater or equal to 6 out of 20.<sup>23</sup>

### 211 **Assessment of dietary intakes of children and WRA**

212 We will measure dietary intake for children aged 6-59 months and WRA. A one-day quantitative multiple-  
213 pass 24-hour recall will be conducted to assess dietary intakes. The interactive multiple-pass 24-hour  
214 recall interview consists of four steps designed to enhance memory.<sup>24</sup> All days of the week will be  
215 proportionately represented during the dietary survey to account for the day of the week effects on food



1  
2  
3 216 intake. To account for the day-to-day variability of dietary intake within individuals, a second non-  
4 217 consecutive day 24-hr recall (repeat) will be collected (within 2 to 10 days of the first recall) on a  
5 218 randomly selected sub-sample of WRA and children. The number of repeats needed is determined by  
6 219 allocating for each region 50 repeats, which is then multiplied by a design effect of 1.5 and a 10% non-  
7 220 response rate. The number of repeats was rounded up to 1244 recalls for each target group to ensure  
8 221 that the minimum number of repeats (n=83) needed from each region would be collected. Detailed non-  
9 222 standard recipe ingredient data will be collected for all mixed dishes that were prepared at home.

10  
11  
12  
13 223 ***Dietary assessment pre-survey work:*** We carried out pre-survey work to aid dietary data collection  
14 224 following recommendation set by the Intake: Center for Dietary Assessment.<sup>25 26</sup> An initial step was  
15 225 developing a food and ingredient list containing a comprehensive list of food items, mixed dishes, and  
16 226 ingredients expected to be consumed by the study target groups. The food list was generated using data  
17 227 from the first 2011 Ethiopian National Food Consumption Survey.<sup>19</sup> Other common foods consumed  
18 228 across the regions in Ethiopia were derived from the 2016 Household Income and Expenditure Surveys,<sup>27</sup>  
19 229 the Ethiopian Food Composition Tables, and dietary intake data from other recent dietary assessment  
20 230 surveys conducted by the Ethiopian Public Health Institute (EPHI). Portion size estimation methods  
21 231 suitable for large-scale studies were pre-selected for use in the survey following Intake  
22 232 recommendations.<sup>28</sup> The selected methods were direct measurement of actual foods consumed,  
23 233 standard unit: size and number, proxy measurement using play dough, water, rice, and maize flour, and  
24 234 finally using food price to estimate the amount of food consumed. Portion size estimation methods were  
25 235 assigned for all foods included in the food list.

#### 26 236 **Assessment of micronutrient status:**

27 237 Biological specimens will be collected from the study population to determine serum retinol, ferritin,  
28 238 soluble transferrin receptor (sTfR), zinc, folate, vitamin B<sub>12</sub>, and red blood cell (RBC) folate. Additionally,  
29 239 markers of inflammation, alpha(1)-acid glycoprotein (AGP), high-sensitivity C-reactive protein (hsCRP)  
30 240 will also be measured. We will also analyze parasites from stool specimens. All laboratory analyses will be  
31 241 performed at the EPHI Clinical chemistry, and Food Science and Nutrition Laboratories. Both laboratories  
32 242 participate in an external quality assessment scheme and are accredited by the Ethiopian National  
33 243 Accreditation Office (ENAO). Collection, storage, and analytical procedures for blood, urine, stool, and  
34 244 salt samples are described below.

35 245 ***Blood sample collection and analysis:*** Venous blood samples (5-7 mL) will be collected using vacutainer  
36 246 tubes following standard operating procedures.<sup>29</sup> Trace mineral-free vacutainer tubes will be used to  
37 247 collect blood for trace metal analysis. After collection, blood samples will be allowed to clot for 30  
38 248 minutes in cold boxes (<8 °C). Samples will then be centrifuged at 3000 rpm (revolution per minute) for  
39 249 10 minutes. The separated serum will be aliquoted and stored in -20°C portable freezers in the field.  
40 250 Samples will then be transported to EPHI and stored at -80°C until analysis. Hemoglobin will be measured  
41 251 in the field using Hemocue® (Hb 301, Hemocue AB, Angelholm, Sweden)<sup>30,30</sup> If the hemoglobin values are  
42 252 below WHO cutoff point(11g/dl), the phlebotomist will send whole blood samples to the EPHI laboratory  
43 253 to identify hemoglobinopathies using electrophoresis method.<sup>31</sup> Malaria test will be conducted on-site  
44 254 using Bioline™ Malaria Ag P.f rapid diagnostic test kits (RDT) for P. falciparum and P. vivax).<sup>32</sup> Serum

soluble transferrin receptor (sTfR), AGP, hsCRP, folate, red blood cell (RBC) folate, vitamin B<sub>12</sub>, and ferritin will be measured using Cobas 6000 analyzer (Roche Diagnostics GmbH, Mannheim, Germany). Serum retinol will be measured using high-performance liquid chromatography (HPLC) method<sup>32</sup>, and serum zinc and selenium will be measured using a microwave plasma atomic emission spectrometers (MP-AES) analyzer.

**Stool and urine sample collection and analysis:** Stool samples will be collected using stool cups and stored in 10 % formalin to preserve the parasite until analysis.<sup>33</sup> A portion of each stool sample will be used to detect direct ova, larvae and cysts of intestine parasites using formal ether concentration technique.<sup>34</sup> Urine samples will be collected from WRA and school-age children using 60 ml urine cup containers. Samples will be stored at -20°C. Urinary iodine excretion will be assessed by Sandell Kolthoff reaction at EPHI Laboratory using Shimadzu 1800 UV-Vis spectroscopy.<sup>35</sup>

**Salt collection and analysis:** Salt samples will be collected from households with WRA for whom dietary data will be collected. At least 25 grams (one coffee cup) of salt will be collected to determine iodine content using the iodometric titration method.<sup>36</sup>

#### **Assessment of nutrients in the soil**

Soil samples will be collected from three households in each EA. Zig-zag or cross sampling method will be used to collect 10 to 20 subsamples (0-30 cm depth) constituting one composite sample. Subsamples will be collected at a separation distance of five meters. After thoroughly mixing composite samples, 1 kg soil sample will be transferred to polyethylene bags. The collected soil samples will be air-dried in wooden trays and disaggregated using a ceramic mortar and pestle (soil grinder) at the EPHI soil laboratory. Samples will then pass through a 6 mm sieve of stainless-steel screens to remove debris and homogenize the soil sample. The sieved fraction will be further pulverized to pass through a 1 mm sieve for the micronutrient analysis. Soil zinc, iron, copper, and manganese will be determined following standard procedures.<sup>37</sup> Micronutrient content will be determined using inductively coupled plasma-optical emission spectroscopy (ICP-OES) after extraction with diethylene triamine penta acetic acid (DPTA). Additional variables that affect the mobility of micronutrients in the soil and their uptake into crops will also be measured. These variables include soil reaction (pH), electrical conductivity, organic matter, total nitrogen, and soil organic carbon content. Data collectors will also record topography, slope, cropping history, type, and fertilizer application information. Table 1 provides a summary of procedures for each of the four components of the survey by study target groups.

#### **Data quality assurance and analysis**

Training of trainers on components of the survey was held before training the data collectors and supervisors. After fifteen days of training on methodological procedures, questionnaires and quality assurance, the questionnaires were tested in a pilot group (in EAs not included in the actual survey), and adapted based on the received feedback from the survey team. The questionnaires (including the food list) were translated into local languages (Amharic, Oromifa, Tigrigna, Somali, and Afar) and back-translated to English to ensure the quality of the translation. The data collectors' measurements were standardized to ensure that the inter-observer variability was within tolerable limits. Supervisors received additional training on teamwork and on monitoring and supervising the data collection process. All data

294 collection tools are programmed using open-source software (ODK). Data quality checks were included  
295 during ODK programming to prevent data recording errors. These include restricted responses, filter  
296 insert choices, skip patterns, and defaults. During data collection daily data tracking forms will be  
297 completed to track completed surveys for each study components to prevent missing data. Before the  
298 start of the survey high frequency checks were identified and error tracking forms were designed to track  
299 data quality in real-time. These checks included completeness checks, target group tracking, and  
300 duplicate ID check. Random field-supervision visits will also be made to check data quality. Every day,  
301 collected data will be sent to the EPHI central server and imported into statistical software programs as  
302 comma-separated values (CSV) files. For laboratory analysis, a quality control chart will be used to ensure  
303 the internal and external quality control materials are in the acceptable range.

304 The primary data analysis will focus on computing frequencies and percentages for categorical  
305 variables and summary statistics (like means, medians SD, IQR) for summarizing continuous variables.  
306 Sample weights will be constructed based on the selection probabilities of EAs, eligible households, and  
307 non-response rates. All analyses will also be adjusted for the survey design. Additional subgroup analysis  
308 will be computed for variables with adequate sample sizes for each category. The Biomarkers Reflecting  
309 Inflammation and Nutrition Determinants of Anemia (BRINDA) Working Group's regression correction  
310 approach will be used to account for inflammation in the study of all micronutrients status using the  
311 biomarkers C-reactive protein (CRP) and AGP. Geostatistical analyses will be employed to determine the  
312 spatial patterns of micronutrient distribution in the soil and blood samples. The wealth index will be  
313 constructed using principal component analysis (PCA).<sup>38</sup> The Rasch model will be used to construct the  
314 Food Insecurity Experience Scale (FIES).<sup>22</sup> All analysis will be done using STATA 16 and ArcGIS/QGIS.

#### 315 **Patient and public involvement statement**

316 No patient involved.

#### 317 **Dissemination**

318 The study's findings will be disseminated through several communication channels, including stakeholder  
319 workshops, various local and International conferences and technical report. Additionally, the findings  
320 will be submitted as special issue to peer-reviewed journals.

#### 321 **DISCUSSION**

322 This comprehensive, nationally representative survey will for the first time characterize simultaneously  
323 the dietary intake and micronutrient status of Ethiopian children, adolescent girls and WRA. Besides, the  
324 study assesses key drivers of malnutrition including soil nutrient composition, as well as coverage of  
325 direct and indirect nutrition interventions. The survey will provide key insights informing the  
326 implementation of Ethiopia's National Food and Nutrition Strategy.

327 High-quality and timely data is critical to assess the burden of nutritional problems, identify  
328 vulnerable populations and priority actions, track the implementation of nutrition programs, and assess  
329 impact.<sup>39 40</sup> Ethiopia conducted its first-ever food consumption survey in 2011.<sup>19</sup> and its micronutrient  
330 survey in 2015.<sup>41</sup> Both surveys were collected at different times, which made it difficult to link the two  
331 surveys. Besides, the causes and solutions of malnutrition are complex and multisectoral; hence,  
332 requiring data on multiple indicators from various sectors spanning from soil nutrient, diets,

1  
2  
3 333 micronutrient status, to access and exposure to direct and indirect nutrition interventions. In this regard,  
4 334 this survey is uniquely positioned to integrate data from multiple domains to support evidence-based  
5 335 decision making for improved diets, nutrition, and overall wellbeing.  
6

7  
8 336 This study will allow us to evaluate progress relative to the last food consumption and  
9 337 micronutrient surveys, but more importantly will serve as a baseline to which future progress related to  
10 338 the implementation of the food and nutrition strategy will be evaluated. Furthermore, the current survey  
11 339 will also serve as a baseline for the Ethiopian Food System Transformation Plan by capturing majority  
12 340 indicators used for monitoring food systems related progress. Thus, filling information gaps that could  
13 341 have impeded successful implementation of the National Food and Nutrition Strategy (FNS). By  
14 342 establishing 13 strategic objectives, the FNS is intended to be aligned with the strategic directions of the  
15 343 Food and Nutrition Policy (FNP). Each strategy direction includes initiatives, actions, and key performance  
16 344 indicators, as well as leading and collaborating sectors. The key performance indicators should be  
17 345 evaluated to determine the progress of each implementing sector's achievement. The current survey will  
18 346 provide up to date national and subnational information on the current food and nutrition situation in  
19 347 Ethiopia for different target populations as well as provide comprehensive list of indicators that are  
20 348 pertinent to the implementation of the policy.<sup>39</sup> In addition, this study will provide information on  
21 349 context-specific determinants for prioritizing direct and indirect actions that can be implemented across  
22 350 sectors taking into account the specific needs of different target populations.  
23  
24  
25  
26

27  
28 351 Additionally, effective multisectoral interventions that address the immediate and underlying  
29 352 determinants of malnutrition must be implemented in order to accelerate the reduction of malnutrition  
30 353 in its all form.<sup>39</sup> These interventions need to address context-specific determinants to reduce  
31 354 malnutrition effectively.<sup>39</sup> The lack of timely and disaggregated information on the determinants of  
32 355 malnutrition is a bottleneck to preventing malnutrition, particularly among the most vulnerable target  
33 356 populations. This study will also provide information on the coverage and quality of interventions which  
34 357 can be used to contextualize National Food and Nutrition Strategy monitoring frameworks, monitor  
35 358 implementation and track progress towards global and local targets.  
36  
37  
38

39 359 Although this study will provide regionally and nationally representative estimates for key  
40 360 indicators and critical life stages, it has several limitations. Inherent to the cross-sectional design of the  
41 361 study, the findings of this study cannot be used to establish cause and effect. Additionally, the design  
42 362 prevents us from considering seasonal differences in nutritional outcomes and determinants. This study  
43 363 also relies on self-reported data, which is subject to recall bias. Notwithstanding the above-mentioned  
44 364 limitations, this study is uniquely designed to combine the assessment of anthropometric status, 24hr  
45 365 recall quantitative dietary intakes and the determination of micronutrient status in the same participants,  
46 366 while at the same time capturing data on the food system. Additionally, the study will be evaluating  
47 367 micronutrients in the agricultural soil, which will expand our understanding of factors that influence  
48 368 nutrition. To the best of our knowledge, this will be among -if not-the first study to simultaneously collect  
49 369 these variables from the same household. This could contribute to a better understanding of nutritional  
50 370 problem across multiple facets—from soil to people to the environment. In the past, nutrition programs  
51 371 implemented in Ethiopia have relied on information provided from small-scale studies and population-  
52 372 based surveys such as the Ethiopia Demographic and Health Surveys.<sup>5-7 42 43</sup> Although these data sources  
53  
54  
55  
56  
57  
58  
59  
60

1  
2  
3 373 provide some information to track progress and tailor interventions, they only provide data on a limited  
4 374 number of nutrition indicators and do not measure dietary intakes and assess biomarker status. This  
5 375 study will fill these data gaps by providing information on comprehensive indicators that show the  
6 376 burden and spatial distribution of micronutrient deficiencies and shifts of dietary patterns. Additionally,  
7 377 this study will provide information on emerging determinants such as mental health and intake of  
8 378 nutrients such as folate and B<sub>12</sub> that have not been included in previous studies. Finally, the inclusion of  
9 379 adolescent girls, and school-age children, will provide vital information on nutritional indicators for these  
10 380 target groups, which are often not included in other nationally representative surveys. This survey will  
11 381 also provide information on the coverage of direct interventions implemented in the health sectors and  
12 382 indirect interventions implemented in the agriculture, WASH, education and social protection sectors for  
13 383 whom scant data exists. Hence, this study will provide valuable information that will guide the  
14 384 implementation of strategic actions for the reduction of malnutrition in Ethiopia.

15  
16  
17  
18  
19 385  
20  
21  
22  
23  
24  
25  
26  
27  
28  
29  
30  
31  
32  
33  
34  
35  
36  
37  
38  
39  
40  
41  
42  
43  
44  
45  
46  
47  
48  
49  
50  
51  
52  
53  
54  
55  
56  
57  
58  
59  
60

1  
2  
3 386 **Acknowledgments:**  
4

5 387 **Contributions:** MT, AL, SC, MW, AP, AS, and MG conceived the study and drafted the original protocol.  
6 388 All authors participated in refining of the protocol. AH, MW, MG and MT played a major role in the  
7 389 statistical consideration. KB, AL, SC, GT, MH, LT and MZ supervised manuscript preparation. All authors  
8 390 took responsibility for reviewing, final editing and approval of the manuscript.  
9

10  
11 391 **Funding:** This work was supported by Power of Nutrition, BMGF and World Bank through UNICEF, NI, and  
12 392 GAIN  
13

14 393 **Competing interests:** The authors declare that they have no conflicts of interest.  
15

16  
17 394 **Patient consent for publication:** Not required  
18

19 395 **Ethical approval:**

20 396 The study protocol is approved by the Institutional Review Board of the Ethiopian Public Health Institute  
21 397 (protocol no: EPHI-IRB-317-2020). Written informed consent will be obtained from each respondent.  
22 398 Confidentiality of all collected data will be given high priority during each stage of data handling.  
23 399 Individual names and personal information of respondents will be kept confidential and data sets will be  
24 400 kept anonymous for analysis.  
25  
26  
27

28 401

29  
30 402

31  
32 403

33  
34 404  
35  
36  
37  
38  
39  
40  
41  
42  
43  
44  
45  
46  
47  
48  
49  
50  
51  
52  
53  
54  
55  
56  
57  
58  
59  
60

405 **References**

- 406 1. Fanzo J, Hawkes C, Udomkesmalee E, et al. 2018 Global Nutrition Report. 2019
- 407 2. Black RE, Victora CG, Walker SP, et al. Maternal and child undernutrition and overweight in low-income  
408 and middle-income countries. *The Lancet* 2013;382(9890):427-51. doi: 10.1016/s0140-  
409 6736(13)60937-x
- 410 3. Martorell R. Improved nutrition in the first 1000 days and adult human capital and health. *Am J Hum*  
411 *Biol* 2017;29(2) doi: 10.1002/ajhb.22952 [published Online First: 2017/01/25]
- 412 4. United Nations. Transforming our world: The 2030 agenda for sustainable development, 2015.
- 413 5. Central Statistical Agency [Ethiopia] and ICF. Ethiopia demographic and health survey 2016. Addis  
414 Ababa, Ethiopia and Calverton, Maryland, USA: CSA and ICF, 2016.
- 415 6. Central Statistical Agency [Ethiopia] and ORC Macro. Ethiopia demographic and health survey 2000.  
416 Addis Ababa, Ethiopia and Calverton, Maryland, USA: CSA and ORC Macro, 2001.
- 417 7. Ethiopian Public Health Institute (EPHI) [Ethiopia] and ICF. Ethiopia Mini Demographic and Health  
418 Survey 2019: Key Indicators. Rockville, Maryland, USA: EPHI and ICF, 2019.
- 419 8. Ethiopian Public Health Institute. Ethiopian national micronutrient survey report Ethiopian Public  
420 Health Institute, 2016.
- 421 9. Hassen I, Dereje M, Minten B, et al. Diet transformation in Africa: the case of Ethiopia. *Agricultural*  
422 *Economics* 2017
- 423 10. Ethiopian Public Health Institute, Federal Ministry of Health, World Health Organization. Ethiopia  
424 STEPS report in risk factors for non-communicable diseases and prevalence of selected NCDs  
425 Addis Ababa, Ethiopia: Ethiopian Public Health Institute 2016.
- 426 11. World Health Organization. Global nutrition monitoring framework: Operational guidance for tracking  
427 progress in meeting targets for 2025. Geneva: WHO, 2017.
- 428 12. Federal Democratic Republic of Ethiopia. National Nutrition Program: 2013-2015. Addis  
429 Ababa, Ethiopia, 2013.
- 430 13. Federal Democratic Republic of Ethiopia. National Nutrition Program: 2016-2020. Addis  
431 Ababa, Ethiopia., 2016.
- 432 14. Federal Democratic Republic of Ethiopia. Food and Nutrition Policy, 2018.
- 433 15. Federal Democratic Republic of Ethiopia. National Food and Nutrition Strategy (2021-2023), 2021.
- 434 16. Reinhardt K, Fanzo J. Addressing Chronic Malnutrition through Multi-Sectoral, Sustainable  
435 Approaches: A Review of the Causes and Consequences. *Front Nutr* 2014;1:13. doi:  
436 10.3389/fnut.2014.00013 [published Online First: 2014/01/01]
- 437 17. Bank W. Population projections Ethiopia 2021 [
- 438 18. Bardosh KL, Hussein JW, Sadik EA, et al. Chicken eggs, childhood stunting and environmental hygiene:  
439 an ethnographic study from the Campylobacter genomics and environmental enteric dysfunction  
440 (CAGED) project in Ethiopia. *One Health Outlook* 2020;2(1) doi: 10.1186/s42522-020-00012-9
- 441 19. Ethiopian Public Health Institute. Ethiopian national food consumption survey Ethiopian Public Health  
442 Institute, 2013.
- 443 20. UNICEF Wa. Recommendations for data collection, analysis and reporting on anthropometric  
444 indicators in children under 5 years old. : World Health Organization and the United Nations  
445 Children's Fund (UNICEF), 2019.
- 446 21. WHO, UNICEF. Indicators for assessing infant and young child feeding practices: definitions and  
447 measurement methods. Geneva: World Health Organization and the United Nations Children's  
448 Fund (UNICEF), 2021.
- 449 22. Ville AS, Tsun Po JY, Sen A, et al. Food security and the Food Insecurity Experience Scale (FIES):  
450 ensuring progress by 2030. *Food Security* 2019;11(3):483-91. doi: 10.1007/s12571-019-00936-9
- 451 23. World Health Organization. Self-reported mental health questionnaires 1994.

- 1  
2  
3 452 24. Gibson RS, Ferguson EL. An interactive 24-hour recall for assessing the adequacy of iron and zinc  
4 453 intakes in developing countries HarvestPlus 2008.
- 5 454 25. Vossenaar M, Arimond M, Deitchler M, et al. An overview of the main pre-survey tasks required for  
6 455 large-scale quantitative 24-Hour recall dietary surveys in low- and middle-income countries.  
7 456 Washington, DC: Intake – Center for Dietary Assessment/FHI Solutions., 2020.
- 8 457 26. Intake – Center for Dietary Assessment. Dietary Survey Protocol Template: An Outline to Assist with  
9 458 the Development of a Protocol for a Quantitative 24-Hour Dietary Recall Survey in a Low- or  
10 459 Middle-Income Country Washington, DC: Intake – Center for Dietary Assessment/FHI Solutions.,  
11 460 2020.
- 12 461 27. Central Statistical Agency[Ethiopia]. Household Consumption and Expenditure (HCE) Survey 2015/16:  
13 462 Analytical Report. Addis Ababa: CSA, 2016.
- 14 463 28. Vossenaar M, Lubowa A, Hotz C, et al. Considerations for the Selection of Portion Size Estimation  
15 464 Methods for Use in Quantitative 24-Hour Dietary Recall Surveys in Low- and Middle-Income  
16 465 Countries. Washington, DC: Intake – Center for Dietary Assessment/FHI Solutions, 2020.
- 17 466 29. Organization WH. Micronutrient survey manual. 2020
- 18 467 30. Jaggernath M, Naicker R, Madurai S, et al. Diagnostic Accuracy of the HemoCue Hb 301, STAT-Site  
19 468 MHgb and URIT-12 Point-of-Care Hemoglobin Meters in a Central Laboratory and a Community  
20 469 Based Clinic in Durban, South Africa. *PloS one* 2016;11(4):e0152184. doi:  
21 470 10.1371/journal.pone.0152184 [published Online First: 2016/04/06]
- 22 471 31. Wieringa FT, Dahl M, Chamnan C, et al. The High Prevalence of Anemia in Cambodian Children and  
23 472 Women Cannot Be Satisfactorily Explained by Nutritional Deficiencies or Hemoglobin Disorders.  
24 473 *Nutrients* 2016;8(6) doi: 10.3390/nu8060348 [published Online First: 2016/06/25]
- 25 474 32. Lee GC, Jeon ES, Le DT, et al. Development and evaluation of a rapid diagnostic test for Plasmodium  
26 475 falciparum, P. vivax, and mixed-species malaria antigens. *Am J Trop Med Hyg* 2011;85(6):989-93.  
27 476 doi: 10.4269/ajtmh.2011.11-0265 [published Online First: 2011/12/07]
- 28 477 33. Demeke G, Fenta A, Dilnessa T. Evaluation of Wet Mount and Concentration Techniques of Stool  
29 478 Examination for Intestinal Parasites Identification at Debre Markos Comprehensive Specialized  
30 479 Hospital, Ethiopia. *Infect Drug Resist* 2021;14:1357-62. doi: 10.2147/IDR.S307683 [published  
31 480 Online First: 2021/04/17]
- 32 481 34. Kache R, Phasuk N, Viriyavejakul P, et al. Prevalence of soil-transmitted helminth infections and  
33 482 associated risk factors among elderly individuals living in rural areas of southern Thailand. *BMC*  
34 483 *public health* 2020;20(1):1882. doi: 10.1186/s12889-020-09986-7 [published Online First:  
35 484 2020/12/09]
- 36 485 35. Machado A, Lima L, Mesquita RBR, et al. Improvement of the Sandell-Kolthoff reaction method  
37 486 (ammonium persulfate digestion) for the determination of iodine in urine samples. *Clin Chem Lab*  
38 487 *Med* 2017;55(9):e206-e08. doi: 10.1515/cclm-2016-1094 [published Online First: 2017/03/18]
- 39 488 36. Jooste PL, Strydom E. Methods for determination of iodine in urine and salt. *Best Pract Res Clin*  
40 489 *Endocrinol Metab* 2010;24(1):77-88. doi: 10.1016/j.beem.2009.08.006 [published Online First:  
41 490 2010/02/23]
- 42 491 37. Lindsay WL, Norvell W. Development of a DTPA soil test for zinc, iron, manganese, and copper. *Soil Sci*  
43 492 *Soc Am J* 1978;42(3):421-28.
- 44 493 38. Karamizadeh S, Abdullah SM, Manaf AA, et al. An overview of principal component analysis. *Journal of*  
45 494 *Signal and Information Processing* 2020;4
- 46 495 39. Heidkamp RA, Piwoz E, Gillespie S, et al. Mobilising evidence, data, and resources to achieve global  
47 496 maternal and child undernutrition targets and the Sustainable Development Goals: an agenda for  
48 497 action. *The Lancet* 2021 doi: 10.1016/s0140-6736(21)00568-7



- 1  
2  
3 498 40. Victora CG, Christian P, Vidaletti LP, et al. Revisiting maternal and child undernutrition in low-income  
4 499 and middle-income countries: variable progress towards an unfinished agenda. *The Lancet* 2021  
5 500 doi: 10.1016/s0140-6736(21)00394-9  
6 501  
7 501 41. Institute EPH. Ethiopian national micronutrient Survey. Addis Ababa, Ethiopia Ethiopian Public Health  
8 502 Institute  
9  
10 503 2016.  
11 504 42. Central Statistical Agency [Ethiopia] and ICF. Ethiopia demographic and health survey 2011. Addis  
12 505 Ababa, Ethiopia and Calverton, Maryland, USA: CSA and ICF, 2011.  
13 506 43. Central Statistical Agency [Ethiopia] and ORC Macro. Ethiopia demographic and health survey 2005.  
14 507 Addis Ababa, Ethiopia and Calverton, Maryland, USA: CSA and ORC Macro, 2006.  
15  
16 508  
17  
18 509  
19  
20 510  
21  
22 511  
23  
24 512  
25  
26 513  
27  
28 514  
29  
30 515  
31  
32 516  
33  
34 517  
35  
36 518  
37  
38 519  
39  
40 520  
41  
42 521  
43  
44 522  
45  
46 523  
47  
48 524  
49  
50 525  
51  
52 526  
53  
54 527  
55  
56 528  
57  
58 529  
59  
60

1  
2  
3 530 **Figure 1.**Map showing study enumeration areas across regions  
4  
5  
6  
7  
8  
9  
10  
11  
12  
13  
14  
15  
16  
17  
18  
19  
20  
21  
22  
23  
24  
25  
26  
27  
28  
29  
30  
31  
32  
33  
34  
35  
36  
37  
38  
39  
40  
41  
42  
43  
44  
45  
46  
47  
48  
49  
50  
51  
52  
53  
54  
55  
56  
57  
58  
59  
60

For peer review only

1  
2  
3  
4  
5  
6  
7  
8  
9  
10  
11  
12  
13  
14  
15  
16  
17  
18  
19  
20  
21  
22  
23  
24  
25  
26  
27  
28  
29  
30  
31  
32  
33  
34  
35  
36  
37  
38  
39  
40  
41  
42  
43  
44  
45  
46  
47  
48  
49  
50  
51  
52  
53  
54  
55  
56  
57  
58  
59  
60

For peer review only

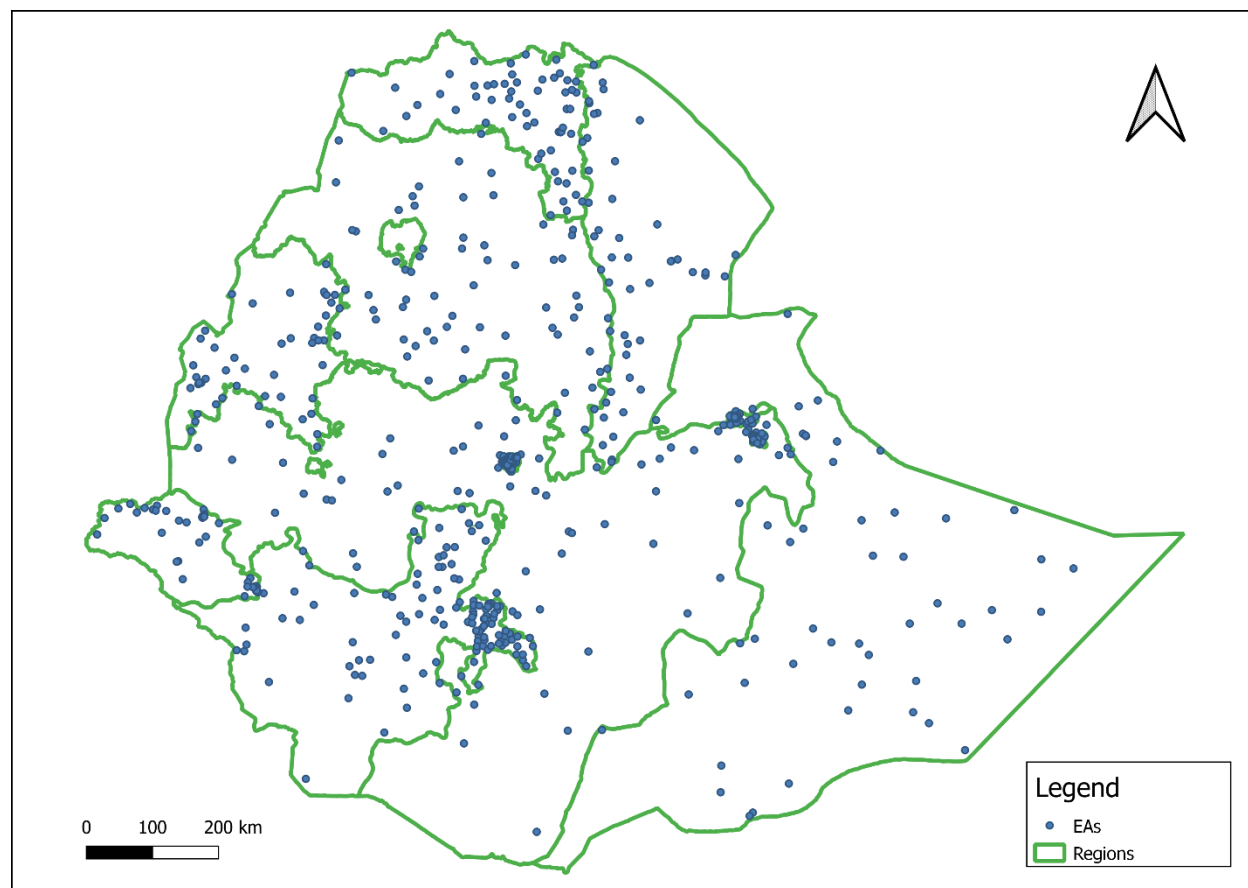

**Figure 1.** Map showing study enumeration areas across regions

**Table 1.** Summary of data collection procedures for each of the four components of the survey

|                                                                    | Child<br>0-5<br>months | Child<br>6-23<br>months | Child<br>24-59<br>months | School<br>children<br>6-12 years | Adolescent<br>girls<br>10-19 years | WRA<br>15-49<br>years | Household |
|--------------------------------------------------------------------|------------------------|-------------------------|--------------------------|----------------------------------|------------------------------------|-----------------------|-----------|
| <b>Nutrition specific and nutrition sensitive indicators (NSS)</b> |                        |                         |                          |                                  |                                    |                       |           |
| Infant and young child feeding practices                           | X                      | X                       |                          |                                  |                                    |                       |           |
| Nutritional information for adolescent girls                       |                        |                         |                          |                                  | X                                  |                       |           |
| Food insecurity                                                    |                        |                         |                          |                                  |                                    |                       | X         |
| Water, sanitation and hygiene practices                            |                        |                         |                          |                                  |                                    |                       | X         |
| Coverage of food fortification                                     |                        |                         |                          |                                  |                                    |                       | X         |
| Agricultural practices                                             |                        |                         |                          |                                  |                                    |                       | X         |
| Mental health                                                      |                        |                         |                          |                                  |                                    | X                     |           |
| Anthropometric status                                              | X                      | X                       | X                        |                                  | X                                  | X                     |           |
| <b>Dietary assessment</b>                                          |                        |                         |                          |                                  |                                    |                       |           |
| 24-hr recall quantitative dietary intake                           |                        | X                       | X                        |                                  |                                    | X                     |           |
| <b>Assessment of biomarker status</b>                              |                        |                         |                          |                                  |                                    |                       |           |
| Blood sample                                                       |                        | X                       | X                        | X                                | X                                  | X                     |           |
| Urine sample                                                       |                        |                         |                          | X                                |                                    | X                     |           |
| Stool sample                                                       |                        | X                       | X                        | X                                | X                                  | X                     |           |
| Salt sample collection                                             |                        |                         |                          |                                  |                                    |                       | X         |
| <b>Assessment of micronutrients in the Soil</b>                    |                        |                         |                          |                                  |                                    |                       |           |
| Soil micronutrient assessment                                      |                        |                         |                          |                                  |                                    |                       | X         |

**Table 1S.** Key indicators used to estimate sample size for each target group

| Target Group                                | Key indicators used to estimate sample size |
|---------------------------------------------|---------------------------------------------|
| Children under 5 years of age (0-59 months) | Vitamin A deficiency                        |
|                                             | Total goiter rate                           |
|                                             | Stunting                                    |
|                                             | Any anemia                                  |
|                                             | Zinc deficiency                             |
| Women of reproductive age (15-49 years)     | Prevalence of inadequate intake of zinc     |
|                                             | Vitamin A deficiency                        |
|                                             | Total goiter rate                           |
|                                             | Any anemia                                  |
|                                             | Zinc deficiency                             |
|                                             | RBC folate                                  |
|                                             | Serum folate                                |
|                                             | Vitamin B <sub>12</sub>                     |
|                                             | Iodized salt use                            |
|                                             | Prevalence of inadequate intake of iron     |
| Prevalence of inadequate intake of zinc     |                                             |
| School age children (6 to 12 years)         | Prevalence of inadequate intake vitamin A   |
|                                             | Vitamin A deficiency                        |
|                                             | Total goiter rate                           |
|                                             | Any anemia                                  |
| Adolescent girls (10 to 19 years)           | Iodine deficiency                           |
|                                             | Zinc deficiency                             |
|                                             | Any anemia                                  |

**Table 2S.** Sample size determination and allocation

| Region            | Indicator used to estimate sample size | Number of EA | Number of HH | Expected number of Under Children | Expected number of 5 WRA | Expected number of 6-59 months children | Expected number of adolescent girls |
|-------------------|----------------------------------------|--------------|--------------|-----------------------------------|--------------------------|-----------------------------------------|-------------------------------------|
| Tigray            | Any anemia                             | 55           | 1,432        | 590                               | 1,236                    | 753                                     | 516                                 |
| Afar              | Stunting                               | 51           | 1,328        | 539                               | 1,096                    | 695                                     | 406                                 |
| Amhara            | Stunting                               | 61           | 1,585        | 619                               | 1,253                    | 843                                     | 531                                 |
| Oromia            | IDD                                    | 62           | 1,622        | 891                               | 1,539                    | 1,111                                   | 739                                 |
| Somali            | IDD                                    | 55           | 1,424        | 855                               | 1,268                    | 1,000                                   | 492                                 |
| Benishangul-Gumuz | Stunting                               | 49           | 1,282        | 555                               | 1,127                    | 732                                     | 475                                 |
| SNNPR             | Any anemia                             | 59           | 1,528        | 818                               | 1,492                    | 1,000                                   | 692                                 |
| Gambela           | Any anemia                             | 47           | 1,211        | 428                               | 1,018                    | 568                                     | 373                                 |
| Harari            | Any anemia                             | 45           | 1,164        | 375                               | 978                      | 499                                     | 348                                 |
| Addis Ababa       | IDD/ TGR                               | 54           | 1,411        | 413                               | 1,274                    | 405                                     | 262                                 |
| Dire Dawa         | Stunting                               | 47           | 1,215        | 382                               | 1,128                    | 480                                     | 360                                 |
| Sidama            | Any anemia                             | 54           | 1,395        | 747                               | 1,363                    | 914                                     | 632                                 |
| Total sample size |                                        | 639          | 16,596       | 7,213                             | 14,772                   | 9,001                                   | 5,824                               |

## STROBE Statement—checklist of items that should be included in reports of observational studies

|                              | Item No | Recommendation                                                                                                                                                                                                                                                                                                                                                                                                                                                                                                                                                                                                                                                                                   | Reported on page #                                            |
|------------------------------|---------|--------------------------------------------------------------------------------------------------------------------------------------------------------------------------------------------------------------------------------------------------------------------------------------------------------------------------------------------------------------------------------------------------------------------------------------------------------------------------------------------------------------------------------------------------------------------------------------------------------------------------------------------------------------------------------------------------|---------------------------------------------------------------|
| <b>Title and abstract</b>    | 1       | (a) Indicate the study's design with a commonly used term in the title or the abstract<br>(b) Provide in the abstract an informative and balanced summary of what was done and what was found                                                                                                                                                                                                                                                                                                                                                                                                                                                                                                    | Title p.1; Abstract p.2-3                                     |
| <b>Introduction</b>          |         |                                                                                                                                                                                                                                                                                                                                                                                                                                                                                                                                                                                                                                                                                                  |                                                               |
| <b>Introduction</b>          | 4       | Explain the scientific background and rationale for the investigation being reported                                                                                                                                                                                                                                                                                                                                                                                                                                                                                                                                                                                                             | <b>Introduction</b><br>p.3-4                                  |
| Objectives                   | 5       | State specific objectives, including any prespecified hypotheses                                                                                                                                                                                                                                                                                                                                                                                                                                                                                                                                                                                                                                 | Background p.5<br>last statements                             |
| <b>Methods</b>               |         |                                                                                                                                                                                                                                                                                                                                                                                                                                                                                                                                                                                                                                                                                                  |                                                               |
| Study design                 | 5       | Present key elements of study design early in the paper                                                                                                                                                                                                                                                                                                                                                                                                                                                                                                                                                                                                                                          | Methods (data source) p.4                                     |
| Setting                      | 5       | Describe the setting, locations, and relevant dates, including periods of recruitment, exposure, follow-up, and data collection                                                                                                                                                                                                                                                                                                                                                                                                                                                                                                                                                                  | Methods (data source) p.5                                     |
| Participants                 | 5       | (a) <i>Cohort study</i> —Give the eligibility criteria, and the sources and methods of selection of participants. Describe methods of follow-up<br><i>Case-control study</i> —Give the eligibility criteria, and the sources and methods of case ascertainment and control selection. Give the rationale for the choice of cases and controls<br><i>Cross-sectional study</i> —Give the eligibility criteria, and the sources and methods of selection of participants<br>(b) <i>Cohort study</i> —For matched studies, give matching criteria and number of exposed and unexposed<br><i>Case-control study</i> —For matched studies, give matching criteria and the number of controls per case | Methods (participants) p.5-8                                  |
| Variables                    | 5       | Clearly define all outcomes, exposures, predictors, potential confounders, and effect modifiers. Give diagnostic criteria, if applicable                                                                                                                                                                                                                                                                                                                                                                                                                                                                                                                                                         | Methods (all outcome and exposure variables are listed) p.6-8 |
| Data sources/<br>measurement | NA      | For each variable of interest, give sources of data and details of methods of assessment (measurement). Describe comparability of assessment methods if there is more than one group                                                                                                                                                                                                                                                                                                                                                                                                                                                                                                             | Methods (methods of measurement indicated in) p.5-8           |
| Bias                         | 10      | Describe any efforts to address potential sources of bias                                                                                                                                                                                                                                                                                                                                                                                                                                                                                                                                                                                                                                        | Methods (data quality indicated) p.10-11                      |
| Study size                   | 5-6     | Explain how the study size was arrived at                                                                                                                                                                                                                                                                                                                                                                                                                                                                                                                                                                                                                                                        | Methods (data source, statistical                             |



analysis) p.5

|    |              |    |                                                                                                                              |
|----|--------------|----|------------------------------------------------------------------------------------------------------------------------------|
| 1  |              |    |                                                                                                                              |
| 2  |              |    |                                                                                                                              |
| 3  |              |    |                                                                                                                              |
| 4  |              |    |                                                                                                                              |
| 5  |              |    |                                                                                                                              |
| 6  | Quantitative | 10 | Explain how quantitative variables were handled in the analyses. If applicable, describe which groupings were chosen and why |
| 7  | variables    |    |                                                                                                                              |
| 8  |              |    |                                                                                                                              |
| 9  |              |    |                                                                                                                              |
| 10 |              |    |                                                                                                                              |
| 11 |              |    |                                                                                                                              |
| 12 |              |    |                                                                                                                              |
| 13 |              |    |                                                                                                                              |
| 14 | Statistical  | 10 | (a) Describe all statistical methods, including those used to control for confounding                                        |
| 15 | methods      |    |                                                                                                                              |
| 16 |              |    |                                                                                                                              |
| 17 |              |    |                                                                                                                              |
| 18 |              |    |                                                                                                                              |
| 19 |              |    | (b) Describe any methods used to examine subgroups and interactions                                                          |
| 20 |              |    |                                                                                                                              |
| 21 |              |    | (c) Explain how missing data were addressed                                                                                  |
| 22 |              |    |                                                                                                                              |
| 23 |              |    | (d) <i>Cohort study</i> —If applicable, explain how loss to follow-up was addressed                                          |
| 24 |              |    |                                                                                                                              |
| 25 |              |    | <i>Case-control study</i> —If applicable, explain how matching of cases and controls was addressed                           |
| 26 |              |    |                                                                                                                              |
| 27 |              |    | <i>Cross-sectional study</i> —If applicable, describe analytical methods taking account of sampling strategy                 |
| 28 |              |    |                                                                                                                              |
| 29 |              |    | (e) Describe any sensitivity analyses                                                                                        |
| 30 |              |    |                                                                                                                              |
| 31 |              |    |                                                                                                                              |
| 32 |              |    |                                                                                                                              |
| 33 |              |    |                                                                                                                              |
| 34 |              |    |                                                                                                                              |
| 35 |              |    |                                                                                                                              |
| 36 |              |    |                                                                                                                              |
| 37 |              |    |                                                                                                                              |
| 38 |              |    |                                                                                                                              |
| 39 |              |    |                                                                                                                              |
| 40 |              |    |                                                                                                                              |
| 41 |              |    |                                                                                                                              |
| 42 |              |    |                                                                                                                              |
| 43 |              |    |                                                                                                                              |
| 44 |              |    |                                                                                                                              |
| 45 |              |    |                                                                                                                              |
| 46 |              |    |                                                                                                                              |
| 47 |              |    |                                                                                                                              |
| 48 |              |    |                                                                                                                              |
| 49 |              |    |                                                                                                                              |
| 50 |              |    |                                                                                                                              |
| 51 |              |    |                                                                                                                              |
| 52 |              |    |                                                                                                                              |
| 53 |              |    |                                                                                                                              |
| 54 |              |    |                                                                                                                              |
| 55 |              |    |                                                                                                                              |
| 56 |              |    |                                                                                                                              |
| 57 |              |    |                                                                                                                              |
| 58 |              |    |                                                                                                                              |
| 59 |              |    |                                                                                                                              |
| 60 |              |    |                                                                                                                              |

Continued on next page

| <b>Results</b>    |     |                                                                                                                                                                                                                                                                                                                                                                                                               |                                                                                                   |
|-------------------|-----|---------------------------------------------------------------------------------------------------------------------------------------------------------------------------------------------------------------------------------------------------------------------------------------------------------------------------------------------------------------------------------------------------------------|---------------------------------------------------------------------------------------------------|
| Participants      | 5*  | (a) Report numbers of individuals at each stage of study—eg numbers potentially eligible, examined for eligibility, confirmed eligible, included in the study, completing follow-up, and analysed<br>(b) Give reasons for non-participation at each stage<br>(c) Consider use of a flow diagram                                                                                                               | NA                                                                                                |
| Descriptive data  | 14* | (a) Give characteristics of study participants (eg demographic, clinical, social) and information on exposures and potential confounders<br>(b) Indicate number of participants with missing data for each variable of interest<br>(c) <i>Cohort study</i> —Summarise follow-up time (eg, average and total amount)                                                                                           | NA                                                                                                |
| Outcome data      | 15* | <i>Cohort study</i> —Report numbers of outcome events or summary measures over time<br><i>Case-control study</i> —Report numbers in each exposure category, or summary measures of exposure<br><i>Cross-sectional study</i> —Report numbers of outcome events or summary measures                                                                                                                             | NA                                                                                                |
| Main results      | 16  | (a) Give unadjusted estimates and, if applicable, confounder-adjusted estimates and their precision (eg, 95% confidence interval). Make clear which confounders were adjusted for and why they were included<br>(b) Report category boundaries when continuous variables were categorized<br>(c) If relevant, consider translating estimates of relative risk into absolute risk for a meaningful time period | NA                                                                                                |
| Other analyses    | 17  | Report other analyses done—eg analyses of subgroups and interactions, and sensitivity analyses                                                                                                                                                                                                                                                                                                                | NA                                                                                                |
| <b>Discussion</b> |     |                                                                                                                                                                                                                                                                                                                                                                                                               |                                                                                                   |
| Key results       | 18  | Summarise key results with reference to study objectives                                                                                                                                                                                                                                                                                                                                                      | p. 9-10                                                                                           |
| Limitations       | 19  | Discuss limitations of the study, taking into account sources of potential bias or imprecision. Discuss both direction and magnitude of any potential bias                                                                                                                                                                                                                                                    | Discussion (strengths and weaknesses of the study) p.10-11                                        |
| Interpretation    | 20  | Give a cautious overall interpretation of results considering objectives, limitations, multiplicity of analyses, results from similar studies, and other relevant evidence                                                                                                                                                                                                                                    | Discussion (interpretation of findings in the context of existing research, meaning of the study: |

1  
2  
3  
4  
5  
6  
7  
8  
9  
10  
11  
12  
13  
14  
15  
16  
17  
18  
19  
20  
21  
22  
23  
24  
25  
26  
27  
28  
29  
30  
31  
32  
33  
34  
35  
36  
37  
38  
39  
40  
41  
42  
43  
44  
45  
46  
47  
48  
49  
50  
51  
52  
53  
54  
55  
56  
57  
58  
59  
60p.9-11  
implication

---

|                  |    |                                                                       |                                                                   |
|------------------|----|-----------------------------------------------------------------------|-------------------------------------------------------------------|
| Generalisability | 21 | Discuss the generalisability (external validity) of the study results | Discussion<br>(strengths and<br>weakness of the<br>study) p.10-11 |
|------------------|----|-----------------------------------------------------------------------|-------------------------------------------------------------------|

---

**Other information**


---

|         |    |                                                                                                                                                               |              |
|---------|----|---------------------------------------------------------------------------------------------------------------------------------------------------------------|--------------|
| Funding | 22 | Give the source of funding and the role of the funders for the present study and, if applicable, for the original study on which the present article is based | Funding p.12 |
|---------|----|---------------------------------------------------------------------------------------------------------------------------------------------------------------|--------------|

\*Give information separately for cases and controls in case-control studies and, if applicable, for exposed and unexposed groups in cohort and cross-sectional studies.

**Note:** An Explanation and Elaboration article discusses each checklist item and gives methodological background and published examples of transparent reporting. The STROBE checklist is best used in conjunction with this article (freely available on the Web sites of PLoS Medicine at <http://www.plosmedicine.org/>, Annals of Internal Medicine at <http://www.annals.org/>, and Epidemiology at <http://www.epidem.com/>). Information on the STROBE Initiative is available at [www.strobe-statement.org](http://www.strobe-statement.org).

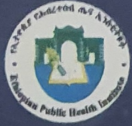

የኢትዮጵያ የሕብረተሰብ ጤና ኢንስቲትዩት  
**Ethiopian Public Health Institute**

አዲስ አበባ-ኢትዮጵያ Addis Ababa, Ethiopia

ስልክ-Tel: +251 11 2133499, +251 11 2751522, ፋክስ Fax: +251 11 2758634,

የጽሑፍ- P. O. BOX: 1242/5654 e-mail: [ephi@ethionet.et](mailto:ephi@ethionet.et)

[www.ephi.gov.et](http://www.ephi.gov.et)

ቁጥር **EPHI 6.13/233**  
 Ref. No  
 ቀን **01-04-2021**  
 Date

**EPHI-IRB Certificate of Approval**

EPHI-IRB MM No.: 076

Protocol Number: EPHI-IRB-317-2020

|                                                                        |                                                                                    |
|------------------------------------------------------------------------|------------------------------------------------------------------------------------|
| Protocol Title: Ethiopian Food and Nutrition Programs Baseline Survey. |                                                                                    |
| Primary Investigator                                                   | Dr Masresha Tessema                                                                |
| Institute:                                                             | EPHI                                                                               |
| Study site/s                                                           | Ethiopia                                                                           |
| Elements Reviewed<br>(EPHI-IRB AF 01-008/02.0):                        | <input type="checkbox"/> Attached <input checked="" type="checkbox"/> Not attached |
| Mode of Review                                                         | <input type="checkbox"/> Expedited <input checked="" type="checkbox"/> Full Board  |
| Decision of the meeting                                                | <input checked="" type="checkbox"/> Approved                                       |

- I. Elements approved:
1. Protocol Version No.: 03
  2. Protocol Version Date: 19 Mar 2021
  3. ICF Version No.: 03
  4. ICF Version Date: 19 Mar 2021

II. Obligations of the PI:

1. Should comply with the standard international & national scientific and ethical guidelines
2. All amendments and changes made in protocol and consent form needs IRB approval
3. The PI should report SAE within 48 hours of the event
4. This approval certificate is valid for only one year (specified below). The PI should Submit continuation request before expire date of approval, if project is to continue.
5. Final report/Thesis should be submitted to the IRB secretariat office (SERO) within two months following completion of the study, and Articles as soon as published

Institutional Review Board Approval Date: **16 Jan 2021**

Approval Period: **From 16 Jan 2021 to 15 Jan 2022**

Follow up report expected in:

6 months \_\_\_\_\_ 9 months \_\_\_\_\_ one year

**EPHI-IRB Chairperson**

Name & Signature *Dr. Alemsegh H. Mamo*

Date: *30/3/2021*

**EPHI Director General**

Name & Signature *[Signature]*

Date: \_\_\_\_\_

*31/03/21*  
**EPHI Director General**  
**Abba Abate (Dr)**

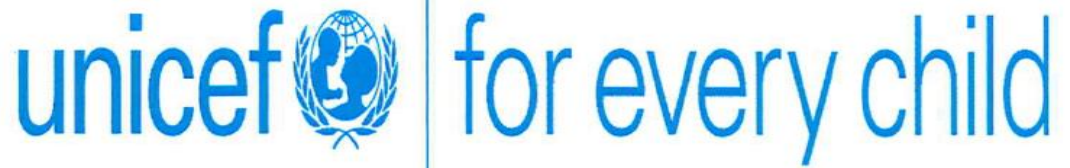

1  
2  
3  
4  
5  
6 **Ref: NUT/005/2021**  
7 **Date: February 15, 2021**  
8

9  
10  
11 **To: Ethiopian Public Health Institute (EPHI)**  
12  
13 **Addis Ababa**  
14

15  
16 **Subject: Notification of financial support for NNP II end line survey/the Ethiopian Food and Nutrition**  
17 **Strategy Baseline Survey**  
18

19  
20 As part of the Investment Project Financing (IPF) support by World Bank and signed Memorandum of  
21 Understanding with MOH and UNICEF; the National Nutrition program II end line survey which will be served  
22 as a baseline for the National Food and Nutrition Strategy will be conducted by EPHI.  
23  
24

25  
26 The objective of the baseline survey is to produce information on anthropometric status, dietary intakes, and  
27 micronutrient status of different population groups in Ethiopia, and assess the coverage of nutrition-sensitive and  
28 specific interventions.  
29

30  
31 UNICEF will be providing financial support (\$ 917,335) to EPHI to conduct Ethiopian Food and Nutrition  
32 Strategy Baseline Survey in ten regions and two city administrations and considering of raising additional  
33 mobilization of funds for the purpose.  
34

35  
36 We look forward to continuing to work with your organization as this survey moves forward.  
37  
38

39  
40  
41 **Sincerely Yours,**

42  
43 *stanley chitekwe*  
44

45 **Stanley Chitekwe,**  
46 **Chief of Nutrition**  
47 **UNICEF Ethiopia**  
48

49  
50  
51 **Active in more than 190 countries and territories through country programmes and National Committees.**  
52 **We are UNICEF, the United Nations Children's Fund.**  
53

54  
55 **UNICEF Ethiopia: Telephone +251 115 184000 Fax +251 115 511628 Email [ethcommunication@unicef.org](mailto:ethcommunication@unicef.org) Website**  
56 **[www.unicef.org/ethiopia](http://www.unicef.org/ethiopia)**  
57

Date: 15 February 2021

Ref. No: 01799/GAIN/ET

EPHI, IRB Office  
Addis Ababa

**Subject: Letter of confirmation**

This letter is in response to your request on financial and technical support concerning Food and Nutrition program baseline survey. We would like to confirm that GAIN is happy to support this important initiative.

GAIN's support on Food and Nutrition program bassline survey includes the following:

- Financing field supplies for the biomarkers collection.
- Hiring a food consumption survey assistant and
- Assigning two experts from Global and local GAIN office to provide technical support.

Looking forward to a continued fruitful collaboration.

Kind regards,



Thomas Haverkort  
Country Director

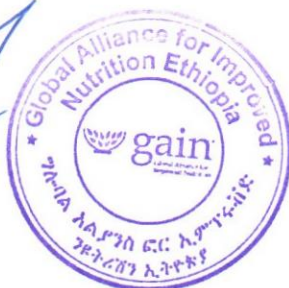

# BMJ Open

## Ethiopia National Food and Nutrition Survey to inform the Ethiopian Food and Nutrition Strategy: A study protocol

|                                 |                                                                                                                                                                                                                                                                                                                                                                                                                                                                                                                                                                                                                                                                                                                                                                                                                                                                                                                                                                                                          |
|---------------------------------|----------------------------------------------------------------------------------------------------------------------------------------------------------------------------------------------------------------------------------------------------------------------------------------------------------------------------------------------------------------------------------------------------------------------------------------------------------------------------------------------------------------------------------------------------------------------------------------------------------------------------------------------------------------------------------------------------------------------------------------------------------------------------------------------------------------------------------------------------------------------------------------------------------------------------------------------------------------------------------------------------------|
| Journal:                        | <i>BMJ Open</i>                                                                                                                                                                                                                                                                                                                                                                                                                                                                                                                                                                                                                                                                                                                                                                                                                                                                                                                                                                                          |
| Manuscript ID                   | bmjopen-2022-067641.R1                                                                                                                                                                                                                                                                                                                                                                                                                                                                                                                                                                                                                                                                                                                                                                                                                                                                                                                                                                                   |
| Article Type:                   | Protocol                                                                                                                                                                                                                                                                                                                                                                                                                                                                                                                                                                                                                                                                                                                                                                                                                                                                                                                                                                                                 |
| Date Submitted by the Author:   | 23-Feb-2023                                                                                                                                                                                                                                                                                                                                                                                                                                                                                                                                                                                                                                                                                                                                                                                                                                                                                                                                                                                              |
| Complete List of Authors:       | <p>Woldeyohannes, Meseret ; Ethiopian Public Health Institute<br/> Girma, Meron; Ethiopian Public Health Institute, National Information Platforms for Nutrition<br/> Petros, Alemnesh; Ethiopian Public Health Institute<br/> Hussen, Alemayehu ; Ethiopian Public Health Institute<br/> Samuel, Aregash; Ethiopian Public Health Institute<br/> Dinsa, Danial ; Ethiopian Public Health Institute, Environmental and Public Health Research<br/> Challa, Feyissa; Ethiopian Public Health Institute<br/> Laillou, Arnaud; UNICEF, Dakar, Senegal<br/> Chitekwe, Stanley; UNICEF Ethiopia<br/> Baye, Kaleab ; Addis Ababa University,<br/> Noor , Ramadhani; UNICEF Ethiopia<br/> Donze, Anne Sophie; UNICEF Ethiopia<br/> Tollera, Getachew; Ethiopian Public Health Institute<br/> Dangiso, Mesay; Ethiopian Public Health Institute<br/> Tadesse, Lia; Ethiopia Ministry of Health<br/> Zelalem, Meseret; Ethiopia Ministry of Health<br/> Tessema, Masresha; Ethiopian Public Health Institute,</p> |
| <b>Primary Subject Heading</b>: | Public health                                                                                                                                                                                                                                                                                                                                                                                                                                                                                                                                                                                                                                                                                                                                                                                                                                                                                                                                                                                            |
| Secondary Subject Heading:      | Epidemiology                                                                                                                                                                                                                                                                                                                                                                                                                                                                                                                                                                                                                                                                                                                                                                                                                                                                                                                                                                                             |
| Keywords:                       | EPIDEMIOLOGY, NUTRITION & DIETETICS, PUBLIC HEALTH                                                                                                                                                                                                                                                                                                                                                                                                                                                                                                                                                                                                                                                                                                                                                                                                                                                                                                                                                       |
|                                 |                                                                                                                                                                                                                                                                                                                                                                                                                                                                                                                                                                                                                                                                                                                                                                                                                                                                                                                                                                                                          |

SCHOLARONE™  
Manuscripts

# Ethiopia National Food and Nutrition Survey to Inform the Ethiopian Food and Nutrition

## Strategy: A Study Protocol

Meseret Woldeyohannes<sup>1</sup>, Meron Girma<sup>1</sup>, Alemnesh Petros<sup>1</sup>, Alemayehu Hussen<sup>1</sup>, Aregash Samuel<sup>1</sup>, Daniel Abera Dinssa<sup>1</sup>, Feyissa Challa<sup>1</sup>, Arnaud Laillou<sup>2</sup>, Stanley Chitekwe<sup>3</sup>, Kaleab Baye<sup>4</sup>, Ramadhani Noor<sup>3</sup>, Anne Sophie Donze<sup>3</sup>, Getachew Tollera<sup>1</sup>, Mesay Hailu Dangiso<sup>1</sup>, Lia Tadesse<sup>5</sup>, Meseret Zelalem<sup>5</sup>, Masresha Tessema<sup>1\*</sup>

<sup>1</sup> Ethiopian Public Health Institute, Addis Ababa, Ethiopia

<sup>2</sup> Regional Nutrition Specialist, United Nations Children's Fund (UNICEF) Regional Office, Dakar, Senegal

<sup>3</sup> United Nations Children's Fund (UNICEF), Addis Ababa 12000, Ethiopia

<sup>4</sup> Center for Food Science and Nutrition, Addis Ababa University, Addis Ababa 12000, Ethiopia

<sup>5</sup> Ethiopian Ministry of Health, Addis Ababa, Ethiopia

\*Correspondence: Masresha Tessema, P.O.Box 1242 Ethiopian Public Health Institute, dr.masresha.tessema@gmail.com

Running title: National Food and Nutrition Strategy Survey



## 22 ABSTRACT

23 **Introduction** Ethiopia has made significant progress in reducing malnutrition in the past two decades.  
24 Despite such improvements, a substantial segment of the country's population remains chronically  
25 undernourished and suffers from not only micronutrient deficiencies but also from increasing diet-  
26 related non-communicable diseases such as diabetics, hypertension and cancer. This survey aims to  
27 assess the anthropometric status, dietary intake and micronutrient status of Ethiopian children, women,  
28 and adolescent girls. The study will also assess the coverage of direct and indirect nutrition-related  
29 interventions, and map agricultural soil nutrients. The survey will serve as a baseline for the recently  
30 developed Ethiopian food system transformation plan and will inform the implementation of the National  
31 Food and Nutrition Strategy.

32 **Methods and analysis** A population-based cross-sectional survey, the study will collect data in the ten  
33 regions and two city administrations of Ethiopia. The study population will be women of reproductive  
34 age, children aged 0-59 months, school-aged children and adolescent girls. A total of 16,596 households  
35 will be surveyed, allowing us to generate national and regional estimates for selected indicators. A two-  
36 stage stratified cluster sampling procedure will be used to select households. In the first stage, 639  
37 enumeration areas will be selected using probability-proportional to size allocation. In the second stage  
38 26 eligible households will be selected within each enumeration area using systematic random selection.  
39 Primary outcomes include coverage of direct and indirect nutrition interventions, infant and young child  
40 feeding practices, food insecurity, dietary intakes, mental health of women and children, anthropometric  
41 status, micronutrient status, and soil nutrient status.

42 **Ethics and dissemination** A protocol was full reviewed and approved by the Institutional Review Board of  
43 the Ethiopian Public Health Institute (protocol no: EPHI-IRB-317-2020). The finding of this survey will be  
44 disseminated in scientific forums, national research conference, and will be submitted for publication in  
45 peer reviewed journals.

### 46 **Strengths and limitations of this study**

- 47     ▪ The survey covered a large geographic area and collect data on anthropometric status, 24hr  
48     recall quantitative dietary intakes and the determination of micronutrient status in the same  
49     participants or household, while at the same time capturing data on the food system in Ethiopia.
- 50     ▪ The study will help to improve understanding of nutritional problem across multiple facets—from  
51     agricultural soil to people to the environment in Ethiopia.
- 52     ▪ Inherent to the cross-sectional design of the study, the findings of this study cannot be used to  
53     establish cause and effect.
- 54     ▪ The study design prevents us from considering seasonal differences in nutritional outcomes and  
55     determinants.

## 59 INTRODUCTION

60 Globally, one in every three population are affected by one of more forms of malnutrition.<sup>1</sup> Women and  
61 children are particularly vulnerable to malnutrition due to increased physiological nutrient needs  
62 required to support fetal and child growth.<sup>2</sup> Nutritional deprivation during early life impairs growth and  
63 development, leading to poor school performance, reduced productivity, and loss of earnings in later  
64 life.<sup>3</sup> Consequently, the first 1000 days of life, from conception to the child's second year of life, was  
65 recognized as a critical window of opportunity to effectively prevent malnutrition.<sup>3 4</sup> Adolescence is also  
66 identified as a second window of opportunity to correct nutritional inadequacies and adversities faced in  
67 early life, but little is known about this life stage.

68 Despite significant progress over the past two decades, the burden of malnutrition in Ethiopia  
69 remains high.<sup>5-7</sup> Nationally, 37% of Ethiopian children under five years of age are stunted<sup>7</sup>, and 22% of  
70 women of reproductive age (WRA) are chronically undernourished (Body Mass Index (BMI) < 18.5  
71 Kg/m<sup>2</sup>).<sup>5</sup> Only 14% of children under two years of age consumed the minimum number of recommended  
72 food groups.<sup>5</sup> Furthermore, micronutrient deficiencies co-exist with chronic energy deficiency.<sup>8</sup> This along  
73 with the ongoing nutrition transition, characterized by shifts in diets<sup>9</sup>, is further complicating the  
74 nutrition landscape by increasing the prevalence of overweight and non-communicable diseases.<sup>5</sup> Nearly  
75 a fifth (16%) of Ethiopian adults are estimated to be hypertensive, and 3% are diabetic.<sup>10</sup> Therefore,  
76 addressing not only undernutrition but all forms of malnutrition is critical.

77 The Sustainable Development Goals (SDGs) recognize the importance of nutrition, primarily  
78 driven by the need to mitigate its detrimental consequences. Further, the 2012 World Health Assembly  
79 (WHA) identified global targets to be achieved by 2025 that aim to reduce stunting, anemia, low birth  
80 weight, and childhood obesity. These targets are used to track progress in SDG goal 2: Zero  
81 hunger.<sup>11</sup> Recognizing the importance of good nutrition, the Government of Ethiopia has made ending  
82 malnutrition a national priority. Ethiopia started implementing its first National Nutrition Program in  
83 2008.<sup>12</sup> The second phase of this program (2011-2016) was a multisectoral program aimed at accelerating  
84 progress in reducing malnutrition.<sup>13</sup> Moreover, Ethiopia's first Food and Nutrition Policy was endorsed in  
85 2018<sup>14</sup>, followed the National Food and Nutrition Strategy (FNS)<sup>15</sup> which was launched in 2021 to provide  
86 a framework for the operationalization of the policy. Acceleration of progress in the reduction of  
87 malnutrition requires the design and implementation of direct and indirect nutrition interventions that  
88 can be implemented at scale. To this end, understanding the various factors contributing to the different  
89 forms of malnutrition is critical.

90 Multiple factors operating at the immediate, underlying, and basic levels contribute to  
91 malnutrition.<sup>2</sup> Inadequate dietary intake and poor health are immediate determinants.<sup>2</sup> Household food  
92 security, child care practices, access to health services, and healthy environments are underlying  
93 determinants.<sup>16</sup> Structural and contextual factors such as economic structures, political, environmental,  
94 social and cultural factors are the basic determinants of malnutrition.<sup>2</sup> The contribution of these factors  
95 varies across different contexts, and target groups, but studies capturing all these factors in a single  
96 survey are scant. The lack of timely and comprehensive information on nutritional status across critical  
97 life stages and their determinants is a bottleneck that is preventing Ethiopia from designing effective  
98 interventions. Up to date and comprehensive data on the coverage of direct and indirect nutrition

99 interventions delivered across various implementing sectors of the food and nutrition strategy is not  
100 available yet. This is unfortunate as such data could inform the implementation of the food and nutrition  
101 strategy, but also serve as a baseline to which progress can be tracked against.

102 Therefore, this study aimed to provide the first ever comprehensive information on the  
103 nutritional status of different populations in Ethiopia to support evidence-based implementation of the  
104 national food and nutrition strategy.

### 105 **Objectives of the survey**

106 The overall goal of this study is to produce nationally and regionally representative estimates on  
107 anthropometric status, coverage of nutrition interventions, dietary intakes, and micronutrient status for  
108 children, adolescent girls, and women of reproductive age in Ethiopia.

109 Specific objectives include;

- 110 1. Assess the coverage of direct and indirect nutrition interventions.
- 111 2. Assess food consumption patterns and nutrients intakes of children aged 6–59 months, and  
112 women of reproductive age.
- 113 3. Assess the micronutrient status of children (vitamin A, anemia, iron, iodine and zinc),  
114 adolescent girls, and women of reproductive age (vitamin A, vitamin D, anemia, iron, iodine,  
115 zinc, folate, vitamin B<sub>12</sub>)
- 116 4. Assess the anthropometric status of under-5 children, school-age children (6-12 years),  
117 adolescent girls, and women of reproductive age.
- 118 5. Assess the geographical distribution of soil micronutrient status in Ethiopian agricultural soil.

### 119 **METHODS AND ANALYSIS**

#### 120 **Study design**

121 This study is a nationally and sub-nationally (regionally) representative cross-sectional survey that will  
122 characterize dietary intake, micronutrient status, and access to nutrition-related services for different  
123 target populations. Given that soil nutrient content can influence micronutrient content of foods and  
124 hence affect nutrient intake, the soil nutrient composition will also be analyzed. The study will have four  
125 main components. The first component will assess nutrition-specific and nutrition-sensitive indicators  
126 (NSS) for all target groups (children aged 0-59 months and WRA, school-age children, adolescent  
127 girls) using semi-structured questionnaires. The second component will measure quantitative dietary  
128 intake for children aged 6-59 months and WRA (15-49 years). The third component of the survey will  
129 collect biomarker samples from all children (6-59 months), school-age children (6-12 years), adolescent  
130 girls (10-19 years), and WRA (15-49 years). The final component of the study will measure micronutrients  
131 in agricultural soils. The study data will be collected from July 2021 to December 2022.

#### 132 **Study setting**

133 Ethiopia has an estimated population size of 120 million and is the second most populous country in  
134 Africa.<sup>17</sup> The majority of its population resides in rural areas (70%).<sup>17</sup> Agriculture accounts for 40% of the  
135 country's gross domestic product.<sup>17</sup> Children aged 15 years and younger make up 40% of the Ethiopian  
136 population in 2021.<sup>18</sup> Ethiopia is administratively divided into 10 regions and two city administrations.  
137 This study will be conducted in all of the regions and city administrations of the country. Figure 1  
138 provides a geographic representation of the study areas.

### 139 **Study participants**

140 The target population of this study are i) women of reproductive age (WRA) aged 15-49 years ii) children  
141 aged 0-59 months iii) school age children aged 6-12 years, and iv) adolescent girls aged 10-19 years, and  
142 v) household head.

### 143 **Sample size calculations**

144 Sample size was estimated to guarantee adequate precision to generate national and regional estimates  
145 for selected indicators for each study target group. Indicators used for each target group are shown in  
146 Table 1S in supplemental materials. The required number of households and target groups was calculated  
147 using a single population proportion formula at the regional level. We used region-specific prevalence  
148 estimates for indicators, a 5% margin-of-error, a design effect of 1.5, a household response rate of 95%,  
149 and an individual response rate of 80%. The initial sample size was then adjusted for region-specific  
150 average household size and percentage of the target population from the total population. An indicator  
151 that provides the maximum number of households was used to estimate the final sample size for each  
152 region. Regional sample sizes were summed up to derive the total (national) sample size. Based on these  
153 calculations, the total sample size for the overall survey was 16,596 households (Supplemental table 2S).

154 For WRA, dietary and biomarker data will be collected in half of the selected households within  
155 each Enumeration Area (EA). This selection will yield a total sample size of 7,386 WRA (50% of the  
156 expected 14,772 WRA). The sample size needed to assess dietary intakes and micronutrient status of  
157 WRA was calculated using the prevalence of inadequate zinc intake, which yielded the largest sample  
158 size.<sup>8,19</sup>

### 159 **Sampling procedures**

160 A two-stage stratified cluster sampling procedure will be used to select households. In the first stage, 639  
161 EAs, 257 urban and 382 rural will be selected using probability-proportional to-size allocation. We will use  
162 the 2018 Ethiopia Population and Housing Census enumeration areas sampling frame to select EAs (the  
163 Primary Sampling Units (PSUs)). The Central Statistical Agency (CSA) prepared the enumeration areas  
164 sampling frame. An EA typically contains 100-150 households. EA maps will be used to delineate the  
165 boundaries of the selected EA. In the second stage of sampling to identify eligible households, all  
166 households with the EA will be listed. A household will be eligible for selection if at least one of the study  
167 target groups are residents (de jure) or stayed at the household the night before the interview (de  
168 factor).

169 Twenty-six (26) eligible households will be selected within each EA using systematic random  
170 selection. All target groups will be eligible for the NSS interview in the selected households. All children  
171 aged 6-59 months will also be eligible for dietary assessment. Women residing in 13 households (Out of  
172 26 households) who will be selected randomly will be eligible for dietary assessment. Biomarker samples  
173 will be collected for all children under 5 years of age, school-age children, and adolescents in the selected  
174 households. Similar to dietary assessment, biomarker samples will be collected for women residing in half  
175 of the selected households (figure 2).

176

177

## 178 **Outcomes**

### 179 **Coverage of direct and indirect nutrition interventions**

180 A structured questionnaire will be used to determine the coverage of direct and indirect nutrition  
181 interventions provided to children aged 6-59 months, WRA, and adolescent girls. Direct nutrition  
182 interventions included vitamin A supplementation, iron supplementation, zinc supplementation, growth  
183 monitoring and promotion, nutrition counseling services, and food fortification. Water, sanitation and  
184 hygiene, coverage of food or cash assistance program, women empowerment, and mental health will be  
185 some nutrition-sensitive indicators considered in this study (table 1). We will use standard indicator  
186 definitions proposed by the Data for Decisions to Expand Nutrition Transformation project (DataDENT) to  
187 assess coverage of nutrition programs.

### 188 **Anthropometric status**

189 Using standardized procedures, anthropometric measurements, including weight, height/length, and  
190 mid-upper arm circumference, will be taken for all study target populations.<sup>20</sup> Anthropometric indices  
191 (weight-for-height z-scores, length/height-for-age z-scores, weight-for-age z-scores, BMI-for-age z-scores)  
192 will be calculated using the WHO 2006 child growth standards and the WHO 2007 child growth reference  
193 data. Stunting (length/height-for-age z-scores below -2 SD), wasting (weight-for-height z-scores below -2  
194 SD), underweight (weight-for-age z-scores below -2 SD), thinness (BMI-for-age z-scores below -2 SD) and  
195 BMI will be the primary anthropometric outcomes of interest.

### 196 **Infant and young child feeding practices**

197 Infant and young child feeding practices will be assessed using the new World Health Organization (WHO)  
198 and United Nations Children's Fund (UNICEF) recommended 17 indicators to evaluate IYCF practices.<sup>21</sup>

### 199 **Food insecurity**

200 The Food Insecurity Experience Scale (FIES) will be used to assess household food security.<sup>22</sup> The FIES  
201 consists of eight questions that assess household experience related to adequate food access. Experience  
202 questions range from worrying about getting enough food to not eating for a whole day.

203 In addition to these outcome indicators, information on the sociodemographic characteristic of  
204 households, child health, maternal health, employment status, and household agricultural practices will  
205 be collected using structured questionnaires.

### 206 **Mental health of women**

207 Common mental health disorders will be assessed using the WHO Self-reporting questionnaire which  
208 consists of 20 questions. Women will be classified as having a common mental health disorder if row  
209 score was greater or equal to 6 out of 20.<sup>23</sup>

### 210 **Assessment of dietary intakes of children and WRA**

211 We will measure dietary intake for children aged 6-59 months and WRA. A one-day quantitative multiple-  
212 pass 24-hour recall will be conducted to assess dietary intakes. The interactive multiple-pass 24-hour  
213 recall interview consists of four steps designed to enhance memory.<sup>24</sup> All days of the week will be  
214 proportionately represented during the dietary survey to account for the day of the week effects on food

215 intake. To account for the day-to-day variability of dietary intake within individuals, a second non-  
 216 consecutive day 24-hr recall (repeat) will be collected (within 2 to 10 days of the first recall) on a  
 217 randomly selected sub-sample of WRA and children. The number of repeats needed is determined by  
 218 allocating for each region 50 repeats, which is then multiplied by a design effect of 1.5 and a 10% non-  
 219 response rate. The number of repeats was rounded up to 1244 recalls for each target group to ensure  
 220 that the minimum number of repeats (n=83) needed from each region would be collected. Detailed non-  
 221 standard recipe ingredient data will be collected for all mixed dishes that were prepared at home.

222 We will use 15 food groups to assess dietary intakes of women (15-49 months) and children aged  
 223 24-59 months. These food groups were: 1) Cereals and their products, 2) Starchy Roots and tubers, and  
 224 their products, 3) Pulses, and their products, 4) Vegetables and their products, 5) Fruits and their  
 225 products, 6) Meat, and poultry their products, 7) Eggs and their products, 8) Fish, shellfish and their  
 226 products, 9) Milk and milk products, 10) Fats and oils, 11) Nuts and seeds, 12) Sugar and sweetened  
 227 products, 13) Beverages, 14) Spices and condiments, and 15) Miscellaneous. For children aged 6-23  
 228 months we will use the updated WHO, UNICEF food groups: 1) Breastmilk, 2) Grains, roots and tubers, 3)  
 229 Pulses, nuts and seeds, 4) Dairy products, 5) Flesh foods (meats, fish, poultry, organ meats), 6) Eggs 7)  
 230 Vitamin-A rich fruits and vegetables, and 8) other fruits and vegetables.

231 ***Dietary assessment pre-survey work:*** We carried out pre-survey work to aid dietary data collection  
 232 following recommendation set by the Intake: Center for Dietary Assessment.<sup>25 26</sup> An initial step was  
 233 developing a food and ingredient list containing a comprehensive list of food items, mixed dishes, and  
 234 ingredients expected to be consumed by the study target groups. The food list was generated using data  
 235 from the first 2011 Ethiopian National Food Consumption Survey.<sup>19</sup> Other common foods consumed  
 236 across the regions in Ethiopia were derived from the 2016 Household Income and Expenditure Surveys,<sup>27</sup>  
 237 the Ethiopian Food Composition Tables, and dietary intake data from other recent dietary assessment  
 238 surveys conducted by the Ethiopian Public Health Institute (EPHI). Portion size estimation methods  
 239 suitable for large-scale studies were pre-selected for use in the survey following Intake  
 240 recommendations.<sup>28</sup> The selected methods were direct measurement of actual foods consumed,  
 241 standard unit: size and number, proxy measurement using play dough, water, rice, and maize flour, and  
 242 finally using food price to estimate the amount of food consumed. Portion size estimation methods were  
 243 assigned for all foods included in the food list.

244 **Table 1.** Nutrition-direct and nutrition-indirect interventions coverage

| No                                              | Indicator                                                                                        | Target population          |
|-------------------------------------------------|--------------------------------------------------------------------------------------------------|----------------------------|
| <b>Nutrition indirect intervention coverage</b> |                                                                                                  |                            |
| <i>Child interventions</i>                      |                                                                                                  |                            |
| 1.                                              | Children received iron tablets/syrup in the last 12 months                                       | Children aged 6-59 months  |
| 2.                                              | Children received vitamin A supplements in past 6 months                                         | Children aged 6-59 months  |
| 3.                                              | Children received deworming tablets in the past 6 months                                         | Children aged 24-59 months |
| 4.                                              | All 8 basic vaccinations: one dose of BCG, three doses of DPT, three doses of the polio vaccine, | Children aged 9-59 months  |

|     |                                                                                                |                                                                                        |
|-----|------------------------------------------------------------------------------------------------|----------------------------------------------------------------------------------------|
|     | and one dose of the measles vaccine                                                            |                                                                                        |
| 5.  | No Vaccination                                                                                 | Children aged 0-59 months                                                              |
|     | <i>Growth monitoring</i>                                                                       |                                                                                        |
| 6.  | Weight measured in the last 3 months                                                           | Children aged 0-23 months                                                              |
| 7.  | Height measured in the last 3 months (Optional)                                                | Children aged 0-23 months                                                              |
| 8.  | MUAC measured in the last 3 months (Optional)                                                  | Children aged 0-23 months                                                              |
|     | <i>Infant and young child feeding (IYCF) counselling</i>                                       |                                                                                        |
| 9.  | Mothers with children 6-23 months received any IYCF counseling                                 | Children aged 6-23 months                                                              |
| 10. | Mothers with children 6-23 months received age-appropriate IYCF counseling                     | Children aged 6-23 months                                                              |
|     | <i>Early breast-feeding counseling</i>                                                         |                                                                                        |
| 11. | Women received breastfeeding counseling with observation during the first two days after birth | Women aged 15-49 years with a live birth in the past 5 years for the most recent birth |
| 12. | Women received breastfeeding counseling during the first month after birth                     | Women aged 15-49 years with a live birth in the past 5 years for the most recent birth |
|     | <i>Coverage of Nutritional Interventions during pregnancy/antenatal Care (ANC)</i>             |                                                                                        |
| 13. | Percentage of women who had 4 or more ANC visits for the most recent birth                     | Women aged 15-49 years with a birth in the last 5 years                                |
| 14. | Percentage of women who received counseling about healthy eating during pregnancy              | Women aged 15-49 years who received antenatal care for their most recent birth         |
| 15. | Percentage of women whose weight gain was monitored during pregnancy                           | Women aged 15-49 years who received antenatal care for their most recent birth         |
| 16. | Women received food or cash assistance during pregnancy                                        | Women aged 15-49 years with a birth in the last 5 years                                |
| 17. | Women took 90+ iron/folate tablets during pregnancy                                            | Women aged 15-49 years with a live birth in the past 5 years for the most recent birth |
| 18. | Women received deworming tablets during pregnancy                                              | Women aged 15-49 years with a live birth in the past 5 years for the most recent birth |
|     | <b>Nutrition indirect intervention coverage</b>                                                |                                                                                        |
| 19. | Basic water services                                                                           | Household                                                                              |
| 20. | Basic hygiene services                                                                         | Household                                                                              |
| 21. | Basic Sanitation services                                                                      | Household                                                                              |
| 22. | Food insecurity (not a service hence no coverage)                                              | Household                                                                              |
| 23. | Women received food or cash assistance during pregnancy                                        | Women aged 15-49 years with a live birth in the past 5 years for the most recent birth |
| 24. | Basic water services                                                                           | Household                                                                              |
| 25. | Basic hygiene services                                                                         | Household                                                                              |
| 26. | Basic Sanitation services                                                                      | Household                                                                              |
| 27. | Presence of common mental health disorders in                                                  | Women aged 15-49 years                                                                 |

|     |                                         |                        |
|-----|-----------------------------------------|------------------------|
|     | the past month                          |                        |
| 28. | Women empowerment                       | Women aged 15-49 years |
| 29. | Livestock ownership                     | Household              |
| 30  | Agricultural productivity by food group | Household              |

#### 245 **Assessment of micronutrient status:**

246 Blood specimens will be collected from the study population to determine serum retinol, ferritin, soluble  
 247 transferrin receptor (sTfR), zinc, folate, vitamin B12, red blood cell (RBC) folate and 25-hydroxyvitamin D.  
 248 Additionally, markers of inflammation, alpha(1)-acid glycoprotein (AGP), high-sensitivity C-reactive  
 249 protein (hsCRP) will also be measured. We will also analyze parasites from stool specimens. All  
 250 laboratory analyses will be performed at the EPHI Clinical chemistry, and Food Science and Nutrition  
 251 Laboratories. Both laboratories participate in an external quality assessment scheme and are accredited  
 252 by the Ethiopian National Accreditation Office (ENAO). Collection, storage, and analytical procedures for  
 253 blood, urine, stool, and salt samples are described below. The details of each biomarker analysis are  
 254 described in Supplemental Material 1-11.

255 **Blood sample collection and analysis:** Venous blood samples (5-7 mL) will be collected using vacutainer  
 256 tubes following standard operating procedures.<sup>29</sup> Trace mineral-free vacutainer tubes will be used to  
 257 collect blood for trace metal analysis. After collection, blood samples will be allowed to clot for 30  
 258 minutes in cold boxes (<8 °c). Samples will then be centrifuged at 3000 rpm (revolution per minute) for  
 259 10 minutes. The separated serum will be aliquoted and stored in -20°C portable freezers in the field.  
 260 Samples will then be transported to EPHI and stored at -80°C until analysis. Hemoglobin will be measured  
 261 in the field using Hemocue® (Hb 301, Hemocue AB, Angelholm, Sweden)<sup>30,30</sup> If the hemoglobin values are  
 262 below WHO cutoff point(11g/dl), the phlebotomist will send whole blood samples to the EPHI laboratory  
 263 to identify hemoglobinopathies using electrophoresis method.<sup>31</sup> Malaria test will be conducted on-site  
 264 using Bioline™ Malaria Ag P.f rapid diagnostic test kits (RDT) for *P. falciparum* and *P. vivax*).<sup>32</sup> Serum  
 265 soluble transferrin receptor (sTfR), AGP, hsCRP, folate, red blood cell (RBC) folate, vitamin B<sub>12</sub>, and ferritin  
 266 will be measured using Cobas 6000 analyzer (Roche Diagnostics GmbH, Mannheim, Germany). Serum  
 267 retinol will be measured using high-performance liquid chromatography (HPLC) method<sup>32</sup>, and serum zinc  
 268 and selenium will be measured using a microwave plasma atomic emission spectrometers (MP-AES)  
 269 analyzer.

270 **Stool and urine sample collection and analysis:** Stool samples will be collected using stool cups and  
 271 stored in 10 % formalin to preserve the parasite until analysis.<sup>33</sup> A portion of each stool sample will be  
 272 used to detect direct ova, larvae and cysts of intestine parasites using formal ether concentration  
 273 technique.<sup>34</sup>Urine samples will be collected from WRA and school-age children using 60 ml urine cup  
 274 containers. Samples will be stored at -20°C. Urinary iodine excretion will be assessed by Sandell Kolthoff  
 275 reaction at EPHI Laboratory using Shimadzu 1800 UV-Vis spectroscopy.<sup>35</sup>

276 **Salt collection and analysis:** Salt samples will be collected from households with WRA for whom dietary  
 277 data will be collected. At least 25 grams (one coffee cup) of salt will be collected to determine iodine  
 278 content using the iodometric titration method.<sup>36</sup>

279



### 280 **Assessment of nutrients in the soil**

281 Soil samples will be collected from three households in each EA. Zig-zag or cross sampling method will be  
282 used to collect 10 to 20 subsamples (0-30 cm depth) constituting one composite sample. Subsamples will  
283 be collected at a separation distance of five meters. After thoroughly mixing composite samples, 1 kg soil  
284 sample will be transferred to polyethylene bags. The collected soil samples will be air-dried in wooden  
285 trays and disaggregated using a ceramic mortar and pestle (soil grinder) at the EPHI soil laboratory.  
286 Samples will then pass through a 6 mm sieve of stainless-steel screens to remove debris and homogenize  
287 the soil sample. The sieved fraction will be further pulverized to pass through a 1 mm sieve for the  
288 micronutrient analysis. Soil zinc, iron, copper, and manganese will be determined following standard  
289 procedures.<sup>37</sup> Micronutrient content will be determined using inductively coupled plasma-optical  
290 emission spectroscopy (ICP-OES) after extraction with diethylene triamine penta acetic acid (DPTA).  
291 Additional variables that affect the mobility of micronutrients in the soil and their uptake into crops will  
292 also be measured. These variables include soil reaction (pH), electrical conductivity, organic matter, total  
293 nitrogen, and soil organic carbon content. Data collectors will also record topography, slope, cropping  
294 history, type, and fertilizer application information. Table 2 provides a summary of procedures for each of  
295 the four components of the survey by study target groups.

296

297

298

299 **Table 2.** Summary of data collection procedures for each of the four components of the survey

|                                                                         | Child<br>0-5<br>months | Child<br>6-23<br>months | Child<br>24-59<br>months | School<br>children<br>6-12 years | Adolescent<br>girls<br>10-19 years | WRA<br>15-49<br>years | Household |
|-------------------------------------------------------------------------|------------------------|-------------------------|--------------------------|----------------------------------|------------------------------------|-----------------------|-----------|
| <b>Nutrition direct and nutrition indirect interventions indicators</b> |                        |                         |                          |                                  |                                    |                       |           |
| Infant and young child feeding practices                                | X                      | X                       |                          |                                  |                                    |                       |           |
| Nutritional information for adolescent girls                            |                        |                         |                          |                                  | X                                  |                       |           |
| Food insecurity                                                         |                        |                         |                          |                                  |                                    |                       | X         |
| Water, sanitation and hygiene practices                                 |                        |                         |                          |                                  |                                    |                       | X         |
| Coverage of food fortification                                          |                        |                         |                          |                                  |                                    |                       | X         |
| Agricultural practices                                                  |                        |                         |                          |                                  |                                    |                       | X         |
| Mental health                                                           |                        |                         |                          |                                  |                                    | X                     |           |
| Anthropometric status                                                   | X                      | X                       | X                        |                                  | X                                  | X                     |           |
| <b>Dietary assessment</b>                                               |                        |                         |                          |                                  |                                    |                       |           |
| 24-hr recall quantitative dietary intake                                |                        | X                       | X                        |                                  |                                    | X                     |           |
| <b>Assessment of biomarker status</b>                                   |                        |                         |                          |                                  |                                    |                       |           |
| Blood sample                                                            |                        | X                       | X                        | X                                | X                                  | X                     |           |
| Urine sample                                                            |                        |                         |                          | X                                |                                    | X                     |           |
| Stool sample                                                            |                        | X                       | X                        | X                                | X                                  | X                     |           |
| Salt sample collection                                                  |                        |                         |                          |                                  |                                    |                       | X         |
| <b>Assessment of micronutrients in the Soil</b>                         |                        |                         |                          |                                  |                                    |                       |           |
| Soil micronutrient assessment                                           |                        |                         |                          |                                  |                                    |                       | X         |

300

## Data quality assurance and analysis

Training of trainers on components of the survey was held before training the data collectors and supervisors. After fifteen days of training on methodological procedures, questionnaires and quality assurance, the questionnaires were tested in a pilot group (in EAs not included in the actual survey), and adapted based on the received feedback from the survey team. The questionnaires (including the food list) were translated into local languages (Amharic, Oromifa, Tigrigna, Somali, and Afar) and back-translated to English to ensure the quality of the translation. The data collectors' measurements were standardized to ensure that the inter-observer variability was within tolerable limits. Supervisors received additional training on teamwork and on monitoring and supervising the data collection process. All data collection tools are programmed using open-source software (ODK) (Supplemental Material 12). Data quality checks were included during ODK programming to prevent data recording errors. These include restricted responses, filter insert choices, skip patterns, and defaults. During data collection daily data tracking forms will be completed to track completed surveys for each study components to prevent missing data. Before the start of the survey high frequency checks were identified and error tracking forms were designed to track data quality in real-time. These checks included completeness checks, target group tracking, and duplicate ID check. Random field-supervision visits will also be made to check data quality. Every day, collected data will be sent to the EPHI central server and imported into statistical software programs as comma-separated values (CSV) files. For laboratory analysis, a quality control chart will be used to ensure the internal and external quality control materials are in the acceptable range.

The primary data analysis will focus on computing frequencies and percentages for categorical variables and summary statistics (like means, medians SD, IQR) for summarizing continuous variables. Sample weights will be constructed based on the selection probabilities of EAs, eligible households, and non-response rates. All analyses will also be adjusted for the survey design. Additional subgroup analysis will be computed for variables with adequate sample sizes for each category. The Biomarkers Reflecting Inflammation and Nutrition Determinants of Anemia (BRINDA) Working Group's regression correction approach will be used to account for inflammation in the study of all micronutrients status using the biomarkers C-reactive protein (CRP) and AGP. Geostatistical analyses will be employed to determine the spatial patterns of micronutrient distribution in the soil and blood samples. The wealth index will be constructed using principal component analysis (PCA).<sup>38</sup> The Rasch model will be used to construct the Food Insecurity Experience Scale (FIES).<sup>22</sup> All analysis will be done using STATA 16 and ArcGIS/QGIS. Anthropometric indices will be calculated using the WHO Anthro software for under five children and WHO AnthroPlus software for adolescent.

## Patient and public involvement statement

None

## Ethics and dissemination

The study protocol is approved by the Institutional Review Board of the Ethiopian Public Health Institute (protocol no: EPHI-IRB-317-2020). Written informed consent will be obtained from each respondent and participants may withdraw at any time (supplemental Material 13). Confidentiality of all

1  
2  
3 collected data will be given high priority during each stage of data handling. Individual names and  
4 personal information of respondents will be kept confidential and data sets will be kept anonymous for  
5 analysis.  
6

7  
8 The study's findings will be disseminated through several communication channels, including  
9 stakeholder workshops, various local and International conferences and technical report. Additionally,  
10 the findings will be submitted as special issue to peer-reviewed journals.  
11

## 12 **DISCUSSION**

13  
14 This comprehensive, nationally representative survey will for the first time characterize simultaneously  
15 the dietary intake and micronutrient status of Ethiopian children, adolescent girls and WRA. Besides,  
16 the study assesses key drivers of malnutrition including soil nutrient composition, as well as coverage of  
17 direct and indirect nutrition interventions. The survey will provide key insights informing the  
18 implementation of Ethiopia's National Food and Nutrition Strategy.  
19

20  
21 High-quality and timely data is critical to assess the burden of nutritional problems, identify  
22 vulnerable populations and priority actions, track the implementation of nutrition programs, and assess  
23 impact.<sup>39 40</sup> Ethiopia conducted its first-ever food consumption survey in 2011.<sup>19</sup>and its micronutrient  
24 survey in 2015.<sup>41</sup> Both surveys were collected at different times, which made it difficult to link the two  
25 surveys. Besides, the causes and solutions of malnutrition are complex and multisectoral; hence,  
26 requiring data on multiple indicators from various sectors spanning from soil nutrient, diets,  
27 micronutrient status, to access and exposure to direct and indirect nutrition interventions. In this  
28 regard, this survey is uniquely positioned to integrate data from multiple domains to support evidence-  
29 based decision making for improved diets, nutrition, and overall wellbeing.  
30  
31

32  
33 This study will allow us to evaluate progress relative to the last food consumption and  
34 micronutrient surveys, but more importantly will serve as a baseline to which future progress related to  
35 the implementation of the food and nutrition strategy will be evaluated. Furthermore, the current  
36 survey will also serve as a baseline for the Ethiopian Food System Transformation Plan by capturing  
37 majority indicators used for monitoring food systems related progress. Thus, filling information gaps  
38 that could have impeded successful implementation of the National Food and Nutrition Strategy (FNS).  
39 By establishing 13 strategic objectives, the FNS is intended to be aligned with the strategic directions of  
40 the Food and Nutrition Policy (FNP). Each strategy direction includes initiatives, actions, and key  
41 performance indicators, as well as leading and collaborating sectors. The key performance indicators  
42 should be evaluated to determine the progress of each implementing sector's achievement. The current  
43 survey will provide up to date national and subnational information on the current food and nutrition  
44 situation in Ethiopia for different target populations as well as provide comprehensive list of indicators  
45 that are pertinent to the implementation of the policy.<sup>39</sup> In addition, this study will provide information  
46 on context-specific determinants for prioritizing direct and indirect actions that can be implemented  
47 across sectors taking into account the specific needs of different target populations.  
48  
49  
50  
51  
52

53 Additionally, effective multisectoral interventions that address the immediate and underlying  
54 determinants of malnutrition must be implemented in order to accelerate the reduction of malnutrition  
55 in its all form.<sup>39</sup> These interventions need to address context-specific determinants to reduce  
56  
57

1  
2  
3 malnutrition effectively.<sup>39</sup> The lack of timely and disaggregated information on the determinants of  
4 malnutrition is a bottleneck to preventing malnutrition, particularly among the most vulnerable target  
5 populations. This study will also provide information on the coverage and quality of interventions which  
6 can be used to contextualize National Food and Nutrition Strategy monitoring frameworks, monitor  
7 implementation and track progress towards global and local targets.  
8  
9

10 Although this study will provide regionally and nationally representative estimates for key  
11 indicators and critical life stages, it has several limitations. Inherent to the cross-sectional design of the  
12 study, the findings of this study cannot be used to establish cause and effect. Additionally, the design  
13 prevents us from considering seasonal differences in nutritional outcomes and determinants. This study  
14 also relies on self-reported data, which is subject to recall bias. Notwithstanding the above-mentioned  
15 limitations, this study is uniquely designed to combine the assessment of anthropometric status, 24hr  
16 recall quantitative dietary intakes and the determination of micronutrient status in the same  
17 participants, while at the same time capturing data on the food system. Additionally, the study will be  
18 evaluating micronutrients in the agricultural soil, which will expand our understanding of factors that  
19 influence nutrition. To the best of our knowledge, this will be among -if not-the first study to  
20 simultaneously collect these variables from the same household. This could contribute to a better  
21 understanding of nutritional problem across multiple facets—from soil to people to the environment. In  
22 the past, nutrition programs implemented in Ethiopia have relied on information provided from small-  
23 scale studies and population-based surveys such as the Ethiopia Demographic and Health Surveys.<sup>5-7 42 43</sup>  
24 Although these data sources provide some information to track progress and tailor interventions, they  
25 only provide data on a limited number of nutrition indicators and do not measure dietary intakes and  
26 assess biomarker status. This study will fill these data gaps by providing information on comprehensive  
27 indicators that show the burden and spatial distribution of micronutrient deficiencies and shifts of  
28 dietary patterns. Additionally, this study will provide information on emerging determinants such as  
29 mental health and intake of nutrients such as folate and B<sub>12</sub> that have not been included in previous  
30 studies. Finally, the inclusion of adolescent girls, and school-age children, will provide vital information  
31 on nutritional indicators for these target groups, which are often not included in other nationally  
32 representative surveys. This survey will also provide information on the coverage of direct interventions  
33 implemented in the health sectors and indirect interventions implemented in the agriculture, WASH,  
34 education and social protection sectors for whom scant data exists. Hence, this study will provide  
35 valuable information that will guide the implementation of strategic actions for the reduction of  
36 malnutrition in Ethiopia.  
37  
38  
39  
40  
41  
42  
43  
44  
45  
46  
47  
48  
49  
50  
51  
52  
53  
54  
55  
56  
57  
58  
59  
60

1  
2  
3 **Acknowledgments:**  
4

5 **Contributions:** MT, AL, SC, MW, AP, AS, and MG conceived the study and drafted the original protocol.  
6 All authors participated in refining of the protocol. AH, MW, MG and MT played a major role in the  
7 statistical consideration. DAD, FC, MG, RN, and ASD helped to write the draft protocol and made a  
8 critical contribution to the content. KB, AL, GT, MHD, LT and MZ supervised manuscript preparation. All  
9 authors took responsibility for reviewing, final editing and approval of the manuscript.  
10  
11

12 **Funding:** This work was supported by Power of Nutrition, BMGF and World Bank through UNICEF;  
13 Nutrition International, and Global Alliance for Improved Nutrition.  
14

15 **Competing interests:** The authors declare that they have no conflicts of interest.  
16

17 **Patient consent for publication:** Not required  
18  
19  
20  
21  
22  
23  
24  
25  
26  
27  
28  
29  
30  
31  
32  
33  
34  
35  
36  
37  
38  
39  
40  
41  
42  
43  
44  
45  
46  
47  
48  
49  
50  
51  
52  
53  
54  
55  
56  
57  
58  
59  
60

## References

1. Fanzo J, Hawkes C, Udomkesmalee E, et al. 2018 Global Nutrition Report. 2019
2. Black RE, Victora CG, Walker SP, et al. Maternal and child undernutrition and overweight in low-income and middle-income countries. *The Lancet* 2013;382(9890):427-51. doi: 10.1016/s0140-6736(13)60937-x
3. Martorell R. Improved nutrition in the first 1000 days and adult human capital and health. *Am J Hum Biol* 2017;29(2) doi: 10.1002/ajhb.22952 [published Online First: 2017/01/25]
4. United Nations. Transforming our world: The 2030 agenda for sustainable development, 2015.
5. Central Statistical Agency [Ethiopia] and ICF. Ethiopia demographic and health survey 2016. Addis Ababa, Ethiopia and Calverton, Maryland, USA: CSA and ICF, 2016.
6. Central Statistical Agency [Ethiopia] and ORC Macro. Ethiopia demographic and health survey 2000. Addis Ababa, Ethiopia and Calverton, Maryland, USA: CSA and ORC Macro, 2001.
7. Ethiopian Public Health Institute (EPHI) [Ethiopia] and ICF. Ethiopia Mini Demographic and Health Survey 2019: Key Indicators. Rockville, Maryland, USA: EPHI and ICF, 2019.
8. Ethiopian Public Health Institute. Ethiopian national micronutrient survey report Ethiopian Public Health Institute, 2016.
9. Hassen I, Dereje M, Minten B, et al. Diet transformation in Africa: the case of Ethiopia. *Agricultural Economics* 2017
10. Ethiopian Public Health Institute, Federal Ministry of Health, World Health Organization. Ethiopia STEPS report in risk factors for non-communicable diseases and prevalence of selected NCDs Addis Ababa, Ethiopia: Ethiopian Public Health Institute 2016.
11. World Health Organization. Global nutrition monitoring framework: Operational guidance for tracking progress in meeting targets for 2025. Geneva: WHO, 2017.
12. Federal Democratic Republic of Ethiopia. National Nutrition Program: 2013-2015. Addis Ababa, Ethiopia, 2013.
13. Federal Democratic Republic of Ethiopia. National Nutrition Program: 2016-2020. Addis Ababa, Ethiopia., 2016.
14. Federal Democratic Republic of Ethiopia. Food and Nutrition Policy, 2018.
15. Federal Democratic Republic of Ethiopia. National Food and Nutrition Strategy (2021-2023), 2021.
16. Reinhardt K, Fanzo J. Addressing Chronic Malnutrition through Multi-Sectoral, Sustainable Approaches: A Review of the Causes and Consequences. *Front Nutr* 2014;1:13. doi: 10.3389/fnut.2014.00013 [published Online First: 2014/01/01]
17. Bank W. Population projections Ethiopia 2021 [
18. Bardosh KL, Hussein JW, Sadik EA, et al. Chicken eggs, childhood stunting and environmental hygiene: an ethnographic study from the Campylobacter genomics and environmental enteric dysfunction (CAGED) project in Ethiopia. *One Health Outlook* 2020;2(1) doi: 10.1186/s42522-020-00012-9
19. Ethiopian Public Health Institute. Ethiopian national food consumption survey Ethiopian Public Health Institute, 2013.
20. UNICEF Wa. Recommendations for data collection, analysis and reporting on anthropometric indicators in children under 5 years old. : World Health Organization and the United Nations Children's Fund (UNICEF), 2019.
21. WHO, UNICEF. Indicators for assessing infant and young child feeding practices: definitions and measurement methods. Geneva: World Health Organization and the United Nations Children's Fund (UNICEF), 2021.
22. Ville AS, Tsun Po JY, Sen A, et al. Food security and the Food Insecurity Experience Scale (FIES): ensuring progress by 2030. *Food Security* 2019;11(3):483-91. doi: 10.1007/s12571-019-00936-9

23. World Health Organization. Self-reported mental health questionnaires 1994.
24. Gibson RS, Ferguson EL. An interactive 24-hour recall for assessing the adequacy of iron and zinc intakes in developing countries HarvestPlus 2008.
25. Vossenaar M, Arimond M, Deitchler M, et al. An overview of the main pre-survey tasks required for large-scale quantitative 24-Hour recall dietary surveys in low- and middle-income countries. Washington, DC: Intake – Center for Dietary Assessment/FHI Solutions., 2020.
26. Intake – Center for Dietary Assessment. Dietary Survey Protocol Template: An Outline to Assist with the Development of a Protocol for a Quantitative 24-Hour Dietary Recall Survey in a Low- or Middle-Income Country Washington, DC: Intake – Center for Dietary Assessment/FHI Solutions., 2020.
27. Central Statistical Agency[Ethiopia]. Household Consumption and Expenditure (HCE) Survey 2015/16: Analytical Report. Addis Ababa: CSA, 2016.
28. Vossenaar M, Lubowa A, Hotz C, et al. Considerations for the Selection of Portion Size Estimation Methods for Use in Quantitative 24-Hour Dietary Recall Surveys in Low- and Middle-Income Countries. Washington, DC: Intake – Center for Dietary Assessment/FHI Solutions, 2020.
29. Organization WH. Micronutrient survey manual. 2020
30. Jaggernath M, Naicker R, Madurai S, et al. Diagnostic Accuracy of the HemoCue Hb 301, STAT-Site MHgb and URIT-12 Point-of-Care Hemoglobin Meters in a Central Laboratory and a Community Based Clinic in Durban, South Africa. *PloS one* 2016;11(4):e0152184. doi: 10.1371/journal.pone.0152184 [published Online First: 2016/04/06]
31. Wieringa FT, Dahl M, Chamnan C, et al. The High Prevalence of Anemia in Cambodian Children and Women Cannot Be Satisfactorily Explained by Nutritional Deficiencies or Hemoglobin Disorders. *Nutrients* 2016;8(6) doi: 10.3390/nu8060348 [published Online First: 2016/06/25]
32. Lee GC, Jeon ES, Le DT, et al. Development and evaluation of a rapid diagnostic test for Plasmodium falciparum, P. vivax, and mixed-species malaria antigens. *Am J Trop Med Hyg* 2011;85(6):989-93. doi: 10.4269/ajtmh.2011.11-0265 [published Online First: 2011/12/07]
33. Demeke G, Fenta A, Dilnessa T. Evaluation of Wet Mount and Concentration Techniques of Stool Examination for Intestinal Parasites Identification at Debre Markos Comprehensive Specialized Hospital, Ethiopia. *Infect Drug Resist* 2021;14:1357-62. doi: 10.2147/IDR.S307683 [published Online First: 2021/04/17]
34. Kache R, Phasuk N, Viriyavejakul P, et al. Prevalence of soil-transmitted helminth infections and associated risk factors among elderly individuals living in rural areas of southern Thailand. *BMC public health* 2020;20(1):1882. doi: 10.1186/s12889-020-09986-7 [published Online First: 2020/12/09]
35. Machado A, Lima L, Mesquita RBR, et al. Improvement of the Sandell-Kolthoff reaction method (ammonium persulfate digestion) for the determination of iodine in urine samples. *Clin Chem Lab Med* 2017;55(9):e206-e08. doi: 10.1515/cclm-2016-1094 [published Online First: 2017/03/18]
36. Jooste PL, Strydom E. Methods for determination of iodine in urine and salt. *Best Pract Res Clin Endocrinol Metab* 2010;24(1):77-88. doi: 10.1016/j.beem.2009.08.006 [published Online First: 2010/02/23]
37. Lindsay WL, Norvell W. Development of a DTPA soil test for zinc, iron, manganese, and copper. *Soil Sci Soc Am J* 1978;42(3):421-28.
38. Karamizadeh S, Abdullah SM, Manaf AA, et al. An overview of principal component analysis. *Journal of Signal and Information Processing* 2020;4
39. Heidkamp RA, Piwoz E, Gillespie S, et al. Mobilising evidence, data, and resources to achieve global maternal and child undernutrition targets and the Sustainable Development Goals: an agenda for action. *The Lancet* 2021 doi: 10.1016/s0140-6736(21)00568-7



- 1  
2  
3 40. Victora CG, Christian P, Vidaletti LP, et al. Revisiting maternal and child undernutrition in low-income  
4 and middle-income countries: variable progress towards an unfinished agenda. *The Lancet* 2021  
5 doi: 10.1016/s0140-6736(21)00394-9  
6  
7 41. Institute EPH. Ethiopian national micronutrient Survey. Addis Ababa, Ethiopia Ethiopian Public  
8 Health Institute 2016.  
9  
10 42. Central Statistical Agency [Ethiopia] and ICF. Ethiopia demographic and health survey 2011. Addis  
11 Ababa, Ethiopia and Calverton, Maryland, USA: CSA and ICF, 2011.  
12 43. Central Statistical Agency [Ethiopia] and ORC Macro. Ethiopia demographic and health survey 2005.  
13 Addis Ababa, Ethiopia and Calverton, Maryland, USA: CSA and ORC Macro, 2006.  
14  
15  
16  
17  
18  
19  
20  
21  
22  
23  
24  
25  
26  
27  
28  
29  
30  
31  
32  
33  
34  
35  
36  
37  
38  
39  
40  
41  
42  
43  
44  
45  
46  
47  
48  
49  
50  
51  
52  
53  
54  
55  
56  
57  
58  
59  
60

For peer review only

1  
2  
3  
4  
5  
6  
7  
8  
9  
10  
11  
12  
13  
14  
15  
16  
17  
18  
19  
20  
21  
22  
23  
24  
25  
26  
27  
28  
29  
30  
31  
32  
33  
34  
35  
36  
37  
38  
39  
40  
41  
42  
43  
44  
45  
46  
47  
48  
49  
50  
51  
52  
53  
54  
55  
56  
57  
58  
59  
60

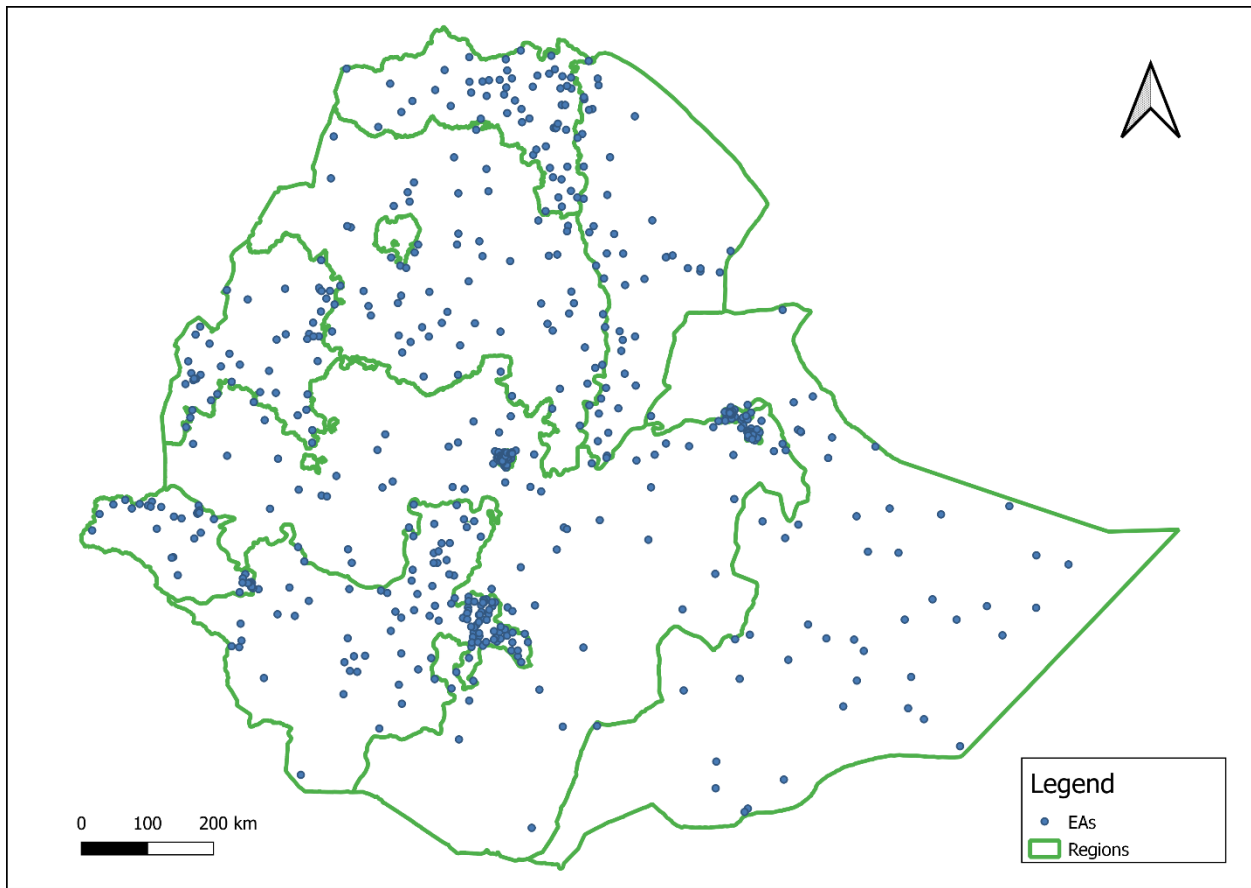

**Figure 1.** Map showing study enumeration areas across regions

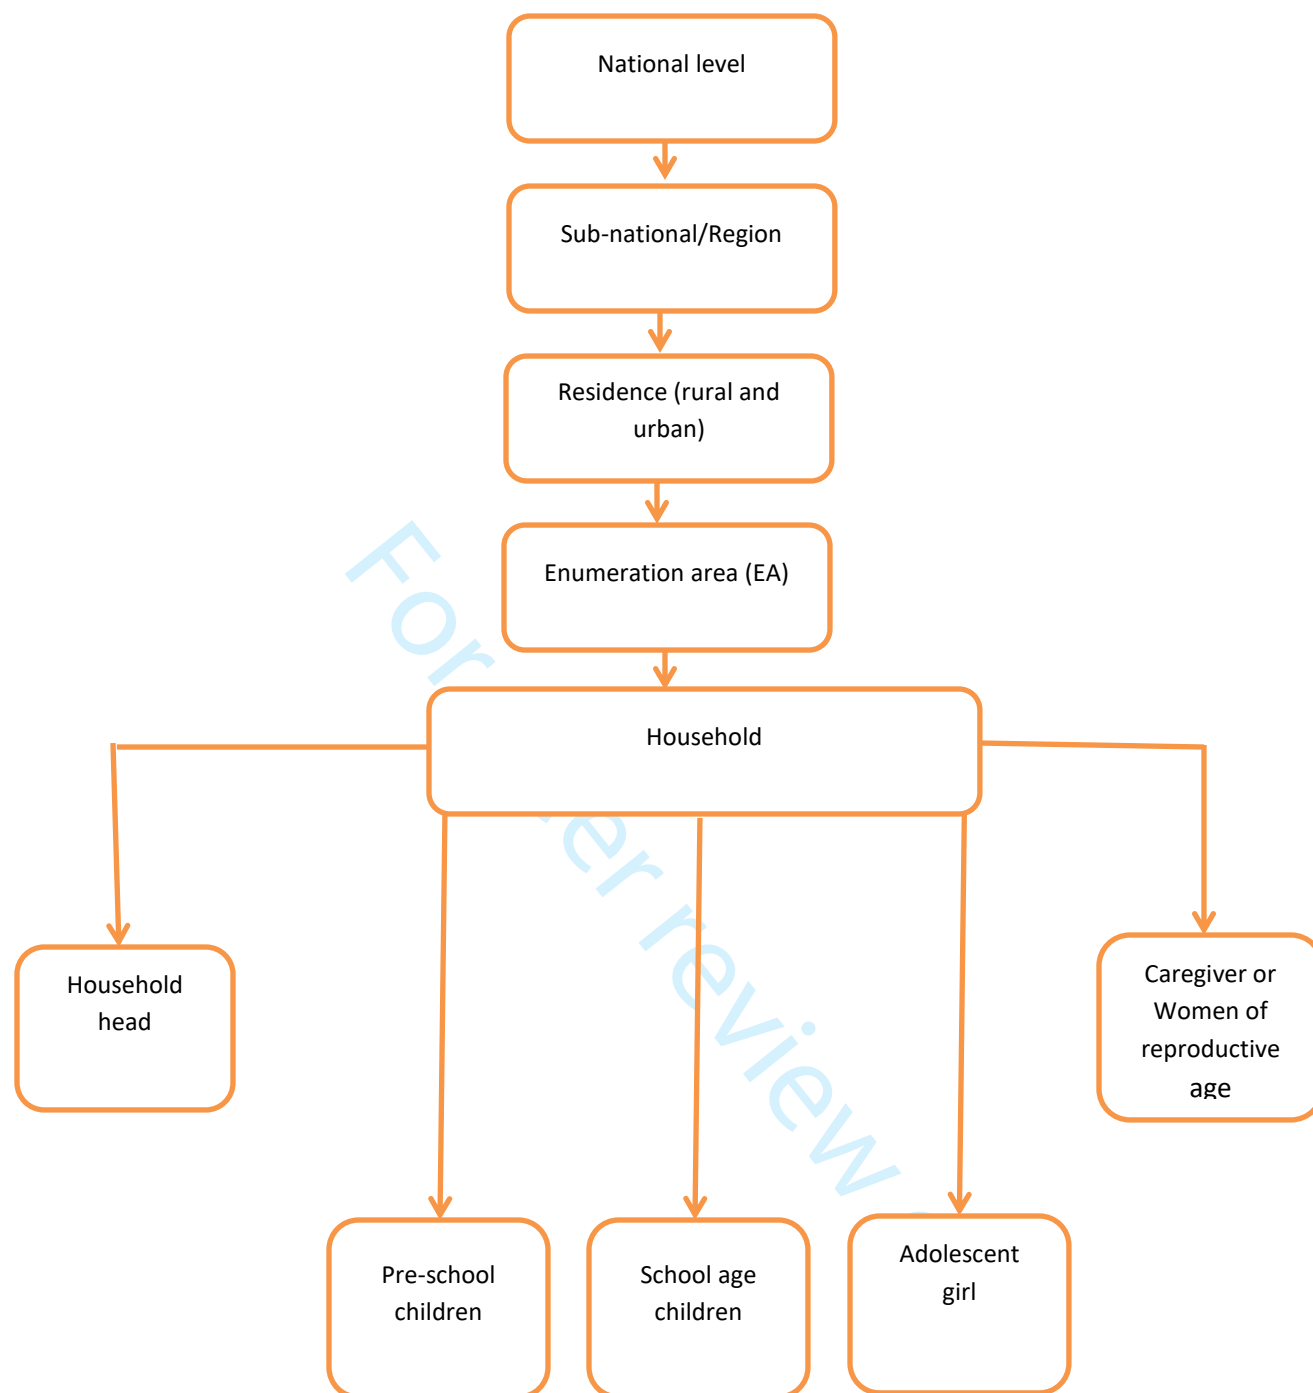

43  
44  
45  
46  
47  
48  
49  
50  
51  
52  
53  
54  
55  
56  
57  
58  
59  
60

**Figure 2.** Sampling frame for Ethiopia National Food and Nutrition Survey to Inform the Ethiopian Food and Nutrition Strategy

**Table 1S.** Key indicators used to estimate sample size for each target group

| Target Group                                | Key indicators used to estimate sample size |
|---------------------------------------------|---------------------------------------------|
| Children under 5 years of age (0-59 months) | Vitamin A deficiency                        |
|                                             | Total goiter prevalence                     |
|                                             | Stunting                                    |
|                                             | Any anemia                                  |
|                                             | Zinc deficiency                             |
| Women of reproductive age (15-49 years)     | Prevalence of inadequate intake of zinc     |
|                                             | Vitamin A deficiency                        |
|                                             | Total goiter prevalence                     |
|                                             | Any anemia                                  |
|                                             | Zinc deficiency                             |
|                                             | RBC folate deficiency                       |
|                                             | Serum folate deficiency                     |
|                                             | Vitamin B <sub>12</sub> deficiency          |
|                                             | Iodized salt coverage                       |
| Prevalence of inadequate intake of iron     |                                             |
| School age children (6 to 12 years)         | Prevalence of inadequate intake of zinc     |
|                                             | Prevalence of inadequate intake vitamin A   |
|                                             | Vitamin A deficiency                        |
|                                             | Total goiter prevalence                     |
|                                             | Any anemia                                  |
| Adolescent girls (10 to 19 years)           | Iodine deficiency                           |
|                                             | Zinc deficiency                             |
| Adolescent girls (10 to 19 years)           | Any anemia                                  |

**Table 2S.** Sample size determination and allocation

| Region                   | Indicator used to estimate sample size | Number of EA | Number of HH  | Expected number pre-school children (0-59 months) | Expected number of WRA (15-49 years) | Expected number school age children (6-12 years) | Expected number of adolescent girls (10-19 years) | Total population (2019 year projection) |
|--------------------------|----------------------------------------|--------------|---------------|---------------------------------------------------|--------------------------------------|--------------------------------------------------|---------------------------------------------------|-----------------------------------------|
| Tigray                   | Any anemia                             | 55           | 1,432         | 590                                               | 1,236                                | 753                                              | 516                                               | 5,443,095                               |
| Afar                     | Stunting                               | 51           | 1,328         | 539                                               | 1,096                                | 695                                              | 406                                               | 1,901,863                               |
| Amhara                   | Stunting                               | 61           | 1,585         | 619                                               | 1,253                                | 843                                              | 531                                               | 21,842,548                              |
| Oromia                   | IDD                                    | 62           | 1,622         | 891                                               | 1,539                                | 1,111                                            | 739                                               | 37,267,225                              |
| Somali                   | IDD                                    | 55           | 1,424         | 855                                               | 1,268                                | 1,000                                            | 492                                               | 6,050,851                               |
| Benishangul-Gumuz        | Stunting                               | 49           | 1,282         | 555                                               | 1,127                                | 732                                              | 475                                               | 1,126,656                               |
| SNNPR                    | Any anemia                             | 59           | 1,528         | 818                                               | 1,492                                | 1,000                                            | 692                                               | 15,763,484                              |
| Gambela                  | Any anemia                             | 47           | 1,211         | 428                                               | 1,018                                | 568                                              | 373                                               | 463,203                                 |
| Harari                   | Any anemia                             | 45           | 1,164         | 375                                               | 978                                  | 499                                              | 348                                               | 257,362                                 |
| Addis Ababa              | IDD/ TGR                               | 54           | 1,411         | 413                                               | 1,274                                | 405                                              | 262                                               | 3,685,684                               |
| Dire Dawa                | Stunting                               | 47           | 1,215         | 382                                               | 1,128                                | 480                                              | 360                                               | 492,819                                 |
| Sidama                   | Any anemia                             | 54           | 1,395         | 747                                               | 1,363                                | 914                                              | 632                                               | 4,322,685                               |
| <b>Total sample size</b> |                                        | <b>639</b>   | <b>16,596</b> | <b>7,213</b>                                      | <b>14,772</b>                        | <b>9,001</b>                                     | <b>5,824</b>                                      | <b>98,617,475</b>                       |

|                                                                                 |                                          |                                   |               |
|---------------------------------------------------------------------------------|------------------------------------------|-----------------------------------|---------------|
|  | Name of institute                        | Doc. number:                      | Version No: 3 |
|                                                                                 | <b>ETHIOPIAN PUBLIC HEALTH INSTITUTE</b> | EPHI/ TL/ FNL/TM/7.2.11           | Copy no_____  |
| Document Title: <b>DETERMINTION OF IODINE FROM SALT SAMPLE</b>                  |                                          | Effective date: November 20, 2020 |               |

### 1. Purpose

This procedure used to determine the amount of iodine content in the form of potassium iodate ( $\text{KIO}_3$ ) by iodometric titration from iodized salt.

### 2. Abbreviations:

|            |                   |                                                                 |                                  |
|------------|-------------------|-----------------------------------------------------------------|----------------------------------|
| <b>g</b>   | gram              | <b>KI</b>                                                       | Potassium Iodide                 |
| <b>ppm</b> | Parts Per million | <b>H<sub>2</sub>SO<sub>4</sub></b>                              | sulfuric acid                    |
| <b>M</b>   | Molarity          | <b>KIO<sub>3</sub></b>                                          | potassium iodate                 |
| <b>ml</b>  | mili liter        | <b>IDD</b>                                                      | Iodine deficiency disorder       |
| <b>N</b>   | Normality         | <b>Na<sub>2</sub>S<sub>2</sub>O<sub>3</sub>.5H<sub>2</sub>O</b> | sodium thiosulfate penta hydrate |

### 3. Principle:

Iodine released from potassium iodate by the action of sulphuric acid and the released iodine trapped with potassium iodide and titrate with sodium thiosulphate.

### 4. Material and methods

#### 4.1 Reagents

- 0.005M  $\text{Na}_2\text{S}_2\text{O}_3 \cdot 5\text{H}_2\text{O}$
- 2N  $\text{H}_2\text{SO}_4$
- 10% KI
- 1% Starch

#### 4.2 Reagents preparation:

- **1%starch:** Dissolve 1 g of soluble starch in 100ml boiled distilled water heat the solution till starch dissolve completely.
- **10% KI;** Dissolve 10gm of KI in 100ml deionized water.

Prepared by: Addisu Legesse and Teshome Assefa

Authority: EPHI

NOTE: This is a CONTROLLED document for internal use only. Any documents appearing in paper form are not controlled and should be checked against the electronic version prior to use.

|                                                                                 |                                          |                                   |               |
|---------------------------------------------------------------------------------|------------------------------------------|-----------------------------------|---------------|
|  | Name of institute                        | Doc. number:                      | Version No: 3 |
|                                                                                 | <b>ETHIOPIAN PUBLIC HEALTH INSTITUTE</b> | EPHI/ TL/ FNL/TM/7.2.11           | Copy no_____  |
| Document Title: <b>DETERMIANTION OF IODINE FROM SALT SAMPLE</b>                 |                                          | Effective date: November 20, 2020 |               |

- **2N H<sub>2</sub>SO<sub>4</sub>**; Slowly add 6 ml of concentrated H<sub>2</sub>SO<sub>4</sub> to 90 ml of deionized water make the final volume 100 ml.
- **0.005M Na<sub>2</sub>S<sub>2</sub>O<sub>3</sub>**; Dissolve 1.24gm of Na<sub>2</sub>S<sub>2</sub>O<sub>3</sub>.5H<sub>2</sub>O in 1000 ml of deionized water

#### 4.3 Reagents stability and storage:

- Na<sub>2</sub>S<sub>2</sub>O<sub>3</sub>.5H<sub>2</sub>O & 10% KI reagents store in a cool & dark place for six months.
- H<sub>2</sub>SO<sub>4</sub> store at room temperature it stable indefinitely.
- Starch should be prepared daily.

#### 5. Supplies and Equipment

- Balance (Four-beam pan): Sensitivity = 0.01g, Capacity = 410g
- Flask, volumetric, 1000mL, 100mL
- Measuring cylinder, 10mL, 100mL
- Beakers (Pyrex)
- Flasks, Erlenmeyer (conical) with stopper, 250mL
- Pipette, volumetric, 1mL, 5mL
- Burette w/straight stopcock 10mL
- Burette stand
- Laboratory safety glasses
- Parafilm, for covering beakers
- Glass bottles with stoppers, for reagents, 250mL
- Spatula Lab single blade 150mm SS length
- Dropper bottle, glass 25-60mL
- Hot plate

#### 6. Sample

- Sample type: salt
- Amount required: 50-100g
- Transport and storage: At room temperature avoid exposure to direct sunlight

Prepared by: Addisu Legesse and Teshome Assefa

Authority: EPHI

NOTE: This is a CONTROLLED document for internal use only. Any documents appearing in paper form are not controlled and should be checked against the electronic version prior to use.

|                                                                                 |                                          |                                   |               |
|---------------------------------------------------------------------------------|------------------------------------------|-----------------------------------|---------------|
|  | Name of institute                        | Doc. number:                      | Version No: 3 |
|                                                                                 | <b>ETHIOPIAN PUBLIC HEALTH INSTITUTE</b> | EPHI/ TL/ FNL/TM/7.2.11           | Copy no_____  |
| Document Title: <b>DETERMIANTION OF IODINE FROM SALT SAMPLE</b>                 |                                          | Effective date: November 20, 2020 |               |

- Stability: At room temperature for 3 months.

## 7. Special Safety and Precautions

- While titrate the sample wear eye google.
- The reaction mixture should be kept in the dark before titration because a side reaction can occur when the solution is exposed to light that causes iodide ions to be oxidized to iodine.
- Inaccurate results may occur if starch solution is used while still warm.
- If starch indicator is added too early, a strong iodine-starch complex is formed, which reacts slowly, and gives falsely elevated results.
- The reaction should be performed at mild room temperature (<30 °C), since the iodine is volatile, and the indicator solution loses sensitivity when exposed to high temperatures.

## 8. Procedure

- 8.1 Weigh 10g of the salt sample into a 250mL Erlenmeyer flask with a stopper.
- 8.2 Add approximately 50 mL water, swirl to dissolve salt sample.
- 8.3 Add 1 ml 2N H<sub>2</sub>SO<sub>4</sub>
- 8.4 Add 5mL 10% KI. The solution should turn yellow if iodine is present.
- 8.5 Close the flask with stopper & put it in the dark place for 10 minutes in closed box (cupboard or drawer).
- 8.6 Rinse and fill burette with 0.005M Na<sub>2</sub>S<sub>2</sub>O<sub>3</sub>, and adjust level to zero.
- 8.7 After 10 minutes take the flask out from drawer, and add some Na<sub>2</sub>S<sub>2</sub>O<sub>3</sub> from the titration burette Until the solution turns pale yellow.
- 8.8 Add approximately 2mL of starch indicator solution (the solution should turn dark purple) and continue titrating with 0.005M Na<sub>2</sub>S<sub>2</sub>O<sub>3</sub> until the solution becomes pink, and finally colorless.
- 8.9 Record the level of thiosulfate in the burette and convert to parts per million (ppm)

Prepared by: Addisu Legesse and Teshome Assefa

Authority: EPHI

NOTE: This is a CONTROLLED document for internal use only. Any documents appearing in paper form are not controlled and should be checked against the electronic version prior to use.



|                                                                                 |                                          |                                   |               |
|---------------------------------------------------------------------------------|------------------------------------------|-----------------------------------|---------------|
|  | Name of institute                        | Doc. number:                      | Version No: 3 |
|                                                                                 | <b>ETHIOPIAN PUBLIC HEALTH INSTITUTE</b> | EPHI/ TL/ FNL/TM/7.2.11           | Copy no_____  |
| Document Title: <b>DETERMIANTION OF IODINE FROM SALT SAMPLE</b>                 |                                          | Effective date: November 20, 2020 |               |

## 9. Quality control:

- **Control material:** KIO<sub>3</sub>
- **Level of iodine:** 59.3-60.3ppm
- **Stability:** stable at room temperature for long period of time.
- **Frequency:** per batch

**10. Quality control preparation:** Prepare 0.0047M KIO<sub>3</sub> in 100ml. By weighing 0.10058g in 100ml deionized water. From this solution Pipette out 1 ml into conical flask and follow the procedure proceed from step 2 as described above.

## 11. Calculation

$$\text{Iodine(ppm)} = 10.6 * V \text{ Na}_2\text{S}_2\text{O}_3(\text{ml})$$

**Where:** VNa<sub>2</sub>S<sub>2</sub>O<sub>3</sub>: Volume of sodium thiosulphate takes to titrate iodine in salt

## 12. Result Interpretation

- **<5ppm** to indicate salt with no added iodine
- **5-14.9** ppm to indicate inadequately iodized salt
- **15-39.9** ppm to indicate salt is adequately iodized
- **>40** ppm of iodine is not recommended.

## 13. Other Records

- Data Log sheet
- QC chart

## 14. References

- De Maeyer, Lowenstein & Thilly, 1979; World Health Organization (WHO), United Nations Children Fund (UNICEF) & ICCIDD, 2007.
- AOAC 925.56 2016

Prepared by: Addisu Legesse and Teshome Assefa

Authority: EPHI

NOTE: This is a CONTROLLED document for internal use only. Any documents appearing in paper form are not controlled and should be checked against the electronic version prior to use.

|                                                                                 |                                          |                                   |               |
|---------------------------------------------------------------------------------|------------------------------------------|-----------------------------------|---------------|
|  | Name of institute                        | Doc. number:                      | Version No: 3 |
|                                                                                 | <b>ETHIOPIAN PUBLIC HEALTH INSTITUTE</b> | EPHI/ TL/ FNL/TM/7.2.11           | Copy no_____  |
| Document Title: <b>DETERMINTION OF IODINE FROM SALT SAMPLE</b>                  |                                          | Effective date: November 20, 2020 |               |

## 15. Annex

Conversion chart for iodine in fortified salt in the form of  $KIO_3$  (PPM)

| Volume<br>Thiosulphate<br>(mL) | Iodine<br>(ppm) | Volume<br>Thiosulphate<br>(mL) | Iodine<br>(ppm) | Volume<br>Thiosulphate<br>(mL) | Iodine<br>(ppm) | Volume<br>Thiosulphate<br>(mL) | Iodine<br>(ppm) | Volume<br>Thiosulphate<br>(mL) | Iodine<br>(ppm) | Volume<br>Thiosulphate<br>(mL) | Iodine<br>(ppm) |
|--------------------------------|-----------------|--------------------------------|-----------------|--------------------------------|-----------------|--------------------------------|-----------------|--------------------------------|-----------------|--------------------------------|-----------------|
| 0.1                            | 1.1             | 2.0                            | 21.2            | 3.9                            | 41.3            | 5.8                            | 61.5            | 7.7                            | 81.6            | 9.6                            | 101.8           |
| 0.2                            | 2.1             | 2.1                            | 22.2            | 4.0                            | 42.4            | 5.9                            | 62.5            | 7.8                            | 82.7            | 9.7                            | 102.8           |
| 0.3                            | 3.2             | 2.2                            | 23.3            | 4.1                            | 43.5            | 6.0                            | 63.6            | 7.9                            | 83.4            | 9.8                            | 103.9           |
| 0.4                            | 4.2             | 2.3                            | 24.4            | 4.2                            | 44.5            | 6.1                            | 64.7            | 8.0                            | 84.8            | 9.9                            | 104.9           |
| 0.5                            | 5.3             | 2.4                            | 25.4            | 4.3                            | 45.6            | 6.2                            | 65.7            | 8.1                            | 85.9            | 10.0                           | 106.0           |
| 0.6                            | 6.4             | 2.5                            | 26.5            | 4.4                            | 46.4            | 6.3                            | 66.8            | 8.2                            | 86.9            | 10.1                           | 107.1           |
| 0.7                            | 7.4             | 2.6                            | 27.6            | 4.5                            | 47.7            | 6.4                            | 67.8            | 8.3                            | 88.0            | 10.2                           | 108.1           |
| 0.8                            | 8.5             | 2.7                            | 28.6            | 4.6                            | 48.8            | 6.5                            | 68.9            | 8.4                            | 89.0            | 10.3                           | 109.2           |
| 0.9                            | 9.4             | 2.8                            | 29.7            | 4.7                            | 49.8            | 6.6                            | 70.0            | 8.5                            | 90.1            | 10.4                           | 110.2           |
| 1.0                            | 10.6            | 2.9                            | 30.7            | 4.8                            | 50.9            | 6.7                            | 71.0            | 8.6                            | 91.2            | 10.5                           | 111.3           |
| 1.1                            | 11.7            | 3.0                            | 31.8            | 4.9                            | 51.9            | 6.8                            | 72.1            | 8.7                            | 92.2            | 10.6                           | 112.4           |
| 1.2                            | 12.2            | 3.1                            | 32.9            | 5.0                            | 53.0            | 6.9                            | 73.1            | 8.8                            | 93.3            | 10.7                           | 113.4           |
| 1.3                            | 13.8            | 3.2                            | 33.9            | 5.1                            | 54.1            | 7.0                            | 74.2            | 8.9                            | 94.3            | 10.8                           | 114.5           |
| 1.4                            | 14.8            | 3.3                            | 35.0            | 5.2                            | 55.1            | 7.1                            | 75.3            | 9.0                            | 95.4            | 10.9                           | 115.5           |
| 1.5                            | 15.9            | 3.4                            | 36.0            | 5.3                            | 56.2            | 7.2                            | 76.3            | 9.1                            | 96.5            | 11.0                           | 116.6           |
| 1.6                            | 17.0            | 3.5                            | 37.1            | 5.4                            | 57.2            | 7.3                            | 77.4            | 9.2                            | 97.5            | 11.1                           | 117.7           |
| 1.7                            | 18.0            | 3.6                            | 38.2            | 5.5                            | 58.3            | 7.4                            | 78.4            | 9.3                            | 98.6            | 11.2                           | 118.7           |
| 1.8                            | 19.1            | 3.7                            | 39.2            | 5.6                            | 59.4            | 7.5                            | 79.5            | 9.4                            | 99.7            | 11.3                           | 119.8           |
| 1.9                            | 20.1            | 3.8                            | 40.3            | 5.7                            | 60.4            | 7.6                            | 80.6            | 9.5                            | 100.7           | 11.4                           | 120.8           |

Prepared by: Addisu Legesse and Teshome Assefa

Authority: EPHI

NOTE: This is a CONTROLLED document for internal use only. Any documents appearing in paper form are not controlled and should be checked against the electronic version prior to use.

|                                                                                 |                                                                   |                                             |               |
|---------------------------------------------------------------------------------|-------------------------------------------------------------------|---------------------------------------------|---------------|
|  | Name of institute<br><br><b>ETHIOPIAN PUBLIC HEALTH INSTITUTE</b> | Doc. number:<br><br>EPHI/ TL/ FNL/TM/7.2.11 | Version No: 3 |
|                                                                                 |                                                                   |                                             | Copy no _____ |
| Document Title: <b>DETERMIANTION OF IODINE FROM SALT SAMPLE</b>                 |                                                                   | Effective date: November 20, 2020           |               |

Name

Signature

Prepared by: -----

-----

Reviewed by: -----

-----

Approved by: -----

-----

(Director of Food science and Nutrition research directorate)

**Declaration**

I, the undersigned laboratory personnel, certify that I am conducting every steps of the procedures incorporated in this SOP after a prior reading.

**Name**

**Signature and Date**

.....  
 .....  
 .....  
 .....  
 .....

.....  
 .....  
 .....  
 .....  
 .....

|                                                |                 |
|------------------------------------------------|-----------------|
| Prepared by: Addisu Legesse and Teshome Assefa | Authority: EPHI |
|------------------------------------------------|-----------------|

NOTE: This is a CONTROLLED document for internal use only. Any documents appearing in paper form are not controlled and should be checked against the electronic version prior to use.

|                                                                                 |                                          |                                   |               |
|---------------------------------------------------------------------------------|------------------------------------------|-----------------------------------|---------------|
|  | Name of institute                        | Doc. number:                      | Version No: 3 |
|                                                                                 | <b>ETHIOPIAN PUBLIC HEALTH INSTITUTE</b> | EPHI/ TL/ FNL/TM/7.2.11           | Copy no_____  |
| Document Title: <b>DETERMIANTION OF IODINE FROM SALT SAMPLE</b>                 |                                          | Effective date: November 20, 2020 |               |

### Document Change History

| Revision No. | Date approved  | Nature of revision                                           |
|--------------|----------------|--------------------------------------------------------------|
| 1            | February, 2019 | Initial release                                              |
| 2            | November, 2020 | Typographical adjustment<br>Document revision table is added |

Prepared by: Addisu Legesse and Teshome Assefa

Authority: EPHI

NOTE: This is a CONTROLLED document for internal use only. Any documents appearing in paper form are not controlled and should be checked against the electronic version prior to use.

1  
2  
3  
4  
5  
6  
7  
8  
9  
10  
11  
12  
13  
14  
15  
16  
17  
18  
19  
20  
21  
22  
23  
24  
25  
26  
27  
28  
29  
30  
31  
32  
33  
34  
35  
36  
37  
38  
39  
40  
41  
42  
43  
44  
45  
46  
47  
48  
49  
50  
51  
52  
53  
54  
55  
56  
57  
58  
59  
60

**Determination of serum retinol using hexane as the serum sample  
extraction procedure**

1  
2  
3  
4 Contents

5 **1. Reagents and materials**..... 2  
6 **2. Instrument (HPLC) parameters – we have Shimadzu prominence HPLC.**..... 2  
7 **3. Sample extraction procedure**..... 2  
8 **4. Calculation**..... 3  
9 **5. Reference** ..... 3  
10  
11  
12  
13  
14  
15  
16  
17  
18  
19  
20  
21  
22  
23  
24  
25  
26  
27  
28  
29  
30  
31  
32  
33  
34  
35  
36  
37  
38  
39  
40  
41  
42  
43  
44  
45  
46  
47  
48  
49  
50  
51  
52  
53  
54  
55  
56  
57  
58  
59  
60

For peer review only

### 1. Reagents and materials

- Methanol (HPLC grade)
- Hexane (HPLC grade)
- Ethanol (HPLC grade/AR grade)
- Normal saline solution (0.9% NaCl)
- Retinol acetate (as internal standard)
- Retinol (as external standard)
- CRM (Certified Reference Material) for serum retinol
- 15 ml centrifuge tube
- Vortex mixer
- Centrifuge (up to 4000 rpm capacity)
- Centrifuge tube rack
- Micropipettes (10-100 $\mu$ l and 100-1000 $\mu$ l)
- Micropipettes tips for both types
- Stopwatch
- HPLC Vials (1ml)

### 2. Instrument (HPLC) parameters – we have Shimadzu prominence HPLC.

- Detector - SPD-10A UV/VIS at 325 nm
- Column – SUPELCOSIL<sup>TM</sup>LC-NH<sub>2</sub>-NP, 25cm \* 4.6mm, 5 $\mu$ m
- Mobile phase – HPLC grade methanol
- Elution system – isocratic

### 3. Sample extraction procedure

- Add 200  $\mu$ l serum sample to 15ml plastic test tube.
- Add an equal volume of 50  $\mu$ g/dl retinol acetate and ethanol.
- Take 200  $\mu$ l of a series of standards (10, 20, 40, 60, 75  $\mu$ g/dl) to the 15 ml centrifuge tube and add the same volume of retinol acetate and normal saline solution.
- Mix the standard and sample solutions with a vortex mixer
- Add 1ml of HPLC grade hexane and mix for 45 seconds
- Centrifuge the solution at 4000rpm for 7 minutes and transfer the supernatant to other test tubes
- The solution has to be extract twice by adding 1 ml hexane.

- Dry the hexane using nitrogen gas and reconstitute by 500µl HPLC grade methanol
- It has to be mix for 30 minutes using a vortex mixer and transfer to 1 ml HPLC vials
- Analyze the extracted solutions using reversed-phase HPLC by isocratic elution system, at the flow rate of 1.5 ml/min, and injection volume 30µl

N: B: - Extract and analyse the CRM using the sample extraction procedure.

#### 4. Calculation

- Plot the calibration curve using area ratio of retinol (standard) and retinol acetate (internal standard) vs concentration ratio (retinol: retinol acetate).
- From the linear equation formula,  $Y = mx + b$ , the concentration of serum retinol can be calculated.

Where Y – is area ratio (retinol: retinol acetate) of sample

M – is slope and b – is Y intercept

X – is the concentration of serum retinol in µg/dl

#### 5. Reference

Quadro, Y.-K. K. and L. (2013). Reverse-Phase High-Performance Liquid Chromatography (HPLC) Analysis of Retinol and Retinyl Esters in Mouse Serum and Tissues. *Methods Mol Biol.* 2010; 652: 263–275. *Doi:10.1007/978-1-60327-325-1\_15.*, (12), 1–10. <https://doi.org/10.1007/978-1-60327-325-1>

von Lucke, A., Russell, R. M., Stephensen, C. B., Gannon, B. M., Craft, N. E., Haskell, M. J., ... Raiten, D. J. (2016). Biomarkers of Nutrition for Development (BOND)—Vitamin A Review. *The Journal of Nutrition*, 1816s-1848s. <https://doi.org/10.3945/jn.115.229708>.FIGURE

Prepared by: Nahom Tefera (September 2020)

Reviewed by: Meseret W/yohannis

Approved by: Dr. Masresha Tessema



|                                                                                   |                                                                   |                                                      |                                                       |
|-----------------------------------------------------------------------------------|-------------------------------------------------------------------|------------------------------------------------------|-------------------------------------------------------|
|  | Name of institute<br><br><b>ETHIOPIAN PUBLIC HEALTH INSTITUTE</b> | Doc. number:<br><br><b>EPHI/TL/FNL/T<br/>M7.2-17</b> | Version No: 3<br><br>Copy No. ____<br><br>Page 1 of 5 |
| Document Title: <b>DETERMINATION OF IODINE IN URINE</b>                           |                                                                   | Effective date: December, 2020                       |                                                       |

## 1 Scope

This test method is applicable for the determination of iodine from a urine sample.

## 2 Purpose

This procedure provides methods to control the amount of iodine and its toxicity by ammonium persulfate digestion with spectrophotometric detection of the Sandell-Kolthoff Reaction method from urine samples.

## 3 Principle

Urine is digested with ammonium persulfate. Iodide is the catalyst in the reduction of ceric ammonium sulfate (yellow) to cerous form (colorless) and is detected by the rate of color disappearance (Sandell-Kolthoff reaction).

## 4 Chemicals and Apparatus

### a) Chemicals

- Ammonium persulfate
- Arsenic trioxide
- Ceric ammonium sulphate
- Potassium iodate
- Deionized water
- Sodium chloride

### b) Apparatus

- Hot plate
- Oven
- UV-Vis spectrophotometer
- Volumetric flasks (100 – 2000 ml)
- Beakers (100- 1000 ml)

|                                                                                   |                                                                   |                                                      |                                    |
|-----------------------------------------------------------------------------------|-------------------------------------------------------------------|------------------------------------------------------|------------------------------------|
|  | Name of institute<br><br><b>ETHIOPIAN PUBLIC HEALTH INSTITUTE</b> | Doc. number:<br><br><b>EPHI/TL/FNL/T<br/>M7.2-17</b> | Version No: 3<br><br>Copy No. ____ |
| Document Title: <b>DETERMINATION OF IODINE IN URINE</b>                           |                                                                   | Effective date: December, 2020                       |                                    |

- Micropipette (100 – 1000  $\mu$ l)
- Pipette (5 – 10 ml)
- Vortex mixer
- Measuring cylinder (100 – 1000 ml)
- Glass test tubes (13\*100 mm)
- Analytical balance (nearest to the 0.0001 g)
- Erlenmeyer flask (2000 ml)

## 5 Reagents preparation

### a) 1 M Ammonium persulphate

- Dissolve 114.1 g  $H_2 N_2 O_8 S_2$  in deionized water and makeup to 500 ml with  $H_2O$ . Store away from light. Stable for at least one month.

### b) 5 N $H_2SO_4$

- Slowly add 139 ml concentrated (36 N)  $H_2SO_4$  to about 700 ml deionized water (careful - this generates heat!). When cool, adjust with deionized water to a final volume of 1 liter.

### c) 3.5 N $H_2SO_4$

- Slowly add 97 ml concentrated (36 N)  $H_2SO_4$  to about 800 ml deionized water (careful - this generates heat!), and when cool, adjusting with deionized water to a final volume of 1 liter

### d) Ceric ammonium sulphate solution

- Dissolve 48 g ceric ammonium sulphate in 1 liter 3.5 N  $H_2SO_4$ . Store in a dark bottle away from light at room temperature. The solution is stable for months.

### e) Arsenious acid solution

- In a 2000 ml Erlenmeyer flask, place 20 g  $As_2O_3$  and 50 g NaCl, then slowly add 400 ml 5 N  $H_2SO_4$ . Add water to about 1 liter, heat gently to dissolve, cool to room temperature, dilute with water to 2 liters, filter, store in a dark bottle away from light at room temperature. The solution is stable for months.

|                                                                                   |                                          |                                |                |
|-----------------------------------------------------------------------------------|------------------------------------------|--------------------------------|----------------|
|  | Name of institute                        | Doc. number:                   | Version No: 3  |
|                                                                                   | <b>ETHIOPIAN PUBLIC HEALTH INSTITUTE</b> | EPHI/TL/FNL/T<br>M7.2-17       | Copy No. _____ |
| Document Title: <b>DETERMINATION OF IODINE IN URINE</b>                           |                                          | Effective date: December, 2020 |                |

## 6 Standards preparation

### a) Stock standard solution (1 mg/ml)

- Dissolve 0.1685 g  $KIO_3$  in deionized water to a final volume of 100 ml (1.68 g  $KIO_3$  contains 1.0 g iodine).  $KIO_3$  is preferred over KI because it is more stable. It may be more convenient to make a more concentrated solution, e.g., 10 or 100 mg iodine/ml.

### b) Intermediate standard solution (1 $\mu$ g/ml)

- Dilute 100  $\mu$ l stock iodine standard (1mg/ml) to 100 ml deionized water. Store in a dark bottle. The solution is stable for months. Useful standards are 20, 50, 100, 150, 200, and 300  $\mu$ g/l.

### c) Serial standard dilutions

- From intermediate standards, prepare 50, 100, 150, 200, and 250  $\mu$ g/L useful standards for calibration curve purposes.

**Note:** All standard solutions should store in a dark place. The solutions are stable for months.

## 7 Procedures

- Mix urine to suspend sediment using a vortex mixer.
- Pipette 250  $\mu$ l of each urine sample into a 13 x 100 mm test tube.
- Pipette 250  $\mu$ l each iodine serial standards also into a test tube.
- Add 1 ml 1.0 M ammonium persulfate solution to each tube.
- Vortex all tubes using a vortex mixer
- Heat all tubes for 60 minutes at 100° C in the oven.
- Cool tubes to room temperature in a fume hood.
- Add 2.5 ml arsenious acid solution. Mix by a vortex. Let stand for 15 minutes.
- Add 300  $\mu$ l of ceric ammonium sulfate solution to each tube (quickly mixing) at 15-30 second intervals between successive tubes. A stopwatch should be used for this. With practice, a 20-second interval is convenient.

|                                                                                   |                                                                   |                                                      |                                                       |
|-----------------------------------------------------------------------------------|-------------------------------------------------------------------|------------------------------------------------------|-------------------------------------------------------|
|  | Name of institute<br><br><b>ETHIOPIAN PUBLIC HEALTH INSTITUTE</b> | Doc. number:<br><br><b>EPHI/TL/FNL/T<br/>M7.2-17</b> | Version No: 3<br><br>Copy No. ____<br><br>Page 4 of 5 |
| Document Title: <b>DETERMINATION OF IODINE IN URINE</b>                           |                                                                   | Effective date: December, 2020                       |                                                       |

- Allow sitting at room temperature. Exactly 30 minutes after the addition of ceric ammonium sulfate to the first tube, read its absorbance by using UV-Vis spectrophotometer at 420 nm. Read successive tubes at the same interval as when adding the ceric ammonium sulfate.

## 8 Calculation

- Construct a standard curve on graph paper by plotting log absorbance of each concentration versus iodine concentration of each standard.
- Urinary Iodine in  $\mu\text{g/l} = ((\log A - b) / (m)) * 10$   
Where log A is log absorbance of sample, b is Y-intercept of the calibration graph, m is the slope of the graph, and 10 is used as a conversion factor when we prepare serials of standards in  $\mu\text{g/dl}$  (in this case we multiply the final concentration ( $\mu\text{g/dl}$ ) by 10 to get the concentration in  $\mu\text{g/l}$ ).

## 9 Quality control and safety precautions

- In each batch, the urine quality control sample (CRM or in-house prepared) should run together with sample and standards.
- While working the urine analysis and reagent preparation wear gloves, lab coat, eye goggle, lab shoe, and mouth cover.

**Remember:** During the analysis of iodine from urine, you should ensure that the laboratory working environment should free from salt samples (especially iodized salt samples) to avoid contamination.

**Limitations:** If the urine sample is analyzed at a high temperature the loss of iodine occurred and the method has to detect very low iodine concentration in urine.

## 10 References

- ICCIDD, UNICEF, WHO. Dunn JT et al. Methods for measuring iodine in urine. The Netherlands, ICCIDD, 1993.

1  
2  
3  
4  
5  
6  
7  
8  
9  
10  
11  
12  
13  
14  
15  
16  
17  
18  
19  
20  
21  
22  
23  
24  
25  
26  
27  
28  
29  
30  
31  
32  
33  
34  
35  
36  
37  
38  
39  
40  
41  
42  
43  
44  
45  
46  
47  
48  
49  
50  
51  
52  
53  
54  
55  
56  
57  
58  
59  
60

|                                                                                   |                                                                   |                                                  |                                     |
|-----------------------------------------------------------------------------------|-------------------------------------------------------------------|--------------------------------------------------|-------------------------------------|
|  | Name of institute<br><br><b>ETHIOPIAN PUBLIC HEALTH INSTITUTE</b> | Doc. number:<br><b>EPHI/TL/FNL/T<br/>M7.2-17</b> | Version No: 3<br><br>Copy No. _____ |
|                                                                                   |                                                                   | Page 5 of 5                                      |                                     |
| Document Title: <b>DETERMINATION OF IODINE IN URINE</b>                           |                                                                   | Effective date: December, 2020                   |                                     |

| Prepared by                       | Signature | Date  |
|-----------------------------------|-----------|-------|
| Prepared by: Nahom Tefera         | _____     | _____ |
| Reviewed by: Meseret W/yohannes   | _____     | _____ |
| Approved by: Dr. Masresha Tessema | _____     | _____ |

000333795190c501V10.0

# AAGP2

**cobas**<sup>®</sup>

## Tina-quant $\alpha$ 1-Acid Glycoprotein Gen.2

### Order information

| REF          | CONTENT                                                 | Analyzer(s) on which <b>cobas c</b> pack(s) can be used                      |
|--------------|---------------------------------------------------------|------------------------------------------------------------------------------|
| 0333795 190  | Tina-quant $\alpha$ 1-Acid Glycoprotein Gen.2 100 tests | System-ID 07 6758 1 Roche/Hitachi <b>cobas c</b> 311, <b>cobas c</b> 501/502 |
| 11355279 216 | Calibrator f.a.s. Proteins (5 x 1 mL)                   | Code 656                                                                     |
| 11355279 160 | Calibrator f.a.s. Proteins (5 x 1 mL, for USA)          | Code 656                                                                     |
| 10557897 122 | Precinorm Protein (3 x 1 mL)                            | Code 302                                                                     |
| 10557897 160 | Precinorm Protein (3 x 1 mL, for USA)                   | Code 302                                                                     |
| 11333127 122 | Precipath Protein (3 x 1 mL)                            | Code 303                                                                     |
| 11333127 160 | Precipath Protein (3 x 1 mL, for USA)                   | Code 303                                                                     |
| 05117003 190 | PreciControl ClinChem Multi 1 (20 x 5 mL)               | Code 391                                                                     |
| 05947626 190 | PreciControl ClinChem Multi 1 (4 x 5 mL)                | Code 391                                                                     |
| 05947626 160 | PreciControl ClinChem Multi 1 (4 x 5 mL, for USA)       | Code 391                                                                     |
| 05117216 190 | PreciControl ClinChem Multi 2 (20 x 5 mL)               | Code 392                                                                     |
| 05947774 190 | PreciControl ClinChem Multi 2 (4 x 5 mL)                | Code 392                                                                     |
| 05947774 160 | PreciControl ClinChem Multi 2 (4 x 5 mL, for USA)       | Code 392                                                                     |
| 04489357 190 | Diluent NaCl 9 % (50 mL)                                | System-ID 07 6869 3                                                          |

### English

#### System information

For **cobas c** 311/501 analyzers:

**AAGP2**: ACN 229

For **cobas c** 502 analyzer:

**AAGP2**: ACN 8229

#### Intended use

In vitro test for the quantitative determination of  $\alpha$ <sub>1</sub>-acid glycoprotein in human serum and plasma on Roche/Hitachi **cobas c** systems.

#### Summary<sup>1,2,3,4,5</sup>

$\alpha$ <sub>1</sub>-Acid glycoprotein is synthesized in hepatocytes and consists of a polypeptide chain having 5 carbohydrate chains N-glycosidically bonded to it (molar mass 41000 daltons). Structurally, it belongs to the lipocalin superfamily of secretory proteins (such as  $\alpha$ <sub>1</sub>-microglobulin and retinol-binding protein).  $\alpha$ <sub>1</sub>-Acid glycoprotein promotes fibroblast growth and interacts with collagen.

It is a sensitive acute phase reactant whose concentration can increase by a factor of 3 within 24-48 hours when inflammation occurs.  $\alpha$ <sub>1</sub>-Acid glycoprotein can also be used to differentiate between acute phase reactions (elevated serum level) and estrogen effects (normal or decreased serum level) whereas the serum level of other positive reactants such as ceruloplasmin and haptoglobin increases during such reactions. Along with haptoglobin it is perhaps the best protein for identifying slight in vivo hemolysis. An increased  $\alpha$ <sub>1</sub>-acid glycoprotein level and normal haptoglobin values indicate an acute phase reaction with concomitant slight in vivo hemolysis. Moderate and isolated increases occur when glomerular filtration is inhibited in the early stages of uremia. The determination is used in the assessment of the activity of acute and recurring inflammations as well as of tumors with cell necrosis.

Various assay methods for  $\alpha$ <sub>1</sub>-acid glycoprotein determination are available such as kinetic nephelometry, radial immunodiffusion (RID) and turbidimetry. The Roche  $\alpha$ <sub>1</sub>-acid glycoprotein assay is based on the principle of immunological agglutination.

#### Test principle<sup>2</sup>

Immunoturbidimetric assay.

Anti- $\alpha$ <sub>1</sub>-acid glycoprotein antibodies react with antigen in the sample to form an antigen/antibody complex. Following agglutination, this is measured turbidimetrically.

#### Reagents - working solutions

**R1** TRIS buffer: 50 mmol/L, pH 8.0; NaCl: 300 mmol/L; PEG: 7 %; preservative; stabilizer

**R2** Polyclonal anti-human  $\alpha$ <sub>1</sub>-acid glycoprotein antibody (goat): dependent on titer; TRIS buffer: 13 mmol/L, pH 7.5; NaCl: 198 mmol/L; preservative

R1 is in position B and R2 is in position C.

#### Precautions and warnings

For in vitro diagnostic use.

Exercise the normal precautions required for handling all laboratory reagents.

Disposal of all waste material should be in accordance with local guidelines. Safety data sheet available for professional user on request.

For USA: Caution: Federal law restricts this device to sale by or on the order of a physician.

#### Reagent handling

Ready for use

#### Storage and stability

**AAGP2**

Shelf life at 2-8 °C:

See expiration date on **cobas c** pack label.

On-board in use and refrigerated on the analyzer:

12 weeks

*Diluent NaCl 9 %*

Shelf life at 2-8 °C:

See expiration date on **cobas c** pack label.

On-board in use and refrigerated on the analyzer:

12 weeks

#### Specimen collection and preparation

For specimen collection and preparation only use suitable tubes or collection containers.

Only the specimens listed below were tested and found acceptable. Serum

Plasma: Li-heparin and K<sub>2</sub>-EDTA plasma.

The sample types listed were tested with a selection of sample collection tubes that were commercially available at the time of testing, i.e. not all available tubes of all manufacturers were tested. Sample collection systems from various manufacturers may contain differing materials which could affect the test results in some cases. When processing samples in primary tubes (sample collection systems), follow the instructions of the tube manufacturer.

Centrifuge samples containing precipitates before performing the assay.

Stability:<sup>6</sup> < 72 hours at 4 °C

6 months at -20 °C



000333795190c501V10.0

# AAGP2

## Tina-quant $\alpha$ 1-Acid Glycoprotein Gen.2

**cobas**<sup>®</sup>

For diagnostic purposes, the results should always be assessed in conjunction with the patient's medical history, clinical examination and other findings.

### ACTION REQUIRED

**Special Wash Programming:** The use of special wash steps is mandatory when certain test combinations are run together on Roche/Hitachi **cobas c** systems. The latest version of the carry-over evasion list can be found with the NaOHD-SMS-SmpCin1+2-SCCS Method Sheets. For further instructions refer to the operator's manual. **cobas c** 502 analyzer: All special wash programming necessary for avoiding carry-over is available via the **cobas** link, manual input is not required.

**Where required, special wash/carry-over evasion programming must be implemented prior to reporting results with this test.**

### Limits and ranges

#### Measuring range

0.1-4.0 g/L (2.5-100  $\mu$ mol/L, 10-400 mg/dL)

Determine samples having higher concentrations via the rerun function. Dilution of samples via the rerun function is a 1:1.5 dilution. Results from samples diluted using the rerun function are automatically multiplied by a factor of 1.5.

#### Lower limits of measurement

##### Lower detection limit of the test

0.1 g/L (2.5  $\mu$ mol/L, 10 mg/dL)

The lower detection limit represents the lowest measurable analyte level that can be distinguished from zero. It is calculated as the value lying 3 standard deviations above that of the lowest standard (standard 1 + 3 SD, repeatability, n = 21).

#### Expected values<sup>12</sup>

0.5-1.2 g/L (12.5-30  $\mu$ mol/L, 50-120 mg/dL)

Each laboratory should investigate the transferability of the expected values to its own patient population and if necessary determine its own reference ranges.

#### Specific performance data

Representative performance data on the analyzers are given below. Results obtained in individual laboratories may differ.

#### Precision

Precision was determined using human samples and controls in an internal protocol with repeatability (n = 21) and intermediate precision (3 aliquots per run, 1 run per day, 21 days). The following results were obtained:

| Repeatability          | Mean                         | SD                           | CV  |
|------------------------|------------------------------|------------------------------|-----|
|                        | g/L ( $\mu$ mol/L,<br>mg/dL) | g/L ( $\mu$ mol/L,<br>mg/dL) | %   |
| Precinorm Protein      | 0.724 (18.1, 72.4)           | 0.00 (0.0, 0.0)              | 0.6 |
| Precipath Protein      | 1.21 (30.3, 121)             | 0.01 (0.3, 1)                | 0.5 |
| Human serum 1          | 0.642 (16.1, 64.2)           | 0.00 (0.0, 0.0)              | 0.7 |
| Human serum 2          | 1.07 (26.8, 107)             | 0.01 (0.3, 1)                | 0.7 |
| Intermediate precision | Mean                         | SD                           | CV  |
|                        | g/L ( $\mu$ mol/L,<br>mg/dL) | g/L ( $\mu$ mol/L,<br>mg/dL) | %   |
| Precinorm Protein      | 0.710 (17.8, 71.0)           | 0.007 (0.2, 1.0)             | 0.9 |
| Precipath Protein      | 1.19 (30.0, 119)             | 0.01 (0.3, 1)                | 0.9 |
| Human serum 3          | 0.660 (16.5, 66.0)           | 0.010 (0.3, 1.0)             | 1.5 |
| Human serum 4          | 1.21 (30.3, 121)             | 0.02 (0.5, 2)                | 1.5 |

#### Method comparison

$\alpha$ <sub>1</sub>-Acid glycoprotein values for human serum and plasma samples obtained on a Roche/Hitachi **cobas c** 501 analyzer (y) were compared with those determined using the corresponding reagent on a Roche/Hitachi 917 analyzer (x).

Sample size (n) = 119

Passing/Bablok<sup>13</sup>                      Linear regression

$$y = 1.012x - 0.070 \text{ g/L}$$

$$\tau = 0.973$$

$$y = 0.998x - 0.056 \text{ g/L}$$

$$r = 0.999$$

The sample concentrations were between 0.489 and 3.25 g/L (12.2 and 81.3  $\mu$ mol/L, 48.9 and 325 mg/dL).

### References

- Schmid K.  $\alpha$ 1-Acid glycoprotein. In: The Plasma Proteins, 2nd ed. Putnam FW, ed. New York: Academic Press 1975;183-228.
- Greiling H, Gressner AM, eds. Lehrbuch der Klinischen Chemie und Pathobiochemie, 3rd ed. Stuttgart/New York: Schattauer Verlag 1995:236.
- Tietz NW, ed. Clinical Guide to Laboratory Tests, 3rd ed. Philadelphia, PA: WB Saunders Company 1995;66-67.
- Ganrot K. Plasma protein pattern in acute infectious disease. Scand J Clin Lab Invest 1974;34:75-81.
- Lievens M, Bienvenu J, Buitrago JMG, et al. Evaluation of four new Tina-quant assays for determination of  $\alpha$ 1-acid glycoprotein,  $\alpha$ 1-antitrypsin, haptoglobin and prealbumin. Clin Lab 1996;42:515-520.
- Wu AHB, ed. Tietz Clinical Guide to Laboratory Tests, 4th ed. St. Louis (MO): Saunders Elsevier 2006:42.
- Baudner S, Bienvenu J, Blirup-Jensen S, et al. The certification of a matrix reference material for immunochemical measurement of 14 human serum proteins CRM470. Report EUR 15243 EN 1993;1-186.
- Glick MR, Ryder KW, Jackson SA. Graphical Comparisons of Interferences in Clinical Chemistry Instrumentation. Clin Chem 1986;32:470-475.
- Breuer J. Report on the Symposium "Drug effects in Clinical Chemistry Methods". Eur J Clin Chem Clin Biochem 1996;34:385-386.
- Sonntag O, Scholer A. Drug interference in clinical chemistry: recommendation of drugs and their concentrations to be used in drug interference studies. Ann Clin Biochem 2001;38:376-385.
- Bakker AJ, Mücke M. Gammopathy interference in clinical chemistry assays: mechanisms, detection and prevention. Clin Chem Lab Med 2007;45(9):1240-1243.
- Dati F, Schumann G, Thomas L, et al. Consensus of a group of professional societies and diagnostic companies on guidelines for interim reference ranges for 14 proteins in serum based on the standardization against the IFCC/BCR/CAP reference material (CRM 470). Eur J Clin Chem Clin Biochem 1996;34:517-520.
- Bablok W, Passing H, Bender R, et al. A general regression procedure for method transformation. Application of linear regression procedures for method comparison studies in clinical chemistry, Part III. J Clin Chem Clin Biochem 1988 Nov;26(11):783-790.

A point (period/stop) is always used in this Method Sheet as the decimal separator to mark the border between the integral and the fractional parts of a decimal numeral. Separators for thousands are not used.

### Symbols

Roche Diagnostics uses the following symbols and signs in addition to those listed in the ISO 15223-1 standard (for USA: see <https://usdiagnostics.roche.com> for definition of symbols used):

**CONTENT**

Contents of kit

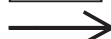

Volume after reconstitution or mixing

**GTIN**

Global Trade Item Number



000333795190c501V10.0

# AAGP2

## Tina-quant $\alpha$ 1-Acid Glycoprotein Gen.2

**cobas**<sup>®</sup>

### FOR US CUSTOMERS ONLY: LIMITED WARRANTY

Roche Diagnostics warrants that this product will meet the specifications stated in the labeling when used in accordance with such labeling and will be free from defects in material and workmanship until the expiration date printed on the label. THIS LIMITED WARRANTY IS IN LIEU OF ANY OTHER WARRANTY, EXPRESS OR IMPLIED, INCLUDING ANY IMPLIED WARRANTY OF MERCHANTABILITY OR FITNESS FOR PARTICULAR PURPOSE. IN NO EVENT SHALL ROCHE DIAGNOSTICS BE LIABLE FOR INCIDENTAL, INDIRECT, SPECIAL OR CONSEQUENTIAL DAMAGES.

COBAS, COBAS C, PRECICONTROL, PRECINORM, PRECIPATH and TINA-QUANT are trademarks of Roche.

All other product names and trademarks are the property of their respective owners.

Additions, deletions or changes are indicated by a change bar in the margin.

© 2017, Roche Diagnostics

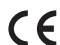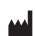

Roche Diagnostics GmbH, Sandhofer Strasse 116, D-68305 Mannheim  
www.roche.com

Distribution in USA by:  
Roche Diagnostics, Indianapolis, IN  
US Customer Technical Support 1-800-428-2336

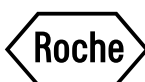

For peer review only

ms\_05894913190V7.0

# Vitamin D total



## 25-Hydroxyvitamin D

| REF          | $\Sigma$ | SYSTEM                                                                                                   |
|--------------|----------|----------------------------------------------------------------------------------------------------------|
| 05894913 190 | 100      | Elecsys 2010<br>MODULAR ANALYTICS E170<br><b>cobas e 411</b><br><b>cobas e 601</b><br><b>cobas e 602</b> |

### English

#### Intended use

This assay is intended for the quantitative determination of total 25-hydroxyvitamin D in human serum and plasma. This assay is to be used as an aid in the assessment of vitamin D sufficiency.

The electrochemiluminescence binding assay is intended for use on Elecsys and **cobas e** immunoassay analyzers.

#### Summary

Vitamin D is a fat-soluble steroid hormone precursor that is mainly produced in the skin by exposure to sunlight. Vitamin D is biologically inert and must undergo two successive hydroxylations in the liver and kidney to become the biologically active 1,25-dihydroxyvitamin D.<sup>1</sup>

The two most important forms of vitamin D are vitamin D<sub>3</sub> (cholecalciferol) and vitamin D<sub>2</sub> (ergocalciferol). In contrast to vitamin D<sub>3</sub>, the human body cannot produce vitamin D<sub>2</sub> which is taken up with fortified food or given by supplements. In human plasma vitamin D<sub>3</sub> and D<sub>2</sub> are bound to the vitamin D binding protein and transported to the liver where both are hydroxylated to form vitamin D (25-OH), i.e. 25-hydroxyvitamin D. It is commonly agreed that vitamin D (25-OH) is the metabolite to determine the overall vitamin D status as it is the major storage form of vitamin D in the human body. This primary circulating form of vitamin D is biologically inactive with levels approximately 1000-fold greater than the circulating 1,25-dihydroxyvitamin D. The half-life of circulating vitamin D (25-OH) is 2-3 weeks.

Most of the vitamin D (25-OH), measurable in serum, is vitamin D<sub>3</sub> (25-OH) whereas vitamin D<sub>2</sub> (25-OH) reaches measurable levels only in patients taking vitamin D<sub>2</sub> supplements.<sup>2,3,4</sup> Vitamin D<sub>2</sub> is considered to be less effective.<sup>5</sup>

Vitamin D is essential for bone health. In children, severe deficiency leads to bone-malformation, known as rickets. Milder degrees of insufficiency are believed to cause reduced efficiency in the utilization of dietary calcium.<sup>6</sup> Vitamin D deficiency causes muscle weakness; in elderly, the risk of falling has been attributed to the effect of vitamin D on muscle function.<sup>7</sup> Vitamin D deficiency is a common cause of secondary hyperparathyroidism.<sup>8,9</sup> Elevations of PTH levels, especially in elderly vitamin D deficient adults can result in osteomalacia, increased bone turnover, reduced bone mass and risk of bone fractures.<sup>10</sup> Low vitamin D (25-OH) concentrations are also associated with lower bone mineral density.<sup>11</sup> In conjunction with other clinical data, the results may be used as an aid in the assessment of bone metabolism.

So far, vitamin D has been shown to affect expression of over 200 different genes. Insufficiency has been linked to diabetes, different forms of cancer, cardiovascular disease, autoimmune diseases and innate immunity.<sup>2</sup>

The Elecsys Vitamin D total assay employs a vitamin D binding protein (VDBP) as capture protein to bind vitamin D<sub>3</sub> (25-OH) and vitamin D<sub>2</sub> (25-OH).

#### Test principle

Competition principle. Total duration of assay: 27 minutes.

- 1st incubation: By incubating the sample (15  $\mu$ L) with pretreatment reagent 1 and 2, bound vitamin D (25-OH) is released from the vitamin D binding protein.
- 2nd incubation: By incubating the pretreated sample with the ruthenium labeled vitamin D binding protein, a complex between the vitamin D (25-OH) and the ruthenylated vitamin D binding protein is formed.

- 3rd incubation: After addition of streptavidin-coated microparticles and vitamin D (25-OH) labeled with biotin, unbound ruthenium labeled vitamin D binding proteins become occupied. A complex consisting of the ruthenylated vitamin D binding protein and the biotinylated vitamin D (25-OH) is formed and becomes bound to the solid phase via interaction of biotin and streptavidin.
- The reaction mixture is aspirated into the measuring cell where the microparticles are magnetically captured onto the surface of the electrode. Unbound substances are then removed with ProCell/ProCell M. Application of a voltage to the electrode then induces chemiluminescent emission which is measured by a photomultiplier.
- Results are determined via a calibration curve which is instrument-specifically generated by 2-point calibration and a master curve provided via the reagent barcode.

#### Reagents - working solutions

The reagent rackpack (M, R1, R2) and the pretreatment reagents (PT1, PT2) are labeled as VITD-T.

PT1 Pretreatment reagent 1 (white cap), 1 bottle, 4 mL:

Dithiothreitol 1 g/L, pH 5.5.

PT2 Pretreatment reagent 2 (gray cap), 1 bottle, 4 mL:

Sodium hydroxide 55 g/L.

M Streptavidin-coated microparticles (transparent cap), 1 bottle, 6.5 mL:

Streptavidin-coated microparticles 0.72 mg/mL; preservative.

R1 Vitamin D binding protein-BPRu (gray cap), 1 bottle, 9 mL:

Ruthenium labeled vitamin D binding protein 150  $\mu$ g/L; bis-tris propane buffer 200 mmol/L; albumin (human) 25 g/L; pH 7.5; preservative.

R2 25-hydroxyvitamin D~biotin (black cap), 1 bottle, 8.5 mL:

Biotinylated vitamin D (25-OH) 14  $\mu$ g/L; bis-tris propane buffer 200 mmol/L; pH 8.6; preservative.

#### Precautions and warnings

For in vitro diagnostic use.

Exercise the normal precautions required for handling all laboratory reagents.

Disposal of all waste material should be in accordance with local guidelines. Safety data sheet available for professional user on request.

This kit contains components classified as follows in accordance with the Regulation (EC) No. 1272/2008:

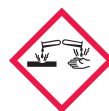

Danger

H290 May be corrosive to metals.

H314 Causes severe skin burns and eye damage.

#### Prevention:

P280 Wear protective gloves/ protective clothing/ eye protection/ face protection.

#### Response:

ms\_05894913190V7.0

# Vitamin D total

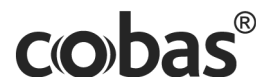

## 25-Hydroxyvitamin D

P303 + P361 IF ON SKIN (or hair): Remove/Take off immediately all contaminated clothing. Rinse skin with water/shower.  
+ P353

P304 + P340 IF INHALED: Remove person to fresh air and keep comfortable for breathing.  
+ P310 Immediately call a POISON CENTER or doctor/physician.

P305 + P351 IF IN EYES: Rinse cautiously with water for several minutes. Remove contact lenses, if present and easy to do.  
+ P338 + P310 Continue rinsing. Immediately call a POISON CENTER or doctor/physician.

Product safety labeling primarily follows EU GHS guidance.

Contact phone: all countries: +49-621-7590

All human material should be considered potentially infectious. All products derived from human blood are prepared exclusively from the blood of donors tested individually and shown to be free from HBsAg and antibodies to HCV and HIV. The testing methods applied were FDA-approved or cleared in compliance with the European Directive 98/79/EC, Annex II, List A.

However, as no testing method can rule out the potential risk of infection with absolute certainty, the material should be handled with the same level of care as a patient specimen. In the event of exposure, the directives of the responsible health authorities should be followed.<sup>12,13</sup>

Avoid foam formation in all reagents and sample types (specimens, calibrators and controls).

### Reagent handling

The reagents in the kit have been assembled into a ready-for-use unit that cannot be separated.

All information required for correct operation is read in from the respective reagent barcodes.

### Storage and stability

Store at 2-8 °C.

Do not freeze.

Store the Elecsys reagent kit **upright** in order to ensure complete availability of the microparticles during automatic mixing prior to use.

| Stability:                                                           |                                  |
|----------------------------------------------------------------------|----------------------------------|
| unopened at 2-8 °C                                                   | up to the stated expiration date |
| after opening at 2-8 °C                                              | 56 days (8 weeks)                |
| on Elecsys 2010 and <b>cobas e 411</b>                               | 21 days (3 weeks)                |
| on MODULAR ANALYTICS E170, <b>cobas e 601</b> and <b>cobas e 602</b> | 28 days (4 weeks)                |

### Specimen collection and preparation

Only the specimens listed below were tested and found acceptable.

Serum collected using standard sampling tubes or tubes containing separating gel.

Li-heparin, K<sub>2</sub>- and K<sub>3</sub>-EDTA plasma as well as Li-heparin plasma tubes containing separating gel.

Criterion: Method comparison serum versus plasma, slope 0.9-1.1 + intercept within  $< \pm 2 \times \text{LoB} + \text{coefficient of correlation} > 0.9$ .

Serum, Li-heparin, K<sub>2</sub>- and K<sub>3</sub>-EDTA plasma: Vitamin D (25-OH) is stable for 8 hours at 18-25 °C, 4 days at 2-8 °C, 24 weeks at -20 °C.

The stability of vitamin D (25-OH) found with the Elecsys Vitamin D total assay is in line with earlier studies using a vitamin D binding protein assay and mass spectrometry.<sup>14</sup>

The sample types listed were tested with a selection of sample collection tubes that were commercially available at the time of testing, i.e. not all available tubes of all manufacturers were tested. Sample collection systems from various manufacturers may contain differing materials which could affect the test results in some cases. When processing samples in primary tubes (sample collection systems), follow the instructions of the tube manufacturer.

Centrifuge samples containing precipitates before performing the assay.

Do not use heat-inactivated samples.

Do not use samples and controls stabilized with azide.

Ensure the samples, calibrators and controls are at 20-25 °C prior to measurement.

Due to possible evaporation effects, samples, calibrators and controls on the analyzers should be analyzed/measured within 2 hours.

### Materials provided

See "Reagents – working solutions" section for reagents.

### Materials required (but not provided)

- [REF] 05894921190, Vitamin D total CalSet, for 4 x 1 mL
  - [REF] 05618860190, PreciControl Varia, for 2 x 3 mL each of PreciControl Varia 1 and 2
  - [REF] 11732277122, Diluent Universal, 2 x 16 mL sample diluent or [REF] 03183971122, Diluent Universal, 2 x 36 mL sample diluent
  - General laboratory equipment
  - Elecsys 2010, MODULAR ANALYTICS E170 or **cobas e** analyzer
- Accessories for Elecsys 2010 and **cobas e 411** analyzers:
- [REF] 11662988122, ProCell, 6 x 380 mL system buffer
  - [REF] 11662970122, CleanCell, 6 x 380 mL measuring cell cleaning solution
  - [REF] 11930346122, Elecsys SysWash, 1 x 500 mL washwater additive
  - [REF] 11933159001, Adapter for SysClean
  - [REF] 11706802001, Elecsys 2010 AssayCup, 60 x 60 reaction vessels
  - [REF] 11706799001, Elecsys 2010 AssayTip, 30 x 120 pipette tips
- Accessories for MODULAR ANALYTICS E170, **cobas e 601** and **cobas e 602** analyzers:

- [REF] 04880340190, ProCell M, 2 x 2 L system buffer
  - [REF] 04880293190, CleanCell M, 2 x 2 L measuring cell cleaning solution
  - [REF] 03023141001, PC/CC-Cups, 12 cups to prewarm ProCell M and CleanCell M before use
  - [REF] 03005712190, ProbeWash M, 12 x 70 mL cleaning solution for run finalization and rinsing during reagent change
  - [REF] 03004899190, PreClean M, 5 x 600 mL detection cleaning solution
  - [REF] 12102137001, AssayTip/AssayCup Combimagazine M, 48 magazines x 84 reaction vessels or pipette tips, waste bags
  - [REF] 03023150001, WasteLiner, waste bags
  - [REF] 03027651001, SysClean Adapter M
- Accessories for all analyzers:
- [REF] 11298500316, ISE Cleaning Solution/Elecsys SysClean, 5 x 100 mL system cleaning solution

### Assay

For optimum performance of the assay follow the directions given in this document for the analyzer concerned. Refer to the appropriate operator's manual for analyzer-specific assay instructions.

Resuspension of the microparticles takes place automatically prior to use. Read in the test-specific parameters via the reagent barcode. If in exceptional cases the barcode cannot be read, enter the 15-digit sequence of numbers.

MODULAR ANALYTICS E170, **cobas e 601** and **cobas e 602** analyzers: PreClean M solution is necessary.

Bring the cooled reagents to approximately 20 °C and place on the reagent disk (20 °C) of the analyzer. Avoid foam formation. The system automatically regulates the temperature of the reagents and the opening/closing of the bottles.

### Calibration

Traceability: This method has been standardized against LC-MS/MS<sup>15</sup> which in turn has been standardized to the NIST standard.<sup>16</sup>

Every Elecsys reagent set has a barcoded label containing specific information for calibration of the particular reagent lot. The predefined master curve is adapted to the analyzer using the relevant CalSet.



ms\_05894913190V7.0

# Vitamin D total



## 25-Hydroxyvitamin D

### Precision

Precision was determined using Elecsys reagents, pooled human sera and controls in a protocol (EP5-A2) of the CLSI (Clinical and Laboratory Standards Institute): 2 runs per day in duplication each for 21 days (n = 84). The following results were obtained:

| Elecsys 2010 and cobas e 411 analyzers |       |        |               |        |     |
|----------------------------------------|-------|--------|---------------|--------|-----|
| Sample                                 | Mean  |        | Repeatability |        |     |
|                                        |       |        | SD            |        | CV  |
|                                        | ng/mL | nmol/L | ng/mL         | nmol/L | %   |
| HS <sup>a)</sup> 1                     | 6.76  | 16.9   | 0.525         | 1.31   | 7.8 |
| HS 2                                   | 15.0  | 37.5   | 0.770         | 1.93   | 5.1 |
| HS 3                                   | 28.0  | 70.0   | 0.860         | 2.15   | 3.1 |
| HS 4                                   | 67.0  | 168    | 1.15          | 2.88   | 1.7 |
| PC <sup>b)</sup> Varia 1               | 19.9  | 49.8   | 0.948         | 2.37   | 4.8 |
| PC Varia 2                             | 38.3  | 95.8   | 1.05          | 2.63   | 2.7 |

a) HS = human serum

b) PC = PreciControl

| Elecsys 2010 and cobas e 411 analyzers |       |        |                        |        |      |
|----------------------------------------|-------|--------|------------------------|--------|------|
| Sample                                 | Mean  |        | Intermediate precision |        |      |
|                                        |       |        | SD                     |        | CV   |
|                                        | ng/mL | nmol/L | ng/mL                  | nmol/L | %    |
| HS 1                                   | 6.76  | 16.9   | 0.724                  | 1.81   | 10.7 |
| HS 2                                   | 15.0  | 37.5   | 1.28                   | 3.20   | 8.5  |
| HS 3                                   | 28.0  | 70.0   | 1.46                   | 3.65   | 5.2  |
| HS 4                                   | 67.0  | 168    | 1.46                   | 3.65   | 2.2  |
| PC Varia 1                             | 19.9  | 49.8   | 1.23                   | 3.08   | 6.2  |
| PC Varia 2                             | 38.3  | 95.8   | 1.41                   | 3.53   | 3.7  |

| MODULAR ANALYTICS E170, cobas e 601 and cobas e 602 analyzers |       |        |               |        |     |
|---------------------------------------------------------------|-------|--------|---------------|--------|-----|
| Sample                                                        | Mean  |        | Repeatability |        |     |
|                                                               |       |        | SD            |        | CV  |
|                                                               | ng/mL | nmol/L | ng/mL         | nmol/L | %   |
| HS 1                                                          | 8.35  | 20.9   | 0.567         | 1.42   | 6.8 |
| HS 2                                                          | 15.8  | 39.5   | 0.824         | 2.06   | 5.2 |
| HS 3                                                          | 28.3  | 70.8   | 1.11          | 2.78   | 3.9 |
| HS 4                                                          | 69.6  | 174    | 1.50          | 3.75   | 2.2 |
| PC Varia 1                                                    | 20.2  | 50.5   | 0.924         | 2.31   | 4.6 |
| PC Varia 2                                                    | 39.6  | 99.0   | 1.06          | 2.65   | 2.7 |

| MODULAR ANALYTICS E170, cobas e 601 and cobas e 602 analyzers |       |        |                        |        |      |
|---------------------------------------------------------------|-------|--------|------------------------|--------|------|
| Sample                                                        | Mean  |        | Intermediate precision |        |      |
|                                                               |       |        | SD                     |        | CV   |
|                                                               | ng/mL | nmol/L | ng/mL                  | nmol/L | %    |
| HS 1                                                          | 8.35  | 20.9   | 1.10                   | 2.75   | 13.1 |
| HS 2                                                          | 15.8  | 39.5   | 1.18                   | 2.95   | 7.5  |
| HS 3                                                          | 28.3  | 70.8   | 1.83                   | 4.58   | 6.5  |
| HS 4                                                          | 69.6  | 174    | 2.37                   | 5.93   | 3.4  |
| PC Varia 1                                                    | 20.2  | 50.5   | 0.954                  | 2.39   | 4.7  |
| PC Varia 2                                                    | 39.6  | 99.0   | 1.38                   | 3.45   | 3.5  |

### Method comparison

1) A comparison of the Elecsys Vitamin D total assay (y) using samples measured with LC-MS/MS (x) gave the following correlations (ng/mL):

Number of samples measured: 903

Passing/Bablok<sup>24</sup>  $y = 1.09x - 0.510$

Pearson  $r = 0.894$

The sample concentrations were between approximately 3 ng/mL (7.5 nmol/L) and 81 ng/mL (203 nmol/L).

2) A comparison of the Elecsys Vitamin D total assay (y) using samples measured with a commercially available vitamin D (25-OH) immunoassay (x) gave the following correlations (ng/mL):

Number of samples measured: 451

Passing/Bablok<sup>24</sup>  $y = 1.29x + 1.71$

Pearson  $r = 0.803$

The sample concentrations were between approximately 5 ng/mL (12.5 nmol/L) and 81 ng/mL (203 nmol/L).

### Analytical specificity

The specificity was assessed at 50 % B<sub>0</sub> and the results are summarized in the following table:

| Cross-reactant                                | Cross-reactivity (%) |
|-----------------------------------------------|----------------------|
| 25-hydroxyvitamin D <sub>3</sub>              | 100                  |
| 25-hydroxyvitamin D <sub>2</sub>              | 92                   |
| 24,25-dihydroxyvitamin D <sub>3</sub>         | 149                  |
| C3-epimer of 25-hydroxyvitamin D <sub>3</sub> | 91                   |
| 1,25-dihydroxyvitamin D <sub>3</sub>          | non detectable       |
| 1,25-dihydroxyvitamin D <sub>2</sub>          | non detectable       |
| Vitamin D <sub>3</sub>                        | non detectable       |
| Vitamin D <sub>2</sub>                        | non detectable       |

### Functional sensitivity

The functional sensitivity is the lowest analyte concentration that can be reproducibly measured with an intermediate precision CV of ≤ 20 %. 8 samples with concentrations between 0.722 ng/mL and 10.1 ng/mL were measured on several days. The functional sensitivity was determined to be 4.01 ng/mL (CV 18.5 %).

### References

- Holick M. Vitamin D: the underappreciated D-lightful hormone that is important for skeletal and cellular health. *Curr Opin Endocrinol Diabetes* 2002;9(1):87-98.
- Holick MF. Vitamin D deficiency. *N Engl J Med* 2007;357:266-281.
- Houghton LA, Vieth R. The case against ergocalciferol (vitamin D2) as a vitamin supplement. *Am J Clin Nutr* 2006;84:694-697.
- Hart GR, Furniss JL, Laurie D, et al. Measurement of vitamin D Status: background, clinical use and methodologies. *Clin Lab* 2006;52(7-8):335-343.
- Armas LAG, Hollis BW, Heaney RP. Vitamin D2 is much less effective than Vitamin D3 in humans. *J Clin Endocrinol Metab* 2004;89(11):5387-5391.
- Steingrimsdottir L, Gunnarsson O, Indridason OS, et al. Relationship between serum parathyroid hormone levels, vitamin D sufficiency, and calcium intake. *JAMA* 2005 Nov 9;294(18):2336-2341.
- Venning G. Recent developments in vitamin D deficiency and muscle weakness among elderly people. *BMJ* 2005;330:524-526.
- Lips P. Vitamin D deficiency and secondary hyperparathyroidism in the elderly: consequences for bone loss and fractures and therapeutic implications. *Endocr Rev* 2001 Aug;22(4):447-501.
- Souberbielle JC, Lawson-Body E, Hammadi B, et al. The use in clinical practice of parathyroid hormone normative values established in vitamin D-sufficient subjects. *J Clin Endocrinol Metab* 2003 Aug;88(8):3501-3504.
- Willett AM. Vitamin D status and its relationship with parathyroid hormone and bone mineral status in older adolescents. *Proceeding of the Nutrition Society* 2005;64:193-203.

ms\_05894913190V7.0

# Vitamin D total

## 25-Hydroxyvitamin D


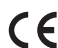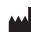

Roche Diagnostics GmbH, Sandhofer Strasse 116, D-68305 Mannheim  
www.roche.com

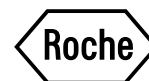

- 11 Kuchukk NO, van Schoor NM, Pluijm SM, et al. Vitamin D status, parathyroid function, bone turnover, and BMD in postmenopausal women with osteoporosis: global perspective. *J Bone Miner Res* 2009;24:693-701.
- 12 Occupational Safety and Health Standards: Bloodborne pathogens. (29 CFR Part 1910.1030). Fed. Register.
- 13 Directive 2000/54/EC of the European Parliament and Council of 18 September 2000 on the protection of workers from risks related to exposure to biological agents at work.
- 14 Lewis JG, Elder PA. Serum 25-OH Vitamin D2 and D3 are Stable under Exaggerated Conditions. *Clin Chem* 2008;54:1931-1932.
- 15 Vogeser M, Kyriatsoulis A, Huber E, et al. Candidate Reference Method for the Quantification of Circulating 25-Hydroxyvitamin D3 by Liquid Chromatography-Tandem Mass Spectrometry. *Clin Chem* 2004;50:1415-1417.
- 16 Phinney KW. Development of a standard reference material for vitamin D in serum. *Am J Clin Nutr* 2008;88(suppl):511-512.
- 17 Bischoff-Ferrari HA, Giovannucci E, Willett WC, et al. Estimation of optimal serum concentrations of 25-hydroxyvitamin D for multiple health outcomes. *Am J Clin Nutr* 2006;84:18-28.
- 18 Holick MF. Vitamin D status: measurement, interpretation, and clinical application. *Ann Epidemiol* 2009;19(2):73-78.
- 19 KDOQI Clinical Practice Guidelines for Bone Metabolism and Disease in Children With Chronic Kidney Disease.  
[http://www.kidney.org/PROFESSIONALS/kdoqi/guidelines\\_pedbone/guide8.htm](http://www.kidney.org/PROFESSIONALS/kdoqi/guidelines_pedbone/guide8.htm)
- 20 Souberbielle JC, Body JJ, Lappe JM, et al. Vitamin D and musculoskeletal health, cardiovascular disease, autoimmunity and cancer: Recommendations for clinical practice. *Autoimmun Rev* 2010;9:709-715.
- 21 Dawson-Hughes B, Heaney RP, Holick MF, et al. Estimates of optimal vitamin D status. *Osteoporos Int* 2005;16:713-716.
- 22 Vieth R. Why the minimum desirable serum 25-hydroxyvitamin D level should be 75 nmol/L (30 ng/mL). *Best Pract Res Clin Endocrinol Metab* 2011;25(4):681-691.
- 23 Heijboer AC, Blankenstein MA, Kema IP, et al. Accuracy of 6 routine 25-hydroxyvitamin D assays: influence of vitamin D binding protein concentration. *Clin Chem* 2012;58:543-548.
- 24 Bablok W, Passing H, Bender R, et al. A general regression procedure for method transformation. Application of linear regression procedures for method comparison studies in clinical chemistry, Part III. *J Clin Chem Clin Biochem* 1988 Nov;26(11):783-790.

For further information, please refer to the appropriate operator's manual for the analyzer concerned, the respective application sheets, the product information and the Method Sheets of all necessary components (if available in your country).

A point (period/stop) is always used in this Method Sheet as the decimal separator to mark the border between the integral and the fractional parts of a decimal numeral. Separators for thousands are not used.

### Symbols

Roche Diagnostics uses the following symbols and signs in addition to those listed in the ISO 15223-1 standard.

|                                                                                     |                                                     |
|-------------------------------------------------------------------------------------|-----------------------------------------------------|
|  | Contents of kit                                     |
|  | Analyzers/Instruments on which reagents can be used |
|  | Reagent                                             |
|  | Calibrator                                          |
|  | Volume after reconstitution or mixing               |
|  | Global Trade Item Number                            |

COBAS, COBAS E, ELECSYS and PRECICONTROL are trademarks of Roche. INTRALIPID is a trademark of Fresenius Kabi AB.

All other product names and trademarks are the property of their respective owners.

Additions, deletions or changes are indicated by a change bar in the margin.

© 2015, Roche Diagnostics

ms\_07212771190V1.0

# Vitamin B12 II

## Vitamin B12

| REF          |     | SYSTEM                                                                                                   |
|--------------|-----|----------------------------------------------------------------------------------------------------------|
| 07212771 190 | 100 | Elecsys 2010<br>MODULAR ANALYTICS E170<br><b>cobas e 411</b><br><b>cobas e 601</b><br><b>cobas e 602</b> |

### English

#### Intended use

Binding assay for the in vitro quantitative determination of vitamin B12 in human serum and plasma.

The electrochemiluminescence immunoassay "ECLIA" is intended for use on Elecsys and **cobas e** immunoassay analyzers.

#### Summary

Vitamin B12, also referred to as cobalamin, is a complex organometallic compound in which a cobalt atom is situated within a corrin ring. It is a water-soluble vitamin which is synthesized by microorganisms. It cannot be synthesized in the human body and is seldom found in products of plant origin. Main sources of vitamin B12 are meat, fish, eggs and dairy products.

<sup>1</sup> The uptake in the gastrointestinal tract depends on intrinsic factor, which is synthesized by the gastric parietal cells, and on the "cobalamin receptor" in the distal ileum. The most frequent cause of severe vitamin B12 deficiency is a lack of intrinsic factor due to autoimmune atrophic gastritis. The disease is historically called "pernicious anemia", even though many patients present with mainly neurologic manifestations. Examples of other causes for vitamin B12 deficiency are malabsorption due to gastrectomy, inflammatory bowel disease or dietary deficiency, e.g. in strict vegetarians (vegans).<sup>2</sup>

Vitamin B12 is the cofactor for two enzymes, methionine synthase and methylmalonyl CoA mutase.<sup>2,3</sup> Methionine synthase, located in the cytoplasm, requires vitamin B12 in the form of methylcobalamin and catalyzes the conversion of homocysteine to methionine, an essential amino acid. During this step a methyl group is transferred from methyltetrahydrofolate to the amino acid.<sup>3</sup> This enzyme links the methylation pathway through synthesis of the methyl donor S-Adenosyl methionine and the pathway in which purine and pyrimidine are synthesized via generation of tetrahydrofolate.<sup>3</sup> In the form of 5'-deoxyadenosylcobalamin, vitamin B12 is also required for the mitochondrial enzyme methylmalonyl CoA mutase, which converts methylmalonyl CoA to succinyl CoA. This is a step in the oxidation of odd-chain fatty acids and catabolism of ketogenic amino acids.<sup>3</sup> Thus, vitamin B12 is important for DNA synthesis, regenerating methionine for protein synthesis and methylation, as well as for the development and initial myelination of the central nervous system (CNS) and for the maintenance of normal CNS function.<sup>2,3</sup>

Vitamin B12 deficiencies are common in wealthier countries principally among the elderly and are most prevalent in poorer populations. In general the prevalence increases with age.<sup>4,5</sup>

Vitamin B12 deficiency impacts red blood cell synthesis, resulting in megaloblastic anemia due to abnormal DNA synthesis.<sup>3</sup> In addition it impairs neurological function, in particular demyelination of nerves in part due to abnormal methylation, leading to peripheral neuropathy, dementia, poor cognitive performance, and depression.<sup>3</sup> Other effects of vitamin B12 deficiency or depletion are increased risk of neural tube defects, osteoporosis, cerebrovascular and cardiovascular diseases.<sup>3</sup> Early diagnosis is essential, because of the latent nature of this disorder and the risk of permanent neurological damage.<sup>3,5</sup>

Generally, the primary test performed to confirm the diagnosis of vitamin B12 deficiency is measurement of serum vitamin B12 level.<sup>2</sup> Recent publications suggest that in addition the following biomarkers should be measured to improve the specificity of diagnosis: folate, methylmalonic acid (MMA), homocysteine and holotranscobalamin.<sup>2,5,6,7</sup>

The Elecsys Vitamin B12 II assay employs a competitive test principle using intrinsic factor specific for vitamin B12. Vitamin B12 in the sample competes with the added vitamin B12 labeled with biotin for the binding sites on the ruthenium-labeled intrinsic factor complex<sup>a)</sup>.

a) Tris(2,2'-bipyridyl)ruthenium(II)-complex (Ru(bpy)<sub>3</sub><sup>2+</sup>)

### Test principle

Competition principle. Total duration of assay: 27 minutes.

- 1st incubation: By incubating the sample (15 µL) with the vitamin B12 pretreatment 1 and pretreatment 2, bound vitamin B12 is released.
- 2nd incubation: By incubating the pretreated sample with the ruthenium labeled intrinsic factor, a vitamin B12-binding protein complex is formed, the amount of which is dependent upon the analyte concentration in the sample.
- 3rd incubation: After addition of streptavidin-coated microparticles and vitamin B12 labeled with biotin, the still-vacant sites of the ruthenium labeled intrinsic factor become occupied, with formation of a ruthenium labeled intrinsic factor vitamin B12 biotin complex. The entire complex becomes bound to the solid phase via interaction of biotin and streptavidin.
- The reaction mixture is aspirated into the measuring cell where the microparticles are magnetically captured onto the surface of the electrode. Unbound substances are then removed with ProCell/ProCell M. Application of a voltage to the electrode then induces chemiluminescent emission which is measured by a photomultiplier.
- Results are determined via a calibration curve which is instrument-specifically generated by 2-point calibration and a master curve provided via the reagent barcode.

### Reagents - working solutions

The reagent rackpack (M, R1, R2) and the pretreatment reagents (PT1, PT2) are labeled as B12 II.

PT1 Pretreatment reagent 1 (white cap), 1 bottle, 4 mL:

Dithiothreitol 1.028 g/L; stabilizer, pH 5.5.

PT2 Pretreatment reagent 2 (gray cap), 1 bottle, 4 mL:

Sodium hydroxide 40 g/L; sodium cyanide 2.205 g/L.

M Streptavidin-coated microparticles (transparent cap), 1 bottle, 6.5 mL:

Streptavidin-coated microparticles 0.72 mg/mL; preservative.

R1 Intrinsic factor-Ru(bpy)<sub>3</sub><sup>2+</sup> (gray cap), 1 bottle, 10 mL:

Ruthenium labeled recombinant porcine intrinsic factor 4 µg/L; cobinamide dicyanide 15 µg/L; stabilizer; human serum albumin; phosphate buffer, pH 5.5; preservative.

R2 Vitamin B12-biotin (black cap), 1 bottle, 8.5 mL:

Biotinylated vitamin B12 25 µg/L; biotin 3 µg/L; phosphate buffer, pH 7.0; preservative.

### Precautions and warnings

For in vitro diagnostic use.

Exercise the normal precautions required for handling all laboratory reagents.

Disposal of all waste material should be in accordance with local guidelines. Safety data sheet available for professional user on request.

This kit contains components classified as follows in accordance with the Regulation (EC) No. 1272/2008:

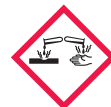

Danger

ms\_07212771190V1.0

# Vitamin B12 II



## Vitamin B12

- H290 May be corrosive to metals.
- H314 Causes severe skin burns and eye damage.
- H412 Harmful to aquatic life with long lasting effects.
- Prevention:**
- P234 Keep only in original container.
- P264 Wash skin thoroughly after handling.
- P273 Avoid release to the environment.
- P280 Wear protective gloves/ protective clothing/ eye protection/ face protection.

### Response:

- P301 + P330 IF SWALLOWED: Rinse mouth. Do NOT induce vomiting.  
+ P331
- P303 + P361 IF ON SKIN (or hair): Remove/Take off immediately all contaminated clothing. Rinse skin with water/shower.  
+ P353
- P304 + P340 IF INHALED: Remove person to fresh air and keep comfortable for breathing.
- P305 + P351 IF IN EYES: Rinse cautiously with water for several minutes. Remove contact lenses, if present and easy to do. Continue rinsing.  
+ P338
- P310 Immediately call a POISON CENTER or doctor/physician.
- P363 Wash contaminated clothing before reuse.
- P390 Absorb spillage to prevent material damage.

### Storage:

- P405 Store locked up.
- P406 Store in corrosive resistant stainless steel container with a resistant inner liner.

### Disposal:

- P501 Dispose of contents/container to an approved waste disposal plant.

Product safety labeling primarily follows EU GHS guidance.

Contact phone: all countries: +49-621-7590

All human material should be considered potentially infectious. All products derived from human blood are prepared exclusively from the blood of donors tested individually and shown to be free from HBsAg and antibodies to HCV and HIV. The testing methods applied were FDA-approved or cleared in compliance with the European Directive 98/79/EC, Annex II, List A.

However, as no testing method can rule out the potential risk of infection with absolute certainty, the material should be handled with the same level of care as a patient specimen. In the event of exposure, the directives of the responsible health authorities should be followed.<sup>8,9</sup>

Avoid foam formation in all reagents and sample types (specimens, calibrators and controls).

### Reagent handling

The reagents in the kit have been assembled into a ready-for-use unit that cannot be separated.

All information required for correct operation is read in from the respective reagent barcodes.

### Storage and stability

Store at 2-8 °C.

Do not freeze.

Store the Elecsys reagent kit **upright** in order to ensure complete availability of the microparticles during automatic mixing prior to use.

| Stability:              |                                                                                                                                                                                |
|-------------------------|--------------------------------------------------------------------------------------------------------------------------------------------------------------------------------|
| unopened at 2-8 °C      | up to the stated expiration date                                                                                                                                               |
| after opening at 2-8 °C | 84 days (12 weeks)                                                                                                                                                             |
| on the analyzers        | 35 days (5 weeks) onboard or 60 days when stored alternatively in the refrigerator and on the analyzer, with the total time onboard on the analyzer not exceeding 10 x 8 hours |

### Specimen collection and preparation

Only the specimens listed below were tested and found acceptable.

Serum collected using standard sampling tubes or tubes containing separating gel.

Na-heparin, Li-heparin, K<sub>2</sub>-EDTA and K<sub>3</sub>-EDTA plasma. Li-heparin plasma tubes containing separating gel can be used.

Criterion: Slope 0.9-1.1 + intercept within  $\pm 2x$  Limit of Blank (LoB) + coefficient of correlation  $\geq 0.95$ .

Stable for 2 hours at 15-25 °C, 48 hours at 2-8 °C, 56 days at (-15)-(-25) °C. Freeze once only.

Stability of serum obtained with separating tubes: 24 hours at 2-8 °C (note the data provided by the tube manufacturer).

The sample types listed were tested with a selection of sample collection tubes that were commercially available at the time of testing, i.e. not all available tubes of all manufacturers were tested. Sample collection systems from various manufacturers may contain differing materials which could affect the test results in some cases. When processing samples in primary tubes (sample collection systems), follow the instructions of the tube manufacturer.

Centrifuge samples containing precipitates before performing the assay.

Do not use heat-inactivated samples.

Avoid hemolysis.

Do not use samples and controls stabilized with azide.

Vitamin B12 determinations should be performed on serum or plasma samples from fasting patients.

**Note:** Samples with extremely high total protein concentrations (e.g. patients suffering from Waldenström's macroglobulinemia) are not suitable for use in this assay, since they may lead to the formation of protein gel in the assay cup. Processing protein gel may cause a run abort. The critical protein concentration is dependent upon the individual sample composition. The formation of protein gel was seen in samples (spiked with human IgG or human serum albumin) having a total protein concentration  $> 160$  g/L.

Ensure the samples, calibrators and controls are at 20-25 °C prior to measurement.

Due to possible evaporation effects, samples, calibrators and controls on the analyzers should be analyzed/measured within 2 hours.

### Materials provided

See "Reagents – working solutions" section for reagents.

### Materials required (but not provided)

- [REF] 07212780190, Vitamin B12 II CalSet, for 4 x 1 mL
  - [REF] 05618860190, PreciControl Varia, for 2 x 3 mL each of PreciControl Varia 1 and 2
  - [REF] 11732277122, Diluent Universal, 2 x 16 mL sample diluent or [REF] 03183971122, Diluent Universal, 2 x 36 mL sample diluent
  - General laboratory equipment
  - Elecsys 2010, MODULAR ANALYTICS E170 or **cobas e** analyzer
- Accessories for Elecsys 2010 and **cobas e** 411 analyzers:
- [REF] 11662988122, ProCell, 6 x 380 mL system buffer
  - [REF] 11662970122, CleanCell, 6 x 380 mL measuring cell cleaning solution



ms\_07212771190V1.0

# Vitamin B12 II



## Vitamin B12

- [REF] 11930346122, Elecsys SysWash, 1 x 500 mL washwater additive
- [REF] 11933159001, Adapter for SysClean
- [REF] 11706802001, Elecsys 2010 AssayCup, 60 x 60 reaction vessels
- [REF] 11706799001, Elecsys 2010 AssayTip, 30 x 120 pipette tips

Accessories for MODULAR ANALYTICS E170, **cobas e 601** and **cobas e 602** analyzers:

- [REF] 04880340190, ProCell M, 2 x 2 L system buffer
- [REF] 04880293190, CleanCell M, 2 x 2 L measuring cell cleaning solution
- [REF] 03023141001, PC/CC-Cups, 12 cups to prewarm ProCell M and CleanCell M before use
- [REF] 03005712190, ProbeWash M, 12 x 70 mL cleaning solution for run finalization and rinsing during reagent change
- [REF] 03004899190, PreClean M, 5 x 600 mL detection cleaning solution
- [REF] 12102137001, AssayTip/AssayCup Combimagazine M, 48 magazines x 84 reaction vessels or pipette tips, waste bags
- [REF] 03023150001, WasteLiner, waste bags
- [REF] 03027651001, SysClean Adapter M

Accessories for all analyzers:

- [REF] 11298500316, ISE Cleaning Solution/Elecsys SysClean, 5 x 100 mL system cleaning solution

### Assay

For optimum performance of the assay follow the directions given in this document for the analyzer concerned. Refer to the appropriate operator's manual for analyzer-specific assay instructions.

Resuspension of the microparticles takes place automatically prior to use. Read in the test-specific parameters via the reagent barcode. If in exceptional cases the barcode cannot be read, enter the 15-digit sequence of numbers.

MODULAR ANALYTICS E170, **cobas e 601** and **cobas e 602** analyzers: PreClean M solution is necessary.

Bring the cooled reagents to approximately 20 °C and place on the reagent disk (20 °C) of the analyzer. Avoid foam formation. The system automatically regulates the temperature of the reagents and the opening/closing of the bottles.

### Calibration

Traceability: This method has been standardized against the Vitamin B12 assay ([REF] 04745736).

Every Elecsys reagent set has a barcoded label containing specific information for calibration of the particular reagent lot. The predefined master curve is adapted to the analyzer using the relevant CalSet.

**Calibration frequency:** Calibration must be performed once per reagent lot using fresh reagent (i.e. not more than 24 hours since the reagent kit was registered on the analyzer). Renewed calibration is recommended as follows:

- after 1 month (28 days) when using the same reagent lot
- after 7 days (when using the same reagent kit on the analyzer)
- as required: e.g. quality control findings outside the defined limits

### Quality control

For quality control, use PreciControl Varia.

In addition, other suitable control material can be used.

Controls for the various concentration ranges should be run individually at least once every 24 hours when the test is in use, once per reagent kit, and following each calibration.

The control intervals and limits should be adapted to each laboratory's individual requirements. Values obtained should fall within the defined limits. Each laboratory should establish corrective measures to be taken if values fall outside the defined limits.

Follow the applicable government regulations and local guidelines for quality control.

### Calculation

The analyzer automatically calculates the analyte concentration of each sample (either in pmol/L or pg/mL).

Conversion factors: pmol/L x 1.36 = pg/mL  
pg/mL x 0.738 = pmol/L

### Limitations - interference

The assay is unaffected by icterus (bilirubin  $\leq$  1112  $\mu$ mol/L or  $\leq$  65 mg/dL), hemolysis (Hb  $\leq$  0.025 mmol/L or  $\leq$  0.04 g/dL), lipemia (triglycerides  $\leq$  17.1 mmol/L or  $\leq$  1500 mg/dL), biotin ( $\leq$  205 nmol/L or  $\leq$  50 ng/mL), IgG  $\leq$  28 g/L, IgA  $\leq$  16 g/L and IgM  $\leq$  10 g/L.

Criterion: Recovery within  $\pm$  10 % of initial value with samples  $>$  200 pg/mL and  $\leq$   $\pm$  20 pg/mL with samples  $\leq$  200 pg/mL.

Samples should not be taken from patients receiving therapy with high biotin doses (i.e.  $>$  5 mg/day) until at least 8 hours following the last biotin administration.

No interference was observed from rheumatoid factors up to a concentration of 1500 IU/mL.

In vitro tests were performed on 16 commonly used pharmaceuticals. No interference with the assay was found.

In rare cases, interference due to extremely high titers of antibodies to analyte-specific antibodies, streptavidin or ruthenium can occur. These effects are minimized by suitable test design.

Because intrinsic factor is typically used as the binding protein in serum vitamin B12 assays, anti-intrinsic factor antibodies (which are common in pernicious anemia) can lead to elevated vitamin B12 measurement values.<sup>2, 10, 11</sup> The Elecsys Vitamin B12 II assay is designed to avoid interference due to anti-intrinsic factor antibodies.<sup>12</sup>

For diagnostic purposes, the results should always be assessed in conjunction with the patient's medical history, clinical examination and other findings.

Note: The presence of immunoglobulin-vitamin B12 complexes may cause unexpectedly high values of vitamin B12.<sup>13, 14</sup>

### Limits and ranges

#### Measuring range

50.0-2000 pg/mL or 36.9-1476 pmol/L (defined by the Limit of Blank and the maximum of the master curve). Values below the Limit of Blank are reported as  $<$  50.0 pg/mL or  $<$  36.9 pmol/L. Values above the measuring range are reported as  $>$  2000 pg/mL or  $>$  1476 pmol/L.

#### Lower limits of measurement

*Limit of Blank (LoB), Limit of Detection (LoD) and Limit of Quantitation (LoQ)*

Limit of Blank = 50 pg/mL (36.9 pmol/L)

Limit of Detection = 100 pg/mL (73.8 pmol/L)

Limit of Quantitation = 150 pg/mL (111 pmol/L) with a allowable imprecision of  $\leq$  20 %

The Limit of Blank, Limit of Detection and Limit of Quantitation were determined in accordance with the CLSI (Clinical and Laboratory Standards Institute) EP17-A requirements.

The Limit of Blank is the 95<sup>th</sup> percentile value from  $n \geq$  60 measurements of analyte-free samples over several independent series. The Limit of Blank corresponds to the concentration below which analyte-free samples are found with a probability of 95 %.

The Limit of Detection is determined based on the Limit of Blank and the standard deviation of low concentration samples. The Limit of Detection corresponds to the lowest analyte concentration which can be detected (value above the Limit of Blank with a probability of 95 %).

The Limit of Quantitation is defined as the lowest amount of analyte in a sample that can be accurately quantitated with a allowable imprecision of  $\leq$  20 %.

It has been determined using low concentration vitamin B12 samples.

#### Dilution

Samples with vitamin B12 concentrations above the measuring range can be manually diluted 1:2 with Diluent Universal. The concentration of the diluted sample must be  $>$  738 pmol/L or  $>$  1000 pg/mL. After manual dilution, multiply the results by the dilution factor 2.

*Note:* Sample-dependent non-linearity upon dilution is seen with samples having analyte levels beyond the measuring range. As Diluent Universal may contain low levels of endogenous vitamin B12, it is recommended that linearity studies be performed using a known low analyte-containing serum

ms\_07212771190V1.0

# Vitamin B12 II

## Vitamin B12

pool. Samples outside the measuring range can be diluted 1:2 with Diluent Universal; the effect of endogenous vitamin B12 concentration is insignificant at these levels.

### Expected values

Because differences may exist with respect to population and dietary status, it is recommended that normal ranges be determined by each laboratory over a suitable period of time and in a statistically significant number of assays before clinical significance is attached to the results of these tests.

The values shown below were performed on samples from an apparently healthy population, using the Elecsys Vitamin B12 II assay. The calculation is based on 135 sera (68 men, 67 women). The age range was between 20 and 78 years. Pregnant women were excluded. The reference population was selected according to normal homocysteine values.

| N   | Median |        | Range (2.5 <sup>th</sup> -97.5 <sup>th</sup> percentile) |         |
|-----|--------|--------|----------------------------------------------------------|---------|
|     | pg/mL  | pmol/L | pg/mL                                                    | pmol/L  |
| 135 | 425    | 314    | 197-771                                                  | 145-569 |

These values should only be used as guidelines.

Each laboratory should investigate the transferability of the expected values to its own patient population and if necessary determine its own reference ranges.

### Specific performance data

Representative performance data on the analyzers are given below. Results obtained in individual laboratories may differ.

### Precision

Precision was determined using Elecsys reagents, pooled human sera and controls in a protocol (EP5-A2) of the CLSI (Clinical and Laboratory Standards Institute): 2 runs per day in duplication each for 21 days (n = 84). The following results were obtained:

| Elecsys 2010 and <b>cobas e 411</b> analyzers |       |               |     |                        |     |
|-----------------------------------------------|-------|---------------|-----|------------------------|-----|
| Sample                                        | Mean  | Repeatability |     | Intermediate precision |     |
|                                               |       | SD            | CV  | SD                     | CV  |
|                                               | pg/mL | pg/mL         | %   | pg/mL                  | %   |
| Human serum 1                                 | 176   | 8.86          | 5.0 | 12.7                   | 7.2 |
| Human serum 2                                 | 405   | 13.0          | 3.2 | 17.5                   | 4.3 |
| Human serum 3                                 | 960   | 19.7          | 2.1 | 31.0                   | 3.2 |
| Human serum 4                                 | 1230  | 27.4          | 2.2 | 46.4                   | 3.8 |
| Human serum 5                                 | 1940  | 40.9          | 2.1 | 72.6                   | 3.7 |
| PreciControl Varia1                           | 447   | 12.2          | 2.7 | 18.6                   | 4.2 |
| PreciControl Varia2                           | 934   | 20.2          | 2.2 | 38.4                   | 4.1 |

| Elecsys 2010 and <b>cobas e 411</b> analyzers |        |               |     |                        |     |
|-----------------------------------------------|--------|---------------|-----|------------------------|-----|
| Sample                                        | Mean   | Repeatability |     | Intermediate precision |     |
|                                               |        | SD            | CV  | SD                     | CV  |
|                                               | pmol/L | pmol/L        | %   | pmol/L                 | %   |
| Human serum 1                                 | 130    | 6.54          | 5.0 | 9.37                   | 7.2 |
| Human serum 2                                 | 299    | 9.59          | 3.2 | 12.9                   | 4.3 |
| Human serum 3                                 | 708    | 14.5          | 2.1 | 22.9                   | 3.2 |
| Human serum 4                                 | 908    | 20.2          | 2.2 | 34.2                   | 3.8 |
| Human serum 5                                 | 1432   | 30.2          | 2.1 | 53.6                   | 3.7 |
| PreciControl Varia1                           | 330    | 9.00          | 2.7 | 13.7                   | 4.2 |
| PreciControl Varia2                           | 689    | 14.9          | 2.2 | 28.3                   | 4.1 |

| MODULAR ANALYTICS E170, <b>cobas e 601</b> and <b>cobas e 602</b> analyzers |       |               |     |                        |     |
|-----------------------------------------------------------------------------|-------|---------------|-----|------------------------|-----|
| Sample                                                                      | Mean  | Repeatability |     | Intermediate precision |     |
|                                                                             |       | SD            | CV  | SD                     | CV  |
|                                                                             | pg/mL | pg/mL         | %   | pg/mL                  | %   |
| Human serum 1                                                               | 176   | 5.84          | 3.3 | 9.14                   | 5.2 |
| Human serum 2                                                               | 407   | 8.24          | 2.0 | 12.7                   | 3.1 |
| Human serum 3                                                               | 1010  | 13.2          | 1.3 | 21.1                   | 2.1 |
| Human serum 4                                                               | 1230  | 19.8          | 1.6 | 28.8                   | 2.3 |
| Human serum 5                                                               | 1890  | 29.8          | 1.6 | 41.5                   | 2.2 |
| PreciControl Varia1                                                         | 448   | 7.16          | 1.6 | 15.3                   | 3.4 |
| PreciControl Varia2                                                         | 917   | 12.0          | 1.3 | 27.8                   | 3.0 |

| MODULAR ANALYTICS E170, <b>cobas e 601</b> and <b>cobas e 602</b> analyzers |        |               |     |                        |     |
|-----------------------------------------------------------------------------|--------|---------------|-----|------------------------|-----|
| Sample                                                                      | Mean   | Repeatability |     | Intermediate precision |     |
|                                                                             |        | SD            | CV  | SD                     | CV  |
|                                                                             | pmol/L | pmol/L        | %   | pmol/L                 | %   |
| Human serum 1                                                               | 130    | 4.31          | 3.3 | 6.75                   | 5.2 |
| Human serum 2                                                               | 300    | 6.08          | 2.0 | 9.37                   | 3.1 |
| Human serum 3                                                               | 745    | 9.74          | 1.3 | 15.6                   | 2.1 |
| Human serum 4                                                               | 908    | 14.6          | 1.6 | 21.3                   | 2.3 |
| Human serum 5                                                               | 1395   | 22.0          | 1.6 | 30.6                   | 2.2 |
| PreciControl Varia1                                                         | 331    | 5.28          | 1.6 | 11.3                   | 3.4 |
| PreciControl Varia2                                                         | 677    | 8.86          | 1.3 | 20.5                   | 3.0 |

### Method comparison

a) A comparison of the Elecsys Vitamin B12 assay (calibrated with Vitamin B12 CalSet II; x) and the Elecsys Vitamin B12 II assay (calibrated with Vitamin B12 II CalSet; y) using clinical samples gave the following correlations (pg/mL):

Number of samples measured: 100

Passing/Bablok<sup>15</sup> Linear regression

$$y = 0.952x + 15.1 \quad y = 0.957x + 11.6$$

$$\tau = 0.977 \quad r = 0.999$$

The sample concentrations were between 69 and 1890 pg/mL (51 and 1395 pmol/L).

b) A comparison of the Elecsys Vitamin B12 II assay (y) and a commercially available method (x) using clinical samples gave the following correlations (pg/mL):

Number of samples measured: 106

Passing/Bablok<sup>15</sup> Linear regression

$$y = 0.923x + 4.90 \quad y = 0.881x + 27.6$$

$$\tau = 0.952 \quad r = 0.993$$

The sample concentrations were between 182 and 1797 pg/mL (134 and 1326 pmol/L).

c) A comparison of the Elecsys Vitamin B12 II assay on the **cobas e 601** analyzer (y) and the Elecsys Vitamin B12 II assay on the **cobas e 411** analyzer (x) using clinical samples gave the following correlations (pg/mL):

Number of samples measured: 117

Passing/Bablok<sup>15</sup> Linear regression

$$y = 1.01x - 2.77 \quad y = 1.01x + 3.22$$

$$\tau = 0.933 \quad r = 0.995$$

The sample concentrations were between 56 and 1887 pg/mL (41 and 1393 pmol/L).

ms\_07212771190V1.0

# Vitamin B12 II

## Vitamin B12



### Analytical specificity

The following cross-reactivities were found, tested with vitamin B12 concentrations of 129 pg/mL and 550 pg/mL.

| Cross-reactant       | Maximum concentration tested ng/mL | Cross-reactivity % |
|----------------------|------------------------------------|--------------------|
| Cobinamide dicyanide | 210                                | 0.003              |

### References

- 1 Thomas L. Clinical Laboratory Diagnostics: Use and Assessment of Clinical Laboratory Results; 1st Edition, Frankfurt/Main: TH-Books-Verl.-Ges., 1998:424-431.
- 2 Stabler SP. Vitamin B12 deficiency. N Engl J Med 2013;368:149-160.
- 3 Allen LH. Vitamin B-12. Adv Nutr 2012;3(1):54-55. doi: 10.3945/an.111.001370. Epub 2012 Jan 5.
- 4 Allen LH. How common is vitamin B-12 deficiency? Am J Clin Nutr 2009;89(2):693S-696S. Epub 2008 Dec 30.
- 5 Chatthanawaree W. Biomarkers of cobalamin (vitamin B12) deficiency and its application. J Nutr Health Aging 2011 Mar;15(3):227-313.
- 6 Yetley EA, Pfeiffer CM, Phinney KW, et al., Biomarkers of vitamin B-12 status in NHANES: a roundtable summary. Am J Clin Nutr 2011 Jul;94(1):313S-321S.
- 7 Hvas AM, Nexø E. Diagnosis and treatment of vitamin B12 deficiency - an update. Haematologica 2006;91(11):1506-1512.
- 8 Occupational Safety and Health Standards: bloodborne pathogens. (29 CFR Part 1910.1030). Fed. Register.
- 9 Directive 2000/54/EC of the European Parliament and Council of 18 September 2000 on the protection of workers from risks related to exposure to biological agents at work.
- 10 Yang DT, Cook RJ. Spurious elevations of vitamin B12 with pernicious anemia. N Engl J Med 2012;366:1742-1743.
- 11 Carmel R, Agrawal YP. Failures of cobalamin assays in pernicious anemia. N Engl J Med 2012;367:385-386. [Erratum, N Engl J Med 2012;367:976.]
- 12 Schilling KA, Wiesgigl M. The Elecsys® Vitamin B12 assay is not affected by anti-intrinsic factor antibodies. Clin Chem Lab Med 2013 Jun 29;51(11):e251-e252.
- 13 Jeffery J, Millar H, MacKenzie P, et al. An IgG complexed form of vitamin B12 is a common cause of elevated serum concentrations. Clin Biochem 2010 Jan;43(1-2):82-88. doi: 10.1016/j.clinbiochem.2009.08.022. Epub 2009 Sep 8.
- 14 Bowen RA, Drake SK, Vanjani R, et al. Markedly increased vitamin B12 concentrations attributable to IgG-IgM-vitamin B12 immune complexes. Clin Chem 2006;52(11):2107-2114.
- 15 Bablok W, Passing H, Bender R, et al. A general regression procedure for method transformation. Application of linear regression procedures for method comparison studies in clinical chemistry, Part III. J Clin Chem Clin Biochem 1988 Nov;26(11):783-790.

For further information, please refer to the appropriate operator's manual for the analyzer concerned, the respective application sheets, the product information and the Method Sheets of all necessary components (if available in your country).

A point (period/stop) is always used in this Method Sheet as the decimal separator to mark the border between the integral and the fractional parts of a decimal numeral. Separators for thousands are not used.

### Symbols

Roche Diagnostics uses the following symbols and signs in addition to those listed in the ISO 15223-1 standard.

- Contents of kit
- Analyzers/Instruments on which reagents can be used
- Reagent
- Calibrator

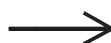

Volume after reconstitution or mixing

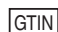

Global Trade Item Number

COBAS, COBAS E, ELECSYS and PRECICONTROL are trademarks of Roche. INTRALIPID is a trademark of Fresenius Kabi AB.

All other product names and trademarks are the property of their respective owners.

Additions, deletions or changes are indicated by a change bar in the margin.

© 2015, Roche Diagnostics

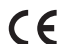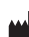

Roche Diagnostics GmbH, Sandhofer Strasse 116, D-68305 Mannheim  
www.roche.com

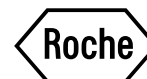

0107227841190c501V1.0

# STFR2

**cobas**<sup>®</sup>

## Tina-quant Soluble Transferrin Receptor II

### Order information

| REF         | CONTENT                                               | Analyzer(s) on which <b>cobas c</b> pack(s) can be used |
|-------------|-------------------------------------------------------|---------------------------------------------------------|
| 07227841190 | Tina-quant Soluble Transferrin Receptor II(100 tests) | System-ID 07 7473 1 <b>cobas c 311, cobas c 501/502</b> |
| 08753776190 | Calibrator sTfR II (3 x 1 mL)                         | Codes 697                                               |
| 08278202190 | ControlSet sTfR II                                    |                                                         |
|             | Level I (3 x 1 mL)                                    | Level I Code 153                                        |
|             | Level II (3 x 1 mL)                                   | Level II Code 154                                       |
| 04489357190 | Diluent NaCl 9 % (50 mL)                              | System-ID 07 6869 3                                     |

### English

#### System information

For **cobas c** 311/501 analyzers:**STFR2**: ACN 439For **cobas c** 502 analyzer:**STFR2**: ACN 8439

#### Intended use

In vitro test for the quantitative determination of soluble transferrin receptor (sTfR) in human serum and plasma on **cobas c** systems.

#### Summary<sup>1,2,3,4,5,6,7</sup>

The transferrin receptor is an integral membrane glycoprotein having a molecular weight of 190 kilodalton (kDa). It consists of two identical subunits linked by disulfide bridges. Each of the monomers has an 85 kDa C-terminal component which can bind an iron-laden transferrin molecule. Proteolysis leads to the soluble form of the transferrin receptor (sTfR). In plasma, the soluble transferrin receptor is present in the form of a complex with transferrin having a molecular weight of approximately 320 kD. The serum concentration of sTfR is directly proportional to the concentration of the receptor on the membrane.

The uptake of iron by the body's cells is controlled by expression of the transferrin receptor (TfR). If the intracellular iron stores are exhausted - corresponding to a ferritin concentration of less than 12 µg/L - then more TfR is expressed. The affinity of the transferrin receptor to transferrin depends on the latter's loading state. As 80-95 % of the transferrin receptor molecules are localized on erythropoietic cells, the TfR concentration (and hence also the sTfR concentration) reflects the iron requirement of these cells. When iron deficiency exists, the sTfR concentration in serum rises even before the hemoglobin concentration is significantly depressed. The sTfR concentration can therefore describe the functional iron status while ferritin reflects the iron storage status. A precise assessment of the iron status can be obtained by determining the sTfR index (= sTfR concentration/log ferritin concentration).

As - in contrast to ferritin - the concentration of sTfR is not affected by acute-phase reactions, acute liver function disorders or malignant tumors, it is possible to differentiate between anemia of chronic disease (ACD) and iron deficiency anemia (IDA). Elevated sTfR values are also found in polycythemia, hemolytic anemia, thalassemia, hereditary spherocytosis, sickle cell anemia, megaloblastic anemia, myelodysplastic syndrome and vitamin B<sub>12</sub> deficiency. Elevated sTfR concentrations occur during pregnancy when there is a deficiency of functional iron.

| Parameter  | Change                     | IDA | ACD | IDA + ACD |
|------------|----------------------------|-----|-----|-----------|
| Ferritin   | iron stores                | ↓   | ↑   | — or ↑    |
| TIBC/TRSF  | iron status                | ↑   | ↓   | ↑ or —    |
| Serum iron | iron status                | ↓   | ↓   | ↓         |
| sTfR       | functional iron deficiency | ↑   | —   | ↑         |

↓ decreased, ↑ increased, — unchanged

#### Test principle<sup>8</sup>

Particle enhanced immunoturbidimetric assay.

Human soluble transferrin receptor agglutinates with latex particles coated with anti-soluble transferrin receptor antibodies. The precipitate is determined photometrically.

#### Reagents - working solutions

**R1** TRIS buffer: with bovine serum albumin; preservatives**R2** Latex particles coated with monoclonal anti-human sTfR antibodies (mouse) in glycine buffer; preservative

R1 is in position B and R2 is in position C.

#### Precautions and warnings

For in vitro diagnostic use.

Exercise the normal precautions required for handling all laboratory reagents.

Disposal of all waste material should be in accordance with local guidelines. Safety data sheet available for professional user on request.

This kit contains components classified as follows in accordance with the Regulation (EC) No. 1272/2008:

Contains 2-methyl-2H-isothiazol-3-one hydrochloride

EUH 208 May produce an allergic reaction.

Product safety labeling follows EU GHS guidance.

#### Reagent handling

Ready for use

Carefully invert reagent container several times prior to use to ensure that the reagent components are mixed.

#### Storage and stability

##### STFR2

Shelf life at 2-8 °C:

See expiration date on **cobas c** pack label.

On-board in use and refrigerated on the analyzer:

26 weeks

##### Diluent NaCl 9 %

Shelf life at 2-8 °C:

See expiration date on **cobas c** pack label.

On-board in use and refrigerated on the analyzer:

12 weeks

#### Specimen collection and preparation

For specimen collection and preparation only use suitable tubes or collection containers.

Only the specimens listed below were tested and found acceptable. Serum.

Plasma: Heparin (Li-, Na-, NH<sub>4</sub><sup>+</sup>-) plasma

The sample types listed were tested with a selection of sample collection tubes that were commercially available at the time of testing, i.e. not all available tubes of all manufacturers were tested. Sample collection systems from various manufacturers may contain differing materials which could affect the test results in some cases. When processing samples in primary tubes (sample collection systems), follow the instructions of the tube manufacturer.

Centrifuge samples containing precipitates before performing the assay.

See the limitations and interferences section for details about possible sample interferences.

Stability:

6 days at 15-25 °C

15 days at 2-8 °C

13 weeks at -20 °C (±5 °C) (freeze only once)

0107227841190c501V1.0

# STFR2

## Tina-quant Soluble Transferrin Receptor II

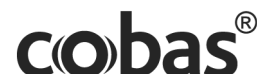

Sample stability claims were established by experimental data by the manufacturer or based on reference literature and only for the temperatures/time frames as stated in the method sheet. It is the responsibility of the individual laboratory to use all available references and/or its own studies to determine specific stability criteria for its laboratory.

### Materials provided

See "Reagents – working solutions" section for reagents.

### Materials required (but not provided)

- See "Order information" section
- General laboratory equipment

### Assay

For optimum performance of the assay follow the directions given in this document for the analyzer concerned. Refer to the appropriate operator's manual for analyzer-specific assay instructions.

The performance of applications not validated by Roche is not warranted and must be defined by the user.

### Application for serum and plasma

#### cobas c 311 test definition

|                            |                            |                        |                       |
|----------------------------|----------------------------|------------------------|-----------------------|
| Assay type                 | 2-Point End                |                        |                       |
| Reaction time/Assay points | 10 / 8-21                  |                        |                       |
| Wavelength (sub/main)      | 800/570 nm                 |                        |                       |
| Reaction direction         | Increase                   |                        |                       |
| Unit                       | mg/L (mg/dL, nmol/L)       |                        |                       |
| Reagent pipetting          | Diluent (H <sub>2</sub> O) |                        |                       |
| R1                         | 100 µL                     | -                      |                       |
| R2                         | 40 µL                      | -                      |                       |
| <i>Sample volumes</i>      | <i>Sample</i>              | <i>Sample dilution</i> |                       |
|                            |                            | <i>Sample</i>          | <i>Diluent (NaCl)</i> |
| Normal                     | 2 µL                       | -                      | -                     |
| Decreased                  | 2 µL                       | 25 µL                  | 75 µL                 |
| Increased                  | 2 µL                       |                        |                       |

#### cobas c 501 test definition

|                            |                            |                        |                       |
|----------------------------|----------------------------|------------------------|-----------------------|
| Assay type                 | 2-Point End                |                        |                       |
| Reaction time/Assay points | 10 / 13-30                 |                        |                       |
| Wavelength (sub/main)      | 800/570 nm                 |                        |                       |
| Reaction direction         | Increase                   |                        |                       |
| Unit                       | mg/L (mg/dL, nmol/L)       |                        |                       |
| Reagent pipetting          | Diluent (H <sub>2</sub> O) |                        |                       |
| R1                         | 100 µL                     | -                      |                       |
| R2                         | 40 µL                      | -                      |                       |
| <i>Sample volumes</i>      | <i>Sample</i>              | <i>Sample dilution</i> |                       |
|                            |                            | <i>Sample</i>          | <i>Diluent (NaCl)</i> |
| Normal                     | 2 µL                       | -                      | -                     |
| Decreased                  | 2 µL                       | 25 µL                  | 75 µL                 |
| Increased                  | 2 µL                       |                        |                       |

#### cobas c 502 test definition

|                            |                      |  |  |
|----------------------------|----------------------|--|--|
| Assay type                 | 2-Point End          |  |  |
| Reaction time/Assay points | 10 / 13-30           |  |  |
| Wavelength (sub/main)      | 800/570 nm           |  |  |
| Reaction direction         | Increase             |  |  |
| Unit                       | mg/L (mg/dL, nmol/L) |  |  |

|                       |                            |                        |                       |
|-----------------------|----------------------------|------------------------|-----------------------|
| Reagent pipetting     | Diluent (H <sub>2</sub> O) |                        |                       |
| R1                    | 100 µL                     | -                      |                       |
| R2                    | 40 µL                      | -                      |                       |
| <i>Sample volumes</i> | <i>Sample</i>              | <i>Sample dilution</i> |                       |
|                       |                            | <i>Sample</i>          | <i>Diluent (NaCl)</i> |
| Normal                | 2 µL                       | -                      | -                     |
| Decreased             | 2 µL                       | 25 µL                  | 75 µL                 |
| Increased             | 2 µL                       |                        |                       |

### Calibration

|                       |                                                                                                                                                                                                                                                             |
|-----------------------|-------------------------------------------------------------------------------------------------------------------------------------------------------------------------------------------------------------------------------------------------------------|
| Calibrators           | S1: H <sub>2</sub> O<br>S2-S6: Calibrator sTfR II                                                                                                                                                                                                           |
| Calibration mode      | Non-linear                                                                                                                                                                                                                                                  |
| Calibration frequency | Full calibration <ul style="list-style-type: none"> <li>after reagent lot change</li> <li>after 12 weeks on-board the analyzer</li> <li>after 6 months when using a single reagent lot</li> <li>as required following quality control procedures</li> </ul> |

Calibration interval may be extended based on acceptable verification of calibration by the laboratory.

Traceability: This method has been standardized against an in-house reference preparation.

### Quality control

For quality control, use control materials as listed in the "Order information" section.

In addition, other suitable control material can be used.

The control intervals and limits should be adapted to each laboratory's individual requirements. Values obtained should fall within the defined limits. Each laboratory should establish corrective measures to be taken if values fall outside the defined limits.

Follow the applicable government regulations and local guidelines for quality control.

### Calculation

**cobas c** systems automatically calculate the analyte concentration of each sample in the unit mg/L (mg/dL, nmol/L)

|                     |                                      |
|---------------------|--------------------------------------|
| Conversion factors: | mg/L x 11.8 = nmol/L <sup>9,a)</sup> |
|                     | mg/L x 0.1 = mg/dL                   |

a) Based on a molecular mass of 85 kDa for circulating transferrin receptor.

### Limitations – interference

Criterion: Recovery within ± 0.2 mg/L (2.36 nmol/L) of initial values of samples ≤ 2 mg/L (23.6 nmol/L) and within ± 10 % for samples > 2 mg/L.  
Icterus:<sup>10</sup> No significant interference up to an I index of 60 for conjugated and unconjugated bilirubin (approximate conjugated and unconjugated bilirubin concentration: 1026 µmol/L or 60 mg/dL).

Hemolysis:<sup>10</sup> No significant interference up to an H index of 1000 (approximate hemoglobin concentration: 622 µmol/L or 1000 mg/dL).

Lipemia (Intralipid):<sup>10</sup> No significant interference up to an L index of 2000. There is poor correlation between the L index (corresponds to turbidity) and triglycerides concentration.

Rheumatoid factors: No significant interference from rheumatoid factors up to a concentration of 1200 IU/mL.

High dose hook-effect: No false result occurs up to an sTfR concentration of 80 mg/L (944 nmol/L).

The antibodies are specific for sTfR. There is no cross-reactivity with diferrotransferrin, apotransferrin or ferritin under the assay conditions.

Drugs: No interference was found at therapeutic concentrations using common drug panels.<sup>11,12</sup>

0107227841190c501V1.0

# STFR2

## Tina-quant Soluble Transferrin Receptor II

**cobas**<sup>®</sup>

In very rare cases, gammopathy, in particular type IgM (Waldenström's macroglobulinemia), may cause unreliable results.<sup>13</sup>

In very rare cases, patient samples may contain particle agglutinating proteins (e.g. heterophilic antibodies or antibodies due to abnormal immunoglobulin synthesis, such as gammopathies like MGUS\* or Waldenström's macroglobulinemia) which may lead to incorrect low or high results with this assay. Correct results cannot be obtained by sample dilution and these samples should be analyzed by an alternative method.

\*Monoclonal Gammopathy of unknown significance

For diagnostic purposes, the results should always be assessed in conjunction with the patient's medical history, clinical examination and other findings.

### ACTION REQUIRED

**Special Wash Programming:** The use of special wash steps is mandatory when certain test combinations are run together on **cobas c** systems. The latest version of the carry-over evasion list can be found with the NaOH-SMS-SmpCln1+2-SCCS Method Sheets. For further instructions refer to the operator's manual. **cobas c** 502 analyzer: All special wash programming necessary for avoiding carry-over is available via the **cobas** link, manual input is required in certain cases.

**Where required, special wash/carry-over evasion programming must be implemented prior to reporting results with this test.**

### Limits and ranges

#### Measuring range

0.50-20.0 mg/L (5.9-236 nmol/L)

Determine samples having higher concentrations via the rerun function. Dilution of samples via the rerun function is a 1:4 dilution. Results from samples diluted using the rerun function are automatically multiplied by a factor of 4.

#### Lower limits of measurement

*Limit of Blank, Limit of Detection and Limit of Quantitation*

Limit of Blank = 0.25 mg/L (2.95 nmol/L)

Limit of Detection = 0.40 mg/L (4.72 nmol/L)

Limit of Quantitation = 0.50 mg/L (5.90 nmol/L)

The Limit of Blank and Limit of Detection were determined in accordance with the CLSI (Clinical and Laboratory Standards Institute) EP17-A2 requirements.

The Limit of Blank is the 95<sup>th</sup> percentile value from  $n \geq 60$  measurements of analyte-free samples over several independent series. The Limit of Blank corresponds to the concentration below which analyte-free samples are found with a probability of 95 %.

The Limit of Detection is determined based on the Limit of Blank and the standard deviation of low concentration samples.

The Limit of Detection corresponds to the lowest analyte concentration which can be detected (value above the Limit of Blank with a probability of 95 %).

The Limit of Quantitation is the lowest analyte concentration that can be reproducibly measured with a total error of 20 %. It has been determined using low concentration sTfR samples.

#### Expected values

The values shown below were performed on samples from an apparently healthy population, using the Tina-quant Soluble Transferrin Receptor II assay (STFR2). The calculation is based on 165 sera (101 men, 64 women). The age range was between 22 and 83 years. The analysis of the data with the 2.5 % and the 97.5 % percentile gave a soluble transferrin receptor (sTfR) range from 1.71 mg/L (20.2 nmol/L) to 4.13 mg/L (48.7 nmol/L).

Each laboratory should investigate the transferability of the expected values to its own patient population and if necessary determine its own reference ranges.

#### Specific performance data

Representative performance data on the analyzers are given below. Results obtained in individual laboratories may differ.

#### Precision

Precision was determined using human samples and controls in accordance with the CLSI (Clinical and Laboratory Standards Institute)

EP5-A3 requirements with repeatability ( $n = 84$ ) and intermediate precision (2 aliquots per run, 2 runs per day, 21 days)

The following results were obtained:

| Repeatability           | Mean | SD     | CV  |
|-------------------------|------|--------|-----|
|                         | mg/L | mg/L   | %   |
| Control Set sTfR II L 1 | 2.56 | 0.0389 | 1.5 |
| Control Set sTfR II L 2 | 6.91 | 0.0626 | 0.9 |
| Human serum 1           | 1.21 | 0.0375 | 3.1 |
| Human serum 2           | 2.00 | 0.0438 | 2.2 |
| Human serum 3           | 5.27 | 0.0526 | 1.0 |
| Human serum 4           | 9.23 | 0.108  | 1.2 |
| Human serum 5           | 17.7 | 0.157  | 0.9 |
| Intermediate precision  | Mean | SD     | CV  |
|                         | mg/L | mg/L   | %   |
| Control Set sTfR II L 1 | 2.56 | 0.0444 | 1.7 |
| Control Set sTfR II L 2 | 6.91 | 0.0732 | 1.1 |
| Human serum 1           | 1.21 | 0.0388 | 3.2 |
| Human serum 2           | 2.00 | 0.0475 | 2.4 |
| Human serum 3           | 5.27 | 0.0675 | 1.3 |
| Human serum 4           | 9.31 | 0.118  | 1.3 |
| Human serum 5           | 17.7 | 0.192  | 1.1 |

#### Method comparison

sTfR values for human serum and plasma samples obtained on a **cobas c** 501 analyzer (y) were compared with those determined using the Soluble Transferrin Receptor assay (STFR) on a **cobas c** 501 analyzer(x).

Sample size ( $n$ ) = 87

Passing/Bablok<sup>14</sup>

$y = 0.987x + 0.0347$  mg/L

$\tau = 0.939$

Linear regression

$y = 0.989x + 0.0264$  mg/L

$r = 0.996$

The sample concentrations were between 0.660 and 19.1 mg/L.

#### References

- Wick M, Pinggera W, Lehmann P, eds. Iron Metabolism, Diagnosis and Therapy of Anemias. 4th ed. Vienna/New York: Springer Verlag 1999.
- Ferguson BJ, Skikne BS, Simpson KM, et al. Serum transferrin receptor distinguishes the anemia of chronic diseases from iron deficiency anemia. *J Lab Clin Med* 1992;19:385-390.
- Baynes RD, Skikne BS, Cook JD. Circulating transferrin receptors and assessment of iron status. *J Nutr Biochem* 1994;5:322-330.
- Kuiper-Kramer EPA, Huisman CMS, van Raan J, et al. Analytical and clinical implications of soluble transferrin receptors. *Eur J Clin Chem Clin Biochem* 1996;34:645-649.
- Baynes RD. Assessment of iron status. *Clin Biochem* 1996;29:209-215.
- Punnonen K, Irjala K, Rajamäki A. Serum transferrin receptor and its ratio to serum ferritin in the diagnosis of iron deficiency. *Blood* 1997;89:1052-1057.
- Suominen P, Punnonen K, Rajamäki A, et al. Serum transferrin receptor and transferrin receptor-ferritin index identify healthy subjects with subclinical iron deficits. *Blood* 1998;92:2934-2939.
- Haeckel R, ed. Evaluation methods in laboratory medicine. VCH Verlagsgesellschaft, Weinheim 1993.
- Cook JD, Skikne BS, Baynes RD. Serum transferrin receptor. *Annu Rev Med* 1993;44:63-74.
- Glick MR, Ryder KW, Jackson SA. Graphical Comparisons of Interferences in Clinical Chemistry Instrumentation. *Clin Chem* 1986;32:470-475.

0107227841190c501V1.0

# STFR2

## Tina-quant Soluble Transferrin Receptor II

**cobas**<sup>®</sup>

- 11 Breuer J. Report on the Symposium "Drug effects in Clinical Chemistry Methods". Eur J Clin Chem Clin Biochem 1996;34:385-386.
- 12 Sonntag O, Scholer A. Drug interference in clinical chemistry: recommendation of drugs and their concentrations to be used in drug interference studies. Ann Clin Biochem 2001;38:376-385.
- 13 Bakker AJ, Mücke M. Gammopathy interference in clinical chemistry assays: mechanisms, detection and prevention. Clin Chem Lab Med 2007;45(9):1240-1243.
- 14 Bablok W, Passing H, Bender R, et al. A general regression procedure for method transformation. Application of linear regression procedures for method comparison studies in clinical chemistry, Part III. J Clin Chem Clin Biochem 1988 Nov;26(11):783-790.

A point (period/stop) is always used in this Method Sheet as the decimal separator to mark the border between the integral and the fractional parts of a decimal numeral. Separators for thousands are not used.

### Symbols

Roche Diagnostics uses the following symbols and signs in addition to those listed in the ISO 15223-1 standard (for USA: see dialog.roche.com for definition of symbols used):

|                                                                                   |                           |
|-----------------------------------------------------------------------------------|---------------------------|
|  | Contents of kit           |
|  | Volume for reconstitution |
|  | Global Trade Item Number  |

COBAS, COBAS C and TINA-QUANT are trademarks of Roche.

All other product names and trademarks are the property of their respective owners.

Additions, deletions or changes are indicated by a change bar in the margin.

© 2020, Roche Diagnostics

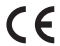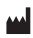

Roche Diagnostics GmbH, Sandhofer Strasse 116, D-68305 Mannheim  
www.roche.com

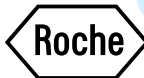

ms\_03737551190V14.0

# Ferritin



## Ferritin

|              |          |                                                                                                          |
|--------------|----------|----------------------------------------------------------------------------------------------------------|
| REF          | $\Sigma$ | SYSTEM                                                                                                   |
| 03737551 190 | 100      | Elecsys 2010<br>MODULAR ANALYTICS E170<br><b>cobas e 411</b><br><b>cobas e 601</b><br><b>cobas e 602</b> |

### English

#### Intended use

Immunoassay for the in vitro quantitative determination of ferritin in human serum and plasma.

The electrochemiluminescence immunoassay "ECLIA" is intended for use on Elecsys and **cobas e** immunoassay analyzers.

#### Summary

Ferritin is a macromolecule with a molecular weight of at least 440 kDa (depending on the iron content) and consists of a protein shell (apoferritin) of 24 subunits and an iron core containing an average of approx. 2500 Fe<sup>3+</sup> ions (in liver and spleen ferritin).<sup>1</sup>

Ferritin tends to form oligomers, and when it is present in excess in the cells of the storage organs there is a tendency for condensation to semicrystalline hemosiderin to occur in the lysosomes.

At least 20 isoferritins can be distinguished with the aid of isoelectric focusing.<sup>2</sup> This microheterogeneity is due to differences in the contents of the acidic H and weakly basic L subunits. The basic isoferritins are responsible for the long-term iron storage function, and are found mainly in the liver, spleen, and bone marrow.<sup>1,3</sup>

Acidic isoferritins are found mainly in the myocardium, placenta, and tumor tissue. They have a lower iron content and presumably function as intermediaries for the transfer of iron in various syntheses.<sup>4,5,6</sup>

The determination of ferritin is a suitable method for ascertaining the iron metabolism situation. Determination of ferritin at the beginning of therapy provides a representative measure of the body's iron reserves. A storage deficiency in the reticulo-endothelial system (RES) can be detected at a very early stage.<sup>7</sup>

Clinically, a threshold value of 20 µg/L (ng/mL) has proved useful in the detection of prelatent iron deficiency. This value provides a reliable indication of exhaustion of the iron reserves that can be mobilized for hemoglobin synthesis. Latent iron deficiency is defined as a fall below the 12 µg/L (ng/mL) ferritin threshold. These two values necessitate no further laboratory elucidation, even when the blood picture is still morphologically normal. If the depressed ferritin level is accompanied by hypochromic, microcytal anemia, then manifest iron deficiency is present.<sup>1</sup>

When the ferritin level is elevated and the possibility of a distribution disorder can be ruled out, this is a manifestation of iron overloading in the body. 400 µg/L (ng/mL) ferritin is used as the threshold value. Elevated ferritin values are also encountered with the following tumors: acute leukemia, Hodgkin's disease and carcinoma of the lung, colon, liver and prostate. The determination of ferritin has proved to be of value in liver metastasis. Studies indicate that 76 % of all patients with liver metastasis have ferritin values above 400 µg/L (ng/mL). Reasons for the elevated values could be cell necrosis, blocked erythropoiesis or increased synthesis in tumor tissue.

Two monoclonal mouse antibodies - M-4.184 and M-3.170 - are used to form the sandwich complex in the assay.

#### Test principle

Sandwich principle. Total duration of assay: 18 minutes.

- 1st incubation: 10 µL of sample, a biotinylated monoclonal ferritin-specific antibody, and a monoclonal ferritin-specific antibody labeled with a ruthenium complex<sup>a)</sup> form a sandwich complex.
- 2nd incubation: After addition of streptavidin-coated microparticles, the complex becomes bound to the solid phase via interaction of biotin and streptavidin.

- The reaction mixture is aspirated into the measuring cell where the microparticles are magnetically captured onto the surface of the electrode. Unbound substances are then removed with ProCell/ProCell M. Application of a voltage to the electrode then induces chemiluminescent emission which is measured by a photomultiplier.
- Results are determined via a calibration curve which is instrument-specifically generated by 2-point calibration and a master curve provided via the reagent barcode.

a) Tris(2,2'-bipyridyl)ruthenium(II)-complex (Ru(bpy)<sub>3</sub><sup>2+</sup>)

#### Reagents - working solutions

The reagent rackpack is labeled as FERR.

- M Streptavidin-coated microparticles (transparent cap), 1 bottle, 6.5 mL:  
Streptavidin-coated microparticles 0.72 mg/mL; preservative.
- R1 Anti-Ferritin-Ab~biotin (gray cap), 1 bottle, 10 mL:  
Biotinylated monoclonal anti-ferritin antibody (mouse) 3.0 mg/L;  
phosphate buffer 100 mmol/L, pH 7.2; preservative.
- R2 Anti-ferritin-Ab~Ru(bpy)<sub>3</sub><sup>2+</sup> (black cap), 1 bottle, 10 mL:  
Monoclonal anti-ferritin antibody (mouse) labeled with ruthenium complex 6.0 mg/L; phosphate buffer 100 mmol/L, pH 7.2;  
preservative.

#### Precautions and warnings

For in vitro diagnostic use.

Exercise the normal precautions required for handling all laboratory reagents.

Disposal of all waste material should be in accordance with local guidelines. Safety data sheet available for professional user on request.

Avoid foam formation in all reagents and sample types (specimens, calibrators and controls).

#### Reagent handling

The reagents in the kit have been assembled into a ready-for-use unit that cannot be separated.

All information required for correct operation is read in from the respective reagent barcodes.

#### Storage and stability

Store at 2-8 °C.

Do not freeze.

Store the Elecsys reagent kit **upright** in order to ensure complete availability of the microparticles during automatic mixing prior to use.

|                         |                                  |
|-------------------------|----------------------------------|
| Stability:              |                                  |
| unopened at 2-8 °C      | up to the stated expiration date |
| after opening at 2-8 °C | 12 weeks                         |
| on the analyzers        | 6 weeks                          |

#### Specimen collection and preparation

Only the specimens listed below were tested and found acceptable.

Serum collected using standard sampling tubes.

Li<sup>-</sup>, Na-heparin, K<sub>3</sub>-EDTA and sodium citrate plasma.

When sodium citrate is used, the results must be corrected by + 10 %.

Criterion: Recovery within 90-110 % of serum value or slope 0.9-1.1 + intercept within < ± 2x analytical sensitivity (LDL) + coefficient of correlation > 0.95.

Stable for 7 days at 2-8 °C, 12 months at -20 °C.<sup>8</sup>



ms\_03737551190V14.0

# Ferritin

## Ferritin



The sample types listed were tested with a selection of sample collection tubes that were commercially available at the time of testing, i.e. not all available tubes of all manufacturers were tested. Sample collection systems from various manufacturers may contain differing materials which could affect the test results in some cases. When processing samples in primary tubes (sample collection systems), follow the instructions of the tube manufacturer.

Centrifuge samples containing precipitates before performing the assay.

Do not use heat-inactivated samples.

Do not use samples and controls stabilized with azide.

Ensure the samples, calibrators and controls are at 20-25 °C prior to measurement.

Due to possible evaporation effects, samples, calibrators and controls on the analyzers should be analyzed/measured within 2 hours.

### Materials provided

See "Reagents – working solutions" section for reagents.

### Materials required (but not provided)

- [REF] 03737586190, Ferritin CalSet, 4 x 1 mL
- [REF] 11776452122, PreciControl Tumor Marker, for 2 x 3 mL each of PreciControl Tumor Marker 1 and 2 or [REF] 05618860190, PreciControl Varia, for 2 x 3 mL each of PreciControl Varia 1 and 2
- [REF] 11732277122, Diluent Universal, 2 x 16 mL sample diluent or [REF] 03183971122, Diluent Universal, 2 x 36 mL sample diluent
- General laboratory equipment
- Elecsys 2010, MODULAR ANALYTICS E170 or **cobas e** analyzer

Accessories for Elecsys 2010 and **cobas e** 411 analyzers:

- [REF] 11662988122, ProCell, 6 x 380 mL system buffer
- [REF] 11662970122, CleanCell, 6 x 380 mL measuring cell cleaning solution
- [REF] 11930346122, Elecsys SysWash, 1 x 500 mL washwater additive
- [REF] 11933159001, Adapter for SysClean
- [REF] 11706802001, Elecsys 2010 AssayCup, 60 x 60 reaction vessels
- [REF] 11706799001, Elecsys 2010 AssayTip, 30 x 120 pipette tips

Accessories for MODULAR ANALYTICS E170, **cobas e** 601 and **cobas e** 602 analyzers:

- [REF] 04880340190, ProCell M, 2 x 2 L system buffer
- [REF] 04880293190, CleanCell M, 2 x 2 L measuring cell cleaning solution
- [REF] 03023141001, PC/CC-Cups, 12 cups to prewarm ProCell M and CleanCell M before use
- [REF] 03005712190, ProbeWash M, 12 x 70 mL cleaning solution for run finalization and rinsing during reagent change
- [REF] 12102137001, AssayTip/AssayCup Combimagazine M, 48 magazines x 84 reaction vessels or pipette tips, waste bags
- [REF] 03023150001, WasteLiner, waste bags
- [REF] 03027651001, SysClean Adapter M

Accessories for all analyzers:

- [REF] 11298500316, Elecsys SysClean, 5 x 100 mL system cleaning solution

### Assay

For optimum performance of the assay follow the directions given in this document for the analyzer concerned. Refer to the appropriate operator's manual for analyzer-specific assay instructions.

Resuspension of the microparticles takes place automatically prior to use. Read in the test-specific parameters via the reagent barcode. If in exceptional cases the barcode cannot be read, enter the 15-digit sequence of numbers.

Bring the cooled reagents to approx. 20 °C and place on the reagent disk (20 °C) of the analyzer. Avoid foam formation. The system automatically regulates the temperature of the reagents and the opening/closing of the bottles.

### Calibration

Traceability: The Ferritin assay ([REF] 03737551) has been standardized against the Ferritin assay ([REF] 11820982). The Ferritin assay ([REF] 11820982) has been standardized against the Enzymun-Test Ferritin method. This in turn has been standardized against the 1st International Standard (IS) NIBSC (National Institute for Biological Standards and Control) "Reagent for Ferritin (human liver)" 80/602.

Recovery studies, including a published study,<sup>9</sup> to assess traceability of the Elecsys Ferritin assay to more recent international standards (2nd IS 80/578 and 3rd IS 94/572) have been conducted, with results showing very good agreement.

Every Elecsys reagent set has a barcoded label containing specific information for calibration of the particular reagent lot. The predefined master curve is adapted to the analyzer using the relevant CalSet.

**Calibration frequency:** Calibration must be performed once per reagent lot using fresh reagent (i.e. not more than 24 hours since the reagent kit was registered on the analyzer). Renewed calibration is recommended as follows:

- after 1 month (28 days) when using the same reagent lot
- after 7 days (when using the same reagent kit on the analyzer)
- as required: e.g. quality control findings outside the defined limits

### Quality control

For quality control, use PreciControl Tumor Marker or PreciControl Varia.

In addition, other suitable control material can be used.

Controls for the various concentration ranges should be run individually at least once every 24 hours when the test is in use, once per reagent kit, and following each calibration.

The control intervals and limits should be adapted to each laboratory's individual requirements. Values obtained should fall within the defined limits. Each laboratory should establish corrective measures to be taken if values fall outside the defined limits.

Follow the applicable government regulations and local guidelines for quality control.

### Calculation

The analyzer automatically calculates the analyte concentration of each sample (either in µg/L or ng/mL).

### Limitations - interference

The assay is unaffected by icterus (bilirubin < 1112 µmol/L or < 65 mg/dL), hemolysis (Hb < 0.31 mmol/L or < 0.5 g/dL), lipemia (Intralipid < 3300 mg/dL) and biotin (< 205 nmol/L or < 50 ng/mL).

Criterion: Recovery within ± 10 % of initial value.

Samples should not be taken from patients receiving therapy with high biotin doses (i.e. > 5 mg/day) until at least 8 hours following the last biotin administration.

No interference was observed from rheumatoid factors up to a concentration of 2500 IU/mL.

There is no high-dose hook effect at ferritin concentrations up to 100000 µg/L (ng/mL).

In vitro tests were performed on 19 commonly used pharmaceuticals. No interference with the assay was found.

Iron<sup>2+</sup>- and iron<sup>3+</sup>-ions at therapeutic concentrations do not interfere with the Elecsys Ferritin assay.

In rare cases, interference due to extremely high titers of antibodies to analyte-specific antibodies, streptavidin or ruthenium can occur. These effects are minimized by suitable test design.

For diagnostic purposes, the results should always be assessed in conjunction with the patient's medical history, clinical examination and other findings.

### Limits and ranges

#### Measuring range

0.500-2000 µg/L (ng/mL) (defined by the lower detection limit and the maximum of the master curve). Values below the lower detection limit are reported as < 0.500 µg/L (ng/mL). Values above the measuring range are reported as > 2000 µg/L (ng/mL) (or up to 100000 µg/L (ng/mL) for 50-fold diluted samples).

ms\_03737551190V14.0

# Ferritin

## Ferritin

### Lower limits of measurement

#### Lower detection limit of the test

Lower detection limit: 0.50 µg/L (ng/mL)

The lower detection limit represents the lowest measurable analyte level that can be distinguished from zero. It is calculated as the value lying two standard deviations above that of the lowest standard (master calibrator, standard 1 + 2 SD, repeatability study, n = 21).

### Dilution

Samples with ferritin concentrations above the measuring range can be diluted with Diluent Universal. The recommended dilution is 1:50 (either automatically by the MODULAR ANALYTICS E170, Elecsys 2010 or **cobas e** analyzers or manually). The concentration of the diluted sample must be > 40 µg/L (ng/mL).

After manual dilution, multiply the result by the dilution factor.

After dilution by the analyzers, the MODULAR ANALYTICS E170, Elecsys 2010 and **cobas e** software automatically takes the dilution into account when calculating the sample concentration.

### Expected values

Results of a study with the Enzymun-Test Ferritin method on samples from 224 healthy test subjects (104 women - mainly premenopausal - and 120 men) are given below. The values correspond to the 5<sup>th</sup> and 95<sup>th</sup> percentiles.<sup>10</sup>

Men, 20-60 years: 30-400 µg/L (ng/mL)

Women, 17-60 years: 13-150 µg/L (ng/mL)

Each laboratory should investigate the transferability of the expected values to its own patient population and if necessary determine its own reference ranges.

### Specific performance data

Representative performance data on the analyzers are given below. Results obtained in individual laboratories may differ.

### Precision

Precision was determined using Elecsys reagents, pooled human sera and controls in a protocol (EP5-A2) of the CLSI (Clinical and Laboratory Standards Institute): 2 runs per day in duplication each for 21 days (n = 84). The following results were obtained:

| Elecsys 2010 and <b>cobas e</b> 411 analyzers |                         |                       |         |                        |         |
|-----------------------------------------------|-------------------------|-----------------------|---------|------------------------|---------|
| Sample                                        | Mean<br>µg/L<br>(ng/mL) | Repeatability         |         | Intermediate precision |         |
|                                               |                         | SD<br>µg/L<br>(ng/mL) | CV<br>% | SD<br>µg/L<br>(ng/mL)  | CV<br>% |
| Human serum 1                                 | 1.45                    | 0.101                 | 7.0     | 0.168                  | 11.6    |
| Human serum 2                                 | 11.9                    | 0.411                 | 3.5     | 0.798                  | 6.7     |
| Human serum 3                                 | 19.2                    | 0.780                 | 4.1     | 1.47                   | 7.7     |
| Human serum 4                                 | 376                     | 10.8                  | 2.9     | 17.2                   | 4.6     |
| Human serum 5                                 | 1361                    | 26.5                  | 1.9     | 84.4                   | 6.2     |
| PreciControl Varia 1                          | 134                     | 1.96                  | 1.5     | 2.75                   | 2.1     |
| PreciControl Varia 2                          | 858                     | 15.1                  | 1.8     | 21.7                   | 2.5     |

| MODULAR ANALYTICS E170, <b>cobas e</b> 601 and <b>cobas e</b> 602 analyzers |                         |                       |         |                        |         |
|-----------------------------------------------------------------------------|-------------------------|-----------------------|---------|------------------------|---------|
| Sample                                                                      | Mean<br>µg/L<br>(ng/mL) | Repeatability         |         | Intermediate precision |         |
|                                                                             |                         | SD<br>µg/L<br>(ng/mL) | CV<br>% | SD<br>µg/L<br>(ng/mL)  | CV<br>% |
| Human serum 1                                                               | 1.12                    | 0.139                 | 12.4    | 0.263                  | 23.4    |
| Human serum 2                                                               | 12.3                    | 0.467                 | 3.8     | 0.789                  | 6.4     |
| Human serum 3                                                               | 20.5                    | 0.837                 | 4.1     | 1.67                   | 8.1     |
| Human serum 4                                                               | 392                     | 8.14                  | 2.1     | 16.9                   | 4.3     |

| MODULAR ANALYTICS E170, <b>cobas e</b> 601 and <b>cobas e</b> 602 analyzers |                         |                       |         |                        |         |
|-----------------------------------------------------------------------------|-------------------------|-----------------------|---------|------------------------|---------|
| Sample                                                                      | Repeatability           |                       |         | Intermediate precision |         |
|                                                                             | Mean<br>µg/L<br>(ng/mL) | SD<br>µg/L<br>(ng/mL) | CV<br>% | SD<br>µg/L<br>(ng/mL)  | CV<br>% |
| Human serum 5                                                               | 1449                    | 35.6                  | 2.5     | 92.8                   | 6.4     |
| PreciControl Varia 1                                                        | 140                     | 2.31                  | 1.7     | 3.53                   | 2.5     |
| PreciControl Varia 2                                                        | 900                     | 14.4                  | 1.6     | 25.0                   | 2.8     |

### Method comparison

A comparison of the Ferritin assay, [REF] 03737551 (y) with the Ferritin assay, [REF] 11820982 (x) using clinical samples gave the following correlations:

Number of samples measured: 134

Passing/Bablok<sup>11</sup> Linear regression

$y = 1.00x + 0.72$   $y = 0.99x + 4.11$

$\tau = 0.984$   $r = 0.999$

The sample concentrations were between approximately 2.68 and 1891 µg/L (ng/mL).

### Analytical specificity

Human liver ferritin: 100 % recovery

Human spleen ferritin: 85 % recovery

Human heart ferritin: 1 % recovery

### References

- Wick M, Pinggera W, Lehmann P. Ferritin in Iron Metabolism - Diagnosis of Anemias (second edition). Springer-Verlag 1995; ISBN 3-211-82525-8 and ISBN 0-387-82525-8.
- Arosio P, Levi S, Gabri E, et al. Heterogeneity of ferritin II: Immunological aspects. In: Albertini A, Arosio P, Chiancone E, Drysdale J (eds). Ferritins and iso-ferritins as biochemical markers. Elsevier, Amsterdam 1984;33-47.
- Kaltwasser JP, Werner E. Serumferritin: Methodische und Klinische Aspekte. Springer Verlag (1980).
- Morikawa K, Oseko F, Morikawa S. A role for ferritin in hematopoiesis and the immune system. Leuk-Lymphoma 1995;18(5-6):429-433.
- Borch-Johnson B. Determination of Iron status: brief review of physiological effects on iron measures. Analyst 1995;120(3):891-903.
- Cook JD, Skikne BS, Baynes RD. Iron deficiency: the global perspective. Adv-Exp-Med-Biol 1994;356:219-228.
- Albertini A, Arosio P, Chiancone E, et al. (eds). Functional aspects of iso-ferritins. In: Jacobs A, Hodgetts J, Hoy TG. Ferritins and iso-ferritins as biochemical markers. Elsevier, Amsterdam 1984;113-127.
- Guder WG, Narayanan S, Wisser H, et al. List of Analytes; Preanalytical Variables. Brochure in: Samples: From the Patient to the Laboratory. GIT-Verlag, Darmstadt 1996;14. ISBN 3-928865-22-6.
- Blackmore S, Hamilton M, Lee A, et al. Automated immunoassay methods for ferritin: recovery studies to assess traceability to an international standard. Clin Chem Lab Med 2008;46(10):1450-1457.
- Lotz J, Hafner G, Prellwitz W. Reference Study for Ferritin Assays. Kurzmittellung Clin Lab 1997;43(11):993-994.
- Bablok W, Passing H, Bender R, et al. A general regression procedure for method transformation. Application of linear regression procedures for method comparison studies in clinical chemistry, Part III. J Clin Chem Clin Biochem 1988 Nov;26(11):783-790.

For further information, please refer to the appropriate operator's manual for the analyzer concerned, the respective application sheets, the product information and the Method Sheets of all necessary components (if available in your country).

A point (period/stop) is always used in this Method Sheet as the decimal separator to mark the border between the integral and the fractional parts of a decimal numeral. Separators for thousands are not used.

ms\_03737551190V14.0

# Ferritin

## Ferritin

### Symbols

Roche Diagnostics uses the following symbols and signs in addition to those listed in the ISO 15223-1 standard.

|                                                                                   |                                                     |
|-----------------------------------------------------------------------------------|-----------------------------------------------------|
|  | Contents of kit                                     |
|  | Analyzers/Instruments on which reagents can be used |
|  | Reagent                                             |
|  | Calibrator                                          |
|  | Volume after reconstitution or mixing               |

COBAS, COBAS E, ELECSYS, MODULAR and PRECICONTROL are trademarks of Roche. INTRALIPID is a trademark of Fresenius Kabi AB.

All other product names and trademarks are the property of their respective owners.

Significant additions or changes are indicated by a change bar in the margin.

© 2013, Roche Diagnostics

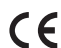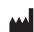

Roche Diagnostics GmbH, Sandhofer Strasse 116, D-68305 Mannheim  
www.roche.com

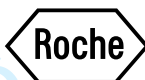**cobas**<sup>®</sup>

05944295500V8.0

# Elecsys Folate RBC

| REF         |             |     | SYSTEM                                                         |
|-------------|-------------|-----|----------------------------------------------------------------|
| 05944295190 | 05944295500 | 100 | <b>cobas e 411</b><br><b>cobas e 601</b><br><b>cobas e 602</b> |

## English

### System information

For **cobas e 411** analyzer: test number 1210

For **cobas e 601** and **cobas e 602** analyzers: Application Code Number 272

### Intended use

This assay is used for the in vitro quantitative determination of folate in erythrocytes (red blood cells, RBC). The electrochemiluminescence binding assay is intended for use on the Elecsys and **cobas e** immunoassay analyzers.

### Summary

Folate belongs to the family of B-group vitamins composed of an aromatic pteridine ring linked through a methylene group to p-aminobenzoic acid and a glutamate residue. Folate (folic acid) is vital for normal cellular functions and plays an essential role in nucleic acid synthesis, methionine regeneration, shuttling and redox reactions of one-carbon units required for normal metabolism and regulation.<sup>1,2</sup>

The folate metabolism can be exemplified as a cycle, where folate facilitates the transfer of one-carbon units from one molecule to another required in various biochemical reactions: for example, tetrahydrofolate (THF) accepts a single carbon unit from serine, which is reduced in a number of steps to 5-methyltetrahydrofolate (5-MTHF). 5-MTHF gives its methyl group to homocysteine, which is - with involvement of methionine synthase and vitamin B12 - enzymatically converted to methionine. The resulting THF starts again the cycle of methyl group synthesis. From methionine, the methyl groups are transferred to S-adenosylmethionine (SAM).<sup>3</sup> SAM serves as a methyl group donor in several methylation reactions, like DNA, RNA and protein methylation.<sup>1</sup>

The methionine cycle is highly sensitive to folate deficiency: with a low folate status, the ability of the cell to re-methylate homocysteine is impaired and this results in increased homocysteine concentrations in plasma.<sup>2</sup>

Folate also plays an essential role in the synthesis of purine and pyrimidine precursors of nucleic acids. Altered distribution of methyl groups and impaired DNA synthesis play an essential role in the development of cancers. Abnormal folate status has also been linked with the development of diseases like cardiovascular diseases, neural tube defects, cleft lip and palate, late pregnancy complications, neurodegenerative and psychiatric disorders.<sup>1,2</sup>

Folate belongs to the group of essential vitamins, i.e. it cannot be synthesized by the human organism and therefore must be absorbed from diet. Primary sources of folates are green and leafy vegetables, sprouts, fruits, brewer's yeast and liver.<sup>1,2</sup>

Folate deficiency can be caused by decreased nutritional intake, poor absorption of ingested folate in the intestine or increased demand of folate, for example during physical activity or pregnancy. Deficiency of folate can also be a result of liver diseases or impaired folate metabolism due to genetic defects or drug interactions.<sup>2</sup>

A clinical manifestation of both folate and vitamin B12 deficiency is the so called megaloblastic (macrocytic) anemia: due to the affected DNA synthesis and cell maturation, especially involving the cells of erythropoiesis, the total count of erythrocytes is significantly reduced. The hemoglobin synthesis capacity however is normal, which leads to abnormally large erythrocyte precursors ("macrocytes" or "megaloblasts"), which have an elevated hemoglobin content ("hyperchromic anemia").<sup>3,4</sup>

Serum folate concentrations may be affected by recent folate intakes, whereas red blood cell (RBC) folate is a measure of the folate intake across the 90-120 days lifespan of erythrocytes. Thus, folate concentrations in RBC give a more accurate picture of a patient's underlying folate status than serum folate concentrations, and are considered by experts as the better measure for folate status.<sup>5</sup>

Because vitamin B12 and folate are closely interrelated in the cellular one-carbon unit metabolism, and also hematologic and clinical consequences of the two vitamin deficiency states might be similar, it is

advisable to determine both parameters simultaneously in patients with the relevant symptoms of vitamin deficiency.<sup>3,4</sup>

### Test principle

Competition principle. Total duration of assay: 27 minutes.

Whole blood treated with anticoagulants (heparin or EDTA) is mixed with ascorbic acid solution and incubated for approximately 90 minutes at 20-25 °C. Lysis of the erythrocytes takes place, with liberation and stabilization of the intracellular folate. The resulting hemolysate sample is then used for subsequent measurement.

- 1st incubation: By incubating 25 µL of hemolysate sample with the folate pretreatment reagents 1 and 2, bound folate is released from endogenous folate binding proteins.
- 2nd incubation: By incubating the pretreated sample with the ruthenium labeled folate binding protein, a folate complex is formed, the amount of which is dependent upon the analyte concentration in the sample.
- 3rd incubation: After addition of streptavidin-coated microparticles and folate labeled with biotin, the unbound sites of the ruthenium labeled folate binding protein become occupied, with formation of a ruthenium labeled folate binding protein-folate biotin complex. The entire complex becomes bound to the solid phase via interaction of biotin and streptavidin.
- The reaction mixture is aspirated into the measuring cell where the microparticles are magnetically captured onto the surface of the electrode. Unbound substances are then removed with ProCell/ProCell M. Application of a voltage to the electrode then induces chemiluminescent emission which is measured by a photomultiplier.
- Results are determined via a calibration curve which is instrument-specifically generated by 2-point calibration and a master curve provided via the reagent barcode or e-barcode.

### Reagents - working solutions

The reagent rackpack (M, R1, R2) is labeled as RBC-FOL.

- PT1 Pretreatment reagent 1 (white cap), 1 bottle, 4 mL:  
Sodium 2-mercaptoethanesulfonate (MESNA) 40 g/L, pH 5.5.
- PT2 Pretreatment reagent 2 (gray cap), 1 bottle, 5 mL:  
Sodium hydroxide 25 g/L.
- M Streptavidin-coated microparticles (transparent cap), 1 bottle, 6.5 mL:  
Streptavidin-coated microparticles 0.72 mg/mL; preservative.
- R1 Folate binding protein~Ru(bpy)<sub>3</sub><sup>2+</sup> (gray cap), 1 bottle, 9 mL:  
Ruthenium labeled folate binding protein 75 µg/L; human serum albumin (stabilizer); borate/phosphate/citrate buffer 70 mmol/L, pH 5.5; preservative.
- R2 Folate-biotin (black cap), 1 bottle, 8 mL:  
Biotinylated folate 17 µg/L; biotin 120 µg/L; human serum albumin (stabilizer); borate buffer 100 mmol/L, pH 9.0; preservative.

### Precautions and warnings

For in vitro diagnostic use.

Exercise the normal precautions required for handling all laboratory reagents.

Disposal of all waste material should be in accordance with local guidelines. Safety data sheet available for professional user on request.

This kit contains components classified as follows in accordance with the Regulation (EC) No. 1272/2008:

2-methyl-2H-isothiazol-3-one hydrochloride

EUH 208 May produce an allergic reaction.

05944295500V8.0

# Elecsys Folate RBC

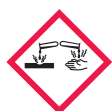

Danger

H290 May be corrosive to metals.

H314 Causes severe skin burns and eye damage.

**Prevention:**

P280 Wear protective gloves/ protective clothing/ eye protection/ face protection.

**Response:**

P301 + P330 IF SWALLOWED: Rinse mouth. Do NOT induce vomiting. + P331

P303 + P361 IF ON SKIN (or hair): Take off immediately all contaminated clothing. Rinse skin with water. + P353

P304 + P340 IF INHALED: Remove person to fresh air and keep comfortable for breathing. + P310 Immediately call a POISON CENTER/ doctor.

P305 + P351 IF IN EYES: Rinse cautiously with water for several minutes. Remove contact lenses, if present and easy to do. + P338 Continue rinsing. Immediately call a POISON CENTER/ doctor. + P310

P390 Absorb spillage to prevent material damage.

Product safety labeling follows EU GHS guidance.

Contact phone: all countries: +49-621-7590

All human material should be considered potentially infectious. All products derived from human blood are prepared exclusively from the blood of donors tested individually and shown to be free from HBsAg and antibodies to HCV and HIV. The testing methods used assays approved by the FDA or cleared in compliance with the European Directive 98/79/EC, Annex II, List A.

However, as no testing method can rule out the potential risk of infection with absolute certainty, the material should be handled with the same level of care as a patient specimen. In the event of exposure, the directives of the responsible health authorities should be followed.<sup>6,7</sup>

Avoid foam formation in all reagents and sample types (specimens, calibrators and controls).

**Reagent handling**

The reagents in the kit have been assembled into a ready-for-use unit that cannot be separated.

All information required for correct operation is read in from the respective reagent barcodes.

**Storage and stability**

Store at 2-8 °C.

Do not freeze.

Store the Elecsys reagent kit **upright** in order to ensure complete availability of the microparticles during automatic mixing prior to use.

|                         |                                  |
|-------------------------|----------------------------------|
| Stability:              |                                  |
| unopened at 2-8 °C      | up to the stated expiration date |
| after opening at 2-8 °C | 8 weeks                          |
| on the analyzers        | 2 weeks                          |

**Specimen collection and preparation**

Only the specimens listed below were tested and found acceptable.

Hemolysate prepared from whole blood treated with anticoagulants (Na-heparin or K<sub>3</sub>-EDTA).

- For the determination of folate in RBC: Determine hematocrit in whole blood samples and record the value.

- Preparation of the hemolysate sample

Mix 3.0 mL of Folate RBC Hemolyzing Reagent (ascorbic acid solution, 0.2 %) and 100 µL of well-mixed whole blood, avoiding foam formation. Incubate with closed caps for 90 ± 15 minutes at 20-25 °C.

Stability:

Whole blood: 2 hours at 20-25 °C<sup>8</sup>, 24 hours at 2-8 °C, 1 month at -20 °C (± 5 °C) (only EDTA-blood).

Hemolysate sample: 1 month at -20 °C (± 5 °C), freeze only once.

The sample types listed were tested with a selection of sample collection tubes that were commercially available at the time of testing, i.e. not all available tubes of all manufacturers were tested. Sample collection systems from various manufacturers may contain differing materials which could affect the test results in some cases. When processing samples in primary tubes (sample collection systems), follow the instructions of the tube manufacturer.

Samples should not subsequently be altered with additives (biocides, anti-oxidants or substances possibly changing the pH of the sample) in order to avoid erroneous folate recovery.

Ensure the samples, calibrators and controls are at 20-25 °C prior to measurement.

Due to possible evaporation effects, samples, calibrators and controls on the analyzers should be analyzed/measured within 2 hours.

If measurements cannot be carried out within 2 hours please store the hemolysate sample at -20 °C (± 5 °C).

**Materials provided**

See "Reagents – working solutions" section for reagents.

**Materials required (but not provided)**

- [REF] 05944309190, Folate RBC CalSet, for 4 x 1.0 mL
- [REF] 05944317190, Folate RBC Hemolyzing Reagent kit for 4 x 200 mL, contains ascorbic acid

- General laboratory equipment

- cobas e** analyzer

Additional materials for the **cobas e** 411 analyzer:

- [REF] 11662988122, ProCell, 6 x 380 mL system buffer
- [REF] 11662970122, CleanCell, 6 x 380 mL measuring cell cleaning solution
- [REF] 11930346122, Elecsys SysWash, 1 x 500 mL washwater additive
- [REF] 11933159001, Adapter for SysClean
- [REF] 11706802001, AssayCup, 60 x 60 reaction cups
- [REF] 11706799001, AssayTip, 30 x 120 pipette tips
- [REF] 11800507001, Clean-Liner

Additional materials for **cobas e** 601 and **cobas e** 602 analyzers:

- [REF] 04880340190, ProCell M, 2 x 2 L system buffer
- [REF] 04880293190, CleanCell M, 2 x 2 L measuring cell cleaning solution
- [REF] 03023141001, PC/CC-Cups, 12 cups to prewarm ProCell M and CleanCell M before use
- [REF] 03005712190, ProbeWash M, 12 x 70 mL cleaning solution for run finalization and rinsing during reagent change
- [REF] 03004899190, PreClean M, 5 x 600 mL detection cleaning solution
- [REF] 12102137001, AssayTip/AssayCup, 48 magazines x 84 reaction cups or pipette tips, waste bags
- [REF] 03023150001, WasteLiner, waste bags
- [REF] 03027651001, SysClean Adapter M

Additional materials for all analyzers:

- [REF] 11298500316, ISE Cleaning Solution/Elecsys SysClean, 5 x 100 mL system cleaning solution



05944295500V8.0

# Elecsys Folate RBC



error of  $\leq 30\%$ . It has been determined using low concentration folate samples.

## Dilution

Hemolysate samples with folate concentrations above the measuring range can be diluted manually with Elecsys Folate RBC Hemolyzing Reagent (ascorbic acid solution, 0.2%). The recommended dilution is 1:2. The concentration of the diluted sample must be  $> 265$  ng/mL or  $> 602$  nmol/L. After manual dilution, multiply the results by the dilution factor 2.

## Expected values

The values shown below were measured on samples from an apparently healthy population, using the Elecsys Folate III/RBC application. The values can be applied for the Elecsys Folate RBC assay on all Elecsys and cobas e analyzers. The calculation is based on 290 sera (96 men, 194 women) from an European population. The age range was between 18 and 65 years. Pregnant or lactating women were excluded. The reference population was selected according to normal homocysteine values. The following values were obtained:

| Whole blood folate (from hemolysate samples) |     |        |       |                                                  |         |
|----------------------------------------------|-----|--------|-------|--------------------------------------------------|---------|
|                                              | N   | Median |       | 2.5 <sup>th</sup> -97.5 <sup>th</sup> percentile |         |
|                                              |     | nmol/L | ng/mL | nmol/L                                           | ng/mL   |
| Europe                                       | 290 | 673    | 296   | 481-1212                                         | 212-534 |

The measured hematocrit value in this study showed a range from 37.1-46.1%.

| RBC folate (folate in erythrocyte fraction) |     |        |       |                                                  |          |
|---------------------------------------------|-----|--------|-------|--------------------------------------------------|----------|
|                                             | N   | Median |       | 2.5 <sup>th</sup> -97.5 <sup>th</sup> percentile |          |
|                                             |     | nmol/L | ng/mL | nmol/L                                           | ng/mL    |
| Europe                                      | 290 | 1657   | 730   | 1187-2854                                        | 523-1257 |

If pathologically low hematocrit values are considered for calculation of RBC folate in the erythrocyte fraction, elevated RBC folate concentrations may be observed. No medical conclusion should be based on the calculation considering hematocrit values in such cases. Instead, whole blood folate results (from hemolysate samples) and suitable expected values may be used.

Each laboratory should investigate the transferability of the expected values to its own patient population and if necessary determine its own reference ranges.

## Specific performance data

Representative performance data on the analyzers are given below. Results obtained in individual laboratories may differ.

## Precision

Precision was determined using Elecsys reagents and hemolysate samples in a protocol (EP5-A2) of the CLSI (Clinical and Laboratory Standards Institute): 2 runs per day in duplicate each for 21 days (n = 84). Results are given as whole blood folate (from hemolysate sample). The following results were obtained:

| cobas e 411 analyzer |        |       |               |       |     |                        |       |      |
|----------------------|--------|-------|---------------|-------|-----|------------------------|-------|------|
| Sample               | Mean   |       | Repeatability |       |     | Intermediate precision |       |      |
|                      | SD     |       | CV            |       | SD  |                        | CV    |      |
|                      | nmol/L | ng/mL | nmol/L        | ng/mL | %   | nmol/L                 | ng/mL | %    |
| HL <sup>a)</sup> 1   | 154    | 68.0  | 11.7          | 5.17  | 7.6 | 21.9                   | 9.65  | 14.2 |
| HL 2                 | 352    | 155   | 17.5          | 7.73  | 5.0 | 27.7                   | 12.2  | 7.9  |
| HL 3                 | 618    | 272   | 25.4          | 11.2  | 4.1 | 38.4                   | 16.9  | 6.2  |
| HL 4                 | 1195   | 527   | 38.8          | 17.1  | 3.3 | 56.3                   | 24.8  | 4.7  |

a) HL = Hemolysate

| cobas e 601 and cobas e 602 analyzers |        |       |               |       |     |                        |       |      |
|---------------------------------------|--------|-------|---------------|-------|-----|------------------------|-------|------|
| Sample                                | Mean   |       | Repeatability |       |     | Intermediate precision |       |      |
|                                       | SD     |       | CV            |       | SD  |                        | CV    |      |
|                                       | nmol/L | ng/mL | nmol/L        | ng/mL | %   | nmol/L                 | ng/mL | %    |
| HL 1                                  | 138    | 61.0  | 12.1          | 5.31  | 8.8 | 14.3                   | 6.32  | 10.4 |
| HL 2                                  | 434    | 191   | 26.1          | 11.5  | 6.0 | 28.4                   | 12.5  | 6.5  |
| HL 3                                  | 586    | 258   | 32.0          | 14.1  | 5.5 | 34.3                   | 15.1  | 5.9  |
| HL 4                                  | 1317   | 580   | 29.1          | 12.8  | 2.2 | 44.7                   | 19.7  | 3.4  |

## Method comparison

a) A comparison of the Elecsys Folate RBC assay (calibrated with Folate RBC CalSet; y) and the Elecsys Folate III/RBC application (calibrated with Folate III CalSet; x) using hemolyzed clinical samples gave the following correlations (ng/mL). Results are given as whole blood folate (from hemolysate sample).

Number of samples measured: 187

Passing/Bablok<sup>9</sup> Linear regression

$$y = 1.02x - 14.1 \quad y = 1.00x - 12.0$$

$$\tau = 0.869 \quad r = 0.985$$

The sample concentrations were between 151 and 551 ng/mL (343 and 1251 nmol/L).

b) A comparison of the Elecsys Folate RBC assay on the MODULAR ANALYTICS E170 analyzer (y) with the Elecsys Folate RBC assay on the Elecsys 2010 analyzer (x) (both tests have been calibrated with Folate RBC CalSet) using hemolyzed clinical samples gave the following correlations (ng/mL). Results are given as whole blood folate (from hemolysate sample).

Number of samples measured: 187

Passing/Bablok Linear regression

$$y = 1.04x + 1.94 \quad y = 1.02x + 8.07$$

$$\tau = 0.814 \quad r = 0.970$$

The sample concentrations were between 137 and 557 ng/mL (311 and 1264 nmol/L).

## References

- Nazki FH, Sameer AS, Ganaie BA. Folate: Metabolism, genes, polymorphisms and the associated diseases. *Gene* 2014;533(1):11-20.
- Scaglione F, Panzavolta G. Folate, folic acid and 5-methyltetrahydrofolate are not the same thing. *Xenobiotica* 2014;44(5):480-488.
- Reynolds EH. The neurology of folic acid deficiency. *Handb Clin Neurol* 2014;120:927-43.
- Wick M, Pinggera W, Lehmann P. *Clinical Aspects and Laboratory. Iron metabolism, Anemias.* Springer Verlag, Wien, New York, 6th edition 2011:41-42.
- Yetley EA, Pfeiffer CM, Phinney KW, et al. Biomarkers of folate status in NHANES: a roundtable summary. *Am J Clin Nutr* 2011;94(1):303S-312S.
- Occupational Safety and Health Standards: Bloodborne pathogens. (29 CFR Part 1910.1030). Fed. Register.
- Directive 2000/54/EC of the European Parliament and Council of 18 September 2000 on the protection of workers from risks related to exposure to biological agents at work.
- Eijdsden M, van der Wal MF, Hornstra G, et al. Can whole blood samples be stored over 24 hours without compromising stability of C-Reactive Protein, Retinol, Ferritin, Folic Acid and Fatty Acids in Epidemiology Research? *Clin Chem* 2005;51(1):230-232.
- Bablok W, Passing H, Bender R, et al. A general regression procedure for method transformation. Application of linear regression procedures for method comparison studies in clinical chemistry, Part III. *J Clin Chem Clin Biochem* 1988 Nov;26(11):783-790.

05944295500V8.0

# Elecsys Folate RBC



For further information, please refer to the appropriate operator's manual for the analyzer concerned, the respective application sheets, the product information and the Method Sheets of all necessary components (if available in your country).

A point (period/stop) is always used in this Method Sheet as the decimal separator to mark the border between the integral and the fractional parts of a decimal numeral. Separators for thousands are not used.

## Symbols

Roche Diagnostics uses the following symbols and signs in addition to those listed in the ISO 15223-1 standard (for USA: see [dialog. Roche.com](http://dialog. Roche.com) for definition of symbols used):

|                                                                                   |                                                     |
|-----------------------------------------------------------------------------------|-----------------------------------------------------|
|  | Contents of kit                                     |
|  | Analyzers/Instruments on which reagents can be used |
|  | Reagent                                             |
|  | Calibrator                                          |
|  | Volume after reconstitution or mixing               |
|  | Global Trade Item Number                            |

COBAS, COBAS E, ELECSYS and PRECICONTROL are trademarks of Roche. INTRALIPID is a trademark of Fresenius Kabi AB.

All other product names and trademarks are the property of their respective owners.

Additions, deletions or changes are indicated by a change bar in the margin.

© 2020, Roche Diagnostics

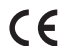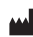

Roche Diagnostics GmbH, Sandhofer Strasse 116, D-68305 Mannheim  
[www.Roche.com](http://www.Roche.com)

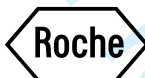



0004628918190c501V12.0

# CRPHS



## Cardiac C-Reactive Protein (Latex) High Sensitive

### Order information

| REF          | CONTENT                                                       | Analyzer(s) on which <b>cobas c</b> pack(s) can be used                      |
|--------------|---------------------------------------------------------------|------------------------------------------------------------------------------|
| 04628918 190 | Cardiac C-Reactive Protein (Latex) High Sensitive (300 tests) | System-ID 07 6866 9 Roche/Hitachi <b>cobas c</b> 311, <b>cobas c</b> 501/502 |
| 11355279 216 | Calibrator f.a.s. Proteins (5 x 1 mL)                         | Code 656                                                                     |
| 11355279 160 | Calibrator f.a.s. Proteins (5 x 1 mL, for USA)                | Code 656                                                                     |
| 20766321 322 | CRP T Control N (5 x 0.5 mL)                                  | Code 235                                                                     |
| 10557897 122 | Precinorm Protein (3 x 1 mL)                                  | Code 302                                                                     |
| 10557897 160 | Precinorm Protein (3 x 1 mL, for USA)                         | Code 302                                                                     |
| 05117003 190 | PreciControl ClinChem Multi 1 (20 x 5 mL)                     | Code 391                                                                     |
| 05947626 190 | PreciControl ClinChem Multi 1 (4 x 5 mL)                      | Code 391                                                                     |
| 05947626 160 | PreciControl ClinChem Multi 1 (4 x 5 mL, for USA)             | Code 391                                                                     |
| 04489357 190 | Diluent NaCl 9 % (50 mL)                                      | System-ID 07 6869 3                                                          |

### English

#### System information

For **cobas c** 311/501 analyzers:

**CRPHS**: ACN 217

For **cobas c** 502 analyzer:

**CRPHS**: ACN 8217

#### Intended use

In vitro test for the quantitative determination of C-reactive protein (CRP) in human serum and plasma on Roche/Hitachi **cobas c** systems. Measurement of CRP is of use for the detection and evaluation of inflammatory disorders and associated diseases, infection and tissue injury. Highly sensitive measurement of CRP may also be used as an aid in the assessment of the risk of future coronary heart disease. When used as an adjunct to other laboratory evaluation methods of acute coronary syndromes, it may also be an additional independent indicator of recurrent event prognosis in patients with stable coronary disease or acute coronary syndrome.

#### Summary<sup>1,2,3,4,5,6,7,8,9,10,11,12,13,14,15,16,17,18,19,20,21</sup>

C-reactive protein is the classic acute phase protein in inflammatory reactions. It is synthesized by the liver and consists of five identical polypeptide chains that form a five-member ring having a molecular weight of 105000 daltons. CRP is the most sensitive of the acute phase reactants and its concentration increases rapidly during inflammatory processes. Complexed CRP activates the complement system beginning with C1q. CRP then initiates opsonization and phagocytosis of invading cells, but its main function is to bind and detoxify endogenous toxic substances produced as a result of tissue damage.

CRP assays are used to detect systemic inflammatory processes (apart from certain types of inflammation such as SLE and Colitis ulcerosa); to assess treatment of bacterial infections with antibiotics; to detect intrauterine infections with concomitant premature amniorrhexis; to differentiate between active and inactive forms of disease with concurrent infection, e.g. in patients suffering from SLE or Colitis ulcerosa; to therapeutically monitor rheumatic disease and assess anti-inflammatory therapy; to determine the presence of post-operative complications at an early stage, such as infected wounds, thrombosis and pneumonia, and to distinguish between infection and bone marrow transplant rejection.

Sensitive CRP measurements have been used and discussed for early detection of infection in pediatrics and risk assessment of coronary heart disease. Several studies came to the conclusion that the highly sensitive measurement of CRP could be used as a marker to predict the risk of coronary heart disease in apparently healthy persons and as an indicator of recurrent event prognosis. Increases in CRP values are non-specific and should not be interpreted without a complete clinical history. The American Heart Association and the Centers for Disease Control and Prevention have made several recommendations concerning the use of high sensitivity C-Reactive Protein (hsCRP) in cardiovascular risk assessment.<sup>21</sup> Testing for any risk assessment should not be performed while there is an indication of infection, systemic inflammation or trauma. Patients with persistently unexplained hsCRP levels above 10 mg/L (95.2 nmol/L) should be evaluated for non-cardiovascular etiologies. When using hsCRP to assess the risk of coronary heart disease, measurements should be made on metabolically stable patients and compared to previous values.

Optimally, the average of hsCRP results repeated two weeks apart should be used for risk assessment. Screening the entire adult population for hsCRP is not recommended, and hsCRP is not a substitute for traditional cardiovascular risk factors. Acute coronary syndrome management should not depend solely on hsCRP measurements. Similarly, application of secondary prevention measures should be based on global risk assessment and not solely on hsCRP measurements. Serial measurements of hsCRP should not be used to monitor treatment.

Various assay methods are available for CRP determination, such as nephelometry and turbidimetry. The Roche CRP assay is based on the principle of particle-enhanced immunological agglutination.

#### Test principle<sup>22,23</sup>

Particle enhanced immunoturbidimetric assay.

Human CRP agglutinates with latex particles coated with monoclonal anti-CRP antibodies. The precipitate is determined turbidimetrically.

#### Reagents - working solutions

**R1** TRIS buffer with bovine serum albumin and immunoglobulins (mouse); preservative; stabilizers

**R2** Latex particles coated with anti-CRP (mouse) in glycine buffer; preservative; stabilizers

R1 is in position B and R2 is in position C.

#### Precautions and warnings

For in vitro diagnostic use.

Exercise the normal precautions required for handling all laboratory reagents.

Disposal of all waste material should be in accordance with local guidelines. Safety data sheet available for professional user on request.

For USA: Caution: Federal law restricts this device to sale by or on the order of a physician.

#### Reagent handling

Ready for use

Mix **cobas c** pack well before placing on the analyzer.

Carefully invert reagent container several times prior to use to ensure that the reagent components are mixed.

#### Storage and stability

##### CRPHS

Shelf life at 2-8 °C: See expiration date on **cobas c** pack label.

On-board in use and refrigerated on the analyzer: 12 weeks

##### Diluent NaCl 9 %

Shelf life at 2-8 °C: See expiration date on **cobas c** pack label.

On-board in use and refrigerated on the analyzer: 12 weeks

0004628918190c501V12.0

# CRPHS

**cobas**<sup>®</sup>

## Cardiac C-Reactive Protein (Latex) High Sensitive

### Specimen collection and preparation

For specimen collection and preparation only use suitable tubes or collection containers.

Only the specimens listed below were tested and found acceptable. Serum.

Plasma: Li-heparin and K<sub>2</sub>-EDTA plasma

The sample types listed were tested with a selection of sample collection tubes that were commercially available at the time of testing, i.e. not all available tubes of all manufacturers were tested. Sample collection systems from various manufacturers may contain differing materials which could affect the test results in some cases. When processing samples in primary tubes (sample collection systems), follow the instructions of the tube manufacturer.

Centrifuge samples containing precipitates before performing the assay.

See the limitations and interferences section for details about possible sample interferences.

Sample stability claims were established by experimental data by the manufacturer or based on reference literature and only for the temperatures/time frames as stated in the method sheet. It is the responsibility of the individual laboratory to use all available references and/or its own studies to determine specific stability criteria for its laboratory.

|                          |                           |
|--------------------------|---------------------------|
| Stability: <sup>24</sup> | 11 days at 15-25 °C       |
|                          | 2 months at 2-8 °C        |
|                          | 3 years at (-15)-(-25) °C |

### Materials provided

See "Reagents – working solutions" section for reagents.

### Materials required (but not provided)

- See "Order information" section
- General laboratory equipment

### Assay

For optimum performance of the assay follow the directions given in this document for the analyzer concerned. Refer to the appropriate operator's manual for analyzer-specific assay instructions.

The performance of applications not validated by Roche is not warranted and must be defined by the user.

### Application for serum and plasma

#### cobas c 311 test definition

|                              |                            |       |  |
|------------------------------|----------------------------|-------|--|
| Assay type                   | Rate A                     |       |  |
| Reaction time / Assay points | 10/7-57                    |       |  |
| Wavelength (sub/main)        | – /546 nm                  |       |  |
| Reaction direction           | Increase                   |       |  |
| Units                        | mg/L (nmol/L, mg/dL)       |       |  |
| Reagent pipetting            | Diluent (H <sub>2</sub> O) |       |  |
| R1                           | 82 µL                      | 42 µL |  |
| R2                           | 28 µL                      | 20 µL |  |

| Sample volumes | Sample | Sample dilution |                |
|----------------|--------|-----------------|----------------|
|                |        | Sample          | Diluent (NaCl) |
| Normal         | 6 µL   | –               | –              |
| Decreased      | 6 µL   | 10 µL           | 140 µL         |
| Increased      | 6 µL   | –               | –              |

#### cobas c 501 test definition

|                              |           |  |  |
|------------------------------|-----------|--|--|
| Assay type                   | Rate A    |  |  |
| Reaction time / Assay points | 10/12-70  |  |  |
| Wavelength (sub/main)        | – /546 nm |  |  |

|                    |                            |       |  |
|--------------------|----------------------------|-------|--|
| Reaction direction | Increase                   |       |  |
| Units              | mg/L (nmol/L, mg/dL)       |       |  |
| Reagent pipetting  | Diluent (H <sub>2</sub> O) |       |  |
| R1                 | 82 µL                      | 42 µL |  |
| R2                 | 28 µL                      | 20 µL |  |

| Sample volumes | Sample | Sample dilution |                |
|----------------|--------|-----------------|----------------|
|                |        | Sample          | Diluent (NaCl) |
| Normal         | 6 µL   | –               | –              |
| Decreased      | 6 µL   | 10 µL           | 140 µL         |
| Increased      | 6 µL   | –               | –              |

#### cobas c 502 test definition

|                              |                            |       |  |
|------------------------------|----------------------------|-------|--|
| Assay type                   | Rate A                     |       |  |
| Reaction time / Assay points | 10/12-70                   |       |  |
| Wavelength (sub/main)        | – /546 nm                  |       |  |
| Reaction direction           | Increase                   |       |  |
| Units                        | mg/L (nmol/L, mg/dL)       |       |  |
| Reagent pipetting            | Diluent (H <sub>2</sub> O) |       |  |
| R1                           | 82 µL                      | 42 µL |  |
| R2                           | 28 µL                      | 20 µL |  |

| Sample volumes | Sample | Sample dilution |                |
|----------------|--------|-----------------|----------------|
|                |        | Sample          | Diluent (NaCl) |
| Normal         | 6 µL   | –               | –              |
| Decreased      | 6 µL   | 10 µL           | 140 µL         |
| Increased      | 12 µL  | –               | –              |

### Calibration

|                       |                                                                                                                                                               |           |  |
|-----------------------|---------------------------------------------------------------------------------------------------------------------------------------------------------------|-----------|--|
| Calibrators           | S1: H <sub>2</sub> O                                                                                                                                          |           |  |
|                       | S2: C.f.a.s. Proteins                                                                                                                                         |           |  |
|                       | Multiply the lot-specific C.f.a.s. Proteins calibrator value by the factors below to determine the standard concentrations for the 6-point calibration curve: |           |  |
|                       | S2: 0.0125                                                                                                                                                    | S5: 0.100 |  |
|                       | S3: 0.0250                                                                                                                                                    | S6: 0.200 |  |
|                       | S4: 0.0500                                                                                                                                                    |           |  |
| Calibration mode      | Line Graph                                                                                                                                                    |           |  |
| Calibration frequency | Full calibration                                                                                                                                              |           |  |
|                       | <ul style="list-style-type: none"> <li>after reagent lot change</li> <li>as required following quality control procedures</li> </ul>                          |           |  |

Calibration interval may be extended based on acceptable verification of calibration by the laboratory.

Traceability: This method has been standardized against the reference preparation of the IRMM (Institute for Reference Materials and Measurements) BCR470/CRM470 (RPPHS - Reference Preparation for Proteins in Human Serum).<sup>25</sup>

### Quality control

For quality control, use control materials as listed in the "Order information" section.

In addition, other suitable control material can be used.

The control intervals and limits should be adapted to each laboratory's individual requirements. Values obtained should fall within the defined

0004628918190c501V12.0

# CRPHS

## Cardiac C-Reactive Protein (Latex) High Sensitive



limits. Each laboratory should establish corrective measures to be taken if values fall outside the defined limits.

Follow the applicable government regulations and local guidelines for quality control.

### Calculation

Roche/Hitachi **cobas c** systems automatically calculate the analyte concentration of each sample.

Conversion factors: mg/L x 9.52 = nmol/L

mg/L x 0.1 = mg/dL

### Limitations - interference

Criterion: Recovery within ± 10 % of initial values at CRP levels of 1.0 mg/L.

Icterus:<sup>26</sup> No significant interference up to an I index of 60 for conjugated bilirubin and unconjugated bilirubin (approximate conjugated and unconjugated bilirubin concentration: 60 mg/dL or 1026 µmol/L).

Hemolysis:<sup>26</sup> No significant interference up to an H index of 1000 (approximate hemoglobin concentration: 622 µmol/L or 1000 mg/dL).

Lipemia (Intralipid):<sup>26</sup> No significant interference up to an L index of 600. There is poor correlation between the L index (corresponds to turbidity) and triglycerides concentration.

Rheumatoid factors: No significant interference from rheumatoid factors up to a concentration of 1200 IU/mL.

Drugs: No interference was found at therapeutic concentrations using common drug panels.<sup>27,28</sup>

Therapeutic drugs: Significantly decreased CRP values may be obtained from samples taken from patients who have been treated with carboxypenicillins.

High dose hook-effect: No false result occurs up to a CRP concentration of 1000 mg/L.

In very rare cases, gammopathy, in particular type IgM (Waldenström's macroglobulinemia), may cause unreliable results.<sup>29</sup>

Although measures were taken to minimize interference caused by human anti-mouse antibodies, erroneous findings may be obtained from samples taken from patients who have been treated with monoclonal mouse antibodies or have received them for diagnostic purposes.

For diagnostic purposes, the results should always be assessed in conjunction with the patient's medical history, clinical examination and other findings.

### ACTION REQUIRED

**Special Wash Programming:** The use of special wash steps is mandatory when certain test combinations are run together on Roche/Hitachi **cobas c** systems. The latest version of the carry-over evasion list can be found with the NaOHD-SMS-SmpCln1+2-SCCS Method Sheets. For further instructions refer to the operator's manual. **cobas c** 502 analyzer: All special wash programming necessary for avoiding carry-over is available via the **cobas** link, manual input is required in certain cases.

**Where required, special wash/carry-over evasion programming must be implemented prior to reporting results with this test.**

### Limits and ranges

#### Measuring range

0.15-20.0 mg/L (1.43-190 nmol/L, 0.015-2.0 mg/dL)

Determine samples having higher concentrations via the rerun function. Dilution of samples via the rerun function is a 1:15 dilution. Results from samples diluted using the rerun function are automatically multiplied by a factor of 15.

#### Lower limits of measurement

*Lower detection limit of the test*

0.15 mg/L (1.43 nmol/L, 0.015 mg/dL)

The lower detection limit represents the lowest measurable analyte level that can be distinguished from zero. It is calculated as the value lying 3 standard deviations above that of the lowest standard (standard 1 + 3 SD, repeatability, n = 21).

#### Functional sensitivity

0.3 mg/L (2.96 nmol/L, 0.03 mg/dL)

The functional sensitivity is the lowest CRP concentration that can be reproducibly measured with an inter-assay coefficient of variation of < 10 %.

### Expected values

Consensus reference interval for adults:<sup>30</sup>

IFCC/CRM 470

| mg/dL | mg/L  | nmol/L |
|-------|-------|--------|
| < 0.5 | < 5.0 | < 47.6 |

The CDC/AHA recommended the following hsCRP cut-off points (tertiles) for CVD risk assessment:<sup>21,31</sup>

| hsCRP level (mg/L) | hsCRP level (nmol/L) | Relative risk |
|--------------------|----------------------|---------------|
| < 1.0              | < 9.52               | low           |
| 1.0-3.0            | 9.52-28.6            | average       |
| > 3.0              | > 28.6               | high          |

Patients with higher hsCRP concentrations are more likely to develop myocardial infarction and severe peripheral vascular disease.

5-95 % reference intervals of neonates and children:<sup>32</sup>

Neonates (0-3 weeks): 0.1-4.1 mg/L (0.95-39.0 nmol/L)

Children (2 months-15 years): 0.1-2.8 mg/L (0.95-26.7 nmol/L)

### It is important to monitor the CRP concentration during the acute phase of the illness.

Roche has not evaluated reference ranges in a pediatric population.

Each laboratory should investigate the transferability of the expected values to its own patient population and if necessary determine its own reference ranges.

Increases in CRP values are non-specific and should not be interpreted without a complete clinical history.

When using hsCRP to assess the risk of coronary heart disease, measurements should be made on metabolically stable patients and compared to previous values. Optimally, the average of hsCRP results repeated two weeks apart should be used for risk assessment.

Measurements should be compared to previous values. When the results are being used for risk assessment, patients with persistently unexplained hsCRP levels of above 10 mg/L (95.2 nmol/L) should be evaluated for non-cardiovascular origins. Testing for any risk assessment should not be performed while there is indication of infection, systemic inflammation or trauma.<sup>21</sup>

### Specific performance data

Representative performance data on the analyzers are given below. Results obtained in individual laboratories may differ.

#### Precision

Precision was determined using human samples and controls in an internal protocol with repeatability (n = 21) and intermediate precision (3 aliquots per run, 1 run per day, 21 days). The following results were obtained:

|                               | Mean                        | SD                          | CV                   |           |
|-------------------------------|-----------------------------|-----------------------------|----------------------|-----------|
|                               |                             |                             | mg/L (nmol/L, mg/dL) | %         |
| Precinorm Protein             | 9.00 (85.7, 0.900)          | 0.10 (1.0, 0.010)           |                      | 1.2       |
| CRP T Control N               | 4.34 (41.3, 0.434)          | 0.04 (0.4, 0.004)           |                      | 1.0       |
| Human serum 1                 | 15.9 (151, 1.59)            | 0.1 (1, 0.01)               |                      | 0.4       |
| Human serum 2                 | 0.54 (5.14, 0.054)          | 0.01 (0.10, 0.001)          |                      | 1.6       |
| <i>Intermediate precision</i> | <i>Mean</i>                 | <i>SD</i>                   |                      | <i>CV</i> |
|                               | <i>mg/L (nmol/L, mg/dL)</i> | <i>mg/L (nmol/L, mg/dL)</i> |                      | <i>%</i>  |
| Precinorm Protein             | 9.06 (86.3, 0.906)          | 0.11 (1.1, 0.011)           |                      | 1.3       |
| CRP T Control N               | 4.28 (40.8, 0.428)          | 0.11 (1.1, 0.011)           |                      | 2.6       |
| Human serum 3                 | 13.3 (126, 1.33)            | 0.3 (3, 0.03)               |                      | 2.1       |
| Human serum 4                 | 0.53 (5.05, 0.053)          | 0.05 (0.48, 0.005)          |                      | 8.4       |

### Method comparison

CRP values for human serum and plasma samples obtained on a Roche/Hitachi **cobas c** 501 analyzer (y) were compared with those

0004628918190c501V12.0

# CRPHS

## Cardiac C-Reactive Protein (Latex) High Sensitive

determined using the corresponding reagent on a Roche/Hitachi 917 analyzer (x).

Sample size (n) = 192

Passing/Bablok<sup>33</sup> Linear regression

$y = 0.992x + 0.254 \text{ mg/L}$   $y = 0.946x + 0.514 \text{ mg/L}$

$\tau = 0.944$   $r = 0.996$

The sample concentrations were between 0.500 and 19.7 mg/L (4.76 and 188 nmol/L, 0.050 and 1.97 mg/dL).

### References

- Henry JB, ed. *Clinical Diagnosis and Management by Laboratory Methods*. Vol II. Philadelphia, Pa: WB Saunders 1979.
- Greiling H, Gressner AM, eds. *Lehrbuch der Klinischen Chemie und Pathobiochemie*, 3rd ed. Stuttgart/New York: Schattauer Verlag 1995:234-236.
- Thomas L, Messenger M. *Pathobiochemie und Labordiagnostik der Entzündung*. Lab med 1993;17:179-194.
- Young B, Gleeson M, Cripps AW. C-reactive protein: A critical review. *Pathology* 1991;23:118-124.
- Tietz NW. *Clinical Guide to Laboratory Tests*. 3rd ed. Philadelphia, Pa: WB Saunders Co; 1995.
- Wasunna A, Whitelaw A, Gallimore R, et al. C-reactive protein and bacterial infection in preterm infants. *Eur J Pediatr* 1990 Mar;149(6):424-427.
- Liuzzo G, Biasucci LM, Gallimore JR, et al. The prognostic value of C-reactive protein and serum amyloid A protein in severe unstable angina. *N Engl J Med* 1994;331:417-424.
- Kuller LH, Tracy RP, Shaten J, et al. Relation of c-reactive protein and coronary heart disease in the MRFIT nested case control study. *Am J Epidemiol* 1996;144:537-547.
- Ridker PM, Glynn RJ, Hennekens CH, et al. C-Reactive Protein Adds to the Predictive Value of Total and HDL Cholesterol in Determining Risk of First Myocardial Infarction. *Circulation* 1998;97:2007-2011.
- Ridker PM, Cushman M, Stampfer MJ, et al. Plasma Concentration of C-Reactive Protein and Risk of Developing Peripheral Vascular Disease. *Circulation* 1998;97:425-428.
- Ridker PM, Cushman M, Stampfer MJ, et al. Inflammation, Aspirin, and the Risk of Cardiovascular Disease in Apparently Healthy Men. *N Engl J Med* 1997;336(14):973-979.
- Danesh J, Wheeler JG, Hirschfield GM, et al. C-Reactive Protein and Other Circulating Markers of Inflammation in the Prediction of Coronary Heart Disease. *N Engl J Med* 2004;350(14):1387-1397.
- Ridker PM, Hennekens CH, Buring JE, et al. C-Reactive Protein and Other Markers of Inflammation in the Prediction of Cardiovascular Disease in Women. *N Engl J Med* 2000;342(12):836-843.
- Tracy RP, Lemaitre RN, Psaty BM, et al. Relationship of C-Reactive Protein to Risk of Cardiovascular Disease in the Elderly. *Arterioscler Thromb Vasc Biol* 1997;17:1121-1127.
- Järvisalo MJ, Harmoinen A, Hakonen M, et al. Elevated Serum C-Reactive Protein Levels and Early Arterial Changes in Healthy Children. *Arterioscler Thromb Vasc Biol*, (August) 2002;1323-1328.
- Almagor M, Keren A, Banai S. Increased C-Reactive Protein Level after Coronary Stent Implantation in Patients with Stable Coronary Artery Disease. *American Heart Journal* 2003;145 (2):248-253.
- Katritsis D, Korovesis S, Giazitzoglou E, et al. C-Reactive Protein Concentrations and Angiographic Characteristics of Coronary Lesions. *Clin Chem* 2001;47(5):882-886.
- Beattie MS, Shlipak MG, Liu H, et al. C-Reactive Protein and Ischemia in Users and Nonusers of  $\beta$ -Blockers and Statins. *Circulation* 2003;107:245-250.
- Plenge JK, Hernandez TL, Weil KM, et al. Simvastatin Lowers C-Reactive Protein Within 14 Days. An Effect Independent of Low-Density Lipoprotein Cholesterol Reduction. *Circulation* 2002;106:1447-1452.
- Lindahl B, Toss H, Siegbahn A, et al. Markers of Myocardial Damage and Inflammation in Relation to Long-Term Mortality in Unstable Coronary Artery Disease. *N Engl J Med* 2000;343(16):1139-1147.
- Pearson TA, Mensah GA, Alexander RW, et al. Markers of Inflammation and Cardiovascular Disease. Application to Clinical and Public Health Practice. A Statement for Healthcare Professionals From the Centers for Disease Control and Prevention and the American Heart Association. *Circulation* 2003;107:499-511.
- Price CP, Trull AK, Berry D, et al. Development and validation of a particle-enhanced turbidimetric immunoassay for C-reactive protein. *J Immunol Methods* 1987;99:205-211.
- Eda S, Kaufmann J, Roos W, et al. Development of a New Microparticle-Enhanced Turbidimetric Assay for C-reactive Protein with Superior Features in Analytical Sensitivity and Dynamic Range. *J Clin Lab Anal* 1998;12:137-144.
- Use of Anticoagulants in Diagnostic Laboratory Investigations. WHO Publication WHO/DIL/LAB/99.1 Rev. 2: Jan 2002.
- Baudner S, Bienvenu J, Blirup-Jensen S, et al. The certification of a matrix reference material for immunochemical measurement of 14 human serum proteins CRM470. Report EUR 15243 EN 1993;1-186.
- Glick MR, Ryder KW, Jackson SA. Graphical Comparisons of Interferences in Clinical Chemistry Instrumentation. *Clin Chem* 1986;32:470-475.
- Breuer J. Report on the Symposium "Drug effects in Clinical Chemistry Methods". *Eur J Clin Chem Clin Biochem* 1996;34:385-386.
- Sonntag O, Scholer A. Drug interference in clinical chemistry: recommendation of drugs and their concentrations to be used in drug interference studies. *Ann Clin Biochem* 2001;38:376-385.
- Bakker AJ, Mücke M. Gammopathy interference in clinical chemistry assays: mechanisms, detection and prevention. *Clin Chem Lab Med* 2007;45(9):1240-1243.
- Dati F, Schumann G, Thomas L, et al. Consensus of a group of professional societies and diagnostic companies on guidelines for interim reference ranges for 14 proteins in serum based on the standardization against the IFCC/BCR/CAP reference material (CRM 470). *Eur J Clin Chem Clin Biochem* 1996;34:517-520.
- Ridker PM. Clinical Application of C-Reactive Protein for Cardiovascular Disease Detection and Prevention. *Circulation* 2003;107:363-369.
- Schlebusch H, Liappis N, Kalina E, et al. High Sensitive CRP and Creatinine: Reference Intervals from Infancy to Childhood. *J Lab Med* 2002;26:341-346.
- Bablok W, Passing H, Bender R, et al. A general regression procedure for method transformation. Application of linear regression procedures for method comparison studies in clinical chemistry, Part III. *J Clin Chem Clin Biochem* 1988 Nov;26(11):783-790.

A point (period/stop) is always used in this Method Sheet as the decimal separator to mark the border between the integral and the fractional parts of a decimal numeral. Separators for thousands are not used.

### Symbols

Roche Diagnostics uses the following symbols and signs in addition to those listed in the ISO 15223-1 standard (for USA: see <https://usdiagnostics.roche.com> for definition of symbols used):

|                                  |                                       |
|----------------------------------|---------------------------------------|
| <input type="checkbox"/> CONTENT | Contents of kit                       |
| $\longrightarrow$                | Volume after reconstitution or mixing |
| <input type="checkbox"/> GTIN    | Global Trade Item Number              |

0004628918190c501V12.0

# CRPHS

## Cardiac C-Reactive Protein (Latex) High Sensitive

### FOR US CUSTOMERS ONLY: LIMITED WARRANTY

Roche Diagnostics warrants that this product will meet the specifications stated in the labeling when used in accordance with such labeling and will be free from defects in material and workmanship until the expiration date printed on the label. THIS LIMITED WARRANTY IS IN LIEU OF ANY OTHER WARRANTY, EXPRESS OR IMPLIED, INCLUDING ANY IMPLIED WARRANTY OF MERCHANTABILITY OR FITNESS FOR PARTICULAR PURPOSE. IN NO EVENT SHALL ROCHE DIAGNOSTICS BE LIABLE FOR INCIDENTAL, INDIRECT, SPECIAL OR CONSEQUENTIAL DAMAGES.

COBAS, COBAS C, PRECICONTROL and PRECINORM are trademarks of Roche.

All other product names and trademarks are the property of their respective owners.

Additions, deletions or changes are indicated by a change bar in the margin.

© 2019, Roche Diagnostics

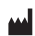

Roche Diagnostics GmbH, Sandhofer Strasse 116, D-68305 Mannheim  
[www.roche.com](http://www.roche.com)

Distribution in USA by:  
Roche Diagnostics, Indianapolis, IN  
US Customer Technical Support 1-800-428-2336



07559992500V4.0

# Elecsys Folate III



| REF         |  |  | SYSTEM                                                         |
|-------------|-----------------------------------------------------------------------------------|-----------------------------------------------------------------------------------|----------------------------------------------------------------|
| 07559992190 | 07559992500                                                                       | 100                                                                               | <b>cobas e 411</b><br><b>cobas e 601</b><br><b>cobas e 602</b> |

## English

### System information

For **cobas e 411** analyzer: test number 1520

For **cobas e 601** and **cobas e 602** analyzers: Application Code Number 721

### Intended use

Binding assay for the in vitro quantitative determination of folate in human serum and plasma.

The binding assay is intended for use on Elecsys and **cobas e** immunoassay analyzers.

### Summary

Folate belongs to the family of B-group vitamins composed of an aromatic pteridine ring linked through a methylene group to p-aminobenzoic acid and a glutamate residue. Folate (folic acid) is vital for normal cellular functions and plays an essential role in nucleic acid synthesis, methionine regeneration, shuttling and redox reactions of one-carbon units required for normal metabolism and regulation.<sup>1,2</sup>

The folate metabolism can be exemplified as a cycle, where folate facilitates the transfer of one-carbon units from one molecule to another required in various biochemical reactions: for example, tetrahydrofolate (THF) accepts a single carbon unit from serine, which is reduced in a number of steps to 5-methyltetrahydrofolate (5-MTHF). 5-MTHF gives its methyl group to homocysteine, which is - with involvement of methionine synthase and vitamin B12 - enzymatically converted to methionine. The resulting THF starts again the cycle of methyl group synthesis. From methionine, the methyl groups are transferred to S-adenosylmethionine (SAM).<sup>3</sup> SAM serves as a methyl group donor in several methylation reactions, like DNA, RNA and protein methylation.<sup>1</sup>

The methionine cycle is highly sensitive to folate deficiency: with a low folate status, the ability of the cell to re-methylate homocysteine is impaired and this results in increased homocysteine concentrations in plasma.<sup>2</sup>

Folate also plays an essential role in the synthesis of purine and pyrimidine precursors of nucleic acids. Altered distribution of methyl groups and impaired DNA synthesis play an essential role in the development of cancers. Abnormal folate status has also been linked with the development of diseases like cardiovascular diseases, neural tube defects, cleft lip and palate, late pregnancy complications, neurodegenerative and psychiatric disorders.<sup>1,2</sup>

Folate belongs to the group of essential vitamins, i.e. it cannot be synthesized by the human organism and therefore must be absorbed from diet. Primary sources of folates are green and leafy vegetables, sprouts, fruits, brewer's yeast and liver.<sup>1,2</sup>

Folate deficiency can be caused by decreased nutritional intake, poor absorption of ingested folate in the intestine or increased demand of folate, for example during physical activity or pregnancy. Deficiency of folate can also be a result of liver diseases or impaired folate metabolism due to genetic defects or drug interactions.<sup>2</sup>

A clinical manifestation of both folate and vitamin B12 deficiency is the so called megaloblastic (macrocytic) anemia: due to the affected DNA synthesis and cell maturation, especially involving the cells of erythropoiesis, the total count of erythrocytes is significantly reduced. The hemoglobin synthesis capacity however is normal, which leads to abnormally large erythrocyte precursors ("macrocytes" or "megaloblasts"), which have an elevated hemoglobin content ("hyperchromic anemia").<sup>3,4</sup>

Because vitamin B12 and folate are closely interrelated in the cellular one-carbon unit metabolism, and also hematologic and clinical consequences of the two vitamin deficiency states might be similar, it is advisable to determine both parameters simultaneously in patients with the relevant symptoms of vitamin deficiency.<sup>3,4</sup>

### Test principle

Competition principle. Total duration of assay: 27 minutes.

- 1st incubation: By incubating 25 µL of sample with the folate pretreatment reagents 1 and 2, bound folate is released from endogenous folate binding proteins.
- 2nd incubation: By incubating the pretreated sample with the ruthenium labeled folate binding protein, a folate complex is formed, the amount of which is dependent upon the analyte concentration in the sample.
- 3rd incubation: After addition of streptavidin-coated microparticles and folate labeled with biotin, the unbound sites of the ruthenium labeled folate binding protein become occupied, with formation of a ruthenium labeled folate binding protein-folate biotin complex. The entire complex becomes bound to the solid phase via interaction of biotin and streptavidin.
- The reaction mixture is aspirated into the measuring cell where the microparticles are magnetically captured onto the surface of the electrode. Unbound substances are then removed with ProCell/ProCell M. Application of a voltage to the electrode then induces chemiluminescent emission which is measured by a photomultiplier.
- Results are determined via a calibration curve which is instrument-specifically generated by 2-point calibration and a master curve provided via the reagent barcode or e-barcode.

### Reagents - working solutions

The reagent rackpack (M, R1, R2) and the pretreatment reagents (PT1, PT2) are labeled as Fol III.

- PT1 Pretreatment reagent 1 (white cap), 1 bottle, 4 mL:  
Sodium 2-mercaptoethanesulfonate (MESNA) 40 g/L, pH 5.5.
- PT2 Pretreatment reagent 2 (gray cap), 1 bottle, 5 mL:  
Sodium hydroxide 25 g/L.
- M Streptavidin-coated microparticles (transparent cap), 1 bottle, 6.5 mL:  
Streptavidin-coated microparticles 0.72 mg/mL; preservative.
- R1 Folate binding protein-Ru(bpy)<sub>3</sub><sup>2+</sup> (gray cap), 1 bottle, 9 mL:  
Ruthenium labeled folate binding protein 75 µg/L; human serum albumin (stabilizer); borate/phosphate/citrate buffer 70 mmol/L, pH 5.5; preservative.
- R2 Folate-biotin (black cap), 1 bottle, 8 mL:  
Biotinylated folate 17 µg/L; biotin 120 µg/L; human serum albumin (stabilizer); borate buffer 100 mmol/L, pH 9.0; preservative.

### Precautions and warnings

For in vitro diagnostic use.

Exercise the normal precautions required for handling all laboratory reagents.

Disposal of all waste material should be in accordance with local guidelines. Safety data sheet available for professional user on request.

This kit contains components classified as follows in accordance with the Regulation (EC) No. 1272/2008:

2-methyl-2H-isothiazol-3-one hydrochloride

EUH 208 May produce an allergic reaction.

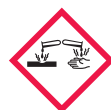

Danger

H290 May be corrosive to metals.

07559992500V4.0

# Elecsys Folate III



H314 Causes severe skin burns and eye damage.

**Prevention:**

P280 Wear protective gloves/ protective clothing/ eye protection/ face protection.

**Response:**

P301 + P330 IF SWALLOWED: Rinse mouth. Do NOT induce vomiting.  
+ P331

P303 + P361 IF ON SKIN (or hair): Take off immediately all contaminated clothing. Rinse skin with water.  
+ P353

P304 + P340 IF INHALED: Remove person to fresh air and keep comfortable for breathing.  
+ P310 Immediately call a POISON CENTER/ doctor.

P305 + P351 IF IN EYES: Rinse cautiously with water for several minutes. Remove contact lenses, if present and easy to do.  
+ P338 Continue rinsing. Immediately call a POISON CENTER/ doctor.  
+ P310

P390 Absorb spillage to prevent material damage.

Product safety labeling follows EU GHS guidance.

Contact phone: all countries: +49-621-7590

All human material should be considered potentially infectious. All products derived from human blood are prepared exclusively from the blood of donors tested individually and shown to be free from HBsAg and antibodies to HCV and HIV. The testing methods used assays approved by the FDA or cleared in compliance with the European Directive 98/79/EC, Annex II, List A.

However, as no testing method can rule out the potential risk of infection with absolute certainty, the material should be handled with the same level of care as a patient specimen. In the event of exposure, the directives of the responsible health authorities should be followed.<sup>5,6</sup>

Avoid foam formation in all reagents and sample types (specimens, calibrators and controls).

**Reagent handling**

The reagents in the kit have been assembled into a ready-for-use unit that cannot be separated.

All information required for correct operation is read in from the respective reagent barcodes.

**Storage and stability**

Store at 2-8 °C.

Do not freeze.

Store the Elecsys reagent kit **upright** in order to ensure complete availability of the microparticles during automatic mixing prior to use.

|                         |                                                                                                                                                                                          |
|-------------------------|------------------------------------------------------------------------------------------------------------------------------------------------------------------------------------------|
| Stability:              |                                                                                                                                                                                          |
| unopened at 2-8 °C      | up to the stated expiration date                                                                                                                                                         |
| after opening at 2-8 °C | 56 days (8 weeks)                                                                                                                                                                        |
| on the analyzers        | 14 days (2 weeks) onboard or 28 days (4 weeks) when stored alternatively in the refrigerator and on the analyzer, with the total time onboard on the analyzer not exceeding 10 x 8 hours |

**Specimen collection and preparation**

Only the specimens listed below were tested and found acceptable.

Serum collected using standard sampling tubes or tubes containing separating gel.

Li-heparin plasma. Li-heparin plasma tubes containing separating gel can be used.

Criterion: Method comparison serum versus Li-heparin plasma, slope 0.9-1.1 + intercept within  $\pm 2x$  Limit of Blank (LoB), coefficient of correlation  $\geq 0.95$ .

Serum: Stable for 2 hours at 15-25 °C, 48 hours at 2-8 °C, 28 days at -20 °C ( $\pm 5$  °C). Freeze only once. Protect from light. Store the samples at 2-8 °C if they cannot be measured immediately.

Li-heparin plasma: Stable for 2 hours at 15-25 °C, 48 hours at 2-8 °C, 28 days at -20 °C ( $\pm 5$  °C). Freeze only once. Protect from light. Store the samples at 2-8 °C if they cannot be measured immediately.

The sample types listed were tested with a selection of sample collection tubes that were commercially available at the time of testing, i.e. not all available tubes of all manufacturers were tested. Sample collection systems from various manufacturers may contain differing materials which could affect the test results in some cases. When processing samples in primary tubes (sample collection systems), follow the instructions of the tube manufacturer.

Samples should not subsequently be altered with additives (biocides, anti-oxidants or substances possibly changing the pH of the sample) in order to avoid erroneous folate recovery.

Centrifuge samples containing precipitates before performing the assay.

Do not use heat-inactivated samples.

Ensure the samples, calibrators and controls are at 20-25 °C prior to measurement.

Due to possible evaporation effects, samples, calibrators and controls on the analyzers should be analyzed/measured within 2 hours.

Note: Hemolysis may significantly increase folate values due to high concentrations of folate in red blood cells. Therefore, hemolyzed samples are not suitable for use in this assay. Samples for folate determinations should be collected from fasting persons.

**Materials provided**

See "Reagents – working solutions" section for reagents.

**Materials required (but not provided)**

- [REF] 07560001190, Folate III CalSet, for 4 x 1.0 mL
- [REF] 05618860190, PreciControl Varia, for 4 x 3.0 mL
- [REF] 11732277122, Diluent Universal, 2 x 16 mL sample diluent or [REF] 03183971122, Diluent Universal, 2 x 36 mL sample diluent
- General laboratory equipment

▪ **cobas e** analyzer

Additional materials for the **cobas e** 411 analyzer:

- [REF] 11662988122, ProCell, 6 x 380 mL system buffer
- [REF] 11662970122, CleanCell, 6 x 380 mL measuring cell cleaning solution
- [REF] 11930346122, Elecsys SysWash, 1 x 500 mL washwater additive
- [REF] 11933159001, Adapter for SysClean
- [REF] 11706802001, AssayCup, 60 x 60 reaction cups
- [REF] 11706799001, AssayTip, 30 x 120 pipette tips
- [REF] 11800507001, Clean-Liner

Additional materials for **cobas e** 601 and **cobas e** 602 analyzers:

- [REF] 04880340190, ProCell M, 2 x 2 L system buffer
- [REF] 04880293190, CleanCell M, 2 x 2 L measuring cell cleaning solution
- [REF] 03023141001, PC/CC-Cups, 12 cups to prewarm ProCell M and CleanCell M before use
- [REF] 03005712190, ProbeWash M, 12 x 70 mL cleaning solution for run finalization and rinsing during reagent change
- [REF] 03004899190, PreClean M, 5 x 600 mL detection cleaning solution
- [REF] 12102137001, AssayTip/AssayCup, 48 magazines x 84 reaction cups or pipette tips, waste bags
- [REF] 03023150001, WasteLiner, waste bags
- [REF] 03027651001, SysClean Adapter M

Additional materials for all analyzers:





0755992500V4.0

# Elecsys Folate III



| Sex  | Age<br>years | N    | Median |        | 2.5 <sup>th</sup> -97.5 <sup>th</sup> percentile |            |
|------|--------------|------|--------|--------|--------------------------------------------------|------------|
|      |              |      | ng/mL  | nmol/L | ng/mL                                            | nmol/L     |
| Both | ≥ 60         | 4671 | 16.6   | 37.6   | 5.6-45.8                                         | 12.7-103.8 |

These values were obtained in the USA during the National Health and Nutrition Examination Survey (NHANES), 1999-2004.

The values shown below were performed on samples from an apparently healthy population, using the Elecsys Folate III assay.

The calculation is based on 404 sera (177 men, 227 women). The age range was between 20 and 65 years. Pregnant or lactating women were excluded. The reference population was selected according to normal homocysteine values.

| N   | Median |        | 2.5 <sup>th</sup> -97.5 <sup>th</sup> percentile |           |
|-----|--------|--------|--------------------------------------------------|-----------|
|     | ng/mL  | nmol/L | ng/mL                                            | nmol/L    |
| 404 | 8.94   | 20.3   | 3.89-26.8                                        | 8.83-60.8 |

Please note: These values should only be used as a guideline.

It should be taken into consideration that differences in the expected values may exist with respect to population and dietary status.

Each laboratory should investigate the transferability of the expected values to its own patient population and if necessary determine its own reference ranges.

### Folate deficient sample values

25 samples considered to be deficient<sup>a)</sup> in serum folate concentration were assessed using the Elecsys Folate III assay. All samples were found to be below the 2.5<sup>th</sup> percentile as given in the table above.

a) Folate deficiency was assessed by measurement of serum folate by two commercially available folate assays.

### Specific performance data

Representative performance data on the analyzers are given below. Results obtained in individual laboratories may differ.

### Precision

Precision was determined using Elecsys reagents, pooled human sera and controls in a protocol (EP5-A2) of the CLSI (Clinical and Laboratory Standards Institute); 2 runs per day in duplicate each for 21 days (n = 84). The following results were obtained:

| cobas e 411 analyzer |      |               |     |                        |      |
|----------------------|------|---------------|-----|------------------------|------|
| Sample               | Mean | Repeatability |     | Intermediate precision |      |
|                      |      | SD            | CV  | SD                     | CV   |
| Human serum 1        | 1.88 | 0.150         | 8.0 | 0.205                  | 10.9 |
| Human serum 2        | 3.92 | 0.200         | 5.1 | 0.318                  | 8.1  |
| Human serum 3        | 11.9 | 0.346         | 2.9 | 0.571                  | 4.8  |
| Human serum 4        | 13.4 | 0.301         | 2.2 | 0.574                  | 4.3  |
| Human serum 5        | 17.8 | 0.440         | 2.5 | 0.666                  | 3.7  |
| PreciControl Varia1  | 3.24 | 0.215         | 6.6 | 0.309                  | 9.5  |
| PreciControl Varia2  | 11.6 | 0.314         | 2.7 | 0.566                  | 4.9  |

| cobas e 411 analyzer |      |               |     |                        |      |
|----------------------|------|---------------|-----|------------------------|------|
| Sample               | Mean | Repeatability |     | Intermediate precision |      |
|                      |      | SD            | CV  | SD                     | CV   |
| Human serum 1        | 4.27 | 0.341         | 8.0 | 0.465                  | 10.9 |
| Human serum 2        | 8.90 | 0.454         | 5.1 | 0.722                  | 8.1  |
| Human serum 3        | 27.0 | 0.785         | 2.9 | 1.30                   | 4.8  |
| Human serum 4        | 30.4 | 0.683         | 2.2 | 1.30                   | 4.3  |

| cobas e 411 analyzer |      |               |     |                        |     |
|----------------------|------|---------------|-----|------------------------|-----|
| Sample               | Mean | Repeatability |     | Intermediate precision |     |
|                      |      | SD            | CV  | SD                     | CV  |
| Human serum 5        | 40.4 | 0.999         | 2.5 | 1.51                   | 3.7 |
| PreciControl Varia1  | 7.35 | 0.488         | 6.6 | 0.701                  | 9.5 |
| PreciControl Varia2  | 26.3 | 0.713         | 2.7 | 1.28                   | 4.9 |

| cobas e 601 and cobas e 602 analyzers |      |               |      |                        |      |
|---------------------------------------|------|---------------|------|------------------------|------|
| Sample                                | Mean | Repeatability |      | Intermediate precision |      |
|                                       |      | SD            | CV   | SD                     | CV   |
| Human serum 1                         | 1.66 | 0.255         | 15.4 | 0.268                  | 16.1 |
| Human serum 2                         | 4.10 | 0.219         | 5.4  | 0.303                  | 7.4  |
| Human serum 3                         | 11.1 | 0.449         | 4.1  | 0.503                  | 4.6  |
| Human serum 4                         | 12.2 | 0.454         | 3.7  | 0.467                  | 3.8  |
| Human serum 5                         | 16.4 | 0.502         | 3.1  | 0.625                  | 3.8  |
| PreciControl Varia1                   | 2.34 | 0.189         | 8.1  | 0.228                  | 9.8  |
| PreciControl Varia2                   | 10.1 | 0.443         | 4.4  | 0.489                  | 4.9  |

| cobas e 601 and cobas e 602 analyzers |      |               |      |                        |      |
|---------------------------------------|------|---------------|------|------------------------|------|
| Sample                                | Mean | Repeatability |      | Intermediate precision |      |
|                                       |      | SD            | CV   | SD                     | CV   |
| Human serum 1                         | 3.77 | 0.579         | 15.4 | 0.608                  | 16.1 |
| Human serum 2                         | 9.31 | 0.497         | 5.4  | 0.688                  | 7.4  |
| Human serum 3                         | 25.2 | 1.02          | 4.1  | 1.14                   | 4.6  |
| Human serum 4                         | 27.7 | 1.03          | 3.7  | 1.06                   | 3.8  |
| Human serum 5                         | 37.2 | 1.14          | 3.1  | 1.42                   | 3.8  |
| PreciControl Varia1                   | 5.31 | 0.429         | 8.1  | 0.518                  | 9.8  |
| PreciControl Varia2                   | 22.9 | 1.01          | 4.4  | 1.11                   | 4.9  |

### Method comparison

a) A comparison of the Elecsys Folate III assay (traceable to WHO IS 03/178; y) and the Elecsys Folate III assay prior to standardization against WHO IS 03/178 (x) using clinical samples gave the following correlations (ng/mL):

Number of samples measured: 113

Passing/Bablok<sup>16</sup> Linear regression  
 $y = 1.14x - 1.97$   $y = 1.11x - 1.77$   
 $r = 0.939$   $r = 0.994$

The sample concentrations were between 2.1 and 18 ng/mL (4.8 and 41 nmol/L).

b) A comparison of the Elecsys Folate III assay (y) with a commercially available method (x) using clinical samples gave the following correlations (ng/mL):

Number of samples measured: 106

Passing/Bablok<sup>16</sup> Linear regression  
 $y = 0.980x - 0.095$   $y = 1.09x - 0.659$   
 $r = 0.924$   $r = 0.984$

The sample concentrations were between 1.9 and 17 ng/mL (4.3 and 39 nmol/L).

07559992500V4.0

# Elecsys Folate III



c) A comparison of the Elecsys Folate III assay on the **cobas e 601** analyzer (y) with the Elecsys Folate III assay on the **cobas e 411** analyzer (x) using clinical samples gave the following correlations (ng/mL):  
Number of samples measured: 105

Passing/Bablok<sup>16</sup>                      Linear regression  
 $y = 1.05x - 0.303$                        $y = 0.981x + 0.143$   
 $T = 0.868$                                    $r = 0.982$

The sample concentrations were between 1.6 and 19 ng/mL (3.6 and 43 nmol/L).

## Analytical specificity

The following cross-reactivities were found, tested with folate concentrations of approximately 3.5 ng/mL, 10 ng/mL and 19 ng/mL.

| Cross-reactant | Concentration tested<br>ng/mL | Cross-reactivity<br>% |
|----------------|-------------------------------|-----------------------|
| Amethopterin   | 750                           | 2.5                   |
| Aminopterin    | 750                           | 4.4                   |
| Folinic acid   | 750                           | 0.7                   |

## References

- Nazki FH, Sameer AS, Ganaie BA. Folate: Metabolism, genes, polymorphisms and the associated diseases. *Gene* 2014;533(1):11-20.
- Scaglione F, Panzavolta G. Folate, folic acid and 5-methyltetrahydrofolate are not the same thing. *Xenobiotica* 2014;44(5):480-488.
- Reynolds EH. The neurology of folic acid deficiency. *Handb Clin Neurol* 2014;120:927-43.
- Wick M, Pinggera W, Lehmann P. *Clinical Aspects and Laboratory. Iron metabolism, Anemias.* Springer Verlag, Wien, New York, 6th edition 2011:41-42.
- Occupational Safety and Health Standards: Bloodborne pathogens. (29 CFR Part 1910.1030). Fed. Register.
- Directive 2000/54/EC of the European Parliament and Council of 18 September 2000 on the protection of workers from risks related to exposure to biological agents at work.
- Wu AHB. *Tietz clinical guide to laboratory tests*, 4th ed. St. Louis, Saunders/Elsevier 2006:608-609, 916-917.
- Paricaud K, Moulis G, Combis MS, et al. Causes of proteinuria above 100 g/L. *Eur J Intern Med* 2014;25:e123.
- Filippatos TD, Liamis G, Christopoulou F, et al. Ten common pitfalls in the evaluation of patients with hyponatremia. *Eur J Intern Med* 2016;29:22-25.
- Mailankody S, Landgren O. Monoclonal gammopathy of undetermined significance and Waldenström's macroglobulinemia. *Best Pract Res Clin Haematol* 2016;29:187-193.
- Morel P, Duhamel A, Gobbi P, et al. International prognostic scoring system for Waldenström macroglobulinemia. *Blood* 2009;113:4163-4170.
- Rajkumar SV. Multiple Myeloma. *Curr Probl Cancer* 2009;33:7-64.
- Gertz MA. Immunoglobulin light chain amyloidosis: 2016 update on diagnosis, prognosis, and treatment. *Am J Hematol* 2016;91:947-956.
- Wu AHB. *Tietz clinical guide to laboratory tests*, 4th ed. St. Louis, Saunders/Elsevier 2006: 916-917, 925.
- Pfeiffer CM, Johnson CL, Jain RB, et al. Trends in blood folate and vitamin B-12 concentrations in the United States, 1988-2004. *Am J Clin Nutr* 2007;86:718-727.
- Bablok W, Passing H, Bender R, et al. A general regression procedure for method transformation. Application of linear regression procedures for method comparison studies in clinical chemistry, Part III. *J Clin Chem Clin Biochem* 1988 Nov;26(11):783-790.

For further information, please refer to the appropriate operator's manual for the analyzer concerned, the respective application sheets, the product information and the Method Sheets of all necessary components (if available in your country).

A point (period/stop) is always used in this Method Sheet as the decimal separator to mark the border between the integral and the fractional parts of a decimal numeral. Separators for thousands are not used.

## Symbols

Roche Diagnostics uses the following symbols and signs in addition to those listed in the ISO 15223-1 standard (for USA: see [dialog.roche.com](http://dialog.roche.com) for definition of symbols used):

|                                                                                   |                                                     |
|-----------------------------------------------------------------------------------|-----------------------------------------------------|
|  | Contents of kit                                     |
|  | Analyzers/Instruments on which reagents can be used |
|  | Reagent                                             |
|  | Calibrator                                          |
|  | Volume after reconstitution or mixing               |
|  | Global Trade Item Number                            |

COBAS, COBAS E, ELECSYS and PRECICONTROL are trademarks of Roche. INTRALIPID is a trademark of Fresenius Kabi AB.

All other product names and trademarks are the property of their respective owners.

Additions, deletions or changes are indicated by a change bar in the margin.

© 2019, Roche Diagnostics

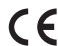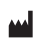

Roche Diagnostics GmbH, Sandhofer Strasse 116, D-68305 Mannheim  
[www.roche.com](http://www.roche.com)

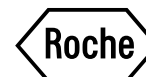



**Annex 2: Nutrition direct and indirect interventions/indicators assessment questionnaire**  
**Nutrition direct and indirect Interventions Questionnaire**

**Module 1: Household identifier, characteristics and socio-demographic status**

| Household identifier and characteristics |                                                                                                                                     |                                                                                                                                                                 |                |             |
|------------------------------------------|-------------------------------------------------------------------------------------------------------------------------------------|-----------------------------------------------------------------------------------------------------------------------------------------------------------------|----------------|-------------|
| 101                                      | Region Code                                                                                                                         | _ _ _                                                                                                                                                           |                |             |
| 102                                      | Woreda Code                                                                                                                         | _ _ _                                                                                                                                                           |                |             |
| 103                                      | Kebele Code                                                                                                                         | _ _ _                                                                                                                                                           |                |             |
| 104                                      | Gote Code                                                                                                                           | _ _ _                                                                                                                                                           |                |             |
| 105                                      | Household Code                                                                                                                      | _ _ _                                                                                                                                                           |                |             |
|                                          |                                                                                                                                     | GPS Coordinates                                                                                                                                                 |                |             |
| 106                                      | Unique Household Code                                                                                                               | _ _ _ _                                                                                                                                                         | _ _ _          | _ _ _       |
|                                          |                                                                                                                                     | _ _ _                                                                                                                                                           | _ _ _          | _ _ _       |
|                                          |                                                                                                                                     | Region Code                                                                                                                                                     | Woreda Code    | Kebele Code |
|                                          |                                                                                                                                     | EA Code                                                                                                                                                         | Household Code |             |
| 107                                      | Residence                                                                                                                           | 1 = Urban<br>2 = Rural                                                                                                                                          |                |             |
| 108                                      | Do you own this house?                                                                                                              | 1 = Yes<br>0 = No                                                                                                                                               |                |             |
| 109                                      | What is the main material of the walls?<br><b>Observe</b>                                                                           | 1 = No walls<br>2 = Natural materials (cane, wood, mud, straw)<br>3 = Stone with mud<br>4 = Stone/bricks with cement<br>99 = Other                              |                |             |
| 110                                      | What is the main floor material?<br><b>Observe</b>                                                                                  | 1 = Natural floor (earth/sand/dung)<br>2 = Rudimentary floor (wood/palm/bamboo)<br>3 = Finished floor (polished wood/ vinyl/ tiles/cement/carpet)<br>99 = Other |                |             |
| 111                                      | What is the main material of the roof?<br><b>Observe</b>                                                                            | 1 = Thatch/grass or leaves<br>2 = Iron sheets or tiles<br>99 = Other                                                                                            |                |             |
| 112                                      | What type of fuel does your household mostly use for cooking?<br><b>Do not read list</b>                                            | 1 = Dung<br>2 = Firewood/straw<br>3 = Charcoal<br>4 = Kerosene<br>5 = Gas (methane/biogas)<br>6 = Electricity<br>99 = Other                                     |                |             |
| 113                                      | Is the house connected to electricity?                                                                                              | 1 = Yes<br>0 = No                                                                                                                                               |                |             |
| 114                                      | In total, how many of the following items are owned by residents of this household?<br><b>Add the household total for each item</b> | A kerosene lamp/pressure lamp                                                                                                                                   |                |             |
| 115                                      |                                                                                                                                     | Mobile phone                                                                                                                                                    |                |             |
| 116                                      |                                                                                                                                     | Cart                                                                                                                                                            |                |             |
| 117                                      |                                                                                                                                     | Bicycle                                                                                                                                                         |                |             |
| 118                                      |                                                                                                                                     | Motorcycle                                                                                                                                                      |                |             |
| 119                                      |                                                                                                                                     | Radio                                                                                                                                                           |                |             |
| 120                                      | Television                                                                                                                          |                                                                                                                                                                 |                |             |

|                                                |                                                                                                                                            |                                                                                                                                                               |       |
|------------------------------------------------|--------------------------------------------------------------------------------------------------------------------------------------------|---------------------------------------------------------------------------------------------------------------------------------------------------------------|-------|
| 121                                            |                                                                                                                                            | Car/tractor/Bajaj                                                                                                                                             | _     |
| 122                                            | Does this household own any livestock, herds, other farm animals, or poultry?                                                              | 1 = Yes<br>0 = No ( <b>Go to→131</b> )                                                                                                                        |       |
| 123                                            | In total, how many of the following animals are owned by residents of this household?<br><b>Add the household total for each item</b>      | Milk cows, oxen or bulls?                                                                                                                                     | _     |
| 124                                            |                                                                                                                                            | Other cattle?                                                                                                                                                 | _     |
| 125                                            |                                                                                                                                            | Horses, donkeys, or mules?                                                                                                                                    | _     |
| 126                                            |                                                                                                                                            | Camels                                                                                                                                                        | _     |
| 127                                            |                                                                                                                                            | Goats?                                                                                                                                                        | _     |
| 128                                            |                                                                                                                                            | Sheep?                                                                                                                                                        | _     |
| 129                                            |                                                                                                                                            | Chickens or other poultry?                                                                                                                                    | _     |
| 130                                            |                                                                                                                                            | Beehives?                                                                                                                                                     | _     |
| 131                                            | Does any member of this household own any agricultural land?                                                                               | 1 = Yes<br>0 = No                                                                                                                                             | _     |
| 132                                            | How often does anyone smoke inside your house?<br><br><i>Would you say daily, weekly, monthly, less often than once a month, or never?</i> | 1 = Daily<br>2 = Weekly<br>3 = Monthly<br>4 = Less once monthly<br>5 = Never                                                                                  | _     |
| <b>Household head socio-demographic status</b> |                                                                                                                                            |                                                                                                                                                               |       |
| 133                                            | Age in years                                                                                                                               |                                                                                                                                                               | _ _ _ |
| 134                                            | Marital status                                                                                                                             | 1. Single<br>2. Married<br>3. Divorced<br>4. Separated<br>5. Widowed                                                                                          | _     |
| 135                                            | What is the highest level of school the head of the household completed?                                                                   | 1. None<br>2. Primary<br>3. Secondary<br>4. Technical/vocational certificate<br>5. Higher / university/ college<br>98. Don't know<br>99. Other (specify)_____ | _ _ _ |
| 136                                            | What is the religion of the head of the HH?                                                                                                | 1. Orthodox<br>2. Protestant<br>3. Catholic/ other Christian<br>4. Muslim<br>5. No religion<br>98. Don't know<br>99. Other religion (specify)_____            | _ _ _ |
| 137                                            | Ethnicity                                                                                                                                  | Specify                                                                                                                                                       |       |

**Module 2: Child health**

Now I would like to ask some questions about the health of your children born in the last 5 years. We will talk about each separately, starting with the youngest.

|     |                                                                                 |                                                                                                                                                         |       |
|-----|---------------------------------------------------------------------------------|---------------------------------------------------------------------------------------------------------------------------------------------------------|-------|
| 201 | Child's code                                                                    |                                                                                                                                                         | _ _ _ |
| 202 | Mother's name                                                                   | Mother's given name                                                                                                                                     |       |
| 203 | Mother's age                                                                    |                                                                                                                                                         |       |
| 204 | Mother's education level                                                        | 1=None<br>2=Primary<br>3=Secondary<br>4=Technical/vocational certificate<br>5=Higher / university/ college<br>98=Don't know<br>99. Other (specify)_____ |       |
| 205 | Mother's marital status                                                         | 1=Single<br>2 =Married<br>3=Divorced<br>4 =Separated<br>5=Widowed                                                                                       |       |
| 206 | Mother's religion                                                               | 1=Orthodox<br>2=Protestant<br>3=Catholic/ other Christian<br>4=Muslim<br>5=No religion<br>98=Don't know<br>99=Other religion (specify)_____             |       |
| 207 | Mother's ethnicity                                                              | Specify                                                                                                                                                 |       |
| 208 | Child's name                                                                    | Child's given name                                                                                                                                      |       |
| 209 | Child (NAME) sex                                                                | 1 = Boy<br>2 = Girl                                                                                                                                     | _     |
| 210 | Child (NAME) age?                                                               | Age in months or age at the time of the child's death                                                                                                   | _ _ _ |
| 211 | In the last six months, was (NAME) given any vitamin A supplement?              | 1 = Yes<br>0 = No<br>98 = Don't know                                                                                                                    | _ _ _ |
| 212 | When was the child (NAME) given the vitamin A supplement?                       | Specify                                                                                                                                                 |       |
| 213 | In the last 12 months, was (NAME) given any iron tablet or syrup or supplement? | 1 = Yes<br>0 = No<br>98 = Don't know                                                                                                                    | _ _ _ |
| 214 | In the last 6 months, was (name) given any medicine for intestinal worms?       | 1 = Yes<br>0 = No<br>98 = Don't know                                                                                                                    | _ _ _ |
| 215 | In the last 3 months, has any healthcare provider measured?                     | 1 = Yes, 0 = No, 98 = Don't know                                                                                                                        |       |
|     |                                                                                 | Weight                                                                                                                                                  | _ _ _ |
|     |                                                                                 | Height/length                                                                                                                                           | _ _ _ |
|     |                                                                                 | MUAC                                                                                                                                                    | _ _ _ |
| 216 | Has (name) had diarrhea in the last 2 weeks?                                    | 1 = Yes<br>0 = No ( <b>Go to 224</b> )                                                                                                                  | _ _ _ |

|     |                                                                                                                                                                                                                      |                                                                                                                                                                                                                                                                                                                                                                                                                                                                                                                                                                                                          |       |
|-----|----------------------------------------------------------------------------------------------------------------------------------------------------------------------------------------------------------------------|----------------------------------------------------------------------------------------------------------------------------------------------------------------------------------------------------------------------------------------------------------------------------------------------------------------------------------------------------------------------------------------------------------------------------------------------------------------------------------------------------------------------------------------------------------------------------------------------------------|-------|
|     |                                                                                                                                                                                                                      | 98 = Don't know                                                                                                                                                                                                                                                                                                                                                                                                                                                                                                                                                                                          |       |
| 217 | Now I would like to know how much was the child given to drink during diarrhea, including breast milk. Was the child given less than usual to drink, about the same amount, or more than usual to drink?             | 1 = Much less<br>2 = Somewhat less<br>3 = About the same<br>4 = More<br>5 = Nothing to drink<br>98 = Don't know                                                                                                                                                                                                                                                                                                                                                                                                                                                                                          | _     |
| 218 | When the child had diarrhea, was he/she given less than usual to eat, about the same amount, more than usual, or nothing to eat?                                                                                     | 1 = Much less<br>2 = Somewhat less<br>3 = About the same<br>4 = More<br>5 = Nothing to drink<br>98 = Don't know                                                                                                                                                                                                                                                                                                                                                                                                                                                                                          | _     |
| 219 | Did you seek advice or treatment for the diarrhea from any source?                                                                                                                                                   | 1 = Yes<br>0 = No ( <b>Go to 221</b> )                                                                                                                                                                                                                                                                                                                                                                                                                                                                                                                                                                   | _     |
| 220 | Where did you seek advice or treatment? Anywhere else?<br><br><i>Probe to identify the type of source. If unable to determine if public, private, or NGO sector, record '21' and write the name of the place(s).</i> | 1= Government hospital<br>2= Government health center<br>3= Government health post<br>4 = Mobile clinic<br>5 = Community health worker/fieldworker<br>6 = Other public sector (specify)<br>7 = Private hospital<br>8 = Private clinic<br>9 = Pharmacy<br>10 = Private doctor<br>11 = Mobile clinic<br>12 = Community health worker/fieldworker<br>13 = Other private medical sector (specify)<br>14 = NGO hospital<br>15 = NGO clinic<br>16 = Other NGO medical sector (specify)<br>17 = Shop<br>18 = Traditional practitioner<br>19 = Market<br>20 = Itinerant drug seller<br>99 = Other (specify)_____ | _ _ _ |
|     | Was (name) given any of the following at any time since (name) started having diarrhea:                                                                                                                              | 1 = Yes, 0 = No, 98 = Don't know                                                                                                                                                                                                                                                                                                                                                                                                                                                                                                                                                                         |       |
| 221 |                                                                                                                                                                                                                      | Fluid from ORS packet                                                                                                                                                                                                                                                                                                                                                                                                                                                                                                                                                                                    | _ _ _ |
| 222 |                                                                                                                                                                                                                      | Zinc                                                                                                                                                                                                                                                                                                                                                                                                                                                                                                                                                                                                     | _ _ _ |
| 223 |                                                                                                                                                                                                                      | Homemade fluid                                                                                                                                                                                                                                                                                                                                                                                                                                                                                                                                                                                           | _ _ _ |
| 224 | Has (name) been ill with a fever at any time in the last 2 weeks?                                                                                                                                                    | 1 = Yes<br>0 = No ( <b>Go to 226</b> )<br>98 = Don't know                                                                                                                                                                                                                                                                                                                                                                                                                                                                                                                                                | _ _ _ |
| 225 | Where did you seek advice or treatment for                                                                                                                                                                           | 1= Government hospital                                                                                                                                                                                                                                                                                                                                                                                                                                                                                                                                                                                   |       |

|    |                                                         |                                                       |                                     |
|----|---------------------------------------------------------|-------------------------------------------------------|-------------------------------------|
| 1  | fever?                                                  | 2= Government health center                           |                                     |
| 2  | Anywhere else?                                          | 3= Government health post                             |                                     |
| 3  |                                                         | 4 = Mobile clinic                                     |                                     |
| 4  |                                                         | 5 = Community health worker/                          |                                     |
| 5  | <i>Probe to identify the type of source.</i>            | fieldworker                                           |                                     |
| 6  | <i>If unable to determine if public, private, or</i>    | 6 = Other public sector (specify)                     |                                     |
| 7  | <i>NGO sector, record '21' and write the name</i>       | 7 = Private hospital                                  |                                     |
| 8  | <i>Of the place(s).</i>                                 | 8 = Private clinic                                    | _ _ _                               |
| 9  |                                                         | 9 = Pharmacy                                          |                                     |
| 10 |                                                         | 10 = Private doctor                                   |                                     |
| 11 |                                                         | 11 = Mobile clinic                                    |                                     |
| 12 |                                                         | 12 = Community health                                 |                                     |
| 13 |                                                         | worker/fieldworker                                    |                                     |
| 14 |                                                         | 13 = Other private medical sector                     |                                     |
| 15 |                                                         | (specify)                                             |                                     |
| 16 |                                                         | 14 = NGO hospital                                     |                                     |
| 17 |                                                         | 15 = NGO clinic                                       |                                     |
| 18 |                                                         | 16 = Other NGO medical sector                         |                                     |
| 19 |                                                         | (specify)                                             |                                     |
| 20 |                                                         | 17 = Shop                                             |                                     |
| 21 |                                                         | 18 = Traditional practitioner                         |                                     |
| 22 |                                                         | 19 = Market                                           |                                     |
| 23 |                                                         | 20 = Itinerant drug seller                            |                                     |
| 24 |                                                         | 99 = Other (specify)_____                             |                                     |
| 25 |                                                         |                                                       |                                     |
| 26 |                                                         |                                                       |                                     |
| 27 |                                                         |                                                       |                                     |
| 28 |                                                         |                                                       |                                     |
| 29 | 226                                                     | Was Child (Name) ever breastfed?                      | 1 = Yes<br>0 = No ( <b>Go 228</b> ) |
| 30 |                                                         |                                                       | _                                   |
| 31 | 227                                                     | How many months the child (NAME) was breastfed?       | _                                   |
| 32 |                                                         |                                                       |                                     |
| 33 | <b>Anthropometric and clinical nutrition assessment</b> |                                                       |                                     |
| 34 | 228                                                     | Weight                                                | _ _ _                               |
| 35 | 229                                                     | Height/length                                         | _ _ _                               |
| 36 | 230                                                     | MUAC                                                  | _ _ _                               |
| 37 | 231                                                     | Presence of bilateral oedema for children 6-59 months | 1 = Yes<br>0 = No                   |
| 38 |                                                         |                                                       | _                                   |
| 39 | 232                                                     | Bitot spot                                            | 1 = Yes<br>0 = No                   |
| 40 |                                                         |                                                       |                                     |
| 41 |                                                         |                                                       |                                     |
| 42 |                                                         |                                                       |                                     |
| 43 |                                                         |                                                       |                                     |
| 44 |                                                         |                                                       |                                     |
| 45 |                                                         |                                                       |                                     |
| 46 |                                                         |                                                       |                                     |
| 47 |                                                         |                                                       |                                     |
| 48 |                                                         |                                                       |                                     |
| 49 |                                                         |                                                       |                                     |
| 50 |                                                         |                                                       |                                     |
| 51 |                                                         |                                                       |                                     |
| 52 |                                                         |                                                       |                                     |
| 53 |                                                         |                                                       |                                     |
| 54 |                                                         |                                                       |                                     |
| 55 |                                                         |                                                       |                                     |
| 56 |                                                         |                                                       |                                     |
| 57 |                                                         |                                                       |                                     |
| 58 |                                                         |                                                       |                                     |
| 59 |                                                         |                                                       |                                     |
| 60 |                                                         |                                                       |                                     |



**Module 3: Infant and young child feeding practices**

| <b>For children 0-23 months</b>                                                                                                                                                                                        |                                                                                                                                                                                                                                                                                                                                                                                                                                                                            |                                                                                                                                         |       |
|------------------------------------------------------------------------------------------------------------------------------------------------------------------------------------------------------------------------|----------------------------------------------------------------------------------------------------------------------------------------------------------------------------------------------------------------------------------------------------------------------------------------------------------------------------------------------------------------------------------------------------------------------------------------------------------------------------|-----------------------------------------------------------------------------------------------------------------------------------------|-------|
| This module is to be administered to the mother/caregiver of children born 0-23 months before the survey living with respondents. Verify that the respondent you are speaking to is the mother/caregiver of the child. |                                                                                                                                                                                                                                                                                                                                                                                                                                                                            |                                                                                                                                         |       |
| 301                                                                                                                                                                                                                    | Was Child (Name) ever breastfed?                                                                                                                                                                                                                                                                                                                                                                                                                                           | 1 = Yes<br>0 = No ( <b>Go to 304</b> )<br>98 = Don't know                                                                               | _ _ _ |
| 302                                                                                                                                                                                                                    | Was Child (NAME) given the first milk (colostrum) after birth?                                                                                                                                                                                                                                                                                                                                                                                                             | 1 = Yes<br>0 = No<br>98 = Don't know                                                                                                    | _ _ _ |
| 303                                                                                                                                                                                                                    | How long after birth did you first put (NAME) to the breast, even if your breast milk did not arrive?                                                                                                                                                                                                                                                                                                                                                                      | 1 = Immediately after birth, or within 1 hour<br>2 = Between 1 and 24 hours<br>3 = More than 24 hours after delivery<br>98 = Don't know | _ _ _ |
| 304                                                                                                                                                                                                                    | Child (NAME) alive now?                                                                                                                                                                                                                                                                                                                                                                                                                                                    | 1 = Yes<br>0 = No ( <b>Go to 401</b> )                                                                                                  | _ _ _ |
| 305                                                                                                                                                                                                                    | Was (NAME) breastfed yesterday from sunrise until today sunrise?<br>NB: Breastfeeding could be by the mother herself or by wet mother.                                                                                                                                                                                                                                                                                                                                     | 1 = Yes<br>0 = No ( <b>Go to 307</b> )<br>98 = Don't know                                                                               | _ _ _ |
| 306                                                                                                                                                                                                                    | <i>Sometimes babies are fed breast milk in different ways, for example by spoon, cup or bottle. This can happen when the mother cannot always be with her baby. Sometimes babies are breastfed by another woman, or given breast milk from another woman by spoon, cup or bottle or some other way. This can happen if a mother cannot breastfeed her own baby.</i><br><br>Did (NAME) consume breast milk in any of these ways yesterday from sunrise until today sunrise? | 1 = Yes<br>0 = No<br>98 = Don't know                                                                                                    | _ _ _ |
| 307                                                                                                                                                                                                                    | Now I would like to ask you about some medicines and vitamins that are sometimes given to infants.<br><br>Was (NAME) given any vitamin drops or other medicines as drops yesterday from sunrise until today sunrise?                                                                                                                                                                                                                                                       | 1 = Yes<br>0 = No<br>98 = Don't know                                                                                                    | _ _ _ |
| 308                                                                                                                                                                                                                    | Was (NAME) given Lemlem or ORS in the last two weeks?                                                                                                                                                                                                                                                                                                                                                                                                                      | 1 = Yes<br>0 = No<br>98 = Don't know                                                                                                    | _ _ _ |

|                                                                                                                                                                                                                                                                                                                                                                                                                                                                                                                                                                                                                         |                                                                                                                                                                                                          |                                                                                                    |                   |
|-------------------------------------------------------------------------------------------------------------------------------------------------------------------------------------------------------------------------------------------------------------------------------------------------------------------------------------------------------------------------------------------------------------------------------------------------------------------------------------------------------------------------------------------------------------------------------------------------------------------------|----------------------------------------------------------------------------------------------------------------------------------------------------------------------------------------------------------|----------------------------------------------------------------------------------------------------|-------------------|
| 309                                                                                                                                                                                                                                                                                                                                                                                                                                                                                                                                                                                                                     | In the last 6 months, did any healthcare provider or community health worker talk with you about how and what to feed your child?                                                                        | 1 = Yes<br>0 = No<br>98 = Don't know                                                               | _ _ _             |
| 310                                                                                                                                                                                                                                                                                                                                                                                                                                                                                                                                                                                                                     | Now, I would like to ask you about some liquids that (NAME) may have had yesterday from sunrise until today sunrise?<br><br><b>If yes to Q310, read the list of liquids starting with 'plain water'.</b> | Did (NAME) have any (item from list)?<br>1 = Yes<br>0 = No ( <b>Go to 321</b> )<br>98 = Don't know | _ _ _             |
| 311                                                                                                                                                                                                                                                                                                                                                                                                                                                                                                                                                                                                                     | Plain water                                                                                                                                                                                              | 1 = Yes<br>0 = No<br>98 = Don't know                                                               | _ _ _             |
| 312                                                                                                                                                                                                                                                                                                                                                                                                                                                                                                                                                                                                                     | Infant formula such as S-26?                                                                                                                                                                             | 1 = Yes<br>0 = No ( <b>Go to 314</b> )<br>98 = Don't know                                          | _ _ _             |
| 313                                                                                                                                                                                                                                                                                                                                                                                                                                                                                                                                                                                                                     | How many times infant formula such as S-26?                                                                                                                                                              |                                                                                                    | _ _ _             |
| 314                                                                                                                                                                                                                                                                                                                                                                                                                                                                                                                                                                                                                     | Milk such as tinned, powdered, or fresh animal milk?                                                                                                                                                     | 1 = Yes<br>0 = No ( <b>Go to 316</b> )<br>98 = Don't know                                          | _ _ _             |
| 315                                                                                                                                                                                                                                                                                                                                                                                                                                                                                                                                                                                                                     | How many times milk drink?                                                                                                                                                                               |                                                                                                    | _ _ _             |
| 316                                                                                                                                                                                                                                                                                                                                                                                                                                                                                                                                                                                                                     | Yogurt drink?                                                                                                                                                                                            | 1 = Yes<br>0 = No<br>98 = Don't know                                                               | _ _ _             |
| 317                                                                                                                                                                                                                                                                                                                                                                                                                                                                                                                                                                                                                     | Chocolate flavored drink?                                                                                                                                                                                | 1 = Yes<br>0 = No<br>98 = Don't know                                                               | _ _ _             |
| 318                                                                                                                                                                                                                                                                                                                                                                                                                                                                                                                                                                                                                     | Sodas, malt drinks or energy drinks?                                                                                                                                                                     | 1 = Yes<br>0 = No<br>98 = Don't know                                                               | _ _ _             |
| 319                                                                                                                                                                                                                                                                                                                                                                                                                                                                                                                                                                                                                     | Clear broth or clear soup?                                                                                                                                                                               | 1 = Yes<br>0 = No<br>98 = Don't know                                                               | _ _ _             |
| 320                                                                                                                                                                                                                                                                                                                                                                                                                                                                                                                                                                                                                     | Any other liquids?                                                                                                                                                                                       | 1 = Yes<br>0 = No<br>98 = Don't know                                                               | _ _ _             |
| <p>Now I would like to ask you about foods that (NAME) had yesterday during the day or night. I am interested in foods your child ate whether at home or somewhere else. I will ask you about different types of foods, and I would like to know whether your child ate the food even if it was combined with other foods. Please do not answer 'yes' for any food or ingredient used in a small amount to add flavor to a dish.</p> <p>OTHER FOODS: Please write down other foods in this box that respondent mentioned but are not in the list below</p> <p>Yesterday during the day or at night, did (NAME) eat:</p> |                                                                                                                                                                                                          |                                                                                                    |                   |
| 321                                                                                                                                                                                                                                                                                                                                                                                                                                                                                                                                                                                                                     | Did the child ate any solid or semi-solid food yesterday?                                                                                                                                                |                                                                                                    | Eaten?<br>1 = Yes |

|     |                                                                                                                            | 0 = No ( <b>Go to 342</b> )<br>98 = Don't know                |
|-----|----------------------------------------------------------------------------------------------------------------------------|---------------------------------------------------------------|
| 322 | Yogurt, other than yogurt drink?                                                                                           | __                                                            |
| 323 | How many times did child (NAME) eat yogurt?                                                                                | __                                                            |
| 324 | Injera, bread, rice, noodles, pasta, macaroni, porridge, or other foods made from grains such as tef, oats, maize, barley? | __                                                            |
| 325 | Any commercially fortified baby food like Fafa, Hilina, Cerilak, Cerifam, Mother Choice?                                   |                                                               |
| 326 | Pumpkin, carrots, squash, or sweet potatoes that are yellow or orange inside?                                              | __                                                            |
| 327 | White potatoes, white yams, bulla, kocho, manioc, cassava or any other foods made from roots?                              | __                                                            |
| 328 | Any dark green leafy vegetables (kale, dark green lettuce, moringa ...)?                                                   | __                                                            |
| 329 | Any other vegetable?                                                                                                       |                                                               |
| 330 | Ripe mangoes, ripe papayas (insert other local vitamin a-rich fruits)?                                                     | __                                                            |
| 331 | Any other fruit?                                                                                                           | __                                                            |
| 332 | Liver, kidney, heart, or other organ meats?                                                                                | __                                                            |
| 333 | Any meat, such as beef, pork, lamb, goat, chicken?                                                                         | __                                                            |
| 334 | Egg?                                                                                                                       | __                                                            |
| 335 | Fresh or dried fish, shellfish, or seafood?                                                                                | __                                                            |
| 336 | Any foods made from beans, peas, lentils, nuts, or seeds?                                                                  | __                                                            |
| 337 | Cheese or other food made from milk?                                                                                       | __                                                            |
| 338 | Any sugary foods such as chocolates, sweets, candies, pastries, cakes, or biscuits                                         | __                                                            |
| 339 | Any savory junk foods, such as crisps/chips/salted biscuits/instant noodles?                                               | __                                                            |
| 340 | Any other solid, semi-solid, or soft food?                                                                                 | __                                                            |
| 341 | How many times did (NAME) eat solid, semi-solid, or soft foods other than liquids yesterday during the day or at night?    | Fill in the number of times.<br>98 = Don't know<br><br> _ _ _ |
| 342 | Did (NAME) drink anything from a bottle with a nipple yesterday during the day or night?                                   | 1 = Yes<br>0 = No<br>98 = Don't know<br><br> _ _ _            |

**Module 4: KAP of mothers or caregivers on children's care and feeding**

|                                                                                                                      |                                                                                                                                       |                                                                                                                                                                                                                        |       |
|----------------------------------------------------------------------------------------------------------------------|---------------------------------------------------------------------------------------------------------------------------------------|------------------------------------------------------------------------------------------------------------------------------------------------------------------------------------------------------------------------|-------|
| I am going to read you some knowledge questions about breastfeeding. Please tell me your answers on these questions. |                                                                                                                                       |                                                                                                                                                                                                                        |       |
| 401                                                                                                                  | How long after birth should a baby start breastfeeding?                                                                               | 1 = Immediately, within 1 hour of delivery<br>2 = Some hours later but within 24 hours<br>3 = After 1 day<br>4 = After 2 days<br>5 = After >3 days<br>6 = Does not think a baby should be breastfed<br>98 = Don't know | _ _ _ |
| 402                                                                                                                  | How long should a baby receive nothing other than breast milk?                                                                        | 1 = From birth to six months<br>2 = Other<br>98 = Don't know                                                                                                                                                           | _ _ _ |
| 403                                                                                                                  | How often should a baby younger than six months be breastfed or fed with breast milk?                                                 | 1 = On-demand, whenever the baby wants<br>2 = Other<br>98 = Don't know                                                                                                                                                 | _ _ _ |
| 404                                                                                                                  | How much should a child be fed when he/she is sick?                                                                                   | 1 = Less frequent than usual<br>2 = Same as usual<br>3 = More than usual<br>98 = Don't know                                                                                                                            | _ _ _ |
| 405                                                                                                                  | How often should a child be fed when he/she is sick?                                                                                  | 1 = Less frequently than usual<br>2 = Same as usual<br>3 = More frequently than usual<br>98 = Don't know                                                                                                               | _ _ _ |
| 406                                                                                                                  | At what age should a baby first start to receive foods in addition to breast milk?                                                    | Months of age (Specify)<br>98= Don't know                                                                                                                                                                              | _ _ _ |
| 407                                                                                                                  | At what age should children begin observing fasting days if that is their culture or religion?<br>(If <2 years, enter age in months.) | Years of age (Specify)<br>98=Don't know/remember                                                                                                                                                                       | _ _ _ |
| 408                                                                                                                  | Have you ever heard of child stunting?                                                                                                | 1 = Yes<br>0 = No<br>98 = Don't know                                                                                                                                                                                   | _ _ _ |
| 409                                                                                                                  | What age are children at the highest risk of becoming stunted?                                                                        | Years of age (Specify)<br>Months of age (Specify)<br>98 = Don't know/remember                                                                                                                                          | _ _ _ |
| 410                                                                                                                  | What are the consequences of stunting for young children?<br>Mark all that are mentioned by the respondent                            | 1 = Higher risk of severe infectious diseases<br>2 = Poor educational performance<br>3 = Weaker immune system<br>4 = Low adult wages<br>5 = Lost productivity<br>6 = Excessive weight gain in later life               | _ _ _ |

|                                                                                                                                                                                                                                                                              |                                                                                                                          |                                                                                                                                        |       |
|------------------------------------------------------------------------------------------------------------------------------------------------------------------------------------------------------------------------------------------------------------------------------|--------------------------------------------------------------------------------------------------------------------------|----------------------------------------------------------------------------------------------------------------------------------------|-------|
|                                                                                                                                                                                                                                                                              |                                                                                                                          | 7 = Increased risk of nutrition-related chronic diseases in adult life<br>8 = Increased mortality rate<br>98= Don't know<br>99 = Other |       |
| 411                                                                                                                                                                                                                                                                          | Poor diet during pregnancy and the first two years of child age can cause child stunting                                 | 1 = Agree<br>2 = Do not agree<br>98 = Don't know                                                                                       | _ _ _ |
| I am going to read you some statements about breastfeeding and complementary feeding made by other mothers who live in a community like yours. Please tell me if you agree with these statements. Remember, there are no correct answers! I would like to know your opinion. |                                                                                                                          |                                                                                                                                        |       |
| 412                                                                                                                                                                                                                                                                          | The colostrum (the "first yellowish milk") is not good for the baby and should be discarded                              | 1 = Strongly disagree<br>2 = Disagree<br>3 = Agree somewhat<br>4 = Agree<br>5 = Strongly agree<br>98 = Don't know                      | _ _ _ |
| 413                                                                                                                                                                                                                                                                          | It is good to exclusively breastfeed give a baby only breast milk and no other foods or liquids for the first six months | 1 = Strongly disagree<br>2 = Disagree<br>3 = Agree somewhat<br>4 = Agree<br>5 = Strongly agree<br>98 = Don't know                      | _ _ _ |
| 414                                                                                                                                                                                                                                                                          | If a child is sick (for example has fever/diarrhea) breastfeeding must be continued                                      | 1 = Strongly disagree<br>2 = Disagree<br>3 = Agree somewhat<br>4 = Agree<br>5 = Strongly agree<br>98 = Don't know                      | _ _ _ |
| 415                                                                                                                                                                                                                                                                          | A child should eat eggs, cow milk, or meat even on fasting days                                                          | 1 = Strongly disagree<br>2 = Disagree<br>3 = Agree somewhat<br>4 = Agree<br>5 = Strongly agree<br>98 = Don't know                      | _ _ _ |
| 416                                                                                                                                                                                                                                                                          | Eating a meal from different food groups is not necessary until children are old enough to go to school                  | 1 = Strongly disagree<br>2 = Disagree<br>3 = Agree somewhat<br>4 = Agree<br>5 = Strongly agree<br>98 = Don't know                      | _ _ _ |
| 417                                                                                                                                                                                                                                                                          | It is good to feed a two years child at least four times each day                                                        | 1 = Strongly disagree<br>2 = Disagree<br>3 = Agree somewhat<br>4 = Agree<br>5 = Strongly agree<br>98 = Don't know                      | _ _ _ |
| 418                                                                                                                                                                                                                                                                          | A mother should eat nutritious food                                                                                      | 1 = Strongly disagree                                                                                                                  | _ _ _ |

|     |                                                               |                                                                                                                   |       |
|-----|---------------------------------------------------------------|-------------------------------------------------------------------------------------------------------------------|-------|
|     | (four) times daily from the time of pregnancy                 | 2 = Disagree<br>3 = Agree somewhat<br>4 = Agree<br>5 = Strongly agree<br>98 = Don't know                          |       |
| 419 | A mother should take iron folic acid tablets during pregnancy | 1 = Strongly disagree<br>2 = Disagree<br>3 = Agree somewhat<br>4 = Agree<br>5 = Strongly agree<br>98 = Don't know | _ _ _ |
| 420 | A mother should take iodized salt during pregnancy            | 1 = Strongly disagree<br>2 = Disagree<br>3 = Agree somewhat<br>4 = Agree<br>5 = Strongly agree<br>98 = Don't know | _ _ _ |
| 421 | A mother should take de-worming medicines during pregnancy    | 1 = Strongly disagree<br>2 = Disagree<br>3 = Agree somewhat<br>4 = Agree<br>5 = Strongly agree<br>98 = Don't know | _ _ _ |

### Module 5: Adolescent girls (10-19 Years)

|                                                                                                                                                                                                                                                    |                                                                                                                    |                                                                                                                                     |       |
|----------------------------------------------------------------------------------------------------------------------------------------------------------------------------------------------------------------------------------------------------|--------------------------------------------------------------------------------------------------------------------|-------------------------------------------------------------------------------------------------------------------------------------|-------|
| Hint; This section is administered for Adolescent girls 10-19 years old. Provide a paper copy of both the informed consent and Assent Form to the respondent Read the consent (for mothers of adolescent girls) and Assent (adolescent girls) form |                                                                                                                    |                                                                                                                                     |       |
| 501                                                                                                                                                                                                                                                | Girl's code                                                                                                        |                                                                                                                                     | _ _ _ |
| 502                                                                                                                                                                                                                                                | Girl's name                                                                                                        | Given name                                                                                                                          |       |
| 503                                                                                                                                                                                                                                                | Girl's age                                                                                                         |                                                                                                                                     |       |
| 504                                                                                                                                                                                                                                                | Girl's education level                                                                                             | 1=None<br>1=Primary<br>2=Secondary<br>3=Technical/vocational certificate<br>98=Don't know<br>99=Other (specify)                     |       |
| 505                                                                                                                                                                                                                                                | Girl's marital status                                                                                              | 1 = Single<br>2 = Married<br>3 = Divorced<br>4 = Separated<br>5 = Widowed                                                           |       |
| 506                                                                                                                                                                                                                                                | Girl's religion                                                                                                    | 1=Orthodox<br>2=Protestant<br>3=Catholic/ other Christian<br>4=Muslim<br>5=No religion<br>98=Don't know<br>Other religion (specify) |       |
| 507                                                                                                                                                                                                                                                | Girl's ethnicity                                                                                                   | specify                                                                                                                             |       |
| 508                                                                                                                                                                                                                                                | Are you currently a student                                                                                        | 1 = Yes<br>0 = No                                                                                                                   | _     |
| 509                                                                                                                                                                                                                                                | Were you given any iron/folate tablets at school or out of school? ( <b>show the tablet</b> )                      | 1 = Yes<br>0 = No ( <b>Go to 511</b> )                                                                                              | _     |
| 510                                                                                                                                                                                                                                                | How many weeks per month have you taken the iron tablets?                                                          | Weeks per month (specify)<br>98 = don't know                                                                                        | _ _ _ |
| 511                                                                                                                                                                                                                                                | Were you given any drug for intestinal worms at school or out of school in the last six months?                    | 1 = Yes<br>0 = No                                                                                                                   | _     |
| 512                                                                                                                                                                                                                                                | Have you received any nutrition counseling in the last six months?                                                 | 1 = Yes<br>0 = No                                                                                                                   | _     |
| 513                                                                                                                                                                                                                                                | Did you receive nutritional assessment services in health facilities when you went for any kind of health service? | 1 = Yes<br>0 = No                                                                                                                   | _     |
| 514                                                                                                                                                                                                                                                | Is there any food taboo for adolescent girls in your community?                                                    | 1 = Yes<br>0 = No ( <b>Go to 516</b> )                                                                                              | _     |
| 515                                                                                                                                                                                                                                                | Mention types of food taboo?                                                                                       |                                                                                                                                     |       |
| Anthropometry and clinical nutrition assessment                                                                                                                                                                                                    |                                                                                                                    |                                                                                                                                     |       |
| 516                                                                                                                                                                                                                                                | Weight (in kg)                                                                                                     |                                                                                                                                     |       |
| 517                                                                                                                                                                                                                                                | Height (in CM)                                                                                                     |                                                                                                                                     |       |
| 518                                                                                                                                                                                                                                                | Waist circumference (in CM)                                                                                        |                                                                                                                                     |       |

1  
2  
3  
4  
5  
6  
7  
8  
9  
10  
11  
12  
13  
14  
15  
16  
17  
18  
19  
20  
21  
22  
23  
24  
25  
26  
27  
28  
29  
30  
31  
32  
33  
34  
35  
36  
37  
38  
39  
40  
41  
42  
43  
44  
45  
46  
47  
48  
49  
50  
51  
52  
53  
54  
55  
56  
57  
58  
59  
60

|     |        |                 |
|-----|--------|-----------------|
| 519 | Goiter | 1 = Yes, 0 = No |
|-----|--------|-----------------|

For peer review only



## Module 6: Reproductive age women (15-49 Years)

| For currently pregnant women |                                                                                              |                                                                                                                                                                                                 |       |
|------------------------------|----------------------------------------------------------------------------------------------|-------------------------------------------------------------------------------------------------------------------------------------------------------------------------------------------------|-------|
| 601                          | Woman's code                                                                                 |                                                                                                                                                                                                 |       |
| 602                          | Woman's name                                                                                 | Given name                                                                                                                                                                                      |       |
| 603                          | Woman's age                                                                                  |                                                                                                                                                                                                 |       |
| 604                          | Woman's education level                                                                      | 1=None<br>2=Primary<br>3=Secondary<br>4=Technical/vocational certificate<br>5=Higher / university/ college<br>98=Don't know<br>99=Other (specify)                                               |       |
| 605                          | Woman's marital status                                                                       | 1 = Single<br>2 = Married<br>3 = Divorced<br>4 = Separated<br>5 = Widowed                                                                                                                       |       |
| 606                          | Woman's religion                                                                             | 1=Orthodox<br>2=Protestant<br>3=Catholic/ other Christian<br>4=Muslim<br>5=No religion<br>98=Don't know<br>99=Other religion (specify)                                                          |       |
| 607                          | Woman's ethnicity                                                                            | Specify                                                                                                                                                                                         |       |
| 608                          | What was your age at first marriage                                                          | Year (specify)<br>96=Not applicable<br>98=Don't know                                                                                                                                            | _ _ _ |
| 609                          | What was your age at your first pregnancy                                                    | Year (specify)<br>96=Not applicable<br>98=Don't know                                                                                                                                            | _ _ _ |
| 610                          | Were you pregnant in the last 3 years?                                                       | 1= Yes<br>0=No ( <b>Go to 629</b> )                                                                                                                                                             |       |
| 611                          | Did you see anyone for antenatal care for the pregnancy?                                     | 1 = Yes<br>0 = No ( <b>Go to 629</b> )                                                                                                                                                          | _     |
| 612                          | Whom did you see for antenatal care?<br>Probe to identify each type of person and record all | 1=Health personnel<br>2 = Doctor<br>3 = Nurse<br>4 = Midwife<br>5= Health officer<br>6 = Health extension worker<br>7 = Other person<br>8 = Traditional birth Attendant<br>99 = Other (specify) | _ _ _ |
| 613                          | Where did you receive antenatal care for this pregnancy?<br>Anywhere else?                   | 1= My home<br>2 = Her home<br>3 = Other home<br>4 = Health center                                                                                                                               | _ _ _ |

|     |                                                                                                                                                         |                                                                                                                                                                                                                                 |       |
|-----|---------------------------------------------------------------------------------------------------------------------------------------------------------|---------------------------------------------------------------------------------------------------------------------------------------------------------------------------------------------------------------------------------|-------|
|     |                                                                                                                                                         | 5 = Government Hospital<br>6 = Private Clinic or Hospital<br>7 = Health post<br>8 = NGO clinic or hospital<br>99 = Other SPECIFY                                                                                                |       |
| 614 | How many months pregnant were you when you first received antenatal care for this pregnancy?                                                            | Months (Specify)<br>98 = Don't know                                                                                                                                                                                             | _ _ _ |
| 615 | How many times did you receive antenatal care during this pregnancy?                                                                                    | Number of times (specify)<br>98 = Don't know                                                                                                                                                                                    | _ _ _ |
| 616 | As part of your antenatal care during this pregnancy, were any of the following done at least once:                                                     | 1 = Yes 0 = No                                                                                                                                                                                                                  |       |
|     |                                                                                                                                                         | Was your blood pressure measured?                                                                                                                                                                                               | _     |
|     |                                                                                                                                                         | Did you give a urine sample?                                                                                                                                                                                                    | _     |
|     |                                                                                                                                                         | Did you give a blood sample?                                                                                                                                                                                                    | _     |
|     |                                                                                                                                                         | Did a health care provider talk with you about which foods to eat while pregnant?                                                                                                                                               | _     |
|     |                                                                                                                                                         | Did a health care provider weigh you?                                                                                                                                                                                           | _     |
|     |                                                                                                                                                         | Did a health care provider talk with you about your weight?                                                                                                                                                                     | _     |
| 617 | During this pregnancy, did you ever receive food or cash assistance from government, an NGO, religious institution or other group?                      | 1 = Yes<br>0 = No ( <b>Go to 619</b> )                                                                                                                                                                                          | _     |
| 618 | What type of assistance did you receive?                                                                                                                | 1 = Cash only<br>2 = Food only<br>3 = Cash and food mix<br>99 = Other (specify)                                                                                                                                                 | _ _ _ |
| 619 | During this pregnancy, were you given or did you buy any iron tablets or iron syrup?<br><br><b>show tablets/syrup/multiple micronutrient supplement</b> | 1 = Yes<br>0 = No ( <b>Go to 622</b> )<br>98 = Don't Know ( <b>Go to 622</b> )                                                                                                                                                  | _ _ _ |
| 620 | Where did you get the iron tablet or syrup from?                                                                                                        | 1 = Govt. Health Facility<br>2 = Private Health Facility<br>3 = Mobile Clinic<br>4 = CHW<br>5 = [Mass Distribution Campaign – Add Local Name]<br>6 = Pharmacy<br>7 = Shop/Market<br>8 = School<br>98 = Don't Know<br>99 = Other | _ _ _ |
| 621 | During this pregnancy, for how many days did you take the iron tablets?<br><b>If answer is not numeric, probe for</b>                                   | Number of days (specify)<br>98 = Don't Know                                                                                                                                                                                     | _ _ _ |

| <i>approximate number of days.</i> |                                                                                              |                                                           |       |
|------------------------------------|----------------------------------------------------------------------------------------------|-----------------------------------------------------------|-------|
| 622                                | During this pregnancy, did you take any drug for intestinal worms?                           | 1 = Yes<br>0 = No<br>98 = Don't Know                      | _ _ _ |
| 623                                | During this pregnancy, did any health care provider talk with you about breastfeeding?       | 1 = Yes<br>0 = No<br>98 = Don't Know                      | _ _ _ |
| 624                                | During this pregnancy, did you practice fasting?                                             | 1 = Yes<br>0 = No<br>98 = Don't Know                      | _ _ _ |
| 625                                | At your last ANC visit, did the health provider weigh you?                                   | 1 = Yes<br>0 = No<br>98 = Don't Know                      | _ _ _ |
| 626                                | During this pregnancy has your health provider given you information about your weight gain? | 1 = Yes<br>0 = No ( <b>Go to 629</b> )<br>98 = Don't Know | _ _ _ |
| 627                                | During your pregnancy have you been thin for your height?                                    | 1 = Yes<br>0 = No<br>98 = Don't Know                      | _ _ _ |
| 628                                | Did you received treatment for malnutrition?                                                 | 1 = Yes<br>0 = No                                         | _ _ _ |
| <b>Anthropometry</b>               |                                                                                              |                                                           |       |
| 629                                | Weight (in kg)                                                                               |                                                           |       |
| 630                                | Height (in CM)                                                                               |                                                           |       |
| 631                                | MUAC                                                                                         |                                                           |       |
| 632                                | Waist circumference (in cm)                                                                  |                                                           |       |
| 633                                | Goiter                                                                                       | 1 = Yes<br>0 = No                                         |       |

### Module 7: Women Dietary Diversity

"Now I'd like to ask you about foods and drinks that you ate or drank yesterday during the day or night, whether you ate it at home or anywhere else.

Yesterday, during the day or at night did you eat or drink:

| S.N | Question                                                                                                                                                                                   | Response<br>1 = Yes<br>0 = No                                                                                                                     |
|-----|--------------------------------------------------------------------------------------------------------------------------------------------------------------------------------------------|---------------------------------------------------------------------------------------------------------------------------------------------------|
| 701 | Woman's code                                                                                                                                                                               |                                                                                                                                                   |
| 702 | Woman's name                                                                                                                                                                               | Given name                                                                                                                                        |
| 703 | Woman's age                                                                                                                                                                                |                                                                                                                                                   |
| 704 | Woman's education level                                                                                                                                                                    | 0=None<br>1=Primary<br>2=Secondary<br>3=Technical/vocational certificate<br>4=Higher / university/ college<br>98=Don't know<br>99=Other (specify) |
| 705 | Woman's marital status                                                                                                                                                                     | 1= Single<br>2= Married<br>3= Divorced<br>4= Separated<br>5= Widowed                                                                              |
| 706 | Woman's religion                                                                                                                                                                           | 1=Orthodox<br>2=Protestant<br>3=Catholic/other Christian<br>4=Muslim<br>5=No religion<br>98=Don't know<br>99=Other religion (specify)             |
| 707 | Woman's ethnicity                                                                                                                                                                          | Specify                                                                                                                                           |
| 708 | Any vegetables or roots that are orange-colored inside, like: pumpkin, carrots, squash, or sweet potatoes that are yellow or orange inside                                                 | _                                                                                                                                                 |
| 709 | Any white roots and tubers or plantains, such as: white potatoes, white yams, manioc/cassava/yucca, cocoyam, taro or any other foods made from white-fleshed roots or tubers, or plantains | _                                                                                                                                                 |
| 710 | Any dark green leafy vegetables, such as: [list examples of any medium-to-dark green leafy vegetables including wild/foraged leaves]                                                       | _                                                                                                                                                 |
| 711 | Any fruits that are dark yellow or orange inside, like: ripe mango, ripe papaya                                                                                                            | _                                                                                                                                                 |
| 712 | Any other fruits                                                                                                                                                                           | _                                                                                                                                                 |
| 713 | Any other vegetables                                                                                                                                                                       | _                                                                                                                                                 |
| 714 | Any meat made from animal organs, such as: liver, kidney, heart or other organ meats or blood-based foods, including from wild game                                                        | _                                                                                                                                                 |
| 715 | Any other types of meat or poultry, like: beef, pork, lamb, goat, rabbit, wild game meat, chicken, duck, other birds                                                                       | _                                                                                                                                                 |

|     |                                                                                                                                                                                         |   |
|-----|-----------------------------------------------------------------------------------------------------------------------------------------------------------------------------------------|---|
| 716 | Any eggs                                                                                                                                                                                | _ |
| 717 | Any fish or seafood, whether fresh or dried                                                                                                                                             | _ |
| 718 | Any beans or peas, such as: mature beans or peas (fresh or dried seed), lentils, or bean/pea products, including hummus, tofu and tempeh                                                | _ |
| 719 | Any nuts or seeds, like tree nut, groundnut/peanut, or certain seeds or nut/seed “butters” or pastes                                                                                    | _ |
| 720 | Any milk or milk products, such as: milk, cheese, yoghurt or other milk products, but not including butter, ice cream, cream or sour cream                                              | _ |
| 721 | Any oils and fats                                                                                                                                                                       | _ |
| 722 | Any savory and fried snacks, such as: crisps and chips, fried dough, other fried snacks                                                                                                 | _ |
| 723 | Any sweets, such as: sugary foods, such as chocolates, candies, cookies/sweet biscuits and cakes, sweet pastries or ice cream                                                           | _ |
| 724 | Any sugar-sweetened beverages, like: sweetened fruit juices and “juice drinks”, soft drinks/fizzy drinks, chocolate drinks, malt drinks, yoghurt drinks, sweet tea or coffee with sugar | _ |
| 725 | Any condiments and seasonings, such as: ingredients used in small quantities for flavour, such as chilies, spices, herbs, fish powder, tomato paste, flavor cubes or seeds              | _ |
| 726 | Any other beverages and foods like tela, tej, bordea, arkea, cheka, tselo                                                                                                               | _ |
| 727 | Did you eat anything (meal or snack) OUTSIDE of the home yesterday?                                                                                                                     | _ |
| 728 | Did you fast yesterday during the day or night?                                                                                                                                         | _ |

1  
2  
3  
4  
5  
6  
7  
8  
9  
10  
11  
12  
13  
14  
15  
16  
17  
18  
19  
20  
21  
22  
23  
24  
25  
26  
27  
28  
29  
30  
31  
32  
33  
34  
35  
36  
37  
38  
39  
40  
41  
42  
43  
44  
45  
46  
47  
48  
49  
50  
51  
52  
53  
54  
55  
56  
57  
58  
59  
60

**Module 8: SELF-REPORTING QUESTIONNAIRE (SRQ-20)**

| No  | Question                                                 | Answer<br>1 = Yes<br>0 = No |   |
|-----|----------------------------------------------------------|-----------------------------|---|
| 801 | Do you often have headaches?                             |                             | _ |
| 802 | Is your appetite poor?                                   |                             | _ |
| 803 | Do you sleep badly?                                      |                             | _ |
| 804 | Are you easily frightened?                               |                             | _ |
| 805 | Do your hands shake?                                     |                             | _ |
| 806 | Do you feel nervous, tense or worried?                   |                             | _ |
| 807 | Is your digestion poor?                                  |                             | _ |
| 808 | Do you have trouble thinking clearly?                    |                             | _ |
| 809 | Do you feel unhappy?                                     |                             | _ |
| 810 | Do you cry more than usual?                              |                             | _ |
| 811 | Do you find it difficult to enjoy your daily activities? |                             | _ |
| 812 | Do you find it difficult to make decisions?              |                             | _ |
| 813 | Is your daily work suffering?                            |                             | _ |
| 814 | Are you unable to play a useful part in life?            |                             | _ |
| 815 | Have you lost interest in things?                        |                             | _ |
| 816 | Do you feel that you are a worthless person?             |                             | _ |
| 817 | Has the thought of ending your life been on your mind?   |                             | _ |
| 818 | Do you feel tired all the time?                          |                             | _ |
| 819 | Do you have uncomfortable feelings in your stomach?      |                             | _ |
| 820 | Are you easily tired?                                    |                             | _ |

## Module 9: Women empowerment

|     |                                                                                                                                                               |                                                                             |       |
|-----|---------------------------------------------------------------------------------------------------------------------------------------------------------------|-----------------------------------------------------------------------------|-------|
| 901 | Identify the most senior mother of the mothers who have a selected child. She is the mother who should respond to the rest of this interview from this point. |                                                                             | _ _ _ |
| 902 | In the past major growing season (Meher) and minor growing (Belg) season, not including the current season, did you work on the family farm?                  | 1 = Yes<br>0 = No → <b>Go to 913</b> )                                      | _     |
| 903 | What sort of work you did on the family farm?                                                                                                                 | 1 = Home (kitchen) gardening                                                | _     |
| 904 |                                                                                                                                                               | 2 = Fieldwork                                                               | _     |
| 905 |                                                                                                                                                               | 3 = Cash crop farming                                                       | _     |
| 906 |                                                                                                                                                               | 4 = Dairy processing                                                        | _     |
| 907 |                                                                                                                                                               | 5 = Poultry rearing                                                         | _     |
| 908 |                                                                                                                                                               | 6 = Raising livestock                                                       | _     |
| 909 |                                                                                                                                                               | 7 = Fishpond/ aquaculture                                                   | _     |
| 910 |                                                                                                                                                               | 99 = Other (specify)                                                        | _     |
| 911 | From the work that you did on the farm did your household earn any money?                                                                                     | 1 = Yes<br>0 = No<br>98 = Don't know                                        | _     |
| 912 | Who usually decides how the money you earn will be used?<br><br><b>READ THE LIST.</b>                                                                         | 1 = Self<br>2 = Husband<br>3 = Self and husband jointly<br>4 = Someone else | _     |
| 913 | Who usually makes decisions about major household purchases/sell such as cattle or livestock?<br><br><b>READ THE LIST.</b>                                    | 1 = Self<br>2 = Husband<br>3 = Self and husband jointly<br>4 = Someone else | _     |
| 914 | Who usually makes decisions about minor household purchases/sell such as spices/oils, soap, utensils, or daily household needs?<br><br><b>READ THE LIST.</b>  | 1 = Self<br>2 = Husband<br>3 = Self and husband jointly<br>4 = Someone else | _     |
| 915 | Who usually makes decisions about health care for your children?<br><br><b>READ THE LIST.</b>                                                                 | 1 = Self<br>2 = Husband<br>3 = Self and husband jointly<br>4 = Someone else | _     |
| 916 | Do you have husband?                                                                                                                                          | 1 = Yes<br>0 = No ( <b>Go to 918</b> )                                      | _     |
| 917 | Who usually decides how the money your husband earns will be used?<br><br><b>READ THE LIST.</b>                                                               | 1 = Self<br>2 = Husband<br>3 = Self and husband jointly<br>4 = Someone else | _     |

|     |                                                                                                                                                |                                                         |   |
|-----|------------------------------------------------------------------------------------------------------------------------------------------------|---------------------------------------------------------|---|
| 918 | Do you have children?                                                                                                                          | 1 = Yes<br>0 = No ( <b>Go to 923</b> )                  |   |
| 919 | Does your husband help you care for the children?                                                                                              | 1 = Yes<br>0 = No ( <b>Go to 923</b> )                  | _ |
| 920 | Does he help care for the children almost every day, at least once a week, or rarely?                                                          | 1 = Every day<br>2 = At least once a week<br>3 = Rarely | _ |
| 921 | Does your husband help you with household chores like cooking, cleaning the house, fetching water, collecting firewood or other domestic work? | 1 = Yes<br>0 = No ( <b>Go to 923</b> )                  | _ |
| 922 | Does he help almost every day, at least once a week, or rarely?                                                                                | 1 = Every day<br>2 = At least once a week<br>3 = Rarely | _ |

|     |                                                                    |                                                                                |                                      |         |
|-----|--------------------------------------------------------------------|--------------------------------------------------------------------------------|--------------------------------------|---------|
| 923 | At any time during the previous                                    | Use improved seed varieties for any of your crops?                             | 1 = Yes<br>0 = No<br>98 = Don't know | _     _ |
| 924 | major seasons (Meher) and minor season                             | Keep improved varieties of livestock?                                          | 1 = Yes<br>0 = No<br>98 = Don't know | _     _ |
| 925 | (Belg) not including the current                                   | Use animal manure to improve you crops yield?                                  | 1 = Yes<br>0 = No<br>98 = Don't know | _     _ |
| 926 | season,<br>Did you:                                                | Use any other source of fertilizer on your crops?                              | 1 = Yes<br>0 = No<br>98 = Don't know | _     _ |
| 927 |                                                                    | Irrigate your crops?                                                           | 1 = Yes<br>0 = No<br>98 = Don't know | _     _ |
| 928 |                                                                    | Rotate your crops from one field to another when planting?                     | 1 = Yes<br>0 = No<br>98 = Don't know | _     _ |
| 929 |                                                                    | Harvest water during the rains?                                                | 1 = Yes<br>0 = No<br>98 = Don't know | _     _ |
| 930 |                                                                    | Practice intercropping?                                                        | 1 = Yes<br>0 = No<br>98 = Don't know | _     _ |
| 931 | Have you ever taken any steps to reduce soil erosion on your farm? | 1 = Yes<br>0 = No ( <b>Go to 936</b> )<br>98 = Don't know ( <b>Go to 936</b> ) | _     _                              |         |
|     |                                                                    | For each mentioned: 1=Yes 0=No                                                 |                                      |         |
| 932 | What steps did you take to reduce soil erosion?                    | Plant trees or shrubs                                                          | _                                    |         |
| 933 |                                                                    | Terracing                                                                      | _                                    |         |



|     |                                                                              |                                          |    |
|-----|------------------------------------------------------------------------------|------------------------------------------|----|
| 934 |                                                                              | Use drainage system                      | __ |
| 935 |                                                                              | Other                                    | __ |
| 936 | Have you received any inputs for your farm from a social/government program? | 1 = Yes<br>0 = No ( <b>Go to 1001</b> )  | __ |
| 937 | What farm inputs have you received?                                          | For each mentioned: 1=Yes 0=No           |    |
| 938 |                                                                              | Seeds                                    | __ |
| 939 |                                                                              | Improved seeds                           | __ |
| 940 |                                                                              | Livestock or poultry                     | __ |
| 941 |                                                                              | Improved varieties of livestock/ poultry | __ |
| 942 |                                                                              | Aquaculture (fish)                       | __ |
| 943 |                                                                              | Fertilizer                               | __ |
| 944 |                                                                              | Other                                    | __ |

For peer review only

## Module 10: WASH

| No   | Question                                                                                                                                         | choices                                                                                                                                                                                                                                                                                                                                                                                                                          |       |
|------|--------------------------------------------------------------------------------------------------------------------------------------------------|----------------------------------------------------------------------------------------------------------------------------------------------------------------------------------------------------------------------------------------------------------------------------------------------------------------------------------------------------------------------------------------------------------------------------------|-------|
| 1001 | What is the main source of drinking water for the household?<br><br><b>Do not read list</b>                                                      | 1 = Piped into dwelling<br>2 = Piped to yard/plot<br>3 = Piped to neighbour<br>4 = Public tap/standpipe<br>5 = Tube well or borehole<br>6 = Protected well<br>7 = Unprotected well<br>8 = Protected spring<br>9 = Unprotected spring<br>10 = Rainwater<br>11 = Tanker truck<br>12 = Cart with small tank<br>13 = Surface water (river/dam/<br>Lake/pond/stream/canal/ irrigation<br>channel)<br>14 = Bottled water<br>99 = Other | _ _ _ |
| 1002 | Do you do anything to your household water to make it safer to drink?                                                                            | 1 = Yes<br>0 = No ( <b>Go to 1004</b> )<br>98 = Don't know ( <b>Go to 1004</b> )                                                                                                                                                                                                                                                                                                                                                 | _ _ _ |
| 1003 | What is the main thing you do to make the water safer?                                                                                           | 1 = Boil<br>2 = Add bleach/chlorine<br>3 = Strain through a cloth<br>4 = Use water filter (ceramic/<br>Sand/composite/etc)<br>5 = Solar disinfection<br>6 = Let it stand and settle<br>7 = Other(specify)<br>98 = Don't know                                                                                                                                                                                                     | _ _ _ |
| 1004 | What kind of toilet facility do members of your household usually use? If not possible to determine, ask for Permission to observe the facility. | 1 = Flush to piped sewer system<br>2 = Flush to septic tank<br>3 = Flush to pit latrine<br>4 = Flush to somewhere else<br>5 = Flush, don't know where<br>6 = Ventilated improved pit latrine<br>7 = Pit latrine with slab<br>8 = Pit latrine without slab/open pit<br>9 = Composting toilet<br>10 = Bucket toilet<br>11 = Hanging toilet/hanging latrine<br>12 = No facility/bush/field<br>99 = Other (specify)_____             | _ _ _ |
| 1005 | How does your HH primarily dispose of HH waste?                                                                                                  | 1 = Collected by municipality<br>2 = Buried<br>3 = Collected by private establishment<br>4 = Dumped in street/open space                                                                                                                                                                                                                                                                                                         | _ _ _ |

|      |                                                                                         |                                                                                                                                                                                                                                                                                                                  |       |
|------|-----------------------------------------------------------------------------------------|------------------------------------------------------------------------------------------------------------------------------------------------------------------------------------------------------------------------------------------------------------------------------------------------------------------|-------|
|      |                                                                                         | 5 = Disposed in the compound<br>6 = Dumped in river<br>7 = Burned<br>98 = Other                                                                                                                                                                                                                                  |       |
| 1006 | Do you have separate cooking room?                                                      | 1 = Yes<br>2 = No ( <b>Go to 1008</b> )                                                                                                                                                                                                                                                                          |       |
| 1007 | Does the stove or cooking room have a chimney?                                          | 1 = yes<br>2 = No                                                                                                                                                                                                                                                                                                | _ _ _ |
| 1008 | What type of fuel or energy source is used in this cook stove?                          | 1 = Alcohol/ethanol<br>2 = Gasoline/diesel<br>3 = Kerosene/paraffin<br>4 = Coal/lignite<br>5 = Charcoal<br>6 = Wood<br>7 = Straw/shrubs/grass<br>8 = Agricultural crop<br>9 = Animal dung/waste<br>10 = Processed biomass (pellets) or woodchips<br>11 = Garbage/plastic<br>12 = Sawdust<br>96 = Other (specify) | _ _ _ |
| 1009 | Do you have a confined space (beret/gata) to keep livestock?                            | 1 = Yes<br>0 = No<br>96 = Not applicable                                                                                                                                                                                                                                                                         | _     |
| 1010 | Do you keep poultry in cages/confined systems (kote)?                                   | 1 = Yes<br>0 = No<br>96 = Not applicable                                                                                                                                                                                                                                                                         | _     |
| 1011 | What do you think are the activities before which you should wash your hands with soap? | For each mentioned: <b>1=Yes 0=No</b>                                                                                                                                                                                                                                                                            |       |
| 1012 |                                                                                         | Before preparing food                                                                                                                                                                                                                                                                                            | _     |
| 1013 |                                                                                         | Before touching or eating food                                                                                                                                                                                                                                                                                   | _     |
| 1014 |                                                                                         | Before feeding a child or other person                                                                                                                                                                                                                                                                           | _     |
| 1015 | <b>DO NOT PROMPT.</b>                                                                   | Praying                                                                                                                                                                                                                                                                                                          | _     |
| 1016 |                                                                                         | Don't know                                                                                                                                                                                                                                                                                                       | _     |
| 1017 | What do you think are the activities after which you should wash your hands with soap?  | For each mentioned: <b>1=Yes 0=No</b>                                                                                                                                                                                                                                                                            |       |
| 1018 |                                                                                         | After defecation or urinating                                                                                                                                                                                                                                                                                    | _     |
| 1019 |                                                                                         | After handling animals and their waste                                                                                                                                                                                                                                                                           | _     |
| 1020 |                                                                                         | After housework or fieldwork                                                                                                                                                                                                                                                                                     | _     |
| 1021 | <b>DO NOT PROMPT.</b>                                                                   | After touching pets or handling animals and their waste                                                                                                                                                                                                                                                          | _     |
| 1022 |                                                                                         | After blowing nose or coughing                                                                                                                                                                                                                                                                                   | _     |
| 1023 |                                                                                         | After cleaning a child's bottom                                                                                                                                                                                                                                                                                  | _     |
| 1024 |                                                                                         | None                                                                                                                                                                                                                                                                                                             | _     |
| 1025 | What do you think are the reasons to keep poultry and livestock in a confined space?    | To keep out of house<br> _                                                                                                                                                                                                                                                                                       |       |
| 1026 | For each mentioned: <b>1=Yes 0=No</b>                                                   | To keep away from water source                                                                                                                                                                                                                                                                                   | _     |
| 1027 |                                                                                         | To reduce infectious disease                                                                                                                                                                                                                                                                                     | _     |

1  
2  
3  
4  
5  
6  
7  
8  
9  
10  
11  
12  
13  
14  
15  
16  
17  
18  
19  
20  
21  
22  
23  
24  
25  
26  
27  
28  
29  
30  
31  
32  
33  
34  
35  
36  
37  
38  
39  
40  
41  
42  
43  
44  
45  
46  
47  
48  
49  
50  
51  
52  
53  
54  
55  
56  
57  
58  
59  
60

|      |                       |                              |   |
|------|-----------------------|------------------------------|---|
| 1028 | <b>DO NOT PROMPT.</b> | To protect livestock/poultry | _ |
| 1029 |                       | Other                        |   |

For peer review only

**Module 11: Food fortification (household coverage of fortifiable foods)**

| SN   | Question                                                                                                                                                             | Response                                                                                                                                                                                                                                                           |        |
|------|----------------------------------------------------------------------------------------------------------------------------------------------------------------------|--------------------------------------------------------------------------------------------------------------------------------------------------------------------------------------------------------------------------------------------------------------------|--------|
| 1101 | Does your household use cooking oil to prepare foods or add to foods at home?                                                                                        | 1 = Yes<br>0 = No →Go to 1103                                                                                                                                                                                                                                      | __     |
| 1102 | The last time your household get cooking oil, where did you get it from?                                                                                             | 1=Purchased from market/shop/kiosk/wholesaler/street vendor<br>2= Homemade or obtained from local farm or local small factory/processor...<br><br>3= Received from food aid/social protection program<br>4 = Other (specify): _____<br><br>98= Don't know/remember | __  __ |
| 1103 | Does your household prepare foods using wheat flour at home, such as bread, kita, injera?                                                                            | 1 = Yes<br>0 = No →Go to 1105                                                                                                                                                                                                                                      | __     |
| 1104 | The last time your household get wheat flour, where did you get it from?                                                                                             | 1=Purchased from market/shop/kiosk/wholesaler/street vendor<br>2= Homemade or obtained from local farm or local small factory/processor...<br><br>3= Received from food aid/social protection program<br>4 = Other (specify): _____<br><br>98= Don't know/remember | __  __ |
| 1105 | I would like to check whether the salt used in your household is iodized. May I have a sample of the salt used to cook meals in your household? Test salt for iodine | 1=Iodine present<br>2= No iodine<br>3= Household uses salt but there is no salt in household<br>4= Household does not use salt<br>5= Salt not tested, specify reason_____                                                                                          | __     |
| 1106 | The last time your household get salt, where did you get it from?                                                                                                    | 1=Purchased from market/shop/kiosk/wholesaler/street vendor<br>2= Homemade or obtained from local farm or local small factory/processor...<br><br>3= Received from food aid/social protection program<br>98= Don't know/remember                                   | __  __ |

1  
2  
3  
4  
5  
6  
7  
8  
9  
10  
11  
12  
13  
14  
15  
16  
17  
18  
19  
20  
21  
22  
23  
24  
25  
26  
27  
28  
29  
30  
31  
32  
33  
34  
35  
36  
37  
38  
39  
40  
41  
42  
43  
44  
45  
46  
47  
48  
49  
50  
51  
52  
53  
54  
55  
56  
57  
58  
59  
60

|  |  |                             |  |
|--|--|-----------------------------|--|
|  |  | 99 = Other (specify): _____ |  |
|--|--|-----------------------------|--|

For peer review only

## Module 12 – Agriculture practices

| About the household |                                                                                                                                                                                                  |                                                                                                                         |         |
|---------------------|--------------------------------------------------------------------------------------------------------------------------------------------------------------------------------------------------|-------------------------------------------------------------------------------------------------------------------------|---------|
| 1201                | Does any member of the household own any agricultural land (purchased or own?)                                                                                                                   | 1 = Yes<br>0 = No ( <b>Go to 1212</b> )                                                                                 | _       |
| 1202                | How many hectares of agricultural land do members of this household own?<br><br><i>Note: Convert local land measurement unit into hector after discussing with agriculture focal person/AEW.</i> | Enter total number of hectares (If less than 1, Enter in decimals (example 0.5)<br>Enter 9999 if hectares are not known | _ _ _ _ |
| 1203                | In the past major growing season (Meher) and minor growing (Belg) season, not including the current season, did you work on the family farm?                                                     | 1 = Yes<br>0 = No ( <b>Go to 1211</b> )                                                                                 | _       |
|                     | What sort of work did you do on the family farm?                                                                                                                                                 | 1 = Yes 0 = No                                                                                                          |         |
| 1204                | READ THE LIST                                                                                                                                                                                    | 1 = Home (kitchen) gardening                                                                                            | _       |
| 1205                |                                                                                                                                                                                                  | 2 = Fieldwork                                                                                                           | _       |
| 1206                |                                                                                                                                                                                                  | 3 = Cash crop farming                                                                                                   | _       |
| 1207                |                                                                                                                                                                                                  | 4 = Producing dairy                                                                                                     | _       |
| 1208                |                                                                                                                                                                                                  | 5 = Rearing poultry                                                                                                     | _       |
| 1209                |                                                                                                                                                                                                  | 6 = Raising livestock                                                                                                   | _       |
| 1210                |                                                                                                                                                                                                  | 7 = Fishpond/ aquaculture                                                                                               | _       |
| 1210                |                                                                                                                                                                                                  | 99 = Other .....                                                                                                        | _       |
| 1211                | Does this household own any livestock, herds, other farm animals, or poultry?                                                                                                                    | 1 = Yes<br>0 = No → <b>Go to 1221</b>                                                                                   | _       |
|                     | How many of the following animals do this household own?                                                                                                                                         | For each: Enter number. <b>If none, enter 0</b>                                                                         |         |
| 1212                | Chickens                                                                                                                                                                                         | _ _ _ _                                                                                                                 |         |
| 1213                | Goats                                                                                                                                                                                            | _ _ _ _                                                                                                                 |         |
| 1214                | Sheep                                                                                                                                                                                            | _ _ _ _                                                                                                                 |         |
| 1215                | Donkeys                                                                                                                                                                                          | _ _ _ _                                                                                                                 |         |
| 1216                | Horses                                                                                                                                                                                           | _ _ _ _                                                                                                                 |         |
| 1217                | Mules                                                                                                                                                                                            | _ _ _ _                                                                                                                 |         |
| 1218                | Camels                                                                                                                                                                                           | _ _ _ _                                                                                                                 |         |
| 1219                | Milk cows                                                                                                                                                                                        | _ _ _ _                                                                                                                 |         |
| 1220                | Oxen                                                                                                                                                                                             | _ _ _ _                                                                                                                 |         |

In the past 2 growing seasons (Meher and Belg), not including the current season, please describe all the crops (cereals, legumes, vegetables, fruits, seeds, and other crops) grown on your household farm.

Please also describe all animal source foods (meat, eggs, milk, dairy, fish, other) that you have produced on your household farm in same period.

Write down all crops and animals mentioned by the respondent. When the respondent has finished, probe for crops and animal source foods not mentioned. Then ask about production/yields in the relevant units. Ask the respondent to estimate the amount of the total production that went to sales, food consumption, and storage/losses/other uses.

|      | Group            | Crop                | Did HH cultivate crop?<br>1 = yes<br>0 = No | Season<br>1=Meher<br>2=Belg<br>3=Both | Amount | During the previous Major seasons (Meher) and Minor season (Belg) not including the current season |          |                                            |
|------|------------------|---------------------|---------------------------------------------|---------------------------------------|--------|----------------------------------------------------------------------------------------------------|----------|--------------------------------------------|
|      |                  |                     |                                             |                                       |        | Sold                                                                                               | Consumed | Storage, losses, animal feed or other uses |
| 1221 | Staples          | Maize               | _                                           |                                       | _      | _ _ _                                                                                              | _ _ _    | _ _ _                                      |
| 1222 |                  | Teff                | _                                           |                                       | _      | _ _ _                                                                                              | _ _ _    | _ _ _                                      |
| 1223 |                  | Wheat               | _                                           |                                       | _      | _ _ _                                                                                              | _ _ _    | _ _ _                                      |
| 1224 |                  | Barley              | _                                           |                                       | _      | _ _ _                                                                                              | _ _ _    | _ _ _                                      |
| 1225 |                  | Sorghum             | _                                           |                                       | _      | _ _ _                                                                                              | _ _ _    | _ _ _                                      |
| 1226 |                  | Millet              | _                                           |                                       | _      | _ _ _                                                                                              | _ _ _    | _ _ _                                      |
| 1227 |                  | Rice                | _                                           |                                       | _      | _ _ _                                                                                              | _ _ _    | _ _ _                                      |
| 1228 |                  | Emmer wheat (oaths) | _                                           |                                       | _      | _ _ _                                                                                              | _ _ _    | _ _ _                                      |
| 1229 |                  | Other cereals       | _                                           |                                       | _      | _ _ _                                                                                              | _ _ _    | _ _ _                                      |
| 1230 | Pulses (legumes) | Bean                | _                                           |                                       | _      | _ _ _                                                                                              | _ _ _    | _ _ _                                      |
| 1231 |                  | Haricot bean        | _                                           |                                       | _      | _ _ _                                                                                              | _ _ _    | _ _ _                                      |
| 1232 |                  | Lentil (Miser)      | _                                           |                                       | _      | _ _ _                                                                                              | _ _ _    | _ _ _                                      |
| 1233 |                  | Grass pea (guaya)   | _                                           |                                       | _      | _ _ _                                                                                              | _ _ _    | _ _ _                                      |
| 1234 |                  | Chickpea            | _                                           |                                       | _      | _ _ _                                                                                              | _ _ _    | _ _ _                                      |
| 1235 |                  | Field pea (Ater)    | _                                           |                                       | _      | _ _ _                                                                                              | _ _ _    | _ _ _                                      |
| 1236 |                  | Soya bean           | _                                           |                                       | _      | _ _ _                                                                                              | _ _ _    | _ _ _                                      |



|      |                                    |                                      |         |   |     |     |     |     |
|------|------------------------------------|--------------------------------------|---------|---|-----|-----|-----|-----|
| 1237 |                                    | Other legumes                        | _       |   | _   | _ _ | _ _ | _ _ |
| 1238 | Oil Crops                          | Niger seed (Nug)                     | _       |   | _   | _ _ | _ _ | _ _ |
| 1239 |                                    | Sunflower                            | _       |   | _   | _ _ | _ _ | _ _ |
| 1240 |                                    | Sesame                               | _       |   | _   | _ _ | _ _ | _ _ |
| 1241 |                                    | Linseed                              | _       |   | _   | _ _ | _ _ | _ _ |
| 1242 |                                    | Rapeseed (Gomenzer)                  | _       |   | _   | _ _ | _ _ | _ _ |
| 1243 |                                    | Lupine (Gibto)                       | _       |   | _   | _ _ | _ _ | _ _ |
| 1244 |                                    | Nuts                                 |         |   |     | _ _ | _ _ | _ _ |
| 1245 |                                    | Other oil crops                      | _       |   | _   | _ _ | _ _ | _ _ |
| 1246 |                                    | Root crops/<br>tubers/<br>vegetables | Cassava | _ |     | _   | _ _ | _ _ |
| 1247 | Enset                              |                                      | _       |   | _   | _ _ | _ _ | _ _ |
| 1248 | Irish potato                       |                                      | _       |   | _   | _ _ | _ _ | _ _ |
| 1249 | Sweet potato                       |                                      | _       |   | _   | _ _ | _ _ | _ _ |
| 1250 | Sweet potato - orange flesh        |                                      | _       |   | _   | _ _ | _ _ | _ _ |
| 1251 | Onion                              |                                      | _       |   | _   | _ _ | _ _ | _ _ |
| 1252 | Pepper                             |                                      | _       |   | _   | _ _ | _ _ | _ _ |
| 1253 | Tomato                             |                                      | _       |   | _   | _ _ | _ _ | _ _ |
| 1254 | Cabbage                            |                                      | _       |   | _   | _ _ | _ _ | _ _ |
| 1255 | Other light green leafy vegetables |                                      | _       |   | _   | _ _ | _ _ | _ _ |
| 1256 | Kale                               |                                      | _       |   | _   | _ _ | _ _ | _ _ |
| 1257 | Other dark green leafy vegetables  |                                      | _       |   | _   | _ _ | _ _ | _ _ |
| 1258 | Carrot                             |                                      | _       |   | _   | _ _ | _ _ | _ _ |
| 1259 | Other roots or tubers              |                                      | _       |   | _   | _ _ | _ _ | _ _ |
| 1260 | Other vegetables                   | _                                    |         | _ | _ _ | _ _ | _ _ |     |
| 1261 | Perennial crops/<br>fruits         | Coffee                               | _       |   | _   | _ _ | _ _ | _ _ |
| 1262 |                                    | Chat (khat)                          | _       |   | _   | _ _ | _ _ | _ _ |
| 1263 |                                    | Banana                               | _       |   | _   | _ _ | _ _ | _ _ |
| 1264 |                                    | Orange                               | _       |   | _   | _ _ | _ _ | _ _ |
| 1265 |                                    | Mango                                | _       |   | _   | _ _ | _ _ | _ _ |
| 1266 |                                    | Hop                                  | _       |   | _   | _ _ | _ _ | _ _ |

1  
2  
3  
4  
5  
6  
7  
8  
9  
10  
11  
12  
13  
14  
15  
16  
17  
18  
19  
20  
21  
22  
23  
24  
25  
26  
27  
28  
29  
30  
31  
32  
33  
34  
35  
36  
37  
38  
39  
40  
41  
42  
43  
44  
45  
46  
47  
48  
49  
50  
51  
52  
53  
54  
55  
56  
57  
58  
59  
60

|      |                             |   |  |   |        |        |        |
|------|-----------------------------|---|--|---|--------|--------|--------|
|      | (Gesho)                     |   |  |   |        |        |        |
| 1267 | Avocado                     | _ |  | _ | _    _ | _    _ | _    _ |
| 1268 | Lemon                       | _ |  | _ | _    _ | _    _ | _    _ |
| 1269 | Papaya                      | _ |  | _ | _    _ | _    _ | _    _ |
| 1270 | Guava                       | _ |  | _ | _    _ | _    _ | _    _ |
| 1271 | Water<br>Melon              | _ |  | _ | _    _ | _    _ | _    _ |
| 1272 | Tirngo fruit                | _ |  | _ | _    _ | _    _ | _    _ |
| 1273 | Other<br>perennial<br>crops | _ |  | _ | _    _ | _    _ | _    _ |
| 1274 | Other fruits                | _ |  | _ | _    _ | _    _ | _    _ |

For peer review only

|      | Group       | Animal source food (unit)      | Does HH produce?<br><b>1=yes</b><br><b>0=no</b><br><i>(If no, skip to the next item)</i> | Amount | During the previous Major seasons (Meher) and Minor season (Belg) not including the current season |           |          |                                        |
|------|-------------|--------------------------------|------------------------------------------------------------------------------------------|--------|----------------------------------------------------------------------------------------------------|-----------|----------|----------------------------------------|
|      |             |                                |                                                                                          |        | Season<br>1=Meher<br>2=Belg<br>3=Both                                                              | How much? |          |                                        |
|      |             |                                |                                                                                          |        |                                                                                                    | Sold      | Consumed | Storage, losses, animal feed or others |
| 1275 | All         | Chicken eggs                   |                                                                                          | _      | _                                                                                                  | _ _       | _ _      | _ _                                    |
| 1276 |             | Chicken meat                   |                                                                                          | _      | _                                                                                                  | _ _       | _ _      | _ _                                    |
| 1277 |             | Goat milk                      |                                                                                          | _      | _                                                                                                  | _ _       | _ _      | _ _                                    |
| 1278 |             | Goat meat                      |                                                                                          | _      | _                                                                                                  | _ _       | _ _      | _ _                                    |
| 1279 |             | Camel milk                     |                                                                                          | _      | _                                                                                                  | _ _       | _ _      | _ _                                    |
| 1280 |             | Sheep meat                     |                                                                                          | _      | _                                                                                                  | _ _       | _ _      | _ _                                    |
| 1281 |             | Cow milk                       |                                                                                          | _      | _                                                                                                  | _ _       | _ _      | _ _                                    |
| 1282 |             | Cow other dairy                |                                                                                          | _      | _                                                                                                  | _ _       | _ _      | _ _                                    |
| 1283 |             | Beef                           |                                                                                          | _      | _                                                                                                  | _ _       | _ _      | _ _                                    |
| 1284 |             | Other meat (e.g. camel, horse) |                                                                                          | _      | _                                                                                                  | _ _       | _ _      | _ _                                    |
| 1285 | Farmed fish |                                | _                                                                                        | _      | _ _                                                                                                | _ _       | _ _      |                                        |

**Module 13: Household food insecurity**

| Now I would like to ask you some questions about food. During the last 12 MONTHS, was there a time when: |                                                                                                                                                                                              |                                               |       |
|----------------------------------------------------------------------------------------------------------|----------------------------------------------------------------------------------------------------------------------------------------------------------------------------------------------|-----------------------------------------------|-------|
| SN                                                                                                       | Questions                                                                                                                                                                                    | Answers                                       |       |
| 1301                                                                                                     | You or others in your household worried about not having enough food to eat because of a lack of money or other resources?                                                                   | 1=Yes<br>0= No<br>98=Don't know<br>97=Refused | _ _ _ |
| 1302                                                                                                     | Still thinking about the last 12 MONTHS, was there a time when you or others in your household were unable to eat healthy and nutritious food because of a lack of money or other resources? | 1=Yes<br>0= No<br>98=Don't know<br>97=Refused | _ _ _ |
| 1303                                                                                                     | Was there a time when you or others in your household ate only a few kinds of foods because of a lack of money or other resources?                                                           | 1=Yes<br>0= No<br>98=Don't know<br>97=Refused | _ _ _ |
| 1304                                                                                                     | Was there a time when you or others in your household had to skip a meal because there was not enough money or other resources to get food?                                                  | 1=Yes<br>0= No<br>98=Don't know<br>97=Refused | _ _ _ |
| 1305                                                                                                     | Still thinking about the last 12 MONTHS, was there a time when you or others in your household ate less than you thought you should because of a lack of money or other resources?           | 1=Yes<br>0= No<br>98=Don't know<br>97=Refused | _ _ _ |
| 1306                                                                                                     | Was there a time when your household ran out of food because of a lack of money or other resources?                                                                                          | 1=Yes<br>0= No<br>98=Don't know<br>97=Refused | _ _ _ |
| 1307                                                                                                     | Was there a time when you or others in your household were hungry but did not eat because there was not enough money or other resources for food?                                            | 1=Yes<br>0= No<br>98=Don't know<br>97=Refused | _ _ _ |
| 1308                                                                                                     | Was there a time when you or others in your household went without eating for a whole day because of a lack of money or other resources?                                                     | 1=Yes<br>0= No<br>98=Don't know<br>97=Refused | _ _ _ |

## Module 14: Employment and social protection

| S.N. | Questions                                                                                                                                                                                                                                           | Response                                                                                                                                                                                                                                                                                                                                                                                                          |       |
|------|-----------------------------------------------------------------------------------------------------------------------------------------------------------------------------------------------------------------------------------------------------|-------------------------------------------------------------------------------------------------------------------------------------------------------------------------------------------------------------------------------------------------------------------------------------------------------------------------------------------------------------------------------------------------------------------|-------|
| 1401 | <p>Since last year, what has been the main livelihood or income source of the HH?</p> <p><b>(DO NOT READ LIST. PROBE FOR ONE RESPONSE)</b></p>                                                                                                      | <p>1 = Sale of self-produced horticulture crops<br/>           2 = horticulture crops Sale of self-produced field crops<br/>           3 = Own business (including commerce, livestock rearing)<br/>           4 = Wage employment<br/>           5 = Remittances<br/>           6 = Property income<br/>           7 = Government transfers/NGO support<br/>           8 = Pension<br/>           99 = Other</p> | _ _ _ |
| 1402 | <p>Since last year, have there been other livelihood or income sources for the HH?</p> <p><b>(DO NOT READ LIST. PROBE FOR ALL RESPONSES)</b></p>                                                                                                    | <p>1 = Sale of self-produced horticulture crops<br/>           2 = horticulture crops Sale of self-produced field crops<br/>           3 = Own business (including commerce, livestock rearing)<br/>           4 = Wage employment<br/>           5 = Remittances<br/>           6 = Property income<br/>           7 = Government transfers/NGO support<br/>           8 = Pension<br/>           99 = Other</p> | _ _ _ |
| 1403 | <p>Since last year, did anyone in your HH receive any kind of food or cash assistance from the government, NGO, or other agencies? <i>Clarify: This is not formal employment or pension. However, it may or may not be conditional on work.</i></p> | <p>1 = Yes<br/>           0 = No<br/>           98 = Don't know</p>                                                                                                                                                                                                                                                                                                                                               | _ _ _ |
| 1404 | <p>Since last year, which members of this HH were targeted to receive this support?</p>                                                                                                                                                             | <p>1 = All HH members<br/>           2 = Specific HH members<br/>           98 = Don't know</p>                                                                                                                                                                                                                                                                                                                   | _ _ _ |
| 1405 | <p>Which specific HH members received food or cash assistance?<br/> <i>Clarify: This includes children whose parents receive cash on their behalf.</i></p>                                                                                          | <p>Link this back to the HH roster and have interviewer select names.<br/>           98 = Don't know</p>                                                                                                                                                                                                                                                                                                          | _ _ _ |
| 1406 | <p>Which of these categories apply to the persons who received food or cash assistance?<br/> <b>(READ RESPONSES ALOUD. SELECT ALL THAT APPLY)</b></p>                                                                                               | <p>1 = Pregnant women<br/>           2 = Lactating women<br/>           3 = Children under 5 years<br/>           4 = Elderly<br/>           5 = Disabled person<br/>           6 = None of the above</p>                                                                                                                                                                                                         | _ _ _ |
| 1407 | <p>Since last year, which food or social assistance program did members of the HH receive support from? <b>(DO NOT READ LIST ALOUD. PROBE FOR ALL RESPONSES)</b></p>                                                                                | <p>1 = PSNP<br/>           2 = Community Care Coalition<br/>           3 = Other assistance program<br/>           98 = Don't know</p>                                                                                                                                                                                                                                                                            | _ _ _ |
| 1408 | <p>Since last year, what was the form of assistance that members of your HH received from these programs: food, cash or both food and cash?</p>                                                                                                     | <p>1 = Cash only transfer<br/>           2 = Food only transfer<br/>           3 = Cash and food mix<br/>           99 = Other<br/>           98 = Don't know</p>                                                                                                                                                                                                                                                 | _ _ _ |

|    |      |                                                                                                           |                                                                                         |       |
|----|------|-----------------------------------------------------------------------------------------------------------|-----------------------------------------------------------------------------------------|-------|
| 1  | 1409 | Is this HH currently receiving food or cash?                                                              | 1 = Yes<br>0 = No<br>98 = Don't know                                                    | _ _ _ |
| 2  |      |                                                                                                           |                                                                                         |       |
| 3  |      |                                                                                                           |                                                                                         |       |
| 4  | 1410 | Since last year, how has your HH used the food received?<br>(READ RESPONSES ALOUD. SELECT ALL THAT APPLY) | 1 = HH consumption<br>2 = Sold food for cash<br>3 = Other activities<br>98 = Don't know |       |
| 5  |      |                                                                                                           |                                                                                         |       |
| 6  |      |                                                                                                           |                                                                                         |       |
| 7  |      |                                                                                                           |                                                                                         |       |
| 8  |      |                                                                                                           |                                                                                         |       |
| 9  |      |                                                                                                           |                                                                                         |       |
| 10 |      |                                                                                                           |                                                                                         |       |
| 11 |      |                                                                                                           |                                                                                         |       |
| 12 |      |                                                                                                           |                                                                                         |       |
| 13 |      |                                                                                                           |                                                                                         |       |
| 14 |      |                                                                                                           |                                                                                         |       |
| 15 |      |                                                                                                           |                                                                                         |       |
| 16 |      |                                                                                                           |                                                                                         |       |
| 17 |      |                                                                                                           |                                                                                         |       |
| 18 |      |                                                                                                           |                                                                                         |       |
| 19 |      |                                                                                                           |                                                                                         |       |
| 20 |      |                                                                                                           |                                                                                         |       |
| 21 |      |                                                                                                           |                                                                                         |       |
| 22 |      |                                                                                                           |                                                                                         |       |
| 23 |      |                                                                                                           |                                                                                         |       |
| 24 |      |                                                                                                           |                                                                                         |       |
| 25 |      |                                                                                                           |                                                                                         |       |
| 26 |      |                                                                                                           |                                                                                         |       |
| 27 |      |                                                                                                           |                                                                                         |       |
| 28 |      |                                                                                                           |                                                                                         |       |
| 29 |      |                                                                                                           |                                                                                         |       |
| 30 |      |                                                                                                           |                                                                                         |       |
| 31 |      |                                                                                                           |                                                                                         |       |
| 32 |      |                                                                                                           |                                                                                         |       |
| 33 |      |                                                                                                           |                                                                                         |       |
| 34 |      |                                                                                                           |                                                                                         |       |
| 35 |      |                                                                                                           |                                                                                         |       |
| 36 |      |                                                                                                           |                                                                                         |       |
| 37 |      |                                                                                                           |                                                                                         |       |
| 38 |      |                                                                                                           |                                                                                         |       |
| 39 |      |                                                                                                           |                                                                                         |       |
| 40 |      |                                                                                                           |                                                                                         |       |
| 41 |      |                                                                                                           |                                                                                         |       |
| 42 |      |                                                                                                           |                                                                                         |       |
| 43 |      |                                                                                                           |                                                                                         |       |
| 44 |      |                                                                                                           |                                                                                         |       |
| 45 |      |                                                                                                           |                                                                                         |       |
| 46 |      |                                                                                                           |                                                                                         |       |
| 47 |      |                                                                                                           |                                                                                         |       |
| 48 |      |                                                                                                           |                                                                                         |       |
| 49 |      |                                                                                                           |                                                                                         |       |
| 50 |      |                                                                                                           |                                                                                         |       |
| 51 |      |                                                                                                           |                                                                                         |       |
| 52 |      |                                                                                                           |                                                                                         |       |
| 53 |      |                                                                                                           |                                                                                         |       |
| 54 |      |                                                                                                           |                                                                                         |       |
| 55 |      |                                                                                                           |                                                                                         |       |
| 56 |      |                                                                                                           |                                                                                         |       |
| 57 |      |                                                                                                           |                                                                                         |       |
| 58 |      |                                                                                                           |                                                                                         |       |
| 59 |      |                                                                                                           |                                                                                         |       |
| 60 |      |                                                                                                           |                                                                                         |       |

For peer review only

|       |                                                                                                                                                                                        |                                                                                                                                                                                                                                                                                                                                                                  |
|-------|----------------------------------------------------------------------------------------------------------------------------------------------------------------------------------------|------------------------------------------------------------------------------------------------------------------------------------------------------------------------------------------------------------------------------------------------------------------------------------------------------------------------------------------------------------------|
| 1501. | <p>How do you preserve soil fertility?</p> <p><b>[Multiple answer is allowed! Do not read the choices. Listen and mark the one they mention]</b></p>                                   | <p>1 = Fertilization (Chemicals, animal manure, green manure etc)</p> <p>2 = Crop rotation (Cultivation of a series of dissimilar types of crops in the same area in sequential seasons)</p> <p>3=Intercropping (Cultivation of two or more dissimilar types of crops in the same area in the same season)</p> <p>4=Tillage</p> <p>99=Other (specify): .....</p> |
| 1502. | <p>Do you apply fertilizers?</p>                                                                                                                                                       | <p>1= Yes</p> <p>0= No (Go to 1506)</p>                                                                                                                                                                                                                                                                                                                          |
| 1503. | <p>Which kinds of fertilizers do you use more often?</p>                                                                                                                               | <p>1= Chemical fertilizers</p> <p>2 = Organic fertilizers (non-chemicals like animal manure, green manure, compost, etc.) (Go to→1505)</p>                                                                                                                                                                                                                       |
| 1504. | <p>Which chemical fertilizers are used most often, can you specify the type/name?</p>                                                                                                  | <p>1 = UREA</p> <p>2 = DAP</p> <p>3= NPS</p> <p>98= Don't know</p> <p>99= Other (specify): .....</p>                                                                                                                                                                                                                                                             |
| 1505. | <p>Which organic fertilizers are used more often, can you specify the type?</p>                                                                                                        | <p>1 = Livestock manure</p> <p>2 = Poultry manure</p> <p>99=Other (specify) .....</p>                                                                                                                                                                                                                                                                            |
| 1506. | <p>What is the most dominant cereals/crop you produce on your farm?</p> <p><b>[Only one answer is allowed! Do not read the choices. Listen, mark/specify the one they mention]</b></p> | <p>1 = Wheat</p> <p>2 = Teff</p> <p>3 = Maize</p> <p>99= Other (Specify): .....</p>                                                                                                                                                                                                                                                                              |
| 1507. | <p>How far is your agricultural land from your house?</p> <p><b>[In case they own many farms, Consider only the one with the dominant crop]</b></p>                                    | <p>1= within 500 meter radius</p> <p>2= 500 -1000 meter radius</p> <p>3= 1000 - 3000 meter radius</p> <p>4= More than 3000 meter</p>                                                                                                                                                                                                                             |

1 **Module 15: Soil information questionnaire**

2  
3 **Observational checklist for soil sampling**

4  
5  
6  
7  
8  
9  
10  
11  
12  
13  
14  
15  
16  
17  
18  
19  
20  
21  
22  
23  
24  
25  
26  
27  
28  
29  
30  
31  
32  
33  
34  
35  
36  
37  
38  
39  
40  
41  
42  
43  
44  
45  
46  
47  
48  
49  
50  
51  
52  
53  
54  
55  
56  
57  
58  
59  
60

For peer review only



|    |                                                                                             |
|----|---------------------------------------------------------------------------------------------|
| 1  | Region                                                                                      |
| 2  | Zone                                                                                        |
| 3  | Woreda                                                                                      |
| 4  | Kebele                                                                                      |
| 5  | Gote Code                                                                                   |
| 6  | Household Code                                                                              |
| 7  | Sample code .....                                                                           |
| 8  |                                                                                             |
| 9  |                                                                                             |
| 10 |                                                                                             |
| 11 | <b>7 Crop history</b>                                                                       |
| 12 | 7.1 Last two-year crop (Please, specify the crop harvested in 2011, growing season) .....   |
| 13 | 7.2 Last crop (Please, specify the crop harvested from the previous growing season) .....   |
| 14 | 7.3 Crop to be planted for the current season.....                                          |
| 15 | 7.4 Please write the intended planting dates (Year and Month) .....,                        |
| 16 | 7.5 When was the <b>last time</b> the agricultural field gets tilled?                       |
| 17 | 1 = 0 to 3 months ago                                                                       |
| 18 | 2 = 3 to 6 months ago                                                                       |
| 19 | 1 = 6 to 12 months ago                                                                      |
| 20 | 2 = before a year                                                                           |
| 21 |                                                                                             |
| 22 |                                                                                             |
| 23 |                                                                                             |
| 24 |                                                                                             |
| 25 |                                                                                             |
| 26 |                                                                                             |
| 27 |                                                                                             |
| 28 | <b>8 Fertilizer utilization</b>                                                             |
| 29 | 8.1 Which fertilizer is applied                                                             |
| 30 | 1 = Chemical fertilizer                                                                     |
| 31 | 2 = Organic fertilizer ( <b>Go to 8.4</b> )                                                 |
| 32 | 3 = Both 1&2                                                                                |
| 33 | 4 = Fertilizer not applied ( <b>Go to 9</b> )                                               |
| 34 |                                                                                             |
| 35 |                                                                                             |
| 36 |                                                                                             |
| 37 |                                                                                             |
| 38 | 8.2 Which Chemical fertilizer is applied                                                    |
| 39 | 1 = UREA                                                                                    |
| 40 | 2 = DAP                                                                                     |
| 41 | 3 = NPS                                                                                     |
| 42 | 4 = Other, please specify.....                                                              |
| 43 |                                                                                             |
| 44 |                                                                                             |
| 45 |                                                                                             |
| 46 | 8.3 Please write the last date (Year and Month) you applied chemical fertilizer?.....       |
| 47 | 8.4 Which Organic fertilizer is applied                                                     |
| 48 | 1 = Animal Manure                                                                           |
| 49 | 2 = Green Manure                                                                            |
| 50 | 3 = Compost                                                                                 |
| 51 | 4 = Other, please specify.....                                                              |
| 52 |                                                                                             |
| 53 |                                                                                             |
| 54 |                                                                                             |
| 55 | 8.5 Please write the <b>last date</b> (Year and Month) you applied organic fertilizer?..... |
| 56 |                                                                                             |
| 57 |                                                                                             |
| 58 |                                                                                             |
| 59 | <b>9 Soil characteristics</b>                                                               |
| 60 |                                                                                             |

|    |     |                                                                                                           |
|----|-----|-----------------------------------------------------------------------------------------------------------|
| 1  |     |                                                                                                           |
| 2  | 9.1 | Observation: What is the colour of the soil you are about to sample                                       |
| 3  |     | 1 = Dark brown/Black                                                                                      |
| 4  |     | 2 = Red                                                                                                   |
| 5  |     | 3 = Grey                                                                                                  |
| 6  |     | 4 = Other, please specify.....                                                                            |
| 7  |     |                                                                                                           |
| 8  | 9.1 | Observation: Field area landscape                                                                         |
| 9  |     | 1 = plains/level grounds                                                                                  |
| 10 |     | 2 = Sloppy/Inclined                                                                                       |
| 11 | 9.4 | Observation: Is there a standing crop on the sampling field or to the nearby farmland.                    |
| 12 |     | 1 = Yes                                                                                                   |
| 13 |     | 2 = No                                                                                                    |
| 14 |     |                                                                                                           |
| 15 | 9.3 | Observation: Is sampling field tilled/ is it being tilled at the time of sampling.                        |
| 16 |     | 1 = Yes                                                                                                   |
| 17 |     | 2 = No                                                                                                    |
| 18 |     |                                                                                                           |
| 19 | 10  | Distance of the farmland to the nearby houses                                                             |
| 20 |     | 1 = below 100meter                                                                                        |
| 21 |     | 2 = 100 to 500meter                                                                                       |
| 22 |     | 3 = 500 to 1000meter                                                                                      |
| 23 |     | 4 = More than 1000meter                                                                                   |
| 24 |     |                                                                                                           |
| 25 | 11  | Please take picture for the surrounding environment i.e., plot, houses, anything permanent or even moving |
| 26 |     | cattle                                                                                                    |
| 27 | 12  | Please capture GPS for the sampled farmland                                                               |
| 28 | 13  | Name of sample collector.....                                                                             |
| 29 |     | LIST ANY ABNORMAL CONDITIONS OR SPECIFIC INFORMATION DESIRED:                                             |
| 30 |     |                                                                                                           |
| 31 |     |                                                                                                           |
| 32 |     |                                                                                                           |
| 33 |     |                                                                                                           |
| 34 |     |                                                                                                           |
| 35 |     |                                                                                                           |
| 36 |     |                                                                                                           |
| 37 |     |                                                                                                           |
| 38 |     |                                                                                                           |
| 39 |     |                                                                                                           |
| 40 |     |                                                                                                           |
| 41 |     |                                                                                                           |
| 42 |     |                                                                                                           |
| 43 |     |                                                                                                           |
| 44 |     |                                                                                                           |
| 45 |     |                                                                                                           |
| 46 |     |                                                                                                           |
| 47 |     |                                                                                                           |
| 48 |     |                                                                                                           |
| 49 |     |                                                                                                           |
| 50 |     |                                                                                                           |
| 51 |     |                                                                                                           |
| 52 |     |                                                                                                           |
| 53 |     |                                                                                                           |
| 54 |     |                                                                                                           |
| 55 |     |                                                                                                           |
| 56 |     |                                                                                                           |
| 57 |     |                                                                                                           |
| 58 |     |                                                                                                           |
| 59 |     |                                                                                                           |
| 60 |     |                                                                                                           |

**Module 16: A Dietary assessment questionnaire**

**Note for the data collectors:** Among the household members, this module questionnaire is to be filled for the child under-five years of age and women of the reproductive age in the household.

**Part 1: Before 24-hr recall**

| 24-hour dietary recall                                                                  |                                                                          |                                                  |        |
|-----------------------------------------------------------------------------------------|--------------------------------------------------------------------------|--------------------------------------------------|--------|
| EA code  _ _ _  Household code  _ _  Line Number  _ _  Child ID  _ _                    |                                                                          |                                                  |        |
| Unique ID Woman:  _ _ _ _ _ _ _  Unique ID Child:  _ _ _ _ _ _ _ _ _ _ _                |                                                                          |                                                  |        |
| Interview Date: Date - _/ _/ _ _ Day - 01=Mon 02=Tue 03=Wed 04=Thu 05=Fri 06=Sat 07=Sun |                                                                          |                                                  |        |
| Date of food intake - _/ _/ _ _                                                         |                                                                          |                                                  |        |
|                                                                                         | Question                                                                 | Coding category                                  | skip   |
| 1.                                                                                      | Enumerator Code:                                                         | _____                                            |        |
| 2.                                                                                      | For which target group is the recall being done?                         | 0. Woman 1. Child                                |        |
| 3.                                                                                      | Recall number                                                            | 0. Recall 1<br>1. Recall 2                       |        |
| 4.                                                                                      | Name of the woman interviewed                                            | _____                                            |        |
| 5.                                                                                      | Age of the woman (in complete years)                                     | Age in years (_____)                             |        |
| 6.                                                                                      | Name of child                                                            | _____                                            |        |
| 7.                                                                                      | Date of birth (DOB): Use Ethiopian calendar                              | _ _ _ / _ _ /20 _ _                              |        |
| 8.                                                                                      | Age of the child (in complete month)                                     | _____ months                                     |        |
| 9.                                                                                      | Child's sex:                                                             | 0=Male 1= Female                                 |        |
| 10.                                                                                     | Food weighing scale number:                                              | _ _                                              |        |
| 11.                                                                                     | Was yesterday's food intake different from your usual diet?              | 1=Yes 0=No                                       | No →13 |
| 12.                                                                                     | If yes,                                                                  | 1=Holyday/celebration<br>2=I was sick<br>3=Other |        |
| 13.                                                                                     | Was [child name] yesterday's food intake different from your usual diet? | 1=Yes<br>0=No                                    | No →15 |

|                                  |                                                             |                                                  |  |
|----------------------------------|-------------------------------------------------------------|--------------------------------------------------|--|
| 1<br>2<br>3<br>4<br>5            | 14.<br>If yes,                                              | 1=Holyday/celebration<br>2=I was sick<br>3=Other |  |
| 6<br>7<br>8<br>9<br>10           | 15.<br>Did you take medicine/supplement yesterday?          | 1=Yes<br>0=No<br><i>If yes, name:</i> _____      |  |
| 11<br>12<br>13<br>14<br>15<br>16 | 16.<br>Did [child name] take medicine/supplement yesterday? | 1=Yes<br>0=No<br><i>If yes, name:</i> _____      |  |

17  
18  
19  
20  
21  
22  
23  
24  
25  
26  
27  
28  
29  
30  
31  
32  
33  
34  
35  
36  
37  
38  
39  
40  
41  
42  
43  
44  
45  
46  
47  
48  
49  
50  
51  
52  
53  
54  
55  
56  
57  
58  
59  
60

For peer review only

## Procedures to collect the required information

### 1. Pass 1: list all foods and drinks consumed during the 24-hour period.

Now I would like to ask you about the foods and drinks that [YOU/ YOUR CHILD] consumed yesterday from the time you work up until you went to sleep, sunrise yesterday to sunrise today. Please list all foods or drinks you ate, weather you ate or drank them at home or somewhere else. Please think about snacks and small meals as well as main meals.

- 1) "WHAT WAS THE FIRST THING [you/ your child] ATE YESTERDAY AFTER SUNRISE?"
- 2) "WHEN WAS THAT"
- 3) "DID [you/your child] HAVE ANYTHING WITH THAT?"
- 4) "WHAT DID [you/he/she] HAVE?"
- 5) "WHAT IS THE NEXT THING [you/ your child] ATE OR DRANK AND WHEN WAS THAT?"
- 6) REPEAT questions 3-5 until you have a full record for both DAY AND NIGHT
  - a. The reference period is from sunrise yesterday to sunrise this morning. If they wake up at a different time than sunrise, you can use the time from waking up yesterday until waking up today

### 2. Pass 2: get more detail about each food.

- 7) "NOW, PLEASE DESCRIBE EACH FOOD [you/ your child] ATE YESTERDAY"
- 8) "WHAT TYPE WAS IT?"
- 9) "WHERE DID YOU GET IT?"
- 10) "WHAT ARE THE INGREDIENTS?"
  - a. Use standard "probes" (probing questions) to get these details for each food.
- 11) "HOW MUCH DID THIS RECIPE MAKE?" or "WHAT WAS THE TOTAL AMOUNT THIS MADE?"
- 12) "HOW WAS The Recipe PREPARED?"
  - a. Identify the cooking methods used (particularly if raw, fermented, or fried in oil).

### 3. Pass 3: estimate the amount consumed of each food on the list

- 13) "HOW MUCH OF [name the first food] DID [you/ your child] CONSUME?"
  - a. Help the mother remember and **estimate the amount** of each food or recipe that her child ate and that she herself ate.
- 14) "WAS ANY LEFT OVER?"
  - a. If any food is leftover from what the mother served to the child, enter that amount.
- 15) "PLEASE HELP ME ESTIMATE THE AMOUNT OF FOOD YOU ARE OR USED IN THE RECIPE"

Use following portion size estimation method to estimate the amount of food/ingredient eaten or used in a recipe 1. Direct weight (g) 2.Proxy weight (g) 3. Water (g) 4. Number 5. Other (specify).

### 4. Pass 4: verify everything consumed

- a. Quickly read the information back to the respondent, "HAVE I FORGOTTEN TO ADD ANYTHING?"



1  
2  
3  
4  
5  
6  
7  
8  
9  
10  
11  
12  
13  
14  
15  
16  
17  
18  
19  
20  
21  
22  
23  
24  
25  
26  
27  
28  
29  
30  
31  
32  
33  
34  
35  
36  
37  
38  
39  
40  
41  
42  
43  
44  
45  
46  
47  
48  
49  
50  
51  
52  
53  
54  
55  
56  
57  
58  
59  
60

For peer review only

| Food No. | What was the first thing [YOU/ YOUR CHILD] ate or drank after sunrise yesterday? Any else? | Time of meal | Please describe this food / beverage/ ingredient: | How was this prepared ? | Place of preparation | How was the food / Ing. measured | Amount served | Amount left over | Amount eaten | Recipe information       |                              |                                 |                       |
|----------|--------------------------------------------------------------------------------------------|--------------|---------------------------------------------------|-------------------------|----------------------|----------------------------------|---------------|------------------|--------------|--------------------------|------------------------------|---------------------------------|-----------------------|
|          |                                                                                            |              |                                                   |                         |                      |                                  |               |                  |              | State of each ingredient | Cooking method of the recipe | Total amount of recipe prepared | Links to food/ recipe |
| 1        |                                                                                            |              |                                                   |                         |                      |                                  |               |                  |              |                          |                              |                                 |                       |
|          | Ingredient:                                                                                |              | Description                                       |                         |                      |                                  |               |                  |              |                          |                              |                                 |                       |
|          |                                                                                            |              |                                                   |                         | NA                   |                                  |               |                  |              |                          |                              |                                 |                       |
|          |                                                                                            |              |                                                   |                         | NA                   |                                  |               |                  |              |                          |                              |                                 |                       |
|          |                                                                                            |              |                                                   |                         | NA                   |                                  |               |                  |              |                          |                              |                                 |                       |
|          |                                                                                            |              |                                                   |                         | NA                   |                                  |               |                  |              |                          |                              |                                 |                       |
|          |                                                                                            |              |                                                   |                         | NA                   |                                  |               |                  |              |                          |                              |                                 |                       |
| 2        |                                                                                            |              |                                                   |                         |                      |                                  |               |                  |              |                          |                              |                                 |                       |
|          |                                                                                            |              |                                                   |                         | NA                   |                                  |               |                  |              |                          |                              |                                 |                       |
|          |                                                                                            |              |                                                   |                         | NA                   |                                  |               |                  |              |                          |                              |                                 |                       |
|          |                                                                                            |              |                                                   |                         | NA                   |                                  |               |                  |              |                          |                              |                                 |                       |
|          |                                                                                            |              |                                                   |                         | NA                   |                                  |               |                  |              |                          |                              |                                 |                       |
|          |                                                                                            |              |                                                   |                         | NA                   |                                  |               |                  |              |                          |                              |                                 |                       |
| 3        |                                                                                            |              |                                                   |                         |                      |                                  |               |                  |              |                          |                              |                                 |                       |
|          |                                                                                            |              |                                                   |                         | NA                   |                                  |               |                  |              |                          |                              |                                 |                       |
|          |                                                                                            |              |                                                   |                         | NA                   |                                  |               |                  |              |                          |                              |                                 |                       |
|          |                                                                                            |              |                                                   |                         | NA                   |                                  |               |                  |              |                          |                              |                                 |                       |
|          |                                                                                            |              |                                                   |                         | NA                   |                                  |               |                  |              |                          |                              |                                 |                       |
|          |                                                                                            |              |                                                   |                         | NA                   |                                  |               |                  |              |                          |                              |                                 |                       |

Time of meal: 1. Early morning 2. Mid-Morning 3. Noon 4. Afternoon 5. Evening 6. Late evening

Place of preparation: 1. Home 2. Outside home

How was it prepared: 1=raw/ no change/ as purchased; 2=fermented; 3=fried; 04=cooked or boiled – wet heat; 5=baked/ grilled/ broiled – dry heat; 6=local miller; 7=blanched (dipped in boiling water); 8=other



| Food No. | What was the first thing [YOU/ YOUR CHILD] ate or drank after sunrise yesterday? Any else? | Time of meal | Please describe this food / beverage/ ingredient: | How was this prepared ? | Place of preparation | How was the food / Ing. measured | Amount served | Amount left over | Amount eaten | Recipe information       |                              |                                 |                        |
|----------|--------------------------------------------------------------------------------------------|--------------|---------------------------------------------------|-------------------------|----------------------|----------------------------------|---------------|------------------|--------------|--------------------------|------------------------------|---------------------------------|------------------------|
|          |                                                                                            |              |                                                   |                         |                      |                                  |               |                  |              | State of each ingredient | Cooking method of the recipe | Total amount of recipe measured | Links to food/ recipes |
| 1        |                                                                                            |              |                                                   |                         |                      |                                  |               |                  |              |                          |                              |                                 |                        |
|          | Ingredient:                                                                                |              | Description                                       |                         |                      |                                  |               |                  |              |                          |                              |                                 |                        |
|          |                                                                                            |              |                                                   |                         | NA                   |                                  |               |                  |              |                          |                              |                                 |                        |
|          |                                                                                            |              |                                                   |                         | NA                   |                                  |               |                  |              |                          |                              |                                 |                        |
|          |                                                                                            |              |                                                   |                         | NA                   |                                  |               |                  |              |                          |                              |                                 |                        |
|          |                                                                                            |              |                                                   |                         | NA                   |                                  |               |                  |              |                          |                              |                                 |                        |
|          |                                                                                            |              |                                                   |                         | NA                   |                                  |               |                  |              |                          |                              |                                 |                        |
| 2        |                                                                                            |              |                                                   |                         |                      |                                  |               |                  |              |                          |                              |                                 |                        |
|          |                                                                                            |              |                                                   |                         | NA                   |                                  |               |                  |              |                          |                              |                                 |                        |
|          |                                                                                            |              |                                                   |                         | NA                   |                                  |               |                  |              |                          |                              |                                 |                        |
|          |                                                                                            |              |                                                   |                         | NA                   |                                  |               |                  |              |                          |                              |                                 |                        |
|          |                                                                                            |              |                                                   |                         | NA                   |                                  |               |                  |              |                          |                              |                                 |                        |
|          |                                                                                            |              |                                                   |                         | NA                   |                                  |               |                  |              |                          |                              |                                 |                        |
| 3        |                                                                                            |              |                                                   |                         |                      |                                  |               |                  |              |                          |                              |                                 |                        |
|          |                                                                                            |              |                                                   |                         | NA                   |                                  |               |                  |              |                          |                              |                                 |                        |
|          |                                                                                            |              |                                                   |                         | NA                   |                                  |               |                  |              |                          |                              |                                 |                        |
|          |                                                                                            |              |                                                   |                         | NA                   |                                  |               |                  |              |                          |                              |                                 |                        |
|          |                                                                                            |              |                                                   |                         | NA                   |                                  |               |                  |              |                          |                              |                                 |                        |

1  
2  
3  
4  
5  
6  
7  
8  
9  
10  
11  
12  
13  
14  
15  
16  
17  
18  
19  
20  
21  
22  
23  
24  
25  
26  
27  
28  
29  
30  
31  
32  
33  
34  
35  
36  
37  
38  
39  
40  
41  
42  
43  
44  
45  
46

| What was the first | Time of | Please describe this food / | How was | Place of | I o | A m | A m | A m | Recipe information |
|--------------------|---------|-----------------------------|---------|----------|-----|-----|-----|-----|--------------------|
|                    |         |                             |         | NA       |     |     |     |     |                    |

**Time of meal:** 1. Early morning 2. Mid-Morning 3. Noon 4. Afternoon 5. Evening 6. Late evening

**Place of preparation:** 1. Home 2. Outside home

**How was it prepared:** 1=raw/ no change/ as purchased; 2=fermented; 3=fried; 04=cooked or boiled – wet heat; 5=baked/ grilled/ broiled – dry heat; 6=local miller; 7=blanched (dipped in boiling water); 8=other

For peer review only

1 **Module 17: Biomarkers collection tools**

2  
3  
4 **PRESCHOOL AGE CHILDREN (6-59 MONTHS)**  
5 **ETHIOPIAN FOOD AND NUTRITION STRATEGY BASELINE SURVEY 2020/21**  
6 **Biochemical and Health Related Data Collection Tool**  
7

| IDENTIFICATION                                                                                       |                                                                                      |
|------------------------------------------------------------------------------------------------------|--------------------------------------------------------------------------------------|
| HH00. CLUSTER (EA) NAME.....                                                                         | HH01. CLUSTER NUMBER: <input type="text"/> <input type="text"/> <input type="text"/> |
| HH02. HH NUMBER: <input type="text"/> <input type="text"/>                                           | HH03. RESIDENCE (RURAL=1, URBAN=2): <input type="text"/> <input type="text"/>        |
| HH04. RESPONDENT LINE NUMBER: (SHOULD BE MOTHER/CAREGIVER) <input type="text"/> <input type="text"/> | HH05 CHILD LINE NUMBER <input type="text"/> <input type="text"/>                     |
| HH06. INTERVIEWER NAME _____<br>CODE: _____                                                          | HH07. TEAM LEADER, NAME: _____<br>CODE: _____                                        |
| HH08. SUPERVISOR NAME: _____<br>CODE. _____                                                          |                                                                                      |

25  
26  
27 **PRESCHOOL CHILDREN 6-59 MONTHS OLD**

28  
29 **PART I: CHILD HEALTH QUESTIONS**

30 I would like to ask you some health and food questions about your child. Fill or Circle the correct answer

| S.N | Questions                                                                                                                                                                                                      | Response                                                                                                       | SKIP |
|-----|----------------------------------------------------------------------------------------------------------------------------------------------------------------------------------------------------------------|----------------------------------------------------------------------------------------------------------------|------|
| 1   | <p><b>What is the birth date of the child? In day/month/ year (How many months old is this child?)</b></p> <p>NOTE FOR INTERVIEWERS<br/>(Screening question to verify that the date of birth of the child)</p> | <p>Birth Date: _____</p> <p>(Day/Month/Year)</p> <p>Age in months <input type="text"/><input type="text"/></p> |      |
| 2   | <p><b>Has (child's name) been diagnosed with anemia in the past 6 months?</b></p>                                                                                                                              | <p>No.....0</p> <p>Yes .....1</p> <p>Don't know.....98</p>                                                     |      |

**PART II: CHILD BIOCHEMICAL MEASUREMENT**

|                                                                                                                                                                                                                                                                                                                                                                                                                                                                   |                                                                                               |
|-------------------------------------------------------------------------------------------------------------------------------------------------------------------------------------------------------------------------------------------------------------------------------------------------------------------------------------------------------------------------------------------------------------------------------------------------------------------|-----------------------------------------------------------------------------------------------|
| Consent given for: <b>PL01</b> Blood <input type="checkbox"/> <b>PL02</b> Stool <input type="checkbox"/><br>(Y OR N)                                                                                                                                                                                                                                                                                                                                              |                                                                                               |
| <b>PL03</b> Code for Laboratory Technician: <input type="text"/> <input type="text"/>                                                                                                                                                                                                                                                                                                                                                                             | Lab Tech Name _____                                                                           |
| <b>PL04</b> BLUE TOP TUBE (METAL FREE)<br>Not collected = 00.0 Refused = 77.7                                                                                                                                                                                                                                                                                                                                                                                     | ML. <input type="text"/> <input type="text"/> ● <input type="text"/>                          |
| <b>PL05</b> PURPLE TOP TUBE (EDTA)<br>Not collected = 00.0<br>Refused = 77.7                                                                                                                                                                                                                                                                                                                                                                                      | ML. <input type="text"/> <input type="text"/> ● <input type="text"/>                          |
| <b>PL06</b> RED TOP TUBE (EDTA)<br>Not collected = 00.0<br>Refused = 77.7                                                                                                                                                                                                                                                                                                                                                                                         | ML. <input type="text"/> <input type="text"/> ● <input type="text"/>                          |
| <b>PL07</b> Date blood sample taken (Ethiopian<br>Day/Month/Year)                                                                                                                                                                                                                                                                                                                                                                                                 | Date: ____/____/____<br>Day / Month / Year                                                    |
| <b>PL08</b> TIME BLOOD DRAW (Ethiopian time)                                                                                                                                                                                                                                                                                                                                                                                                                      | Blood draw ____ : ____ Hour Minute                                                            |
| <b>PL09</b> When did you eat your most recent meal (food)?<br>(Ethiopian time)                                                                                                                                                                                                                                                                                                                                                                                    | ____ : ____<br>Hour Minute                                                                    |
| <b>PL10</b> MALARIA RESULTS (RDK)                                                                                                                                                                                                                                                                                                                                                                                                                                 | NEGATIVE.....0<br>POSITIVE P FALCIPARUM .....1<br><br>Positive P VIVAX.....2<br>INVALID.....3 |
| <b>PL11</b> FEVER in last 24 HR?                                                                                                                                                                                                                                                                                                                                                                                                                                  | NO.....0<br>YES .....1                                                                        |
| <b>PL12</b> HEMOGLOBIN RESULTS                                                                                                                                                                                                                                                                                                                                                                                                                                    | g/dL <input type="text"/> <input type="text"/> ● <input type="text"/>                         |
| <b>In order to determine if you have worms in the stool, we would like to collect a stool sample from your child. If you can provide this now, we appreciate it. If not now, we can come back to pick up the sample at a later time. INSTRUCTIONS IF UNABLE TO PRODUCE AT WILL:</b><br><b>For stool:</b> We will return tomorrow to pick up your stool. We would like the freshest stool you can give us. Please use one cup to collect the first stool you pass. |                                                                                               |
| <b>PL13</b> STOOL COLLECTED?                                                                                                                                                                                                                                                                                                                                                                                                                                      | NO.....0 YES<br>.....1                                                                        |
| <b>PL14</b> Date stool sample taken (Ethiopian<br>Day/Month/Year)                                                                                                                                                                                                                                                                                                                                                                                                 | Date: ____/____/____<br>Day / Month / Year                                                    |
| <b>PL15</b> TIME: STOOL COLLECTED (Ethiopian time)                                                                                                                                                                                                                                                                                                                                                                                                                | ____ : ____                                                                                   |

|                                                                     |       |        |
|---------------------------------------------------------------------|-------|--------|
|                                                                     | Hour  | Minute |
| <b>PL16 TIME: STOOL PASSED, Ethiopian time (as recorded on cup)</b> | _____ | _____  |
|                                                                     | Hour  | Minute |
| <b>PL17 Time Blood centrifuged (Ethiopian time)</b>                 | _____ | _____  |
|                                                                     | Hour  | Minute |

Thank you for completing this interview.

**INTERVIEWER’S OBSERVATIONS**

**TO BE FILLED IN AFTER COMPLETING INTERVIEW**

**COMMENTS ABOUT RESPONDENT:**

---



---



---



---



---



---



---

**SCHOOL AGE CHILDREN 6-12 YEARS  
ETHIOPIAN FOOD AND NUTRITION STRATEGY BASELINE SURVEY 2020/21  
Biochemical and Health Related Data Collection Tool**

| IDENTIFICATION                                                       |                                                                |  |
|----------------------------------------------------------------------|----------------------------------------------------------------|--|
| <b>SG01. CLUSTER NUMBER:</b>                                         | <input type="text"/> <input type="text"/> <input type="text"/> |  |
| <b>SG02. HH NUMBER:</b>                                              | <input type="text"/> <input type="text"/>                      |  |
| <b>SG03. RESPONDENT LINE NUMBER:</b><br>(SHOULD BE MOTHER/CAREGIVER) | <input type="text"/> <input type="text"/>                      |  |
| <b>SG04 SCHOOL CHILD LINE NUMBER</b>                                 | <input type="text"/> <input type="text"/>                      |  |

**In general, for children 6-10 years of age: get parental report (ask the questions of the caretaker and enter the child’s name into the parentheses)**

**For children 11-12 years of age who are present and can provide information: get self-report (ask questions directly of the child and enter “you” or “yourself” into the parentheses)**

**PART I: CHILD HEALTH RELATED QUESTIONS**

| No. | QUESTION                                                                                                               | CODING CATEGORIES             | SKIP               |
|-----|------------------------------------------------------------------------------------------------------------------------|-------------------------------|--------------------|
| S1  | How old are you/is your child?<br><br><i>(Verify that the age is the same age as written on the household listing)</i> | <input type="text"/><br>Years |                    |
| S2  | Have you/ your child ever attended school?                                                                             | No.....<br>Yes .....          | 00<br>01<br>00 →S4 |
| S3  | What is the highest level of school (name of child) completed?                                                         | None.....0<br>Primary .....1  |                    |

**PART II: CHILD BIOCHEMICAL MEASUREMENT**

|                                                                                                                                                                               |                                                                                                               |
|-------------------------------------------------------------------------------------------------------------------------------------------------------------------------------|---------------------------------------------------------------------------------------------------------------|
| Verbal consent given for: <b>SL01</b> Blood <b>SL02</b> Urine <b>SL03</b> Stool<br>0= No OR 1= yes <input type="checkbox"/> <input type="checkbox"/> <input type="checkbox"/> |                                                                                                               |
| <b>SL04</b> Phlebotomist Code <input type="text"/> <input type="text"/>                                                                                                       |                                                                                                               |
| <b>SL5</b> BLUE TOP TUBE (METAL FREE)<br><b>Did not work =00.0</b><br><b>Refused = 77.7</b>                                                                                   | ML. <input type="text"/> <input type="text"/> ● <input type="text"/>                                          |
| <b>SL6</b> PURPLE TOP TUBE (EDTA)<br><b>Did not work =00.0</b><br><b>Refused = 77.7</b>                                                                                       | ML. <input type="text"/> <input type="text"/> ● <input type="text"/>                                          |
| <b>SL7</b> REDTOP TUBE (EDTA)<br><b>Did not work =00.0</b><br><b>Refused = 77.7</b>                                                                                           | ML. <input type="text"/> <input type="text"/> ● <input type="text"/>                                          |
| <b>SL8</b> DATE BLOOD SAMPLE TAKEN (Ethiopian calendar)                                                                                                                       | Date: ____ / ____ / ____<br>Day / Month / Year                                                                |
| <b>SL9</b> TIME BLOOD DRAW (Ethiopian time)                                                                                                                                   | Blood draw ____ : ____<br>Hour    Minute                                                                      |
| <b>SL10</b> When did you eat your most recent meal (food)?<br>(Ethiopian time)                                                                                                | Last Meal Eaten ____ : ____<br>Hour    Minute                                                                 |
| <b>SL11</b> FEVER in last 24 HR? (Since same time yesterday)                                                                                                                  | No.....00<br>Yes .....01                                                                                      |
| <b>SL12</b> MALARIA RESULTS (RDK)                                                                                                                                             | NEGATIVE.....00<br>POSITIVE P <i>falciparum</i> .....01<br>POSITIVE P <i>vivax</i> .....02<br>INVALID .....03 |

|                                                                                                                                                                                                                                                 |                                                                     |
|-------------------------------------------------------------------------------------------------------------------------------------------------------------------------------------------------------------------------------------------------|---------------------------------------------------------------------|
| <b>SL13 HEMOGLOBIN RESULTS</b>                                                                                                                                                                                                                  | g/dL <input type="text"/> <input type="text"/> <input type="text"/> |
| <b>SL14</b> Is that finger prick or venous sample taken?                                                                                                                                                                                        | Finger prick.....00<br>Venous .....01                               |
| <b>In order to determine if you have blood in urine or worms in stool we would like to collect a urine and stool sample. If you can provide this now, we appreciate it. If not now, we can come back to pick up the sample at a later time.</b> |                                                                     |
| <b>SL15</b> Urine collected?                                                                                                                                                                                                                    | No.....00<br>yes .....01                                            |
| <b>SL16</b> Blood in urine RESULTS                                                                                                                                                                                                              | Negative.....00<br>positive .....01                                 |
| <b>SL17</b> Stool collected?                                                                                                                                                                                                                    | No.....00<br>yes.....01                                             |
| <b>SL18</b> Date and time when stool passed by the respondent (as recorded on cup) (Ethiopian time)                                                                                                                                             | Date: ___/___/___ and ___ : ___<br>Day / Month /Year Hour Minute    |
| <b>SL19</b> Date stool sample taken (Ethiopian calendar)                                                                                                                                                                                        | Date: ___/___/___<br>Day / Month / Year                             |
| <b>SL20</b> Time when stool collected from the respondent (Ethiopian time)                                                                                                                                                                      | ___ : ___<br>Hour Minute                                            |
| <b>SL21</b> TIME BLOOD centrifuged (Ethiopian time)                                                                                                                                                                                             | ___ : ___<br>Hour Minute                                            |

Thank the respondent and tell them that the lab team will be arriving later.

**INTERVIEWER'S OBSERVATIONS  
TO BE FILLED IN AFTER COMPLETING INTERVIEW**

**COMMENTS:**

---



---



---



---

**ADELESCENT GIRLS (10-19 YEARS)**  
**ETHIOPIAN FOOD AND NUTRITION STRATEGY BASELINE SURVEY 2020/21**  
**Biochemical and Health Related Data Collection Tool**

|                                                                                                                                                                                   |                                                                                                                                                                                                      |
|-----------------------------------------------------------------------------------------------------------------------------------------------------------------------------------|------------------------------------------------------------------------------------------------------------------------------------------------------------------------------------------------------|
| <b>IDENTIFICATION</b>                                                                                                                                                             |                                                                                                                                                                                                      |
| <b>HH00.</b> CLUSTER (EA) NAME.....                                                                                                                                               | <b>HH01.</b> CLUSTER NUMBER: <input style="width: 20px; height: 20px;" type="text"/> <input style="width: 20px; height: 20px;" type="text"/> <input style="width: 20px; height: 20px;" type="text"/> |
| <b>HH02.</b> HH NUMBER: <input style="width: 20px; height: 20px;" type="text"/> <input style="width: 20px; height: 20px;" type="text"/>                                           | <b>HH03.</b> RESIDENCE (RURAL=1, URBAN=2): <input style="width: 20px; height: 20px;" type="text"/> <input style="width: 20px; height: 20px;" type="text"/>                                           |
| <b>HH04.</b> RESPONDENT LINE NUMBER: (SHOULD BE MOTHER/CAREGIVER) <input style="width: 20px; height: 20px;" type="text"/> <input style="width: 20px; height: 20px;" type="text"/> | <b>HH05</b> WOMEN LINE NUMBER <input style="width: 20px; height: 20px;" type="text"/> <input style="width: 20px; height: 20px;" type="text"/>                                                        |
| <b>HH06.</b> INTERVIEWER NAME _____<br>CODE: _____                                                                                                                                | <b>HH07.</b> TEAM LEADER, NAME: _____<br>CODE: _____                                                                                                                                                 |
| <b>HH08.</b> SUPERVISOR NAME: _____<br>CODE. _____                                                                                                                                |                                                                                                                                                                                                      |

**PART I: HEALTH RELATED QUESTIONS**

I would like to ask you some health and food questions about yourself. Fill or Circle the correct answer

| No. | Question                                                                                                 | Coding categories                                             | Skip |
|-----|----------------------------------------------------------------------------------------------------------|---------------------------------------------------------------|------|
| 1   | How old are you?<br><br><i>(verify that the age is the same age as written on the household listing)</i> | <input style="width: 40px; height: 20px;" type="text"/> Years |      |
| 2   | Have you been diagnosed with anemia in the past six months?                                              | No.....0<br>Yes .....1<br>Don't know.....98                   |      |
| 3   | Do you smoke? (do not include the powder and chew type)                                                  | No.....0<br>Yes .....1                                        |      |

**PART II: ADOLESCENT BIOCHEMICAL MEASUREMENT**

|                                                                     |                                                                                                                                                                               |                                                                                |  |
|---------------------------------------------------------------------|-------------------------------------------------------------------------------------------------------------------------------------------------------------------------------|--------------------------------------------------------------------------------|--|
| Consent given for:<br>0= No or 1= Yes                               | <b>AG01</b> Blood <input style="width: 20px; height: 20px;" type="checkbox"/>                                                                                                 | <b>AGL02</b> Stool <input style="width: 20px; height: 20px;" type="checkbox"/> |  |
| <b>AG03</b> BLUE TOP TUBE (METAL FREE)<br><b>Did not work =00.0</b> | ML. <input style="width: 20px; height: 20px;" type="text"/> <input style="width: 20px; height: 20px;" type="text"/> . <input style="width: 20px; height: 20px;" type="text"/> |                                                                                |  |



|                                        |                                                                                                                                                                                                                                                                                                                                                                                                                                                                        |                                                                                                                                                                                        |
|----------------------------------------|------------------------------------------------------------------------------------------------------------------------------------------------------------------------------------------------------------------------------------------------------------------------------------------------------------------------------------------------------------------------------------------------------------------------------------------------------------------------|----------------------------------------------------------------------------------------------------------------------------------------------------------------------------------------|
| 1<br>2<br>3<br>4<br>5                  | <b>Refused = 77.7</b>                                                                                                                                                                                                                                                                                                                                                                                                                                                  |                                                                                                                                                                                        |
| 6<br>7<br>8                            | <b>AG04 PURPLE TOP TUBE (EDTA)</b><br><b>Did not work =00.0</b><br><b>Refused = 77.7</b>                                                                                                                                                                                                                                                                                                                                                                               | ML. <input type="text"/> <input type="text"/> . <input type="text"/>                                                                                                                   |
| 9<br>10<br>11                          | <b>AG05 REDTOP TUBE (EDTA)</b><br><b>Did not work =00.0</b><br><b>Refused = 77.7</b>                                                                                                                                                                                                                                                                                                                                                                                   | ML. <input type="text"/> <input type="text"/> . <input type="text"/>                                                                                                                   |
| 12<br>13<br>14<br>15                   | <b>AG06</b> Date blood sample taken (Ethiopian calendar)                                                                                                                                                                                                                                                                                                                                                                                                               | Date: ____/____/____<br>Day / Month / Year                                                                                                                                             |
| 16<br>17<br>18                         | <b>AG07</b> TIME BLOOD DRAW (Ethiopian time)                                                                                                                                                                                                                                                                                                                                                                                                                           | Blood draw ____ : ____<br>Hour Minute                                                                                                                                                  |
| 19<br>20<br>21<br>22                   | <b>AG08</b> When did you eat your most recent meal (food)?<br>(Ethiopian date and time)                                                                                                                                                                                                                                                                                                                                                                                | ____/____/____ : ____<br>Date /Month/ Year Hour Minute                                                                                                                                 |
| 23<br>24<br>25                         | <b>AG09</b> Is it Finger prick or venous blood sample taken?                                                                                                                                                                                                                                                                                                                                                                                                           | 01 Finger prick<br>02 Venous                                                                                                                                                           |
| 26<br>27<br>28<br>29<br>30<br>31<br>32 | <b>AG09</b> MALARIA RESULTS (RDT)                                                                                                                                                                                                                                                                                                                                                                                                                                      | NEGATIVE..... 00<br>POSITIVE <i>P falciparum</i> ..... 01<br>POSITIVE <i>P vivax</i> ..... 02<br>POSITIVE FOR BOTH <i>P falciparum</i> and <i>P vivax</i> ..... 03<br>INVALID ..... 04 |
| 33<br>34<br>35<br>36                   | <b>AG10</b> HEMOGLOBIN RESULTS                                                                                                                                                                                                                                                                                                                                                                                                                                         | g/dL <input type="text"/> <input type="text"/> . <input type="text"/>                                                                                                                  |
| 37<br>38<br>39<br>40<br>41<br>42<br>43 | <p><b>In order to determine if you have worms in the stool we would like to collect a stool sample. If you can provide this now, we appreciate it. If not now, we can come back to pick up the sample at a later time.</b></p> <p><i>INSTRUCTIONS IF UNABLE TO PRODUCE AT WILL:</i></p> <p><b>For stool:</b> We will return tomorrow to pick up your stool. We would like the fresh stool you can give us. Please use one cup to collect the first stool you pass.</p> |                                                                                                                                                                                        |
| 44<br>45                               | <b>AG11</b> Stool collected?                                                                                                                                                                                                                                                                                                                                                                                                                                           | No.....00<br>yes .....01                                                                                                                                                               |
| 46<br>47<br>48<br>49                   | <b>AG12</b> Date stool sample taken (Ethiopian calendar)                                                                                                                                                                                                                                                                                                                                                                                                               | Date: ____/____/____<br>Day / Month / Year                                                                                                                                             |
| 50<br>51<br>52                         | <b>AG13</b> Time when stool passed by the respondent (as recorded on cup)<br>(Ethiopian time)                                                                                                                                                                                                                                                                                                                                                                          | ____ : ____<br>Hour Minute                                                                                                                                                             |
| 53<br>54<br>55<br>56                   | <b>AG14</b> Time when stool collected from the respondent (Ethiopian time)                                                                                                                                                                                                                                                                                                                                                                                             | ____ : ____                                                                                                                                                                            |

1  
2  
3  
4  
5  
6  
7  
8  
9  
10  
11  
12  
13  
14  
15  
16  
17  
18  
19  
20  
21  
22  
23  
24  
25  
26  
27  
28  
29  
30  
31  
32  
33  
34  
35  
36  
37  
38  
39  
40  
41  
42  
43  
44  
45  
46  
47  
48  
49  
50  
51  
52  
53  
54  
55  
56  
57  
58  
59  
60

|                                                     |      |        |
|-----------------------------------------------------|------|--------|
|                                                     | Hour | Minute |
| <b>AG15 TIME BLOOD centrifuged (Ethiopian time)</b> |      |        |
|                                                     | Hour | Minute |

**OBSERVATIONS  
TO BE FILLED IN AFTER COMPLETING INTERVIEW**

**COMMENTS:**

---



---



---

**WOMEN OF REPRODUCTIVE AGE 15-49 YEAR OLDS  
ETHIOPIAN FOOD AND NUTRITION STRATEGY BASELINE SURVEY 2020/21  
Biochemical and Health Related Data Collection Tool**

|                                                                                                                |                                                                                             |
|----------------------------------------------------------------------------------------------------------------|---------------------------------------------------------------------------------------------|
| <b>IDENTIFICATION</b>                                                                                          |                                                                                             |
| <b>HH00. CLUSTER (EA) NAME</b> .....                                                                           | <b>HH01. CLUSTER NUMBER:</b> <input type="text"/> <input type="text"/> <input type="text"/> |
| <b>HH02. HH NUMBER:</b> <input type="text"/> <input type="text"/>                                              | <b>HH03. RESIDENCE (RURAL=1, URBAN=2):</b> <input type="text"/> <input type="text"/>        |
| <b>HH04. RESPONDENT LINE NUMBER:</b><br>(SHOULD BE MOTHER/CAREGIVER) <input type="text"/> <input type="text"/> | <b>HH05 WOMEN LINE NUMBER</b> <input type="text"/> <input type="text"/>                     |
| <b>HH06. INTERVIEWER NAME</b> _____<br>CODE: _____                                                             | <b>HH07. TEAM LEADER, NAME:</b> _____<br>CODE: _____                                        |
| <b>HH08. SUPERVISOR NAME:</b> _____<br>CODE: _____                                                             |                                                                                             |

**PART I: HEALTH RELATED QUESTIONS**

| S.N                                                                                                         | QUESTION                                                                                                 | Response                                           | SKIP |
|-------------------------------------------------------------------------------------------------------------|----------------------------------------------------------------------------------------------------------|----------------------------------------------------|------|
| 1                                                                                                           | How old are you?<br><br><i>(verify that the age is the same age as written on the household listing)</i> | <input type="text"/> <input type="text"/><br>Years |      |
| Now I would like to ask you some questions about your health. I will first ask you about the last 6 months. |                                                                                                          |                                                    |      |
| 2                                                                                                           | Have you been diagnosed with anemia in the past six months?                                              | No.....0                                           |      |

|   |                                                                                                                                                            |                                                 |  |
|---|------------------------------------------------------------------------------------------------------------------------------------------------------------|-------------------------------------------------|--|
|   |                                                                                                                                                            | Yes .....1<br>Don't know.....98                 |  |
| 2 | Have you been ill with malaria in the past 2 weeks?                                                                                                        | No.....0<br><br>Yes .....1<br>Don't know.....98 |  |
| 3 | Do you smoke? (do not include the powder and chew type)                                                                                                    | No.....0<br><br>Yes .....1                      |  |
| 4 | Are you currently lactating?                                                                                                                               | No.....0<br><br>Yes .....1                      |  |
| 5 | During that last pregnancy (that resulted in a live birth) did you have difficulty with your vision at night ("Dafent" night blindness in local language)? | No.....0<br><br>Yes .....1<br>Don't know.....98 |  |
| 6 | In the first two months after delivery, did you receive a vitamin A dose (like this)?<br><br><i>SHOW THE CAPSULE</i>                                       | No.....0<br><br>Yes .....1<br>Don't know.....98 |  |

**PART II: WOMEN BIOCHEMICAL MEASUREMENT**

|                                                                                                                       |                                                                            |
|-----------------------------------------------------------------------------------------------------------------------|----------------------------------------------------------------------------|
| <b>If the women is pregnant do not collect venous blood</b>                                                           |                                                                            |
| Consent given for:                                                                                                    | <b>WL01</b> Blood <b>WL02</b> Urine <b>WL03</b> Stool                      |
| 0= No or 1= Yes                                                                                                       | <input type="checkbox"/> <input type="checkbox"/> <input type="checkbox"/> |
| <b>WL4</b> BLUE TOP TUBE (METAL FREE)<br><b>Did not work =00.0</b><br><b>Refused = 77.7</b><br><b>Pregnant = 99.9</b> | ML. <input type="text"/> <input type="text"/> . <input type="text"/>       |
| <b>WL5</b> PURPLE TOP TUBE (EDTA)<br><b>Did not work =00.0</b><br><b>Refused = 77.7</b><br><b>Pregnant = 99.9</b>     | ML. <input type="text"/> <input type="text"/> . <input type="text"/>       |
| <b>WL6</b> REDTOP TUBE (EDTA)<br><b>Did not work =00.0</b><br><b>Refused = 77.7</b><br><b>Pregnant = 99.9</b>         | ML. <input type="text"/> <input type="text"/> . <input type="text"/>       |
| <b>WL7</b> Date blood sample taken (Ethiopian calendar)                                                               | Date: ____/____/____                                                       |

|                                                                                                                                                                                                                                                                                                                                                                                                                                                                                                                                                                                |                                                                                                                                                                                              |
|--------------------------------------------------------------------------------------------------------------------------------------------------------------------------------------------------------------------------------------------------------------------------------------------------------------------------------------------------------------------------------------------------------------------------------------------------------------------------------------------------------------------------------------------------------------------------------|----------------------------------------------------------------------------------------------------------------------------------------------------------------------------------------------|
|                                                                                                                                                                                                                                                                                                                                                                                                                                                                                                                                                                                | Day / Month / Year                                                                                                                                                                           |
| <b>WL8</b> TIME BLOOD DRAW (Ethiopian time)                                                                                                                                                                                                                                                                                                                                                                                                                                                                                                                                    | Blood draw ____ : ____<br>Hour Minute                                                                                                                                                        |
| <b>WL9</b> When did you eat your most recent meal (food)?<br>(Ethiopian date and time)                                                                                                                                                                                                                                                                                                                                                                                                                                                                                         | ____ / ____ / ____ : ____<br>Date /Month/ Year Hour Minute                                                                                                                                   |
| <b>WL 10</b> Finger prick or venous sample taken?                                                                                                                                                                                                                                                                                                                                                                                                                                                                                                                              | 01 Finger prick<br>02 Venous                                                                                                                                                                 |
| <b>WL11</b> MALARIA RESULTS (RDT)                                                                                                                                                                                                                                                                                                                                                                                                                                                                                                                                              | NEGATIVE..... 00<br>POSITIVE P <i>falciparum</i> ..... 01<br>POSITIVE P <i>vivax</i> ..... 02<br>POSITIVE FOR BOTH P <i>falciparum</i> and P <i>vivax</i> .....<br>03<br>INVALID .....<br>04 |
| <b>WL12</b> HEMOGLOBIN RESULTS                                                                                                                                                                                                                                                                                                                                                                                                                                                                                                                                                 | g/dL <input type="text"/> <input type="text"/> <input type="text"/>                                                                                                                          |
| <p><b>In order to determine if you have blood in the urine or worms in the stool we would like to collect a urine and stool sample. If you can provide this now, we appreciate it. If not now, we can come back to pick up the sample at a later time.</b></p> <p><i>INSTRUCTIONS IF UNABLE TO PRODUCE AT WILL:</i></p> <p><b>For stool:</b> We will return tomorrow to pick up your stool. We would like the fresh stool you can give us. Please use one cup to collect the first stool you pass.</p> <p><b>For urine:</b> We will return tomorrow to pick up your urine.</p> |                                                                                                                                                                                              |
| <b>WL13</b> Urine collected?                                                                                                                                                                                                                                                                                                                                                                                                                                                                                                                                                   | No.....0<br>0 yes .....01                                                                                                                                                                    |
| <b>WL14</b> RESULTS (blood in urine)<br><b>Ask the women if she is Menstruating</b><br>(Don't test if the women is in Menstruation)                                                                                                                                                                                                                                                                                                                                                                                                                                            | Negative.....00<br>positive .....01<br>Women is Menstruating.....03                                                                                                                          |
| <b>WL15</b> Stool collected?                                                                                                                                                                                                                                                                                                                                                                                                                                                                                                                                                   | No.....00<br>yes .....01                                                                                                                                                                     |
| <b>WL16</b> Date stool sample taken (Ethiopian calendar)                                                                                                                                                                                                                                                                                                                                                                                                                                                                                                                       | Date: ____ / ____ / ____<br>Day / Month / Year                                                                                                                                               |
| <b>WL17</b> Time when stool passed by the respondent (as recorded on cup) (Ethiopian time)                                                                                                                                                                                                                                                                                                                                                                                                                                                                                     | ____ : ____<br>Hour Minute                                                                                                                                                                   |
| <b>WL18</b> Time when stool collected from the respondent (Ethiopian time)                                                                                                                                                                                                                                                                                                                                                                                                                                                                                                     | ____ : ____                                                                                                                                                                                  |

1  
2  
3  
4  
5  
6  
7  
8  
9  
10  
11  
12  
13  
14  
15  
16  
17  
18  
19  
20  
21  
22  
23  
24  
25  
26  
27  
28  
29  
30  
31  
32  
33  
34  
35  
36  
37  
38  
39  
40  
41  
42  
43  
44  
45  
46  
47  
48  
49  
50  
51  
52  
53  
54  
55  
56  
57  
58  
59  
60

|                                                     |       |        |
|-----------------------------------------------------|-------|--------|
|                                                     | Hour  | Minute |
| <b>WL19 TIME BLOOD centrifuged (Ethiopian time)</b> | _____ | _____  |
|                                                     | Hour  | Minute |

**OBSERVATIONS**  
**TO BE FILLED IN AFTER COMPLETING INTERVIEW**

**COMMENTS:**

---



---



---



---

For peer review only

## Supplementary consent 1

### 1. Informed Consent Form for Household Head

#### Ethiopian Food and Nutrition Strategy (FNS) Baseline Survey

**Investigator(s):** Dr.Masresha Tessema (PI), Meseret W/Yohannes, Dr. Meron Girma, Alemnesh Petros, Dr Aregash Samuel, Arnaud Laillou, Stanley Chitekwe, Kaleab Baye, Ramadhani Noor, Anne Sophie Donze and other co-authors

You are being invited to take part in this research because you are head of household. There are about [16596] households taking part in this research. We will ask you about household characteristics, and socio-economic status of your household. We will also assess dietary intake, anthropometric status, nutrition sensitive and specific indicators and micronutrient status of your household member.

#### Box 1. Taking part in this research is voluntary

You can refuse to take part in this study.

You can withdraw your participation from the study at any time

#### Information related to the study

The FNS baseline survey will be conducted in the 12 regions of Ethiopia. The study population will be children age 0-59 months having caregivers/mothers, school-age children (6-12 years), adolescent girls (10-19 years), reproductive-age women (15-49 years), pregnant and lactating women, and household head. The indicators that will be collected for the survey will be dietary intake, anthropometric status, nutrition sensitive and specific indicators and micronutrient status.

**The expected possible adverse effects:** there is no adverse effect by participating in this study

**The objective of this research:** to produce information on anthropometric status, dietary intakes, and micronutrient status of different population groups in Ethiopia, and assess the coverage of direct and indirect nutrition interventions.

|                                                                                                           |                                                                                                        |
|-----------------------------------------------------------------------------------------------------------|--------------------------------------------------------------------------------------------------------|
| <b>Study design:</b> A population-based, cross-sectional design                                           |                                                                                                        |
| <b>The schedule of the study:</b> The study will be conducted from July, 2021 to April, 2023              |                                                                                                        |
| <b>Foreseeable risks and expected benefits arising from participation in the study</b>                    |                                                                                                        |
| <b>Foreseeable risks</b>                                                                                  | <b>Expected benefits</b>                                                                               |
| Risks to study participants for involvement in the coverage survey are low. There may be risks associated | The findings of the study will help the ministry of health and other stakeholders engaged in nutrition |

|                                                                                                                       |                                                                                                 |
|-----------------------------------------------------------------------------------------------------------------------|-------------------------------------------------------------------------------------------------|
| with COVID pandemic. Interviewers will be trained to minimize this risk and will use appropriate prevention measures. | to improve and/or design appropriate health and nutrition intervention programs in the country. |
|-----------------------------------------------------------------------------------------------------------------------|-------------------------------------------------------------------------------------------------|

### Occurrences that may take place during the study period

| Occurrences                             | How to manage                                                                                                                               |
|-----------------------------------------|---------------------------------------------------------------------------------------------------------------------------------------------|
| Withdrawal of volunteers from the study | In such a case, we would respect the volunteer's decision to withdraw and also get a clear understanding of the reason for their withdrawal |

At the end of the study, you will not be receiving any financial benefits, but will get your results for height, weight, mid upper arm and waist circumference measurements, anemia and goiter status for time you spent and participation.

All data collected from the study will be kept confidential. If you have any questions related to the study you may contact directly Dr. Masresha Tessema who is the project PI.

#### The contact persons

1. Dr. Masresha Tessema Tel. [+251 919782082] E-mail: [masresha88@gmail.com] or
2. [Mr. Ibrahim Kedir] Tel. [+251 911957161] EPHI's IRB

### Certificate of Consent

|                                                                                                                                                                                                             |                                                                                                                                                                                                |
|-------------------------------------------------------------------------------------------------------------------------------------------------------------------------------------------------------------|------------------------------------------------------------------------------------------------------------------------------------------------------------------------------------------------|
| I have read the foregoing information. I have an opportunity to ask questions and all my questions have been answered to my satisfaction. I volunteer to give consent to participate in this research study | I confirm that the participant was given an opportunity to ask questions about the study and all questions have been answered correctly. I confirm that the consent has been given voluntarily |
| _____                                                                                                                                                                                                       | _____                                                                                                                                                                                          |
| Printed name of the participant                                                                                                                                                                             | Printed name of the person taking the consent                                                                                                                                                  |
| _____                                                                                                                                                                                                       | _____                                                                                                                                                                                          |
| Signature of the participant                                                                                                                                                                                | Signature of the person taking the consent                                                                                                                                                     |
| Date _____                                                                                                                                                                                                  | Date _____                                                                                                                                                                                     |
| day/month/year                                                                                                                                                                                              | day/month/year                                                                                                                                                                                 |

## 2. Informed Consent Form for Women of Reproductive Age

### Ethiopian Food and Nutrition Strategy (FNS) Baseline Survey

**Investigator(s):** Dr.Masresha Tessema (PI), Meseret W/Yohannes, Dr. Meron Girma, Alemnesh Petros, Dr Aregash Samuel, Arnaud Laillou, Stanley Chitekwe, Kaleab Baye, Ramadhani Noor, Anne Sophie Donze and other co-authors

You are being invited to take part in this research because you are women of reproductive age. There are [16596] households taking part in this research. We will assess your dietary intake, anthropometric status, nutrition sensitive and specific indicators and micronutrient status

#### Box 1. Taking part in this research is voluntary

You can refuse to take part in this study.

You can withdraw your participation from the study at any time

#### Information related to the study

The FNS baseline survey will be conducted in the 12 regions of Ethiopia. The study population will be children age 0-59 months having caregivers/mothers, school-age children (6-12 years), adolescent girls (10-19 years), reproductive-age women (15-49 years), pregnant and lactating women, and household head. The indicators that will be collected for the survey will be dietary intake, anthropometric status, nutrition sensitive and specific indicators and micronutrient status.

**The expected possible adverse effects:** there is no adverse effect by participating in this study

**The objective of this research:** to produce information on anthropometric status, dietary intakes, and micronutrient status of different population groups in Ethiopia, and assess the coverage of direct and indirect nutrition interventions.

|                                                                                                                                                                                                                                 |                                                                                                                                                                                                        |
|---------------------------------------------------------------------------------------------------------------------------------------------------------------------------------------------------------------------------------|--------------------------------------------------------------------------------------------------------------------------------------------------------------------------------------------------------|
| <b>Study design:</b> A population-based, cross-sectional design                                                                                                                                                                 |                                                                                                                                                                                                        |
| <b>The schedule of the study:</b> The study will be conducted from July, 2021 to April, 2023                                                                                                                                    |                                                                                                                                                                                                        |
| <b>Foreseeable risks and expected benefits arising from participation in the study</b>                                                                                                                                          |                                                                                                                                                                                                        |
| <b>Foreseeable risks</b>                                                                                                                                                                                                        | <b>Expected benefits</b>                                                                                                                                                                               |
| Risks to study participants for involvement in the coverage survey are low. There may be risks associated with COVID pandemic. Interviewers will be trained to minimize this risk and will use appropriate prevention measures. | The findings of the study will help the ministry of health and other stakeholders engaged in nutrition to improve and/or design appropriate health and nutrition intervention programs in the country. |



1  
2  
3  
4  
5  
6  
7  
8  
9  
10  
11  
12  
13  
14  
15  
16  
17  
18  
19  
20  
21  
22  
23  
24  
25  
26  
27  
28  
29  
30  
31  
32  
33  
34  
35  
36  
37  
38  
39  
40  
41  
42  
43  
44  
45  
46  
47  
48  
49  
50  
51  
52  
53  
54  
55  
56  
57  
58  
59  
60

| <b>Occurrences that may take place during the study period</b> |                                                                                                                                             |
|----------------------------------------------------------------|---------------------------------------------------------------------------------------------------------------------------------------------|
| <b>Occurrences</b>                                             | <b>How to manage</b>                                                                                                                        |
| Withdrawal of volunteers from the study                        | In such a case, we would respect the volunteer's decision to withdraw and also get a clear understanding of the reason for their withdrawal |

At the end of the study, you will not be receiving any financial benefits, but will get your results for height, weight, mid upper arm and waist circumference measurements, anemia and goiter status for time you spent and participation.

All data collected from the study will be kept confidential. If you have any questions related to the study you may contact directly Dr. Masresha Tessema who is the project PI.

#### **The contact persons**

1. Dr. Masresha Tessema Tel. [+251 919782082] E-mail: [masresha88@gmail.com] or
2. [Mr. Ibrahim Kedir] Tel. [+251 911957161] EPHI's IRB

#### **Certificate of Consent**

I have read the foregoing information. I have an opportunity to ask questions and all my questions have been answered to my satisfaction. I volunteer to give consent to participate in this research study

\_\_\_\_\_  
Printed name of the participant

\_\_\_\_\_  
Signature of the participant

Date \_\_\_\_\_  
day/month/year

I confirm that the participant was given an opportunity to ask questions about the study and all questions have been answered correctly. I confirm that the consent has been given voluntarily

\_\_\_\_\_  
Printed name of the person taking the consent

\_\_\_\_\_  
Signature of the person taking the consent

Date \_\_\_\_\_  
day/month/year

### 3. Informed Consent Form for Pregnant Women

#### Ethiopian Food and Nutrition Strategy (FNS) Baseline Survey

**Investigator(s):** Dr.Masresha Tessema (PI), Meseret W/Yohannes, Dr. Meron Girma, Alemnesh Petros, Dr Aregash Samuel, Arnaud Laillou, Stanley Chitekwe, Kaleab Baye, Ramadhani Noor, Anne Sophie Donze and other co-authors

You are being invited to take part in this research because you are pregnant women. There are [16596] households taking part in this research. We will assess your, anthropometric status, nutrition sensitive and specific indicators and anemia status

#### Box 1. Taking part in this research is voluntary

You **can refuse** to take part in this study.

You **can withdraw** your participation from the study at any time

#### Information related to the study

The FNS baseline survey will be conducted in the 12 regions of Ethiopia. The study population will be children age 0-59 months having caregivers/mothers, school-age children (6-12 years), adolescent girls (10-19 years), reproductive-age women (15-49 years), pregnant and lactating women, and household head. The indicators that will be collected for the survey will be dietary intake, anthropometric status, nutrition sensitive and specific indicators and micronutrient status.

**The expected possible adverse effects:** There is no adverse effect by participating in this study

**The objective of this research:** to produce information on anthropometric status, dietary intakes, and micronutrient status of different population groups in Ethiopia, and assess the coverage of direct and indirect nutrition interventions.

**Study design:** a population-based, cross-sectional design

**The schedule of the study:** The study will be conducted from July, 2021 to April, 2023

#### Foreseeable risks and expected benefits arising from participation in the study

##### Foreseeable risks

Risks to study participants for involvement in the coverage survey are low. There may be risks associated with COVID pandemic. Interviewers will be trained to minimize this risk and will use appropriate prevention measures.

##### Expected benefits

The findings of the study will help the ministry of health and other stakeholder engaged in nutrition to improve and/or design appropriate health and nutrition intervention programs in the country.

#### Occurrences that may take place during the study period

| Occurrences                             | How to manage                                                                                                                               |
|-----------------------------------------|---------------------------------------------------------------------------------------------------------------------------------------------|
| Withdrawal of volunteers from the study | In such a case, we would respect the volunteer's decision to withdraw and also get a clear understanding of the reason for their withdrawal |

At the end of the study, you will not be receiving any financial benefits, but will get your results for height, weight, mid upper arm circumference measurements, anemia and goiter status for time you spent and participation.

All data collected from the study will be kept confidential. If you have any questions related to the study you may contact directly Dr. Masresha Tessema who is the PI

#### The contact persons

1. Dr. Masresha Tessema  
Tel. [+251 919782082] E-mail: [masresha88@gmail.com]
2. [Mr. Ibrahim Kedir] Tel. [+251 911957161]

#### Certificate of Consent

|                                                                                                                                                                                                             |                                                                                                                                                                                                |
|-------------------------------------------------------------------------------------------------------------------------------------------------------------------------------------------------------------|------------------------------------------------------------------------------------------------------------------------------------------------------------------------------------------------|
| I have read the foregoing information. I have an opportunity to ask questions and all my questions have been answered to my satisfaction. I volunteer to give consent to participate in this research study | I confirm that the participant was given an opportunity to ask questions about the study and all questions have been answered correctly. I confirm that the consent has been given voluntarily |
| _____                                                                                                                                                                                                       | _____                                                                                                                                                                                          |
| Printed name of the participant                                                                                                                                                                             | _____                                                                                                                                                                                          |
| _____                                                                                                                                                                                                       | _____                                                                                                                                                                                          |
| Signature of the participant                                                                                                                                                                                | Printed name of the person taking the consent                                                                                                                                                  |
| Date _____                                                                                                                                                                                                  | _____                                                                                                                                                                                          |
| day/month/year                                                                                                                                                                                              | Signature of the person taking the consent Date                                                                                                                                                |
| _____                                                                                                                                                                                                       | _____                                                                                                                                                                                          |
| _____                                                                                                                                                                                                       | day/month/year                                                                                                                                                                                 |

#### 4. Informed Consent Form for Preschool Child

##### Ethiopian Food and Nutrition Strategy (FNS) Baseline Survey

**Investigator(s):** Dr.Masresha Tessema (PI), Meseret W/Yohannes, Dr. Meron Girma, Alemnesh Petros, Dr

Aregash Samuel, Arnaud Laillou, Stanley Chitekwe, Kaleab Baye, Ramadhani Noor, Anne Sophie Donze and other co-authors

You are being invited to take part in this research because you are either a mother or caregiver who has a child under the age of 5 years (0-59 months). There are [16596] households taking part in this research. We would collect a sample of your child's dietary information, blood, urine and stool. And, we will also measure your child's height/ length, weight, and mid upper arm circumference. Finally we will assess, your child's eye for bitot spot

#### Box 1. Taking part in this research is voluntary

You can refuse to take part in this study.

You can withdraw your participation from the study at any time

#### Information related to the study

The FNS baseline survey will be conducted in the 12 regions of Ethiopia. The study population will be children age 0-59 months having caregivers/mothers, school-age children 6-12 years), adolescent girls (10-19 years), reproductive-age women (15-49 years), pregnant and lactating women, and household head. The indicators that will be collected for the survey will be dietary intake, anthropometric status, nutrition sensitive and specific indicators and micronutrient status.

**The expected possible adverse effects :** there is no adverse effect by participating in this study

**The objective of this research:** to produce information on anthropometric status, dietary intakes, and micronutrient status of different population groups in Ethiopia, and assess the coverage of direct and indirect nutrition interventions.

|                                                                                                                                                                                                                                 |                                                                                                                                                                                                       |
|---------------------------------------------------------------------------------------------------------------------------------------------------------------------------------------------------------------------------------|-------------------------------------------------------------------------------------------------------------------------------------------------------------------------------------------------------|
| <b>Study design:</b> a population-based, cross-sectional design                                                                                                                                                                 |                                                                                                                                                                                                       |
| <b>The schedule of the study:</b> The study will be conducted from July, 2021 to April, 2023                                                                                                                                    |                                                                                                                                                                                                       |
| <b>Foreseeable risks and expected benefits arising from participation in the study</b>                                                                                                                                          |                                                                                                                                                                                                       |
| <b>Foreseeable risks</b>                                                                                                                                                                                                        | <b>Expected benefits</b>                                                                                                                                                                              |
| Risks to study participants for involvement in the coverage survey are low. There may be risks associated with COVID pandemic. Interviewers will be trained to minimize this risk and will use appropriate prevention measures. | The findings of the study will help the ministry of health and other stakeholder engaged in nutrition to improve and/or design appropriate health and nutrition intervention programs in the country. |
| <b>Occurrences that may take place during the study period</b>                                                                                                                                                                  |                                                                                                                                                                                                       |
| <b>Occurrences</b>                                                                                                                                                                                                              | <b>How to manage</b>                                                                                                                                                                                  |

|                                         |                                                                                                                                                    |
|-----------------------------------------|----------------------------------------------------------------------------------------------------------------------------------------------------|
| Withdrawal of volunteers from the study | in such a case, we would respect the volunteer’s decision to withdraw and also get a clear understanding of the<br><br>reason for their withdrawal |
|-----------------------------------------|----------------------------------------------------------------------------------------------------------------------------------------------------|

At the end of the study, you will not be receiving any financial benefits, but will get your results for height/length, weight, mid upper arm circumference measurements, and anemia for time you spent and participation.

All data collected from the study will be kept confidential. If you have any questions related to the study you may contact directly Dr. Masresha Tessema who is the project principal investigator

**The contact persons**

- 1. Dr. Masresha Tessema  
Tel. [+251 919782082] E-mail: [masresha88@gmail.com]
- 2. [Mr. Ibrahim Kedir] Tel. [+251 911957161] EPHI’s IRB

**Certificate of Consent**

|                                                                                                                                                                                                                                                                                                                                                                   |                                                                                                                                                                                                                                                                                                                                                             |
|-------------------------------------------------------------------------------------------------------------------------------------------------------------------------------------------------------------------------------------------------------------------------------------------------------------------------------------------------------------------|-------------------------------------------------------------------------------------------------------------------------------------------------------------------------------------------------------------------------------------------------------------------------------------------------------------------------------------------------------------|
| I have read the foregoing information. I have an opportunity to ask questions and all my questions have been answered to my satisfaction. I volunteer to give consent to participate in this research study<br><br>_____<br>Printed name of the participant<br><br>_____<br>Signature of the participant’s parent or guardian<br><br>Date _____<br>day/month/year | I confirm that the participant was given an opportunity to ask questions about the study and all questions have been answered correctly. I confirm that the consent has been given voluntarily<br><br>_____<br>Printed name of the person taking the consent<br><br>_____<br>Signature of the person taking the consent Date<br><br>_____<br>day/month/year |
|-------------------------------------------------------------------------------------------------------------------------------------------------------------------------------------------------------------------------------------------------------------------------------------------------------------------------------------------------------------------|-------------------------------------------------------------------------------------------------------------------------------------------------------------------------------------------------------------------------------------------------------------------------------------------------------------------------------------------------------------|

## 5. Informed Consent Form for School Age Children

### Ethiopian Food and Nutrition Strategy (FNS) Baseline Survey

**Investigator(s):** Dr.Masresha Tessema (PI), Meseret W/Yohannes, Dr. Meron Girma, Alemnesh Petros, Dr Aregash Samuel, Arnaud Laillou, Stanley Chitekwe, Kaleab Baye, Ramadhani Noor, Anne Sophie Donze and other co-authors

You are being invited to take part in this research because you are either a mother or caregiver who has a school-age child. Among children 6 – 12 years, we will collect your child’s blood, urine and stool.

#### Box 1. Taking part in this research is voluntary

You can refuse to take part in this study.

You can withdraw your participation from the study at any time

#### Information related to the study

The FNS baseline survey will be conducted in the 12 regions of Ethiopia. The study population will be children age 0-59 months having caregivers/mothers, school-age children (6-12 years), adolescent girls (10-19 years), reproductive-age women (15-49 years), pregnant and lactating women, household head.

The indicators that will be collected for the survey will be dietary intake, anthropometric status, nutrition sensitive and specific indicators and micronutrient status.

**The expected possible adverse effects:** there is no adverse effect by participating in this study

**The objective of this research:** to produce information on anthropometric status, dietary intakes, and micronutrient status of different population groups in Ethiopia, and assess the coverage of direct and indirect nutrition interventions.

**Study design:** a population-based, cross-sectional design

**The schedule of the study:** The study will be conducted from July, 2021 to April, 2023

#### Foreseeable risks and expected benefits arising from participation in the study

##### Foreseeable risks

Risks to study participants for involvement in the coverage survey are low. There may be risks associated with COVID pandemic. Interviewers will be trained to minimize this risk and will use appropriate prevention measures.

##### Expected benefits

The findings of the study will help the ministry of health and other stakeholder engaged in nutrition to improve and/or design appropriate health and nutrition intervention programs in the country.

#### Occurrences that may take place during the study period

##### Occurrences

##### How to manage

|                                         |                                                                                                                                             |
|-----------------------------------------|---------------------------------------------------------------------------------------------------------------------------------------------|
| Withdrawal of volunteers from the study | In such a case, we would respect the volunteer's decision to withdraw and also get a clear understanding of the reason for their withdrawal |
|-----------------------------------------|---------------------------------------------------------------------------------------------------------------------------------------------|

At the end of the study, you will not be receiving any financial benefits, but you will get your **anemia** and **goiter** status for time you spent and participation.

All data collected from the study will be kept confidential. If you have any questions related to the study you may contact directly Dr. Masresha Tessema who is the project's PI

#### The contact persons

1. Dr. Masresha Tessema  
Tel. [+251 919782082] E-mail: [masresha88@gmail.com]
2. [Mr. Ibrahim Kedir] Tel. [+251 911957161] EPHI's IRB

#### Certificate of Consent

|                                                                                                                                                                                                             |                                                                                                                                                                                                |
|-------------------------------------------------------------------------------------------------------------------------------------------------------------------------------------------------------------|------------------------------------------------------------------------------------------------------------------------------------------------------------------------------------------------|
| I have read the foregoing information. I have an opportunity to ask questions and all my questions have been answered to my satisfaction. I volunteer to give consent to participate in this research study | I confirm that the participant was given an opportunity to ask questions about the study and all questions have been answered correctly. I confirm that the consent has been given voluntarily |
| _____                                                                                                                                                                                                       | _____                                                                                                                                                                                          |
| Printed name of the participant                                                                                                                                                                             | Printed name of the person taking the consent                                                                                                                                                  |
| _____                                                                                                                                                                                                       | _____                                                                                                                                                                                          |
| Signature of the participant's parent or guardian                                                                                                                                                           | Signature of the person taking the consent                                                                                                                                                     |
| Date _____<br>day/month/year                                                                                                                                                                                | Date _____<br>day/month/year                                                                                                                                                                   |

## 6. Assent form for Adolescent Girls (10-19 years)

### Ethiopian Food and Nutrition Strategy (FNS) Baseline Survey

**Investigator(s):** Dr.Masresha Tessema (PI), Meseret W/Yohannes, Dr. Meron Girma, Alemnesh Petros, Dr Aregash Samuel, Arnaud Laillou, Stanley Chitekwe, Kaleab Baye, Ramadhani Noor, Anne Sophie Donze and other co-authors

You are being invited to take part in this research because you are Adolescent girl. There are [16596] households taking part in this research. We will measure your dietary information (for those adolescent girls aged 15-17 years), information related to nutrition -sensitive and nutrition-specific practices, blood, and stool, we will also measure your height, weight, and mid upper arm and waist circumference and your goiter status

#### Box 1. Taking part in this research is voluntary

You can refuse to take part in this study.

You can withdraw your participation from the study at any time

#### Information related to the study

The FNS baseline survey will be conducted in the 12 regions of Ethiopia. The study population will be children age 0-59 months having caregivers/mothers, school-age children (6-12 years), adolescent girls (10-19 years), reproductive-age women (15-49 years), pregnant and lactating women, and household head. The indicators that will be collected for the survey will be dietary intake, anthropometric status, nutrition sensitive and specific indicators and micronutrient status

**The expected possible adverse effects:** There is no adverse effect by participating in this study

**The objective of this research:** to produce information on anthropometric status, dietary intakes, and micronutrient status of different population groups in Ethiopia, and assess the coverage of direct and indirect nutrition interventions.

**Study design:** a population-based, cross-sectional design

**The schedule of the study:** The study will be conducted from July, 2021 to April, 2023

#### Foreseeable risks and expected benefits arising from participation in the study

##### Foreseeable risks

Risks to study participants for involvement in the coverage survey are low. There may be risks associated with COVID pandemic. Interviewers will be trained to minimize this risk and will use appropriate prevention measures.

##### Expected benefits

The findings of the study will help the ministry of health and other stakeholder engaged in nutrition to improve and/or design appropriate health and nutrition intervention programs in the country.



| <b>Occurrences that may take place during the study period</b> |                                                                                                                                             |
|----------------------------------------------------------------|---------------------------------------------------------------------------------------------------------------------------------------------|
| <b>Occurrences</b>                                             | <b>How to manage</b>                                                                                                                        |
| Withdrawal of volunteers from the study                        | In such a case, we would respect the volunteer's decision to withdraw and also get a clear understanding of the reason for their withdrawal |

At the end of the study, you will not be receiving any financial benefits, but will get your results for height, weight, mid upper arm and waist circumference measurements, anemia and goiter status for time you spent and participation.

All data collected from the study will be kept confidential. If you have any questions related to the study you may contact directly Dr. Masresha Tessema who is the project's PI

#### **The contact persons**

1. Dr. Masresha Tessema

Tel. [+251 919782082] E-mail: [masresha88@gmail.com]

2. [Mr. Ibrahim Kedir] Tel. [+251 911957161] EPHI's IRB

#### **Certificate of Assent**

|                                                                                                                                                                                                            |                                                                                                                                                                                               |
|------------------------------------------------------------------------------------------------------------------------------------------------------------------------------------------------------------|-----------------------------------------------------------------------------------------------------------------------------------------------------------------------------------------------|
| I have read the foregoing information. I have an opportunity to ask questions and all my questions have been answered to my satisfaction. I volunteer to give assent to participate in this research study | I confirm that the participant was given an opportunity to ask questions about the study and all questions have been answered correctly. I confirm that the assent has been given voluntarily |
| _____                                                                                                                                                                                                      | _____                                                                                                                                                                                         |
| Printed name of the participant                                                                                                                                                                            | Printed name of the person taking the assent                                                                                                                                                  |
| _____                                                                                                                                                                                                      | _____                                                                                                                                                                                         |
| Signature of the participant                                                                                                                                                                               | Signature of the person taking the assent                                                                                                                                                     |
| Date _____                                                                                                                                                                                                 | Date _____                                                                                                                                                                                    |
| day/month/year                                                                                                                                                                                             | day/month/year                                                                                                                                                                                |

## STROBE Statement—checklist of items that should be included in reports of observational studies

|                           | Item No | Recommendation                                                                                                                                                                                                                                                                                                                                                                                                                                                                                                                                                                                                                                                                                   | Reported on page #                                            |
|---------------------------|---------|--------------------------------------------------------------------------------------------------------------------------------------------------------------------------------------------------------------------------------------------------------------------------------------------------------------------------------------------------------------------------------------------------------------------------------------------------------------------------------------------------------------------------------------------------------------------------------------------------------------------------------------------------------------------------------------------------|---------------------------------------------------------------|
| <b>Title and abstract</b> | 1       | (a) Indicate the study's design with a commonly used term in the title or the abstract<br>(b) Provide in the abstract an informative and balanced summary of what was done and what was found                                                                                                                                                                                                                                                                                                                                                                                                                                                                                                    | Title p.1; Abstract p.2-3                                     |
| <b>Introduction</b>       |         |                                                                                                                                                                                                                                                                                                                                                                                                                                                                                                                                                                                                                                                                                                  |                                                               |
| <b>Introduction</b>       | 4       | Explain the scientific background and rationale for the investigation being reported                                                                                                                                                                                                                                                                                                                                                                                                                                                                                                                                                                                                             | <b>Introduction</b><br>p.3-4                                  |
| Objectives                | 5       | State specific objectives, including any prespecified hypotheses                                                                                                                                                                                                                                                                                                                                                                                                                                                                                                                                                                                                                                 | Background p.5<br>last statements                             |
| <b>Methods</b>            |         |                                                                                                                                                                                                                                                                                                                                                                                                                                                                                                                                                                                                                                                                                                  |                                                               |
| Study design              | 5       | Present key elements of study design early in the paper                                                                                                                                                                                                                                                                                                                                                                                                                                                                                                                                                                                                                                          | Methods (data source) p.4                                     |
| Setting                   | 5       | Describe the setting, locations, and relevant dates, including periods of recruitment, exposure, follow-up, and data collection                                                                                                                                                                                                                                                                                                                                                                                                                                                                                                                                                                  | Methods (data source) p.5                                     |
| Participants              | 5       | (a) <i>Cohort study</i> —Give the eligibility criteria, and the sources and methods of selection of participants. Describe methods of follow-up<br><i>Case-control study</i> —Give the eligibility criteria, and the sources and methods of case ascertainment and control selection. Give the rationale for the choice of cases and controls<br><i>Cross-sectional study</i> —Give the eligibility criteria, and the sources and methods of selection of participants<br>(b) <i>Cohort study</i> —For matched studies, give matching criteria and number of exposed and unexposed<br><i>Case-control study</i> —For matched studies, give matching criteria and the number of controls per case | Methods (participants) p.5-8                                  |
| Variables                 | 5       | Clearly define all outcomes, exposures, predictors, potential confounders, and effect modifiers. Give diagnostic criteria, if applicable                                                                                                                                                                                                                                                                                                                                                                                                                                                                                                                                                         | Methods (all outcome and exposure variables are listed) p.6-8 |
| Data sources/measurement  | NA      | For each variable of interest, give sources of data and details of methods of assessment (measurement). Describe comparability of assessment methods if there is more than one group                                                                                                                                                                                                                                                                                                                                                                                                                                                                                                             | Methods (methods of measurement indicated in) p.5-8           |
| Bias                      | 10      | Describe any efforts to address potential sources of bias                                                                                                                                                                                                                                                                                                                                                                                                                                                                                                                                                                                                                                        | Methods (data quality indicated) p.10-11                      |
| Study size                | 5-6     | Explain how the study size was arrived at                                                                                                                                                                                                                                                                                                                                                                                                                                                                                                                                                                                                                                                        | Methods (data source, statistical                             |

analysis) p.5

|                        |    |                                                                                                                              |                                                                |
|------------------------|----|------------------------------------------------------------------------------------------------------------------------------|----------------------------------------------------------------|
| Quantitative variables | 10 | Explain how quantitative variables were handled in the analyses. If applicable, describe which groupings were chosen and why | Methods (measurement and statistical analysis sections) p. 8-9 |
| Statistical methods    | 10 | (a) Describe all statistical methods, including those used to control for confounding                                        | Methods (analysis section) p. 8-9                              |
|                        |    | (b) Describe any methods used to examine subgroups and interactions                                                          |                                                                |
|                        |    | (c) Explain how missing data were addressed                                                                                  |                                                                |
|                        |    | (d) <i>Cohort study</i> —If applicable, explain how loss to follow-up was addressed                                          |                                                                |
|                        |    | <i>Case-control study</i> —If applicable, explain how matching of cases and controls was addressed                           |                                                                |
|                        |    | <i>Cross-sectional study</i> —If applicable, describe analytical methods taking account of sampling strategy                 |                                                                |
|                        |    | (e) Describe any sensitivity analyses                                                                                        |                                                                |

Continued on next page

1  
2  
3  
4  
5  
6  
7  
8  
9  
10  
11  
12  
13  
14  
15  
16  
17  
18  
19  
20  
21  
22  
23  
24  
25  
26  
27  
28  
29  
30  
31  
32  
33  
34  
35  
36  
37  
38  
39  
40  
41  
42  
43  
44  
45  
46  
47  
48  
49  
50  
51  
52  
53  
54  
55  
56  
57  
58  
59  
60

| <b>Results</b>    |     |                                                                                                                                                                                                                                                                                                                                                                                                               |                                                                                                   |
|-------------------|-----|---------------------------------------------------------------------------------------------------------------------------------------------------------------------------------------------------------------------------------------------------------------------------------------------------------------------------------------------------------------------------------------------------------------|---------------------------------------------------------------------------------------------------|
| Participants      | 5*  | (a) Report numbers of individuals at each stage of study—eg numbers potentially eligible, examined for eligibility, confirmed eligible, included in the study, completing follow-up, and analysed<br>(b) Give reasons for non-participation at each stage<br>(c) Consider use of a flow diagram                                                                                                               | NA                                                                                                |
| Descriptive data  | 14* | (a) Give characteristics of study participants (eg demographic, clinical, social) and information on exposures and potential confounders<br>(b) Indicate number of participants with missing data for each variable of interest<br>(c) <i>Cohort study</i> —Summarise follow-up time (eg, average and total amount)                                                                                           | NA                                                                                                |
| Outcome data      | 15* | <i>Cohort study</i> —Report numbers of outcome events or summary measures over time<br><i>Case-control study</i> —Report numbers in each exposure category, or summary measures of exposure<br><i>Cross-sectional study</i> —Report numbers of outcome events or summary measures                                                                                                                             | NA                                                                                                |
| Main results      | 16  | (a) Give unadjusted estimates and, if applicable, confounder-adjusted estimates and their precision (eg, 95% confidence interval). Make clear which confounders were adjusted for and why they were included<br>(b) Report category boundaries when continuous variables were categorized<br>(c) If relevant, consider translating estimates of relative risk into absolute risk for a meaningful time period | NA                                                                                                |
| Other analyses    | 17  | Report other analyses done—eg analyses of subgroups and interactions, and sensitivity analyses                                                                                                                                                                                                                                                                                                                | NA                                                                                                |
| <b>Discussion</b> |     |                                                                                                                                                                                                                                                                                                                                                                                                               |                                                                                                   |
| Key results       | 18  | Summarise key results with reference to study objectives                                                                                                                                                                                                                                                                                                                                                      | p. 9-10                                                                                           |
| Limitations       | 19  | Discuss limitations of the study, taking into account sources of potential bias or imprecision. Discuss both direction and magnitude of any potential bias                                                                                                                                                                                                                                                    | Discussion (strengths and weaknesses of the study) p.10-11                                        |
| Interpretation    | 20  | Give a cautious overall interpretation of results considering objectives, limitations, multiplicity of analyses, results from similar studies, and other relevant evidence                                                                                                                                                                                                                                    | Discussion (interpretation of findings in the context of existing research, meaning of the study: |

1  
2  
3  
4  
5  
6  
7  
8  
9  
10  
11  
12  
13  
14  
15  
16  
17  
18  
19  
20  
21  
22  
23  
24  
25  
26  
27  
28  
29  
30  
31  
32  
33  
34  
35  
36  
37  
38  
39  
40  
41  
42  
43  
44  
45  
46  
47  
48  
49  
50  
51  
52  
53  
54  
55  
56  
57  
58  
59  
60p.9-11  
implication

---

|                  |    |                                                                       |                                                                   |
|------------------|----|-----------------------------------------------------------------------|-------------------------------------------------------------------|
| Generalisability | 21 | Discuss the generalisability (external validity) of the study results | Discussion<br>(strengths and<br>weakness of the<br>study) p.10-11 |
|------------------|----|-----------------------------------------------------------------------|-------------------------------------------------------------------|

---

**Other information**


---

|         |    |                                                                                                                                                               |              |
|---------|----|---------------------------------------------------------------------------------------------------------------------------------------------------------------|--------------|
| Funding | 22 | Give the source of funding and the role of the funders for the present study and, if applicable, for the original study on which the present article is based | Funding p.12 |
|---------|----|---------------------------------------------------------------------------------------------------------------------------------------------------------------|--------------|

\*Give information separately for cases and controls in case-control studies and, if applicable, for exposed and unexposed groups in cohort and cross-sectional studies.

**Note:** An Explanation and Elaboration article discusses each checklist item and gives methodological background and published examples of transparent reporting. The STROBE checklist is best used in conjunction with this article (freely available on the Web sites of PLoS Medicine at <http://www.plosmedicine.org/>, Annals of Internal Medicine at <http://www.annals.org/>, and Epidemiology at <http://www.epidem.com/>). Information on the STROBE Initiative is available at [www.strobe-statement.org](http://www.strobe-statement.org).

# BMJ Open

## Ethiopia National Food and Nutrition Survey to inform the Ethiopian National Food and Nutrition Strategy: a study protocol

|                                 |                                                                                                                                                                                                                                                                                                                                                                                                                                                                                                                                                                                                                                                                                                                                                                                                                                                                                                                                                                                                                                                                                                                                          |
|---------------------------------|------------------------------------------------------------------------------------------------------------------------------------------------------------------------------------------------------------------------------------------------------------------------------------------------------------------------------------------------------------------------------------------------------------------------------------------------------------------------------------------------------------------------------------------------------------------------------------------------------------------------------------------------------------------------------------------------------------------------------------------------------------------------------------------------------------------------------------------------------------------------------------------------------------------------------------------------------------------------------------------------------------------------------------------------------------------------------------------------------------------------------------------|
| Journal:                        | <i>BMJ Open</i>                                                                                                                                                                                                                                                                                                                                                                                                                                                                                                                                                                                                                                                                                                                                                                                                                                                                                                                                                                                                                                                                                                                          |
| Manuscript ID                   | bmjopen-2022-067641.R2                                                                                                                                                                                                                                                                                                                                                                                                                                                                                                                                                                                                                                                                                                                                                                                                                                                                                                                                                                                                                                                                                                                   |
| Article Type:                   | Protocol                                                                                                                                                                                                                                                                                                                                                                                                                                                                                                                                                                                                                                                                                                                                                                                                                                                                                                                                                                                                                                                                                                                                 |
| Date Submitted by the Author:   | 28-Mar-2023                                                                                                                                                                                                                                                                                                                                                                                                                                                                                                                                                                                                                                                                                                                                                                                                                                                                                                                                                                                                                                                                                                                              |
| Complete List of Authors:       | <p>Woldeyohannes, Meseret ; Ethiopian Public Health Institute<br/>         Girma, Meron; Ethiopian Public Health Institute, National Information Platforms for Nutrition<br/>         Petros, Alemnesh; Ethiopian Public Health Institute<br/>         Hussen, Alemayehu ; Ethiopian Public Health Institute<br/>         Samuel, Aregash; Ethiopian Public Health Institute<br/>         Dinssa, Danial ; Ethiopian Public Health Institute, Environmental and Public Health Research<br/>         Challa, Feyissa; Ethiopian Public Health Institute<br/>         Lailou, Arnaud; UNICEF, Dakar, Senegal<br/>         Chitekwe, Stanley; UNICEF Ethiopia<br/>         Baye, Kaleab ; Addis Ababa University,<br/>         Noor , Ramadhani; UNICEF Ethiopia<br/>         Donze, Anne Sophie; UNICEF Ethiopia<br/>         Tollera, Getachew; Ethiopian Public Health Institute<br/>         Dangiso, Mesay; Ethiopian Public Health Institute<br/>         Tadesse, Lia; Ethiopia Ministry of Health<br/>         Zelalem, Meseret; Ethiopia Ministry of Health<br/>         Tessema, Masresha; Ethiopian Public Health Institute,</p> |
| <b>Primary Subject Heading</b>: | Public health                                                                                                                                                                                                                                                                                                                                                                                                                                                                                                                                                                                                                                                                                                                                                                                                                                                                                                                                                                                                                                                                                                                            |
| Secondary Subject Heading:      | Epidemiology                                                                                                                                                                                                                                                                                                                                                                                                                                                                                                                                                                                                                                                                                                                                                                                                                                                                                                                                                                                                                                                                                                                             |
| Keywords:                       | EPIDEMIOLOGY, NUTRITION & DIETETICS, PUBLIC HEALTH                                                                                                                                                                                                                                                                                                                                                                                                                                                                                                                                                                                                                                                                                                                                                                                                                                                                                                                                                                                                                                                                                       |
|                                 |                                                                                                                                                                                                                                                                                                                                                                                                                                                                                                                                                                                                                                                                                                                                                                                                                                                                                                                                                                                                                                                                                                                                          |

SCHOLARONE™  
Manuscripts

1  
2  
3  
4 **1 Ethiopia National Food and Nutrition Survey to inform the Ethiopian National Food and**  
5 **2 Nutrition Strategy: a study protocol**  
6

7 3 Meseret Woldeyohannes<sup>1</sup>, Meron Girma<sup>1</sup>, Alemnesh Petros<sup>1</sup>, Alemayehu Hussen<sup>1</sup>, Aregash Samuel<sup>1</sup>,  
8 4 Danial Abera Dinssa<sup>1</sup>, Feyissa Challa<sup>1</sup>, Arnaud Laillou<sup>2</sup>, Stanley Chitekwe<sup>3</sup>, Kaleab Baye<sup>4</sup>, Ramadhani Noor<sup>3</sup>,  
9 5 Anne Sophie Donze<sup>3</sup>, Getachew Tollera<sup>1</sup>, Mesay Hailu Dangiso<sup>1</sup>, Lia Tadesse<sup>5</sup>, Meseret Zelalem<sup>5</sup>, Masresha  
10 6 Tessema<sup>1\*</sup>

11 7 <sup>1</sup> Ethiopian Public Health Institute, Addis Ababa, Ethiopia

12 8 <sup>2</sup> Regional Nutrition Specialist, United Nations Children's Fund (UNICEF) Regional Office, Dakar, Senegal

13 9 <sup>3</sup> United Nations Children's Fund (UNICEF), Addis Ababa 12000, Ethiopia

14 10 <sup>4</sup> Center for Food Science and Nutrition, Addis Ababa University, Addis Ababa 12000, Ethiopia

15 11 <sup>5</sup> Ethiopian Ministry of Health, Addis Ababa, Ethiopia

16 12 \*Correspondence to:

17 13 Masresha Tessema

18 14 PO Box 1242

19 15 Ethiopian Public Health Institute, Addis Ababa, Ethiopia

20 16 dr.masresha.tessema@gmail.com  
21  
22  
23  
24  
25  
26  
27  
28  
29  
30  
31  
32  
33 20  
34  
35  
36  
37  
38  
39  
40  
41  
42  
43  
44  
45  
46  
47  
48  
49  
50  
51  
52  
53  
54  
55  
56  
57  
58  
59  
60

## 21 ABSTRACT

22 **Introduction** Ethiopia has made significant progress in reducing malnutrition in the past two decades.  
23 Despite such improvements, a substantial segment of the country's population remains chronically  
24 undernourished and suffers from not only micronutrient deficiencies but also from increasing diet-  
25 related non-communicable diseases such as diabetes, hypertension and cancer. This survey aims to  
26 assess anthropometric status, dietary intake and micronutrient status of Ethiopian children, women, and  
27 adolescent girls. The study will also assess coverage of direct and indirect nutrition-related interventions  
28 and map agricultural soil nutrients. The survey will serve as a baseline for the recently developed  
29 Ethiopian Food System Transformation Plan and will inform the implementation of the National Food and  
30 Nutrition Strategy.

31 **Methods and analysis** As a population-based, cross-sectional survey, the study will collect data from the  
32 ten regions and two city administrations of Ethiopia. The study population will be women of reproductive  
33 age, children aged 0-59 months, school-aged children and adolescent girls. A total of 16,596 households  
34 will be surveyed, allowing the generation of national and regional estimates. A two-stage stratified  
35 cluster sampling procedure will be used to select households. In the first stage, 639 enumeration areas  
36 will be selected using probability-proportional-to-size allocation. In the second stage, 26 eligible  
37 households will be selected within each enumeration area using systematic random selection. Primary  
38 outcomes include coverage of direct and indirect nutrition interventions, infant and young child feeding  
39 practices, food insecurity, dietary intakes, mental health, anthropometric status, micronutrient status,  
40 and soil nutrient status.

41 **Ethics and dissemination** The protocol was fully reviewed and approved by the Institutional Review  
42 Board of the Ethiopian Public Health Institute (protocol no: EPHI-IRB-317-2020). The study is based  
43 voluntary participation and written informed consent is required from study participants. The findings  
44 will be disseminated via forums and conferences and will be submitted for publication in peer-reviewed  
45 journals.

### 47 **Strengths and limitations of this study**

- 48     ▪ The survey covers a large geographic area, collecting data on anthropometric status, 24hr recall  
49     quantitative dietary intakes and the determination of micronutrient status in the same  
50     participants or household, while also capturing data on the food system in Ethiopia.
- 51     ▪ The study aims improve understanding of nutritional problems across multiple facets—from  
52     agricultural soil to people to the environment in Ethiopia.
- 53     ▪ Inherent to the cross-sectional design of the study, the findings of this study cannot be used to  
54     establish cause and effect.
- 55     ▪ The study design prevents us from considering seasonal differences in nutritional outcomes and  
56     determinants.



59

## 60 INTRODUCTION

61 Globally, one in every three population are affected by one of more forms of malnutrition.<sup>1</sup> Women and  
62 children are particularly vulnerable to malnutrition due to increased physiological nutrient needs  
63 required to support fetal and child growth.<sup>2</sup> Nutritional deprivation during early life impairs growth and  
64 development, leading to poor school performance, reduced productivity, and loss of earnings in later  
65 life.<sup>3</sup> Consequently, the first 1000 days of life, from conception to the child's second year of life, was  
66 recognized as a critical window of opportunity to effectively prevent malnutrition.<sup>3 4</sup> Adolescence is also  
67 identified as a second window of opportunity to correct nutritional inadequacies and adversities faced in  
68 early life, but little is known about this life stage.

69 Despite significant progress over the past two decades, the burden of malnutrition in Ethiopia  
70 remains high.<sup>5-7</sup> Nationally, 37% of Ethiopian children under five years of age are stunted<sup>7</sup>, and 22% of  
71 women of reproductive age (WRA) are chronically undernourished (Body Mass Index (BMI) < 18.5  
72 Kg/m<sup>2</sup>).<sup>5</sup> Only 14% of children under two years of age consumed the minimum number of recommended  
73 food groups.<sup>5</sup> Furthermore, micronutrient deficiencies co-exist with chronic energy deficiency.<sup>8</sup> This along  
74 with the ongoing nutrition transition, characterized by shifts in diets<sup>9</sup>, is further complicating the  
75 nutrition landscape by increasing the prevalence of overweight and non-communicable diseases.<sup>5</sup> Nearly  
76 a fifth (16%) of Ethiopian adults are estimated to be hypertensive, and 3% are diabetic.<sup>10</sup> Therefore,  
77 addressing not only undernutrition but all forms of malnutrition is critical.

78 The Sustainable Development Goals (SDGs) recognize the importance of nutrition, primarily  
79 driven by the need to mitigate its detrimental consequences. Further, the 2012 World Health Assembly  
80 (WHA) identified global targets to be achieved by 2025 that aims to reduce stunting, anemia, low birth  
81 weight, and childhood obesity. These targets are used to track progress in SDG goal 2: Zero hunger.<sup>11</sup>  
82 Recognizing the importance of good nutrition, the Government of Ethiopia has made ending malnutrition  
83 a national priority. Ethiopia started implementing its first National Nutrition Program in 2008.<sup>12</sup> The  
84 second phase of this program (2011-2016) was a multisectoral program aimed at accelerating progress in  
85 reducing malnutrition.<sup>13</sup> Moreover, Ethiopia's first Food and Nutrition Policy was endorsed in 2018<sup>14</sup>,  
86 followed the National Food and Nutrition Strategy<sup>15</sup> which was launched in 2021 to provide a framework  
87 for the operationalization of the policy. Acceleration of progress in the reduction of malnutrition requires  
88 the design and implementation of direct and indirect nutrition interventions that can be implemented at  
89 scale. To this end, understanding the various factors contributing to the different forms of malnutrition is  
90 critical.

91 Multiple factors operating at the immediate, underlying, and basic levels contribute to  
92 malnutrition.<sup>2</sup> Inadequate dietary intake and poor health are immediate determinants.<sup>2</sup> Household food  
93 security, child care practices, access to health services, and healthy environments are underlying  
94 determinants.<sup>16</sup> Structural and contextual factors such as economic structures, political, environmental,  
95 social and cultural factors are the basic determinants of malnutrition.<sup>2</sup> The contribution of these factors  
96 varies across different contexts, and target groups, but studies capturing all these factors in a single  
97 survey are scant. The lack of timely and comprehensive information on nutritional status across critical

1  
2  
3 98 life stages and their determinants is a bottleneck that is preventing Ethiopia from designing effective  
4 99 interventions. Up to date and comprehensive data on the coverage of direct and indirect nutrition  
5 100 interventions delivered across various implementing sectors of the National Food and Nutrition Strategy  
6 101 is not yet available. This is unfortunate as such data could inform the implementation of the Strategy, but  
7 102 it can also serve as a baseline against which progress can be tracked.

10 103 Therefore, this study aims to provide the first ever comprehensive information on the nutritional  
11 104 status of different populations in Ethiopia to support evidence-based implementation of the National  
12 105 Food and Nutrition Strategy.

## 14 106 **Objectives**

16  
17 107 The overall goal of this study will be to produce nationally and regionally representative estimates on  
18 108 anthropometric status, coverage of nutrition interventions, dietary intakes, and micronutrient status for  
19 109 children, adolescent girls, and women of reproductive age in Ethiopia.

21 110 Specific objectives include:

- 23 111 1. Assess the coverage of direct and indirect nutrition interventions.
- 24 112 2. Assess food consumption patterns and nutrients intakes of children aged 6–59 months, and  
25 113 women of reproductive age.
- 27 114 3. Assess the micronutrient status of children (vitamin A, anemia, iron, iodine and zinc),  
28 115 adolescent girls, and women of reproductive age (vitamin A, vitamin D, anemia, iron, iodine,  
29 116 zinc, folate, vitamin B<sub>12</sub>)
- 31 117 4. Assess the anthropometric status of under-5 children, school-age children (6-12 years),  
32 118 adolescent girls, and women of reproductive age.
- 33 119 5. Assess the geographical distribution of soil micronutrient status in Ethiopian agricultural soil.

## 35 120 36 37 121 **METHODS AND ANALYSIS**

### 39 122 **Study design**

40 123 This study is a nationally and sub-nationally (regionally) representative cross-sectional survey that will  
41 124 characterize dietary intake, micronutrient status, and access to nutrition-related services for different  
42 125 target populations. Given that soil nutrient content can influence micronutrient content of foods and  
43 126 hence affect nutrient intake, the soil nutrient composition will also be analyzed. The study will have four  
44 127 main components. The first component will assess nutrition-specific and nutrition-sensitive indicators  
45 128 (NSS) for all target groups (children aged 0-59 months and WRA, school-age children, and adolescent  
46 129 girls) using semi-structured questionnaires. The second component will measure quantitative dietary  
47 130 intake for children aged 6-59 months and WRA (15-49 years). The third component of the survey will  
48 131 collect biomarker samples from all children (6-59 months), school-age children (6-12 years), adolescent  
49 132 girls (10-19 years), and WRA (15-49 years). The final component of the study will measure micronutrients  
50 133 in agricultural soils. The study data will be collected from July 2021 to December 2023.

### 54 134 **Setting**

1  
2  
3 135 Ethiopia has an estimated population size of 120 million and is the second most populous country in  
4 136 Africa.<sup>17</sup> The majority of its population resides in rural areas (70%).<sup>17</sup> Agriculture accounts for 40% of the  
5 137 country's gross domestic product.<sup>17</sup> Children aged 15 years and younger make up 40% of the Ethiopian  
6 138 population in 2021.<sup>18</sup> Ethiopia is administratively divided into 10 regions and two city administrations.  
7 139 This study will be conducted in all of the regions and city administrations of the country. Figure 1  
8 140 provides a geographic representation of the study areas.

### 11 141 **Participants**

12 142 The target population of this study are i) women of reproductive age (WRA) aged 15-49 years ii) children  
13 143 aged 0-59 months iii) school-age children aged 6-12 years, and iv) adolescent girls aged 10-19 years, and  
14 144 v) household head.

### 17 145 **Sample size calculations**

18 146 Sample size was estimated to guarantee adequate precision to generate national and regional estimates  
19 147 for selected indicators for each study target group. Indicators used for each target group are shown in  
20 148 Supplemental Table 1S. The required number of households and target groups was calculated using a  
21 149 single population proportion formula at the regional level. We used region-specific prevalence estimates  
22 150 for indicators, a 5% margin-of-error, a design effect of 1.5, a household response rate of 95%, and an  
23 151 individual response rate of 80%. The initial sample size was then adjusted for region-specific average  
24 152 household size and percentage of the target population from the total population. An indicator that  
25 153 provides the maximum number of households was used to estimate the final sample size for each region.  
26 154 Regional sample sizes were summed up to derive the total (national) sample size. Based on these  
27 155 calculations, the total sample size for the overall survey was 16,596 households (Supplemental Table 2S).

31 156 For WRA, dietary and biomarker data will be collected in half of the selected households within  
32 157 each Enumeration Area (EA). This selection will yield a total sample size of 7,386 WRA (50% of the  
33 158 expected 14,772 WRA). The sample size needed to assess dietary intakes and micronutrient status of  
34 159 WRA was calculated using the prevalence of inadequate zinc intake, which yielded the largest sample  
35 160 size.<sup>8,19</sup>

### 39 161 **Sampling procedures**

40 162 A two-stage stratified cluster sampling procedure will be used to select households. In the first stage, 639  
41 163 EAs, 257 urban and 382 rural will be selected using probability-proportional-to-size allocation. We will  
42 164 use the 2018 Ethiopia Population and Housing Census enumeration areas sampling frame to select EAs  
43 165 (the Primary Sampling Units (PSUs)). The Central Statistical Agency (CSA) prepared the enumeration areas  
44 166 sampling frame. An EA typically contains 100-150 households. EA maps will be used to delineate the  
45 167 boundaries of the selected EA. In the second stage of sampling to identify eligible households, all  
46 168 households with the EA will be listed. A household will be eligible for selection if at least one of the study  
47 169 target groups are residents (de jure) or stayed at the household the night before the interview (de  
48 170 factor).

51 171 Twenty-six (26) eligible households will be selected within each EA using systematic random  
52 172 selection. All target groups will be eligible for the NSS interview in the selected households. All children  
53 173 aged 6-59 months will also be eligible for dietary assessment. Women residing in 13 households (Out of  
54 174 26 households) who will be selected randomly will be eligible for dietary assessment. Biomarker samples

175 will be collected for all children under 5 years of age, school-age children, and adolescents in the selected  
176 households. Similar to dietary assessment, biomarker samples will be collected for women residing in half  
177 of the selected households (Figure 2).

## 178 **Outcomes**

### 180 ***Coverage of direct and indirect nutrition interventions***

181 A structured questionnaire will be used to determine the coverage of direct and indirect nutrition  
182 interventions provided to children aged 6-59 months, WRA, and adolescent girls. Direct nutrition  
183 interventions included vitamin A supplementation, iron supplementation, zinc supplementation, growth  
184 monitoring and promotion, nutrition counseling services, and food fortification. Water, sanitation and  
185 hygiene, coverage of food or cash assistance program, women empowerment, and mental health will be  
186 some nutrition-sensitive indicators considered in this study (Table 1). We will use standard indicator  
187 definitions proposed by the Data for Decisions to Expand Nutrition Transformation project (DataDENT) to  
188 assess coverage of nutrition programs.

### 189 ***Anthropometric status***

190 Using standardized procedures, anthropometric measurements, including weight, height/length, and  
191 mid-upper arm circumference, will be taken for all study target populations.<sup>20</sup> Anthropometric indices  
192 (weight-for-height z-scores, length/height-for-age z-scores, weight-for-age z-scores, BMI-for-age z-scores)  
193 will be calculated using the WHO 2006 child growth standards and the WHO 2007 child growth reference  
194 data. Stunting (length/height-for-age z-scores below -2 SD), wasting (weight-for-height z-scores below -2  
195 SD), underweight (weight-for-age z-scores below -2 SD), thinness (BMI-for-age z-scores below -2 SD) and  
196 BMI will be the primary anthropometric outcomes of interest.

### 197 ***Infant and young child feeding practices***

198 Infant and young child feeding practices will be assessed using the new World Health Organization (WHO)  
199 and United Nations Children's Fund (UNICEF) recommended 17 indicators to evaluate IYCF practices.<sup>21</sup>

### 200 ***Food insecurity***

201 The Food Insecurity Experience Scale (FIES) will be used to assess household food security.<sup>22</sup> The FIES  
202 consists of eight questions that assess household experience related to adequate food access. Experience  
203 questions range from worrying about getting enough food to not eating for a whole day.

204 In addition to these outcome indicators, information on the sociodemographic characteristic of  
205 households, child health, maternal health, employment status, and household agricultural practices will  
206 be collected using structured questionnaires.

### 207 ***Mental health of women***

208 Common mental health disorders will be assessed using the WHO Self-reporting questionnaire which  
209 consists of 20 questions. Women will be classified as having a common mental health disorder if the row  
210 score will be greater or equal to 6 out of 20.<sup>23</sup>

### 211 ***Assessment of dietary intakes of children and women of reproductive age***

212 We will measure dietary intake for children aged 6-59 months and WRA. A one-day quantitative multiple-  
 213 pass 24-hour recall will be conducted to assess dietary intakes. The interactive multiple-pass 24-hour  
 214 recall interview consists of four steps designed to enhance memory.<sup>24</sup> All days of the week will be  
 215 proportionately represented during the dietary survey to account for the day of the week effects on food  
 216 intake. To account for the day-to-day variability of dietary intake within individuals, a second non-  
 217 consecutive day 24-hr recall (repeat) will be collected (within 2 to 10 days of the first recall) on a  
 218 randomly selected sub-sample of WRA and children. The number of repeats needed is determined by  
 219 allocating for each region 50 repeats, which is then multiplied by a design effect of 1.5 and a 10% non-  
 220 response rate. The number of repeats will be rounded up to 1244 recalls for each target group to ensure  
 221 that the minimum number of repeats (n=83) needed from each region would be collected. Detailed non-  
 222 standard recipe ingredient data will be collected for all mixed dishes that were prepared at home.

223 We will use 15 food groups to assess the dietary intakes of women (15-49 months) and children  
 224 aged 24-59 months. These food groups were: 1) Cereals and their products, 2) Starchy Roots and tubers,  
 225 and their products, 3) Pulses, and their products, 4) Vegetables and their products, 5) Fruits and their  
 226 products, 6) Meat, and poultry their products, 7) Eggs and their products, 8) Fish, shellfish and their  
 227 products, 9) Milk and milk products, 10) Fats and oils, 11) Nuts and seeds, 12) Sugar and sweetened  
 228 products, 13) Beverages, 14) Spices and condiments, and 15) Miscellaneous. For children aged 6-23  
 229 months, we will use the updated WHO, UNICEF food groups: 1) Breastmilk, 2) Grains, roots, and tubers,  
 230 3) Pulses, nuts, and seeds, 4) Dairy products, 5) Flesh foods (meats, fish, poultry, organ meats), 6) Eggs 7)  
 231 Vitamin-A rich fruits and vegetables, and 8) other fruits and vegetables. These food groups were adapted  
 232 from the FAO/WHO Global Individual Food consumption data Tool (GIFT) food groups.<sup>25</sup>

233 ***Dietary assessment pre-survey work:*** We carried out pre-survey work to aid dietary data collection  
 234 following recommendations set by the Intake: Center for Dietary Assessment.<sup>26 27</sup> An initial step will be  
 235 developed a food and ingredient list containing a comprehensive list of food items, mixed dishes, and  
 236 ingredients expected to be consumed by the study target groups. The food list will be generated using  
 237 data from the first 2011 Ethiopian National Food Consumption Survey.<sup>19</sup> Other common foods consumed  
 238 across the regions in Ethiopia will be derived from the 2016 Household Income and Expenditure  
 239 Surveys,<sup>28</sup> the Ethiopian Food Composition Tables, and dietary intake data from other recent dietary  
 240 assessment surveys conducted by the Ethiopian Public Health Institute (EPHI). Portion size estimation  
 241 methods suitable for large-scale studies will be pre-selected for use in the survey following Intake  
 242 recommendations.<sup>29</sup> The selected methods will be direct measurement of actual foods consumed,  
 243 standard unit: size and number, proxy measurement using play dough, water, rice, and maize flour, and  
 244 finally using food price to estimate the amount of food consumed. Portion size estimation methods will  
 245 be assigned for all foods included in the food list.

246 **Table 1.** Nutrition direct and indirect interventions coverage

| No | Indicator                                                  | Target population         |
|----|------------------------------------------------------------|---------------------------|
|    | <b>Nutrition indirect intervention coverage</b>            |                           |
|    | <i>Child interventions</i>                                 |                           |
| 1. | Children received iron tablets/syrup in the last 12 months | Children aged 6-59 months |

|                                                                                    |                                                                                                                                      |                                                                                        |
|------------------------------------------------------------------------------------|--------------------------------------------------------------------------------------------------------------------------------------|----------------------------------------------------------------------------------------|
| 2.                                                                                 | Children received vitamin A supplements in the past 6 months                                                                         | Children aged 6-59 months                                                              |
| 3.                                                                                 | Children received deworming tablets in the past 6 months                                                                             | Children aged 24-59 months                                                             |
| 4.                                                                                 | All 8 basic vaccinations: one dose of BCG, three doses of DPT, three doses of the polio vaccine, and one dose of the measles vaccine | Children aged 9-59 months                                                              |
| 5.                                                                                 | No Vaccination                                                                                                                       | Children aged 0-59 months                                                              |
| <i>Growth monitoring</i>                                                           |                                                                                                                                      |                                                                                        |
| 6.                                                                                 | Weight measured in the last 3 months                                                                                                 | Children aged 0-23 months                                                              |
| 7.                                                                                 | Height measured in the last 3 months (Optional)                                                                                      | Children aged 0-23 months                                                              |
| 8.                                                                                 | MUAC measured in the last 3 months (Optional)                                                                                        | Children aged 0-23 months                                                              |
| <i>Infant and young child feeding (IYCF) counselling</i>                           |                                                                                                                                      |                                                                                        |
| 9.                                                                                 | Mothers with children 6-23 months received any IYCF counseling                                                                       | Children aged 6-23 months                                                              |
| 10.                                                                                | Mothers with children 6-23 months received age-appropriate IYCF counseling                                                           | Children aged 6-23 months                                                              |
| <i>Early breast-feeding counseling</i>                                             |                                                                                                                                      |                                                                                        |
| 11.                                                                                | Women received breastfeeding counseling with observation during the first two days after birth                                       | Women aged 15-49 years with a live birth in the past 5 years for the most recent birth |
| 12.                                                                                | Women received breastfeeding counseling during the first month after birth                                                           | Women aged 15-49 years with a live birth in the past 5 years for the most recent birth |
| <i>Coverage of Nutritional Interventions during pregnancy/antenatal Care (ANC)</i> |                                                                                                                                      |                                                                                        |
| 13.                                                                                | Percentage of women who had 4 or more ANC visits for the most recent birth                                                           | Women aged 15-49 years with a birth in the last 5 years                                |
| 14.                                                                                | Percentage of women who received counseling about healthy eating during pregnancy                                                    | Women aged 15-49 years who received antenatal care for their most recent birth         |
| 15.                                                                                | Percentage of women whose weight gain was monitored during pregnancy                                                                 | Women aged 15-49 years who received antenatal care for their most recent birth         |
| 16.                                                                                | Women received food or cash assistance during pregnancy                                                                              | Women aged 15-49 years with a birth in the last 5 years                                |
| 17.                                                                                | Women took 90+ iron/folate tablets during pregnancy                                                                                  | Women aged 15-49 years with a live birth in the past 5 years for the most recent birth |
| 18.                                                                                | Women received deworming tablets during pregnancy                                                                                    | Women aged 15-49 years with a live birth in the past 5 years for the most recent birth |
| <b>Nutrition indirect intervention coverage</b>                                    |                                                                                                                                      |                                                                                        |
| 19.                                                                                | Basic water services                                                                                                                 | Household                                                                              |
| 20.                                                                                | Basic hygiene services                                                                                                               | Household                                                                              |
| 21.                                                                                | Basic Sanitation services                                                                                                            | Household                                                                              |
| 22.                                                                                | Food insecurity (not a service hence no coverage)                                                                                    | Household                                                                              |
| 23.                                                                                | Women received food or cash assistance during                                                                                        | Women aged 15-49 years with a                                                          |

|     |                                                              |                                                          |
|-----|--------------------------------------------------------------|----------------------------------------------------------|
|     | pregnancy                                                    | live birth in the past 5 years for the most recent birth |
| 24. | Basic water services                                         | Household                                                |
| 25. | Basic hygiene services                                       | Household                                                |
| 26. | Basic Sanitation services                                    | Household                                                |
| 27. | Presence of common mental health disorders in the past month | Women aged 15-49 years                                   |
| 28. | Women empowerment                                            | Women aged 15-49 years                                   |
| 29. | Livestock ownership                                          | Household                                                |
| 30. | Agricultural productivity by food group                      | Household                                                |

### 247 **Assessment of micronutrient status**

248 Blood specimens will be collected from the study population to determine serum retinol, ferritin, soluble  
 249 transferrin receptor (sTfR), zinc, folate, vitamin B12, red blood cell (RBC) folate and 25-hydroxyvitamin D.  
 250 Additionally, markers of inflammation, alpha(1)-acid glycoprotein (AGP), high-sensitivity C-reactive  
 251 protein (hsCRP) will also be measured. We will also analyze parasites from stool specimens. All laboratory  
 252 analyses will be performed at the EPHI Clinical chemistry, and Food Science and Nutrition Laboratories.  
 253 Both laboratories participate in an external quality assessment scheme and are accredited by the  
 254 Ethiopian National Accreditation Office (ENAO). Collection, storage, and analytical procedures for blood,  
 255 urine, stool, and salt samples are described below. The details of each biomarker analysis are described in  
 256 Supplemental Materials 1-11.

257 **Blood sample collection and analysis:** Venous blood samples (5-7 mL) will be collected using vacutainer  
 258 tubes following standard operating procedures.<sup>30</sup> Trace mineral-free vacutainer tubes will be used to  
 259 collect blood for trace metal analysis. After collection, blood samples will be allowed to clot for 30  
 260 minutes in cold boxes (<8 °C). Samples will then be centrifuged at 3000 rpm (revolution per minute) for  
 261 10 minutes. The separated serum will be aliquoted and stored in -20°C portable freezers in the field.  
 262 Samples will then be transported to EPHI and stored at -80°C until analysis. Hemoglobin will be measured  
 263 in the field using Hemocue® (Hb 301, Hemocue AB, Angelholm, Sweden)<sup>31,31</sup> If the hemoglobin values are  
 264 below WHO cutoff point(11g/dl), the phlebotomist will send whole blood samples to the EPHI laboratory  
 265 to identify hemoglobinopathies using electrophoresis method.<sup>32</sup> Malaria test will be conducted on-site  
 266 using Bioline™ Malaria Ag P.f rapid diagnostic test kits (RDT) for *P. falciparum* and *P. vivax*).<sup>33</sup> Serum  
 267 soluble transferrin receptor (sTfR), AGP, hsCRP, folate, red blood cell (RBC) folate, vitamin B<sub>12</sub>, and ferritin  
 268 will be measured using Cobas 6000 analyzer (Roche Diagnostics GmbH, Mannheim, Germany). Serum  
 269 retinol will be measured using high-performance liquid chromatography (HPLC) method<sup>33</sup>, and serum zinc  
 270 and selenium will be measured using a microwave plasma atomic emission spectrometers (MP-AES)  
 271 analyzer.

272 **Stool and urine sample collection and analysis:** Stool samples will be collected using stool cups and  
 273 stored in 10 % formalin to preserve the parasite until analysis.<sup>34</sup> A portion of each stool sample will be  
 274 used to detect direct ova, larvae and cysts of intestine parasites using formal ether concentration  
 275 technique.<sup>35</sup> Urine samples will be collected from WRA and school-age children using 60 ml urine cup

1  
2  
3 276 containers. Samples will be stored at -20°C. Urinary iodine excretion will be assessed by Sandell Kolthoff  
4 277 reaction at EPHI Laboratory using Shimadzu 1800 UV-Vis spectroscopy.<sup>36</sup>

6 278 **Salt collection and analysis:** Salt samples will be collected from households with WRA for whom dietary  
7 279 data will be collected. At least 25 grams (one coffee cup) of salt will be collected to determine iodine  
8 280 content using the iodometric titration method.<sup>37</sup>

### 11 281 **Assessment of nutrients in the soil**

13 282 Soil samples will be collected from three households in each EA. Zig-zag or cross-sampling method will be  
14 283 used to collect 10 to 20 subsamples (0-30 cm depth) constituting one composite sample. Subsamples will  
15 284 be collected at a separation distance of five meters. After thoroughly mixing composite samples, 1 kg soil  
16 285 sample will be transferred to polyethylene bags. The collected soil samples will be air-dried in wooden  
17 286 trays and disaggregated using a ceramic mortar and pestle (soil grinder) at the EPHI soil laboratory.  
18 287 Samples will then pass through a 6 mm sieve of stainless-steel screens to remove debris and homogenize  
19 288 the soil sample. The sieved fraction will be further pulverized to pass through a 1 mm sieve for the  
20 289 micronutrient analysis. Soil zinc, iron, copper, and manganese will be determined following standard  
21 290 procedures.<sup>38</sup> Micronutrient content will be determined using inductively coupled plasma-optical  
22 291 emission spectroscopy (ICP-OES) after extraction with diethylene triamine penta acetic acid (DPTA).  
23 292 Additional variables that affect the mobility of micronutrients in the soil and their uptake into crops will  
24 293 also be measured. These variables include soil reaction (pH), electrical conductivity, organic matter, total  
25 294 nitrogen, and soil organic carbon content. Data collectors will also record topography, slope, cropping  
26 295 history, type, and fertilizer application information. Table 2 provides a summary of procedures for each of  
27 296 the four components of the survey by study target groups.

33 297

35 298

37 299



300 **Table 2.** Summary of data collection procedures for each of the four components of the survey

|                                                              | Child<br>0-5<br>months | Child<br>6-23<br>months | Child<br>24-59<br>months | School<br>children<br>6-12 years | Adolescent<br>girls<br>10-19 years | WRA<br>15-49<br>years | Household |
|--------------------------------------------------------------|------------------------|-------------------------|--------------------------|----------------------------------|------------------------------------|-----------------------|-----------|
| <b>Nutrition direct and indirect intervention indicators</b> |                        |                         |                          |                                  |                                    |                       |           |
| Infant and young child feeding practices                     | X                      | X                       |                          |                                  |                                    |                       |           |
| Nutritional information for adolescent girls                 |                        |                         |                          |                                  | X                                  |                       |           |
| Food insecurity                                              |                        |                         |                          |                                  |                                    |                       | X         |
| Water, sanitation and hygiene practices                      |                        |                         |                          |                                  |                                    |                       | X         |
| Coverage of food fortification                               |                        |                         |                          |                                  |                                    |                       | X         |
| Agricultural practices                                       |                        |                         |                          |                                  |                                    |                       | X         |
| Mental health                                                |                        |                         |                          |                                  |                                    | X                     |           |
| Anthropometric status                                        | X                      | X                       | X                        |                                  | X                                  | X                     |           |
| <b>Dietary assessment</b>                                    |                        |                         |                          |                                  |                                    |                       |           |
| 24-hr recall quantitative dietary intake                     |                        | X                       | X                        |                                  |                                    | X                     |           |
| <b>Assessment of biomarker status</b>                        |                        |                         |                          |                                  |                                    |                       |           |
| Blood sample                                                 |                        | X                       | X                        | X                                | X                                  | X                     |           |
| Urine sample                                                 |                        |                         |                          | X                                |                                    | X                     |           |
| Stool sample                                                 |                        | X                       | X                        | X                                | X                                  | X                     |           |
| Salt sample collection                                       |                        |                         |                          |                                  |                                    |                       | X         |
| <b>Assessment of micronutrients in the Soil</b>              |                        |                         |                          |                                  |                                    |                       |           |
| Soil micronutrient assessment                                |                        |                         |                          |                                  |                                    |                       | X         |

301

## Data quality assurance and analysis

Training of trainers on components of the survey will be held before training the data collectors and supervisors. After fifteen days of training on methodological procedures, questionnaires and quality assurance, the questionnaires will be tested in a pilot group (in EAs not included in the actual survey), and adapted based on the received feedback from the survey team. The questionnaires (including the food list) were translated into local languages (Amharic, Oromifa, Tigrigna, Somali, and Afar) and back-translated to English to ensure the quality of the translation. The data collectors' measurements will be standardized to ensure that the inter-observer variability is within tolerable limits. Supervisors received additional training on teamwork and on monitoring and supervising the data collection process. All data collection tools are programmed using open-source software (ODK) (Supplemental Material 12). Data quality checks will be included during ODK programming to prevent data recording errors. These include restricted responses, filter insert choices, skip patterns, and defaults. During data collection daily data tracking forms will be completed to track completed surveys for each study components to prevent missing data. High frequency checks will be identified prior to the survey's, and error tracking forms will be designed to track data quality in real-time. These checks included completeness checks, target group tracking, and duplicate ID checks. Random field supervision visits will also be made to check data quality. Every day, collected data will be sent to the EPHI central server and imported into statistical software programs as comma-separated values (CSV) files. For laboratory analysis, a quality control chart will be used to ensure the internal and external quality control materials are in the acceptable range.

The primary data analysis will focus on computing frequencies and percentages for categorical variables and summary statistics (like means, medians SD, IQR) for summarizing continuous variables. Sample weights will be constructed based on the selection probabilities of EAs, eligible households, and non-response rates. All analyses will also be adjusted for the survey design. Additional subgroup analysis will be computed for variables with adequate sample sizes for each category. The Biomarkers Reflecting Inflammation and Nutrition Determinants of Anemia (BRINDA) Working Group's regression correction approach will be used to account for inflammation in the study of all micronutrients status using the biomarkers C-reactive protein (CRP) and AGP. Geostatistical analyses will be employed to determine the spatial patterns of micronutrient distribution in the soil and blood samples. The wealth index will be constructed using principal component analysis (PCA).<sup>39</sup> The Rasch model will be used to construct the Food Insecurity Experience Scale (FIES).<sup>22</sup> All analyses will be done using STATA 16 and ArcGIS/QGIS. Anthropometric indices will be calculated using the WHO Anthro software for under five children and WHO AnthroPlus software for adolescents.

## Patient and public involvement

None.

## Ethics and dissemination

The study protocol is approved by the Institutional Review Board of the Ethiopian Public Health Institute (protocol no: EPHI-IRB-317-2020). Written informed consent will be obtained from each respondent and participants may withdraw at any time (Supplemental Material 13). Confidentiality of all collected data

1  
2  
3 will be given high priority during each stage of data handling. Individual names and personal information  
4 of respondents will be kept confidential and data sets will be kept anonymous for analysis.  
5

6 The study's findings will be disseminated through several communication channels, including  
7 stakeholder workshops, various local and international conferences and technical reports. Additionally,  
8 the findings will be submitted for publication in peer-reviewed journals.  
9

## 10 **DISCUSSION**

11  
12 This comprehensive, nationally representative survey will for the first time characterize simultaneously  
13 the dietary intake and micronutrient status of Ethiopian children, adolescent girls and WRA. Besides, the  
14 study assesses key drivers of malnutrition including soil nutrient composition, as well as coverage of  
15 direct and indirect nutrition interventions. The survey will provide key insights informing the  
16 implementation of Ethiopia's National Food and Nutrition Strategy.  
17  
18

19 High-quality and timely data is critical to assess the burden of nutritional problems, identify  
20 vulnerable populations and priority actions, track the implementation of nutrition programs, and assess  
21 impact.<sup>40 41</sup> Ethiopia conducted its first-ever food consumption survey in 2011.<sup>19</sup> and its micronutrient  
22 survey in 2015.<sup>42</sup> Both surveys were collected at different times, which made it difficult to link the two  
23 surveys. Besides, the causes and solutions of malnutrition are complex and multisectoral; hence,  
24 requiring data on multiple indicators from various sectors spanning from soil nutrient, diets, and  
25 micronutrient status, to access and exposure to direct and indirect nutrition interventions. In this  
26 regard, this survey is uniquely positioned to integrate data from multiple domains to support evidence-  
27 based decision making for improved diets, nutrition, and overall wellbeing.  
28  
29  
30

31 This study will allow us to evaluate progress relative to previous food consumption and  
32 micronutrient surveys, but, more importantly, will serve as a baseline against which future progress  
33 related to the implementation of the National Food and Nutrition Strategy will be evaluated.  
34 Furthermore, the current survey will also serve as a baseline for the Ethiopian Food System  
35 Transformation Plan by capturing the majority of indicators used for monitoring food systems-related  
36 progress, thus filling information gaps that could have impeded successful implementation of the  
37 National Food and Nutrition Strategy. By establishing 13 strategic objectives, the National Food and  
38 Nutrition Strategy is intended to be aligned with the strategic directions of the Food and Nutrition  
39 Policy. Each strategy direction includes initiatives, actions, and key performance indicators, as well as  
40 leading and collaborating sectors. The key performance indicators should be evaluated to determine the  
41 progress of each implementing sector's achievement. The current survey will provide up to date national  
42 and subnational information on the current food and nutrition situation in Ethiopia for different target  
43 populations as well as provide comprehensive list of indicators that are pertinent to the implementation  
44 of the policy.<sup>40</sup> In addition, this study will provide information on context-specific determinants for  
45 prioritizing direct and indirect actions that can be implemented across sectors taking into account the  
46 specific needs of different target populations.  
47  
48  
49  
50  
51  
52

53 Additionally, effective multisectoral interventions that address the immediate and underlying  
54 determinants of malnutrition must be implemented in order to accelerate the reduction of malnutrition  
55 in its all form.<sup>40</sup> These interventions need to address context-specific determinants to reduce  
56  
57

1  
2  
3 malnutrition effectively.<sup>40</sup> The lack of timely and disaggregated information on the determinants of  
4 malnutrition is a bottleneck to preventing malnutrition, particularly among the most vulnerable target  
5 populations. This study will also provide information on the coverage and quality of interventions which  
6 can be used to contextualize National Food and Nutrition Strategy monitoring frameworks, monitor  
7 implementation and track progress towards global and local targets.  
8  
9

10 Although this study will provide regionally and nationally representative estimates for key  
11 indicators and critical life stages, it has several limitations. Inherent to the cross-sectional design of the  
12 study, the findings of this study cannot be used to establish cause and effect. Additionally, the design  
13 prevents us from considering seasonal differences in nutritional outcomes and determinants. This study  
14 also relies on self-reported data, which is subject to recall bias. Notwithstanding the above-mentioned  
15 limitations, this study is uniquely designed to combine the assessment of anthropometric status, 24hr  
16 recall quantitative dietary intakes and the determination of micronutrient status in the same  
17 participants, while at the same time capturing data on the food system. Additionally, the study will be  
18 evaluating micronutrients in agricultural soil, which will expand our understanding of factors that  
19 influence nutrition. To the best of our knowledge, this will be among -if not-the first study to  
20 simultaneously collect these variables from the same household. This could contribute to a better  
21 understanding of nutritional problems across multiple facets—from soil to people to the environment.  
22 In the past, nutrition programs implemented in Ethiopia have relied on information provided from small-  
23 scale studies and population-based surveys such as the Ethiopia Demographic and Health Surveys.<sup>5-7 43 44</sup>  
24 Although these data sources provide some information to track progress and tailor interventions, they  
25 only provide data on a limited number of nutrition indicators and do not measure dietary intakes and  
26 assess biomarker status. This study will fill these data gaps by providing information on comprehensive  
27 indicators that show the burden and spatial distribution of micronutrient deficiencies and shifts in  
28 dietary patterns. Additionally, this study will provide information on emerging determinants such as  
29 mental health and intake of nutrients such as folate and B<sub>12</sub> that have not been included in previous  
30 studies. Finally, the inclusion of adolescent girls, and school-age children, will provide vital information  
31 on nutritional indicators for these target groups, which are often not included in other nationally  
32 representative surveys. This survey will also provide information on the coverage of direct interventions  
33 implemented in the health sectors and indirect interventions implemented in the agriculture, WASH,  
34 education and social protection sectors for whom scant data exists. Hence, this study will provide  
35 valuable information that will guide the implementation of strategic actions for the reduction of  
36 malnutrition in Ethiopia.  
37  
38  
39  
40  
41  
42  
43  
44  
45  
46  
47  
48  
49  
50  
51  
52  
53  
54  
55  
56  
57  
58  
59  
60

1  
2  
3 **Contributors:** MT, AL, SC, MW, AP, AS, and MG conceived the study and drafted the original protocol. All  
4 authors participated in refining of the protocol. AH, MW, MG and MT played a major role in the  
5 statistical consideration. DAD, FC, MG, RN, and ASD helped to write the draft protocol and made a  
6 critical contribution to the content. KB, AL, GT, MHD, LT and MZ supervised manuscript preparation. All  
7 authors took responsibility for reviewing, final editing and approval of the manuscript.  
8

9 **Funding:** This work was supported by Power of Nutrition, BMGF and World Bank through UNICEF;  
10 Nutrition International, and Global Alliance for Improved Nutrition.  
11

12 **Competing interests:** The authors declare that they have no conflicts of interest.  
13

14 **Patient consent for publication:** Not applicable.  
15  
16  
17  
18  
19  
20  
21  
22  
23  
24  
25  
26  
27  
28  
29  
30  
31  
32  
33  
34  
35  
36  
37  
38  
39  
40  
41  
42  
43  
44  
45  
46  
47  
48  
49  
50  
51  
52  
53  
54  
55  
56  
57  
58  
59  
60

For peer review only

## References

1. Fanzo J, Hawkes C, Udomkesmalee E, et al. 2018 Global Nutrition Report. 2019
2. Olofin I, McDonald CM, Ezzati M, et al. Associations of suboptimal growth with all-cause and cause-specific mortality in children under five years: A pooled analysis of ten prospective studies. *PLoS One* 2013;8(5):e64636. doi: 10.1371/journal.pone.0064636
3. Martorell R. Improved nutrition in the first 1000 days and adult human capital and health. *Am J Hum Biol* 2017;29(2) doi: 10.1002/ajhb.22952 [published Online First: 2017/01/25]
4. United Nations. Transforming our world: The 2030 agenda for sustainable development, 2015.
5. Central Statistical Agency [Ethiopia] and ICF. Ethiopia demographic and health survey 2016. Addis Ababa, Ethiopia and Calverton, Maryland, USA: CSA and ICF, 2016.
6. Central Statistical Agency [Ethiopia] and ORC Macro. Ethiopia demographic and health survey 2000. Addis Ababa, Ethiopia and Calverton, Maryland, USA: CSA and ORC Macro, 2001.
7. Ethiopian Public Health Institute (EPHI) [Ethiopia] and ICF. Ethiopia Mini Demographic and Health Survey 2019: Key Indicators. Rockville, Maryland, USA: EPHI and ICF, 2019.
8. Ethiopian Public Health Institute. Ethiopian national micronutrient survey report Ethiopian Public Health Institute, 2016.
9. Hassen I, Dereje M, Minten B, et al. Diet transformation in Africa: the case of Ethiopia. *Agricultural Economics* 2017
10. Ethiopian Public Health Institute, Federal Ministry of Health, World Health Organization. Ethiopia STEPS report in risk factors for non-communicable diseases and prevalence of selected NCDs Addis Ababa, Ethiopia: Ethiopian Public Health Institute 2016.
11. World Health Organization. Global nutrition monitoring framework: Operational guidance for tracking progress in meeting targets for 2025. Geneva: WHO, 2017.
12. Federal Democratic Republic of Ethiopia. National Nutrition Program: 2013-2015. Addis Ababa, Ethiopia, 2013.
13. Federal Democratic Republic of Ethiopia. National Nutrition Program: 2016-2020. Addis Ababa, Ethiopia., 2016.
14. Federal Democratic Republic of Ethiopia. Food and Nutrition Policy, 2018.
15. Federal Democratic Republic of Ethiopia. National Food and Nutrition Strategy (2021-2023), 2021.
16. Reinhardt K, Fanzo J. Addressing Chronic Malnutrition through Multi-Sectoral, Sustainable Approaches: A Review of the Causes and Consequences. *Front Nutr* 2014;1:13. doi: 10.3389/fnut.2014.00013 [published Online First: 2014/01/01]
17. Bank W. Population projections Ethiopia 2021 [
18. Bardosh KL, Hussein JW, Sadik EA, et al. Chicken eggs, childhood stunting and environmental hygiene: an ethnographic study from the Campylobacter genomics and environmental enteric dysfunction (CAGED) project in Ethiopia. *One Health Outlook* 2020;2(1) doi: 10.1186/s42522-020-00012-9
19. Ethiopian Public Health Institute. Ethiopian national food consumption survey Ethiopian Public Health Institute, 2013.
20. UNICEF Wa. Recommendations for data collection, analysis and reporting on anthropometric indicators in children under 5 years old. : World Health Organization and the United Nations Children's Fund (UNICEF), 2019.
21. WHO, UNICEF. Indicators for assessing infant and young child feeding practices: definitions and measurement methods. Geneva: World Health Organization and the United Nations Children's Fund (UNICEF), 2021.
22. Ville AS, Tsun Po JY, Sen A, et al. Food security and the Food Insecurity Experience Scale (FIES): ensuring progress by 2030. *Food Security* 2019;11(3):483-91. doi: 10.1007/s12571-019-00936-9

23. World Health Organization. Self-reported mental health questionnaires 1994.
24. Gibson RS, Ferguson EL. An interactive 24-hour recall for assessing the adequacy of iron and zinc intakes in developing countries. HarvestPlus 2008.
25. Leclercq C, Allemand P, Balcerzak A, et al. FAO/WHO GIFT (Global Individual Food consumption data Tool): a global repository for harmonised individual quantitative food consumption studies. *Proc Nutr Soc* 2019;78(4):484-95.
26. Vossenaar M, Arimond M, Deitchler M, et al. An overview of the main pre-survey tasks required for large-scale quantitative 24-Hour recall dietary surveys in low- and middle-income countries. Washington, DC: Intake – Center for Dietary Assessment/FHI Solutions., 2020.
27. Intake – Center for Dietary Assessment. Dietary Survey Protocol Template: An Outline to Assist with the Development of a Protocol for a Quantitative 24-Hour Dietary Recall Survey in a Low- or Middle-Income Country Washington, DC: Intake – Center for Dietary Assessment/FHI Solutions., 2020.
28. Central Statistical Agency[Ethiopia]. Household Consumption and Expenditure (HCE) Survey 2015/16: Analytical Report. Addis Ababa: CSA, 2016.
29. Vossenaar M, Lubowa A, Hotz C, et al. Considerations for the Selection of Portion Size Estimation Methods for Use in Quantitative 24-Hour Dietary Recall Surveys in Low- and Middle-Income Countries. Washington, DC: Intake – Center for Dietary Assessment/FHI Solutions, 2020.
30. Organization WH. Micronutrient survey manual. 2020
31. Jaggernath M, Naicker R, Madurai S, et al. Diagnostic Accuracy of the HemoCue Hb 301, STAT-Site MHgb and URIT-12 Point-of-Care Hemoglobin Meters in a Central Laboratory and a Community Based Clinic in Durban, South Africa. *PloS one* 2016;11(4):e0152184. doi: 10.1371/journal.pone.0152184 [published Online First: 2016/04/06]
32. Wieringa FT, Dahl M, Chamnan C, et al. The High Prevalence of Anemia in Cambodian Children and Women Cannot Be Satisfactorily Explained by Nutritional Deficiencies or Hemoglobin Disorders. *Nutrients* 2016;8(6) doi: 10.3390/nu8060348 [published Online First: 2016/06/25]
33. Lee GC, Jeon ES, Le DT, et al. Development and evaluation of a rapid diagnostic test for *Plasmodium falciparum*, *P. vivax*, and mixed-species malaria antigens. *Am J Trop Med Hyg* 2011;85(6):989-93. doi: 10.4269/ajtmh.2011.11-0265 [published Online First: 2011/12/07]
34. Demeke G, Fenta A, Dilnessa T. Evaluation of Wet Mount and Concentration Techniques of Stool Examination for Intestinal Parasites Identification at Debre Markos Comprehensive Specialized Hospital, Ethiopia. *Infect Drug Resist* 2021;14:1357-62. doi: 10.2147/IDR.S307683 [published Online First: 2021/04/17]
35. Kache R, Phasuk N, Viriyavejakul P, et al. Prevalence of soil-transmitted helminth infections and associated risk factors among elderly individuals living in rural areas of southern Thailand. *BMC public health* 2020;20(1):1882. doi: 10.1186/s12889-020-09986-7 [published Online First: 2020/12/09]
36. Machado A, Lima L, Mesquita RBR, et al. Improvement of the Sandell-Kolthoff reaction method (ammonium persulfate digestion) for the determination of iodine in urine samples. *Clin Chem Lab Med* 2017;55(9):e206-e08. doi: 10.1515/cclm-2016-1094 [published Online First: 2017/03/18]
37. Jooste PL, Strydom E. Methods for determination of iodine in urine and salt. *Best Pract Res Clin Endocrinol Metab* 2010;24(1):77-88. doi: 10.1016/j.beem.2009.08.006 [published Online First: 2010/02/23]
38. Lindsay WL, Norvell W. Development of a DTPA soil test for zinc, iron, manganese, and copper. *Soil Sci Soc Am J* 1978;42(3):421-28.
39. Karamizadeh S, Abdullah SM, Manaf AA, et al. An overview of principal component analysis. *Journal of Signal and Information Processing* 2020;4

- 1  
2  
3 40. Heidkamp RA, Piwoz E, Gillespie S, et al. Mobilising evidence, data, and resources to achieve global  
4 maternal and child undernutrition targets and the Sustainable Development Goals: an agenda  
5 for action. *The Lancet* 2021 doi: 10.1016/s0140-6736(21)00568-7  
6  
7 41. Victora CG, Christian P, Vdaletti LP, et al. Revisiting maternal and child undernutrition in low-income  
8 and middle-income countries: variable progress towards an unfinished agenda. *The Lancet* 2021  
9 doi: 10.1016/s0140-6736(21)00394-9  
10  
11 42. Institute EPH. Ethiopian national micronutrient Survey. Addis Ababa, Ethiopia Ethiopian Public  
12 Health Institute  
13  
14 2016.  
15 43. Central Statistical Agency [Ethiopia] and ICF. Ethiopia demographic and health survey 2011. Addis  
16 Ababa, Ethiopia and Calverton, Maryland, USA: CSA and ICF, 2011.  
17  
18 44. Central Statistical Agency [Ethiopia] and ORC Macro. Ethiopia demographic and health survey 2005.  
19 Addis Ababa, Ethiopia and Calverton, Maryland, USA: CSA and ORC Macro, 2006.  
20  
21  
22  
23  
24

## FIGURE TITLES

25  
26 **Figure 1.** Map showing study enumeration areas across regions

27  
28 **Figure 2.** Sampling frame for the Ethiopia National Food and Nutrition Survey to inform the Ethiopian  
29 National Food and Nutrition Strategy  
30  
31  
32  
33  
34  
35  
36  
37  
38  
39  
40  
41  
42  
43  
44  
45  
46  
47  
48  
49  
50  
51  
52  
53  
54  
55  
56  
57  
58  
59  
60



1  
2  
3  
4  
5  
6  
7  
8  
9  
10  
11  
12  
13  
14  
15  
16  
17  
18  
19  
20  
21  
22  
23  
24  
25  
26  
27  
28  
29  
30  
31  
32  
33  
34  
35  
36  
37  
38  
39  
40  
41  
42  
43  
44  
45  
46  
47  
48  
49  
50  
51  
52  
53  
54  
55  
56  
57  
58  
59  
60

For peer review only



33 **Figure 1.** Map showing study enumeration areas across regions  
34  
35  
36  
37  
38  
39  
40  
41  
42  
43  
44  
45  
46  
47  
48  
49  
50  
51  
52  
53  
54  
55  
56  
57  
58  
59  
60

1  
2  
3  
4  
5  
6  
7  
8  
9  
10  
11  
12  
13  
14  
15  
16  
17  
18  
19  
20  
21  
22  
23  
24  
25  
26  
27  
28  
29  
30  
31  
32  
33  
34  
35  
36  
37  
38  
39  
40  
41  
42  
43  
44  
45  
46  
47  
48  
49  
50  
51  
52  
53  
54  
55  
56  
57  
58  
59  
60

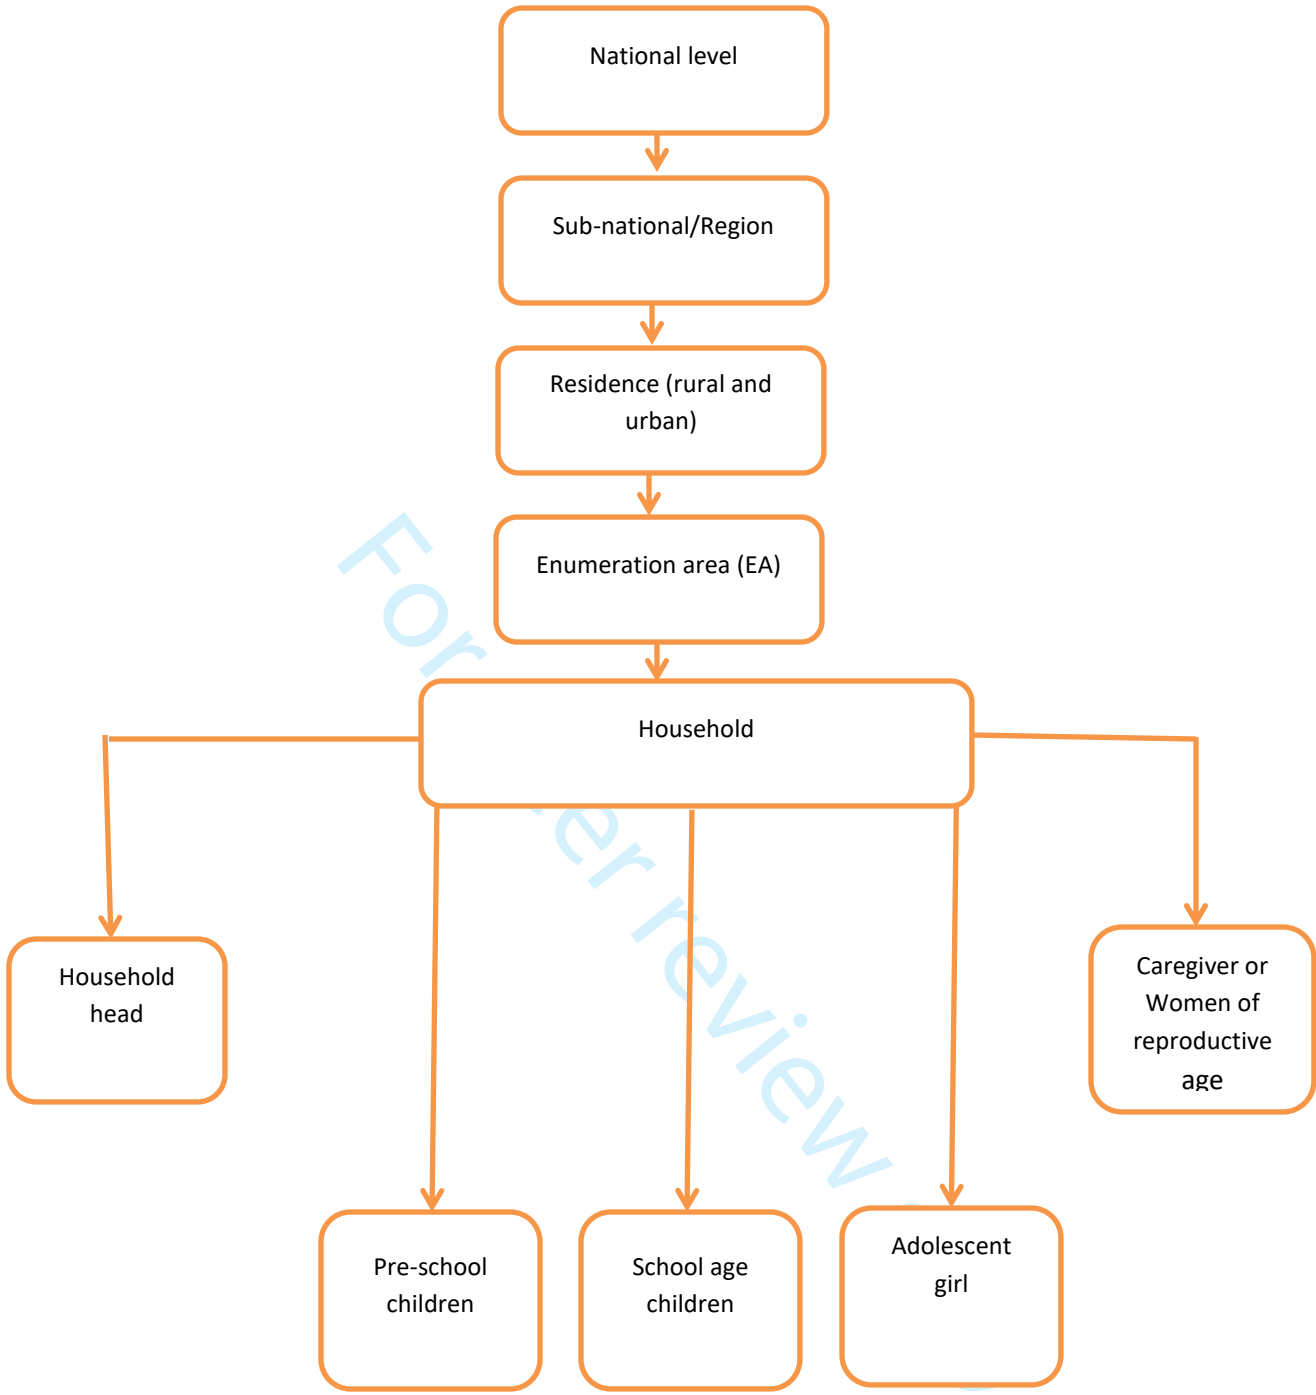

**Figure 2.** Sampling frame for Ethiopia National Food and Nutrition Survey to Inform the Ethiopian Food and Nutrition Strategy

**Table 1S.** Key indicators used to estimate sample size for each target group

| Target Group                                | Key indicators used to estimate sample size |
|---------------------------------------------|---------------------------------------------|
| Children under 5 years of age (0-59 months) | Vitamin A deficiency                        |
|                                             | Total goiter prevalence                     |
|                                             | Stunting                                    |
|                                             | Any anemia                                  |
|                                             | Zinc deficiency                             |
| Women of reproductive age (15-49 years)     | Prevalence of inadequate intake of zinc     |
|                                             | Vitamin A deficiency                        |
|                                             | Total goiter prevalence                     |
|                                             | Any anemia                                  |
|                                             | Zinc deficiency                             |
|                                             | RBC folate deficiency                       |
|                                             | Serum folate deficiency                     |
|                                             | Vitamin B <sub>12</sub> deficiency          |
|                                             | Iodized salt coverage                       |
| Prevalence of inadequate intake of iron     |                                             |
| School age children (6 to 12 years)         | Prevalence of inadequate intake of zinc     |
|                                             | Prevalence of inadequate intake vitamin A   |
|                                             | Vitamin A deficiency                        |
|                                             | Total goiter prevalence                     |
|                                             | Any anemia                                  |
| Adolescent girls (10 to 19 years)           | Iodine deficiency                           |
|                                             | Zinc deficiency                             |
|                                             | Any anemia                                  |

**Table 2S.** Sample size determination and allocation

| Region                   | Indicator used to estimate sample size | Number of EA | Number of HH  | Expected number pre-school children (0-59 months) | Expected number of WRA (15-49 years) | Expected number school age children (6-12 years) | Expected number of adolescent girls (10-19 years) | Total population (2019 year projection) |
|--------------------------|----------------------------------------|--------------|---------------|---------------------------------------------------|--------------------------------------|--------------------------------------------------|---------------------------------------------------|-----------------------------------------|
| Tigray                   | Any anemia                             | 55           | 1,432         | 590                                               | 1,236                                | 753                                              | 516                                               | 5,443,095                               |
| Afar                     | Stunting                               | 51           | 1,328         | 539                                               | 1,096                                | 695                                              | 406                                               | 1,901,863                               |
| Amhara                   | Stunting                               | 61           | 1,585         | 619                                               | 1,253                                | 843                                              | 531                                               | 21,842,548                              |
| Oromia                   | IDD                                    | 62           | 1,622         | 891                                               | 1,539                                | 1,111                                            | 739                                               | 37,267,225                              |
| Somali                   | IDD                                    | 55           | 1,424         | 855                                               | 1,268                                | 1,000                                            | 492                                               | 6,050,851                               |
| Benishangul-Gumuz        | Stunting                               | 49           | 1,282         | 555                                               | 1,127                                | 732                                              | 475                                               | 1,126,656                               |
| SNNPR                    | Any anemia                             | 59           | 1,528         | 818                                               | 1,492                                | 1,000                                            | 692                                               | 15,763,484                              |
| Gambela                  | Any anemia                             | 47           | 1,211         | 428                                               | 1,018                                | 568                                              | 373                                               | 463,203                                 |
| Harari                   | Any anemia                             | 45           | 1,164         | 375                                               | 978                                  | 499                                              | 348                                               | 257,362                                 |
| Addis Ababa              | IDD/ TGR                               | 54           | 1,411         | 413                                               | 1,274                                | 405                                              | 262                                               | 3,685,684                               |
| Dire Dawa                | Stunting                               | 47           | 1,215         | 382                                               | 1,128                                | 480                                              | 360                                               | 492,819                                 |
| Sidama                   | Any anemia                             | 54           | 1,395         | 747                                               | 1,363                                | 914                                              | 632                                               | 4,322,685                               |
| <b>Total sample size</b> |                                        | <b>639</b>   | <b>16,596</b> | <b>7,213</b>                                      | <b>14,772</b>                        | <b>9,001</b>                                     | <b>5,824</b>                                      | <b>98,617,475</b>                       |

|                                                                                 |                                          |                                   |               |
|---------------------------------------------------------------------------------|------------------------------------------|-----------------------------------|---------------|
|  | Name of institute                        | Doc. number:                      | Version No: 3 |
|                                                                                 | <b>ETHIOPIAN PUBLIC HEALTH INSTITUTE</b> | EPHI/ TL/ FNL/TM/7.2.11           | Copy no_____  |
| Document Title: <b>DETERMINTION OF IODINE FROM SALT SAMPLE</b>                  |                                          | Effective date: November 20, 2020 |               |

## 1. Purpose

This procedure used to determine the amount of iodine content in the form of potassium iodate ( $\text{KIO}_3$ ) by iodometric titration from iodized salt.

## 2. Abbreviations:

|            |                   |                                                                 |                                  |
|------------|-------------------|-----------------------------------------------------------------|----------------------------------|
| <b>g</b>   | gram              | <b>KI</b>                                                       | Potassium Iodide                 |
| <b>ppm</b> | Parts Per million | <b>H<sub>2</sub>SO<sub>4</sub></b>                              | sulfuric acid                    |
| <b>M</b>   | Molarity          | <b>KIO<sub>3</sub></b>                                          | potassium iodate                 |
| <b>ml</b>  | mili liter        | <b>IDD</b>                                                      | Iodine deficiency disorder       |
| <b>N</b>   | Normality         | <b>Na<sub>2</sub>S<sub>2</sub>O<sub>3</sub>.5H<sub>2</sub>O</b> | sodium thiosulfate penta hydrate |

## 3. Principle:

Iodine released from potassium iodate by the action of sulphuric acid and the released iodine trapped with potassium iodide and titrate with sodium thiosulphate.

## 4. Material and methods

### 4.1 Reagents

- 0.005M  $\text{Na}_2\text{S}_2\text{O}_3 \cdot 5\text{H}_2\text{O}$
- 2N  $\text{H}_2\text{SO}_4$
- 10% KI
- 1% Starch

### 4.2 Reagents preparation:

- **1%starch:** Dissolve 1 g of soluble starch in 100ml boiled distilled water heat the solution till starch dissolve completely.
- **10% KI;** Dissolve 10gm of KI in 100ml deionized water.

Prepared by: Addisu Legesse and Teshome Assefa

Authority: EPHI

NOTE: This is a CONTROLLED document for internal use only. Any documents appearing in paper form are not controlled and should be checked against the electronic version prior to use.

|                                                                                 |                                          |                                   |               |
|---------------------------------------------------------------------------------|------------------------------------------|-----------------------------------|---------------|
|  | Name of institute                        | Doc. number:                      | Version No: 3 |
|                                                                                 | <b>ETHIOPIAN PUBLIC HEALTH INSTITUTE</b> | EPHI/ TL/ FNL/TM/7.2.11           | Copy no_____  |
| Document Title: <b>DETERMIANTION OF IODINE FROM SALT SAMPLE</b>                 |                                          | Effective date: November 20, 2020 |               |

- **2N H<sub>2</sub>SO<sub>4</sub>**; Slowly add 6 ml of concentrated H<sub>2</sub>SO<sub>4</sub> to 90 ml of deionized water make the final volume 100 ml.
- **0.005M Na<sub>2</sub>S<sub>2</sub>O<sub>3</sub>**; Dissolve 1.24gm of Na<sub>2</sub>S<sub>2</sub>O<sub>3</sub>.5H<sub>2</sub>O in 1000 ml of deionized water

#### 4.3 Reagents stability and storage:

- Na<sub>2</sub>S<sub>2</sub>O<sub>3</sub>.5H<sub>2</sub>O & 10% KI reagents store in a cool & dark place for six months.
- H<sub>2</sub>SO<sub>4</sub> store at room temperature it stable indefinitely.
- Starch should be prepared daily.

#### 5. Supplies and Equipment

- Balance (Four-beam pan): Sensitivity = 0.01g, Capacity = 410g
- Flask, volumetric, 1000mL, 100mL
- Measuring cylinder, 10mL, 100mL
- Beakers (Pyrex)
- Flasks, Erlenmeyer (conical) with stopper, 250mL
- Pipette, volumetric, 1mL, 5mL
- Burette w/straight stopcock 10mL
- Burette stand
- Laboratory safety glasses
- Parafilm, for covering beakers
- Glass bottles with stoppers, for reagents, 250mL
- Spatula Lab single blade 150mm SS length
- Dropper bottle, glass 25-60mL
- Hot plate

#### 6. Sample

- Sample type: salt
- Amount required: 50-100g
- Transport and storage: At room temperature avoid exposure to direct sunlight

Prepared by: Addisu Legesse and Teshome Assefa

Authority: EPHI

NOTE: This is a CONTROLLED document for internal use only. Any documents appearing in paper form are not controlled and should be checked against the electronic version prior to use.

|                                                                                 |                                          |                                   |               |
|---------------------------------------------------------------------------------|------------------------------------------|-----------------------------------|---------------|
|  | Name of institute                        | Doc. number:                      | Version No: 3 |
|                                                                                 | <b>ETHIOPIAN PUBLIC HEALTH INSTITUTE</b> | EPHI/ TL/ FNL/TM/7.2.11           | Copy no_____  |
| Document Title: <b>DETERMIANTION OF IODINE FROM SALT SAMPLE</b>                 |                                          | Effective date: November 20, 2020 |               |

- Stability: At room temperature for 3 months.

## 7. Special Safety and Precautions

- While titrate the sample wear eye google.
- The reaction mixture should be kept in the dark before titration because a side reaction can occur when the solution is exposed to light that causes iodide ions to be oxidized to iodine.
- Inaccurate results may occur if starch solution is used while still warm.
- If starch indicator is added too early, a strong iodine-starch complex is formed, which reacts slowly, and gives falsely elevated results.
- The reaction should be performed at mild room temperature (<30 °C), since the iodine is volatile, and the indicator solution loses sensitivity when exposed to high temperatures.

## 8. Procedure

- 8.1 Weigh 10g of the salt sample into a 250mL Erlenmeyer flask with a stopper.
- 8.2 Add approximately 50 mL water, swirl to dissolve salt sample.
- 8.3 Add 1 ml 2N H<sub>2</sub>SO<sub>4</sub>
- 8.4 Add 5mL 10% KI. The solution should turn yellow if iodine is present.
- 8.5 Close the flask with stopper & put it in the dark place for 10 minutes in closed box (cupboard or drawer).
- 8.6 Rinse and fill burette with 0.005M Na<sub>2</sub>S<sub>2</sub>O<sub>3</sub>, and adjust level to zero.
- 8.7 After 10 minutes take the flask out from drawer, and add some Na<sub>2</sub>S<sub>2</sub>O<sub>3</sub> from the titration burette Until the solution turns pale yellow.
- 8.8 Add approximately 2mL of starch indicator solution (the solution should turn dark purple) and continue titrating with 0.005M Na<sub>2</sub>S<sub>2</sub>O<sub>3</sub> until the solution becomes pink, and finally colorless.
- 8.9 Record the level of thiosulfate in the burette and convert to parts per million (ppm)

Prepared by: Addisu Legesse and Teshome Assefa

Authority: EPHI

NOTE: This is a CONTROLLED document for internal use only. Any documents appearing in paper form are not controlled and should be checked against the electronic version prior to use.



|                                                                                 |                                          |                                   |               |
|---------------------------------------------------------------------------------|------------------------------------------|-----------------------------------|---------------|
|  | Name of institute                        | Doc. number:                      | Version No: 3 |
|                                                                                 | <b>ETHIOPIAN PUBLIC HEALTH INSTITUTE</b> | EPHI/ TL/ FNL/TM/7.2.11           | Copy no_____  |
| Document Title: <b>DETERMIANTION OF IODINE FROM SALT SAMPLE</b>                 |                                          | Effective date: November 20, 2020 |               |

## 9. Quality control:

- **Control material:** KIO<sub>3</sub>
- **Level of iodine:** 59.3-60.3ppm
- **Stability:** stable at room temperature for long period of time.
- **Frequency:** per batch

**10. Quality control preparation:** Prepare 0.0047M KIO<sub>3</sub> in 100ml. By weighing 0.10058g in 100ml deionized water. From this solution Pipette out 1 ml into conical flask and follow the procedure proceed from step 2 as described above.

## 11. Calculation

$$\text{Iodine(ppm)} = 10.6 * V \text{ Na}_2\text{S}_2\text{O}_3(\text{ml})$$

**Where:** VNa<sub>2</sub>S<sub>2</sub>O<sub>3</sub>: Volume of sodium thiosulphate takes to titrate iodine in salt

## 12. Result Interpretation

- **<5ppm** to indicate salt with no added iodine
- **5-14.9** ppm to indicate inadequately iodized salt
- **15-39.9** ppm to indicate salt is adequately iodized
- **>40** ppm of iodine is not recommended.

## 13. Other Records

- Data Log sheet
- QC chart

## 14. References

- De Maeyer, Lowenstein & Thilly, 1979; World Health Organization (WHO), United Nations Children Fund (UNICEF) & ICCIDD, 2007.
- AOAC 925.56 2016

Prepared by: Addisu Legesse and Teshome Assefa

Authority: EPHI

NOTE: This is a CONTROLLED document for internal use only. Any documents appearing in paper form are not controlled and should be checked against the electronic version prior to use.

|                                                                                 |                                          |                                   |               |
|---------------------------------------------------------------------------------|------------------------------------------|-----------------------------------|---------------|
|  | Name of institute                        | Doc. number:                      | Version No: 3 |
|                                                                                 | <b>ETHIOPIAN PUBLIC HEALTH INSTITUTE</b> | EPHI/ TL/ FNL/TM/7.2.11           | Copy no_____  |
| Document Title: <b>DETERMIANTION OF IODINE FROM SALT SAMPLE</b>                 |                                          | Effective date: November 20, 2020 |               |

## 15. Annex

Conversion chart for iodine in fortified salt in the form of  $KIO_3$  (PPM)

| Volume<br>Thiosulphate<br>(mL) | Iodine<br>(ppm) | Volume<br>Thiosulphate<br>(mL) | Iodine<br>(ppm) | Volume<br>Thiosulphate<br>(mL) | Iodine<br>(ppm) | Volume<br>Thiosulphate<br>(mL) | Iodine<br>(ppm) | Volume<br>Thiosulphate<br>(mL) | Iodine<br>(ppm) | Volume<br>Thiosulphate<br>(mL) | Iodine<br>(ppm) |
|--------------------------------|-----------------|--------------------------------|-----------------|--------------------------------|-----------------|--------------------------------|-----------------|--------------------------------|-----------------|--------------------------------|-----------------|
| 0.1                            | 1.1             | 2.0                            | 21.2            | 3.9                            | 41.3            | 5.8                            | 61.5            | 7.7                            | 81.6            | 9.6                            | 101.8           |
| 0.2                            | 2.1             | 2.1                            | 22.2            | 4.0                            | 42.4            | 5.9                            | 62.5            | 7.8                            | 82.7            | 9.7                            | 102.8           |
| 0.3                            | 3.2             | 2.2                            | 23.3            | 4.1                            | 43.5            | 6.0                            | 63.6            | 7.9                            | 83.4            | 9.8                            | 103.9           |
| 0.4                            | 4.2             | 2.3                            | 24.4            | 4.2                            | 44.5            | 6.1                            | 64.7            | 8.0                            | 84.8            | 9.9                            | 104.9           |
| 0.5                            | 5.3             | 2.4                            | 25.4            | 4.3                            | 45.6            | 6.2                            | 65.7            | 8.1                            | 85.9            | 10.0                           | 106.0           |
| 0.6                            | 6.4             | 2.5                            | 26.5            | 4.4                            | 46.4            | 6.3                            | 66.8            | 8.2                            | 86.9            | 10.1                           | 107.1           |
| 0.7                            | 7.4             | 2.6                            | 27.6            | 4.5                            | 47.7            | 6.4                            | 67.8            | 8.3                            | 88.0            | 10.2                           | 108.1           |
| 0.8                            | 8.5             | 2.7                            | 28.6            | 4.6                            | 48.8            | 6.5                            | 68.9            | 8.4                            | 89.0            | 10.3                           | 109.2           |
| 0.9                            | 9.4             | 2.8                            | 29.7            | 4.7                            | 49.8            | 6.6                            | 70.0            | 8.5                            | 90.1            | 10.4                           | 110.2           |
| 1.0                            | 10.6            | 2.9                            | 30.7            | 4.8                            | 50.9            | 6.7                            | 71.0            | 8.6                            | 91.2            | 10.5                           | 111.3           |
| 1.1                            | 11.7            | 3.0                            | 31.8            | 4.9                            | 51.9            | 6.8                            | 72.1            | 8.7                            | 92.2            | 10.6                           | 112.4           |
| 1.2                            | 12.2            | 3.1                            | 32.9            | 5.0                            | 53.0            | 6.9                            | 73.1            | 8.8                            | 93.3            | 10.7                           | 113.4           |
| 1.3                            | 13.8            | 3.2                            | 33.9            | 5.1                            | 54.1            | 7.0                            | 74.2            | 8.9                            | 94.3            | 10.8                           | 114.5           |
| 1.4                            | 14.8            | 3.3                            | 35.0            | 5.2                            | 55.1            | 7.1                            | 75.3            | 9.0                            | 95.4            | 10.9                           | 115.5           |
| 1.5                            | 15.9            | 3.4                            | 36.0            | 5.3                            | 56.2            | 7.2                            | 76.3            | 9.1                            | 96.5            | 11.0                           | 116.6           |
| 1.6                            | 17.0            | 3.5                            | 37.1            | 5.4                            | 57.2            | 7.3                            | 77.4            | 9.2                            | 97.5            | 11.1                           | 117.7           |
| 1.7                            | 18.0            | 3.6                            | 38.2            | 5.5                            | 58.3            | 7.4                            | 78.4            | 9.3                            | 98.6            | 11.2                           | 118.7           |
| 1.8                            | 19.1            | 3.7                            | 39.2            | 5.6                            | 59.4            | 7.5                            | 79.5            | 9.4                            | 99.7            | 11.3                           | 119.8           |
| 1.9                            | 20.1            | 3.8                            | 40.3            | 5.7                            | 60.4            | 7.6                            | 80.6            | 9.5                            | 100.7           | 11.4                           | 120.8           |

Prepared by: Addisu Legesse and Teshome Assefa

Authority: EPHI

NOTE: This is a CONTROLLED document for internal use only. Any documents appearing in paper form are not controlled and should be checked against the electronic version prior to use.

|                                                                                 |                                          |                                   |               |
|---------------------------------------------------------------------------------|------------------------------------------|-----------------------------------|---------------|
|  | Name of institute                        | Doc. number:                      | Version No: 3 |
|                                                                                 | <b>ETHIOPIAN PUBLIC HEALTH INSTITUTE</b> | EPHI/ TL/ FNL/TM/7.2.11           | Copy no _____ |
| Document Title: <b>DETERMIANTION OF IODINE FROM SALT SAMPLE</b>                 |                                          | Effective date: November 20, 2020 |               |

Name

Signature

Prepared by: -----

-----

Reviewed by: -----

-----

Approved by: -----

-----

(Director of Food science and Nutrition research directorate)

**Declaration**

I, the undersigned laboratory personnel, certify that I am conducting every steps of the procedures incorporated in this SOP after a prior reading.

Name

Signature and Date

.....

.....

.....

.....

.....

.....

.....

.....

.....

.....

|                                                |                 |
|------------------------------------------------|-----------------|
| Prepared by: Addisu Legesse and Teshome Assefa | Authority: EPHI |
|------------------------------------------------|-----------------|

NOTE: This is a CONTROLLED document for internal use only. Any documents appearing in paper form are not controlled and should be checked against the electronic version prior to use.

|                                                                                 |                                          |                                   |               |
|---------------------------------------------------------------------------------|------------------------------------------|-----------------------------------|---------------|
|  | Name of institute                        | Doc. number:                      | Version No: 3 |
|                                                                                 | <b>ETHIOPIAN PUBLIC HEALTH INSTITUTE</b> | EPHI/ TL/ FNL/TM/7.2.11           | Copy no_____  |
| Document Title: <b>DETERMIANTION OF IODINE FROM SALT SAMPLE</b>                 |                                          | Effective date: November 20, 2020 |               |

### Document Change History

| Revision No. | Date approved  | Nature of revision                                           |
|--------------|----------------|--------------------------------------------------------------|
| 1            | February, 2019 | Initial release                                              |
| 2            | November, 2020 | Typographical adjustment<br>Document revision table is added |

Prepared by: Addisu Legesse and Teshome Assefa

Authority: EPHI

NOTE: This is a CONTROLLED document for internal use only. Any documents appearing in paper form are not controlled and should be checked against the electronic version prior to use.

1  
2  
3  
4  
5  
6  
7  
8  
9  
10  
11  
12  
13  
14  
15  
16  
17  
18  
19  
20  
21  
22  
23  
24  
25  
26  
27  
28  
29  
30  
31  
32  
33  
34  
35  
36  
37  
38  
39  
40  
41  
42  
43  
44  
45  
46  
47  
48  
49  
50  
51  
52  
53  
54  
55  
56  
57  
58  
59  
60

**Determination of serum retinol using hexane as the serum sample extraction procedure**

For peer review only

1  
2  
3  
4 Contents

5 **1. Reagents and materials**..... 2  
6 **2. Instrument (HPLC) parameters – we have Shimadzu prominence HPLC.**..... 2  
7 **3. Sample extraction procedure**..... 2  
8 **4. Calculation**..... 3  
9 **5. Reference** ..... 3  
10  
11  
12  
13  
14  
15  
16  
17  
18  
19  
20  
21  
22  
23  
24  
25  
26  
27  
28  
29  
30  
31  
32  
33  
34  
35  
36  
37  
38  
39  
40  
41  
42  
43  
44  
45  
46  
47  
48  
49  
50  
51  
52  
53  
54  
55  
56  
57  
58  
59  
60

For peer review only

### 1. Reagents and materials

- Methanol (HPLC grade)
- Hexane (HPLC grade)
- Ethanol (HPLC grade/AR grade)
- Normal saline solution (0.9% NaCl)
- Retinol acetate (as internal standard)
- Retinol (as external standard)
- CRM (Certified Reference Material) for serum retinol
- 15 ml centrifuge tube
- Vortex mixer
- Centrifuge (up to 4000 rpm capacity)
- Centrifuge tube rack
- Micropipettes (10-100 $\mu$ l and 100-1000 $\mu$ l)
- Micropipettes tips for both types
- Stopwatch
- HPLC Vials (1ml)

### 2. Instrument (HPLC) parameters – we have Shimadzu prominence HPLC.

- Detector - SPD-10A UV/VIS at 325 nm
- Column – SUPELCOSIL<sup>TM</sup>LC-NH<sub>2</sub>-NP, 25cm \* 4.6mm, 5 $\mu$ m
- Mobile phase – HPLC grade methanol
- Elution system – isocratic

### 3. Sample extraction procedure

- Add 200  $\mu$ l serum sample to 15ml plastic test tube.
- Add an equal volume of 50  $\mu$ g/dl retinol acetate and ethanol.
- Take 200  $\mu$ l of a series of standards (10, 20, 40, 60, 75  $\mu$ g/dl) to the 15 ml centrifuge tube and add the same volume of retinol acetate and normal saline solution.
- Mix the standard and sample solutions with a vortex mixer
- Add 1ml of HPLC grade hexane and mix for 45 seconds
- Centrifuge the solution at 4000rpm for 7 minutes and transfer the supernatant to other test tubes
- The solution has to be extract twice by adding 1 ml hexane.

- Dry the hexane using nitrogen gas and reconstitute by 500µl HPLC grade methanol
- It has to be mix for 30 minutes using a vortex mixer and transfer to 1 ml HPLC vials
- Analyze the extracted solutions using reversed-phase HPLC by isocratic elution system, at the flow rate of 1.5 ml/min, and injection volume 30µl

N: B: - Extract and analyse the CRM using the sample extraction procedure.

#### 4. Calculation

- Plot the calibration curve using area ratio of retinol (standard) and retinol acetate (internal standard) vs concentration ratio (retinol: retinol acetate).
- From the linear equation formula,  $Y = mx + b$ , the concentration of serum retinol can be calculated.

Where Y – is area ratio (retinol: retinol acetate) of sample

M – is slope and b – is Y intercept

X – is the concentration of serum retinol in µg/dl

#### 5. Reference

Quadro, Y.-K. K. and L. (2013). Reverse-Phase High-Performance Liquid Chromatography (HPLC) Analysis of Retinol and Retinyl Esters in Mouse Serum and Tissues. *Methods Mol Biol.* 2010; 652: 263–275. *Doi:10.1007/978-1-60327-325-1\_15.*, (12), 1–10. <https://doi.org/10.1007/978-1-60327-325-1>

von Lucke, A., Russell, R. M., Stephensen, C. B., Gannon, B. M., Craft, N. E., Haskell, M. J., ... Raiten, D. J. (2016). Biomarkers of Nutrition for Development (BOND)—Vitamin A Review. *The Journal of Nutrition*, 1816s-1848s. <https://doi.org/10.3945/jn.115.229708>.FIGURE

Prepared by: Nahom Tefera (September 2020)

Reviewed by: Meseret W/yohannis

Approved by: Dr. Masresha Tessema



|                                                                                   |                                                                   |                                                      |                                                       |
|-----------------------------------------------------------------------------------|-------------------------------------------------------------------|------------------------------------------------------|-------------------------------------------------------|
|  | Name of institute<br><br><b>ETHIOPIAN PUBLIC HEALTH INSTITUTE</b> | Doc. number:<br><br><b>EPHI/TL/FNL/T<br/>M7.2-17</b> | Version No: 3<br><br>Copy No. ____<br><br>Page 1 of 5 |
| Document Title: <b>DETERMINATION OF IODINE IN URINE</b>                           |                                                                   | Effective date: December, 2020                       |                                                       |

## 1 Scope

This test method is applicable for the determination of iodine from a urine sample.

## 2 Purpose

This procedure provides methods to control the amount of iodine and its toxicity by ammonium persulfate digestion with spectrophotometric detection of the Sandell-Kolthoff Reaction method from urine samples.

## 3 Principle

Urine is digested with ammonium persulfate. Iodide is the catalyst in the reduction of ceric ammonium sulfate (yellow) to cerous form (colorless) and is detected by the rate of color disappearance (Sandell-Kolthoff reaction).

## 4 Chemicals and Apparatus

### a) Chemicals

- Ammonium persulphate
- Arsenic trioxide
- Ceric ammonium sulphate
- Potassium iodate
- Deionized water
- Sodium chloride

### b) Apparatus

- Hot plate
- Oven
- UV-Vis spectrophotometer
- Volumetric flasks (100 – 2000 ml)
- Beakers (100- 1000 ml)

|                                                                                   |                                                                   |                                                      |                                                       |
|-----------------------------------------------------------------------------------|-------------------------------------------------------------------|------------------------------------------------------|-------------------------------------------------------|
|  | Name of institute<br><br><b>ETHIOPIAN PUBLIC HEALTH INSTITUTE</b> | Doc. number:<br><br><b>EPHI/TL/FNL/T<br/>M7.2-17</b> | Version No: 3<br><br>Copy No. ____<br><br>Page 2 of 5 |
| Document Title: <b>DETERMINATION OF IODINE IN URINE</b>                           |                                                                   | Effective date: December, 2020                       |                                                       |

- Micropipette (100 – 1000  $\mu$ l)
- Pipette (5 – 10 ml)
- Vortex mixer
- Measuring cylinder (100 – 1000 ml)
- Glass test tubes (13\*100 mm)
- Analytical balance (nearest to the 0.0001 g)
- Erlenmeyer flask (2000 ml)

## 5 Reagents preparation

### a) 1 M Ammonium persulphate

- Dissolve 114.1 g  $H_2 N_2 O_8 S_2$  in deionized water and makeup to 500 ml with  $H_2O$ . Store away from light. Stable for at least one month.

### b) 5 N $H_2SO_4$

- Slowly add 139 ml concentrated (36 N)  $H_2SO_4$  to about 700 ml deionized water (careful - this generates heat!). When cool, adjust with deionized water to a final volume of 1 liter.

### c) 3.5 N $H_2SO_4$

- Slowly add 97 ml concentrated (36 N)  $H_2SO_4$  to about 800 ml deionized water (careful - this generates heat!), and when cool, adjusting with deionized water to a final volume of 1 liter

### d) Ceric ammonium sulphate solution

- Dissolve 48 g ceric ammonium sulphate in 1 liter 3.5 N  $H_2SO_4$ . Store in a dark bottle away from light at room temperature. The solution is stable for months.

### e) Arsenious acid solution

- In a 2000 ml Erlenmeyer flask, place 20 g  $As_2O_3$  and 50 g NaCl, then slowly add 400 ml 5 N  $H_2SO_4$ . Add water to about 1 liter, heat gently to dissolve, cool to room temperature, dilute with water to 2 liters, filter, store in a dark bottle away from light at room temperature. The solution is stable for months.

|                                                                                   |                                                                   |                                                      |                                                       |
|-----------------------------------------------------------------------------------|-------------------------------------------------------------------|------------------------------------------------------|-------------------------------------------------------|
|  | Name of institute<br><br><b>ETHIOPIAN PUBLIC HEALTH INSTITUTE</b> | Doc. number:<br><br><b>EPHI/TL/FNL/T<br/>M7.2-17</b> | Version No: 3<br><br>Copy No. ____<br><br>Page 3 of 5 |
| Document Title: <b>DETERMINATION OF IODINE IN URINE</b>                           |                                                                   | Effective date: December, 2020                       |                                                       |

## 6 Standards preparation

### a) Stock standard solution (1 mg/ml)

- Dissolve 0.1685 g  $KIO_3$  in deionized water to a final volume of 100 ml (1.68 g  $KIO_3$  contains 1.0 g iodine).  $KIO_3$  is preferred over KI because it is more stable. It may be more convenient to make a more concentrated solution, e.g., 10 or 100 mg iodine/ml.

### b) Intermediate standard solution (1 $\mu$ g/ml)

- Dilute 100  $\mu$ l stock iodine standard (1mg/ml) to 100 ml deionized water. Store in a dark bottle. The solution is stable for months. Useful standards are 20, 50, 100, 150, 200, and 300  $\mu$ g/l.

### c) Serial standard dilutions

- From intermediate standards, prepare 50, 100, 150, 200, and 250  $\mu$ g/L useful standards for calibration curve purposes.

**Note:** All standard solutions should store in a dark place. The solutions are stable for months.

## 7 Procedures

- Mix urine to suspend sediment using a vortex mixer.
- Pipette 250  $\mu$ l of each urine sample into a 13 x 100 mm test tube.
- Pipette 250  $\mu$ l each iodine serial standards also into a test tube.
- Add 1 ml 1.0 M ammonium persulfate solution to each tube.
- Vortex all tubes using a vortex mixer
- Heat all tubes for 60 minutes at 100° C in the oven.
- Cool tubes to room temperature in a fume hood.
- Add 2.5 ml arsenious acid solution. Mix by a vortex. Let stand for 15 minutes.
- Add 300  $\mu$ l of ceric ammonium sulfate solution to each tube (quickly mixing) at 15-30 second intervals between successive tubes. A stopwatch should be used for this. With practice, a 20-second interval is convenient.

|                                                                                   |                                                                   |                                                      |                                    |
|-----------------------------------------------------------------------------------|-------------------------------------------------------------------|------------------------------------------------------|------------------------------------|
|  | Name of institute<br><br><b>ETHIOPIAN PUBLIC HEALTH INSTITUTE</b> | Doc. number:<br><br><b>EPHI/TL/FNL/T<br/>M7.2-17</b> | Version No: 3<br><br>Copy No. ____ |
| Document Title: <b>DETERMINATION OF IODINE IN URINE</b>                           |                                                                   | Effective date: December, 2020                       |                                    |

- Allow sitting at room temperature. Exactly 30 minutes after the addition of ceric ammonium sulfate to the first tube, read its absorbance by using UV-Vis spectrophotometer at 420 nm. Read successive tubes at the same interval as when adding the ceric ammonium sulfate.

## 8 Calculation

- Construct a standard curve on graph paper by plotting log absorbance of each concentration versus iodine concentration of each standard.
- Urinary Iodine in  $\mu\text{g/l} = ((\log A - b) / (m)) * 10$   
 Where log A is log absorbance of sample, b is Y-intercept of the calibration graph, m is the slope of the graph, and 10 is used as a conversion factor when we prepare serials of standards in  $\mu\text{g/dl}$  (in this case we multiply the final concentration ( $\mu\text{g/dl}$ ) by 10 to get the concentration in  $\mu\text{g/l}$ ).

## 9 Quality control and safety precautions

- In each batch, the urine quality control sample (CRM or in-house prepared) should run together with sample and standards.
- While working the urine analysis and reagent preparation wear gloves, lab coat, eye goggle, lab shoe, and mouth cover.

**Remember:** During the analysis of iodine from urine, you should ensure that the laboratory working environment should free from salt samples (especially iodized salt samples) to avoid contamination.

**Limitations:** If the urine sample is analyzed at a high temperature the loss of iodine occurred and the method has to detect very low iodine concentration in urine.

## 10 References

- ICCIDD, UNICEF, WHO. Dunn JT et al. Methods for measuring iodine in urine. The Netherlands, ICCIDD, 1993.

|                                                                                   |                                                                   |                                                      |                                     |
|-----------------------------------------------------------------------------------|-------------------------------------------------------------------|------------------------------------------------------|-------------------------------------|
|  | Name of institute<br><br><b>ETHIOPIAN PUBLIC HEALTH INSTITUTE</b> | Doc. number:<br><br><b>EPHI/TL/FNL/T<br/>M7.2-17</b> | Version No: 3<br><br>Copy No. _____ |
| Document Title: <b>DETERMINATION OF IODINE IN URINE</b>                           |                                                                   | Effective date: December, 2020                       |                                     |

Prepared by

Signature

Date

Prepared by: Nahom Tefera

\_\_\_\_\_

\_\_\_\_\_

Reviewed by: Meseret W/yohannes

\_\_\_\_\_

\_\_\_\_\_

Approved by: Dr. Masresha Tessema

\_\_\_\_\_

\_\_\_\_\_

000333795190c501V10.0

# AAGP2

**cobas**<sup>®</sup>

## Tina-quant $\alpha$ 1-Acid Glycoprotein Gen.2

### Order information

| REF          | CONTENT                                                 | Analyzer(s) on which <b>cobas c</b> pack(s) can be used                      |
|--------------|---------------------------------------------------------|------------------------------------------------------------------------------|
| 0333795 190  | Tina-quant $\alpha$ 1-Acid Glycoprotein Gen.2 100 tests | System-ID 07 6758 1 Roche/Hitachi <b>cobas c</b> 311, <b>cobas c</b> 501/502 |
| 11355279 216 | Calibrator f.a.s. Proteins (5 x 1 mL)                   | Code 656                                                                     |
| 11355279 160 | Calibrator f.a.s. Proteins (5 x 1 mL, for USA)          | Code 656                                                                     |
| 10557897 122 | Precinorm Protein (3 x 1 mL)                            | Code 302                                                                     |
| 10557897 160 | Precinorm Protein (3 x 1 mL, for USA)                   | Code 302                                                                     |
| 11333127 122 | Precipath Protein (3 x 1 mL)                            | Code 303                                                                     |
| 11333127 160 | Precipath Protein (3 x 1 mL, for USA)                   | Code 303                                                                     |
| 05117003 190 | PreciControl ClinChem Multi 1 (20 x 5 mL)               | Code 391                                                                     |
| 05947626 190 | PreciControl ClinChem Multi 1 (4 x 5 mL)                | Code 391                                                                     |
| 05947626 160 | PreciControl ClinChem Multi 1 (4 x 5 mL, for USA)       | Code 391                                                                     |
| 05117216 190 | PreciControl ClinChem Multi 2 (20 x 5 mL)               | Code 392                                                                     |
| 05947774 190 | PreciControl ClinChem Multi 2 (4 x 5 mL)                | Code 392                                                                     |
| 05947774 160 | PreciControl ClinChem Multi 2 (4 x 5 mL, for USA)       | Code 392                                                                     |
| 04489357 190 | Diluent NaCl 9 % (50 mL)                                | System-ID 07 6869 3                                                          |

### English

#### System information

For **cobas c** 311/501 analyzers:

**AAGP2**: ACN 229

For **cobas c** 502 analyzer:

**AAGP2**: ACN 8229

#### Intended use

In vitro test for the quantitative determination of  $\alpha$ <sub>1</sub>-acid glycoprotein in human serum and plasma on Roche/Hitachi **cobas c** systems.

#### Summary<sup>1,2,3,4,5</sup>

$\alpha$ <sub>1</sub>-Acid glycoprotein is synthesized in hepatocytes and consists of a polypeptide chain having 5 carbohydrate chains N-glycosidically bonded to it (molar mass 41000 daltons). Structurally, it belongs to the lipocalin superfamily of secretory proteins (such as  $\alpha$ <sub>1</sub>-microglobulin and retinol-binding protein).  $\alpha$ <sub>1</sub>-Acid glycoprotein promotes fibroblast growth and interacts with collagen.

It is a sensitive acute phase reactant whose concentration can increase by a factor of 3 within 24-48 hours when inflammation occurs.  $\alpha$ <sub>1</sub>-Acid glycoprotein can also be used to differentiate between acute phase reactions (elevated serum level) and estrogen effects (normal or decreased serum level) whereas the serum level of other positive reactants such as ceruloplasmin and haptoglobin increases during such reactions. Along with haptoglobin it is perhaps the best protein for identifying slight in vivo hemolysis. An increased  $\alpha$ <sub>1</sub>-acid glycoprotein level and normal haptoglobin values indicate an acute phase reaction with concomitant slight in vivo hemolysis. Moderate and isolated increases occur when glomerular filtration is inhibited in the early stages of uremia. The determination is used in the assessment of the activity of acute and recurring inflammations as well as of tumors with cell necrosis.

Various assay methods for  $\alpha$ <sub>1</sub>-acid glycoprotein determination are available such as kinetic nephelometry, radial immunodiffusion (RID) and turbidimetry. The Roche  $\alpha$ <sub>1</sub>-acid glycoprotein assay is based on the principle of immunological agglutination.

#### Test principle<sup>2</sup>

Immunoturbidimetric assay.

Anti- $\alpha$ <sub>1</sub>-acid glycoprotein antibodies react with antigen in the sample to form an antigen/antibody complex. Following agglutination, this is measured turbidimetrically.

#### Reagents - working solutions

**R1** TRIS buffer: 50 mmol/L, pH 8.0; NaCl: 300 mmol/L; PEG: 7 %; preservative; stabilizer

**R2** Polyclonal anti-human  $\alpha$ <sub>1</sub>-acid glycoprotein antibody (goat): dependent on titer; TRIS buffer: 13 mmol/L, pH 7.5; NaCl: 198 mmol/L; preservative

R1 is in position B and R2 is in position C.

#### Precautions and warnings

For in vitro diagnostic use.

Exercise the normal precautions required for handling all laboratory reagents.

Disposal of all waste material should be in accordance with local guidelines. Safety data sheet available for professional user on request.

For USA: Caution: Federal law restricts this device to sale by or on the order of a physician.

#### Reagent handling

Ready for use

#### Storage and stability

**AAGP2**

Shelf life at 2-8 °C: See expiration date on **cobas c** pack label.

On-board in use and refrigerated on the analyzer: 12 weeks

*Diluent NaCl 9 %*

Shelf life at 2-8 °C: See expiration date on **cobas c** pack label.

On-board in use and refrigerated on the analyzer: 12 weeks

#### Specimen collection and preparation

For specimen collection and preparation only use suitable tubes or collection containers.

Only the specimens listed below were tested and found acceptable. Serum

Plasma: Li-heparin and K<sub>2</sub>-EDTA plasma.

The sample types listed were tested with a selection of sample collection tubes that were commercially available at the time of testing, i.e. not all available tubes of all manufacturers were tested. Sample collection systems from various manufacturers may contain differing materials which could affect the test results in some cases. When processing samples in primary tubes (sample collection systems), follow the instructions of the tube manufacturer.

Centrifuge samples containing precipitates before performing the assay.

Stability:<sup>6</sup> < 72 hours at 4 °C

6 months at -20 °C

000333795190c501V10.0

# AAGP2

## Tina-quant $\alpha$ 1-Acid Glycoprotein Gen.2

**cobas**<sup>®</sup>

### Materials provided

See "Reagents – working solutions" section for reagents.

### Materials required (but not provided)

- See "Order information" section
- General laboratory equipment

### Assay

For optimum performance of the assay follow the directions given in this document for the analyzer concerned. Refer to the appropriate operator's manual for analyzer-specific assay instructions.

The performance of applications not validated by Roche is not warranted and must be defined by the user.

### Application for serum and plasma

#### cobas c 311 test definition

|                            |                            |                 |                |
|----------------------------|----------------------------|-----------------|----------------|
| Assay type                 | 2-Point End                |                 |                |
| Reaction time/Assay points | 10/6-32                    |                 |                |
| Wavelength (sub/main)      | 660/340 nm                 |                 |                |
| Reaction direction         | Increase                   |                 |                |
| Units                      | g/L ( $\mu$ mol/L, mg/dL)  |                 |                |
| Reagent pipetting          | Diluent (H <sub>2</sub> O) |                 |                |
| R1                         | 120 $\mu$ L                | –               |                |
| R2                         | 40 $\mu$ L                 | –               |                |
| Sample volumes             | Sample                     | Sample dilution |                |
|                            |                            | Sample          | Diluent (NaCl) |
| Normal                     | 12 $\mu$ L                 | 9 $\mu$ L       | 180 $\mu$ L    |
| Decreased                  | 12 $\mu$ L                 | 4 $\mu$ L       | 122 $\mu$ L    |
| Increased                  | 12 $\mu$ L                 | 9 $\mu$ L       | 180 $\mu$ L    |

#### cobas c 501 test definition

|                            |                            |                 |                |
|----------------------------|----------------------------|-----------------|----------------|
| Assay type                 | 2-Point End                |                 |                |
| Reaction time/Assay points | 10/10-48                   |                 |                |
| Wavelength (sub/main)      | 660/340 nm                 |                 |                |
| Reaction direction         | Increase                   |                 |                |
| Units                      | g/L ( $\mu$ mol/L, mg/dL)  |                 |                |
| Reagent pipetting          | Diluent (H <sub>2</sub> O) |                 |                |
| R1                         | 120 $\mu$ L                | –               |                |
| R2                         | 40 $\mu$ L                 | –               |                |
| Sample volumes             | Sample                     | Sample dilution |                |
|                            |                            | Sample          | Diluent (NaCl) |
| Normal                     | 12 $\mu$ L                 | 9 $\mu$ L       | 180 $\mu$ L    |
| Decreased                  | 12 $\mu$ L                 | 4 $\mu$ L       | 122 $\mu$ L    |
| Increased                  | 12 $\mu$ L                 | 9 $\mu$ L       | 180 $\mu$ L    |

#### cobas c 502 test definition

|                            |                            |                 |  |
|----------------------------|----------------------------|-----------------|--|
| Assay type                 | 2-Point End                |                 |  |
| Reaction time/Assay points | 10/10-48                   |                 |  |
| Wavelength (sub/main)      | 660/340 nm                 |                 |  |
| Reaction direction         | Increase                   |                 |  |
| Units                      | g/L ( $\mu$ mol/L, mg/dL)  |                 |  |
| Reagent pipetting          | Diluent (H <sub>2</sub> O) |                 |  |
| R1                         | 120 $\mu$ L                | –               |  |
| R2                         | 40 $\mu$ L                 | –               |  |
| Sample volumes             | Sample                     | Sample dilution |  |

|           |            | Sample     | Diluent (NaCl) |
|-----------|------------|------------|----------------|
| Normal    | 12 $\mu$ L | 9 $\mu$ L  | 180 $\mu$ L    |
| Decreased | 12 $\mu$ L | 4 $\mu$ L  | 122 $\mu$ L    |
| Increased | 12 $\mu$ L | 18 $\mu$ L | 180 $\mu$ L    |

### Calibration

|                       |                                                                                                                                                               |
|-----------------------|---------------------------------------------------------------------------------------------------------------------------------------------------------------|
| Calibrators           | S1: H <sub>2</sub> O<br>S2-S6: C.f.a.s. Proteins                                                                                                              |
|                       | Multiply the lot-specific C.f.a.s. Proteins calibrator value by the factors below to determine the standard concentrations for the 6-point calibration curve: |
|                       | S2: 0.140                      S5: 1.40                                                                                                                       |
|                       | S3: 0.280                      S6: 2.81                                                                                                                       |
|                       | S4: 0.700                                                                                                                                                     |
| Calibration mode      | RCM2                                                                                                                                                          |
| Calibration frequency | Full calibration<br>- after reagent lot change<br>- as required following quality control procedures                                                          |

Calibration interval may be extended based on acceptable verification of calibration by the laboratory.

Traceability: This method has been standardized against the reference preparation of the IRMM (Institute for Reference Materials and Measurements) BCR470/CRM470 (RPPHS - Reference Preparation for Proteins in Human Serum).<sup>7</sup>

### Quality control

For quality control, use control materials as listed in the "Order information" section.

In addition, other suitable control material can be used.

The control intervals and limits should be adapted to each laboratory's individual requirements. Values obtained should fall within the defined limits. Each laboratory should establish corrective measures to be taken if values fall outside the defined limits.

Follow the applicable government regulations and local guidelines for quality control.

### Calculation

Roche/Hitachi **cobas c** systems automatically calculate the analyte concentration of each sample.

|                     |                            |                    |
|---------------------|----------------------------|--------------------|
| Conversion factors: | g/L x 25 = $\mu$ mol/L     | mg/dL x 0.01 = g/L |
|                     | mg/dL x 0.25 = $\mu$ mol/L | g/L x 100 = mg/dL  |

### Limitations - interference

Criterion: Recovery within  $\pm$  10 % of initial value at an  $\alpha$ <sub>1</sub>-acid glycoprotein concentration of 0.5 g/L (12.5  $\mu$ mol/L, 50 mg/dL).

Icterus:<sup>8</sup> No significant interference up to an I index of 60 for conjugated and unconjugated bilirubin (approximate conjugated and unconjugated bilirubin concentration: 1026  $\mu$ mol/L or 60 mg/dL).

Hemolysis:<sup>8</sup> No significant interference up to an H index of 1000 (approximate hemoglobin concentration: 621  $\mu$ mol/L or 1000 mg/dL).

Lipemia (Intralipid):<sup>8</sup> No significant interference up to an L index of 650. There is poor correlation between the L index (corresponds to turbidity) and triglycerides concentration.

Rheumatoid factors up to 1200 IU/mL do not interfere.

High dose hook-effect: No false result occurs up to an  $\alpha$ <sub>1</sub>-acid glycoprotein concentration of 11 g/L (275  $\mu$ mol/L, 1100 mg/dL).

Drugs: No interference was found at therapeutic concentrations using common drug panels.<sup>9, 10</sup>

In very rare cases, gammopathy, in particular type IgM (Waldenström's macroglobulinemia), may cause unreliable results.<sup>11</sup>

000333795190c501V10.0

# AAGP2

## Tina-quant α1-Acid Glycoprotein Gen.2



For diagnostic purposes, the results should always be assessed in conjunction with the patient's medical history, clinical examination and other findings.

### ACTION REQUIRED

**Special Wash Programming:** The use of special wash steps is mandatory when certain test combinations are run together on Roche/Hitachi **cobas c** systems. The latest version of the carry-over evasion list can be found with the NaOHD-SMS-SmpCin1+2-SCCS Method Sheets. For further instructions refer to the operator's manual. **cobas c** 502 analyzer: All special wash programming necessary for avoiding carry-over is available via the **cobas** link, manual input is not required.

**Where required, special wash/carry-over evasion programming must be implemented prior to reporting results with this test.**

### Limits and ranges

#### Measuring range

0.1-4.0 g/L (2.5-100 µmol/L, 10-400 mg/dL)

Determine samples having higher concentrations via the rerun function. Dilution of samples via the rerun function is a 1:1.5 dilution. Results from samples diluted using the rerun function are automatically multiplied by a factor of 1.5.

#### Lower limits of measurement

##### Lower detection limit of the test

0.1 g/L (2.5 µmol/L, 10 mg/dL)

The lower detection limit represents the lowest measurable analyte level that can be distinguished from zero. It is calculated as the value lying 3 standard deviations above that of the lowest standard (standard 1 + 3 SD, repeatability, n = 21).

#### Expected values<sup>12</sup>

0.5-1.2 g/L (12.5-30 µmol/L, 50-120 mg/dL)

Each laboratory should investigate the transferability of the expected values to its own patient population and if necessary determine its own reference ranges.

#### Specific performance data

Representative performance data on the analyzers are given below. Results obtained in individual laboratories may differ.

#### Precision

Precision was determined using human samples and controls in an internal protocol with repeatability (n = 21) and intermediate precision (3 aliquots per run, 1 run per day, 21 days). The following results were obtained:

| Repeatability          | Mean                | SD                  | CV  |
|------------------------|---------------------|---------------------|-----|
|                        | g/L (µmol/L, mg/dL) | g/L (µmol/L, mg/dL) | %   |
| Precinorm Protein      | 0.724 (18.1, 72.4)  | 0.00 (0.0, 0.0)     | 0.6 |
| Precipath Protein      | 1.21 (30.3, 121)    | 0.01 (0.3, 1)       | 0.5 |
| Human serum 1          | 0.642 (16.1, 64.2)  | 0.00 (0.0, 0.0)     | 0.7 |
| Human serum 2          | 1.07 (26.8, 107)    | 0.01 (0.3, 1)       | 0.7 |
| Intermediate precision | Mean                | SD                  | CV  |
|                        | g/L (µmol/L, mg/dL) | g/L (µmol/L, mg/dL) | %   |
| Precinorm Protein      | 0.710 (17.8, 71.0)  | 0.007 (0.2, 1.0)    | 0.9 |
| Precipath Protein      | 1.19 (30.0, 119)    | 0.01 (0.3, 1)       | 0.9 |
| Human serum 3          | 0.660 (16.5, 66.0)  | 0.010 (0.3, 1.0)    | 1.5 |
| Human serum 4          | 1.21 (30.3, 121)    | 0.02 (0.5, 2)       | 1.5 |

#### Method comparison

α<sub>1</sub>-Acid glycoprotein values for human serum and plasma samples obtained on a Roche/Hitachi **cobas c** 501 analyzer (y) were compared with those determined using the corresponding reagent on a Roche/Hitachi 917 analyzer (x).

Sample size (n) = 119

Passing/Bablok<sup>13</sup> Linear regression

$$y = 1.012x - 0.070 \text{ g/L}$$

$$\tau = 0.973$$

$$y = 0.998x - 0.056 \text{ g/L}$$

$$r = 0.999$$

The sample concentrations were between 0.489 and 3.25 g/L (12.2 and 81.3 µmol/L, 48.9 and 325 mg/dL).

### References

- Schmid K. α<sub>1</sub>-Acid glycoprotein. In: The Plasma Proteins, 2nd ed. Putnam FW, ed. New York: Academic Press 1975;183-228.
- Greiling H, Gressner AM, eds. Lehrbuch der Klinischen Chemie und Pathobiochemie, 3rd ed. Stuttgart/New York: Schattauer Verlag 1995:236.
- Tietz NW, ed. Clinical Guide to Laboratory Tests, 3rd ed. Philadelphia, PA: WB Saunders Company 1995;66-67.
- Ganrot K. Plasma protein pattern in acute infectious disease. Scand J Clin Lab Invest 1974;34:75-81.
- Lievens M, Bienvenu J, Buitrago JMG, et al. Evaluation of four new Tina-quant assays for determination of α<sub>1</sub>-acid glycoprotein, α<sub>1</sub>-antitrypsin, haptoglobin and prealbumin. Clin Lab 1996;42:515-520.
- Wu AHB, ed. Tietz Clinical Guide to Laboratory Tests, 4th ed. St. Louis (MO): Saunders Elsevier 2006:42.
- Baudner S, Bienvenu J, Blirup-Jensen S, et al. The certification of a matrix reference material for immunochemical measurement of 14 human serum proteins CRM470. Report EUR 15243 EN 1993;1-186.
- Glick MR, Ryder KW, Jackson SA. Graphical Comparisons of Interferences in Clinical Chemistry Instrumentation. Clin Chem 1986;32:470-475.
- Breuer J. Report on the Symposium "Drug effects in Clinical Chemistry Methods". Eur J Clin Chem Clin Biochem 1996;34:385-386.
- Sonntag O, Scholer A. Drug interference in clinical chemistry: recommendation of drugs and their concentrations to be used in drug interference studies. Ann Clin Biochem 2001;38:376-385.
- Bakker AJ, Mücke M. Gammopathy interference in clinical chemistry assays: mechanisms, detection and prevention. Clin Chem Lab Med 2007;45(9):1240-1243.
- Dati F, Schumann G, Thomas L, et al. Consensus of a group of professional societies and diagnostic companies on guidelines for interim reference ranges for 14 proteins in serum based on the standardization against the IFCC/BCR/CAP reference material (CRM 470). Eur J Clin Chem Clin Biochem 1996;34:517-520.
- Bablok W, Passing H, Bender R, et al. A general regression procedure for method transformation. Application of linear regression procedures for method comparison studies in clinical chemistry, Part III. J Clin Chem Clin Biochem 1988 Nov;26(11):783-790.

A point (period/stop) is always used in this Method Sheet as the decimal separator to mark the border between the integral and the fractional parts of a decimal numeral. Separators for thousands are not used.

### Symbols

Roche Diagnostics uses the following symbols and signs in addition to those listed in the ISO 15223-1 standard (for USA: see <https://usdiagnostics.roche.com> for definition of symbols used):

CONTENT

Contents of kit

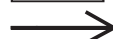

Volume after reconstitution or mixing

GTIN

Global Trade Item Number



000333795190c501V10.0

# AAGP2

## Tina-quant $\alpha$ 1-Acid Glycoprotein Gen.2



### FOR US CUSTOMERS ONLY: LIMITED WARRANTY

Roche Diagnostics warrants that this product will meet the specifications stated in the labeling when used in accordance with such labeling and will be free from defects in material and workmanship until the expiration date printed on the label. THIS LIMITED WARRANTY IS IN LIEU OF ANY OTHER WARRANTY, EXPRESS OR IMPLIED, INCLUDING ANY IMPLIED WARRANTY OF MERCHANTABILITY OR FITNESS FOR PARTICULAR PURPOSE. IN NO EVENT SHALL ROCHE DIAGNOSTICS BE LIABLE FOR INCIDENTAL, INDIRECT, SPECIAL OR CONSEQUENTIAL DAMAGES.

COBAS, COBAS C, PRECICONTROL, PRECINORM, PRECIPATH and TINA-QUANT are trademarks of Roche.

All other product names and trademarks are the property of their respective owners.

Additions, deletions or changes are indicated by a change bar in the margin.

© 2017, Roche Diagnostics

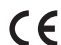

 Roche Diagnostics GmbH, Sandhofer Strasse 116, D-68305 Mannheim  
www.roche.com

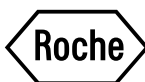

Distribution in USA by:  
Roche Diagnostics, Indianapolis, IN  
US Customer Technical Support 1-800-428-2336

For peer review only

1  
2  
3  
4  
5  
6  
7  
8  
9  
10  
11  
12  
13  
14  
15  
16  
17  
18  
19  
20  
21  
22  
23  
24  
25  
26  
27  
28  
29  
30  
31  
32  
33  
34  
35  
36  
37  
38  
39  
40  
41  
42  
43  
44  
45  
46  
47  
48  
49  
50  
51  
52  
53  
54  
55  
56  
57  
58  
59  
60

ms\_05894913190V7.0

# Vitamin D total



## 25-Hydroxyvitamin D

| REF          |     | SYSTEM                                                                              |
|--------------|-----|-------------------------------------------------------------------------------------|
| 05894913 190 | 100 | Elecsys 2010<br>MODULAR ANALYTICS E170<br>cobas e 411<br>cobas e 601<br>cobas e 602 |

### English

#### Intended use

This assay is intended for the quantitative determination of total 25-hydroxyvitamin D in human serum and plasma. This assay is to be used as an aid in the assessment of vitamin D sufficiency.

The electrochemiluminescence binding assay is intended for use on Elecsys and **cobas e** immunoassay analyzers.

#### Summary

Vitamin D is a fat-soluble steroid hormone precursor that is mainly produced in the skin by exposure to sunlight. Vitamin D is biologically inert and must undergo two successive hydroxylations in the liver and kidney to become the biologically active 1,25-dihydroxyvitamin D.<sup>1</sup>

The two most important forms of vitamin D are vitamin D<sub>3</sub> (cholecalciferol) and vitamin D<sub>2</sub> (ergocalciferol). In contrast to vitamin D<sub>3</sub>, the human body cannot produce vitamin D<sub>2</sub> which is taken up with fortified food or given by supplements. In human plasma vitamin D<sub>3</sub> and D<sub>2</sub> are bound to the vitamin D binding protein and transported to the liver where both are hydroxylated to form vitamin D (25-OH), i.e. 25-hydroxyvitamin D. It is commonly agreed that vitamin D (25-OH) is the metabolite to determine the overall vitamin D status as it is the major storage form of vitamin D in the human body. This primary circulating form of vitamin D is biologically inactive with levels approximately 1000-fold greater than the circulating 1,25-dihydroxyvitamin D. The half-life of circulating vitamin D (25-OH) is 2-3 weeks.

Most of the vitamin D (25-OH), measurable in serum, is vitamin D<sub>3</sub> (25-OH) whereas vitamin D<sub>2</sub> (25-OH) reaches measurable levels only in patients taking vitamin D<sub>2</sub> supplements.<sup>2,3,4</sup> Vitamin D<sub>2</sub> is considered to be less effective.<sup>5</sup>

Vitamin D is essential for bone health. In children, severe deficiency leads to bone-malformation, known as rickets. Milder degrees of insufficiency are believed to cause reduced efficiency in the utilization of dietary calcium.<sup>6</sup> Vitamin D deficiency causes muscle weakness; in elderly, the risk of falling has been attributed to the effect of vitamin D on muscle function.<sup>7</sup> Vitamin D deficiency is a common cause of secondary hyperparathyroidism.<sup>8,9</sup> Elevations of PTH levels, especially in elderly vitamin D deficient adults can result in osteomalacia, increased bone turnover, reduced bone mass and risk of bone fractures.<sup>10</sup> Low vitamin D (25-OH) concentrations are also associated with lower bone mineral density.<sup>11</sup> In conjunction with other clinical data, the results may be used as an aid in the assessment of bone metabolism.

So far, vitamin D has been shown to affect expression of over 200 different genes. Insufficiency has been linked to diabetes, different forms of cancer, cardiovascular disease, autoimmune diseases and innate immunity.<sup>2</sup>

The Elecsys Vitamin D total assay employs a vitamin D binding protein (VDBP) as capture protein to bind vitamin D<sub>3</sub> (25-OH) and vitamin D<sub>2</sub> (25-OH).

#### Test principle

Competition principle. Total duration of assay: 27 minutes.

- 1st incubation: By incubating the sample (15 µL) with pretreatment reagent 1 and 2, bound vitamin D (25-OH) is released from the vitamin D binding protein.
- 2nd incubation: By incubating the pretreated sample with the ruthenium labeled vitamin D binding protein, a complex between the vitamin D (25-OH) and the ruthenylated vitamin D binding protein is formed.

- 3rd incubation: After addition of streptavidin-coated microparticles and vitamin D (25-OH) labeled with biotin, unbound ruthenium labeled vitamin D binding proteins become occupied. A complex consisting of the ruthenylated vitamin D binding protein and the biotinylated vitamin D (25-OH) is formed and becomes bound to the solid phase via interaction of biotin and streptavidin.
- The reaction mixture is aspirated into the measuring cell where the microparticles are magnetically captured onto the surface of the electrode. Unbound substances are then removed with ProCell/ProCell M. Application of a voltage to the electrode then induces chemiluminescent emission which is measured by a photomultiplier.
- Results are determined via a calibration curve which is instrument-specifically generated by 2-point calibration and a master curve provided via the reagent barcode.

#### Reagents - working solutions

The reagent rackpack (M, R1, R2) and the pretreatment reagents (PT1, PT2) are labeled as VITD-T.

PT1 Pretreatment reagent 1 (white cap), 1 bottle, 4 mL:  
Dithiothreitol 1 g/L, pH 5.5.

PT2 Pretreatment reagent 2 (gray cap), 1 bottle, 4 mL:  
Sodium hydroxide 55 g/L.

M Streptavidin-coated microparticles (transparent cap), 1 bottle, 6.5 mL:  
Streptavidin-coated microparticles 0.72 mg/mL; preservative.

R1 Vitamin D binding protein-BPRu (gray cap), 1 bottle, 9 mL:  
Ruthenium labeled vitamin D binding protein 150 µg/L; bis-tris propane buffer 200 mmol/L; albumin (human) 25 g/L; pH 7.5; preservative.

R2 25-hydroxyvitamin D~biotin (black cap), 1 bottle, 8.5 mL:  
Biotinylated vitamin D (25-OH) 14 µg/L; bis-tris propane buffer 200 mmol/L; pH 8.6; preservative.

#### Precautions and warnings

For in vitro diagnostic use.  
Exercise the normal precautions required for handling all laboratory reagents.  
Disposal of all waste material should be in accordance with local guidelines. Safety data sheet available for professional user on request.

This kit contains components classified as follows in accordance with the Regulation (EC) No. 1272/2008:

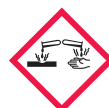

Danger

H290 May be corrosive to metals.

H314 Causes severe skin burns and eye damage.

#### Prevention:

P280 Wear protective gloves/ protective clothing/ eye protection/ face protection.

#### Response:

ms\_05894913190V7.0

# Vitamin D total



## 25-Hydroxyvitamin D

P303 + P361 IF ON SKIN (or hair): Remove/Take off immediately all contaminated clothing. Rinse skin with water/shower.  
+ P353

P304 + P340 IF INHALED: Remove person to fresh air and keep comfortable for breathing.  
+ P310 Immediately call a POISON CENTER or doctor/physician.

P305 + P351 IF IN EYES: Rinse cautiously with water for several minutes. Remove contact lenses, if present and easy to do.  
+ P338 + P310 Continue rinsing. Immediately call a POISON CENTER or doctor/physician.

Product safety labeling primarily follows EU GHS guidance.

Contact phone: all countries: +49-621-7590

All human material should be considered potentially infectious. All products derived from human blood are prepared exclusively from the blood of donors tested individually and shown to be free from HBsAg and antibodies to HCV and HIV. The testing methods applied were FDA-approved or cleared in compliance with the European Directive 98/79/EC, Annex II, List A.

However, as no testing method can rule out the potential risk of infection with absolute certainty, the material should be handled with the same level of care as a patient specimen. In the event of exposure, the directives of the responsible health authorities should be followed.<sup>12,13</sup>

Avoid foam formation in all reagents and sample types (specimens, calibrators and controls).

### Reagent handling

The reagents in the kit have been assembled into a ready-for-use unit that cannot be separated.

All information required for correct operation is read in from the respective reagent barcodes.

### Storage and stability

Store at 2-8 °C.

Do not freeze.

Store the Elecsys reagent kit **upright** in order to ensure complete availability of the microparticles during automatic mixing prior to use.

| Stability:                                                           |                                  |
|----------------------------------------------------------------------|----------------------------------|
| unopened at 2-8 °C                                                   | up to the stated expiration date |
| after opening at 2-8 °C                                              | 56 days (8 weeks)                |
| on Elecsys 2010 and <b>cobas e 411</b>                               | 21 days (3 weeks)                |
| on MODULAR ANALYTICS E170, <b>cobas e 601</b> and <b>cobas e 602</b> | 28 days (4 weeks)                |

### Specimen collection and preparation

Only the specimens listed below were tested and found acceptable.

Serum collected using standard sampling tubes or tubes containing separating gel.

Li-heparin, K<sub>2</sub>- and K<sub>3</sub>-EDTA plasma as well as Li-heparin plasma tubes containing separating gel.

Criterion: Method comparison serum versus plasma, slope 0.9-1.1 + intercept within  $< \pm 2 \times \text{LoB} + \text{coefficient of correlation} > 0.9$ .

Serum, Li-heparin, K<sub>2</sub>- and K<sub>3</sub>-EDTA plasma: Vitamin D (25-OH) is stable for 8 hours at 18-25 °C, 4 days at 2-8 °C, 24 weeks at -20 °C.

The stability of vitamin D (25-OH) found with the Elecsys Vitamin D total assay is in line with earlier studies using a vitamin D binding protein assay and mass spectrometry.<sup>14</sup>

The sample types listed were tested with a selection of sample collection tubes that were commercially available at the time of testing, i.e. not all available tubes of all manufacturers were tested. Sample collection systems from various manufacturers may contain differing materials which could affect the test results in some cases. When processing samples in primary tubes (sample collection systems), follow the instructions of the tube manufacturer.

Centrifuge samples containing precipitates before performing the assay.

Do not use heat-inactivated samples.

Do not use samples and controls stabilized with azide.

Ensure the samples, calibrators and controls are at 20-25 °C prior to measurement.

Due to possible evaporation effects, samples, calibrators and controls on the analyzers should be analyzed/measured within 2 hours.

### Materials provided

See "Reagents – working solutions" section for reagents.

### Materials required (but not provided)

- [REF] 05894921190, Vitamin D total CalSet, for 4 x 1 mL
  - [REF] 05618860190, PreciControl Varia, for 2 x 3 mL each of PreciControl Varia 1 and 2
  - [REF] 11732277122, Diluent Universal, 2 x 16 mL sample diluent or [REF] 03183971122, Diluent Universal, 2 x 36 mL sample diluent
  - General laboratory equipment
  - Elecsys 2010, MODULAR ANALYTICS E170 or **cobas e** analyzer
- Accessories for Elecsys 2010 and **cobas e 411** analyzers:
- [REF] 11662988122, ProCell, 6 x 380 mL system buffer
  - [REF] 11662970122, CleanCell, 6 x 380 mL measuring cell cleaning solution
  - [REF] 11930346122, Elecsys SysWash, 1 x 500 mL washwater additive
  - [REF] 11933159001, Adapter for SysClean
  - [REF] 11706802001, Elecsys 2010 AssayCup, 60 x 60 reaction vessels
  - [REF] 11706799001, Elecsys 2010 AssayTip, 30 x 120 pipette tips
- Accessories for MODULAR ANALYTICS E170, **cobas e 601** and **cobas e 602** analyzers:

- [REF] 04880340190, ProCell M, 2 x 2 L system buffer
  - [REF] 04880293190, CleanCell M, 2 x 2 L measuring cell cleaning solution
  - [REF] 03023141001, PC/CC-Cups, 12 cups to prewarm ProCell M and CleanCell M before use
  - [REF] 03005712190, ProbeWash M, 12 x 70 mL cleaning solution for run finalization and rinsing during reagent change
  - [REF] 03004899190, PreClean M, 5 x 600 mL detection cleaning solution
  - [REF] 12102137001, AssayTip/AssayCup Combimagazine M, 48 magazines x 84 reaction vessels or pipette tips, waste bags
  - [REF] 03023150001, WasteLiner, waste bags
  - [REF] 03027651001, SysClean Adapter M
- Accessories for all analyzers:
- [REF] 11298500316, ISE Cleaning Solution/Elecsys SysClean, 5 x 100 mL system cleaning solution

### Assay

For optimum performance of the assay follow the directions given in this document for the analyzer concerned. Refer to the appropriate operator's manual for analyzer-specific assay instructions.

Resuspension of the microparticles takes place automatically prior to use. Read in the test-specific parameters via the reagent barcode. If in exceptional cases the barcode cannot be read, enter the 15-digit sequence of numbers.

MODULAR ANALYTICS E170, **cobas e 601** and **cobas e 602** analyzers: PreClean M solution is necessary.

Bring the cooled reagents to approximately 20 °C and place on the reagent disk (20 °C) of the analyzer. Avoid foam formation. The system automatically regulates the temperature of the reagents and the opening/closing of the bottles.

### Calibration

Traceability: This method has been standardized against LC-MS/MS<sup>15</sup> which in turn has been standardized to the NIST standard.<sup>16</sup>

Every Elecsys reagent set has a barcoded label containing specific information for calibration of the particular reagent lot. The predefined master curve is adapted to the analyzer using the relevant CalSet.

ms\_05894913190V7.0

# Vitamin D total



## 25-Hydroxyvitamin D

**Calibration frequency:** Calibration must be performed once per reagent lot using fresh reagent (i.e. not more than 24 hours since the reagent kit was registered on the analyzer). Renewed calibration is recommended as follows:

- after 1 month (28 days) when using the same reagent lot
- after 7 days (when using the same reagent kit on the analyzer)
- as required: e.g. quality control findings outside the defined limits

### Quality control

For quality control, use PreciControl Varia.

In addition, other suitable control material can be used.

Controls for the various concentration ranges should be run individually at least once every 24 hours when the test is in use, once per reagent kit, and following each calibration.

The control intervals and limits should be adapted to each laboratory's individual requirements. Values obtained should fall within the defined limits. Each laboratory should establish corrective measures to be taken if values fall outside the defined limits.

Follow the applicable government regulations and local guidelines for quality control.

### Calculation

The analyzer automatically calculates the analyte concentration of each sample (either in ng/mL or nmol/L).

Conversion factors:  $\text{nmol/L} \times 0.40 = \text{ng/mL}$   
 $\text{ng/mL} \times 2.50 = \text{nmol/L}$

### Limitations - interference

Samples showing visible signs of hemolysis may cause interference.

Hemoglobin concentrations  $> 2 \text{ g/L}$  ( $> 0.124 \text{ mmol/L}$ ) may lead to elevated results.

The assay is unaffected by icterus (bilirubin  $< 1129 \mu\text{mol/L}$  or  $< 66 \text{ mg/dL}$ ), lipemia (Intralipid  $< 400 \text{ mg/dL}$ ) and biotin ( $< 287 \text{ nmol/L}$  or  $< 70 \text{ ng/mL}$ ).

Criterion: For concentrations from LoQ up to  $15 \text{ ng/mL}$ , deviation is  $\leq 1.5 \text{ ng/mL}$ ; for concentrations  $> 15 \text{ ng/mL}$ , deviation is  $\leq 10 \%$ .

Samples should not be taken from patients receiving therapy with high biotin doses (i.e.  $> 5 \text{ mg/day}$ ) until at least 8 hours following the last biotin administration.

In vitro tests were performed on 17 commonly used pharmaceuticals and 5 special therapeutic drugs (Bonviva (Ibandronate), EinsAlpha (Alfacalcidol), Fosamax (Alendronate), Pamidron HEXAL (Pamidronate) and Zometa (Zoledronate)). No interference with the assay was found.

In rare cases, interference due to extremely high titers of antibodies to analyte-specific antibodies, streptavidin or ruthenium can occur. These effects are minimized by suitable test design.

For diagnostic purposes, the results should always be assessed in conjunction with the patient's medical history, clinical examination and other findings.

### Limits and ranges

#### Measuring range

$3.00\text{-}70.0 \text{ ng/mL}$  or  $7.50\text{-}175 \text{ nmol/L}$  (defined by the Limit of Detection and the maximum of the master curve). Values below the Limit of Detection are reported as  $< 3.00 \text{ ng/mL}$  ( $< 7.50 \text{ nmol/L}$ ). Values above the measuring range are reported as  $> 70.0 \text{ ng/mL}$  ( $> 175 \text{ nmol/L}$ ).

#### Lower limits of measurement

Limit of Blank (LoB), Limit of Detection (LoD) and Limit of Quantitation (LoQ)

Limit of Blank =  $2.00 \text{ ng/mL}$  ( $5.00 \text{ nmol/L}$ )

Limit of Detection =  $3.00 \text{ ng/mL}$  ( $7.50 \text{ nmol/L}$ )

Limit of Quantitation =  $5.00 \text{ ng/mL}$  ( $12.5 \text{ nmol/L}$ ) with a total allowable relative error of  $\leq 30 \%$

The Limit of Blank, Limit of Detection and Limit of Quantitation were determined in accordance with the CLSI (Clinical and Laboratory Standards Institute) EP17-A requirements.

The Limit of Blank is the 95<sup>th</sup> percentile value from  $n \geq 60$  measurements of analyte-free samples over several independent series. The Limit of Blank

corresponds to the concentration below which analyte-free samples are found with a probability of 95 %.

The Limit of Detection is determined based on the Limit of Blank and the standard deviation of low concentration samples. The Limit of Detection corresponds to the lowest analyte concentration which can be detected (value above the Limit of Blank with a probability of 95 %).

The Limit of Quantitation is defined as the lowest amount of analyte in a sample that can be accurately quantitated with a total allowable relative error of  $\leq 30 \%$ .

The total error concept describes the maximum possible error of a test result taking into account the imprecision (SD) and inaccuracy (bias) of the test system. The Total Error (TE) was determined using the RMS (Root Mean Square) model (CLSI EP17-A2). The relative allowable total error refers to the respective concentration of the sample.

### Dilution

Samples with vitamin D (25-OH) concentrations above the measuring range can be manually diluted with Diluent Universal or a suitable human serum with a low analyte concentration. The recommended dilution is 1:2. The concentration of the diluted sample must be  $> 30.0 \text{ ng/mL}$  ( $> 75.0 \text{ nmol/L}$ ). After manual dilution, multiply the results by the dilution factor 2. The endogenous analyte concentration of the human serum used for dilution has to be taken into account.

### Expected values

Due to different standardizations between methods, result variation may arise. Clinical assessment should be taken into consideration when interpreting results.

#### Health based reference values (recommended for use):

Currently there is no standard definition of the optimal vitamin D status. Many specialists consider the commonly used population based reference values too low. Health based reference values are recommended to replace population based reference values.<sup>17</sup>

Most experts agree that vitamin D deficiency should be defined as vitamin D (25-OH) of  $\leq 20 \text{ ng/mL}$  ( $\leq 50 \text{ nmol/L}$ ).<sup>18</sup> Vitamin D insufficiency is recognized as  $21\text{-}29 \text{ ng/mL}$ .<sup>18</sup> Similarly, the US National Kidney Foundation considers levels  $< 30 \text{ ng/mL}$  to be insufficient or deficient.<sup>19</sup>

The preferred level for vitamin D (25-OH) by many experts is now recommended to be  $\geq 30 \text{ ng/mL}$  ( $\geq 75 \text{ nmol/L}$ ).<sup>18,20,21,22</sup>

#### Reference values measured in an apparently healthy population:

It should be taken into consideration that differences in vitamin D (25-OH) levels may exist with respect to gender, age, season, geographical latitude and ethnic groups.<sup>18,20</sup>

Each laboratory should investigate the transferability of the expected values to its own patient population and if necessary determine its own reference ranges.

Population based reference ranges should not be taken as clinical cutoff to recommend or dissuade from vitamin D supplementation. Guidance for supplementation should be taken from recent literature.<sup>18,19</sup>

A reference range study was conducted with samples from apparently healthy individuals of Caucasian heritage. The age range was 20-77 years. Samples were collected between November and July in northern Germany.

The values given are for information only and may vary from other published data.

|                               | Gender           |        |                     |        |                   |        |
|-------------------------------|------------------|--------|---------------------|--------|-------------------|--------|
|                               | All<br>(n = 453) |        | Female<br>(n = 252) |        | Male<br>(n = 201) |        |
| Unit                          | ng/mL            | nmol/L | ng/mL               | nmol/L | ng/mL             | nmol/L |
| Mean                          | 20.6             | 51.5   | 21.6                | 54.0   | 19.4              | 48.5   |
| 2.5 <sup>th</sup> percentile  | 5.26             | 13.2   | 6.23                | 15.6   | 4.92              | 12.3   |
| 97.5 <sup>th</sup> percentile | 47.0             | 118    | 49.9                | 125    | 42.7              | 107    |

A lower recovery may be found in particular clinical cohorts, for example dialysis patients.<sup>23</sup>

### Specific performance data

Representative performance data on the analyzers are given below. Results obtained in individual laboratories may differ.

ms\_05894913190V7.0

# Vitamin D total

## 25-Hydroxyvitamin D



### Precision

Precision was determined using Elecsys reagents, pooled human sera and controls in a protocol (EP5-A2) of the CLSI (Clinical and Laboratory Standards Institute): 2 runs per day in duplication each for 21 days (n = 84). The following results were obtained:

| Elecsys 2010 and cobas e 411 analyzers |       |        |               |        |     |
|----------------------------------------|-------|--------|---------------|--------|-----|
| Sample                                 | Mean  |        | Repeatability |        |     |
|                                        |       |        | SD            |        | CV  |
|                                        | ng/mL | nmol/L | ng/mL         | nmol/L | %   |
| HS <sup>a)</sup> 1                     | 6.76  | 16.9   | 0.525         | 1.31   | 7.8 |
| HS 2                                   | 15.0  | 37.5   | 0.770         | 1.93   | 5.1 |
| HS 3                                   | 28.0  | 70.0   | 0.860         | 2.15   | 3.1 |
| HS 4                                   | 67.0  | 168    | 1.15          | 2.88   | 1.7 |
| PC <sup>b)</sup> Varia 1               | 19.9  | 49.8   | 0.948         | 2.37   | 4.8 |
| PC Varia 2                             | 38.3  | 95.8   | 1.05          | 2.63   | 2.7 |

a) HS = human serum

b) PC = PreciControl

| Elecsys 2010 and cobas e 411 analyzers |       |        |                        |        |      |
|----------------------------------------|-------|--------|------------------------|--------|------|
| Sample                                 | Mean  |        | Intermediate precision |        |      |
|                                        |       |        | SD                     |        | CV   |
|                                        | ng/mL | nmol/L | ng/mL                  | nmol/L | %    |
| HS 1                                   | 6.76  | 16.9   | 0.724                  | 1.81   | 10.7 |
| HS 2                                   | 15.0  | 37.5   | 1.28                   | 3.20   | 8.5  |
| HS 3                                   | 28.0  | 70.0   | 1.46                   | 3.65   | 5.2  |
| HS 4                                   | 67.0  | 168    | 1.46                   | 3.65   | 2.2  |
| PC Varia 1                             | 19.9  | 49.8   | 1.23                   | 3.08   | 6.2  |
| PC Varia 2                             | 38.3  | 95.8   | 1.41                   | 3.53   | 3.7  |

| MODULAR ANALYTICS E170, cobas e 601 and cobas e 602 analyzers |       |        |               |        |     |
|---------------------------------------------------------------|-------|--------|---------------|--------|-----|
| Sample                                                        | Mean  |        | Repeatability |        |     |
|                                                               |       |        | SD            |        | CV  |
|                                                               | ng/mL | nmol/L | ng/mL         | nmol/L | %   |
| HS 1                                                          | 8.35  | 20.9   | 0.567         | 1.42   | 6.8 |
| HS 2                                                          | 15.8  | 39.5   | 0.824         | 2.06   | 5.2 |
| HS 3                                                          | 28.3  | 70.8   | 1.11          | 2.78   | 3.9 |
| HS 4                                                          | 69.6  | 174    | 1.50          | 3.75   | 2.2 |
| PC Varia 1                                                    | 20.2  | 50.5   | 0.924         | 2.31   | 4.6 |
| PC Varia 2                                                    | 39.6  | 99.0   | 1.06          | 2.65   | 2.7 |

| MODULAR ANALYTICS E170, cobas e 601 and cobas e 602 analyzers |       |        |                        |        |      |
|---------------------------------------------------------------|-------|--------|------------------------|--------|------|
| Sample                                                        | Mean  |        | Intermediate precision |        |      |
|                                                               |       |        | SD                     |        | CV   |
|                                                               | ng/mL | nmol/L | ng/mL                  | nmol/L | %    |
| HS 1                                                          | 8.35  | 20.9   | 1.10                   | 2.75   | 13.1 |
| HS 2                                                          | 15.8  | 39.5   | 1.18                   | 2.95   | 7.5  |
| HS 3                                                          | 28.3  | 70.8   | 1.83                   | 4.58   | 6.5  |
| HS 4                                                          | 69.6  | 174    | 2.37                   | 5.93   | 3.4  |
| PC Varia 1                                                    | 20.2  | 50.5   | 0.954                  | 2.39   | 4.7  |
| PC Varia 2                                                    | 39.6  | 99.0   | 1.38                   | 3.45   | 3.5  |

### Method comparison

1) A comparison of the Elecsys Vitamin D total assay (y) using samples measured with LC-MS/MS (x) gave the following correlations (ng/mL):

Number of samples measured: 903

Passing/Bablok<sup>24</sup>  $y = 1.09x - 0.510$

Pearson  $r = 0.894$

The sample concentrations were between approximately 3 ng/mL (7.5 nmol/L) and 81 ng/mL (203 nmol/L).

2) A comparison of the Elecsys Vitamin D total assay (y) using samples measured with a commercially available vitamin D (25-OH) immunoassay (x) gave the following correlations (ng/mL):

Number of samples measured: 451

Passing/Bablok<sup>24</sup>  $y = 1.29x + 1.71$

Pearson  $r = 0.803$

The sample concentrations were between approximately 5 ng/mL (12.5 nmol/L) and 81 ng/mL (203 nmol/L).

### Analytical specificity

The specificity was assessed at 50 % B<sub>0</sub> and the results are summarized in the following table:

| Cross-reactant                                | Cross-reactivity (%) |
|-----------------------------------------------|----------------------|
| 25-hydroxyvitamin D <sub>3</sub>              | 100                  |
| 25-hydroxyvitamin D <sub>2</sub>              | 92                   |
| 24,25-dihydroxyvitamin D <sub>3</sub>         | 149                  |
| C3-epimer of 25-hydroxyvitamin D <sub>3</sub> | 91                   |
| 1,25-dihydroxyvitamin D <sub>3</sub>          | non detectable       |
| 1,25-dihydroxyvitamin D <sub>2</sub>          | non detectable       |
| Vitamin D <sub>3</sub>                        | non detectable       |
| Vitamin D <sub>2</sub>                        | non detectable       |

### Functional sensitivity

The functional sensitivity is the lowest analyte concentration that can be reproducibly measured with an intermediate precision CV of ≤ 20 %. 8 samples with concentrations between 0.722 ng/mL and 10.1 ng/mL were measured on several days. The functional sensitivity was determined to be 4.01 ng/mL (CV 18.5 %).

### References

- Holick M. Vitamin D: the underappreciated D-lightful hormone that is important for skeletal and cellular health. *Curr Opin Endocrinol Diabetes* 2002;9(1):87-98.
- Holick MF. Vitamin D deficiency. *N Engl J Med* 2007;357:266-281.
- Houghton LA, Vieth R. The case against ergocalciferol (vitamin D<sub>2</sub>) as a vitamin supplement. *Am J Clin Nutr* 2006;84:694-697.
- Hart GR, Furniss JL, Laurie D, et al. Measurement of vitamin D Status: background, clinical use and methodologies. *Clin Lab* 2006;52(7-8):335-343.
- Armas LAG, Hollis BW, Heaney RP. Vitamin D<sub>2</sub> is much less effective than Vitamin D<sub>3</sub> in humans. *J Clin Endocrinol Metab* 2004;89(11):5387-5391.
- Steingrimsdottir L, Gunnarsson O, Indridason OS, et al. Relationship between serum parathyroid hormone levels, vitamin D sufficiency, and calcium intake. *JAMA* 2005 Nov 9;294(18):2336-2341.
- Venning G. Recent developments in vitamin D deficiency and muscle weakness among elderly people. *BMJ* 2005;330:524-526.
- Lips P. Vitamin D deficiency and secondary hyperparathyroidism in the elderly: consequences for bone loss and fractures and therapeutic implications. *Endocr Rev* 2001 Aug;22(4):447-501.
- Souberbielle JC, Lawson-Body E, Hammadi B, et al. The use in clinical practice of parathyroid hormone normative values established in vitamin D-sufficient subjects. *J Clin Endocrinol Metab* 2003 Aug;88(8):3501-3504.
- Willett AM. Vitamin D status and its relationship with parathyroid hormone and bone mineral status in older adolescents. *Proceeding of the Nutrition Society* 2005;64:193-203.

ms\_05894913190V7.0

# Vitamin D total



## 25-Hydroxyvitamin D

- 11 Kuchukk NO, van Schoor NM, Pluijm SM, et al. Vitamin D status, parathyroid function, bone turnover, and BMD in postmenopausal women with osteoporosis: global perspective. *J Bone Miner Res* 2009;24:693-701.
- 12 Occupational Safety and Health Standards: Bloodborne pathogens. (29 CFR Part 1910.1030). Fed. Register.
- 13 Directive 2000/54/EC of the European Parliament and Council of 18 September 2000 on the protection of workers from risks related to exposure to biological agents at work.
- 14 Lewis JG, Elder PA. Serum 25-OH Vitamin D2 and D3 are Stable under Exaggerated Conditions. *Clin Chem* 2008;54:1931-1932.
- 15 Vogeser M, Kyriatsoulis A, Huber E, et al. Candidate Reference Method for the Quantification of Circulating 25-Hydroxyvitamin D3 by Liquid Chromatography-Tandem Mass Spectrometry. *Clin Chem* 2004;50:1415-1417.
- 16 Phinney KW. Development of a standard reference material for vitamin D in serum. *Am J Clin Nutr* 2008;88(suppl):511-512.
- 17 Bischoff-Ferrari HA, Giovannucci E, Willett WC, et al. Estimation of optimal serum concentrations of 25-hydroxyvitamin D for multiple health outcomes. *Am J Clin Nutr* 2006;84:18-28.
- 18 Holick MF. Vitamin D status: measurement, interpretation, and clinical application. *Ann Epidemiol* 2009;19(2):73-78.
- 19 KDOQI Clinical Practice Guidelines for Bone Metabolism and Disease in Children With Chronic Kidney Disease. [http://www.kidney.org/PROFESSIONALS/kdoqi/guidelines\\_pedbone/guide8.htm](http://www.kidney.org/PROFESSIONALS/kdoqi/guidelines_pedbone/guide8.htm)
- 20 Souberbielle JC, Body JJ, Lappe JM, et al. Vitamin D and musculoskeletal health, cardiovascular disease, autoimmunity and cancer: Recommendations for clinical practice. *Autoimmun Rev* 2010;9:709-715.
- 21 Dawson-Hughes B, Heaney RP, Holick MF, et al. Estimates of optimal vitamin D status. *Osteoporos Int* 2005;16:713-716.
- 22 Vieth R. Why the minimum desirable serum 25-hydroxyvitamin D level should be 75 nmol/L (30 ng/mL). *Best Pract Res Clin Endocrinol Metab* 2011;25(4):681-691.
- 23 Heijboer AC, Blankenstein MA, Kema IP, et al. Accuracy of 6 routine 25-hydroxyvitamin D assays: influence of vitamin D binding protein concentration. *Clin Chem* 2012;58:543-548.
- 24 Bablok W, Passing H, Bender R, et al. A general regression procedure for method transformation. Application of linear regression procedures for method comparison studies in clinical chemistry, Part III. *J Clin Chem Clin Biochem* 1988 Nov;26(11):783-790.

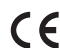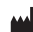

Roche Diagnostics GmbH, Sandhofer Strasse 116, D-68305 Mannheim  
www.roche.com

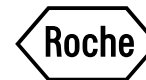

For further information, please refer to the appropriate operator's manual for the analyzer concerned, the respective application sheets, the product information and the Method Sheets of all necessary components (if available in your country).

A point (period/stop) is always used in this Method Sheet as the decimal separator to mark the border between the integral and the fractional parts of a decimal numeral. Separators for thousands are not used.

### Symbols

Roche Diagnostics uses the following symbols and signs in addition to those listed in the ISO 15223-1 standard.

|  |                                                     |
|--|-----------------------------------------------------|
|  | Contents of kit                                     |
|  | Analyzers/Instruments on which reagents can be used |
|  | Reagent                                             |
|  | Calibrator                                          |
|  | Volume after reconstitution or mixing               |
|  | Global Trade Item Number                            |

COBAS, COBAS E, ELECSYS and PRECICONTROL are trademarks of Roche. INTRALIPID is a trademark of Fresenius Kabi AB.

All other product names and trademarks are the property of their respective owners.

Additions, deletions or changes are indicated by a change bar in the margin.

© 2015, Roche Diagnostics

ms\_07212771190V1.0

# Vitamin B12 II



## Vitamin B12

| REF          |     | SYSTEM                                                                                                   |
|--------------|-----|----------------------------------------------------------------------------------------------------------|
| 07212771 190 | 100 | Elecsys 2010<br>MODULAR ANALYTICS E170<br><b>cobas e 411</b><br><b>cobas e 601</b><br><b>cobas e 602</b> |

### English

#### Intended use

Binding assay for the in vitro quantitative determination of vitamin B12 in human serum and plasma.

The electrochemiluminescence immunoassay "ECLIA" is intended for use on Elecsys and **cobas e** immunoassay analyzers.

#### Summary

Vitamin B12, also referred to as cobalamin, is a complex organometallic compound in which a cobalt atom is situated within a corrin ring. It is a water-soluble vitamin which is synthesized by microorganisms. It cannot be synthesized in the human body and is seldom found in products of plant origin. Main sources of vitamin B12 are meat, fish, eggs and dairy products.

<sup>1</sup> The uptake in the gastrointestinal tract depends on intrinsic factor, which is synthesized by the gastric parietal cells, and on the "cobalamin receptor" in the distal ileum. The most frequent cause of severe vitamin B12 deficiency is a lack of intrinsic factor due to autoimmune atrophic gastritis. The disease is historically called "pernicious anemia", even though many patients present with mainly neurologic manifestations. Examples of other causes for vitamin B12 deficiency are malabsorption due to gastrectomy, inflammatory bowel disease or dietary deficiency, e.g. in strict vegetarians (vegans).<sup>2</sup>

Vitamin B12 is the cofactor for two enzymes, methionine synthase and methylmalonyl CoA mutase.<sup>2,3</sup> Methionine synthase, located in the cytoplasm, requires vitamin B12 in the form of methylcobalamin and catalyzes the conversion of homocysteine to methionine, an essential amino acid. During this step a methyl group is transferred from methyltetrahydrofolate to the amino acid.<sup>3</sup> This enzyme links the methylation pathway through synthesis of the methyl donor S-Adenosyl methionine and the pathway in which purine and pyrimidine are synthesized via generation of tetrahydrofolate.<sup>3</sup> In the form of 5'-deoxyadenosylcobalamin, vitamin B12 is also required for the mitochondrial enzyme methylmalonyl CoA mutase, which converts methylmalonyl CoA to succinyl CoA. This is a step in the oxidation of odd-chain fatty acids and catabolism of ketogenic amino acids.<sup>3</sup> Thus, vitamin B12 is important for DNA synthesis, regenerating methionine for protein synthesis and methylation, as well as for the development and initial myelination of the central nervous system (CNS) and for the maintenance of normal CNS function.<sup>2,3</sup>

Vitamin B12 deficiencies are common in wealthier countries principally among the elderly and are most prevalent in poorer populations. In general the prevalence increases with age.<sup>4,5</sup>

Vitamin B12 deficiency impacts red blood cell synthesis, resulting in megaloblastic anemia due to abnormal DNA synthesis.<sup>3</sup> In addition it impairs neurological function, in particular demyelination of nerves in part due to abnormal methylation, leading to peripheral neuropathy, dementia, poor cognitive performance, and depression.<sup>3</sup> Other effects of vitamin B12 deficiency or depletion are increased risk of neural tube defects, osteoporosis, cerebrovascular and cardiovascular diseases.<sup>3</sup> Early diagnosis is essential, because of the latent nature of this disorder and the risk of permanent neurological damage.<sup>3,5</sup>

Generally, the primary test performed to confirm the diagnosis of vitamin B12 deficiency is measurement of serum vitamin B12 level.<sup>2</sup> Recent publications suggest that in addition the following biomarkers should be measured to improve the specificity of diagnosis: folate, methylmalonic acid (MMA), homocysteine and holotranscobalamin.<sup>2,5,6,7</sup>

The Elecsys Vitamin B12 II assay employs a competitive test principle using intrinsic factor specific for vitamin B12. Vitamin B12 in the sample competes with the added vitamin B12 labeled with biotin for the binding sites on the ruthenium-labeled intrinsic factor complex<sup>a)</sup>.

a) Tris(2,2'-bipyridyl)ruthenium(II)-complex (Ru(bpy)<sub>3</sub><sup>2+</sup>)

### Test principle

Competition principle. Total duration of assay: 27 minutes.

- 1st incubation: By incubating the sample (15 µL) with the vitamin B12 pretreatment 1 and pretreatment 2, bound vitamin B12 is released.
- 2nd incubation: By incubating the pretreated sample with the ruthenium labeled intrinsic factor, a vitamin B12-binding protein complex is formed, the amount of which is dependent upon the analyte concentration in the sample.
- 3rd incubation: After addition of streptavidin-coated microparticles and vitamin B12 labeled with biotin, the still-vacant sites of the ruthenium labeled intrinsic factor become occupied, with formation of a ruthenium labeled intrinsic factor vitamin B12 biotin complex. The entire complex becomes bound to the solid phase via interaction of biotin and streptavidin.
- The reaction mixture is aspirated into the measuring cell where the microparticles are magnetically captured onto the surface of the electrode. Unbound substances are then removed with ProCell/ProCell M. Application of a voltage to the electrode then induces chemiluminescent emission which is measured by a photomultiplier.
- Results are determined via a calibration curve which is instrument-specifically generated by 2-point calibration and a master curve provided via the reagent barcode.

### Reagents - working solutions

The reagent rackpack (M, R1, R2) and the pretreatment reagents (PT1, PT2) are labeled as B12 II.

PT1 Pretreatment reagent 1 (white cap), 1 bottle, 4 mL:

Dithiothreitol 1.028 g/L; stabilizer, pH 5.5.

PT2 Pretreatment reagent 2 (gray cap), 1 bottle, 4 mL:

Sodium hydroxide 40 g/L; sodium cyanide 2.205 g/L.

M Streptavidin-coated microparticles (transparent cap), 1 bottle, 6.5 mL:

Streptavidin-coated microparticles 0.72 mg/mL; preservative.

R1 Intrinsic factor-Ru(bpy)<sub>3</sub><sup>2+</sup> (gray cap), 1 bottle, 10 mL:

Ruthenium labeled recombinant porcine intrinsic factor 4 µg/L; cobinamide dicyanide 15 µg/L; stabilizer; human serum albumin; phosphate buffer, pH 5.5; preservative.

R2 Vitamin B12-biotin (black cap), 1 bottle, 8.5 mL:

Biotinylated vitamin B12 25 µg/L; biotin 3 µg/L; phosphate buffer, pH 7.0; preservative.

### Precautions and warnings

For in vitro diagnostic use.

Exercise the normal precautions required for handling all laboratory reagents.

Disposal of all waste material should be in accordance with local guidelines. Safety data sheet available for professional user on request.

This kit contains components classified as follows in accordance with the Regulation (EC) No. 1272/2008:

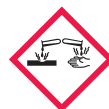

Danger

ms\_07212771190V1.0

# Vitamin B12 II



## Vitamin B12

- H290 May be corrosive to metals.
- H314 Causes severe skin burns and eye damage.
- H412 Harmful to aquatic life with long lasting effects.
- Prevention:**
- P234 Keep only in original container.
- P264 Wash skin thoroughly after handling.
- P273 Avoid release to the environment.
- P280 Wear protective gloves/ protective clothing/ eye protection/ face protection.

### Response:

- P301 + P330 IF SWALLOWED: Rinse mouth. Do NOT induce vomiting.  
+ P331
- P303 + P361 IF ON SKIN (or hair): Remove/Take off immediately all contaminated clothing. Rinse skin with water/shower.  
+ P353
- P304 + P340 IF INHALED: Remove person to fresh air and keep comfortable for breathing.
- P305 + P351 IF IN EYES: Rinse cautiously with water for several minutes. Remove contact lenses, if present and easy to do. Continue rinsing.  
+ P338
- P310 Immediately call a POISON CENTER or doctor/physician.
- P363 Wash contaminated clothing before reuse.
- P390 Absorb spillage to prevent material damage.

### Storage:

- P405 Store locked up.
- P406 Store in corrosive resistant stainless steel container with a resistant inner liner.

### Disposal:

- P501 Dispose of contents/container to an approved waste disposal plant.

Product safety labeling primarily follows EU GHS guidance.

Contact phone: all countries: +49-621-7590

All human material should be considered potentially infectious. All products derived from human blood are prepared exclusively from the blood of donors tested individually and shown to be free from HBsAg and antibodies to HCV and HIV. The testing methods applied were FDA-approved or cleared in compliance with the European Directive 98/79/EC, Annex II, List A.

However, as no testing method can rule out the potential risk of infection with absolute certainty, the material should be handled with the same level of care as a patient specimen. In the event of exposure, the directives of the responsible health authorities should be followed.<sup>8,9</sup>

Avoid foam formation in all reagents and sample types (specimens, calibrators and controls).

### Reagent handling

The reagents in the kit have been assembled into a ready-for-use unit that cannot be separated.

All information required for correct operation is read in from the respective reagent barcodes.

### Storage and stability

Store at 2-8 °C.

Do not freeze.

Store the Elecsys reagent kit **upright** in order to ensure complete availability of the microparticles during automatic mixing prior to use.

| Stability:              |                                                                                                                                                                                |
|-------------------------|--------------------------------------------------------------------------------------------------------------------------------------------------------------------------------|
| unopened at 2-8 °C      | up to the stated expiration date                                                                                                                                               |
| after opening at 2-8 °C | 84 days (12 weeks)                                                                                                                                                             |
| on the analyzers        | 35 days (5 weeks) onboard or 60 days when stored alternatively in the refrigerator and on the analyzer, with the total time onboard on the analyzer not exceeding 10 x 8 hours |

### Specimen collection and preparation

Only the specimens listed below were tested and found acceptable.

Serum collected using standard sampling tubes or tubes containing separating gel.

Na-heparin, Li-heparin, K<sub>2</sub>-EDTA and K<sub>3</sub>-EDTA plasma. Li-heparin plasma tubes containing separating gel can be used.

Criterion: Slope 0.9-1.1 + intercept within  $\pm 2x$  Limit of Blank (LoB) + coefficient of correlation  $\geq 0.95$ .

Stable for 2 hours at 15-25 °C, 48 hours at 2-8 °C, 56 days at (-15)-(-25) °C. Freeze once only.

Stability of serum obtained with separating tubes: 24 hours at 2-8 °C (note the data provided by the tube manufacturer).

The sample types listed were tested with a selection of sample collection tubes that were commercially available at the time of testing, i.e. not all available tubes of all manufacturers were tested. Sample collection systems from various manufacturers may contain differing materials which could affect the test results in some cases. When processing samples in primary tubes (sample collection systems), follow the instructions of the tube manufacturer.

Centrifuge samples containing precipitates before performing the assay.

Do not use heat-inactivated samples.

Avoid hemolysis.

Do not use samples and controls stabilized with azide.

Vitamin B12 determinations should be performed on serum or plasma samples from fasting patients.

*Note:* Samples with extremely high total protein concentrations (e.g. patients suffering from Waldenström's macroglobulinemia) are not suitable for use in this assay, since they may lead to the formation of protein gel in the assay cup. Processing protein gel may cause a run abort. The critical protein concentration is dependent upon the individual sample composition. The formation of protein gel was seen in samples (spiked with human IgG or human serum albumin) having a total protein concentration  $> 160$  g/L.

Ensure the samples, calibrators and controls are at 20-25 °C prior to measurement.

Due to possible evaporation effects, samples, calibrators and controls on the analyzers should be analyzed/measured within 2 hours.

### Materials provided

See "Reagents – working solutions" section for reagents.

### Materials required (but not provided)

- [REF] 07212780190, Vitamin B12 II CalSet, for 4 x 1 mL
  - [REF] 05618860190, PreciControl Varia, for 2 x 3 mL each of PreciControl Varia 1 and 2
  - [REF] 11732277122, Diluent Universal, 2 x 16 mL sample diluent or [REF] 03183971122, Diluent Universal, 2 x 36 mL sample diluent
  - General laboratory equipment
  - Elecsys 2010, MODULAR ANALYTICS E170 or **cobas e** analyzer
- Accessories for Elecsys 2010 and **cobas e** 411 analyzers:
- [REF] 11662988122, ProCell, 6 x 380 mL system buffer
  - [REF] 11662970122, CleanCell, 6 x 380 mL measuring cell cleaning solution



ms\_07212771190V1.0

# Vitamin B12 II



## Vitamin B12

- [REF] 11930346122, Elecsys SysWash, 1 x 500 mL washwater additive
- [REF] 11933159001, Adapter for SysClean
- [REF] 11706802001, Elecsys 2010 AssayCup, 60 x 60 reaction vessels
- [REF] 11706799001, Elecsys 2010 AssayTip, 30 x 120 pipette tips

Accessories for MODULAR ANALYTICS E170, **cobas e 601** and **cobas e 602** analyzers:

- [REF] 04880340190, ProCell M, 2 x 2 L system buffer
- [REF] 04880293190, CleanCell M, 2 x 2 L measuring cell cleaning solution
- [REF] 03023141001, PC/CC-Cups, 12 cups to prewarm ProCell M and CleanCell M before use
- [REF] 03005712190, ProbeWash M, 12 x 70 mL cleaning solution for run finalization and rinsing during reagent change
- [REF] 03004899190, PreClean M, 5 x 600 mL detection cleaning solution
- [REF] 12102137001, AssayTip/AssayCup Combimagazine M, 48 magazines x 84 reaction vessels or pipette tips, waste bags
- [REF] 03023150001, WasteLiner, waste bags
- [REF] 03027651001, SysClean Adapter M

Accessories for all analyzers:

- [REF] 11298500316, ISE Cleaning Solution/Elecsys SysClean, 5 x 100 mL system cleaning solution

### Assay

For optimum performance of the assay follow the directions given in this document for the analyzer concerned. Refer to the appropriate operator's manual for analyzer-specific assay instructions.

Resuspension of the microparticles takes place automatically prior to use. Read in the test-specific parameters via the reagent barcode. If in exceptional cases the barcode cannot be read, enter the 15-digit sequence of numbers.

MODULAR ANALYTICS E170, **cobas e 601** and **cobas e 602** analyzers: PreClean M solution is necessary.

Bring the cooled reagents to approximately 20 °C and place on the reagent disk (20 °C) of the analyzer. Avoid foam formation. The system automatically regulates the temperature of the reagents and the opening/closing of the bottles.

### Calibration

Traceability: This method has been standardized against the Vitamin B12 assay ([REF] 04745736).

Every Elecsys reagent set has a barcoded label containing specific information for calibration of the particular reagent lot. The predefined master curve is adapted to the analyzer using the relevant CalSet.

**Calibration frequency:** Calibration must be performed once per reagent lot using fresh reagent (i.e. not more than 24 hours since the reagent kit was registered on the analyzer). Renewed calibration is recommended as follows:

- after 1 month (28 days) when using the same reagent lot
- after 7 days (when using the same reagent kit on the analyzer)
- as required: e.g. quality control findings outside the defined limits

### Quality control

For quality control, use PreciControl Varia.

In addition, other suitable control material can be used.

Controls for the various concentration ranges should be run individually at least once every 24 hours when the test is in use, once per reagent kit, and following each calibration.

The control intervals and limits should be adapted to each laboratory's individual requirements. Values obtained should fall within the defined limits. Each laboratory should establish corrective measures to be taken if values fall outside the defined limits.

Follow the applicable government regulations and local guidelines for quality control.

### Calculation

The analyzer automatically calculates the analyte concentration of each sample (either in pmol/L or pg/mL).

Conversion factors: pmol/L x 1.36 = pg/mL  
pg/mL x 0.738 = pmol/L

### Limitations - interference

The assay is unaffected by icterus (bilirubin  $\leq$  1112  $\mu$ mol/L or  $\leq$  65 mg/dL), hemolysis (Hb  $\leq$  0.025 mmol/L or  $\leq$  0.04 g/dL), lipemia (triglycerides  $\leq$  17.1 mmol/L or  $\leq$  1500 mg/dL), biotin ( $\leq$  205 nmol/L or  $\leq$  50 ng/mL), IgG  $\leq$  28 g/L, IgA  $\leq$  16 g/L and IgM  $\leq$  10 g/L.

Criterion: Recovery within  $\pm$  10 % of initial value with samples  $>$  200 pg/mL and  $\leq$   $\pm$  20 pg/mL with samples  $\leq$  200 pg/mL.

Samples should not be taken from patients receiving therapy with high biotin doses (i.e.  $>$  5 mg/day) until at least 8 hours following the last biotin administration.

No interference was observed from rheumatoid factors up to a concentration of 1500 IU/mL.

In vitro tests were performed on 16 commonly used pharmaceuticals. No interference with the assay was found.

In rare cases, interference due to extremely high titers of antibodies to analyte-specific antibodies, streptavidin or ruthenium can occur. These effects are minimized by suitable test design.

Because intrinsic factor is typically used as the binding protein in serum vitamin B12 assays, anti-intrinsic factor antibodies (which are common in pernicious anemia) can lead to elevated vitamin B12 measurement values.<sup>2, 10, 11</sup> The Elecsys Vitamin B12 II assay is designed to avoid interference due to anti-intrinsic factor antibodies.<sup>12</sup>

For diagnostic purposes, the results should always be assessed in conjunction with the patient's medical history, clinical examination and other findings.

Note: The presence of immunoglobulin-vitamin B12 complexes may cause unexpectedly high values of vitamin B12.<sup>13, 14</sup>

### Limits and ranges

#### Measuring range

50.0-2000 pg/mL or 36.9-1476 pmol/L (defined by the Limit of Blank and the maximum of the master curve). Values below the Limit of Blank are reported as  $<$  50.0 pg/mL or  $<$  36.9 pmol/L. Values above the measuring range are reported as  $>$  2000 pg/mL or  $>$  1476 pmol/L.

#### Lower limits of measurement

*Limit of Blank (LoB), Limit of Detection (LoD) and Limit of Quantitation (LoQ)*

Limit of Blank = 50 pg/mL (36.9 pmol/L)

Limit of Detection = 100 pg/mL (73.8 pmol/L)

Limit of Quantitation = 150 pg/mL (111 pmol/L) with a allowable imprecision of  $\leq$  20 %

The Limit of Blank, Limit of Detection and Limit of Quantitation were determined in accordance with the CLSI (Clinical and Laboratory Standards Institute) EP17-A requirements.

The Limit of Blank is the 95<sup>th</sup> percentile value from  $n \geq$  60 measurements of analyte-free samples over several independent series. The Limit of Blank corresponds to the concentration below which analyte-free samples are found with a probability of 95 %.

The Limit of Detection is determined based on the Limit of Blank and the standard deviation of low concentration samples. The Limit of Detection corresponds to the lowest analyte concentration which can be detected (value above the Limit of Blank with a probability of 95 %).

The Limit of Quantitation is defined as the lowest amount of analyte in a sample that can be accurately quantitated with a allowable imprecision of  $\leq$  20 %.

It has been determined using low concentration vitamin B12 samples.

#### Dilution

Samples with vitamin B12 concentrations above the measuring range can be manually diluted 1:2 with Diluent Universal. The concentration of the diluted sample must be  $>$  738 pmol/L or  $>$  1000 pg/mL. After manual dilution, multiply the results by the dilution factor 2.

*Note:* Sample-dependent non-linearity upon dilution is seen with samples having analyte levels beyond the measuring range. As Diluent Universal may contain low levels of endogenous vitamin B12, it is recommended that linearity studies be performed using a known low analyte-containing serum

ms\_07212771190V1.0

# Vitamin B12 II



## Vitamin B12

pool. Samples outside the measuring range can be diluted 1:2 with Diluent Universal; the effect of endogenous vitamin B12 concentration is insignificant at these levels.

### Expected values

Because differences may exist with respect to population and dietary status, it is recommended that normal ranges be determined by each laboratory over a suitable period of time and in a statistically significant number of assays before clinical significance is attached to the results of these tests.

The values shown below were performed on samples from an apparently healthy population, using the Elecsys Vitamin B12 II assay. The calculation is based on 135 sera (68 men, 67 women). The age range was between 20 and 78 years. Pregnant women were excluded. The reference population was selected according to normal homocysteine values.

| N   | Median |        | Range (2.5 <sup>th</sup> -97.5 <sup>th</sup> percentile) |         |
|-----|--------|--------|----------------------------------------------------------|---------|
|     | pg/mL  | pmol/L | pg/mL                                                    | pmol/L  |
| 135 | 425    | 314    | 197-771                                                  | 145-569 |

These values should only be used as guidelines.

Each laboratory should investigate the transferability of the expected values to its own patient population and if necessary determine its own reference ranges.

### Specific performance data

Representative performance data on the analyzers are given below. Results obtained in individual laboratories may differ.

### Precision

Precision was determined using Elecsys reagents, pooled human sera and controls in a protocol (EP5-A2) of the CLSI (Clinical and Laboratory Standards Institute): 2 runs per day in duplication each for 21 days (n = 84). The following results were obtained:

| Elecsys 2010 and cobas e 411 analyzers |       |               |     |                        |     |
|----------------------------------------|-------|---------------|-----|------------------------|-----|
| Sample                                 | Mean  | Repeatability |     | Intermediate precision |     |
|                                        |       | SD            | CV  | SD                     | CV  |
|                                        | pg/mL | pg/mL         | %   | pg/mL                  | %   |
| Human serum 1                          | 176   | 8.86          | 5.0 | 12.7                   | 7.2 |
| Human serum 2                          | 405   | 13.0          | 3.2 | 17.5                   | 4.3 |
| Human serum 3                          | 960   | 19.7          | 2.1 | 31.0                   | 3.2 |
| Human serum 4                          | 1230  | 27.4          | 2.2 | 46.4                   | 3.8 |
| Human serum 5                          | 1940  | 40.9          | 2.1 | 72.6                   | 3.7 |
| PreciControl Varia1                    | 447   | 12.2          | 2.7 | 18.6                   | 4.2 |
| PreciControl Varia2                    | 934   | 20.2          | 2.2 | 38.4                   | 4.1 |

| Elecsys 2010 and cobas e 411 analyzers |        |               |     |                        |     |
|----------------------------------------|--------|---------------|-----|------------------------|-----|
| Sample                                 | Mean   | Repeatability |     | Intermediate precision |     |
|                                        |        | SD            | CV  | SD                     | CV  |
|                                        | pmol/L | pmol/L        | %   | pmol/L                 | %   |
| Human serum 1                          | 130    | 6.54          | 5.0 | 9.37                   | 7.2 |
| Human serum 2                          | 299    | 9.59          | 3.2 | 12.9                   | 4.3 |
| Human serum 3                          | 708    | 14.5          | 2.1 | 22.9                   | 3.2 |
| Human serum 4                          | 908    | 20.2          | 2.2 | 34.2                   | 3.8 |
| Human serum 5                          | 1432   | 30.2          | 2.1 | 53.6                   | 3.7 |
| PreciControl Varia1                    | 330    | 9.00          | 2.7 | 13.7                   | 4.2 |
| PreciControl Varia2                    | 689    | 14.9          | 2.2 | 28.3                   | 4.1 |

| MODULAR ANALYTICS E170, cobas e 601 and cobas e 602 analyzers |       |               |     |                        |     |
|---------------------------------------------------------------|-------|---------------|-----|------------------------|-----|
| Sample                                                        | Mean  | Repeatability |     | Intermediate precision |     |
|                                                               |       | SD            | CV  | SD                     | CV  |
|                                                               | pg/mL | pg/mL         | %   | pg/mL                  | %   |
| Human serum 1                                                 | 176   | 5.84          | 3.3 | 9.14                   | 5.2 |
| Human serum 2                                                 | 407   | 8.24          | 2.0 | 12.7                   | 3.1 |
| Human serum 3                                                 | 1010  | 13.2          | 1.3 | 21.1                   | 2.1 |
| Human serum 4                                                 | 1230  | 19.8          | 1.6 | 28.8                   | 2.3 |
| Human serum 5                                                 | 1890  | 29.8          | 1.6 | 41.5                   | 2.2 |
| PreciControl Varia1                                           | 448   | 7.16          | 1.6 | 15.3                   | 3.4 |
| PreciControl Varia2                                           | 917   | 12.0          | 1.3 | 27.8                   | 3.0 |

| MODULAR ANALYTICS E170, cobas e 601 and cobas e 602 analyzers |        |               |     |                        |     |
|---------------------------------------------------------------|--------|---------------|-----|------------------------|-----|
| Sample                                                        | Mean   | Repeatability |     | Intermediate precision |     |
|                                                               |        | SD            | CV  | SD                     | CV  |
|                                                               | pmol/L | pmol/L        | %   | pmol/L                 | %   |
| Human serum 1                                                 | 130    | 4.31          | 3.3 | 6.75                   | 5.2 |
| Human serum 2                                                 | 300    | 6.08          | 2.0 | 9.37                   | 3.1 |
| Human serum 3                                                 | 745    | 9.74          | 1.3 | 15.6                   | 2.1 |
| Human serum 4                                                 | 908    | 14.6          | 1.6 | 21.3                   | 2.3 |
| Human serum 5                                                 | 1395   | 22.0          | 1.6 | 30.6                   | 2.2 |
| PreciControl Varia1                                           | 331    | 5.28          | 1.6 | 11.3                   | 3.4 |
| PreciControl Varia2                                           | 677    | 8.86          | 1.3 | 20.5                   | 3.0 |

### Method comparison

a) A comparison of the Elecsys Vitamin B12 assay (calibrated with Vitamin B12 CalSet II; x) and the Elecsys Vitamin B12 II assay (calibrated with Vitamin B12 II CalSet; y) using clinical samples gave the following correlations (pg/mL):

Number of samples measured: 100

$y = 0.952x + 15.1$       Linear regression  
 $y = 0.957x + 11.6$   
 $\tau = 0.977$        $r = 0.999$

The sample concentrations were between 69 and 1890 pg/mL (51 and 1395 pmol/L).

b) A comparison of the Elecsys Vitamin B12 II assay (y) and a commercially available method (x) using clinical samples gave the following correlations (pg/mL):

Number of samples measured: 106

$y = 0.923x + 4.90$       Linear regression  
 $y = 0.881x + 27.6$   
 $\tau = 0.952$        $r = 0.993$

The sample concentrations were between 182 and 1797 pg/mL (134 and 1326 pmol/L).

c) A comparison of the Elecsys Vitamin B12 II assay on the cobas e 601 analyzer (y) and the Elecsys Vitamin B12 II assay on the cobas e 411 analyzer (x) using clinical samples gave the following correlations (pg/mL):

Number of samples measured: 117

$y = 1.01x - 2.77$       Linear regression  
 $y = 1.01x + 3.22$   
 $\tau = 0.933$        $r = 0.995$

The sample concentrations were between 56 and 1887 pg/mL (41 and 1393 pmol/L).

ms\_07212771190V1.0

# Vitamin B12 II

## Vitamin B12



### Analytical specificity

The following cross-reactivities were found, tested with vitamin B12 concentrations of 129 pg/mL and 550 pg/mL.

| Cross-reactant       | Maximum concentration tested ng/mL | Cross-reactivity % |
|----------------------|------------------------------------|--------------------|
| Cobinamide dicyanide | 210                                | 0.003              |

### References

- 1 Thomas L. Clinical Laboratory Diagnostics: Use and Assessment of Clinical Laboratory Results; 1st Edition, Frankfurt/Main: TH-Books-Verl.-Ges., 1998:424-431.
- 2 Stabler SP. Vitamin B12 deficiency. N Engl J Med 2013;368:149-160.
- 3 Allen LH. Vitamin B-12. Adv Nutr 2012;3(1):54-55. doi: 10.3945/an.111.001370. Epub 2012 Jan 5.
- 4 Allen LH. How common is vitamin B-12 deficiency? Am J Clin Nutr 2009;89(2):693S-696S. Epub 2008 Dec 30.
- 5 Chatthanawaree W. Biomarkers of cobalamin (vitamin B12) deficiency and its application. J Nutr Health Aging 2011 Mar;15(3):227-313.
- 6 Yetley EA, Pfeiffer CM, Phinney KW, et al., Biomarkers of vitamin B-12 status in NHANES: a roundtable summary. Am J Clin Nutr 2011 Jul;94(1):313S-321S.
- 7 Hvas AM, Nexø E. Diagnosis and treatment of vitamin B12 deficiency - an update. Haematologica 2006;91(11):1506-1512.
- 8 Occupational Safety and Health Standards: bloodborne pathogens. (29 CFR Part 1910.1030). Fed. Register.
- 9 Directive 2000/54/EC of the European Parliament and Council of 18 September 2000 on the protection of workers from risks related to exposure to biological agents at work.
- 10 Yang DT, Cook RJ. Spurious elevations of vitamin B12 with pernicious anemia. N Engl J Med 2012;366:1742-1743.
- 11 Carmel R, Agrawal YP. Failures of cobalamin assays in pernicious anemia. N Engl J Med 2012;367:385-386. [Erratum, N Engl J Med 2012;367:976.]
- 12 Schilling KA, Wiesgigl M. The Elecsys® Vitamin B12 assay is not affected by anti-intrinsic factor antibodies. Clin Chem Lab Med 2013 Jun 29;51(11):e251-e252.
- 13 Jeffery J, Millar H, MacKenzie P, et al. An IgG complexed form of vitamin B12 is a common cause of elevated serum concentrations. Clin Biochem 2010 Jan;43(1-2):82-88. doi: 10.1016/j.clinbiochem.2009.08.022. Epub 2009 Sep 8.
- 14 Bowen RA, Drake SK, Vanjani R, et al. Markedly increased vitamin B12 concentrations attributable to IgG-IgM-vitamin B12 immune complexes. Clin Chem 2006;52(11):2107-2114.
- 15 Bablok W, Passing H, Bender R, et al. A general regression procedure for method transformation. Application of linear regression procedures for method comparison studies in clinical chemistry, Part III. J Clin Chem Clin Biochem 1988 Nov;26(11):783-790.

For further information, please refer to the appropriate operator's manual for the analyzer concerned, the respective application sheets, the product information and the Method Sheets of all necessary components (if available in your country).

A point (period/stop) is always used in this Method Sheet as the decimal separator to mark the border between the integral and the fractional parts of a decimal numeral. Separators for thousands are not used.

### Symbols

Roche Diagnostics uses the following symbols and signs in addition to those listed in the ISO 15223-1 standard.

|                                                                                     |                                                     |
|-------------------------------------------------------------------------------------|-----------------------------------------------------|
|  | Contents of kit                                     |
|  | Analyzers/Instruments on which reagents can be used |
|  | Reagent                                             |
|  | Calibrator                                          |

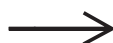

Volume after reconstitution or mixing



Global Trade Item Number

COBAS, COBAS E, ELECSYS and PRECICONTROL are trademarks of Roche. INTRALIPID is a trademark of Fresenius Kabi AB.

All other product names and trademarks are the property of their respective owners.

Additions, deletions or changes are indicated by a change bar in the margin.

© 2015, Roche Diagnostics

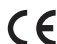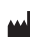

Roche Diagnostics GmbH, Sandhofer Strasse 116, D-68305 Mannheim  
www.roche.com

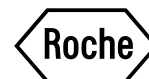

0107227841190c501V1.0

# STFR2



## Tina-quant Soluble Transferrin Receptor II

### Order information

| REF         | CONTENT                                               | Analyzer(s) on which <b>cobas c</b> pack(s) can be used |
|-------------|-------------------------------------------------------|---------------------------------------------------------|
| 07227841190 | Tina-quant Soluble Transferrin Receptor II(100 tests) | System-ID 07 7473 1 <b>cobas c 311, cobas c 501/502</b> |
| 08753776190 | Calibrator sTfR II (3 x 1 mL)                         | Codes 697                                               |
| 08278202190 | ControlSet sTfR II                                    |                                                         |
|             | Level I (3 x 1 mL)                                    | Level I Code 153                                        |
|             | Level II (3 x 1 mL)                                   | Level II Code 154                                       |
| 04489357190 | Diluent NaCl 9 % (50 mL)                              | System-ID 07 6869 3                                     |

### English

#### System information

For **cobas c 311/501** analyzers:

**STFR2:** ACN 439

For **cobas c 502** analyzer:

**STFR2:** ACN 8439

#### Intended use

In vitro test for the quantitative determination of soluble transferrin receptor (sTfR) in human serum and plasma on **cobas c** systems.

#### Summary<sup>1,2,3,4,5,6,7</sup>

The transferrin receptor is an integral membrane glycoprotein having a molecular weight of 190 kilodalton (kDa). It consists of two identical subunits linked by disulfide bridges. Each of the monomers has an 85 kDa C-terminal component which can bind an iron-laden transferrin molecule. Proteolysis leads to the soluble form of the transferrin receptor (sTfR). In plasma, the soluble transferrin receptor is present in the form of a complex with transferrin having a molecular weight of approximately 320 kD. The serum concentration of sTfR is directly proportional to the concentration of the receptor on the membrane.

The uptake of iron by the body's cells is controlled by expression of the transferrin receptor (TfR). If the intracellular iron stores are exhausted - corresponding to a ferritin concentration of less than 12 µg/L - then more TfR is expressed. The affinity of the transferrin receptor to transferrin depends on the latter's loading state. As 80-95 % of the transferrin receptor molecules are localized on erythropoietic cells, the TfR concentration (and hence also the sTfR concentration) reflects the iron requirement of these cells. When iron deficiency exists, the sTfR concentration in serum rises even before the hemoglobin concentration is significantly depressed. The sTfR concentration can therefore describe the functional iron status while ferritin reflects the iron storage status. A precise assessment of the iron status can be obtained by determining the sTfR index (= sTfR concentration/log ferritin concentration).

As - in contrast to ferritin - the concentration of sTfR is not affected by acute-phase reactions, acute liver function disorders or malignant tumors, it is possible to differentiate between anemia of chronic disease (ACD) and iron deficiency anemia (IDA). Elevated sTfR values are also found in polycythemia, hemolytic anemia, thalassemia, hereditary spherocytosis, sickle cell anemia, megaloblastic anemia, myelodysplastic syndrome and vitamin B<sub>12</sub> deficiency. Elevated sTfR concentrations occur during pregnancy when there is a deficiency of functional iron.

| Parameter  | Change                     | IDA | ACD | IDA + ACD |
|------------|----------------------------|-----|-----|-----------|
| Ferritin   | iron stores                | ↓   | ↑   | — or ↑    |
| TIBC/TRSF  | iron status                | ↑   | ↓   | ↑ or —    |
| Serum iron | iron status                | ↓   | ↓   | ↓         |
| sTfR       | functional iron deficiency | ↑   | —   | ↑         |

↓ decreased, ↑ increased, — unchanged

#### Test principle<sup>8</sup>

Particle enhanced immunoturbidimetric assay.

Human soluble transferrin receptor agglutinates with latex particles coated with anti-soluble transferrin receptor antibodies. The precipitate is determined photometrically.

#### Reagents - working solutions

**R1** TRIS buffer: with bovine serum albumin; preservatives

**R2** Latex particles coated with monoclonal anti-human sTfR antibodies (mouse) in glycine buffer; preservative

R1 is in position B and R2 is in position C.

#### Precautions and warnings

For in vitro diagnostic use.

Exercise the normal precautions required for handling all laboratory reagents.

Disposal of all waste material should be in accordance with local guidelines. Safety data sheet available for professional user on request.

This kit contains components classified as follows in accordance with the Regulation (EC) No. 1272/2008:

Contains 2-methyl-2H-isothiazol-3-one hydrochloride

EUH 208 May produce an allergic reaction.

Product safety labeling follows EU GHS guidance.

#### Reagent handling

Ready for use

Carefully invert reagent container several times prior to use to ensure that the reagent components are mixed.

#### Storage and stability

##### STFR2

Shelf life at 2-8 °C: See expiration date on **cobas c** pack label.

On-board in use and refrigerated on the analyzer: 26 weeks

##### Diluent NaCl 9 %

Shelf life at 2-8 °C: See expiration date on **cobas c** pack label.

On-board in use and refrigerated on the analyzer: 12 weeks

#### Specimen collection and preparation

For specimen collection and preparation only use suitable tubes or collection containers.

Only the specimens listed below were tested and found acceptable. Serum.

Plasma: Heparin (Li-, Na-, NH<sub>4</sub><sup>+</sup>-) plasma

The sample types listed were tested with a selection of sample collection tubes that were commercially available at the time of testing, i.e. not all available tubes of all manufacturers were tested. Sample collection systems from various manufacturers may contain differing materials which could affect the test results in some cases. When processing samples in primary tubes (sample collection systems), follow the instructions of the tube manufacturer.

Centrifuge samples containing precipitates before performing the assay.

See the limitations and interferences section for details about possible sample interferences.

Stability: 6 days at 15-25 °C  
15 days at 2-8 °C  
13 weeks at -20 °C (±5 °C) (freeze only once)

0107227841190c501V1.0

# STFR2

## Tina-quant Soluble Transferrin Receptor II

**cobas**<sup>®</sup>

Sample stability claims were established by experimental data by the manufacturer or based on reference literature and only for the temperatures/time frames as stated in the method sheet. It is the responsibility of the individual laboratory to use all available references and/or its own studies to determine specific stability criteria for its laboratory.

### Materials provided

See "Reagents – working solutions" section for reagents.

### Materials required (but not provided)

- See "Order information" section
- General laboratory equipment

### Assay

For optimum performance of the assay follow the directions given in this document for the analyzer concerned. Refer to the appropriate operator's manual for analyzer-specific assay instructions.

The performance of applications not validated by Roche is not warranted and must be defined by the user.

### Application for serum and plasma

#### cobas c 311 test definition

|                            |                            |                 |                |
|----------------------------|----------------------------|-----------------|----------------|
| Assay type                 | 2-Point End                |                 |                |
| Reaction time/Assay points | 10 / 8-21                  |                 |                |
| Wavelength (sub/main)      | 800/570 nm                 |                 |                |
| Reaction direction         | Increase                   |                 |                |
| Unit                       | mg/L (mg/dL, nmol/L)       |                 |                |
| Reagent pipetting          | Diluent (H <sub>2</sub> O) |                 |                |
| R1                         | 100 µL                     | -               |                |
| R2                         | 40 µL                      | -               |                |
| Sample volumes             | Sample                     | Sample dilution |                |
|                            |                            | Sample          | Diluent (NaCl) |
| Normal                     | 2 µL                       | -               | -              |
| Decreased                  | 2 µL                       | 25 µL           | 75 µL          |
| Increased                  | 2 µL                       |                 |                |

#### cobas c 501 test definition

|                            |                            |                 |                |
|----------------------------|----------------------------|-----------------|----------------|
| Assay type                 | 2-Point End                |                 |                |
| Reaction time/Assay points | 10 / 13-30                 |                 |                |
| Wavelength (sub/main)      | 800/570 nm                 |                 |                |
| Reaction direction         | Increase                   |                 |                |
| Unit                       | mg/L (mg/dL, nmol/L)       |                 |                |
| Reagent pipetting          | Diluent (H <sub>2</sub> O) |                 |                |
| R1                         | 100 µL                     | -               |                |
| R2                         | 40 µL                      | -               |                |
| Sample volumes             | Sample                     | Sample dilution |                |
|                            |                            | Sample          | Diluent (NaCl) |
| Normal                     | 2 µL                       | -               | -              |
| Decreased                  | 2 µL                       | 25 µL           | 75 µL          |
| Increased                  | 2 µL                       |                 |                |

#### cobas c 502 test definition

|                            |                      |  |  |
|----------------------------|----------------------|--|--|
| Assay type                 | 2-Point End          |  |  |
| Reaction time/Assay points | 10 / 13-30           |  |  |
| Wavelength (sub/main)      | 800/570 nm           |  |  |
| Reaction direction         | Increase             |  |  |
| Unit                       | mg/L (mg/dL, nmol/L) |  |  |

|                   |                            |                 |                |
|-------------------|----------------------------|-----------------|----------------|
| Reagent pipetting | Diluent (H <sub>2</sub> O) |                 |                |
| R1                | 100 µL                     | -               |                |
| R2                | 40 µL                      | -               |                |
| Sample volumes    | Sample                     | Sample dilution |                |
|                   |                            | Sample          | Diluent (NaCl) |
| Normal            | 2 µL                       | -               | -              |
| Decreased         | 2 µL                       | 25 µL           | 75 µL          |
| Increased         | 2 µL                       |                 |                |

### Calibration

|                       |                                                                                                                                                                                                                                                             |
|-----------------------|-------------------------------------------------------------------------------------------------------------------------------------------------------------------------------------------------------------------------------------------------------------|
| Calibrators           | S1: H <sub>2</sub> O<br>S2-S6: Calibrator sTfR II                                                                                                                                                                                                           |
| Calibration mode      | Non-linear                                                                                                                                                                                                                                                  |
| Calibration frequency | Full calibration <ul style="list-style-type: none"> <li>after reagent lot change</li> <li>after 12 weeks on-board the analyzer</li> <li>after 6 months when using a single reagent lot</li> <li>as required following quality control procedures</li> </ul> |

Calibration interval may be extended based on acceptable verification of calibration by the laboratory.

Traceability: This method has been standardized against an in-house reference preparation.

### Quality control

For quality control, use control materials as listed in the "Order information" section.

In addition, other suitable control material can be used.

The control intervals and limits should be adapted to each laboratory's individual requirements. Values obtained should fall within the defined limits. Each laboratory should establish corrective measures to be taken if values fall outside the defined limits.

Follow the applicable government regulations and local guidelines for quality control.

### Calculation

cobas c systems automatically calculate the analyte concentration of each sample in the unit mg/L (mg/dL, nmol/L)

|                     |                                      |
|---------------------|--------------------------------------|
| Conversion factors: | mg/L x 11.8 = nmol/L <sup>9,a)</sup> |
|                     | mg/L x 0.1 = mg/dL                   |

a) Based on a molecular mass of 85 kDa for circulating transferrin receptor.

### Limitations – interference

Criterion: Recovery within  $\pm 0.2$  mg/L (2.36 nmol/L) of initial values of samples  $\leq 2$  mg/L (23.6 nmol/L) and within  $\pm 10\%$  for samples  $> 2$  mg/L.

Icterus:<sup>10</sup> No significant interference up to an I index of 60 for conjugated and unconjugated bilirubin (approximate conjugated and unconjugated bilirubin concentration: 1026 µmol/L or 60 mg/dL).

Hemolysis:<sup>10</sup> No significant interference up to an H index of 1000 (approximate hemoglobin concentration: 622 µmol/L or 1000 mg/dL).

Lipemia (Intralipid):<sup>10</sup> No significant interference up to an L index of 2000. There is poor correlation between the L index (corresponds to turbidity) and triglycerides concentration.

Rheumatoid factors: No significant interference from rheumatoid factors up to a concentration of 1200 IU/mL.

High dose hook-effect: No false result occurs up to an sTfR concentration of 80 mg/L (944 nmol/L).

The antibodies are specific for sTfR. There is no cross-reactivity with diferrotransferrin, apotransferrin or ferritin under the assay conditions.

Drugs: No interference was found at therapeutic concentrations using common drug panels.<sup>11,12</sup>

0107227841190c501V1.0

# STFR2

## Tina-quant Soluble Transferrin Receptor II



In very rare cases, gammopathy, in particular type IgM (Waldenström's macroglobulinemia), may cause unreliable results.<sup>13</sup>

In very rare cases, patient samples may contain particle agglutinating proteins (e.g. heterophilic antibodies or antibodies due to abnormal immunoglobulin synthesis, such as gammopathies like MGUS\* or Waldenström's macroglobulinemia) which may lead to incorrect low or high results with this assay. Correct results cannot be obtained by sample dilution and these samples should be analyzed by an alternative method.

\*Monoclonal Gammopathy of unknown significance

For diagnostic purposes, the results should always be assessed in conjunction with the patient's medical history, clinical examination and other findings.

### ACTION REQUIRED

**Special Wash Programming:** The use of special wash steps is mandatory when certain test combinations are run together on **cobas c** systems. The latest version of the carry-over evasion list can be found with the NaOH-SMS-SmpCln1+2-SCCS Method Sheets. For further instructions refer to the operator's manual. **cobas c** 502 analyzer: All special wash programming necessary for avoiding carry-over is available via the **cobas** link, manual input is required in certain cases.

**Where required, special wash/carry-over evasion programming must be implemented prior to reporting results with this test.**

### Limits and ranges

#### Measuring range

0.50-20.0 mg/L (5.9-236 nmol/L)

Determine samples having higher concentrations via the rerun function. Dilution of samples via the rerun function is a 1:4 dilution. Results from samples diluted using the rerun function are automatically multiplied by a factor of 4.

#### Lower limits of measurement

*Limit of Blank, Limit of Detection and Limit of Quantitation*

Limit of Blank = 0.25 mg/L (2.95 nmol/L)

Limit of Detection = 0.40 mg/L (4.72 nmol/L)

Limit of Quantitation = 0.50 mg/L (5.90 nmol/L)

The Limit of Blank and Limit of Detection were determined in accordance with the CLSI (Clinical and Laboratory Standards Institute) EP17-A2 requirements.

The Limit of Blank is the 95<sup>th</sup> percentile value from n ≥ 60 measurements of analyte-free samples over several independent series. The Limit of Blank corresponds to the concentration below which analyte-free samples are found with a probability of 95 %.

The Limit of Detection is determined based on the Limit of Blank and the standard deviation of low concentration samples.

The Limit of Detection corresponds to the lowest analyte concentration which can be detected (value above the Limit of Blank with a probability of 95 %).

The Limit of Quantitation is the lowest analyte concentration that can be reproducibly measured with a total error of 20 %. It has been determined using low concentration sTfR samples.

#### Expected values

The values shown below were performed on samples from an apparently healthy population, using the Tina-quant Soluble Transferrin Receptor II assay (STFR2). The calculation is based on 165 sera (101 men, 64 women). The age range was between 22 and 83 years. The analysis of the data with the 2.5 % and the 97.5 % percentile gave a soluble transferrin receptor (sTfR) range from 1.71 mg/L (20.2 nmol/L) to 4.13 mg/L (48.7 nmol/L).

Each laboratory should investigate the transferability of the expected values to its own patient population and if necessary determine its own reference ranges.

#### Specific performance data

Representative performance data on the analyzers are given below. Results obtained in individual laboratories may differ.

#### Precision

Precision was determined using human samples and controls in accordance with the CLSI (Clinical and Laboratory Standards Institute)

EP5-A3 requirements with repeatability (n = 84) and intermediate precision (2 aliquots per run, 2 runs per day, 21 days)

The following results were obtained:

| Repeatability           | Mean | SD     | CV  |
|-------------------------|------|--------|-----|
|                         | mg/L | mg/L   | %   |
| Control Set sTfR II L 1 | 2.56 | 0.0389 | 1.5 |
| Control Set sTfR II L 2 | 6.91 | 0.0626 | 0.9 |
| Human serum 1           | 1.21 | 0.0375 | 3.1 |
| Human serum 2           | 2.00 | 0.0438 | 2.2 |
| Human serum 3           | 5.27 | 0.0526 | 1.0 |
| Human serum 4           | 9.23 | 0.108  | 1.2 |
| Human serum 5           | 17.7 | 0.157  | 0.9 |
| Intermediate precision  | Mean | SD     | CV  |
|                         | mg/L | mg/L   | %   |
| Control Set sTfR II L 1 | 2.56 | 0.0444 | 1.7 |
| Control Set sTfR II L 2 | 6.91 | 0.0732 | 1.1 |
| Human serum 1           | 1.21 | 0.0388 | 3.2 |
| Human serum 2           | 2.00 | 0.0475 | 2.4 |
| Human serum 3           | 5.27 | 0.0675 | 1.3 |
| Human serum 4           | 9.31 | 0.118  | 1.3 |
| Human serum 5           | 17.7 | 0.192  | 1.1 |

#### Method comparison

sTfR values for human serum and plasma samples obtained on a **cobas c** 501 analyzer (y) were compared with those determined using the Soluble Transferrin Receptor assay (STFR) on a **cobas c** 501 analyzer(x).

Sample size (n) = 87

|                                    |                                    |
|------------------------------------|------------------------------------|
| Passing/Bablok <sup>14</sup>       | Linear regression                  |
| $y = 0.987x + 0.0347 \text{ mg/L}$ | $y = 0.989x + 0.0264 \text{ mg/L}$ |
| $\tau = 0.939$                     | $r = 0.996$                        |

The sample concentrations were between 0.660 and 19.1 mg/L.

#### References

- Wick M, Pinggera W, Lehmann P, eds. Iron Metabolism, Diagnosis and Therapy of Anemias. 4th ed. Vienna/New York: Springer Verlag 1999.
- Ferguson BJ, Skikne BS, Simpson KM, et al. Serum transferrin receptor distinguishes the anemia of chronic diseases from iron deficiency anemia. J Lab Clin Med 1992;19:385-390.
- Baynes RD, Skikne BS, Cook JD. Circulating transferrin receptors and assessment of iron status. J Nutr Biochem 1994;5:322-330.
- Kuiper-Kramer EPA, Huisman CMS, van Raan J, et al. Analytical and clinical implications of soluble transferrin receptors. Eur J Clin Chem Clin Biochem 1996;34:645-649.
- Baynes RD. Assessment of iron status. Clin Biochem 1996;29:209-215.
- Punnonen K, Irjala K, Rajamäki A. Serum transferrin receptor and its ratio to serum ferritin in the diagnosis of iron deficiency. Blood 1997;89:1052-1057.
- Suominen P, Punnonen K, Rajamäki A, et al. Serum transferrin receptor and transferrin receptor-ferritin index identify healthy subjects with subclinical iron deficits. Blood 1998;92:2934-2939.
- Haeckel R, ed. Evaluation methods in laboratory medicine. VCH Verlagsgesellschaft, Weinheim 1993.
- Cook JD, Skikne BS, Baynes RD. Serum transferrin receptor. Annu Rev Med 1993;44:63-74.
- Glick MR, Ryder KW, Jackson SA. Graphical Comparisons of Interferences in Clinical Chemistry Instrumentation. Clin Chem 1986;32:470-475.

0107227841190c501V1.0

# STFR2

## Tina-quant Soluble Transferrin Receptor II

- 11 Breuer J. Report on the Symposium "Drug effects in Clinical Chemistry Methods". Eur J Clin Chem Clin Biochem 1996;34:385-386.
- 12 Sonntag O, Scholer A. Drug interference in clinical chemistry: recommendation of drugs and their concentrations to be used in drug interference studies. Ann Clin Biochem 2001;38:376-385.
- 13 Bakker AJ, Mücke M. Gammopathy interference in clinical chemistry assays: mechanisms, detection and prevention. Clin Chem Lab Med 2007;45(9):1240-1243.
- 14 Bablok W, Passing H, Bender R, et al. A general regression procedure for method transformation. Application of linear regression procedures for method comparison studies in clinical chemistry, Part III. J Clin Chem Clin Biochem 1988 Nov;26(11):783-790.

A point (period/stop) is always used in this Method Sheet as the decimal separator to mark the border between the integral and the fractional parts of a decimal numeral. Separators for thousands are not used.

### Symbols

Roche Diagnostics uses the following symbols and signs in addition to those listed in the ISO 15223-1 standard (for USA: see dialog.roche.com for definition of symbols used):

|                                                                                   |                           |
|-----------------------------------------------------------------------------------|---------------------------|
|  | Contents of kit           |
|  | Volume for reconstitution |
|  | Global Trade Item Number  |

COBAS, COBAS C and TINA-QUANT are trademarks of Roche.

All other product names and trademarks are the property of their respective owners.

Additions, deletions or changes are indicated by a change bar in the margin.

© 2020, Roche Diagnostics

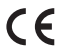

Roche Diagnostics GmbH, Sandhofer Strasse 116, D-68305 Mannheim  
www.roche.com

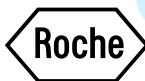

ms\_03737551190V14.0

# Ferritin



## Ferritin

|              |     |                                                                                     |
|--------------|-----|-------------------------------------------------------------------------------------|
| <b>REF</b>   |     | <b>SYSTEM</b>                                                                       |
| 03737551 190 | 100 | Elecsys 2010<br>MODULAR ANALYTICS E170<br>cobas e 411<br>cobas e 601<br>cobas e 602 |

### English

#### Intended use

Immunoassay for the in vitro quantitative determination of ferritin in human serum and plasma.

The electrochemiluminescence immunoassay "ECLIA" is intended for use on Elecsys and **cobas e** immunoassay analyzers.

#### Summary

Ferritin is a macromolecule with a molecular weight of at least 440 kDa (depending on the iron content) and consists of a protein shell (apoferritin) of 24 subunits and an iron core containing an average of approx. 2500 Fe<sup>3+</sup> ions (in liver and spleen ferritin).<sup>1</sup>

Ferritin tends to form oligomers, and when it is present in excess in the cells of the storage organs there is a tendency for condensation to semicrystalline hemosiderin to occur in the lysosomes.

At least 20 isoferritins can be distinguished with the aid of isoelectric focusing.<sup>2</sup> This microheterogeneity is due to differences in the contents of the acidic H and weakly basic L subunits. The basic isoferritins are responsible for the long-term iron storage function, and are found mainly in the liver, spleen, and bone marrow.<sup>1,3</sup>

Acidic isoferritins are found mainly in the myocardium, placenta, and tumor tissue. They have a lower iron content and presumably function as intermediaries for the transfer of iron in various syntheses.<sup>4,5,6</sup>

The determination of ferritin is a suitable method for ascertaining the iron metabolism situation. Determination of ferritin at the beginning of therapy provides a representative measure of the body's iron reserves. A storage deficiency in the reticulo-endothelial system (RES) can be detected at a very early stage.<sup>7</sup>

Clinically, a threshold value of 20 µg/L (ng/mL) has proved useful in the detection of prelatent iron deficiency. This value provides a reliable indication of exhaustion of the iron reserves that can be mobilized for hemoglobin synthesis. Latent iron deficiency is defined as a fall below the 12 µg/L (ng/mL) ferritin threshold. These two values necessitate no further laboratory elucidation, even when the blood picture is still morphologically normal. If the depressed ferritin level is accompanied by hypochromic, microcytal anemia, then manifest iron deficiency is present.<sup>1</sup>

When the ferritin level is elevated and the possibility of a distribution disorder can be ruled out, this is a manifestation of iron overloading in the body. 400 µg/L (ng/mL) ferritin is used as the threshold value. Elevated ferritin values are also encountered with the following tumors: acute leukemia, Hodgkin's disease and carcinoma of the lung, colon, liver and prostate. The determination of ferritin has proved to be of value in liver metastasis. Studies indicate that 76 % of all patients with liver metastasis have ferritin values above 400 µg/L (ng/mL). Reasons for the elevated values could be cell necrosis, blocked erythropoiesis or increased synthesis in tumor tissue.

Two monoclonal mouse antibodies - M-4.184 and M-3.170 - are used to form the sandwich complex in the assay.

#### Test principle

Sandwich principle. Total duration of assay: 18 minutes.

- 1st incubation: 10 µL of sample, a biotinylated monoclonal ferritin-specific antibody, and a monoclonal ferritin-specific antibody labeled with a ruthenium complex<sup>a)</sup> form a sandwich complex.
- 2nd incubation: After addition of streptavidin-coated microparticles, the complex becomes bound to the solid phase via interaction of biotin and streptavidin.

- The reaction mixture is aspirated into the measuring cell where the microparticles are magnetically captured onto the surface of the electrode. Unbound substances are then removed with ProCell/ProCell M. Application of a voltage to the electrode then induces chemiluminescent emission which is measured by a photomultiplier.
- Results are determined via a calibration curve which is instrument-specifically generated by 2-point calibration and a master curve provided via the reagent barcode.

a) Tris(2,2'-bipyridyl)ruthenium(II)-complex (Ru(bpy)<sub>3</sub><sup>2+</sup>)

#### Reagents - working solutions

The reagent rackpack is labeled as FERR.

- M Streptavidin-coated microparticles (transparent cap), 1 bottle, 6.5 mL: Streptavidin-coated microparticles 0.72 mg/mL; preservative.
- R1 Anti-Ferritin-Ab~biotin (gray cap), 1 bottle, 10 mL: Biotinylated monoclonal anti-ferritin antibody (mouse) 3.0 mg/L; phosphate buffer 100 mmol/L, pH 7.2; preservative.
- R2 Anti-ferritin-Ab~Ru(bpy)<sub>3</sub><sup>2+</sup> (black cap), 1 bottle, 10 mL: Monoclonal anti-ferritin antibody (mouse) labeled with ruthenium complex 6.0 mg/L; phosphate buffer 100 mmol/L, pH 7.2; preservative.

#### Precautions and warnings

For in vitro diagnostic use.  
 Exercise the normal precautions required for handling all laboratory reagents.  
 Disposal of all waste material should be in accordance with local guidelines. Safety data sheet available for professional user on request.  
 Avoid foam formation in all reagents and sample types (specimens, calibrators and controls).

#### Reagent handling

The reagents in the kit have been assembled into a ready-for-use unit that cannot be separated.

All information required for correct operation is read in from the respective reagent barcodes.

#### Storage and stability

Store at 2-8 °C.  
 Do not freeze.  
 Store the Elecsys reagent kit **upright** in order to ensure complete availability of the microparticles during automatic mixing prior to use.

|                         |                                  |
|-------------------------|----------------------------------|
| Stability:              |                                  |
| unopened at 2-8 °C      | up to the stated expiration date |
| after opening at 2-8 °C | 12 weeks                         |
| on the analyzers        | 6 weeks                          |

#### Specimen collection and preparation

Only the specimens listed below were tested and found acceptable.  
 Serum collected using standard sampling tubes.  
 Li<sup>-</sup>, Na-heparin, K<sub>3</sub>-EDTA and sodium citrate plasma.  
 When sodium citrate is used, the results must be corrected by + 10 %.  
 Criterion: Recovery within 90-110 % of serum value or slope  
 0.9-1.1 + intercept within < ± 2x analytical sensitivity (LDL) + coefficient of correlation > 0.95.  
 Stable for 7 days at 2-8 °C, 12 months at -20 °C.<sup>8</sup>



ms\_03737551190V14.0

# Ferritin

## Ferritin



The sample types listed were tested with a selection of sample collection tubes that were commercially available at the time of testing, i.e. not all available tubes of all manufacturers were tested. Sample collection systems from various manufacturers may contain differing materials which could affect the test results in some cases. When processing samples in primary tubes (sample collection systems), follow the instructions of the tube manufacturer.

Centrifuge samples containing precipitates before performing the assay.

Do not use heat-inactivated samples.

Do not use samples and controls stabilized with azide.

Ensure the samples, calibrators and controls are at 20-25 °C prior to measurement.

Due to possible evaporation effects, samples, calibrators and controls on the analyzers should be analyzed/measured within 2 hours.

### Materials provided

See "Reagents – working solutions" section for reagents.

### Materials required (but not provided)

- [REF] 03737586190, Ferritin CalSet, 4 x 1 mL
- [REF] 11776452122, PreciControl Tumor Marker, for 2 x 3 mL each of PreciControl Tumor Marker 1 and 2 or [REF] 05618860190, PreciControl Varia, for 2 x 3 mL each of PreciControl Varia 1 and 2
- [REF] 11732277122, Diluent Universal, 2 x 16 mL sample diluent or [REF] 03183971122, Diluent Universal, 2 x 36 mL sample diluent
- General laboratory equipment
- Elecsys 2010, MODULAR ANALYTICS E170 or **cobas e** analyzer

Accessories for Elecsys 2010 and **cobas e** 411 analyzers:

- [REF] 11662988122, ProCell, 6 x 380 mL system buffer
- [REF] 11662970122, CleanCell, 6 x 380 mL measuring cell cleaning solution
- [REF] 11930346122, Elecsys SysWash, 1 x 500 mL washwater additive
- [REF] 11933159001, Adapter for SysClean
- [REF] 11706802001, Elecsys 2010 AssayCup, 60 x 60 reaction vessels
- [REF] 11706799001, Elecsys 2010 AssayTip, 30 x 120 pipette tips

Accessories for MODULAR ANALYTICS E170, **cobas e** 601 and **cobas e** 602 analyzers:

- [REF] 04880340190, ProCell M, 2 x 2 L system buffer
- [REF] 04880293190, CleanCell M, 2 x 2 L measuring cell cleaning solution
- [REF] 03023141001, PC/CC-Cups, 12 cups to prewarm ProCell M and CleanCell M before use
- [REF] 03005712190, ProbeWash M, 12 x 70 mL cleaning solution for run finalization and rinsing during reagent change
- [REF] 12102137001, AssayTip/AssayCup Combimagazine M, 48 magazines x 84 reaction vessels or pipette tips, waste bags
- [REF] 03023150001, WasteLiner, waste bags
- [REF] 03027651001, SysClean Adapter M

Accessories for all analyzers:

- [REF] 11298500316, Elecsys SysClean, 5 x 100 mL system cleaning solution

### Assay

For optimum performance of the assay follow the directions given in this document for the analyzer concerned. Refer to the appropriate operator's manual for analyzer-specific assay instructions.

Resuspension of the microparticles takes place automatically prior to use. Read in the test-specific parameters via the reagent barcode. If in exceptional cases the barcode cannot be read, enter the 15-digit sequence of numbers.

Bring the cooled reagents to approx. 20 °C and place on the reagent disk (20 °C) of the analyzer. Avoid foam formation. The system automatically regulates the temperature of the reagents and the opening/closing of the bottles.

### Calibration

Traceability: The Ferritin assay ([REF] 03737551) has been standardized against the Ferritin assay ([REF] 11820982). The Ferritin assay ([REF] 11820982) has been standardized against the Enzymun-Test Ferritin method. This in turn has been standardized against the 1st International Standard (IS) NIBSC (National Institute for Biological Standards and Control) "Reagent for Ferritin (human liver)" 80/602.

Recovery studies, including a published study,<sup>9</sup> to assess traceability of the Elecsys Ferritin assay to more recent international standards (2nd IS 80/578 and 3rd IS 94/572) have been conducted, with results showing very good agreement.

Every Elecsys reagent set has a barcoded label containing specific information for calibration of the particular reagent lot. The predefined master curve is adapted to the analyzer using the relevant CalSet.

**Calibration frequency:** Calibration must be performed once per reagent lot using fresh reagent (i.e. not more than 24 hours since the reagent kit was registered on the analyzer). Renewed calibration is recommended as follows:

- after 1 month (28 days) when using the same reagent lot
- after 7 days (when using the same reagent kit on the analyzer)
- as required: e.g. quality control findings outside the defined limits

### Quality control

For quality control, use PreciControl Tumor Marker or PreciControl Varia.

In addition, other suitable control material can be used.

Controls for the various concentration ranges should be run individually at least once every 24 hours when the test is in use, once per reagent kit, and following each calibration.

The control intervals and limits should be adapted to each laboratory's individual requirements. Values obtained should fall within the defined limits. Each laboratory should establish corrective measures to be taken if values fall outside the defined limits.

Follow the applicable government regulations and local guidelines for quality control.

### Calculation

The analyzer automatically calculates the analyte concentration of each sample (either in µg/L or ng/mL).

### Limitations - interference

The assay is unaffected by icterus (bilirubin < 1112 µmol/L or < 65 mg/dL), hemolysis (Hb < 0.31 mmol/L or < 0.5 g/dL), lipemia (Intralipid < 3300 mg/dL) and biotin (< 205 nmol/L or < 50 ng/mL).

Criterion: Recovery within ± 10 % of initial value.

Samples should not be taken from patients receiving therapy with high biotin doses (i.e. > 5 mg/day) until at least 8 hours following the last biotin administration.

No interference was observed from rheumatoid factors up to a concentration of 2500 IU/mL.

There is no high-dose hook effect at ferritin concentrations up to 100000 µg/L (ng/mL).

In vitro tests were performed on 19 commonly used pharmaceuticals. No interference with the assay was found.

Iron<sup>2+</sup>- and iron<sup>3+</sup>-ions at therapeutic concentrations do not interfere with the Elecsys Ferritin assay.

In rare cases, interference due to extremely high titers of antibodies to analyte-specific antibodies, streptavidin or ruthenium can occur. These effects are minimized by suitable test design.

For diagnostic purposes, the results should always be assessed in conjunction with the patient's medical history, clinical examination and other findings.

### Limits and ranges

#### Measuring range

0.500-2000 µg/L (ng/mL) (defined by the lower detection limit and the maximum of the master curve). Values below the lower detection limit are reported as < 0.500 µg/L (ng/mL). Values above the measuring range are reported as > 2000 µg/L (ng/mL) (or up to 100000 µg/L (ng/mL) for 50-fold diluted samples).

ms\_03737551190V14.0

# Ferritin

## Ferritin



### Lower limits of measurement

#### Lower detection limit of the test

Lower detection limit: 0.50 µg/L (ng/mL)

The lower detection limit represents the lowest measurable analyte level that can be distinguished from zero. It is calculated as the value lying two standard deviations above that of the lowest standard (master calibrator, standard 1 + 2 SD, repeatability study, n = 21).

### Dilution

Samples with ferritin concentrations above the measuring range can be diluted with Diluent Universal. The recommended dilution is 1:50 (either automatically by the MODULAR ANALYTICS E170, Elecsys 2010 or **cobas e** analyzers or manually). The concentration of the diluted sample must be > 40 µg/L (ng/mL).

After manual dilution, multiply the result by the dilution factor.

After dilution by the analyzers, the MODULAR ANALYTICS E170, Elecsys 2010 and **cobas e** software automatically takes the dilution into account when calculating the sample concentration.

### Expected values

Results of a study with the Enzymun-Test Ferritin method on samples from 224 healthy test subjects (104 women - mainly premenopausal - and 120 men) are given below. The values correspond to the 5<sup>th</sup> and 95<sup>th</sup> percentiles.<sup>10</sup>

Men, 20-60 years: 30-400 µg/L (ng/mL)

Women, 17-60 years: 13-150 µg/L (ng/mL)

Each laboratory should investigate the transferability of the expected values to its own patient population and if necessary determine its own reference ranges.

### Specific performance data

Representative performance data on the analyzers are given below. Results obtained in individual laboratories may differ.

### Precision

Precision was determined using Elecsys reagents, pooled human sera and controls in a protocol (EP5-A2) of the CLSI (Clinical and Laboratory Standards Institute): 2 runs per day in duplication each for 21 days (n = 84). The following results were obtained:

| Elecsys 2010 and <b>cobas e</b> 411 analyzers |                         |                       |         |                        |         |
|-----------------------------------------------|-------------------------|-----------------------|---------|------------------------|---------|
| Sample                                        | Mean<br>µg/L<br>(ng/mL) | Repeatability         |         | Intermediate precision |         |
|                                               |                         | SD<br>µg/L<br>(ng/mL) | CV<br>% | SD<br>µg/L<br>(ng/mL)  | CV<br>% |
| Human serum 1                                 | 1.45                    | 0.101                 | 7.0     | 0.168                  | 11.6    |
| Human serum 2                                 | 11.9                    | 0.411                 | 3.5     | 0.798                  | 6.7     |
| Human serum 3                                 | 19.2                    | 0.780                 | 4.1     | 1.47                   | 7.7     |
| Human serum 4                                 | 376                     | 10.8                  | 2.9     | 17.2                   | 4.6     |
| Human serum 5                                 | 1361                    | 26.5                  | 1.9     | 84.4                   | 6.2     |
| PreciControl Varia 1                          | 134                     | 1.96                  | 1.5     | 2.75                   | 2.1     |
| PreciControl Varia 2                          | 858                     | 15.1                  | 1.8     | 21.7                   | 2.5     |

| MODULAR ANALYTICS E170, <b>cobas e</b> 601 and <b>cobas e</b> 602 analyzers |                         |                       |         |                        |         |
|-----------------------------------------------------------------------------|-------------------------|-----------------------|---------|------------------------|---------|
| Sample                                                                      | Mean<br>µg/L<br>(ng/mL) | Repeatability         |         | Intermediate precision |         |
|                                                                             |                         | SD<br>µg/L<br>(ng/mL) | CV<br>% | SD<br>µg/L<br>(ng/mL)  | CV<br>% |
| Human serum 1                                                               | 1.12                    | 0.139                 | 12.4    | 0.263                  | 23.4    |
| Human serum 2                                                               | 12.3                    | 0.467                 | 3.8     | 0.789                  | 6.4     |
| Human serum 3                                                               | 20.5                    | 0.837                 | 4.1     | 1.67                   | 8.1     |
| Human serum 4                                                               | 392                     | 8.14                  | 2.1     | 16.9                   | 4.3     |

| MODULAR ANALYTICS E170, <b>cobas e</b> 601 and <b>cobas e</b> 602 analyzers |                         |                       |         |                        |         |
|-----------------------------------------------------------------------------|-------------------------|-----------------------|---------|------------------------|---------|
| Sample                                                                      | Repeatability           |                       |         | Intermediate precision |         |
|                                                                             | Mean<br>µg/L<br>(ng/mL) | SD<br>µg/L<br>(ng/mL) | CV<br>% | SD<br>µg/L<br>(ng/mL)  | CV<br>% |
| Human serum 5                                                               | 1449                    | 35.6                  | 2.5     | 92.8                   | 6.4     |
| PreciControl Varia 1                                                        | 140                     | 2.31                  | 1.7     | 3.53                   | 2.5     |
| PreciControl Varia 2                                                        | 900                     | 14.4                  | 1.6     | 25.0                   | 2.8     |

### Method comparison

A comparison of the Ferritin assay, [REF] 03737551 (y) with the Ferritin assay, [REF] 11820982 (x) using clinical samples gave the following correlations:

Number of samples measured: 134

Passing/Bablok<sup>11</sup> Linear regression

$$y = 1.00x + 0.72 \quad y = 0.99x + 4.11$$

$$\tau = 0.984 \quad r = 0.999$$

The sample concentrations were between approximately 2.68 and 1891 µg/L (ng/mL).

### Analytical specificity

Human liver ferritin: 100 % recovery

Human spleen ferritin: 85 % recovery

Human heart ferritin: 1 % recovery

### References

- Wick M, Pinggera W, Lehmann P. Ferritin in Iron Metabolism - Diagnosis of Anemias (second edition). Springer-Verlag 1995; ISBN 3-211-82525-8 and ISBN 0-387-82525-8.
- Arosio P, Levi S, Gabri E, et al. Heterogeneity of ferritin II: Immunological aspects. In: Albertini A, Arosio P, Chiancone E, Drysdale J (eds). Ferritins and isoferritins as biochemical markers. Elsevier, Amsterdam 1984;33-47.
- Kaltwasser JP, Werner E. Serumferritin: Methodische und Klinische Aspekte. Springer Verlag (1980).
- Morikawa K, Oseko F, Morikawa S. A role for ferritin in hematopoiesis and the immune system. Leuk-Lymphoma 1995;18(5-6):429-433.
- Borch-Johnson B. Determination of Iron status: brief review of physiological effects on iron measures. Analyst 1995;120(3):891-903.
- Cook JD, Skikne BS, Baynes RD. Iron deficiency: the global perspective. Adv-Exp-Med-Biol 1994;356:219-228.
- Albertini A, Arosio P, Chiancone E, et al. (eds). Functional aspects of isoferritins. In: Jacobs A, Hodgetts J, Hoy TG. Ferritins and isoferritins as biochemical markers. Elsevier, Amsterdam 1984;113-127.
- Guder WG, Narayanan S, Wisser H, et al. List of Analytes; Preanalytical Variables. Brochure in: Samples: From the Patient to the Laboratory. GIT-Verlag, Darmstadt 1996;14. ISBN 3-928865-22-6.
- Blackmore S, Hamilton M, Lee A, et al. Automated immunoassay methods for ferritin: recovery studies to assess traceability to an international standard. Clin Chem Lab Med 2008;46(10):1450-1457.
- Lotz J, Hafner G, Prellwitz W. Reference Study for Ferritin Assays. Kurzmittellung Clin Lab 1997;43(11):993-994.
- Bablok W, Passing H, Bender R, et al. A general regression procedure for method transformation. Application of linear regression procedures for method comparison studies in clinical chemistry, Part III. J Clin Chem Clin Biochem 1988 Nov;26(11):783-790.

For further information, please refer to the appropriate operator's manual for the analyzer concerned, the respective application sheets, the product information and the Method Sheets of all necessary components (if available in your country).

A point (period/stop) is always used in this Method Sheet as the decimal separator to mark the border between the integral and the fractional parts of a decimal numeral. Separators for thousands are not used.

ms\_03737551190V14.0

# Ferritin

## Ferritin

### Symbols

Roche Diagnostics uses the following symbols and signs in addition to those listed in the ISO 15223-1 standard.

|                                                                                   |                                                     |
|-----------------------------------------------------------------------------------|-----------------------------------------------------|
|  | Contents of kit                                     |
|  | Analyzers/Instruments on which reagents can be used |
|  | Reagent                                             |
|  | Calibrator                                          |
|  | Volume after reconstitution or mixing               |

COBAS, COBAS E, ELECSYS, MODULAR and PRECICONTROL are trademarks of Roche. INTRALIPID is a trademark of Fresenius Kabi AB.

All other product names and trademarks are the property of their respective owners.

Significant additions or changes are indicated by a change bar in the margin.

© 2013, Roche Diagnostics

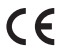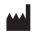

Roche Diagnostics GmbH, Sandhofer Strasse 116, D-68305 Mannheim  
www.roche.com

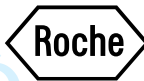

cobas®

05944295500V8.0

# Elecsys Folate RBC



| REF         |             |     | SYSTEM                                                         |
|-------------|-------------|-----|----------------------------------------------------------------|
| 05944295190 | 05944295500 | 100 | <b>cobas e 411</b><br><b>cobas e 601</b><br><b>cobas e 602</b> |

## English

### System information

For **cobas e 411** analyzer: test number 1210

For **cobas e 601** and **cobas e 602** analyzers: Application Code Number 272

### Intended use

This assay is used for the in vitro quantitative determination of folate in erythrocytes (red blood cells, RBC). The electrochemiluminescence binding assay is intended for use on the Elecsys and **cobas e** immunoassay analyzers.

### Summary

Folate belongs to the family of B-group vitamins composed of an aromatic pteridine ring linked through a methylene group to p-aminobenzoic acid and a glutamate residue. Folate (folic acid) is vital for normal cellular functions and plays an essential role in nucleic acid synthesis, methionine regeneration, shuttling and redox reactions of one-carbon units required for normal metabolism and regulation.<sup>1,2</sup>

The folate metabolism can be exemplified as a cycle, where folate facilitates the transfer of one-carbon units from one molecule to another required in various biochemical reactions: for example, tetrahydrofolate (THF) accepts a single carbon unit from serine, which is reduced in a number of steps to 5-methyltetrahydrofolate (5-MTHF). 5-MTHF gives its methyl group to homocysteine, which is - with involvement of methionine synthase and vitamin B12 - enzymatically converted to methionine. The resulting THF starts again the cycle of methyl group synthesis. From methionine, the methyl groups are transferred to S-adenosylmethionine (SAM).<sup>3</sup> SAM serves as a methyl group donor in several methylation reactions, like DNA, RNA and protein methylation.<sup>1</sup>

The methionine cycle is highly sensitive to folate deficiency: with a low folate status, the ability of the cell to re-methylate homocysteine is impaired and this results in increased homocysteine concentrations in plasma.<sup>2</sup>

Folate also plays an essential role in the synthesis of purine and pyrimidine precursors of nucleic acids. Altered distribution of methyl groups and impaired DNA synthesis play an essential role in the development of cancers. Abnormal folate status has also been linked with the development of diseases like cardiovascular diseases, neural tube defects, cleft lip and palate, late pregnancy complications, neurodegenerative and psychiatric disorders.<sup>1,2</sup>

Folate belongs to the group of essential vitamins, i.e. it cannot be synthesized by the human organism and therefore must be absorbed from diet. Primary sources of folates are green and leafy vegetables, sprouts, fruits, brewer's yeast and liver.<sup>1,2</sup>

Folate deficiency can be caused by decreased nutritional intake, poor absorption of ingested folate in the intestine or increased demand of folate, for example during physical activity or pregnancy. Deficiency of folate can also be a result of liver diseases or impaired folate metabolism due to genetic defects or drug interactions.<sup>2</sup>

A clinical manifestation of both folate and vitamin B12 deficiency is the so called megaloblastic (macrocytic) anemia: due to the affected DNA synthesis and cell maturation, especially involving the cells of erythropoiesis, the total count of erythrocytes is significantly reduced. The hemoglobin synthesis capacity however is normal, which leads to abnormally large erythrocyte precursors ("macrocytes" or "megaloblasts"), which have an elevated hemoglobin content ("hyperchromic anemia").<sup>3,4</sup>

Serum folate concentrations may be affected by recent folate intakes, whereas red blood cell (RBC) folate is a measure of the folate intake across the 90-120 days lifespan of erythrocytes. Thus, folate concentrations in RBC give a more accurate picture of a patient's underlying folate status than serum folate concentrations, and are considered by experts as the better measure for folate status.<sup>5</sup>

Because vitamin B12 and folate are closely interrelated in the cellular one-carbon unit metabolism, and also hematologic and clinical consequences of the two vitamin deficiency states might be similar, it is

advisable to determine both parameters simultaneously in patients with the relevant symptoms of vitamin deficiency.<sup>3,4</sup>

### Test principle

Competition principle. Total duration of assay: 27 minutes.

Whole blood treated with anticoagulants (heparin or EDTA) is mixed with ascorbic acid solution and incubated for approximately 90 minutes at 20-25 °C. Lysis of the erythrocytes takes place, with liberation and stabilization of the intracellular folate. The resulting hemolysate sample is then used for subsequent measurement.

- 1st incubation: By incubating 25 µL of hemolysate sample with the folate pretreatment reagents 1 and 2, bound folate is released from endogenous folate binding proteins.
- 2nd incubation: By incubating the pretreated sample with the ruthenium labeled folate binding protein, a folate complex is formed, the amount of which is dependent upon the analyte concentration in the sample.
- 3rd incubation: After addition of streptavidin-coated microparticles and folate labeled with biotin, the unbound sites of the ruthenium labeled folate binding protein become occupied, with formation of a ruthenium labeled folate binding protein-folate biotin complex. The entire complex becomes bound to the solid phase via interaction of biotin and streptavidin.
- The reaction mixture is aspirated into the measuring cell where the microparticles are magnetically captured onto the surface of the electrode. Unbound substances are then removed with ProCell/ProCell M. Application of a voltage to the electrode then induces chemiluminescent emission which is measured by a photomultiplier.
- Results are determined via a calibration curve which is instrument-specifically generated by 2-point calibration and a master curve provided via the reagent barcode or e-barcode.

### Reagents - working solutions

The reagent rackpack (M, R1, R2) is labeled as RBC-FOL.

- PT1 Pretreatment reagent 1 (white cap), 1 bottle, 4 mL:  
Sodium 2-mercaptoethanesulfonate (MESNA) 40 g/L, pH 5.5.
- PT2 Pretreatment reagent 2 (gray cap), 1 bottle, 5 mL:  
Sodium hydroxide 25 g/L.
- M Streptavidin-coated microparticles (transparent cap), 1 bottle, 6.5 mL:  
Streptavidin-coated microparticles 0.72 mg/mL; preservative.
- R1 Folate binding protein~Ru(bpy)<sub>3</sub><sup>2+</sup> (gray cap), 1 bottle, 9 mL:  
Ruthenium labeled folate binding protein 75 µg/L; human serum albumin (stabilizer); borate/phosphate/citrate buffer 70 mmol/L, pH 5.5; preservative.
- R2 Folate-biotin (black cap), 1 bottle, 8 mL:  
Biotinylated folate 17 µg/L; biotin 120 µg/L; human serum albumin (stabilizer); borate buffer 100 mmol/L, pH 9.0; preservative.

### Precautions and warnings

For in vitro diagnostic use.

Exercise the normal precautions required for handling all laboratory reagents.

Disposal of all waste material should be in accordance with local guidelines. Safety data sheet available for professional user on request.

This kit contains components classified as follows in accordance with the Regulation (EC) No. 1272/2008:

2-methyl-2H-isothiazol-3-one hydrochloride

EUH 208 May produce an allergic reaction.

05944295500V8.0

# Elecsys Folate RBC

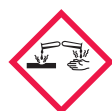

Danger

H290 May be corrosive to metals.

H314 Causes severe skin burns and eye damage.

**Prevention:**

P280 Wear protective gloves/ protective clothing/ eye protection/ face protection.

**Response:**

P301 + P330 IF SWALLOWED: Rinse mouth. Do NOT induce vomiting. + P331

P303 + P361 IF ON SKIN (or hair): Take off immediately all contaminated clothing. Rinse skin with water. + P353

P304 + P340 IF INHALED: Remove person to fresh air and keep comfortable for breathing. + P310 Immediately call a POISON CENTER/ doctor.

P305 + P351 IF IN EYES: Rinse cautiously with water for several minutes. Remove contact lenses, if present and easy to do. + P338 Continue rinsing. Immediately call a POISON CENTER/ doctor. + P310

P390 Absorb spillage to prevent material damage.

Product safety labeling follows EU GHS guidance.

Contact phone: all countries: +49-621-7590

All human material should be considered potentially infectious. All products derived from human blood are prepared exclusively from the blood of donors tested individually and shown to be free from HBsAg and antibodies to HCV and HIV. The testing methods used assays approved by the FDA or cleared in compliance with the European Directive 98/79/EC, Annex II, List A.

However, as no testing method can rule out the potential risk of infection with absolute certainty, the material should be handled with the same level of care as a patient specimen. In the event of exposure, the directives of the responsible health authorities should be followed.<sup>6,7</sup>

Avoid foam formation in all reagents and sample types (specimens, calibrators and controls).

**Reagent handling**

The reagents in the kit have been assembled into a ready-for-use unit that cannot be separated.

All information required for correct operation is read in from the respective reagent barcodes.

**Storage and stability**

Store at 2-8 °C.

Do not freeze.

Store the Elecsys reagent kit **upright** in order to ensure complete availability of the microparticles during automatic mixing prior to use.

|                         |                                  |
|-------------------------|----------------------------------|
| Stability:              |                                  |
| unopened at 2-8 °C      | up to the stated expiration date |
| after opening at 2-8 °C | 8 weeks                          |
| on the analyzers        | 2 weeks                          |

**Specimen collection and preparation**

Only the specimens listed below were tested and found acceptable.

Hemolysate prepared from whole blood treated with anticoagulants (Na-heparin or K<sub>3</sub>-EDTA).

▪ *For the determination of folate in RBC:* Determine hematocrit in whole blood samples and record the value.

▪ *Preparation of the hemolysate sample*

Mix 3.0 mL of Folate RBC Hemolyzing Reagent (ascorbic acid solution, 0.2 %) and 100 µL of well-mixed whole blood, avoiding foam formation. Incubate with closed caps for 90 ± 15 minutes at 20-25 °C.

Stability:

Whole blood: 2 hours at 20-25 °C<sup>8</sup>, 24 hours at 2-8 °C, 1 month at -20 °C (± 5 °C) (only EDTA-blood).

Hemolysate sample: 1 month at -20 °C (± 5 °C), freeze only once.

The sample types listed were tested with a selection of sample collection tubes that were commercially available at the time of testing, i.e. not all available tubes of all manufacturers were tested. Sample collection systems from various manufacturers may contain differing materials which could affect the test results in some cases. When processing samples in primary tubes (sample collection systems), follow the instructions of the tube manufacturer.

Samples should not subsequently be altered with additives (biocides, anti-oxidants or substances possibly changing the pH of the sample) in order to avoid erroneous folate recovery.

Ensure the samples, calibrators and controls are at 20-25 °C prior to measurement.

Due to possible evaporation effects, samples, calibrators and controls on the analyzers should be analyzed/measured within 2 hours.

If measurements cannot be carried out within 2 hours please store the hemolysate sample at -20 °C (± 5 °C).

**Materials provided**

See "Reagents – working solutions" section for reagents.

**Materials required (but not provided)**

- [REF] 05944309190, Folate RBC CalSet, for 4 x 1.0 mL
  - [REF] 05944317190, Folate RBC Hemolyzing Reagent kit for 4 x 200 mL, contains ascorbic acid
  - General laboratory equipment
  - **cobas e** analyzer
- Additional materials for the **cobas e** 411 analyzer:
- [REF] 11662988122, ProCell, 6 x 380 mL system buffer
  - [REF] 11662970122, CleanCell, 6 x 380 mL measuring cell cleaning solution
  - [REF] 11930346122, Elecsys SysWash, 1 x 500 mL washwater additive
  - [REF] 11933159001, Adapter for SysClean
  - [REF] 11706802001, AssayCup, 60 x 60 reaction cups
  - [REF] 11706799001, AssayTip, 30 x 120 pipette tips
  - [REF] 11800507001, Clean-Liner

Additional materials for **cobas e** 601 and **cobas e** 602 analyzers:

- [REF] 04880340190, ProCell M, 2 x 2 L system buffer
- [REF] 04880293190, CleanCell M, 2 x 2 L measuring cell cleaning solution
- [REF] 03023141001, PC/CC-Cups, 12 cups to prewarm ProCell M and CleanCell M before use
- [REF] 03005712190, ProbeWash M, 12 x 70 mL cleaning solution for run finalization and rinsing during reagent change
- [REF] 03004899190, PreClean M, 5 x 600 mL detection cleaning solution
- [REF] 12102137001, AssayTip/AssayCup, 48 magazines x 84 reaction cups or pipette tips, waste bags
- [REF] 03023150001, WasteLiner, waste bags
- [REF] 03027651001, SysClean Adapter M

Additional materials for all analyzers:

- [REF] 11298500316, ISE Cleaning Solution/Elecsys SysClean, 5 x 100 mL system cleaning solution

05944295500V8.0

# Elecsys Folate RBC



## Assay

The well-mixed hemolysate sample is placed in the sample zone of the analyzer and recorded by entering the sample identification data. Complete determinations on the analyzer within 2 hours after finalizing the preparation of the hemolysate sample.

For optimum performance of the assay follow the directions given in this document for the analyzer concerned. Refer to the appropriate operator's manual for analyzer-specific assay instructions.

Resuspension of the microparticles takes place automatically prior to use. Read in the test-specific parameters via the reagent barcode. If in exceptional cases the barcode cannot be read, enter the 15-digit sequence of numbers.

**cobas e 601** and **cobas e 602** analyzers: PreClean M solution is necessary.

Bring the cooled reagents to approximately 20 °C and place on the reagent disk (20 °C) of the analyzer. Avoid foam formation. The system automatically regulates the temperature of the reagents and the opening/closing of the bottles.

## Calibration

Traceability: This method has been standardized against the Elecsys Folate III assay (REF 04476433190)/RBC application.

The standardization of the Elecsys Folate RBC assay includes the volume correction to account for the preparation of hemolysate sample (1:31 vol/vol).

Every Elecsys reagent set has a barcoded label containing specific information for calibration of the particular reagent lot. The predefined master curve is adapted to the analyzer using the relevant CalSet.

**Calibration frequency:** Calibration must be performed once per reagent lot using fresh reagent (i.e. not more than 24 hours since the reagent kit was registered on the analyzer).

Calibration interval may be extended based on acceptable verification of calibration by the laboratory.

Renewed calibration is recommended as follows:

- after 1 month (28 days) when using the same reagent lot
- after 7 days (when using the same reagent kit on the analyzer)
- as required: e.g. quality control findings outside the defined limits

## Quality control

For quality control, use commercially available whole blood control material.

Controls for the various concentration ranges should be run individually at least once every 24 hours when the test is in use, once per reagent kit, and following each calibration.

The control intervals and limits should be adapted to each laboratory's individual requirements. Values obtained should fall within the defined limits. Each laboratory should establish corrective measures to be taken if values fall outside the defined limits.

If necessary, repeat the measurement of the samples concerned.

Follow the applicable government regulations and local guidelines for quality control.

## Calculation

### 1. Whole blood folate (from hemolysate sample)

The standardization of the Elecsys Folate RBC assay includes the volume correction to account for the preparation of hemolysate sample (1:31 vol/vol).

The analyzer automatically calculates the analyte concentration of each sample in nmol/L or ng/mL.

Conversion factors: nmol/L x 0.44 = ng/mL  
ng/mL x 2.27 = nmol/L

### 2. RBC folate

To calculate the folate concentration in the erythrocyte fraction of the sample (**RBC folate**), the predetermined sample specific hematocrit value must be taken into account using the following equation:

$$\text{RBC folate} = \frac{\text{analyzer result}}{\% \text{ hematocrit}} \times 100$$

## Limitations - interference

The assay is unaffected by icterus (bilirubin < 564 µmol/L or < 33 mg/dL), lipemia (Intralipid < 1500 mg/dL), biotin (< 86.1 nmol/L or < 21 ng/mL), IgG < 16 g/L and IgA < 4.0 g/L.

Criterion: Recovery within ± 10 % of initial value with samples > 155 ng/mL and ≤ ± 15.5 ng/mL with samples ≤ 155 ng/mL.

Samples should not be taken from patients receiving therapy with high biotin doses (i.e. > 5 mg/day) until at least 8 hours following the last biotin administration.

No interference was observed from rheumatoid factors up to a concentration of 1000 IU/mL.

In vitro tests were performed on 16 commonly used pharmaceuticals and in addition on human erythropoietin. No interference with the assay was found.

It is contraindicated to measure samples of patients receiving therapy with certain pharmaceuticals, e.g. methotrexate or leucovorin, because of the cross-reactivity of folate binding protein with these compounds.

In rare cases, interference due to extremely high titers of antibodies to analyte-specific antibodies, streptavidin or ruthenium can occur. These effects are minimized by suitable test design.

For diagnostic purposes, the results should always be assessed in conjunction with the patient's medical history, clinical examination and other findings.

In rare cases, samples with low erythrocyte folate concentration, but high serum folate concentration can occur. In these cases, a correction of the folate concentration in erythrocytes by the serum folate concentration with the following equation is recommended\*:

\* expected values can be used as an indicator for high serum folate concentration

Corrected RBC folate concentration =

$$\text{RBC folate concentration} - \left( \text{serum folate concentration} \times \frac{100 - \% \text{ hematocrit}}{\% \text{ hematocrit}} \right)$$

### Example

RBC folate concentration: 241 (ng/mL RBC);  
serum folate concentration: 10.5 (ng/mL S);  
hematocrit measured (%) = 45

Corrected RBC folate concentration =

$$241 \text{ ng/mL RBC} - \left( 10.5 \text{ ng/mL S} \times \frac{100 - 45}{45} \right) = 228 \text{ ng/mL RBC}$$

## Limits and ranges

### Measuring range

120-620 ng/mL or 272-1407 nmol/L (defined by the Limit of Quantitation and the maximum of the master curve). Values below the Limit of Quantitation are reported as < 120 ng/mL (< 272 nmol/L). Values above the measuring range are reported as > 620 ng/mL (> 1407 nmol/L). Values are not corrected for the sample hematocrit.

### Lower limits of measurement

Limit of Blank, Limit of Detection and Limit of Quantitation:

Limit of Blank = 20.0 ng/mL

Limit of Detection = 46.5 ng/mL

Limit of Quantitation = 120 ng/mL

The Limit of Blank, Limit of Detection and Limit of Quantitation were determined in accordance with the CLSI (Clinical and Laboratory Standards Institute) EP17-A requirements.

The Limit of Blank is the 95<sup>th</sup> percentile value from n ≥ 60 measurements of analyte-free samples over several independent series. The Limit of Blank corresponds to the concentration below which analyte-free samples are found with a probability of 95 %.

The Limit of Detection is determined based on the Limit of Blank and the standard deviation of low concentration samples. The Limit of Detection corresponds to the lowest analyte concentration which can be detected (value above the Limit of Blank with a probability of 95 %).

The Limit of Quantitation is defined as the lowest amount of analyte in a sample that can be accurately quantitated with a total allowable relative

05944295500V8.0

# Elecsys Folate RBC



error of  $\leq 30\%$ . It has been determined using low concentration folate samples.

## Dilution

Hemolysate samples with folate concentrations above the measuring range can be diluted manually with Elecsys Folate RBC Hemolyzing Reagent (ascorbic acid solution, 0.2%). The recommended dilution is 1:2. The concentration of the diluted sample must be  $> 265$  ng/mL or  $> 602$  nmol/L. After manual dilution, multiply the results by the dilution factor 2.

## Expected values

The values shown below were measured on samples from an apparently healthy population, using the Elecsys Folate III/RBC application. The values can be applied for the Elecsys Folate RBC assay on all Elecsys and **cobas e** analyzers. The calculation is based on 290 sera (96 men, 194 women) from an European population. The age range was between 18 and 65 years. Pregnant or lactating women were excluded. The reference population was selected according to normal homocysteine values. The following values were obtained:

| Whole blood folate (from hemolysate samples) |     |        |       |                                                  |         |
|----------------------------------------------|-----|--------|-------|--------------------------------------------------|---------|
|                                              | N   | Median |       | 2.5 <sup>th</sup> -97.5 <sup>th</sup> percentile |         |
|                                              |     | nmol/L | ng/mL | nmol/L                                           | ng/mL   |
| Europe                                       | 290 | 673    | 296   | 481-1212                                         | 212-534 |

The measured hematocrit value in this study showed a range from 37.1-46.1%.

| RBC folate (folate in erythrocyte fraction) |     |        |       |                                                  |          |
|---------------------------------------------|-----|--------|-------|--------------------------------------------------|----------|
|                                             | N   | Median |       | 2.5 <sup>th</sup> -97.5 <sup>th</sup> percentile |          |
|                                             |     | nmol/L | ng/mL | nmol/L                                           | ng/mL    |
| Europe                                      | 290 | 1657   | 730   | 1187-2854                                        | 523-1257 |

If pathologically low hematocrit values are considered for calculation of RBC folate in the erythrocyte fraction, elevated RBC folate concentrations may be observed. No medical conclusion should be based on the calculation considering hematocrit values in such cases. Instead, whole blood folate results (from hemolysate samples) and suitable expected values may be used.

Each laboratory should investigate the transferability of the expected values to its own patient population and if necessary determine its own reference ranges.

## Specific performance data

Representative performance data on the analyzers are given below. Results obtained in individual laboratories may differ.

## Precision

Precision was determined using Elecsys reagents and hemolysate samples in a protocol (EP5-A2) of the CLSI (Clinical and Laboratory Standards Institute): 2 runs per day in duplicate each for 21 days ( $n = 84$ ). Results are given as whole blood folate (from hemolysate sample). The following results were obtained:

| cobas e 411 analyzer |        |       |               |       |     |                        |       |      |
|----------------------|--------|-------|---------------|-------|-----|------------------------|-------|------|
| Sample               | Mean   |       | Repeatability |       |     | Intermediate precision |       |      |
|                      | SD     |       | CV            |       | SD  |                        | CV    |      |
|                      | nmol/L | ng/mL | nmol/L        | ng/mL | %   | nmol/L                 | ng/mL | %    |
| HL <sup>a)</sup> 1   | 154    | 68.0  | 11.7          | 5.17  | 7.6 | 21.9                   | 9.65  | 14.2 |
| HL 2                 | 352    | 155   | 17.5          | 7.73  | 5.0 | 27.7                   | 12.2  | 7.9  |
| HL 3                 | 618    | 272   | 25.4          | 11.2  | 4.1 | 38.4                   | 16.9  | 6.2  |
| HL 4                 | 1195   | 527   | 38.8          | 17.1  | 3.3 | 56.3                   | 24.8  | 4.7  |

a) HL = Hemolysate

| cobas e 601 and cobas e 602 analyzers |        |       |               |       |     |                        |       |      |
|---------------------------------------|--------|-------|---------------|-------|-----|------------------------|-------|------|
| Sample                                | Mean   |       | Repeatability |       |     | Intermediate precision |       |      |
|                                       | SD     |       | CV            |       | SD  |                        | CV    |      |
|                                       | nmol/L | ng/mL | nmol/L        | ng/mL | %   | nmol/L                 | ng/mL | %    |
| HL 1                                  | 138    | 61.0  | 12.1          | 5.31  | 8.8 | 14.3                   | 6.32  | 10.4 |
| HL 2                                  | 434    | 191   | 26.1          | 11.5  | 6.0 | 28.4                   | 12.5  | 6.5  |
| HL 3                                  | 586    | 258   | 32.0          | 14.1  | 5.5 | 34.3                   | 15.1  | 5.9  |
| HL 4                                  | 1317   | 580   | 29.1          | 12.8  | 2.2 | 44.7                   | 19.7  | 3.4  |

## Method comparison

a) A comparison of the Elecsys Folate RBC assay (calibrated with Folate RBC CalSet; y) and the Elecsys Folate III/RBC application (calibrated with Folate III CalSet; x) using hemolyzed clinical samples gave the following correlations (ng/mL). Results are given as whole blood folate (from hemolysate sample).

Number of samples measured: 187

Passing/Bablok<sup>9</sup> Linear regression

$$y = 1.02x - 14.1$$

$$y = 1.00x - 12.0$$

$$r = 0.869$$

$$r = 0.985$$

The sample concentrations were between 151 and 551 ng/mL (343 and 1251 nmol/L).

b) A comparison of the Elecsys Folate RBC assay on the MODULAR ANALYTICS E170 analyzer (y) with the Elecsys Folate RBC assay on the Elecsys 2010 analyzer (x) (both tests have been calibrated with Folate RBC CalSet) using hemolyzed clinical samples gave the following correlations (ng/mL). Results are given as whole blood folate (from hemolysate sample).

Number of samples measured: 187

Passing/Bablok Linear regression

$$y = 1.04x + 1.94$$

$$y = 1.02x + 8.07$$

$$r = 0.814$$

$$r = 0.970$$

The sample concentrations were between 137 and 557 ng/mL (311 and 1264 nmol/L).

## References

- Nazki FH, Sameer AS, Ganaie BA. Folate: Metabolism, genes, polymorphisms and the associated diseases. *Gene* 2014;533(1):11-20.
- Scaglione F, Panzavolta G. Folate, folic acid and 5-methyltetrahydrofolate are not the same thing. *Xenobiotica* 2014;44(5):480-488.
- Reynolds EH. The neurology of folic acid deficiency. *Handb Clin Neurol* 2014;120:927-43.
- Wick M, Pinggera W, Lehmann P. *Clinical Aspects and Laboratory. Iron metabolism, Anemias*. Springer Verlag, Wien, New York, 6th edition 2011:41-42.
- Yetley EA, Pfeiffer CM, Phinney KW, et al. Biomarkers of folate status in NHANES: a roundtable summary. *Am J Clin Nutr* 2011;94(1):303S-312S.
- Occupational Safety and Health Standards: Bloodborne pathogens. (29 CFR Part 1910.1030). Fed. Register.
- Directive 2000/54/EC of the European Parliament and Council of 18 September 2000 on the protection of workers from risks related to exposure to biological agents at work.
- Eijdsden M, van der Wal MF, Hornstra G, et al. Can whole blood samples be stored over 24 hours without compromising stability of C-Reactive Protein, Retinol, Ferritin, Folic Acid and Fatty Acids in Epidemiology Research? *Clin Chem* 2005;51(1):230-232.
- Bablok W, Passing H, Bender R, et al. A general regression procedure for method transformation. Application of linear regression procedures for method comparison studies in clinical chemistry, Part III. *J Clin Chem Clin Biochem* 1988 Nov;26(11):783-790.

05944295500V8.0

# Elecsys Folate RBC



For further information, please refer to the appropriate operator's manual for the analyzer concerned, the respective application sheets, the product information and the Method Sheets of all necessary components (if available in your country).

A point (period/stop) is always used in this Method Sheet as the decimal separator to mark the border between the integral and the fractional parts of a decimal numeral. Separators for thousands are not used.

## Symbols

Roche Diagnostics uses the following symbols and signs in addition to those listed in the ISO 15223-1 standard (for USA: see [dialog.roche.com](http://dialog.roche.com) for definition of symbols used):

|                                                                                   |                                                     |
|-----------------------------------------------------------------------------------|-----------------------------------------------------|
|  | Contents of kit                                     |
|  | Analyzers/Instruments on which reagents can be used |
|  | Reagent                                             |
|  | Calibrator                                          |
|  | Volume after reconstitution or mixing               |
|  | Global Trade Item Number                            |

COBAS, COBAS E, ELECSYS and PRECICONTROL are trademarks of Roche. INTRALIPID is a trademark of Fresenius Kabi AB.

All other product names and trademarks are the property of their respective owners.

Additions, deletions or changes are indicated by a change bar in the margin.

© 2020, Roche Diagnostics

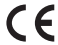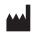

Roche Diagnostics GmbH, Sandhofer Strasse 116, D-68305 Mannheim  
[www.roche.com](http://www.roche.com)

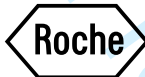



0004628918190c501V12.0

# CRPHS

**cobas**<sup>®</sup>**Cardiac C-Reactive Protein (Latex) High Sensitive****Order information**

| REF          | CONTENT                                                       | Analyzer(s) on which <b>cobas c</b> pack(s) can be used                      |
|--------------|---------------------------------------------------------------|------------------------------------------------------------------------------|
| 04628918 190 | Cardiac C-Reactive Protein (Latex) High Sensitive (300 tests) | System-ID 07 6866 9 Roche/Hitachi <b>cobas c</b> 311, <b>cobas c</b> 501/502 |
| 11355279 216 | Calibrator f.a.s. Proteins (5 x 1 mL)                         | Code 656                                                                     |
| 11355279 160 | Calibrator f.a.s. Proteins (5 x 1 mL, for USA)                | Code 656                                                                     |
| 20766321 322 | CRP T Control N (5 x 0.5 mL)                                  | Code 235                                                                     |
| 10557897 122 | Precinorm Protein (3 x 1 mL)                                  | Code 302                                                                     |
| 10557897 160 | Precinorm Protein (3 x 1 mL, for USA)                         | Code 302                                                                     |
| 05117003 190 | PreciControl ClinChem Multi 1 (20 x 5 mL)                     | Code 391                                                                     |
| 05947626 190 | PreciControl ClinChem Multi 1 (4 x 5 mL)                      | Code 391                                                                     |
| 05947626 160 | PreciControl ClinChem Multi 1 (4 x 5 mL, for USA)             | Code 391                                                                     |
| 04489357 190 | Diluent NaCl 9 % (50 mL)                                      | System-ID 07 6869 3                                                          |

**English****System information**For **cobas c** 311/501 analyzers:**CRPHS**: ACN 217For **cobas c** 502 analyzer:**CRPHS**: ACN 8217**Intended use**

In vitro test for the quantitative determination of C-reactive protein (CRP) in human serum and plasma on Roche/Hitachi **cobas c** systems. Measurement of CRP is of use for the detection and evaluation of inflammatory disorders and associated diseases, infection and tissue injury. Highly sensitive measurement of CRP may also be used as an aid in the assessment of the risk of future coronary heart disease. When used as an adjunct to other laboratory evaluation methods of acute coronary syndromes, it may also be an additional independent indicator of recurrent event prognosis in patients with stable coronary disease or acute coronary syndrome.

**Summary**<sup>1,2,3,4,5,6,7,8,9,10,11,12,13,14,15,16,17,18,19,20,21</sup>

C-reactive protein is the classic acute phase protein in inflammatory reactions. It is synthesized by the liver and consists of five identical polypeptide chains that form a five-member ring having a molecular weight of 105000 daltons. CRP is the most sensitive of the acute phase reactants and its concentration increases rapidly during inflammatory processes. Complexed CRP activates the complement system beginning with C1q. CRP then initiates opsonization and phagocytosis of invading cells, but its main function is to bind and detoxify endogenous toxic substances produced as a result of tissue damage.

CRP assays are used to detect systemic inflammatory processes (apart from certain types of inflammation such as SLE and Colitis ulcerosa); to assess treatment of bacterial infections with antibiotics; to detect intrauterine infections with concomitant premature amniorrhexis; to differentiate between active and inactive forms of disease with concurrent infection, e.g. in patients suffering from SLE or Colitis ulcerosa; to therapeutically monitor rheumatic disease and assess anti-inflammatory therapy; to determine the presence of post-operative complications at an early stage, such as infected wounds, thrombosis and pneumonia, and to distinguish between infection and bone marrow transplant rejection.

Sensitive CRP measurements have been used and discussed for early detection of infection in pediatrics and risk assessment of coronary heart disease. Several studies came to the conclusion that the highly sensitive measurement of CRP could be used as a marker to predict the risk of coronary heart disease in apparently healthy persons and as an indicator of recurrent event prognosis. Increases in CRP values are non-specific and should not be interpreted without a complete clinical history. The American Heart Association and the Centers for Disease Control and Prevention have made several recommendations concerning the use of high sensitivity C-Reactive Protein (hsCRP) in cardiovascular risk assessment.<sup>21</sup> Testing for any risk assessment should not be performed while there is an indication of infection, systemic inflammation or trauma. Patients with persistently unexplained hsCRP levels above 10 mg/L (95.2 nmol/L) should be evaluated for non-cardiovascular etiologies. When using hsCRP to assess the risk of coronary heart disease, measurements should be made on metabolically stable patients and compared to previous values.

Optimally, the average of hsCRP results repeated two weeks apart should be used for risk assessment. Screening the entire adult population for hsCRP is not recommended, and hsCRP is not a substitute for traditional cardiovascular risk factors. Acute coronary syndrome management should not depend solely on hsCRP measurements. Similarly, application of secondary prevention measures should be based on global risk assessment and not solely on hsCRP measurements. Serial measurements of hsCRP should not be used to monitor treatment.

Various assay methods are available for CRP determination, such as nephelometry and turbidimetry. The Roche CRP assay is based on the principle of particle-enhanced immunological agglutination.

**Test principle**<sup>22,23</sup>

Particle enhanced immunoturbidimetric assay.

Human CRP agglutinates with latex particles coated with monoclonal anti-CRP antibodies. The precipitate is determined turbidimetrically.

**Reagents - working solutions**

**R1** TRIS buffer with bovine serum albumin and immunoglobulins (mouse); preservative; stabilizers

**R2** Latex particles coated with anti-CRP (mouse) in glycine buffer; preservative; stabilizers

R1 is in position B and R2 is in position C.

**Precautions and warnings**

For in vitro diagnostic use.

Exercise the normal precautions required for handling all laboratory reagents.

Disposal of all waste material should be in accordance with local guidelines. Safety data sheet available for professional user on request.

For USA: Caution: Federal law restricts this device to sale by or on the order of a physician.

**Reagent handling**

Ready for use

Mix **cobas c** pack well before placing on the analyzer.

Carefully invert reagent container several times prior to use to ensure that the reagent components are mixed.

**Storage and stability****CRPHS**

Shelf life at 2-8 °C:

See expiration date on **cobas c** pack label.

On-board in use and refrigerated on the analyzer:

12 weeks

**Diluent NaCl 9 %**

Shelf life at 2-8 °C:

See expiration date on **cobas c** pack label.

On-board in use and refrigerated on the analyzer:

12 weeks

0004628918190c501V12.0

# CRPHS



## Cardiac C-Reactive Protein (Latex) High Sensitive

### Specimen collection and preparation

For specimen collection and preparation only use suitable tubes or collection containers.

Only the specimens listed below were tested and found acceptable. Serum.

Plasma: Li-heparin and K<sub>2</sub>-EDTA plasma

The sample types listed were tested with a selection of sample collection tubes that were commercially available at the time of testing, i.e. not all available tubes of all manufacturers were tested. Sample collection systems from various manufacturers may contain differing materials which could affect the test results in some cases. When processing samples in primary tubes (sample collection systems), follow the instructions of the tube manufacturer.

Centrifuge samples containing precipitates before performing the assay.

See the limitations and interferences section for details about possible sample interferences.

Sample stability claims were established by experimental data by the manufacturer or based on reference literature and only for the temperatures/time frames as stated in the method sheet. It is the responsibility of the individual laboratory to use all available references and/or its own studies to determine specific stability criteria for its laboratory.

|                          |                           |
|--------------------------|---------------------------|
| Stability: <sup>24</sup> | 11 days at 15-25 °C       |
|                          | 2 months at 2-8 °C        |
|                          | 3 years at (-15)-(-25) °C |

### Materials provided

See "Reagents – working solutions" section for reagents.

### Materials required (but not provided)

- See "Order information" section
- General laboratory equipment

### Assay

For optimum performance of the assay follow the directions given in this document for the analyzer concerned. Refer to the appropriate operator's manual for analyzer-specific assay instructions.

The performance of applications not validated by Roche is not warranted and must be defined by the user.

### Application for serum and plasma

#### cobas c 311 test definition

|                              |                            |       |  |
|------------------------------|----------------------------|-------|--|
| Assay type                   | Rate A                     |       |  |
| Reaction time / Assay points | 10/7-57                    |       |  |
| Wavelength (sub/main)        | – /546 nm                  |       |  |
| Reaction direction           | Increase                   |       |  |
| Units                        | mg/L (nmol/L, mg/dL)       |       |  |
| Reagent pipetting            | Diluent (H <sub>2</sub> O) |       |  |
| R1                           | 82 µL                      | 42 µL |  |
| R2                           | 28 µL                      | 20 µL |  |

| Sample volumes | Sample | Sample dilution |                |
|----------------|--------|-----------------|----------------|
|                |        | Sample          | Diluent (NaCl) |
| Normal         | 6 µL   | –               | –              |
| Decreased      | 6 µL   | 10 µL           | 140 µL         |
| Increased      | 6 µL   | –               | –              |

#### cobas c 501 test definition

|                              |           |  |  |
|------------------------------|-----------|--|--|
| Assay type                   | Rate A    |  |  |
| Reaction time / Assay points | 10/12-70  |  |  |
| Wavelength (sub/main)        | – /546 nm |  |  |

|                    |                            |       |  |
|--------------------|----------------------------|-------|--|
| Reaction direction | Increase                   |       |  |
| Units              | mg/L (nmol/L, mg/dL)       |       |  |
| Reagent pipetting  | Diluent (H <sub>2</sub> O) |       |  |
| R1                 | 82 µL                      | 42 µL |  |
| R2                 | 28 µL                      | 20 µL |  |

| Sample volumes | Sample | Sample dilution |                |
|----------------|--------|-----------------|----------------|
|                |        | Sample          | Diluent (NaCl) |
| Normal         | 6 µL   | –               | –              |
| Decreased      | 6 µL   | 10 µL           | 140 µL         |
| Increased      | 6 µL   | –               | –              |

#### cobas c 502 test definition

|                              |                            |       |  |
|------------------------------|----------------------------|-------|--|
| Assay type                   | Rate A                     |       |  |
| Reaction time / Assay points | 10/12-70                   |       |  |
| Wavelength (sub/main)        | – /546 nm                  |       |  |
| Reaction direction           | Increase                   |       |  |
| Units                        | mg/L (nmol/L, mg/dL)       |       |  |
| Reagent pipetting            | Diluent (H <sub>2</sub> O) |       |  |
| R1                           | 82 µL                      | 42 µL |  |
| R2                           | 28 µL                      | 20 µL |  |

| Sample volumes | Sample | Sample dilution |                |
|----------------|--------|-----------------|----------------|
|                |        | Sample          | Diluent (NaCl) |
| Normal         | 6 µL   | –               | –              |
| Decreased      | 6 µL   | 10 µL           | 140 µL         |
| Increased      | 12 µL  | –               | –              |

### Calibration

|                       |                                                                                                                                                               |           |  |
|-----------------------|---------------------------------------------------------------------------------------------------------------------------------------------------------------|-----------|--|
| Calibrators           | S1: H <sub>2</sub> O                                                                                                                                          |           |  |
|                       | S2: C.f.a.s. Proteins                                                                                                                                         |           |  |
|                       | Multiply the lot-specific C.f.a.s. Proteins calibrator value by the factors below to determine the standard concentrations for the 6-point calibration curve: |           |  |
|                       | S2: 0.0125                                                                                                                                                    | S5: 0.100 |  |
|                       | S3: 0.0250                                                                                                                                                    | S6: 0.200 |  |
|                       | S4: 0.0500                                                                                                                                                    |           |  |
| Calibration mode      | Line Graph                                                                                                                                                    |           |  |
| Calibration frequency | Full calibration                                                                                                                                              |           |  |
|                       | • after reagent lot change                                                                                                                                    |           |  |
|                       | • as required following quality control procedures                                                                                                            |           |  |

Calibration interval may be extended based on acceptable verification of calibration by the laboratory.

Traceability: This method has been standardized against the reference preparation of the IRMM (Institute for Reference Materials and Measurements) BCR470/CRM470 (RPPHS - Reference Preparation for Proteins in Human Serum).<sup>25</sup>

### Quality control

For quality control, use control materials as listed in the "Order information" section.

In addition, other suitable control material can be used.

The control intervals and limits should be adapted to each laboratory's individual requirements. Values obtained should fall within the defined



0004628918190c501V12.0

# CRPHS

## Cardiac C-Reactive Protein (Latex) High Sensitive

determined using the corresponding reagent on a Roche/Hitachi 917 analyzer (x).

Sample size (n) = 192

Passing/Bablok<sup>33</sup> Linear regression

$y = 0.992x + 0.254$  mg/L  $y = 0.946x + 0.514$  mg/L

$\tau = 0.944$   $r = 0.996$

The sample concentrations were between 0.500 and 19.7 mg/L (4.76 and 188 nmol/L, 0.050 and 1.97 mg/dL).

### References

- Henry JB, ed. *Clinical Diagnosis and Management by Laboratory Methods*. Vol II. Philadelphia, Pa: WB Saunders 1979.
- Greiling H, Gressner AM, eds. *Lehrbuch der Klinischen Chemie und Pathobiochemie*, 3rd ed. Stuttgart/New York: Schattauer Verlag 1995:234-236.
- Thomas L, Messenger M. *Pathobiochemie und Labordiagnostik der Entzündung*. Lab med 1993;17:179-194.
- Young B, Gleeson M, Cripps AW. C-reactive protein: A critical review. *Pathology* 1991;23:118-124.
- Tietz NW. *Clinical Guide to Laboratory Tests*. 3rd ed. Philadelphia, Pa: WB Saunders Co; 1995.
- Wasunna A, Whitelaw A, Gallimore R, et al. C-reactive protein and bacterial infection in preterm infants. *Eur J Pediatr* 1990 Mar;149(6):424-427.
- Liuzzo G, Biasucci LM, Gallimore JR, et al. The prognostic value of C-reactive protein and serum amyloid A protein in severe unstable angina. *N Engl J Med* 1994;331:417-424.
- Kuller LH, Tracy RP, Shaten J, et al. Relation of c-reactive protein and coronary heart disease in the MRFIT nested case control study. *Am J Epidemiol* 1996;144:537-547.
- Ridker PM, Glynn RJ, Hennekens CH, et al. C-Reactive Protein Adds to the Predictive Value of Total and HDL Cholesterol in Determining Risk of First Myocardial Infarction. *Circulation* 1998;97:2007-2011.
- Ridker PM, Cushman M, Stampfer MJ, et al. Plasma Concentration of C-Reactive Protein and Risk of Developing Peripheral Vascular Disease. *Circulation* 1998;97:425-428.
- Ridker PM, Cushman M, Stampfer MJ, et al. Inflammation, Aspirin, and the Risk of Cardiovascular Disease in Apparently Healthy Men. *N Engl J Med* 1997;336(14):973-979.
- Danesh J, Wheeler JG, Hirschfield GM, et al. C-Reactive Protein and Other Circulating Markers of Inflammation in the Prediction of Coronary Heart Disease. *N Engl J Med* 2004;350(14):1387-1397.
- Ridker PM, Hennekens CH, Buring JE, et al. C-Reactive Protein and Other Markers of Inflammation in the Prediction of Cardiovascular Disease in Women. *N Engl J Med* 2000;342(12):836-843.
- Tracy RP, Lemaitre RN, Psaty BM, et al. Relationship of C-Reactive Protein to Risk of Cardiovascular Disease in the Elderly. *Arterioscler Thromb Vasc Biol* 1997;17:1121-1127.
- Järvisalo MJ, Harmoinen A, Hakonen M, et al. Elevated Serum C-Reactive Protein Levels and Early Arterial Changes in Healthy Children. *Arterioscler Thromb Vasc Biol*, (August) 2002;1323-1328.
- Almagor M, Keren A, Banai S. Increased C-Reactive Protein Level after Coronary Stent Implantation in Patients with Stable Coronary Artery Disease. *American Heart Journal* 2003;145 (2):248-253.
- Katritsis D, Korovesis S, Giazitzoglou E, et al. C-Reactive Protein Concentrations and Angiographic Characteristics of Coronary Lesions. *Clin Chem* 2001;47(5):882-886.
- Beattie MS, Shlipak MG, Liu H, et al. C-Reactive Protein and Ischemia in Users and Nonusers of  $\beta$ -Blockers and Statins. *Circulation* 2003;107:245-250.
- Plenge JK, Hernandez TL, Weil KM, et al. Simvastatin Lowers C-Reactive Protein Within 14 Days. An Effect Independent of Low-Density Lipoprotein Cholesterol Reduction. *Circulation* 2002;106:1447-1452.

**cobas**<sup>®</sup>

- Lindahl B, Toss H, Siegbahn A, et al. Markers of Myocardial Damage and Inflammation in Relation to Long-Term Mortality in Unstable Coronary Artery Disease. *N Engl J Med* 2000;343(16):1139-1147.
- Pearson TA, Mensah GA, Alexander RW, et al. Markers of Inflammation and Cardiovascular Disease. Application to Clinical and Public Health Practice. A Statement for Healthcare Professionals From the Centers for Disease Control and Prevention and the American Heart Association. *Circulation* 2003;107:499-511.
- Price CP, Trull AK, Berry D, et al. Development and validation of a particle-enhanced turbidimetric immunoassay for C-reactive protein. *J Immunol Methods* 1987;99:205-211.
- Eda S, Kaufmann J, Roos W, et al. Development of a New Microparticle-Enhanced Turbidimetric Assay for C-reactive Protein with Superior Features in Analytical Sensitivity and Dynamic Range. *J Clin Lab Anal* 1998;12:137-144.
- Use of Anticoagulants in Diagnostic Laboratory Investigations. WHO Publication WHO/DIL/LAB/99.1 Rev. 2: Jan 2002.
- Baudner S, Bienvenu J, Blirup-Jensen S, et al. The certification of a matrix reference material for immunochemical measurement of 14 human serum proteins CRM470. Report EUR 15243 EN 1993;1-186.
- Glick MR, Ryder KW, Jackson SA. Graphical Comparisons of Interferences in Clinical Chemistry Instrumentation. *Clin Chem* 1986;32:470-475.
- Breuer J. Report on the Symposium "Drug effects in Clinical Chemistry Methods". *Eur J Clin Chem Clin Biochem* 1996;34:385-386.
- Sonntag O, Scholer A. Drug interference in clinical chemistry: recommendation of drugs and their concentrations to be used in drug interference studies. *Ann Clin Biochem* 2001;38:376-385.
- Bakker AJ, Mücke M. Gammopathy interference in clinical chemistry assays: mechanisms, detection and prevention. *Clin Chem Lab Med* 2007;45(9):1240-1243.
- Dati F, Schumann G, Thomas L, et al. Consensus of a group of professional societies and diagnostic companies on guidelines for interim reference ranges for 14 proteins in serum based on the standardization against the IFCC/BCR/CAP reference material (CRM 470). *Eur J Clin Chem Clin Biochem* 1996;34:517-520.
- Ridker PM. Clinical Application of C-Reactive Protein for Cardiovascular Disease Detection and Prevention. *Circulation* 2003;107:363-369.
- Schlebusch H, Liappis N, Kalina E, et al. High Sensitive CRP and Creatinine: Reference Intervals from Infancy to Childhood. *J Lab Med* 2002;26:341-346.
- Bablok W, Passing H, Bender R, et al. A general regression procedure for method transformation. Application of linear regression procedures for method comparison studies in clinical chemistry, Part III. *J Clin Chem Clin Biochem* 1988 Nov;26(11):783-790.

A point (period/stop) is always used in this Method Sheet as the decimal separator to mark the border between the integral and the fractional parts of a decimal numeral. Separators for thousands are not used.

### Symbols

Roche Diagnostics uses the following symbols and signs in addition to those listed in the ISO 15223-1 standard (for USA: see <https://usdiagnostics.roche.com> for definition of symbols used):

|                                                                                     |                                       |
|-------------------------------------------------------------------------------------|---------------------------------------|
|  | Contents of kit                       |
|  | Volume after reconstitution or mixing |
|  | Global Trade Item Number              |

0004628918190c501V12.0

# CRPHS

## Cardiac C-Reactive Protein (Latex) High Sensitive

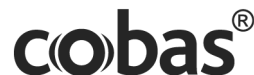

### FOR US CUSTOMERS ONLY: LIMITED WARRANTY

Roche Diagnostics warrants that this product will meet the specifications stated in the labeling when used in accordance with such labeling and will be free from defects in material and workmanship until the expiration date printed on the label. THIS LIMITED WARRANTY IS IN LIEU OF ANY OTHER WARRANTY, EXPRESS OR IMPLIED, INCLUDING ANY IMPLIED WARRANTY OF MERCHANTABILITY OR FITNESS FOR PARTICULAR PURPOSE. IN NO EVENT SHALL ROCHE DIAGNOSTICS BE LIABLE FOR INCIDENTAL, INDIRECT, SPECIAL OR CONSEQUENTIAL DAMAGES.

COBAS, COBAS C, PRECICONTROL and PRECINORM are trademarks of Roche. All other product names and trademarks are the property of their respective owners. Additions, deletions or changes are indicated by a change bar in the margin. © 2019, Roche Diagnostics



 Roche Diagnostics GmbH, Sandhofer Strasse 116, D-68305 Mannheim  
www.roche.com

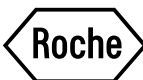

Distribution in USA by:  
Roche Diagnostics, Indianapolis, IN  
US Customer Technical Support 1-800-428-2336

For peer review only

07559992500V4.0

# Elecsys Folate III

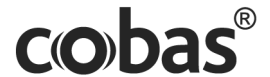

| REF         |             |     | SYSTEM                                    |
|-------------|-------------|-----|-------------------------------------------|
| 07559992190 | 07559992500 | 100 | cobas e 411<br>cobas e 601<br>cobas e 602 |

**English**

**System information**

For **cobas e 411** analyzer: test number 1520  
 For **cobas e 601** and **cobas e 602** analyzers: Application Code Number 721

**Intended use**

Binding assay for the in vitro quantitative determination of folate in human serum and plasma.

The binding assay is intended for use on Elecsys and **cobas e** immunoassay analyzers.

**Summary**

Folate belongs to the family of B-group vitamins composed of an aromatic pteridine ring linked through a methylene group to p-aminobenzoic acid and a glutamate residue. Folate (folic acid) is vital for normal cellular functions and plays an essential role in nucleic acid synthesis, methionine regeneration, shuttling and redox reactions of one-carbon units required for normal metabolism and regulation.<sup>1,2</sup>

The folate metabolism can be exemplified as a cycle, where folate facilitates the transfer of one-carbon units from one molecule to another required in various biochemical reactions: for example, tetrahydrofolate (THF) accepts a single carbon unit from serine, which is reduced in a number of steps to 5-methyltetrahydrofolate (5-MTHF). 5-MTHF gives its methyl group to homocysteine, which is - with involvement of methionine synthase and vitamin B12 - enzymatically converted to methionine. The resulting THF starts again the cycle of methyl group synthesis. From methionine, the methyl groups are transferred to S-adenosylmethionine (SAM).<sup>3</sup> SAM serves as a methyl group donor in several methylation reactions, like DNA, RNA and protein methylation.<sup>1</sup>

The methionine cycle is highly sensitive to folate deficiency: with a low folate status, the ability of the cell to re-methylate homocysteine is impaired and this results in increased homocysteine concentrations in plasma.<sup>2</sup>

Folate also plays an essential role in the synthesis of purine and pyrimidine precursors of nucleic acids. Altered distribution of methyl groups and impaired DNA synthesis play an essential role in the development of cancers. Abnormal folate status has also been linked with the development of diseases like cardiovascular diseases, neural tube defects, cleft lip and palate, late pregnancy complications, neurodegenerative and psychiatric disorders.<sup>1,2</sup>

Folate belongs to the group of essential vitamins, i.e. it cannot be synthesized by the human organism and therefore must be absorbed from diet. Primary sources of folates are green and leafy vegetables, sprouts, fruits, brewer's yeast and liver.<sup>1,2</sup>

Folate deficiency can be caused by decreased nutritional intake, poor absorption of ingested folate in the intestine or increased demand of folate, for example during physical activity or pregnancy. Deficiency of folate can also be a result of liver diseases or impaired folate metabolism due to genetic defects or drug interactions.<sup>2</sup>

A clinical manifestation of both folate and vitamin B12 deficiency is the so called megaloblastic (macrocytic) anemia: due to the affected DNA synthesis and cell maturation, especially involving the cells of erythropoiesis, the total count of erythrocytes is significantly reduced. The hemoglobin synthesis capacity however is normal, which leads to abnormally large erythrocyte precursors ("macrocytes" or "megaloblasts"), which have an elevated hemoglobin content ("hyperchromic anemia").<sup>3,4</sup>

Because vitamin B12 and folate are closely interrelated in the cellular one-carbon unit metabolism, and also hematologic and clinical consequences of the two vitamin deficiency states might be similar, it is advisable to determine both parameters simultaneously in patients with the relevant symptoms of vitamin deficiency.<sup>3,4</sup>

**Test principle**

Competition principle. Total duration of assay: 27 minutes.

- 1st incubation: By incubating 25 µL of sample with the folate pretreatment reagents 1 and 2, bound folate is released from endogenous folate binding proteins.
- 2nd incubation: By incubating the pretreated sample with the ruthenium labeled folate binding protein, a folate complex is formed, the amount of which is dependent upon the analyte concentration in the sample.
- 3rd incubation: After addition of streptavidin-coated microparticles and folate labeled with biotin, the unbound sites of the ruthenium labeled folate binding protein become occupied, with formation of a ruthenium labeled folate binding protein-folate biotin complex. The entire complex becomes bound to the solid phase via interaction of biotin and streptavidin.
- The reaction mixture is aspirated into the measuring cell where the microparticles are magnetically captured onto the surface of the electrode. Unbound substances are then removed with ProCell/ProCell M. Application of a voltage to the electrode then induces chemiluminescent emission which is measured by a photomultiplier.
- Results are determined via a calibration curve which is instrument-specifically generated by 2-point calibration and a master curve provided via the reagent barcode or e-barcode.

**Reagents - working solutions**

The reagent rackpack (M, R1, R2) and the pretreatment reagents (PT1, PT2) are labeled as Fol III.

- PT1 Pretreatment reagent 1 (white cap), 1 bottle, 4 mL:  
Sodium 2-mercaptoethanesulfonate (MESNA) 40 g/L, pH 5.5.
- PT2 Pretreatment reagent 2 (gray cap), 1 bottle, 5 mL:  
Sodium hydroxide 25 g/L.
- M Streptavidin-coated microparticles (transparent cap), 1 bottle, 6.5 mL:  
Streptavidin-coated microparticles 0.72 mg/mL; preservative.
- R1 Folate binding protein-Ru(bpy)<sub>3</sub><sup>2+</sup> (gray cap), 1 bottle, 9 mL:  
Ruthenium labeled folate binding protein 75 µg/L; human serum albumin (stabilizer); borate/phosphate/citrate buffer 70 mmol/L, pH 5.5; preservative.
- R2 Folate-biotin (black cap), 1 bottle, 8 mL:  
Biotinylated folate 17 µg/L; biotin 120 µg/L; human serum albumin (stabilizer); borate buffer 100 mmol/L, pH 9.0; preservative.

**Precautions and warnings**

For in vitro diagnostic use.  
 Exercise the normal precautions required for handling all laboratory reagents.  
 Disposal of all waste material should be in accordance with local guidelines. Safety data sheet available for professional user on request.

This kit contains components classified as follows in accordance with the Regulation (EC) No. 1272/2008:

2-methyl-2H-isothiazol-3-one hydrochloride

EUH 208 May produce an allergic reaction.

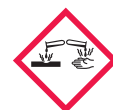

Danger

H290 May be corrosive to metals.

07559992500V4.0

# Elecsys Folate III

H314 Causes severe skin burns and eye damage.

## Prevention:

P280 Wear protective gloves/ protective clothing/ eye protection/ face protection.

## Response:

P301 + P330 IF SWALLOWED: Rinse mouth. Do NOT induce vomiting.  
+ P331

P303 + P361 IF ON SKIN (or hair): Take off immediately all contaminated clothing. Rinse skin with water.  
+ P353

P304 + P340 IF INHALED: Remove person to fresh air and keep comfortable for breathing.  
+ P310 Immediately call a POISON CENTER/ doctor.

P305 + P351 IF IN EYES: Rinse cautiously with water for several minutes. Remove contact lenses, if present and easy to do.  
+ P338 Continue rinsing. Immediately call a POISON CENTER/ doctor.  
+ P310

P390 Absorb spillage to prevent material damage.

Product safety labeling follows EU GHS guidance.

Contact phone: all countries: +49-621-7590

All human material should be considered potentially infectious. All products derived from human blood are prepared exclusively from the blood of donors tested individually and shown to be free from HBsAg and antibodies to HCV and HIV. The testing methods used assays approved by the FDA or cleared in compliance with the European Directive 98/79/EC, Annex II, List A.

However, as no testing method can rule out the potential risk of infection with absolute certainty, the material should be handled with the same level of care as a patient specimen. In the event of exposure, the directives of the responsible health authorities should be followed.<sup>5,6</sup>

Avoid foam formation in all reagents and sample types (specimens, calibrators and controls).

## Reagent handling

The reagents in the kit have been assembled into a ready-for-use unit that cannot be separated.

All information required for correct operation is read in from the respective reagent barcodes.

## Storage and stability

Store at 2-8 °C.

Do not freeze.

Store the Elecsys reagent kit **upright** in order to ensure complete availability of the microparticles during automatic mixing prior to use.

| Stability:              |                                                                                                                                                                                             |
|-------------------------|---------------------------------------------------------------------------------------------------------------------------------------------------------------------------------------------|
| unopened at 2-8 °C      | up to the stated expiration date                                                                                                                                                            |
| after opening at 2-8 °C | 56 days (8 weeks)                                                                                                                                                                           |
| on the analyzers        | 14 days (2 weeks) onboard or<br>28 days (4 weeks) when stored alternatively in the refrigerator and on the analyzer, with the total time onboard on the analyzer not exceeding 10 x 8 hours |

## Specimen collection and preparation

Only the specimens listed below were tested and found acceptable.

Serum collected using standard sampling tubes or tubes containing separating gel.

Li-heparin plasma. Li-heparin plasma tubes containing separating gel can be used.

Criterion: Method comparison serum versus Li-heparin plasma, slope 0.9-1.1 + intercept within  $\pm 2x$  Limit of Blank (LoB), coefficient of correlation  $\geq 0.95$ .

Serum: Stable for 2 hours at 15-25 °C, 48 hours at 2-8 °C, 28 days at -20 °C ( $\pm 5$  °C). Freeze only once. Protect from light. Store the samples at 2-8 °C if they cannot be measured immediately.

Li-heparin plasma: Stable for 2 hours at 15-25 °C, 48 hours at 2-8 °C, 28 days at -20 °C ( $\pm 5$  °C). Freeze only once. Protect from light. Store the samples at 2-8 °C if they cannot be measured immediately.

The sample types listed were tested with a selection of sample collection tubes that were commercially available at the time of testing, i.e. not all available tubes of all manufacturers were tested. Sample collection systems from various manufacturers may contain differing materials which could affect the test results in some cases. When processing samples in primary tubes (sample collection systems), follow the instructions of the tube manufacturer.

Samples should not subsequently be altered with additives (biocides, anti-oxidants or substances possibly changing the pH of the sample) in order to avoid erroneous folate recovery.

Centrifuge samples containing precipitates before performing the assay.

Do not use heat-inactivated samples.

Ensure the samples, calibrators and controls are at 20-25 °C prior to measurement.

Due to possible evaporation effects, samples, calibrators and controls on the analyzers should be analyzed/measured within 2 hours.

Note: Hemolysis may significantly increase folate values due to high concentrations of folate in red blood cells. Therefore, hemolyzed samples are not suitable for use in this assay. Samples for folate determinations should be collected from fasting persons.

## Materials provided

See "Reagents – working solutions" section for reagents.

## Materials required (but not provided)

- [REF] 07560001190, Folate III CalSet, for 4 x 1.0 mL
- [REF] 05618860190, PreciControl Varia, for 4 x 3.0 mL
- [REF] 11732277122, Diluent Universal, 2 x 16 mL sample diluent or [REF] 03183971122, Diluent Universal, 2 x 36 mL sample diluent
- General laboratory equipment

## cobas e analyzer

Additional materials for the **cobas e 411** analyzer:

- [REF] 11662988122, ProCell, 6 x 380 mL system buffer
- [REF] 11662970122, CleanCell, 6 x 380 mL measuring cell cleaning solution
- [REF] 11930346122, Elecsys SysWash, 1 x 500 mL washwater additive
- [REF] 11933159001, Adapter for SysClean
- [REF] 11706802001, AssayCup, 60 x 60 reaction cups
- [REF] 11706799001, AssayTip, 30 x 120 pipette tips
- [REF] 11800507001, Clean-Liner

Additional materials for **cobas e 601** and **cobas e 602** analyzers:

- [REF] 04880340190, ProCell M, 2 x 2 L system buffer
- [REF] 04880293190, CleanCell M, 2 x 2 L measuring cell cleaning solution
- [REF] 03023141001, PC/CC-Cups, 12 cups to prewarm ProCell M and CleanCell M before use
- [REF] 03005712190, ProbeWash M, 12 x 70 mL cleaning solution for run finalization and rinsing during reagent change
- [REF] 03004899190, PreClean M, 5 x 600 mL detection cleaning solution
- [REF] 12102137001, AssayTip/AssayCup, 48 magazines x 84 reaction cups or pipette tips, waste bags
- [REF] 03023150001, WasteLiner, waste bags
- [REF] 03027651001, SysClean Adapter M

Additional materials for all analyzers:





0755992500V4.0

# Elecsys Folate III



| Sex  | Age<br>years | N    | Median |        | 2.5 <sup>th</sup> -97.5 <sup>th</sup> percentile |            |
|------|--------------|------|--------|--------|--------------------------------------------------|------------|
|      |              |      | ng/mL  | nmol/L | ng/mL                                            | nmol/L     |
| Both | ≥ 60         | 4671 | 16.6   | 37.6   | 5.6-45.8                                         | 12.7-103.8 |

These values were obtained in the USA during the National Health and Nutrition Examination Survey (NHANES), 1999-2004.

The values shown below were performed on samples from an apparently healthy population, using the Elecsys Folate III assay.

The calculation is based on 404 sera (177 men, 227 women). The age range was between 20 and 65 years. Pregnant or lactating women were excluded. The reference population was selected according to normal homocysteine values.

| N   | Median |        | 2.5 <sup>th</sup> -97.5 <sup>th</sup> percentile |           |
|-----|--------|--------|--------------------------------------------------|-----------|
|     | ng/mL  | nmol/L | ng/mL                                            | nmol/L    |
| 404 | 8.94   | 20.3   | 3.89-26.8                                        | 8.83-60.8 |

*Please note:* These values should only be used as a guideline.

It should be taken into consideration that differences in the expected values may exist with respect to population and dietary status.

Each laboratory should investigate the transferability of the expected values to its own patient population and if necessary determine its own reference ranges.

### Folate deficient sample values

25 samples considered to be deficient<sup>a)</sup> in serum folate concentration were assessed using the Elecsys Folate III assay. All samples were found to be below the 2.5<sup>th</sup> percentile as given in the table above.

a) Folate deficiency was assessed by measurement of serum folate by two commercially available folate assays.

### Specific performance data

Representative performance data on the analyzers are given below. Results obtained in individual laboratories may differ.

### Precision

Precision was determined using Elecsys reagents, pooled human sera and controls in a protocol (EP5-A2) of the CLSI (Clinical and Laboratory Standards Institute); 2 runs per day in duplicate each for 21 days (n = 84). The following results were obtained:

| cobas e 411 analyzer |      |               |     |                        |      |
|----------------------|------|---------------|-----|------------------------|------|
| Sample               | Mean | Repeatability |     | Intermediate precision |      |
|                      |      | SD            | CV  | SD                     | CV   |
| Human serum 1        | 1.88 | 0.150         | 8.0 | 0.205                  | 10.9 |
| Human serum 2        | 3.92 | 0.200         | 5.1 | 0.318                  | 8.1  |
| Human serum 3        | 11.9 | 0.346         | 2.9 | 0.571                  | 4.8  |
| Human serum 4        | 13.4 | 0.301         | 2.2 | 0.574                  | 4.3  |
| Human serum 5        | 17.8 | 0.440         | 2.5 | 0.666                  | 3.7  |
| PreciControl Varia1  | 3.24 | 0.215         | 6.6 | 0.309                  | 9.5  |
| PreciControl Varia2  | 11.6 | 0.314         | 2.7 | 0.566                  | 4.9  |

| cobas e 411 analyzer |      |               |     |                        |      |
|----------------------|------|---------------|-----|------------------------|------|
| Sample               | Mean | Repeatability |     | Intermediate precision |      |
|                      |      | SD            | CV  | SD                     | CV   |
| Human serum 1        | 4.27 | 0.341         | 8.0 | 0.465                  | 10.9 |
| Human serum 2        | 8.90 | 0.454         | 5.1 | 0.722                  | 8.1  |
| Human serum 3        | 27.0 | 0.785         | 2.9 | 1.30                   | 4.8  |
| Human serum 4        | 30.4 | 0.683         | 2.2 | 1.30                   | 4.3  |

| cobas e 411 analyzer |      |               |     |                        |     |
|----------------------|------|---------------|-----|------------------------|-----|
| Sample               | Mean | Repeatability |     | Intermediate precision |     |
|                      |      | SD            | CV  | SD                     | CV  |
| Human serum 5        | 40.4 | 0.999         | 2.5 | 1.51                   | 3.7 |
| PreciControl Varia1  | 7.35 | 0.488         | 6.6 | 0.701                  | 9.5 |
| PreciControl Varia2  | 26.3 | 0.713         | 2.7 | 1.28                   | 4.9 |

| cobas e 601 and cobas e 602 analyzers |      |               |      |                        |      |
|---------------------------------------|------|---------------|------|------------------------|------|
| Sample                                | Mean | Repeatability |      | Intermediate precision |      |
|                                       |      | SD            | CV   | SD                     | CV   |
| Human serum 1                         | 1.66 | 0.255         | 15.4 | 0.268                  | 16.1 |
| Human serum 2                         | 4.10 | 0.219         | 5.4  | 0.303                  | 7.4  |
| Human serum 3                         | 11.1 | 0.449         | 4.1  | 0.503                  | 4.6  |
| Human serum 4                         | 12.2 | 0.454         | 3.7  | 0.467                  | 3.8  |
| Human serum 5                         | 16.4 | 0.502         | 3.1  | 0.625                  | 3.8  |
| PreciControl Varia1                   | 2.34 | 0.189         | 8.1  | 0.228                  | 9.8  |
| PreciControl Varia2                   | 10.1 | 0.443         | 4.4  | 0.489                  | 4.9  |

| cobas e 601 and cobas e 602 analyzers |      |               |      |                        |      |
|---------------------------------------|------|---------------|------|------------------------|------|
| Sample                                | Mean | Repeatability |      | Intermediate precision |      |
|                                       |      | SD            | CV   | SD                     | CV   |
| Human serum 1                         | 3.77 | 0.579         | 15.4 | 0.608                  | 16.1 |
| Human serum 2                         | 9.31 | 0.497         | 5.4  | 0.688                  | 7.4  |
| Human serum 3                         | 25.2 | 1.02          | 4.1  | 1.14                   | 4.6  |
| Human serum 4                         | 27.7 | 1.03          | 3.7  | 1.06                   | 3.8  |
| Human serum 5                         | 37.2 | 1.14          | 3.1  | 1.42                   | 3.8  |
| PreciControl Varia1                   | 5.31 | 0.429         | 8.1  | 0.518                  | 9.8  |
| PreciControl Varia2                   | 22.9 | 1.01          | 4.4  | 1.11                   | 4.9  |

### Method comparison

a) A comparison of the Elecsys Folate III assay (traceable to WHO IS 03/178; y) and the Elecsys Folate III assay prior to standardization against WHO IS 03/178 (x) using clinical samples gave the following correlations (ng/mL):

Number of samples measured: 113

Passing/Bablok<sup>16</sup> Linear regression

$$y = 1.14x - 1.97$$

$$y = 1.11x - 1.77$$

$$\tau = 0.939$$

$$r = 0.994$$

The sample concentrations were between 2.1 and 18 ng/mL (4.8 and 41 nmol/L).

b) A comparison of the Elecsys Folate III assay (y) with a commercially available method (x) using clinical samples gave the following correlations (ng/mL):

Number of samples measured: 106

Passing/Bablok<sup>16</sup> Linear regression

$$y = 0.980x - 0.095$$

$$y = 1.09x - 0.659$$

$$\tau = 0.924$$

$$r = 0.984$$

The sample concentrations were between 1.9 and 17 ng/mL (4.3 and 39 nmol/L).

07559992500V4.0

# Elecsys Folate III



c) A comparison of the Elecsys Folate III assay on the **cobas e 601** analyzer (y) with the Elecsys Folate III assay on the **cobas e 411** analyzer (x) using clinical samples gave the following correlations (ng/mL):  
Number of samples measured: 105

Passing/Bablok<sup>16</sup>                      Linear regression  
 $y = 1.05x - 0.303$                        $y = 0.981x + 0.143$   
 $T = 0.868$                                    $r = 0.982$

The sample concentrations were between 1.6 and 19 ng/mL (3.6 and 43 nmol/L).

## Analytical specificity

The following cross-reactivities were found, tested with folate concentrations of approximately 3.5 ng/mL, 10 ng/mL and 19 ng/mL.

| Cross-reactant | Concentration tested<br>ng/mL | Cross-reactivity<br>% |
|----------------|-------------------------------|-----------------------|
| Amethopterin   | 750                           | 2.5                   |
| Aminopterin    | 750                           | 4.4                   |
| Folinic acid   | 750                           | 0.7                   |

## References

- Nazki FH, Sameer AS, Ganaie BA. Folate: Metabolism, genes, polymorphisms and the associated diseases. *Gene* 2014;533(1):11-20.
- Scaglione F, Panzavolta G. Folate, folic acid and 5-methyltetrahydrofolate are not the same thing. *Xenobiotica* 2014;44(5):480-488.
- Reynolds EH. The neurology of folic acid deficiency. *Handb Clin Neurol* 2014;120:927-43.
- Wick M, Pinggera W, Lehmann P. *Clinical Aspects and Laboratory. Iron metabolism, Anemias.* Springer Verlag, Wien, New York, 6th edition 2011:41-42.
- Occupational Safety and Health Standards: Bloodborne pathogens. (29 CFR Part 1910.1030). Fed. Register.
- Directive 2000/54/EC of the European Parliament and Council of 18 September 2000 on the protection of workers from risks related to exposure to biological agents at work.
- Wu AHB. *Tietz clinical guide to laboratory tests*, 4th ed. St. Louis, Saunders/Elsevier 2006:608-609, 916-917.
- Paricaud K, Moulis G, Combis MS, et al. Causes of proteinuria above 100 g/L. *Eur J Intern Med* 2014;25:e123.
- Filippatos TD, Liamis G, Christopoulou F, et al. Ten common pitfalls in the evaluation of patients with hyponatremia. *Eur J Intern Med* 2016;29:22-25.
- Mailankody S, Landgren O. Monoclonal gammopathy of undetermined significance and Waldenström's macroglobulinemia. *Best Pract Res Clin Haematol* 2016;29:187-193.
- Morel P, Duhamel A, Gobbi P, et al. International prognostic scoring system for Waldenström macroglobulinemia. *Blood* 2009;113:4163-4170.
- Rajkumar SV. Multiple Myeloma. *Curr Probl Cancer* 2009;33:7-64.
- Gertz MA. Immunoglobulin light chain amyloidosis: 2016 update on diagnosis, prognosis, and treatment. *Am J Hematol* 2016;91:947-956.
- Wu AHB. *Tietz clinical guide to laboratory tests*, 4th ed. St. Louis, Saunders/Elsevier 2006: 916-917, 925.
- Pfeiffer CM, Johnson CL, Jain RB, et al. Trends in blood folate and vitamin B-12 concentrations in the United States, 1988-2004. *Am J Clin Nutr* 2007;86:718-727.
- Bablok W, Passing H, Bender R, et al. A general regression procedure for method transformation. Application of linear regression procedures for method comparison studies in clinical chemistry, Part III. *J Clin Chem Clin Biochem* 1988 Nov;26(11):783-790.

For further information, please refer to the appropriate operator's manual for the analyzer concerned, the respective application sheets, the product information and the Method Sheets of all necessary components (if available in your country).

A point (period/stop) is always used in this Method Sheet as the decimal separator to mark the border between the integral and the fractional parts of a decimal numeral. Separators for thousands are not used.

## Symbols

Roche Diagnostics uses the following symbols and signs in addition to those listed in the ISO 15223-1 standard (for USA: see [dialog.roche.com](http://dialog.roche.com) for definition of symbols used):

|                                                                                   |                                                     |
|-----------------------------------------------------------------------------------|-----------------------------------------------------|
|  | Contents of kit                                     |
|  | Analyzers/Instruments on which reagents can be used |
|  | Reagent                                             |
|  | Calibrator                                          |
|  | Volume after reconstitution or mixing               |
|  | Global Trade Item Number                            |

COBAS, COBAS E, ELECSYS and PRECICONTROL are trademarks of Roche. INTRALIPID is a trademark of Fresenius Kabi AB.

All other product names and trademarks are the property of their respective owners. Additions, deletions or changes are indicated by a change bar in the margin.

© 2019, Roche Diagnostics

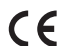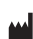

Roche Diagnostics GmbH, Sandhofer Strasse 116, D-68305 Mannheim  
[www.roche.com](http://www.roche.com)

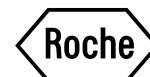



**Annex 2: Nutrition direct and indirect interventions/indicators assessment questionnaire**  
**Nutrition direct and indirect Interventions Questionnaire**

**Module 1: Household identifier, characteristics and socio-demographic status**

| Household identifier and characteristics |                                                                                                                                     |                                                                                                                                                                 |             |             |                 |
|------------------------------------------|-------------------------------------------------------------------------------------------------------------------------------------|-----------------------------------------------------------------------------------------------------------------------------------------------------------------|-------------|-------------|-----------------|
| 101                                      | Region Code                                                                                                                         | _ _ _                                                                                                                                                           |             |             |                 |
| 102                                      | Woreda Code                                                                                                                         | _ _ _                                                                                                                                                           |             |             |                 |
| 103                                      | Kebele Code                                                                                                                         | _ _ _                                                                                                                                                           |             |             |                 |
| 104                                      | Gote Code                                                                                                                           | _ _ _                                                                                                                                                           |             |             |                 |
| 105                                      | Household Code                                                                                                                      | _ _ _                                                                                                                                                           |             |             | GPS Coordinates |
| 106                                      | Unique Household Code                                                                                                               | _ _ _ _                                                                                                                                                         |             |             | _ _ _ _         |
|                                          |                                                                                                                                     | Region Code                                                                                                                                                     | Woreda Code | Kebele Code | EA Code         |
| 107                                      | Residence                                                                                                                           | 1 = Urban<br>2 = Rural                                                                                                                                          |             |             | _               |
| 108                                      | Do you own this house?                                                                                                              | 1 = Yes<br>0 = No                                                                                                                                               |             |             | _               |
| 109                                      | What is the main material of the walls?<br><b>Observe</b>                                                                           | 1 = No walls<br>2 = Natural materials (cane, wood, mud, straw)<br>3 = Stone with mud<br>4 = Stone/bricks with cement<br>99 = Other                              |             |             | _ _ _           |
| 110                                      | What is the main floor material?<br><b>Observe</b>                                                                                  | 1 = Natural floor (earth/sand/dung)<br>2 = Rudimentary floor (wood/palm/bamboo)<br>3 = Finished floor (polished wood/ vinyl/ tiles/cement/carpet)<br>99 = Other |             |             | _ _ _           |
| 111                                      | What is the main material of the roof?<br><b>Observe</b>                                                                            | 1 = Thatch/grass or leaves<br>2 = Iron sheets or tiles<br>99 = Other                                                                                            |             |             | _ _ _           |
| 112                                      | What type of fuel does your household mostly use for cooking?<br><b>Do not read list</b>                                            | 1 = Dung<br>2 = Firewood/straw<br>3 = Charcoal<br>4 = Kerosene<br>5 = Gas (methane/biogas)<br>6 = Electricity<br>99 = Other                                     |             |             | _ _ _           |
| 113                                      | Is the house connected to electricity?                                                                                              | 1 = Yes<br>0 = No                                                                                                                                               |             |             | _               |
| 114                                      | In total, how many of the following items are owned by residents of this household?<br><b>Add the household total for each item</b> | A kerosene lamp/pressure lamp                                                                                                                                   |             |             | _               |
| 115                                      |                                                                                                                                     | Mobile phone                                                                                                                                                    |             |             | _               |
| 116                                      |                                                                                                                                     | Cart                                                                                                                                                            |             |             | _               |
| 117                                      |                                                                                                                                     | Bicycle                                                                                                                                                         |             |             | _               |
| 118                                      |                                                                                                                                     | Motorcycle                                                                                                                                                      |             |             | _               |
| 119                                      |                                                                                                                                     | Radio                                                                                                                                                           |             |             | _               |
| 120                                      | Television                                                                                                                          |                                                                                                                                                                 |             | _           |                 |

|                                                |                                                                                                                                            |                                                                                                                                                               |       |
|------------------------------------------------|--------------------------------------------------------------------------------------------------------------------------------------------|---------------------------------------------------------------------------------------------------------------------------------------------------------------|-------|
| 121                                            |                                                                                                                                            | Car/tractor/Bajaj                                                                                                                                             | _     |
| 122                                            | Does this household own any livestock, herds, other farm animals, or poultry?                                                              | 1 = Yes<br>0 = No ( <b>Go to→131</b> )                                                                                                                        |       |
| 123                                            | In total, how many of the following animals are owned by residents of this household?<br><b>Add the household total for each item</b>      | Milk cows, oxen or bulls?                                                                                                                                     | _     |
| 124                                            |                                                                                                                                            | Other cattle?                                                                                                                                                 | _     |
| 125                                            |                                                                                                                                            | Horses, donkeys, or mules?                                                                                                                                    | _     |
| 126                                            |                                                                                                                                            | Camels                                                                                                                                                        | _     |
| 127                                            |                                                                                                                                            | Goats?                                                                                                                                                        | _     |
| 128                                            |                                                                                                                                            | Sheep?                                                                                                                                                        | _     |
| 129                                            |                                                                                                                                            | Chickens or other poultry?                                                                                                                                    | _     |
| 130                                            |                                                                                                                                            | Beehives?                                                                                                                                                     | _     |
| 131                                            | Does any member of this household own any agricultural land?                                                                               | 1 = Yes<br>0 = No                                                                                                                                             | _     |
| 132                                            | How often does anyone smoke inside your house?<br><br><i>Would you say daily, weekly, monthly, less often than once a month, or never?</i> | 1 = Daily<br>2 = Weekly<br>3 = Monthly<br>4 = Less once monthly<br>5 = Never                                                                                  | _     |
| <b>Household head socio-demographic status</b> |                                                                                                                                            |                                                                                                                                                               |       |
| 133                                            | Age in years                                                                                                                               |                                                                                                                                                               | _ _ _ |
| 134                                            | Marital status                                                                                                                             | 1. Single<br>2. Married<br>3. Divorced<br>4. Separated<br>5. Widowed                                                                                          | _     |
| 135                                            | What is the highest level of school the head of the household completed?                                                                   | 1. None<br>2. Primary<br>3. Secondary<br>4. Technical/vocational certificate<br>5. Higher / university/ college<br>98. Don't know<br>99. Other (specify)_____ | _ _ _ |
| 136                                            | What is the religion of the head of the HH?                                                                                                | 1. Orthodox<br>2. Protestant<br>3. Catholic/ other Christian<br>4. Muslim<br>5. No religion<br>98. Don't know<br>99. Other religion (specify)_____            | _ _ _ |
| 137                                            | Ethnicity                                                                                                                                  | Specify                                                                                                                                                       |       |

**Module 2: Child health**

Now I would like to ask some questions about the health of your children born in the last 5 years. We will talk about each separately, starting with the youngest.

|     |                                                                                 |                                                                                                                                                         |       |
|-----|---------------------------------------------------------------------------------|---------------------------------------------------------------------------------------------------------------------------------------------------------|-------|
| 201 | Child's code                                                                    |                                                                                                                                                         | _ _ _ |
| 202 | Mother's name                                                                   | Mother's given name                                                                                                                                     |       |
| 203 | Mother's age                                                                    |                                                                                                                                                         |       |
| 204 | Mother's education level                                                        | 1=None<br>2=Primary<br>3=Secondary<br>4=Technical/vocational certificate<br>5=Higher / university/ college<br>98=Don't know<br>99. Other (specify)_____ |       |
| 205 | Mother's marital status                                                         | 1=Single<br>2 =Married<br>3=Divorced<br>4 =Separated<br>5=Widowed                                                                                       |       |
| 206 | Mother's religion                                                               | 1=Orthodox<br>2=Protestant<br>3=Catholic/ other Christian<br>4=Muslim<br>5=No religion<br>98=Don't know<br>99=Other religion (specify)_____             |       |
| 207 | Mother's ethnicity                                                              | Specify                                                                                                                                                 |       |
| 208 | Child's name                                                                    | Child's given name                                                                                                                                      |       |
| 209 | Child (NAME) sex                                                                | 1 = Boy<br>2 = Girl                                                                                                                                     | _     |
| 210 | Child (NAME) age?                                                               | Age in months or age at the time of the child's death                                                                                                   | _ _ _ |
| 211 | In the last six months, was (NAME) given any vitamin A supplement?              | 1 = Yes<br>0 = No<br>98 = Don't know                                                                                                                    | _ _ _ |
| 212 | When was the child (NAME) given the vitamin A supplement?                       | Specify                                                                                                                                                 |       |
| 213 | In the last 12 months, was (NAME) given any iron tablet or syrup or supplement? | 1 = Yes<br>0 = No<br>98 = Don't know                                                                                                                    | _ _ _ |
| 214 | In the last 6 months, was (name) given any medicine for intestinal worms?       | 1 = Yes<br>0 = No<br>98 = Don't know                                                                                                                    | _ _ _ |
| 215 | In the last 3 months, has any healthcare provider measured?                     | 1 = Yes, 0 = No, 98 = Don't know                                                                                                                        |       |
|     |                                                                                 | Weight                                                                                                                                                  | _ _ _ |
|     |                                                                                 | Height/length                                                                                                                                           | _ _ _ |
|     |                                                                                 | MUAC                                                                                                                                                    | _ _ _ |
| 216 | Has (name) had diarrhea in the last 2 weeks?                                    | 1 = Yes<br>0 = No ( <b>Go to 224</b> )                                                                                                                  | _ _ _ |

|     |                                                                                                                                                                                                                             |                                                                                                                                                                                                                                                                                                                                                                                                                                                                                                                                                                                                          |       |
|-----|-----------------------------------------------------------------------------------------------------------------------------------------------------------------------------------------------------------------------------|----------------------------------------------------------------------------------------------------------------------------------------------------------------------------------------------------------------------------------------------------------------------------------------------------------------------------------------------------------------------------------------------------------------------------------------------------------------------------------------------------------------------------------------------------------------------------------------------------------|-------|
|     |                                                                                                                                                                                                                             | 98 = Don't know                                                                                                                                                                                                                                                                                                                                                                                                                                                                                                                                                                                          |       |
| 217 | Now I would like to know how much was the child given to drink during diarrhea, including breast milk. Was the child given less than usual to drink, about the same amount, or more than usual to drink?                    | 1 = Much less<br>2 = Somewhat less<br>3 = About the same<br>4 = More<br>5 = Nothing to drink<br>98 = Don't know                                                                                                                                                                                                                                                                                                                                                                                                                                                                                          | _     |
| 218 | When the child had diarrhea, was he/she given less than usual to eat, about the same amount, more than usual, or nothing to eat?                                                                                            | 1 = Much less<br>2 = Somewhat less<br>3 = About the same<br>4 = More<br>5 = Nothing to drink<br>98 = Don't know                                                                                                                                                                                                                                                                                                                                                                                                                                                                                          | _     |
| 219 | Did you seek advice or treatment for the diarrhea from any source?                                                                                                                                                          | 1 = Yes<br>0 = No ( <b>Go to 221</b> )                                                                                                                                                                                                                                                                                                                                                                                                                                                                                                                                                                   | _     |
| 220 | Where did you seek advice or treatment?<br>Anywhere else?<br><br><i>Probe to identify the type of source.<br/>If unable to determine if public, private, or NGO sector, record '21' and write the name of the place(s).</i> | 1= Government hospital<br>2= Government health center<br>3= Government health post<br>4 = Mobile clinic<br>5 = Community health worker/fieldworker<br>6 = Other public sector (specify)<br>7 = Private hospital<br>8 = Private clinic<br>9 = Pharmacy<br>10 = Private doctor<br>11 = Mobile clinic<br>12 = Community health worker/fieldworker<br>13 = Other private medical sector (specify)<br>14 = NGO hospital<br>15 = NGO clinic<br>16 = Other NGO medical sector (specify)<br>17 = Shop<br>18 = Traditional practitioner<br>19 = Market<br>20 = Itinerant drug seller<br>99 = Other (specify)_____ | _ _ _ |
|     | Was (name) given any of the following at any time since (name) started having diarrhea:                                                                                                                                     | 1 = Yes, 0 = No, 98 = Don't know                                                                                                                                                                                                                                                                                                                                                                                                                                                                                                                                                                         |       |
| 221 |                                                                                                                                                                                                                             | Fluid from ORS packet                                                                                                                                                                                                                                                                                                                                                                                                                                                                                                                                                                                    | _ _ _ |
| 222 |                                                                                                                                                                                                                             | Zinc                                                                                                                                                                                                                                                                                                                                                                                                                                                                                                                                                                                                     | _ _ _ |
| 223 |                                                                                                                                                                                                                             | Homemade fluid                                                                                                                                                                                                                                                                                                                                                                                                                                                                                                                                                                                           | _ _ _ |
| 224 | Has (name) been ill with a fever at any time in the last 2 weeks?                                                                                                                                                           | 1 = Yes<br>0 = No ( <b>Go to 226</b> )<br>98 = Don't know                                                                                                                                                                                                                                                                                                                                                                                                                                                                                                                                                | _ _ _ |
| 225 | Where did you seek advice or treatment for                                                                                                                                                                                  | 1= Government hospital                                                                                                                                                                                                                                                                                                                                                                                                                                                                                                                                                                                   |       |

|                                                                                                                                                             |                                                                                                                                                                                                    |                                                                                                                                                                                                                                                                                                                                                                                                                                                                                                                                                                                             |                                     |       |
|-------------------------------------------------------------------------------------------------------------------------------------------------------------|----------------------------------------------------------------------------------------------------------------------------------------------------------------------------------------------------|---------------------------------------------------------------------------------------------------------------------------------------------------------------------------------------------------------------------------------------------------------------------------------------------------------------------------------------------------------------------------------------------------------------------------------------------------------------------------------------------------------------------------------------------------------------------------------------------|-------------------------------------|-------|
| 1<br>2<br>3<br>4<br>5<br>6<br>7<br>8<br>9<br>10<br>11<br>12<br>13<br>14<br>15<br>16<br>17<br>18<br>19<br>20<br>21<br>22<br>23<br>24<br>25<br>26<br>27<br>28 | fever?<br>Anywhere else?<br><br><i>Probe to identify the type of source.<br/>If unable to determine if public, private, or<br/>NGO sector, record '21' and write the name<br/>Of the place(s).</i> | 2= Government health center<br>3= Government health post<br>4 = Mobile clinic<br>5 = Community health worker/<br>fieldworker<br>6 = Other public sector (specify)<br>7 = Private hospital<br>8 = Private clinic<br>9 = Pharmacy<br>10 = Private doctor<br>11 = Mobile clinic<br>12 = Community health<br>worker/fieldworker<br>13 = Other private medical sector<br>(specify)<br>14 = NGO hospital<br>15 = NGO clinic<br>16 = Other NGO medical sector<br>(specify)<br>17 = Shop<br>18 = Traditional practitioner<br>19 = Market<br>20 = Itinerant drug seller<br>99 = Other (specify)_____ | _ _ _                               |       |
| 29<br>30<br>31<br>32                                                                                                                                        | 226                                                                                                                                                                                                | Was Child (Name) ever breastfed?                                                                                                                                                                                                                                                                                                                                                                                                                                                                                                                                                            | 1 = Yes<br>0 = No ( <b>Go 228</b> ) | _     |
| 33<br>34                                                                                                                                                    | 227                                                                                                                                                                                                | How many months the child (NAME) was breastfed?                                                                                                                                                                                                                                                                                                                                                                                                                                                                                                                                             |                                     | _     |
| 35<br>36<br>37<br>38<br>39<br>40<br>41<br>42                                                                                                                | <b>Anthropometric and clinical nutrition assessment</b>                                                                                                                                            |                                                                                                                                                                                                                                                                                                                                                                                                                                                                                                                                                                                             |                                     |       |
|                                                                                                                                                             | 228                                                                                                                                                                                                | Weight                                                                                                                                                                                                                                                                                                                                                                                                                                                                                                                                                                                      |                                     | _ _ _ |
|                                                                                                                                                             | 229                                                                                                                                                                                                | Height/length                                                                                                                                                                                                                                                                                                                                                                                                                                                                                                                                                                               |                                     | _ _ _ |
|                                                                                                                                                             | 230                                                                                                                                                                                                | MUAC                                                                                                                                                                                                                                                                                                                                                                                                                                                                                                                                                                                        |                                     | _ _ _ |
|                                                                                                                                                             | 231                                                                                                                                                                                                | Presence of bilateral oedema for children 6-59 months                                                                                                                                                                                                                                                                                                                                                                                                                                                                                                                                       | 1 = Yes<br>0 = No                   | _     |
|                                                                                                                                                             | 232                                                                                                                                                                                                | Bitot spot                                                                                                                                                                                                                                                                                                                                                                                                                                                                                                                                                                                  | 1 = Yes<br>0 = No                   |       |



**Module 3: Infant and young child feeding practices****For children 0-23 months**

This module is to be administered to the mother/caregiver of children born 0-23 months before the survey living with respondents. Verify that the respondent you are speaking to is the mother/caregiver of the child.

|     |                                                                                                                                                                                                                                                                                                                                                                                                                                                                            |                                                                                                                                         |       |
|-----|----------------------------------------------------------------------------------------------------------------------------------------------------------------------------------------------------------------------------------------------------------------------------------------------------------------------------------------------------------------------------------------------------------------------------------------------------------------------------|-----------------------------------------------------------------------------------------------------------------------------------------|-------|
| 301 | Was Child (Name) ever breastfed?                                                                                                                                                                                                                                                                                                                                                                                                                                           | 1 = Yes<br>0 = No ( <b>Go to 304</b> )<br>98 = Don't know                                                                               | _ _ _ |
| 302 | Was Child (NAME) given the first milk (colostrum) after birth?                                                                                                                                                                                                                                                                                                                                                                                                             | 1 = Yes<br>0 = No<br>98 = Don't know                                                                                                    | _ _ _ |
| 303 | How long after birth did you first put (NAME) to the breast, even if your breast milk did not arrive?                                                                                                                                                                                                                                                                                                                                                                      | 1 = Immediately after birth, or within 1 hour<br>2 = Between 1 and 24 hours<br>3 = More than 24 hours after delivery<br>98 = Don't know | _ _ _ |
| 304 | Child (NAME) alive now?                                                                                                                                                                                                                                                                                                                                                                                                                                                    | 1 = Yes<br>0 = No ( <b>Go to 401</b> )                                                                                                  | _ _ _ |
| 305 | Was (NAME) breastfed yesterday from sunrise until today sunrise?<br>NB: Breastfeeding could be by the mother herself or by wet mother.                                                                                                                                                                                                                                                                                                                                     | 1 = Yes<br>0 = No ( <b>Go to 307</b> )<br>98 = Don't know                                                                               | _ _ _ |
| 306 | <i>Sometimes babies are fed breast milk in different ways, for example by spoon, cup or bottle. This can happen when the mother cannot always be with her baby. Sometimes babies are breastfed by another woman, or given breast milk from another woman by spoon, cup or bottle or some other way. This can happen if a mother cannot breastfeed her own baby.</i><br><br>Did (NAME) consume breast milk in any of these ways yesterday from sunrise until today sunrise? | 1 = Yes<br>0 = No<br>98 = Don't know                                                                                                    | _ _ _ |
| 307 | Now I would like to ask you about some medicines and vitamins that are sometimes given to infants.<br><br>Was (NAME) given any vitamin drops or other medicines as drops yesterday from sunrise until today sunrise?                                                                                                                                                                                                                                                       | 1 = Yes<br>0 = No<br>98 = Don't know                                                                                                    | _ _ _ |
| 308 | Was (NAME) given Lemlem or ORS in the last two weeks?                                                                                                                                                                                                                                                                                                                                                                                                                      | 1 = Yes<br>0 = No<br>98 = Don't know                                                                                                    | _ _ _ |

|                                                                                                                                                                                                                                                                                                                                                                                                                                                                                                                                                                                                                         |                                                                                                                                                                                                          |                                                                                                    |                   |
|-------------------------------------------------------------------------------------------------------------------------------------------------------------------------------------------------------------------------------------------------------------------------------------------------------------------------------------------------------------------------------------------------------------------------------------------------------------------------------------------------------------------------------------------------------------------------------------------------------------------------|----------------------------------------------------------------------------------------------------------------------------------------------------------------------------------------------------------|----------------------------------------------------------------------------------------------------|-------------------|
| 309                                                                                                                                                                                                                                                                                                                                                                                                                                                                                                                                                                                                                     | In the last 6 months, did any healthcare provider or community health worker talk with you about how and what to feed your child?                                                                        | 1 = Yes<br>0 = No<br>98 = Don't know                                                               | _ _ _             |
| 310                                                                                                                                                                                                                                                                                                                                                                                                                                                                                                                                                                                                                     | Now, I would like to ask you about some liquids that (NAME) may have had yesterday from sunrise until today sunrise?<br><br><b>If yes to Q310, read the list of liquids starting with 'plain water'.</b> | Did (NAME) have any (item from list)?<br>1 = Yes<br>0 = No ( <b>Go to 321</b> )<br>98 = Don't know | _ _ _             |
| 311                                                                                                                                                                                                                                                                                                                                                                                                                                                                                                                                                                                                                     | Plain water                                                                                                                                                                                              | 1 = Yes<br>0 = No<br>98 = Don't know                                                               | _ _ _             |
| 312                                                                                                                                                                                                                                                                                                                                                                                                                                                                                                                                                                                                                     | Infant formula such as S-26?                                                                                                                                                                             | 1 = Yes<br>0 = No ( <b>Go to 314</b> )<br>98 = Don't know                                          | _ _ _             |
| 313                                                                                                                                                                                                                                                                                                                                                                                                                                                                                                                                                                                                                     | How many times infant formula such as S-26?                                                                                                                                                              |                                                                                                    | _ _ _             |
| 314                                                                                                                                                                                                                                                                                                                                                                                                                                                                                                                                                                                                                     | Milk such as tinned, powdered, or fresh animal milk?                                                                                                                                                     | 1 = Yes<br>0 = No ( <b>Go to 316</b> )<br>98 = Don't know                                          | _ _ _             |
| 315                                                                                                                                                                                                                                                                                                                                                                                                                                                                                                                                                                                                                     | How many times milk drink?                                                                                                                                                                               |                                                                                                    | _ _ _             |
| 316                                                                                                                                                                                                                                                                                                                                                                                                                                                                                                                                                                                                                     | Yogurt drink?                                                                                                                                                                                            | 1 = Yes<br>0 = No<br>98 = Don't know                                                               | _ _ _             |
| 317                                                                                                                                                                                                                                                                                                                                                                                                                                                                                                                                                                                                                     | Chocolate flavored drink?                                                                                                                                                                                | 1 = Yes<br>0 = No<br>98 = Don't know                                                               | _ _ _             |
| 318                                                                                                                                                                                                                                                                                                                                                                                                                                                                                                                                                                                                                     | Sodas, malt drinks or energy drinks?                                                                                                                                                                     | 1 = Yes<br>0 = No<br>98 = Don't know                                                               | _ _ _             |
| 319                                                                                                                                                                                                                                                                                                                                                                                                                                                                                                                                                                                                                     | Clear broth or clear soup?                                                                                                                                                                               | 1 = Yes<br>0 = No<br>98 = Don't know                                                               | _ _ _             |
| 320                                                                                                                                                                                                                                                                                                                                                                                                                                                                                                                                                                                                                     | Any other liquids?                                                                                                                                                                                       | 1 = Yes<br>0 = No<br>98 = Don't know                                                               | _ _ _             |
| <p>Now I would like to ask you about foods that (NAME) had yesterday during the day or night. I am interested in foods your child ate whether at home or somewhere else. I will ask you about different types of foods, and I would like to know whether your child ate the food even if it was combined with other foods. Please do not answer 'yes' for any food or ingredient used in a small amount to add flavor to a dish.</p> <p>OTHER FOODS: Please write down other foods in this box that respondent mentioned but are not in the list below</p> <p>Yesterday during the day or at night, did (NAME) eat:</p> |                                                                                                                                                                                                          |                                                                                                    |                   |
| 321                                                                                                                                                                                                                                                                                                                                                                                                                                                                                                                                                                                                                     | Did the child ate any solid or semi-solid food yesterday?                                                                                                                                                |                                                                                                    | Eaten?<br>1 = Yes |

|     |                                                                                                                            |                                                 | 0 = No ( <b>Go to 342</b> )<br>98 = Don't know |
|-----|----------------------------------------------------------------------------------------------------------------------------|-------------------------------------------------|------------------------------------------------|
| 322 | Yogurt, other than yogurt drink?                                                                                           |                                                 | __                                             |
| 323 | How many times did child (NAME) eat yogurt?                                                                                |                                                 | __                                             |
| 324 | Injera, bread, rice, noodles, pasta, macaroni, porridge, or other foods made from grains such as tef, oats, maize, barley? |                                                 | __                                             |
| 325 | Any commercially fortified baby food like Fafa, Hilina, Cerilak, Cerifam, Mother Choice?                                   |                                                 |                                                |
| 326 | Pumpkin, carrots, squash, or sweet potatoes that are yellow or orange inside?                                              |                                                 | __                                             |
| 327 | White potatoes, white yams, bulla, kocho, manioc, cassava or any other foods made from roots?                              |                                                 | __                                             |
| 328 | Any dark green leafy vegetables (kale, dark green lettuce, moringa ...)?                                                   |                                                 | __                                             |
| 329 | Any other vegetable?                                                                                                       |                                                 |                                                |
| 330 | Ripe mangoes, ripe papayas (insert other local vitamin a-rich fruits)?                                                     |                                                 | __                                             |
| 331 | Any other fruit?                                                                                                           |                                                 | __                                             |
| 332 | Liver, kidney, heart, or other organ meats?                                                                                |                                                 | __                                             |
| 333 | Any meat, such as beef, pork, lamb, goat, chicken?                                                                         |                                                 | __                                             |
| 334 | Egg?                                                                                                                       |                                                 | __                                             |
| 335 | Fresh or dried fish, shellfish, or seafood?                                                                                |                                                 | __                                             |
| 336 | Any foods made from beans, peas, lentils, nuts, or seeds?                                                                  |                                                 | __                                             |
| 337 | Cheese or other food made from milk?                                                                                       |                                                 | __                                             |
| 338 | Any sugary foods such as chocolates, sweets, candies, pastries, cakes, or biscuits                                         |                                                 | __                                             |
| 339 | Any savory junk foods, such as crisps/chips/salted biscuits/instant noodles?                                               |                                                 | __                                             |
| 340 | Any other solid, semi-solid, or soft food?                                                                                 |                                                 | __                                             |
| 341 | How many times did (NAME) eat solid, semi-solid, or soft foods other than liquids yesterday during the day or at night?    | Fill in the number of times.<br>98 = Don't know | _ _ _                                          |
| 342 | Did (NAME) drink anything from a bottle with a nipple yesterday during the day or night?                                   | 1 = Yes<br>0 = No<br>98 = Don't know            | _ _ _                                          |

**Module 4: KAP of mothers or caregivers on children's care and feeding**

| I am going to read you some knowledge questions about breastfeeding. Please tell me your answers on these questions. |                                                                                                                                       |                                                                                                                                                                                                                        |       |
|----------------------------------------------------------------------------------------------------------------------|---------------------------------------------------------------------------------------------------------------------------------------|------------------------------------------------------------------------------------------------------------------------------------------------------------------------------------------------------------------------|-------|
| 401                                                                                                                  | How long after birth should a baby start breastfeeding?                                                                               | 1 = Immediately, within 1 hour of delivery<br>2 = Some hours later but within 24 hours<br>3 = After 1 day<br>4 = After 2 days<br>5 = After >3 days<br>6 = Does not think a baby should be breastfed<br>98 = Don't know | _ _ _ |
| 402                                                                                                                  | How long should a baby receive nothing other than breast milk?                                                                        | 1 = From birth to six months<br>2 = Other<br>98 = Don't know                                                                                                                                                           | _ _ _ |
| 403                                                                                                                  | How often should a baby younger than six months be breastfed or fed with breast milk?                                                 | 1 = On-demand, whenever the baby wants<br>2 = Other<br>98 = Don't know                                                                                                                                                 | _ _ _ |
| 404                                                                                                                  | How much should a child be fed when he/she is sick?                                                                                   | 1 = Less frequent than usual<br>2 = Same as usual<br>3 = More than usual<br>98 = Don't know                                                                                                                            | _ _ _ |
| 405                                                                                                                  | How often should a child be fed when he/she is sick?                                                                                  | 1 = Less frequently than usual<br>2 = Same as usual<br>3 = More frequently than usual<br>98 = Don't know                                                                                                               | _ _ _ |
| 406                                                                                                                  | At what age should a baby first start to receive foods in addition to breast milk?                                                    | Months of age (Specify)<br>98= Don't know                                                                                                                                                                              | _ _ _ |
| 407                                                                                                                  | At what age should children begin observing fasting days if that is their culture or religion?<br>(If <2 years, enter age in months.) | Years of age (Specify)<br>98=Don't know/remember                                                                                                                                                                       | _ _ _ |
| 408                                                                                                                  | Have you ever heard of child stunting?                                                                                                | 1 = Yes<br>0 = No<br>98 = Don't know                                                                                                                                                                                   | _ _ _ |
| 409                                                                                                                  | What age are children at the highest risk of becoming stunted?                                                                        | Years of age (Specify)<br>Months of age (Specify)<br>98 = Don't know/remember                                                                                                                                          | _ _ _ |
| 410                                                                                                                  | What are the consequences of stunting for young children?<br>Mark all that are mentioned by the respondent                            | 1 = Higher risk of severe infectious diseases<br>2 = Poor educational performance<br>3 = Weaker immune system<br>4 = Low adult wages<br>5 = Lost productivity<br>6 = Excessive weight gain in later life               | _ _ _ |

|                                                                                                                                                                                                                                                                              |                                                                                                                          |                                                                                                                                        |       |
|------------------------------------------------------------------------------------------------------------------------------------------------------------------------------------------------------------------------------------------------------------------------------|--------------------------------------------------------------------------------------------------------------------------|----------------------------------------------------------------------------------------------------------------------------------------|-------|
|                                                                                                                                                                                                                                                                              |                                                                                                                          | 7 = Increased risk of nutrition-related chronic diseases in adult life<br>8 = Increased mortality rate<br>98= Don't know<br>99 = Other |       |
| 411                                                                                                                                                                                                                                                                          | Poor diet during pregnancy and the first two years of child age can cause child stunting                                 | 1 = Agree<br>2 = Do not agree<br>98 = Don't know                                                                                       | _ _ _ |
| I am going to read you some statements about breastfeeding and complementary feeding made by other mothers who live in a community like yours. Please tell me if you agree with these statements. Remember, there are no correct answers! I would like to know your opinion. |                                                                                                                          |                                                                                                                                        |       |
| 412                                                                                                                                                                                                                                                                          | The colostrum (the "first yellowish milk") is not good for the baby and should be discarded                              | 1 = Strongly disagree<br>2 = Disagree<br>3 = Agree somewhat<br>4 = Agree<br>5 = Strongly agree<br>98 = Don't know                      | _ _ _ |
| 413                                                                                                                                                                                                                                                                          | It is good to exclusively breastfeed give a baby only breast milk and no other foods or liquids for the first six months | 1 = Strongly disagree<br>2 = Disagree<br>3 = Agree somewhat<br>4 = Agree<br>5 = Strongly agree<br>98 = Don't know                      | _ _ _ |
| 414                                                                                                                                                                                                                                                                          | If a child is sick (for example has fever/diarrhea) breastfeeding must be continued                                      | 1 = Strongly disagree<br>2 = Disagree<br>3 = Agree somewhat<br>4 = Agree<br>5 = Strongly agree<br>98 = Don't know                      | _ _ _ |
| 415                                                                                                                                                                                                                                                                          | A child should eat eggs, cow milk, or meat even on fasting days                                                          | 1 = Strongly disagree<br>2 = Disagree<br>3 = Agree somewhat<br>4 = Agree<br>5 = Strongly agree<br>98 = Don't know                      | _ _ _ |
| 416                                                                                                                                                                                                                                                                          | Eating a meal from different food groups is not necessary until children are old enough to go to school                  | 1 = Strongly disagree<br>2 = Disagree<br>3 = Agree somewhat<br>4 = Agree<br>5 = Strongly agree<br>98 = Don't know                      | _ _ _ |
| 417                                                                                                                                                                                                                                                                          | It is good to feed a two years child at least four times each day                                                        | 1 = Strongly disagree<br>2 = Disagree<br>3 = Agree somewhat<br>4 = Agree<br>5 = Strongly agree<br>98 = Don't know                      | _ _ _ |
| 418                                                                                                                                                                                                                                                                          | A mother should eat nutritious food                                                                                      | 1 = Strongly disagree                                                                                                                  | _ _ _ |

|     |                                                               |                                                                                                                   |       |
|-----|---------------------------------------------------------------|-------------------------------------------------------------------------------------------------------------------|-------|
|     | (four) times daily from the time of pregnancy                 | 2 = Disagree<br>3 = Agree somewhat<br>4 = Agree<br>5 = Strongly agree<br>98 = Don't know                          |       |
| 419 | A mother should take iron folic acid tablets during pregnancy | 1 = Strongly disagree<br>2 = Disagree<br>3 = Agree somewhat<br>4 = Agree<br>5 = Strongly agree<br>98 = Don't know | _ _ _ |
| 420 | A mother should take iodized salt during pregnancy            | 1 = Strongly disagree<br>2 = Disagree<br>3 = Agree somewhat<br>4 = Agree<br>5 = Strongly agree<br>98 = Don't know | _ _ _ |
| 421 | A mother should take de-worming medicines during pregnancy    | 1 = Strongly disagree<br>2 = Disagree<br>3 = Agree somewhat<br>4 = Agree<br>5 = Strongly agree<br>98 = Don't know | _ _ _ |

### Module 5: Adolescent girls (10-19 Years)

|                                                                                                                                                                                                                                                    |                                                                                                                    |                                                                                                                                     |       |
|----------------------------------------------------------------------------------------------------------------------------------------------------------------------------------------------------------------------------------------------------|--------------------------------------------------------------------------------------------------------------------|-------------------------------------------------------------------------------------------------------------------------------------|-------|
| Hint; This section is administered for Adolescent girls 10-19 years old. Provide a paper copy of both the informed consent and Assent Form to the respondent Read the consent (for mothers of adolescent girls) and Assent (adolescent girls) form |                                                                                                                    |                                                                                                                                     |       |
| 501                                                                                                                                                                                                                                                | Girl's code                                                                                                        |                                                                                                                                     | _ _ _ |
| 502                                                                                                                                                                                                                                                | Girl's name                                                                                                        | Given name                                                                                                                          |       |
| 503                                                                                                                                                                                                                                                | Girl's age                                                                                                         |                                                                                                                                     |       |
| 504                                                                                                                                                                                                                                                | Girl's education level                                                                                             | 1=None<br>1=Primary<br>2=Secondary<br>3=Technical/vocational certificate<br>98=Don't know<br>99=Other (specify)                     |       |
| 505                                                                                                                                                                                                                                                | Girl's marital status                                                                                              | 1 = Single<br>2 = Married<br>3 = Divorced<br>4 = Separated<br>5 = Widowed                                                           |       |
| 506                                                                                                                                                                                                                                                | Girl's religion                                                                                                    | 1=Orthodox<br>2=Protestant<br>3=Catholic/ other Christian<br>4=Muslim<br>5=No religion<br>98=Don't know<br>Other religion (specify) |       |
| 507                                                                                                                                                                                                                                                | Girl's ethnicity                                                                                                   | specify                                                                                                                             |       |
| 508                                                                                                                                                                                                                                                | Are you currently a student                                                                                        | 1 = Yes<br>0 = No                                                                                                                   | _     |
| 509                                                                                                                                                                                                                                                | Were you given any iron/folate tablets at school or out of school? ( <i>show the tablet</i> )                      | 1 = Yes<br>0 = No ( <b>Go to 511</b> )                                                                                              | _     |
| 510                                                                                                                                                                                                                                                | How many weeks per month have you taken the iron tablets?                                                          | Weeks per month (specify)<br>98 = don't know                                                                                        | _ _ _ |
| 511                                                                                                                                                                                                                                                | Were you given any drug for intestinal worms at school or out of school in the last six months?                    | 1 = Yes<br>0 = No                                                                                                                   | _     |
| 512                                                                                                                                                                                                                                                | Have you received any nutrition counseling in the last six months?                                                 | 1 = Yes<br>0 = No                                                                                                                   | _     |
| 513                                                                                                                                                                                                                                                | Did you receive nutritional assessment services in health facilities when you went for any kind of health service? | 1 = Yes<br>0 = No                                                                                                                   | _     |
| 514                                                                                                                                                                                                                                                | Is there any food taboo for adolescent girls in your community?                                                    | 1 = Yes<br>0 = No ( <b>Go to 516</b> )                                                                                              | _     |
| 515                                                                                                                                                                                                                                                | Mention types of food taboo?                                                                                       |                                                                                                                                     |       |
| Anthropometry and clinical nutrition assessment                                                                                                                                                                                                    |                                                                                                                    |                                                                                                                                     |       |
| 516                                                                                                                                                                                                                                                | Weight (in kg)                                                                                                     |                                                                                                                                     |       |
| 517                                                                                                                                                                                                                                                | Height (in CM)                                                                                                     |                                                                                                                                     |       |
| 518                                                                                                                                                                                                                                                | Waist circumference (in CM)                                                                                        |                                                                                                                                     |       |

|     |        |                 |
|-----|--------|-----------------|
| 519 | Goiter | 1 = Yes, 0 = No |
|-----|--------|-----------------|

For peer review only



## Module 6: Reproductive age women (15-49 Years)

| For currently pregnant women |                                                                                              |                                                                                                                                                                                                 |       |
|------------------------------|----------------------------------------------------------------------------------------------|-------------------------------------------------------------------------------------------------------------------------------------------------------------------------------------------------|-------|
| 601                          | Woman's code                                                                                 |                                                                                                                                                                                                 |       |
| 602                          | Woman's name                                                                                 | Given name                                                                                                                                                                                      |       |
| 603                          | Woman's age                                                                                  |                                                                                                                                                                                                 |       |
| 604                          | Woman's education level                                                                      | 1=None<br>2=Primary<br>3=Secondary<br>4=Technical/vocational certificate<br>5=Higher / university/ college<br>98=Don't know<br>99=Other (specify)                                               |       |
| 605                          | Woman's marital status                                                                       | 1 = Single<br>2 = Married<br>3 = Divorced<br>4 = Separated<br>5 = Widowed                                                                                                                       |       |
| 606                          | Woman's religion                                                                             | 1=Orthodox<br>2=Protestant<br>3=Catholic/ other Christian<br>4=Muslim<br>5=No religion<br>98=Don't know<br>99=Other religion (specify)                                                          |       |
| 607                          | Woman's ethnicity                                                                            | Specify                                                                                                                                                                                         |       |
| 608                          | What was your age at first marriage                                                          | Year (specify)<br>96=Not applicable<br>98=Don't know                                                                                                                                            | _ _ _ |
| 609                          | What was your age at your first pregnancy                                                    | Year (specify)<br>96=Not applicable<br>98=Don't know                                                                                                                                            | _ _ _ |
| 610                          | Were you pregnant in the last 3 years?                                                       | 1= Yes<br>0=No ( <b>Go to 629</b> )                                                                                                                                                             |       |
| 611                          | Did you see anyone for antenatal care for the pregnancy?                                     | 1 = Yes<br>0 = No ( <b>Go to 629</b> )                                                                                                                                                          | _     |
| 612                          | Whom did you see for antenatal care?<br>Probe to identify each type of person and record all | 1=Health personnel<br>2 = Doctor<br>3 = Nurse<br>4 = Midwife<br>5= Health officer<br>6 = Health extension worker<br>7 = Other person<br>8 = Traditional birth Attendant<br>99 = Other (specify) | _ _ _ |
| 613                          | Where did you receive antenatal care for this pregnancy?<br>Anywhere else?                   | 1= My home<br>2 = Her home<br>3 = Other home<br>4 = Health center                                                                                                                               | _ _ _ |

|     |                                                                                                                                                         |                                                                                                                                                                                                                                 |       |
|-----|---------------------------------------------------------------------------------------------------------------------------------------------------------|---------------------------------------------------------------------------------------------------------------------------------------------------------------------------------------------------------------------------------|-------|
|     |                                                                                                                                                         | 5 = Government Hospital<br>6 = Private Clinic or Hospital<br>7 = Health post<br>8 = NGO clinic or hospital<br>99 = Other SPECIFY                                                                                                |       |
| 614 | How many months pregnant were you when you first received antenatal care for this pregnancy?                                                            | Months (Specify)<br>98 = Don't know                                                                                                                                                                                             | _ _ _ |
| 615 | How many times did you receive antenatal care during this pregnancy?                                                                                    | Number of times (specify)<br>98 = Don't know                                                                                                                                                                                    | _ _ _ |
| 616 | As part of your antenatal care during this pregnancy, were any of the following done at least once:                                                     | 1 = Yes 0 = No                                                                                                                                                                                                                  |       |
|     |                                                                                                                                                         | Was your blood pressure measured?                                                                                                                                                                                               | _     |
|     |                                                                                                                                                         | Did you give a urine sample?                                                                                                                                                                                                    | _     |
|     |                                                                                                                                                         | Did you give a blood sample?                                                                                                                                                                                                    | _     |
|     |                                                                                                                                                         | Did a health care provider talk with you about which foods to eat while pregnant?                                                                                                                                               | _     |
|     |                                                                                                                                                         | Did a health care provider weigh you?                                                                                                                                                                                           | _     |
|     |                                                                                                                                                         | Did a health care provider talk with you about your weight?                                                                                                                                                                     | _     |
| 617 | During this pregnancy, did you ever receive food or cash assistance from government, an NGO, religious institution or other group?                      | 1 = Yes<br>0 = No ( <b>Go to 619</b> )                                                                                                                                                                                          | _     |
| 618 | What type of assistance did you receive?                                                                                                                | 1 = Cash only<br>2 = Food only<br>3 = Cash and food mix<br>99 = Other (specify)                                                                                                                                                 | _ _ _ |
| 619 | During this pregnancy, were you given or did you buy any iron tablets or iron syrup?<br><br><b>show tablets/syrup/multiple micronutrient supplement</b> | 1 = Yes<br>0 = No ( <b>Go to 622</b> )<br>98 = Don't Know ( <b>Go to 622</b> )                                                                                                                                                  | _ _ _ |
| 620 | Where did you get the iron tablet or syrup from?                                                                                                        | 1 = Govt. Health Facility<br>2 = Private Health Facility<br>3 = Mobile Clinic<br>4 = CHW<br>5 = [Mass Distribution Campaign – Add Local Name]<br>6 = Pharmacy<br>7 = Shop/Market<br>8 = School<br>98 = Don't Know<br>99 = Other | _ _ _ |
| 621 | During this pregnancy, for how many days did you take the iron tablets?<br><b>If answer is not numeric, probe for</b>                                   | Number of days (specify)<br>98 = Don't Know                                                                                                                                                                                     | _ _ _ |

|                                                                                                                                                                                              | <i>approximate number of days.</i> |                                                                                              |                                                           |       |
|----------------------------------------------------------------------------------------------------------------------------------------------------------------------------------------------|------------------------------------|----------------------------------------------------------------------------------------------|-----------------------------------------------------------|-------|
| 1<br>2<br>3<br>4                                                                                                                                                                             | 622                                | During this pregnancy, did you take any drug for intestinal worms?                           | 1 = Yes<br>0 = No<br>98 = Don't Know                      | _ _ _ |
| 5<br>6<br>7                                                                                                                                                                                  | 623                                | During this pregnancy, did any health care provider talk with you about breastfeeding?       | 1 = Yes<br>0 = No<br>98 = Don't Know                      | _ _ _ |
| 8<br>9<br>10                                                                                                                                                                                 | 624                                | During this pregnancy, did you practice fasting?                                             | 1 = Yes<br>0 = No<br>98 = Don't Know                      | _ _ _ |
| 11<br>12<br>13<br>14                                                                                                                                                                         | 625                                | At your last ANC visit, did the health provider weigh you?                                   | 1 = Yes<br>0 = No<br>98 = Don't Know                      | _ _ _ |
| 15<br>16<br>17                                                                                                                                                                               | 626                                | During this pregnancy has your health provider given you information about your weight gain? | 1 = Yes<br>0 = No ( <b>Go to 629</b> )<br>98 = Don't Know | _ _ _ |
| 18<br>19<br>20<br>21                                                                                                                                                                         | 627                                | During your pregnancy have you been thin for your height?                                    | 1 = Yes<br>0 = No<br>98 = Don't Know                      | _ _ _ |
| 22<br>23                                                                                                                                                                                     | 628                                | Did you received treatment for malnutrition?                                                 | 1 = Yes<br>0 = No                                         | _ _ _ |
| 24                                                                                                                                                                                           | <b>Anthropometry</b>               |                                                                                              |                                                           |       |
| 25                                                                                                                                                                                           | 629                                | Weight (in kg)                                                                               |                                                           |       |
| 26                                                                                                                                                                                           | 630                                | Height (in CM)                                                                               |                                                           |       |
| 27                                                                                                                                                                                           | 631                                | MUAC                                                                                         |                                                           |       |
| 28                                                                                                                                                                                           | 632                                | Waist circumference (in cm)                                                                  |                                                           |       |
| 29<br>30<br>31<br>32<br>33<br>34<br>35<br>36<br>37<br>38<br>39<br>40<br>41<br>42<br>43<br>44<br>45<br>46<br>47<br>48<br>49<br>50<br>51<br>52<br>53<br>54<br>55<br>56<br>57<br>58<br>59<br>60 | 633                                | Goiter                                                                                       | 1 = Yes<br>0 = No                                         |       |

### Module 7: Women Dietary Diversity

| "Now I'd like to ask you about foods and drinks that you ate or drank yesterday during the day or night, whether you ate it at home or anywhere else. |                                                                                                                                                                                            |                                                                                                                                                   |
|-------------------------------------------------------------------------------------------------------------------------------------------------------|--------------------------------------------------------------------------------------------------------------------------------------------------------------------------------------------|---------------------------------------------------------------------------------------------------------------------------------------------------|
| Yesterday, during the day or at night did you eat or drink:                                                                                           |                                                                                                                                                                                            |                                                                                                                                                   |
| S.N                                                                                                                                                   | Question                                                                                                                                                                                   | Response<br>1 = Yes<br>0 = No                                                                                                                     |
| 701                                                                                                                                                   | Woman's code                                                                                                                                                                               |                                                                                                                                                   |
| 702                                                                                                                                                   | Woman's name                                                                                                                                                                               | Given name                                                                                                                                        |
| 703                                                                                                                                                   | Woman's age                                                                                                                                                                                |                                                                                                                                                   |
| 704                                                                                                                                                   | Woman's education level                                                                                                                                                                    | 0=None<br>1=Primary<br>2=Secondary<br>3=Technical/vocational certificate<br>4=Higher / university/ college<br>98=Don't know<br>99=Other (specify) |
| 705                                                                                                                                                   | Woman's marital status                                                                                                                                                                     | 1= Single<br>2= Married<br>3= Divorced<br>4= Separated<br>5= Widowed                                                                              |
| 706                                                                                                                                                   | Woman's religion                                                                                                                                                                           | 1=Orthodox<br>2=Protestant<br>3=Catholic/other Christian<br>4=Muslim<br>5=No religion<br>98=Don't know<br>99=Other religion (specify)             |
| 707                                                                                                                                                   | Woman's ethnicity                                                                                                                                                                          | Specify                                                                                                                                           |
| 708                                                                                                                                                   | Any vegetables or roots that are orange-colored inside, like: pumpkin, carrots, squash, or sweet potatoes that are yellow or orange inside                                                 | _                                                                                                                                                 |
| 709                                                                                                                                                   | Any white roots and tubers or plantains, such as: white potatoes, white yams, manioc/cassava/yucca, cocoyam, taro or any other foods made from white-fleshed roots or tubers, or plantains | _                                                                                                                                                 |
| 710                                                                                                                                                   | Any dark green leafy vegetables, such as: [list examples of any medium-to-dark green leafy vegetables including wild/foraged leaves]                                                       | _                                                                                                                                                 |
| 711                                                                                                                                                   | Any fruits that are dark yellow or orange inside, like: ripe mango, ripe papaya                                                                                                            | _                                                                                                                                                 |
| 712                                                                                                                                                   | Any other fruits                                                                                                                                                                           | _                                                                                                                                                 |
| 713                                                                                                                                                   | Any other vegetables                                                                                                                                                                       | _                                                                                                                                                 |
| 714                                                                                                                                                   | Any meat made from animal organs, such as: liver, kidney, heart or other organ meats or blood-based foods, including from wild game                                                        | _                                                                                                                                                 |
| 715                                                                                                                                                   | Any other types of meat or poultry, like: beef, pork, lamb, goat, rabbit, wild game meat, chicken, duck, other birds                                                                       | _                                                                                                                                                 |

|    |     |                                                                                                                                                                                         |   |
|----|-----|-----------------------------------------------------------------------------------------------------------------------------------------------------------------------------------------|---|
| 1  | 716 | Any eggs                                                                                                                                                                                | _ |
| 2  | 717 | Any fish or seafood, whether fresh or dried                                                                                                                                             | _ |
| 3  | 718 | Any beans or peas, such as: mature beans or peas (fresh or dried seed), lentils, or bean/pea products, including hummus, tofu and tempeh                                                | _ |
| 4  | 719 | Any nuts or seeds, like tree nut, groundnut/peanut, or certain seeds or nut/seed “butters” or pastes                                                                                    | _ |
| 5  | 720 | Any milk or milk products, such as: milk, cheese, yoghurt or other milk products, but not including butter, ice cream, cream or sour cream                                              | _ |
| 6  | 721 | Any oils and fats                                                                                                                                                                       | _ |
| 7  | 722 | Any savory and fried snacks, such as: crisps and chips, fried dough, other fried snacks                                                                                                 | _ |
| 8  | 723 | Any sweets, such as: sugary foods, such as chocolates, candies, cookies/sweet biscuits and cakes, sweet pastries or ice cream                                                           | _ |
| 9  | 724 | Any sugar-sweetened beverages, like: sweetened fruit juices and “juice drinks”, soft drinks/fizzy drinks, chocolate drinks, malt drinks, yoghurt drinks, sweet tea or coffee with sugar | _ |
| 10 | 725 | Any condiments and seasonings, such as: ingredients used in small quantities for flavour, such as chilies, spices, herbs, fish powder, tomato paste, flavor cubes or seeds              | _ |
| 11 | 726 | Any other beverages and foods like tela, tej, bordea, arkea, cheka, tselo                                                                                                               | _ |
| 12 | 727 | Did you eat anything (meal or snack) OUTSIDE of the home yesterday?                                                                                                                     | _ |
| 13 | 728 | Did you fast yesterday during the day or night?                                                                                                                                         | _ |

**Module 8: SELF-REPORTING QUESTIONNAIRE (SRQ-20)**

| No  | Question                                                 | Answer<br>1 = Yes<br>0 = No |   |
|-----|----------------------------------------------------------|-----------------------------|---|
| 801 | Do you often have headaches?                             |                             | _ |
| 802 | Is your appetite poor?                                   |                             | _ |
| 803 | Do you sleep badly?                                      |                             | _ |
| 804 | Are you easily frightened?                               |                             | _ |
| 805 | Do your hands shake?                                     |                             | _ |
| 806 | Do you feel nervous, tense or worried?                   |                             | _ |
| 807 | Is your digestion poor?                                  |                             | _ |
| 808 | Do you have trouble thinking clearly?                    |                             | _ |
| 809 | Do you feel unhappy?                                     |                             | _ |
| 810 | Do you cry more than usual?                              |                             | _ |
| 811 | Do you find it difficult to enjoy your daily activities? |                             | _ |
| 812 | Do you find it difficult to make decisions?              |                             | _ |
| 813 | Is your daily work suffering?                            |                             | _ |
| 814 | Are you unable to play a useful part in life?            |                             | _ |
| 815 | Have you lost interest in things?                        |                             | _ |
| 816 | Do you feel that you are a worthless person?             |                             | _ |
| 817 | Has the thought of ending your life been on your mind?   |                             | _ |
| 818 | Do you feel tired all the time?                          |                             | _ |
| 819 | Do you have uncomfortable feelings in your stomach?      |                             | _ |
| 820 | Are you easily tired?                                    |                             | _ |

## Module 9: Women empowerment

|     |                                                                                                                                                               |                                                                             |       |
|-----|---------------------------------------------------------------------------------------------------------------------------------------------------------------|-----------------------------------------------------------------------------|-------|
| 901 | Identify the most senior mother of the mothers who have a selected child. She is the mother who should respond to the rest of this interview from this point. |                                                                             | _ _ _ |
| 902 | In the past major growing season (Meher) and minor growing (Belg) season, not including the current season, did you work on the family farm?                  | 1 = Yes<br>0 = No → <b>Go to 913</b> )                                      | _     |
| 903 | What sort of work you did on the family farm?                                                                                                                 | 1 = Home (kitchen) gardening                                                | _     |
| 904 |                                                                                                                                                               | 2 = Fieldwork                                                               | _     |
| 905 |                                                                                                                                                               | 3 = Cash crop farming                                                       | _     |
| 906 |                                                                                                                                                               | 4 = Dairy processing                                                        | _     |
| 907 |                                                                                                                                                               | 5 = Poultry rearing                                                         | _     |
| 908 |                                                                                                                                                               | 6 = Raising livestock                                                       | _     |
| 909 |                                                                                                                                                               | 7 = Fishpond/ aquaculture                                                   | _     |
| 910 |                                                                                                                                                               | 99 = Other (specify)                                                        | _     |
| 911 | From the work that you did on the farm did your household earn any money?                                                                                     | 1 = Yes<br>0 = No<br>98 = Don't know                                        | _     |
| 912 | Who usually decides how the money you earn will be used?<br><br><b>READ THE LIST.</b>                                                                         | 1 = Self<br>2 = Husband<br>3 = Self and husband jointly<br>4 = Someone else | _     |
| 913 | Who usually makes decisions about major household purchases/sell such as cattle or livestock?<br><br><b>READ THE LIST.</b>                                    | 1 = Self<br>2 = Husband<br>3 = Self and husband jointly<br>4 = Someone else | _     |
| 914 | Who usually makes decisions about minor household purchases/sell such as spices/oils, soap, utensils, or daily household needs?<br><br><b>READ THE LIST.</b>  | 1 = Self<br>2 = Husband<br>3 = Self and husband jointly<br>4 = Someone else | _     |
| 915 | Who usually makes decisions about health care for your children?<br><br><b>READ THE LIST.</b>                                                                 | 1 = Self<br>2 = Husband<br>3 = Self and husband jointly<br>4 = Someone else | _     |
| 916 | Do you have husband?                                                                                                                                          | 1 = Yes<br>0 = No ( <b>Go to 918</b> )                                      | _     |
| 917 | Who usually decides how the money your husband earns will be used?<br><br><b>READ THE LIST.</b>                                                               | 1 = Self<br>2 = Husband<br>3 = Self and husband jointly<br>4 = Someone else | _     |

|     |                                                                                                                                                |                                                         |   |
|-----|------------------------------------------------------------------------------------------------------------------------------------------------|---------------------------------------------------------|---|
| 918 | Do you have children?                                                                                                                          | 1 = Yes<br>0 = No ( <b>Go to 923</b> )                  |   |
| 919 | Does your husband help you care for the children?                                                                                              | 1 = Yes<br>0 = No ( <b>Go to 923</b> )                  | _ |
| 920 | Does he help care for the children almost every day, at least once a week, or rarely?                                                          | 1 = Every day<br>2 = At least once a week<br>3 = Rarely | _ |
| 921 | Does your husband help you with household chores like cooking, cleaning the house, fetching water, collecting firewood or other domestic work? | 1 = Yes<br>0 = No ( <b>Go to 923</b> )                  | _ |
| 922 | Does he help almost every day, at least once a week, or rarely?                                                                                | 1 = Every day<br>2 = At least once a week<br>3 = Rarely | _ |

|     |                                                                    |                                                                                |                                      |         |
|-----|--------------------------------------------------------------------|--------------------------------------------------------------------------------|--------------------------------------|---------|
| 923 | At any time during the previous                                    | Use improved seed varieties for any of your crops?                             | 1 = Yes<br>0 = No<br>98 = Don't know | _     _ |
| 924 | major seasons (Meher) and minor season                             | Keep improved varieties of livestock?                                          | 1 = Yes<br>0 = No<br>98 = Don't know | _     _ |
| 925 | (Belg) not including the current                                   | Use animal manure to improve you crops yield?                                  | 1 = Yes<br>0 = No<br>98 = Don't know | _     _ |
| 926 | season,<br>Did you:                                                | Use any other source of fertilizer on your crops?                              | 1 = Yes<br>0 = No<br>98 = Don't know | _     _ |
| 927 |                                                                    | Irrigate your crops?                                                           | 1 = Yes<br>0 = No<br>98 = Don't know | _     _ |
| 928 |                                                                    | Rotate your crops from one field to another when planting?                     | 1 = Yes<br>0 = No<br>98 = Don't know | _     _ |
| 929 |                                                                    | Harvest water during the rains?                                                | 1 = Yes<br>0 = No<br>98 = Don't know | _     _ |
| 930 |                                                                    | Practice intercropping?                                                        | 1 = Yes<br>0 = No<br>98 = Don't know | _     _ |
| 931 | Have you ever taken any steps to reduce soil erosion on your farm? | 1 = Yes<br>0 = No ( <b>Go to 936</b> )<br>98 = Don't know ( <b>Go to 936</b> ) | _     _                              |         |
|     |                                                                    | For each mentioned: 1=Yes 0=No                                                 |                                      |         |
| 932 | What steps did you take to reduce soil erosion?                    | Plant trees or shrubs                                                          | _                                    |         |
| 933 |                                                                    | Terracing                                                                      | _                                    |         |



|     |                                                                              |                                          |    |
|-----|------------------------------------------------------------------------------|------------------------------------------|----|
| 934 |                                                                              | Use drainage system                      | __ |
| 935 |                                                                              | Other                                    | __ |
| 936 | Have you received any inputs for your farm from a social/government program? | 1 = Yes<br>0 = No ( <b>Go to 1001</b> )  | __ |
| 937 | What farm inputs have you received?                                          | For each mentioned: 1=Yes 0=No           |    |
| 938 |                                                                              | Seeds                                    | __ |
| 939 |                                                                              | Improved seeds                           | __ |
| 940 |                                                                              | Livestock or poultry                     | __ |
| 941 |                                                                              | Improved varieties of livestock/ poultry | __ |
| 942 |                                                                              | Aquaculture (fish)                       | __ |
| 943 |                                                                              | Fertilizer                               | __ |
| 944 |                                                                              | Other                                    | __ |

For peer review only

## Module 10: WASH

| No   | Question                                                                                                                                         | choices                                                                                                                                                                                                                                                                                                                                                                                                                          |       |
|------|--------------------------------------------------------------------------------------------------------------------------------------------------|----------------------------------------------------------------------------------------------------------------------------------------------------------------------------------------------------------------------------------------------------------------------------------------------------------------------------------------------------------------------------------------------------------------------------------|-------|
| 1001 | What is the main source of drinking water for the household?<br><br><b>Do not read list</b>                                                      | 1 = Piped into dwelling<br>2 = Piped to yard/plot<br>3 = Piped to neighbour<br>4 = Public tap/standpipe<br>5 = Tube well or borehole<br>6 = Protected well<br>7 = Unprotected well<br>8 = Protected spring<br>9 = Unprotected spring<br>10 = Rainwater<br>11 = Tanker truck<br>12 = Cart with small tank<br>13 = Surface water (river/dam/<br>Lake/pond/stream/canal/ irrigation<br>channel)<br>14 = Bottled water<br>99 = Other | _ _ _ |
| 1002 | Do you do anything to your household water to make it safer to drink?                                                                            | 1 = Yes<br>0 = No ( <b>Go to 1004</b> )<br>98 = Don't know ( <b>Go to 1004</b> )                                                                                                                                                                                                                                                                                                                                                 | _ _ _ |
| 1003 | What is the main thing you do to make the water safer?                                                                                           | 1 = Boil<br>2 = Add bleach/chlorine<br>3 = Strain through a cloth<br>4 = Use water filter (ceramic/<br>Sand/composite/etc)<br>5 = Solar disinfection<br>6 = Let it stand and settle<br>7 = Other(specify)<br>98 = Don't know                                                                                                                                                                                                     | _ _ _ |
| 1004 | What kind of toilet facility do members of your household usually use? If not possible to determine, ask for Permission to observe the facility. | 1 = Flush to piped sewer system<br>2 = Flush to septic tank<br>3 = Flush to pit latrine<br>4 = Flush to somewhere else<br>5 = Flush, don't know where<br>6 = Ventilated improved pit latrine<br>7 = Pit latrine with slab<br>8 = Pit latrine without slab/open pit<br>9 = Composting toilet<br>10 = Bucket toilet<br>11 = Hanging toilet/hanging latrine<br>12 = No facility/bush/field<br>99 = Other (specify)_____             | _ _ _ |
| 1005 | How does your HH primarily dispose of HH waste?                                                                                                  | 1 = Collected by municipality<br>2 = Buried<br>3 = Collected by private establishment<br>4 = Dumped in street/open space                                                                                                                                                                                                                                                                                                         | _ _ _ |

|      |                                                                                         |                                                                                                                                                                                                                                                                                                                  |       |
|------|-----------------------------------------------------------------------------------------|------------------------------------------------------------------------------------------------------------------------------------------------------------------------------------------------------------------------------------------------------------------------------------------------------------------|-------|
|      |                                                                                         | 5 = Disposed in the compound<br>6 = Dumped in river<br>7 = Burned<br>98 = Other                                                                                                                                                                                                                                  |       |
| 1006 | Do you have separate cooking room?                                                      | 1 = Yes<br>2 = No ( <b>Go to 1008</b> )                                                                                                                                                                                                                                                                          |       |
| 1007 | Does the stove or cooking room have a chimney?                                          | 1 = yes<br>2 = No                                                                                                                                                                                                                                                                                                | _ _ _ |
| 1008 | What type of fuel or energy source is used in this cook stove?                          | 1 = Alcohol/ethanol<br>2 = Gasoline/diesel<br>3 = Kerosene/paraffin<br>4 = Coal/lignite<br>5 = Charcoal<br>6 = Wood<br>7 = Straw/shrubs/grass<br>8 = Agricultural crop<br>9 = Animal dung/waste<br>10 = Processed biomass (pellets) or woodchips<br>11 = Garbage/plastic<br>12 = Sawdust<br>96 = Other (specify) | _ _ _ |
| 1009 | Do you have a confined space (beret/gata) to keep livestock?                            | 1 = Yes<br>0 = No<br>96 = Not applicable                                                                                                                                                                                                                                                                         | _     |
| 1010 | Do you keep poultry in cages/confined systems (kote)?                                   | 1 = Yes<br>0 = No<br>96 = Not applicable                                                                                                                                                                                                                                                                         | _     |
| 1011 | What do you think are the activities before which you should wash your hands with soap? | For each mentioned: <b>1=Yes 0=No</b>                                                                                                                                                                                                                                                                            |       |
| 1012 |                                                                                         | Before preparing food                                                                                                                                                                                                                                                                                            | _     |
| 1013 |                                                                                         | Before touching or eating food                                                                                                                                                                                                                                                                                   | _     |
| 1014 |                                                                                         | Before feeding a child or other person                                                                                                                                                                                                                                                                           | _     |
| 1015 | <b>DO NOT PROMPT.</b>                                                                   | Praying                                                                                                                                                                                                                                                                                                          | _     |
| 1016 |                                                                                         | Don't know                                                                                                                                                                                                                                                                                                       | _     |
| 1017 | What do you think are the activities after which you should wash your hands with soap?  | For each mentioned: <b>1=Yes 0=No</b>                                                                                                                                                                                                                                                                            |       |
| 1018 |                                                                                         | After defecation or urinating                                                                                                                                                                                                                                                                                    | _     |
| 1019 |                                                                                         | After handling animals and their waste                                                                                                                                                                                                                                                                           | _     |
| 1020 |                                                                                         | After housework or fieldwork                                                                                                                                                                                                                                                                                     | _     |
| 1021 | <b>DO NOT PROMPT.</b>                                                                   | After touching pets or handling animals and their waste                                                                                                                                                                                                                                                          | _     |
| 1022 |                                                                                         | After blowing nose or coughing                                                                                                                                                                                                                                                                                   | _     |
| 1023 |                                                                                         | After cleaning a child's bottom                                                                                                                                                                                                                                                                                  | _     |
| 1024 |                                                                                         | None                                                                                                                                                                                                                                                                                                             | _     |
| 1025 | What do you think are the reasons to keep poultry and livestock in a confined space?    | To keep out of house<br> _                                                                                                                                                                                                                                                                                       |       |
| 1026 | For each mentioned: <b>1=Yes 0=No</b>                                                   | To keep away from water source                                                                                                                                                                                                                                                                                   | _     |
| 1027 |                                                                                         | To reduce infectious disease                                                                                                                                                                                                                                                                                     | _     |

|      |                       |                              |   |
|------|-----------------------|------------------------------|---|
| 1028 | <b>DO NOT PROMPT.</b> | To protect livestock/poultry | _ |
| 1029 |                       | Other                        |   |

For peer review only

**Module 11: Food fortification (household coverage of fortifiable foods)**

| SN   | Question                                                                                                                                                             | Response                                                                                                                                                                                                                                                           |        |
|------|----------------------------------------------------------------------------------------------------------------------------------------------------------------------|--------------------------------------------------------------------------------------------------------------------------------------------------------------------------------------------------------------------------------------------------------------------|--------|
| 1101 | Does your household use cooking oil to prepare foods or add to foods at home?                                                                                        | 1 = Yes<br>0 = No →Go to 1103                                                                                                                                                                                                                                      | __     |
| 1102 | The last time your household get cooking oil, where did you get it from?                                                                                             | 1=Purchased from market/shop/kiosk/wholesaler/street vendor<br>2= Homemade or obtained from local farm or local small factory/processor...<br><br>3= Received from food aid/social protection program<br>4 = Other (specify): _____<br><br>98= Don't know/remember | __  __ |
| 1103 | Does your household prepare foods using wheat flour at home, such as bread, kita, injera?                                                                            | 1 = Yes<br>0 = No →Go to 1105                                                                                                                                                                                                                                      | __     |
| 1104 | The last time your household get wheat flour, where did you get it from?                                                                                             | 1=Purchased from market/shop/kiosk/wholesaler/street vendor<br>2= Homemade or obtained from local farm or local small factory/processor...<br><br>3= Received from food aid/social protection program<br>4 = Other (specify): _____<br><br>98= Don't know/remember | __  __ |
| 1105 | I would like to check whether the salt used in your household is iodized. May I have a sample of the salt used to cook meals in your household? Test salt for iodine | 1=Iodine present<br>2= No iodine<br>3= Household uses salt but there is no salt in household<br>4= Household does not use salt<br>5= Salt not tested, specify reason_____                                                                                          | __     |
| 1106 | The last time your household get salt, where did you get it from?                                                                                                    | 1=Purchased from market/shop/kiosk/wholesaler/street vendor<br>2= Homemade or obtained from local farm or local small factory/processor...<br><br>3= Received from food aid/social protection program<br>98= Don't know/remember                                   | __  __ |

|  |  |                             |  |
|--|--|-----------------------------|--|
|  |  | 99 = Other (specify): _____ |  |
|--|--|-----------------------------|--|

For peer review only

## Module 12 – Agriculture practices

| About the household |                                                                                                                                                                                                  |                                                                                                                         |         |
|---------------------|--------------------------------------------------------------------------------------------------------------------------------------------------------------------------------------------------|-------------------------------------------------------------------------------------------------------------------------|---------|
| 1201                | Does any member of the household own any agricultural land (purchased or own?)                                                                                                                   | 1 = Yes<br>0 = No ( <b>Go to 1212</b> )                                                                                 | _       |
| 1202                | How many hectares of agricultural land do members of this household own?<br><br><i>Note: Convert local land measurement unit into hector after discussing with agriculture focal person/AEW.</i> | Enter total number of hectares (If less than 1, Enter in decimals (example 0.5)<br>Enter 9999 if hectares are not known | _ _ _ _ |
| 1203                | In the past major growing season (Meher) and minor growing (Belg) season, not including the current season, did you work on the family farm?                                                     | 1 = Yes<br>0 = No ( <b>Go to 1211</b> )                                                                                 | _       |
|                     | What sort of work did you do on the family farm?                                                                                                                                                 | 1 = Yes 0 = No                                                                                                          |         |
| 1204                | READ THE LIST                                                                                                                                                                                    | 1 = Home (kitchen) gardening                                                                                            | _       |
| 1205                |                                                                                                                                                                                                  | 2 = Fieldwork                                                                                                           | _       |
| 1206                |                                                                                                                                                                                                  | 3 = Cash crop farming                                                                                                   | _       |
| 1207                |                                                                                                                                                                                                  | 4 = Producing dairy                                                                                                     | _       |
| 1208                |                                                                                                                                                                                                  | 5 = Rearing poultry                                                                                                     | _       |
| 1209                |                                                                                                                                                                                                  | 6 = Raising livestock                                                                                                   | _       |
| 1210                |                                                                                                                                                                                                  | 7 = Fishpond/ aquaculture                                                                                               | _       |
|                     |                                                                                                                                                                                                  | 99 = Other .....                                                                                                        | _       |
| 1211                | Does this household own any livestock, herds, other farm animals, or poultry?                                                                                                                    | 1 = Yes<br>0 = No → <b>Go to 1221</b>                                                                                   | _       |
|                     | How many of the following animals do this household own?                                                                                                                                         | For each: Enter number. <b>If none, enter 0</b>                                                                         |         |
| 1212                |                                                                                                                                                                                                  | Chickens                                                                                                                | _ _ _ _ |
| 1213                |                                                                                                                                                                                                  | Goats                                                                                                                   | _ _ _ _ |
| 1214                |                                                                                                                                                                                                  | Sheep                                                                                                                   | _ _ _ _ |
| 1215                |                                                                                                                                                                                                  | Donkeys                                                                                                                 | _ _ _ _ |
| 1216                |                                                                                                                                                                                                  | Horses                                                                                                                  | _ _ _ _ |
| 1217                |                                                                                                                                                                                                  | Mules                                                                                                                   | _ _ _ _ |
| 1218                |                                                                                                                                                                                                  | Camels                                                                                                                  | _ _ _ _ |
| 1219                |                                                                                                                                                                                                  | Milk cows                                                                                                               | _ _ _ _ |
| 1220                |                                                                                                                                                                                                  | Oxen                                                                                                                    | _ _ _ _ |

In the past 2 growing seasons (Meher and Belg), not including the current season, please describe all the crops (cereals, legumes, vegetables, fruits, seeds, and other crops) grown on your household farm.

Please also describe all animal source foods (meat, eggs, milk, dairy, fish, other) that you have produced on your household farm in same period.

Write down all crops and animals mentioned by the respondent. When the respondent has finished, probe for crops and animal source foods not mentioned. Then ask about production/yields in the relevant units. Ask the respondent to estimate the amount of the total production that went to sales, food consumption, and storage/losses/other uses.

|      | Group            | Crop                | Did HH cultivate crop?<br>1 = yes<br>0 = No | Season<br>1=Meher<br>2=Belg<br>3=Both | Amount | During the previous Major seasons (Meher) and Minor season (Belg) not including the current season |          |                                            |
|------|------------------|---------------------|---------------------------------------------|---------------------------------------|--------|----------------------------------------------------------------------------------------------------|----------|--------------------------------------------|
|      |                  |                     |                                             |                                       |        | Sold                                                                                               | Consumed | Storage, losses, animal feed or other uses |
| 1221 | Staples          | Maize               | _                                           |                                       | _      | _     _                                                                                            | _     _  | _     _                                    |
| 1222 |                  | Teff                | _                                           |                                       | _      | _     _                                                                                            | _     _  | _     _                                    |
| 1223 |                  | Wheat               | _                                           |                                       | _      | _     _                                                                                            | _     _  | _     _                                    |
| 1224 |                  | Barley              | _                                           |                                       | _      | _     _                                                                                            | _     _  | _     _                                    |
| 1225 |                  | Sorghum             | _                                           |                                       | _      | _     _                                                                                            | _     _  | _     _                                    |
| 1226 |                  | Millet              | _                                           |                                       | _      | _     _                                                                                            | _     _  | _     _                                    |
| 1227 |                  | Rice                | _                                           |                                       | _      | _     _                                                                                            | _     _  | _     _                                    |
| 1228 |                  | Emmer wheat (oaths) | _                                           |                                       | _      | _     _                                                                                            | _     _  | _     _                                    |
| 1229 |                  | Other cereals       | _                                           |                                       | _      | _     _                                                                                            | _     _  | _     _                                    |
| 1230 | Pulses (legumes) | Bean                | _                                           |                                       | _      | _     _                                                                                            | _     _  | _     _                                    |
| 1231 |                  | Haricot bean        | _                                           |                                       | _      | _     _                                                                                            | _     _  | _     _                                    |
| 1232 |                  | Lentil (Miser)      | _                                           |                                       | _      | _     _                                                                                            | _     _  | _     _                                    |
| 1233 |                  | Grass pea (guaya)   | _                                           |                                       | _      | _     _                                                                                            | _     _  | _     _                                    |
| 1234 |                  | Chickpea            | _                                           |                                       | _      | _     _                                                                                            | _     _  | _     _                                    |
| 1235 |                  | Field pea (Ater)    | _                                           |                                       | _      | _     _                                                                                            | _     _  | _     _                                    |
| 1236 |                  | Soya bean           | _                                           |                                       | _      | _     _                                                                                            | _     _  | _     _                                    |



|      |                                    |                                      |         |   |   |     |     |     |
|------|------------------------------------|--------------------------------------|---------|---|---|-----|-----|-----|
| 1237 |                                    | Other legumes                        | _       |   | _ | _ _ | _ _ | _ _ |
| 1238 | Oil Crops                          | Niger seed (Nug)                     | _       |   | _ | _ _ | _ _ | _ _ |
| 1239 |                                    | Sunflower                            | _       |   | _ | _ _ | _ _ | _ _ |
| 1240 |                                    | Sesame                               | _       |   | _ | _ _ | _ _ | _ _ |
| 1241 |                                    | Linseed                              | _       |   | _ | _ _ | _ _ | _ _ |
| 1242 |                                    | Rapeseed (Gomenzer)                  | _       |   | _ | _ _ | _ _ | _ _ |
| 1243 |                                    | Lupine (Gibto)                       | _       |   | _ | _ _ | _ _ | _ _ |
| 1244 |                                    | Nuts                                 |         |   |   | _ _ | _ _ | _ _ |
| 1245 |                                    | Other oil crops                      | _       |   | _ | _ _ | _ _ | _ _ |
| 1246 |                                    | Root crops/<br>tubers/<br>vegetables | Cassava | _ |   | _   | _ _ | _ _ |
| 1247 | Enset                              |                                      | _       |   | _ | _ _ | _ _ | _ _ |
| 1248 | Irish potato                       |                                      | _       |   | _ | _ _ | _ _ | _ _ |
| 1249 | Sweet potato                       |                                      | _       |   | _ | _ _ | _ _ | _ _ |
| 1250 | Sweet potato - orange flesh        |                                      | _       |   | _ | _ _ | _ _ | _ _ |
| 1251 | Onion                              |                                      | _       |   | _ | _ _ | _ _ | _ _ |
| 1252 | Pepper                             |                                      | _       |   | _ | _ _ | _ _ | _ _ |
| 1253 | Tomato                             |                                      | _       |   | _ | _ _ | _ _ | _ _ |
| 1254 | Cabbage                            |                                      | _       |   | _ | _ _ | _ _ | _ _ |
| 1255 | Other light green leafy vegetables |                                      | _       |   | _ | _ _ | _ _ | _ _ |
| 1256 | Kale                               |                                      | _       |   | _ | _ _ | _ _ | _ _ |
| 1257 | Other dark green leafy vegetables  |                                      | _       |   | _ | _ _ | _ _ | _ _ |
| 1258 | Carrot                             |                                      | _       |   | _ | _ _ | _ _ | _ _ |
| 1259 | Other roots or tubers              |                                      | _       |   | _ | _ _ | _ _ | _ _ |
| 1260 | Other vegetables                   |                                      | _       |   | _ | _ _ | _ _ | _ _ |
| 1261 | Perennial crops/<br>fruits         | Coffee                               | _       |   | _ | _ _ | _ _ | _ _ |
| 1262 |                                    | Chat (khat)                          | _       |   | _ | _ _ | _ _ | _ _ |
| 1263 |                                    | Banana                               | _       |   | _ | _ _ | _ _ | _ _ |
| 1264 |                                    | Orange                               | _       |   | _ | _ _ | _ _ | _ _ |
| 1265 |                                    | Mango                                | _       |   | _ | _ _ | _ _ | _ _ |
| 1266 |                                    | Hop                                  | _       |   | _ | _ _ | _ _ | _ _ |

|      |                             |   |  |   |       |       |       |
|------|-----------------------------|---|--|---|-------|-------|-------|
|      | (Gesho)                     |   |  |   |       |       |       |
| 1267 | Avocado                     | _ |  | _ | _ _ _ | _ _ _ | _ _ _ |
| 1268 | Lemon                       | _ |  | _ | _ _ _ | _ _ _ | _ _ _ |
| 1269 | Papaya                      | _ |  | _ | _ _ _ | _ _ _ | _ _ _ |
| 1270 | Guava                       | _ |  | _ | _ _ _ | _ _ _ | _ _ _ |
| 1271 | Water<br>Melon              | _ |  | _ | _ _ _ | _ _ _ | _ _ _ |
| 1272 | Tirngo fruit                | _ |  | _ | _ _ _ | _ _ _ | _ _ _ |
| 1273 | Other<br>perennial<br>crops | _ |  | _ | _ _ _ | _ _ _ | _ _ _ |
| 1274 | Other fruits                | _ |  | _ | _ _ _ | _ _ _ | _ _ _ |

|      | Group       | Animal source food (unit)      | Does HH produce?<br><b>1=yes</b><br><b>0=no</b><br><i>(If no, skip to the next item)</i> | Amount | During the previous Major seasons (Meher) and Minor season (Belg) not including the current season |           |          |                                        |
|------|-------------|--------------------------------|------------------------------------------------------------------------------------------|--------|----------------------------------------------------------------------------------------------------|-----------|----------|----------------------------------------|
|      |             |                                |                                                                                          |        | Season<br>1=Meher<br>2=Belg<br>3=Both                                                              | How much? |          |                                        |
|      |             |                                |                                                                                          |        |                                                                                                    | Sold      | Consumed | Storage, losses, animal feed or others |
| 1275 | All         | Chicken eggs                   |                                                                                          | _      | _                                                                                                  | _ _       | _ _      | _ _                                    |
| 1276 |             | Chicken meat                   |                                                                                          | _      | _                                                                                                  | _ _       | _ _      | _ _                                    |
| 1277 |             | Goat milk                      |                                                                                          | _      | _                                                                                                  | _ _       | _ _      | _ _                                    |
| 1278 |             | Goat meat                      |                                                                                          | _      | _                                                                                                  | _ _       | _ _      | _ _                                    |
| 1279 |             | Camel milk                     |                                                                                          | _      | _                                                                                                  | _ _       | _ _      | _ _                                    |
| 1280 |             | Sheep meat                     |                                                                                          | _      | _                                                                                                  | _ _       | _ _      | _ _                                    |
| 1281 |             | Cow milk                       |                                                                                          | _      | _                                                                                                  | _ _       | _ _      | _ _                                    |
| 1282 |             | Cow other dairy                |                                                                                          | _      | _                                                                                                  | _ _       | _ _      | _ _                                    |
| 1283 |             | Beef                           |                                                                                          | _      | _                                                                                                  | _ _       | _ _      | _ _                                    |
| 1284 |             | Other meat (e.g. camel, horse) |                                                                                          | _      | _                                                                                                  | _ _       | _ _      | _ _                                    |
| 1285 | Farmed fish |                                | _                                                                                        | _      | _ _                                                                                                | _ _       | _ _      |                                        |

### Module 13: Household food insecurity

| Now I would like to ask you some questions about food. During the last 12 MONTHS, was there a time when: |                                                                                                                                                                                              |                                               |       |
|----------------------------------------------------------------------------------------------------------|----------------------------------------------------------------------------------------------------------------------------------------------------------------------------------------------|-----------------------------------------------|-------|
| SN                                                                                                       | Questions                                                                                                                                                                                    | Answers                                       |       |
| 1301                                                                                                     | You or others in your household worried about not having enough food to eat because of a lack of money or other resources?                                                                   | 1=Yes<br>0= No<br>98=Don't know<br>97=Refused | _ _ _ |
| 1302                                                                                                     | Still thinking about the last 12 MONTHS, was there a time when you or others in your household were unable to eat healthy and nutritious food because of a lack of money or other resources? | 1=Yes<br>0= No<br>98=Don't know<br>97=Refused | _ _ _ |
| 1303                                                                                                     | Was there a time when you or others in your household ate only a few kinds of foods because of a lack of money or other resources?                                                           | 1=Yes<br>0= No<br>98=Don't know<br>97=Refused | _ _ _ |
| 1304                                                                                                     | Was there a time when you or others in your household had to skip a meal because there was not enough money or other resources to get food?                                                  | 1=Yes<br>0= No<br>98=Don't know<br>97=Refused | _ _ _ |
| 1305                                                                                                     | Still thinking about the last 12 MONTHS, was there a time when you or others in your household ate less than you thought you should because of a lack of money or other resources?           | 1=Yes<br>0= No<br>98=Don't know<br>97=Refused | _ _ _ |
| 1306                                                                                                     | Was there a time when your household ran out of food because of a lack of money or other resources?                                                                                          | 1=Yes<br>0= No<br>98=Don't know<br>97=Refused | _ _ _ |
| 1307                                                                                                     | Was there a time when you or others in your household were hungry but did not eat because there was not enough money or other resources for food?                                            | 1=Yes<br>0= No<br>98=Don't know<br>97=Refused | _ _ _ |
| 1308                                                                                                     | Was there a time when you or others in your household went without eating for a whole day because of a lack of money or other resources?                                                     | 1=Yes<br>0= No<br>98=Don't know<br>97=Refused | _ _ _ |

## Module 14: Employment and social protection

| S.N. | Questions                                                                                                                                                                                                                                           | Response                                                                                                                                                                                                                                                                                                                                                                                                          |       |
|------|-----------------------------------------------------------------------------------------------------------------------------------------------------------------------------------------------------------------------------------------------------|-------------------------------------------------------------------------------------------------------------------------------------------------------------------------------------------------------------------------------------------------------------------------------------------------------------------------------------------------------------------------------------------------------------------|-------|
| 1401 | <p>Since last year, what has been the main livelihood or income source of the HH?</p> <p><b>(DO NOT READ LIST. PROBE FOR ONE RESPONSE)</b></p>                                                                                                      | <p>1 = Sale of self-produced horticulture crops<br/>           2 = horticulture crops Sale of self-produced field crops<br/>           3 = Own business (including commerce, livestock rearing)<br/>           4 = Wage employment<br/>           5 = Remittances<br/>           6 = Property income<br/>           7 = Government transfers/NGO support<br/>           8 = Pension<br/>           99 = Other</p> | _ _ _ |
| 1402 | <p>Since last year, have there been other livelihood or income sources for the HH?</p> <p><b>(DO NOT READ LIST. PROBE FOR ALL RESPONSES)</b></p>                                                                                                    | <p>1 = Sale of self-produced horticulture crops<br/>           2 = horticulture crops Sale of self-produced field crops<br/>           3 = Own business (including commerce, livestock rearing)<br/>           4 = Wage employment<br/>           5 = Remittances<br/>           6 = Property income<br/>           7 = Government transfers/NGO support<br/>           8 = Pension<br/>           99 = Other</p> | _ _ _ |
| 1403 | <p>Since last year, did anyone in your HH receive any kind of food or cash assistance from the government, NGO, or other agencies? <i>Clarify: This is not formal employment or pension. However, it may or may not be conditional on work.</i></p> | <p>1 = Yes<br/>           0 = No<br/>           98 = Don't know</p>                                                                                                                                                                                                                                                                                                                                               | _ _ _ |
| 1404 | <p>Since last year, which members of this HH were targeted to receive this support?</p>                                                                                                                                                             | <p>1 = All HH members<br/>           2 = Specific HH members<br/>           98 = Don't know</p>                                                                                                                                                                                                                                                                                                                   | _ _ _ |
| 1405 | <p>Which specific HH members received food or cash assistance?<br/> <i>Clarify: This includes children whose parents receive cash on their behalf.</i></p>                                                                                          | <p>Link this back to the HH roster and have interviewer select names.<br/>           98 = Don't know</p>                                                                                                                                                                                                                                                                                                          | _ _ _ |
| 1406 | <p>Which of these categories apply to the persons who received food or cash assistance?<br/> <b>(READ RESPONSES ALOUD. SELECT ALL THAT APPLY)</b></p>                                                                                               | <p>1 = Pregnant women<br/>           2 = Lactating women<br/>           3 = Children under 5 years<br/>           4 = Elderly<br/>           5 = Disabled person<br/>           6 = None of the above</p>                                                                                                                                                                                                         | _ _ _ |
| 1407 | <p>Since last year, which food or social assistance program did members of the HH receive support from? <b>(DO NOT READ LIST ALOUD. PROBE FOR ALL RESPONSES)</b></p>                                                                                | <p>1 = PSNP<br/>           2 = Community Care Coalition<br/>           3 = Other assistance program<br/>           98 = Don't know</p>                                                                                                                                                                                                                                                                            | _ _ _ |
| 1408 | <p>Since last year, what was the form of assistance that members of your HH received from these programs: food, cash or both food and cash?</p>                                                                                                     | <p>1 = Cash only transfer<br/>           2 = Food only transfer<br/>           3 = Cash and food mix<br/>           99 = Other<br/>           98 = Don't know</p>                                                                                                                                                                                                                                                 | _ _ _ |

|                       |      |                                                                                                           |                                                                                         |       |
|-----------------------|------|-----------------------------------------------------------------------------------------------------------|-----------------------------------------------------------------------------------------|-------|
| 1<br>2<br>3           | 1409 | Is this HH currently receiving food or cash?                                                              | 1 = Yes<br>0 = No<br>98 = Don't know                                                    | _ _ _ |
| 4<br>5<br>6<br>7<br>8 | 1410 | Since last year, how has your HH used the food received?<br>(READ RESPONSES ALOUD. SELECT ALL THAT APPLY) | 1 = HH consumption<br>2 = Sold food for cash<br>3 = Other activities<br>98 = Don't know |       |

For peer review only

1  
2  
3  
4  
5  
6  
7  
8  
9  
10  
11  
12  
13  
14  
15  
16  
17  
18  
19  
20  
21  
22  
23  
24  
25  
26  
27  
28  
29  
30  
31  
32  
33  
34  
35  
36  
37  
38  
39  
40  
41  
42  
43  
44  
45  
46  
47  
48  
49  
50  
51  
52  
53  
54  
55  
56  
57  
58  
59  
60

|       |                                                                                                                                                                                 |                                                                                                                                                                                                                                                                                                                                           |
|-------|---------------------------------------------------------------------------------------------------------------------------------------------------------------------------------|-------------------------------------------------------------------------------------------------------------------------------------------------------------------------------------------------------------------------------------------------------------------------------------------------------------------------------------------|
| 1501. | How do you preserve soil fertility?<br><br><b>[Multiple answer is allowed! Do not read the choices. Listen and mark the one they mention]</b>                                   | 1 = Fertilization (Chemicals, animal manure, green manure etc)<br>2 = Crop rotation (Cultivation of a series of dissimilar types of crops in the same area in sequential seasons)<br>3=Intercropping (Cultivation of two or more dissimilar types of crops in the same area in the same season)<br>4=Tillage<br>99=Other (specify): ..... |
| 1502. | Do you apply fertilizers?                                                                                                                                                       | 1= Yes<br>0= No (Go to 1506)                                                                                                                                                                                                                                                                                                              |
| 1503. | Which kinds of fertilizers do you use more often?                                                                                                                               | 1= Chemical fertilizers<br>2 = Organic fertilizers (non-chemicals like animal manure, green manure, compost, etc.) (Go to→1505)                                                                                                                                                                                                           |
| 1504. | Which chemical fertilizers are used most often, can you specify the type/name?                                                                                                  | 1 = UREA<br>2 = DAP<br>3= NPS<br>98= Don't know<br>99= Other (specify): .....                                                                                                                                                                                                                                                             |
| 1505. | Which organic fertilizers are used more often, can you specify the type?                                                                                                        | 1 = Livestock manure<br>2 = Poultry manure<br>99=Other (specify) .....                                                                                                                                                                                                                                                                    |
| 1506. | What is the most dominant cereals/crop you produce on your farm?<br><br><b>[Only one answer is allowed! Do not read the choices. Listen, mark/specify the one they mention]</b> | 1 = Wheat<br>2 = Teff<br>3 = Maize<br>99= Other (Specify): .....                                                                                                                                                                                                                                                                          |
| 1507. | How far is your agricultural land from your house?<br><br><b>[In case they own many farms, Consider only the one with the dominant crop]</b>                                    | 1= within 500 meter radius<br>2= 500 -1000 meter radius<br>3= 1000 - 3000 meter radius<br>4= More than 3000 meter                                                                                                                                                                                                                         |

**Module 15: Soil information questionnaire**

**Observational checklist for soil sampling**

For peer review only

1  
2  
3  
4  
5  
6  
7  
8  
9  
10  
11  
12  
13  
14  
15  
16  
17  
18  
19  
20  
21  
22  
23  
24  
25  
26  
27  
28  
29  
30  
31  
32  
33  
34  
35  
36  
37  
38  
39  
40  
41  
42  
43  
44  
45  
46  
47  
48  
49  
50  
51  
52  
53  
54  
55  
56  
57  
58  
59  
60



|    |     |                                                                                         |
|----|-----|-----------------------------------------------------------------------------------------|
| 1  | 1   | Region                                                                                  |
| 2  | 2   | Zone                                                                                    |
| 3  | 3   | Woreda                                                                                  |
| 4  | 4   | Kebele                                                                                  |
| 5  | 5   | Gote Code                                                                               |
| 6  | 6   | Household Code                                                                          |
| 7  | 6   | Sample code .....                                                                       |
| 8  |     |                                                                                         |
| 9  |     |                                                                                         |
| 10 |     |                                                                                         |
| 11 | 7   | <b>Crop history</b>                                                                     |
| 12 | 7.1 | Last two-year crop (Please, specify the crop harvested in 2011, growing season) .....   |
| 13 | 7.2 | Last crop (Please, specify the crop harvested from the previous growing season) .....   |
| 14 | 7.3 | Crop to be planted for the current season.....                                          |
| 15 | 7.4 | Please write the intended planting dates (Year and Month) .....,                        |
| 16 | 7.5 | When was the <b>last time</b> the agricultural field gets tilled?                       |
| 17 |     | 1 = 0 to 3 months ago                                                                   |
| 18 |     | 2 = 3 to 6 months ago                                                                   |
| 19 |     | 1 = 6 to 12 months ago                                                                  |
| 20 |     | 2 = before a year                                                                       |
| 21 |     |                                                                                         |
| 22 |     |                                                                                         |
| 23 |     |                                                                                         |
| 24 |     |                                                                                         |
| 25 |     |                                                                                         |
| 26 |     |                                                                                         |
| 27 |     |                                                                                         |
| 28 | 8   | <b>Fertilizer utilization</b>                                                           |
| 29 | 8.1 | Which fertilizer is applied                                                             |
| 30 |     | 1 = Chemical fertilizer                                                                 |
| 31 |     | 2 = Organic fertilizer ( <b>Go to 8.4</b> )                                             |
| 32 |     | 3 = Both 1&2                                                                            |
| 33 |     | 4 = Fertilizer not applied ( <b>Go to 9</b> )                                           |
| 34 | 8.2 | Which Chemical fertilizer is applied                                                    |
| 35 |     | 1 = UREA                                                                                |
| 36 |     | 2 = DAP                                                                                 |
| 37 |     | 3 = NPS                                                                                 |
| 38 |     | 4 = Other, please specify.....                                                          |
| 39 | 8.3 | Please write the last date (Year and Month) you applied chemical fertilizer?.....       |
| 40 | 8.4 | Which Organic fertilizer is applied                                                     |
| 41 |     | 1 = Animal Manure                                                                       |
| 42 |     | 2 = Green Manure                                                                        |
| 43 |     | 3 = Compost                                                                             |
| 44 |     | 4 = Other, please specify.....                                                          |
| 45 | 8.5 | Please write the <b>last date</b> (Year and Month) you applied organic fertilizer?..... |
| 46 |     |                                                                                         |
| 47 |     |                                                                                         |
| 48 |     |                                                                                         |
| 49 |     |                                                                                         |
| 50 |     |                                                                                         |
| 51 |     |                                                                                         |
| 52 |     |                                                                                         |
| 53 |     |                                                                                         |
| 54 |     |                                                                                         |
| 55 |     |                                                                                         |
| 56 |     |                                                                                         |
| 57 |     |                                                                                         |
| 58 | 9   | <b>Soil characteristics</b>                                                             |
| 59 |     |                                                                                         |
| 60 |     |                                                                                         |

|    |     |                                                                                                           |
|----|-----|-----------------------------------------------------------------------------------------------------------|
| 1  | 9.1 | Observation: What is the colour of the soil you are about to sample                                       |
| 2  |     |                                                                                                           |
| 3  |     | 1 = Dark brown/Black                                                                                      |
| 4  |     | 2 = Red                                                                                                   |
| 5  |     |                                                                                                           |
| 6  |     | 3 = Grey                                                                                                  |
| 7  |     |                                                                                                           |
| 8  |     | 4 = Other, please specify.....                                                                            |
| 9  |     |                                                                                                           |
| 10 | 9.1 | Observation: Field area landscape                                                                         |
| 11 |     | 1 = plains/level grounds                                                                                  |
| 12 |     |                                                                                                           |
| 13 |     | 2 = Sloppy/Inclined                                                                                       |
| 14 |     |                                                                                                           |
| 15 | 9.4 | Observation: Is there a standing crop on the sampling field or to the nearby farmland.                    |
| 16 |     | 1 = Yes                                                                                                   |
| 17 |     |                                                                                                           |
| 18 |     | 2 = No                                                                                                    |
| 19 |     |                                                                                                           |
| 20 | 9.3 | Observation: Is sampling field tilled/ is it being tilled at the time of sampling.                        |
| 21 |     |                                                                                                           |
| 22 |     | 1 = Yes                                                                                                   |
| 23 |     |                                                                                                           |
| 24 |     | 2 = No                                                                                                    |
| 25 |     |                                                                                                           |
| 26 | 10  | Distance of the farmland to the nearby houses                                                             |
| 27 |     | 1 = below 100meter                                                                                        |
| 28 |     |                                                                                                           |
| 29 |     | 2 = 100 to 500meter                                                                                       |
| 30 |     |                                                                                                           |
| 31 |     | 3 = 500 to 1000meter                                                                                      |
| 32 |     |                                                                                                           |
| 33 |     | 4 = More than 1000meter                                                                                   |
| 34 |     | Please take picture for the surrounding environment i.e., plot, houses, anything permanent or even moving |
| 35 |     | cattle                                                                                                    |
| 36 | 11  |                                                                                                           |
| 37 | 12  | Please capture GPS for the sampled farmland                                                               |
| 38 |     |                                                                                                           |
| 39 | 13  | Name of sample collector.....                                                                             |
| 40 |     | LIST ANY ABNORMAL CONDITIONS OR SPECIFIC INFORMATION DESIRED:                                             |
| 41 |     |                                                                                                           |
| 42 |     |                                                                                                           |
| 43 |     |                                                                                                           |
| 44 |     |                                                                                                           |
| 45 |     |                                                                                                           |
| 46 |     |                                                                                                           |
| 47 |     |                                                                                                           |
| 48 |     |                                                                                                           |
| 49 |     |                                                                                                           |
| 50 |     |                                                                                                           |
| 51 |     |                                                                                                           |
| 52 |     |                                                                                                           |
| 53 |     |                                                                                                           |
| 54 |     |                                                                                                           |
| 55 |     |                                                                                                           |
| 56 |     |                                                                                                           |
| 57 |     |                                                                                                           |
| 58 |     |                                                                                                           |
| 59 |     |                                                                                                           |
| 60 |     |                                                                                                           |

**Module 16: A Dietary assessment questionnaire**

**Note for the data collectors:** Among the household members, this module questionnaire is to be filled for the child under-five years of age and women of the reproductive age in the household.

**Part 1: Before 24-hr recall**

| 24-hour dietary recall                                                                  |                                                                          |                                                  |        |
|-----------------------------------------------------------------------------------------|--------------------------------------------------------------------------|--------------------------------------------------|--------|
| EA code  _ _ _  Household code  _ _  Line Number  _ _  Child ID  _ _                    |                                                                          |                                                  |        |
| Unique ID Woman:  _ _ _ _ _ _ _ _  Unique ID Child:  _ _ _ _ _ _ _ _ _ _ _ _            |                                                                          |                                                  |        |
| Interview Date: Date - _/ _/ _ _ Day - 01=Mon 02=Tue 03=Wed 04=Thu 05=Fri 06=Sat 07=Sun |                                                                          |                                                  |        |
| Date of food intake - _/ _/ _ _                                                         |                                                                          |                                                  |        |
|                                                                                         | Question                                                                 | Coding category                                  | skip   |
| 1.                                                                                      | Enumerator Code:                                                         | _____                                            |        |
| 2.                                                                                      | For which target group is the recall being done?                         | 0. Woman 1. Child                                |        |
| 3.                                                                                      | Recall number                                                            | 0. Recall 1<br>1. Recall 2                       |        |
| 4.                                                                                      | Name of the woman interviewed                                            | _____                                            |        |
| 5.                                                                                      | Age of the woman (in complete years)                                     | Age in years (_____)                             |        |
| 6.                                                                                      | Name of child                                                            | _____                                            |        |
| 7.                                                                                      | Date of birth (DOB): Use Ethiopian calendar                              | _ _ _ / _ _ /20 _ _                              |        |
| 8.                                                                                      | Age of the child (in complete month)                                     | _____ months                                     |        |
| 9.                                                                                      | Child's sex:                                                             | 0=Male 1= Female                                 |        |
| 10.                                                                                     | Food weighing scale number:                                              | _ _                                              |        |
| 11.                                                                                     | Was yesterday's food intake different from your usual diet?              | 1=Yes 0=No                                       | No →13 |
| 12.                                                                                     | If yes,                                                                  | 1=Holyday/celebration<br>2=I was sick<br>3=Other |        |
| 13.                                                                                     | Was [child name] yesterday's food intake different from your usual diet? | 1=Yes<br>0=No                                    | No →15 |

|                                  |                                                             |                                                  |  |
|----------------------------------|-------------------------------------------------------------|--------------------------------------------------|--|
| 1<br>2<br>3<br>4<br>5            | 14.<br>If yes,                                              | 1=Holyday/celebration<br>2=I was sick<br>3=Other |  |
| 6<br>7<br>8<br>9<br>10           | 15.<br>Did you take medicine/supplement yesterday?          | 1=Yes<br>0=No<br><i>If yes, name:</i> _____      |  |
| 11<br>12<br>13<br>14<br>15<br>16 | 16.<br>Did [child name] take medicine/supplement yesterday? | 1=Yes<br>0=No<br><i>If yes, name:</i> _____      |  |

17  
18  
19  
20  
21  
22  
23  
24  
25  
26  
27  
28  
29  
30  
31  
32  
33  
34  
35  
36  
37  
38  
39  
40  
41  
42  
43  
44  
45  
46  
47  
48  
49  
50  
51  
52  
53  
54  
55  
56  
57  
58  
59  
60

For peer review only

## Procedures to collect the required information

### 1. Pass 1: list all foods and drinks consumed during the 24-hour period.

Now I would like to ask you about the foods and drinks that [YOU/ YOUR CHILD] consumed yesterday from the time you work up until you went to sleep, sunrise yesterday to sunrise today. Please list all foods or drinks you ate, weather you ate or drank them at home or somewhere else. Please think about snacks and small meals as well as main meals.

- 1) "WHAT WAS THE FIRST THING [you/ your child] ATE YESTERDAY AFTER SUNRISE?"
- 2) "WHEN WAS THAT"
- 3) "DID [you/your child] HAVE ANYTHING WITH THAT?"
- 4) "WHAT DID [you/he/she] HAVE?"
- 5) "WHAT IS THE NEXT THING [you/ your child] ATE OR DRANK AND WHEN WAS THAT?"
- 6) REPEAT questions 3-5 until you have a full record for both DAY AND NIGHT
  - a. The reference period is from sunrise yesterday to sunrise this morning. If they wake up at a different time than sunrise, you can use the time from waking up yesterday until waking up today

### 2. Pass 2: get more detail about each food.

- 7) "NOW, PLEASE DESCRIBE EACH FOOD [you/ your child] ATE YESTERDAY"
- 8) "WHAT TYPE WAS IT?"
- 9) "WHERE DID YOU GET IT?"
- 10) "WHAT ARE THE INGREDIENTS?"
  - a. Use standard "probes" (probing questions) to get these details for each food.
- 11) "HOW MUCH DID THIS RECIPE MAKE?" or "WHAT WAS THE TOTAL AMOUNT THIS MADE?"
- 12) "HOW WAS The Recipe PREPARED?"
  - a. Identify the cooking methods used (particularly if raw, fermented, or fried in oil).

### 3. Pass 3: estimate the amount consumed of each food on the list

- 13) "HOW MUCH OF [name the first food] DID [you/ your child] CONSUME?"
  - a. Help the mother remember and **estimate the amount** of each food or recipe that her child ate and that she herself ate.
- 14) "WAS ANY LEFT OVER?"
  - a. If any food is leftover from what the mother served to the child, enter that amount.
- 15) "PLEASE HELP ME ESTIMATE THE AMOUNT OF FOOD YOU ARE OR USED IN THE RECIPE"

Use following portion size estimation method to estimate the amount of food/ingredient eaten or used in a recipe 1. Direct weight (g) 2.Proxy weight (g) 3. Water (g) 4. Number 5. Other (specify).

### 4. Pass 4: verify everything consumed

- a. Quickly read the information back to the respondent, "HAVE I FORGOTTEN TO ADD ANYTHING?"



1  
2  
3  
4  
5  
6  
7  
8  
9  
10  
11  
12  
13  
14  
15  
16  
17  
18  
19  
20  
21  
22  
23  
24  
25  
26  
27  
28  
29  
30  
31  
32  
33  
34  
35  
36  
37  
38  
39  
40  
41  
42  
43  
44  
45  
46  
47  
48  
49  
50  
51  
52  
53  
54  
55  
56  
57  
58  
59  
60

For peer review only

| Food No. | What was the first thing [YOU/ YOUR CHILD] ate or drank after sunrise yesterday? Any else? | Time of meal | Please describe this food / beverage/ ingredient: | How was this prepared ? | Place of preparation | How was the food / Ing. measured | Amount served | Amount left over | Amount eaten | Recipe information       |                              |                                 |                       |
|----------|--------------------------------------------------------------------------------------------|--------------|---------------------------------------------------|-------------------------|----------------------|----------------------------------|---------------|------------------|--------------|--------------------------|------------------------------|---------------------------------|-----------------------|
|          |                                                                                            |              |                                                   |                         |                      |                                  |               |                  |              | State of each ingredient | Cooking method of the recipe | Total amount of recipe measured | Links to food/ recipe |
| 1        |                                                                                            |              |                                                   |                         |                      |                                  |               |                  |              |                          |                              |                                 |                       |
|          | Ingredient:                                                                                |              | Description                                       |                         |                      |                                  |               |                  |              |                          |                              |                                 |                       |
|          |                                                                                            |              |                                                   |                         | NA                   |                                  |               |                  |              |                          |                              |                                 |                       |
|          |                                                                                            |              |                                                   |                         | NA                   |                                  |               |                  |              |                          |                              |                                 |                       |
|          |                                                                                            |              |                                                   |                         | NA                   |                                  |               |                  |              |                          |                              |                                 |                       |
|          |                                                                                            |              |                                                   |                         | NA                   |                                  |               |                  |              |                          |                              |                                 |                       |
|          |                                                                                            |              |                                                   |                         | NA                   |                                  |               |                  |              |                          |                              |                                 |                       |
| 2        |                                                                                            |              |                                                   |                         |                      |                                  |               |                  |              |                          |                              |                                 |                       |
|          |                                                                                            |              |                                                   |                         | NA                   |                                  |               |                  |              |                          |                              |                                 |                       |
|          |                                                                                            |              |                                                   |                         | NA                   |                                  |               |                  |              |                          |                              |                                 |                       |
|          |                                                                                            |              |                                                   |                         | NA                   |                                  |               |                  |              |                          |                              |                                 |                       |
|          |                                                                                            |              |                                                   |                         | NA                   |                                  |               |                  |              |                          |                              |                                 |                       |
|          |                                                                                            |              |                                                   |                         | NA                   |                                  |               |                  |              |                          |                              |                                 |                       |
| 3        |                                                                                            |              |                                                   |                         |                      |                                  |               |                  |              |                          |                              |                                 |                       |
|          |                                                                                            |              |                                                   |                         | NA                   |                                  |               |                  |              |                          |                              |                                 |                       |
|          |                                                                                            |              |                                                   |                         | NA                   |                                  |               |                  |              |                          |                              |                                 |                       |
|          |                                                                                            |              |                                                   |                         | NA                   |                                  |               |                  |              |                          |                              |                                 |                       |
|          |                                                                                            |              |                                                   |                         | NA                   |                                  |               |                  |              |                          |                              |                                 |                       |

**Time of meal:** 1. Early morning 2. Mid-Morning 3. Noon 4. Afternoon 5. Evening 6. Late evening

**Place of preparation:** 1. Home 2. Outside home

**How was it prepared:** 1=raw/ no change/ as purchased; 2=fermented; 3=fried; 04=cooked or boiled – wet heat; 5=baked/ grilled/ broiled – dry heat; 6=local miller; 7=blanched (dipped in boiling water); 8=other

For peer review only - <http://bmjopen.bmj.com/site/about/guidelines.xhtml>



1  
2  
3  
4  
5  
6  
7  
8  
9  
10  
11  
12  
13  
14  
15  
16  
17  
18  
19  
20  
21  
22  
23  
24  
25  
26  
27  
28  
29  
30  
31  
32  
33  
34  
35  
36  
37  
38  
39  
40  
41  
42  
43  
44  
45  
46

| Food No. | What was the first thing [YOU/ YOUR CHILD] ate or drank after sunrise yesterday? Any else? | Time of meal | Please describe this food / beverage/ ingredient: | How was this prepared ? | Place of preparation | How was the food / Ing. measured | Amount served | Amount left over | Amount eaten | Recipe information       |                              |                                 |                        |
|----------|--------------------------------------------------------------------------------------------|--------------|---------------------------------------------------|-------------------------|----------------------|----------------------------------|---------------|------------------|--------------|--------------------------|------------------------------|---------------------------------|------------------------|
|          |                                                                                            |              |                                                   |                         |                      |                                  |               |                  |              | State of each ingredient | Cooking method of the recipe | Total amount of recipe measured | Links to food/ recipes |
| 1        |                                                                                            |              |                                                   |                         |                      |                                  |               |                  |              |                          |                              |                                 |                        |
|          | Ingredient:                                                                                |              | Description                                       |                         |                      |                                  |               |                  |              |                          |                              |                                 |                        |
|          |                                                                                            |              |                                                   |                         | NA                   |                                  |               |                  |              |                          |                              |                                 |                        |
|          |                                                                                            |              |                                                   |                         | NA                   |                                  |               |                  |              |                          |                              |                                 |                        |
|          |                                                                                            |              |                                                   |                         | NA                   |                                  |               |                  |              |                          |                              |                                 |                        |
|          |                                                                                            |              |                                                   |                         | NA                   |                                  |               |                  |              |                          |                              |                                 |                        |
|          |                                                                                            |              |                                                   |                         | NA                   |                                  |               |                  |              |                          |                              |                                 |                        |
| 2        |                                                                                            |              |                                                   |                         |                      |                                  |               |                  |              |                          |                              |                                 |                        |
|          |                                                                                            |              |                                                   |                         | NA                   |                                  |               |                  |              |                          |                              |                                 |                        |
|          |                                                                                            |              |                                                   |                         | NA                   |                                  |               |                  |              |                          |                              |                                 |                        |
|          |                                                                                            |              |                                                   |                         | NA                   |                                  |               |                  |              |                          |                              |                                 |                        |
|          |                                                                                            |              |                                                   |                         | NA                   |                                  |               |                  |              |                          |                              |                                 |                        |
|          |                                                                                            |              |                                                   |                         | NA                   |                                  |               |                  |              |                          |                              |                                 |                        |
| 3        |                                                                                            |              |                                                   |                         |                      |                                  |               |                  |              |                          |                              |                                 |                        |
|          |                                                                                            |              |                                                   |                         | NA                   |                                  |               |                  |              |                          |                              |                                 |                        |
|          |                                                                                            |              |                                                   |                         | NA                   |                                  |               |                  |              |                          |                              |                                 |                        |
|          |                                                                                            |              |                                                   |                         | NA                   |                                  |               |                  |              |                          |                              |                                 |                        |
|          |                                                                                            |              |                                                   |                         | NA                   |                                  |               |                  |              |                          |                              |                                 |                        |

|  | What was the first | Time of | Please describe this food / | How was | Place of | I o | A m | A m | A m | Recipe information |  |  |
|--|--------------------|---------|-----------------------------|---------|----------|-----|-----|-----|-----|--------------------|--|--|
|  |                    |         |                             |         | NA       |     |     |     |     |                    |  |  |

**Time of meal:** 1. Early morning 2. Mid-Morning 3. Noon 4. Afternoon 5. Evening 6. Late evening

**Place of preparation:** 1. Home 2. Outside home

**How was it prepared:** 1=raw/ no change/ as purchased; 2=fermented; 3=fried; 04=cooked or boiled – wet heat; 5=baked/ grilled/ broiled – dry heat; 6=local miller; 7=blanched (dipped in boiling water); 8=other

For peer review only

1 **Module 17: Biomarkers collection tools**

2

3

4 **PRESCHOOL AGE CHILDREN (6-59 MONTHS)**

5 **ETHIOPIAN FOOD AND NUTRITION STRATEGY BASELINE SURVEY 2020/21**

6 **Biochemical and Health Related Data Collection Tool**

7

| IDENTIFICATION                                                                                          |                                                                                      |
|---------------------------------------------------------------------------------------------------------|--------------------------------------------------------------------------------------|
| HH00. CLUSTER (EA) NAME.....                                                                            | HH01. CLUSTER NUMBER: <input type="text"/> <input type="text"/> <input type="text"/> |
| HH02. HH NUMBER: <input type="text"/> <input type="text"/>                                              | HH03. RESIDENCE (RURAL=1, URBAN=2): <input type="text"/> <input type="text"/>        |
| HH04. RESPONDENT LINE NUMBER:<br>(SHOULD BE MOTHER/CAREGIVER) <input type="text"/> <input type="text"/> | HH05 CHILD LINE NUMBER <input type="text"/> <input type="text"/>                     |
| HH06. INTERVIEWER NAME _____<br>CODE: _____                                                             | HH07. TEAM LEADER, NAME: _____<br>CODE: _____                                        |
| HH08. SUPERVISOR NAME: _____<br>CODE. _____                                                             |                                                                                      |

25

26

27 **PRESCHOOL CHILDREN 6-59 MONTHS OLD**

28

29 **PART I: CHILD HEALTH QUESTIONS**

30 I would like to ask you some health and food questions about your child. Fill or Circle the correct answer

31

32

33

| S.N | Questions                                                                                                                                                                                                      | Response                                                                                                       | SKIP |
|-----|----------------------------------------------------------------------------------------------------------------------------------------------------------------------------------------------------------------|----------------------------------------------------------------------------------------------------------------|------|
| 1   | <p><b>What is the birth date of the child? In day/month/ year (How many months old is this child?)</b></p> <p>NOTE FOR INTERVIEWERS<br/>(Screening question to verify that the date of birth of the child)</p> | <p>Birth Date: _____</p> <p>(Day/Month/Year)</p> <p>Age in months <input type="text"/><input type="text"/></p> |      |
| 2   | <p><b>Has (child's name) been diagnosed with anemia in the past 6 months?</b></p>                                                                                                                              | <p>No.....0</p> <p>Yes .....1</p> <p>Don't know.....98</p>                                                     |      |

34

35

36

37

38

39

40

41

42

43

44

45

46

47

48

49

50

51

52

53

54

55

56

57

58

59

60

**PART II: CHILD BIOCHEMICAL MEASUREMENT**

|                                                                                                                                                                                                                                                                                                                                                                                                                                                                   |                                                                                               |
|-------------------------------------------------------------------------------------------------------------------------------------------------------------------------------------------------------------------------------------------------------------------------------------------------------------------------------------------------------------------------------------------------------------------------------------------------------------------|-----------------------------------------------------------------------------------------------|
| Consent given for: <b>PL01</b> Blood <input type="checkbox"/> <b>PL02</b> Stool <input type="checkbox"/><br>(Y OR N)                                                                                                                                                                                                                                                                                                                                              |                                                                                               |
| <b>PL03</b> Code for Laboratory Technician: <input type="text"/> <input type="text"/>                                                                                                                                                                                                                                                                                                                                                                             | Lab Tech Name _____                                                                           |
| <b>PL04</b> BLUE TOP TUBE (METAL FREE)<br>Not collected = 00.0 Refused = 77.7                                                                                                                                                                                                                                                                                                                                                                                     | ML. <input type="text"/> <input type="text"/> ● <input type="text"/>                          |
| <b>PL05</b> PURPLE TOP TUBE (EDTA)<br>Not collected = 00.0<br>Refused = 77.7                                                                                                                                                                                                                                                                                                                                                                                      | ML. <input type="text"/> <input type="text"/> ● <input type="text"/>                          |
| <b>PL06</b> RED TOP TUBE (EDTA)<br>Not collected = 00.0<br>Refused = 77.7                                                                                                                                                                                                                                                                                                                                                                                         | ML. <input type="text"/> <input type="text"/> ● <input type="text"/>                          |
| <b>PL07</b> Date blood sample taken (Ethiopian<br>Day/Month/Year)                                                                                                                                                                                                                                                                                                                                                                                                 | Date: ____/____/____<br>Day / Month / Year                                                    |
| <b>PL08</b> TIME BLOOD DRAW (Ethiopian time)                                                                                                                                                                                                                                                                                                                                                                                                                      | Blood draw ____ : ____ Hour Minute                                                            |
| <b>PL09</b> When did you eat your most recent meal (food)?<br>(Ethiopian time)                                                                                                                                                                                                                                                                                                                                                                                    | ____ : ____<br>Hour Minute                                                                    |
| <b>PL10</b> MALARIA RESULTS (RDK)                                                                                                                                                                                                                                                                                                                                                                                                                                 | NEGATIVE.....0<br>POSITIVE P FALCIPARUM .....1<br><br>Positive P VIVAX.....2<br>INVALID.....3 |
| <b>PL11</b> FEVER in last 24 HR?                                                                                                                                                                                                                                                                                                                                                                                                                                  | NO.....0<br>YES .....1                                                                        |
| <b>PL12</b> HEMOGLOBIN RESULTS                                                                                                                                                                                                                                                                                                                                                                                                                                    | g/dL <input type="text"/> <input type="text"/> ● <input type="text"/>                         |
| <b>In order to determine if you have worms in the stool, we would like to collect a stool sample from your child. If you can provide this now, we appreciate it. If not now, we can come back to pick up the sample at a later time. INSTRUCTIONS IF UNABLE TO PRODUCE AT WILL:</b><br><b>For stool:</b> We will return tomorrow to pick up your stool. We would like the freshest stool you can give us. Please use one cup to collect the first stool you pass. |                                                                                               |
| <b>PL13</b> STOOL COLLECTED?                                                                                                                                                                                                                                                                                                                                                                                                                                      | NO.....0 YES<br>.....1                                                                        |
| <b>PL14</b> Date stool sample taken (Ethiopian<br>Day/Month/Year)                                                                                                                                                                                                                                                                                                                                                                                                 | Date: ____/____/____<br>Day / Month / Year                                                    |
| <b>PL15</b> TIME: STOOL COLLECTED (Ethiopian time)                                                                                                                                                                                                                                                                                                                                                                                                                | ____ : ____                                                                                   |

|                                                                     |       |        |
|---------------------------------------------------------------------|-------|--------|
|                                                                     | Hour  | Minute |
| <b>PL16</b> TIME: STOOL PASSED, Ethiopian time (as recorded on cup) | _____ | _____  |
|                                                                     | Hour  | Minute |
| <b>PL17</b> Time Blood centrifuged (Ethiopian time)                 | _____ | _____  |
|                                                                     | Hour  | Minute |

Thank you for completing this interview.

**INTERVIEWER'S OBSERVATIONS**

TO BE FILLED IN AFTER COMPLETING INTERVIEW

COMMENTS ABOUT RESPONDENT:

---



---



---



---



---



---



---

**SCHOOL AGE CHILDREN 6-12 YEARS**  
**ETHIOPIAN FOOD AND NUTRITION STRATEGY BASELINE SURVEY 2020/21**  
**Biochemical and Health Related Data Collection Tool**

| IDENTIFICATION                                                       |                                                                |  |
|----------------------------------------------------------------------|----------------------------------------------------------------|--|
| <b>SG01.</b> CLUSTER NUMBER:                                         | <input type="text"/> <input type="text"/> <input type="text"/> |  |
| <b>SG02.</b> HH NUMBER:                                              | <input type="text"/> <input type="text"/>                      |  |
| <b>SG03.</b> RESPONDENT LINE NUMBER:<br>(SHOULD BE MOTHER/CAREGIVER) | <input type="text"/> <input type="text"/>                      |  |
| <b>SG04</b> SCHOOL CHILD LINE NUMBER                                 | <input type="text"/> <input type="text"/>                      |  |

In general, for children 6-10 years of age: get parental report (ask the questions of the caretaker and enter the child's name into the parentheses)

For children 11-12 years of age who are present and can provide information: get self-report (ask questions directly of the child and enter "you" or "yourself" into the parentheses)

**PART I: CHILD HEALTH RELATED QUESTIONS**

| No. | QUESTION                                                                                                               | CODING CATEGORIES                                  | SKIP                      |
|-----|------------------------------------------------------------------------------------------------------------------------|----------------------------------------------------|---------------------------|
| S1  | How old are you/is your child?<br><br><i>(Verify that the age is the same age as written on the household listing)</i> | <input type="text"/> <input type="text"/><br>Years |                           |
| S2  | Have you/ your child ever attended school?                                                                             | No.....<br>Yes .....                               | 00<br>01<br><b>00 →S4</b> |
| S3  | What is the highest level of school (name of child) completed?                                                         | None.....0<br>Primary .....1                       |                           |

**PART II: CHILD BIOCHEMICAL MEASUREMENT**

|                                                                                                    |                                                                                                               |
|----------------------------------------------------------------------------------------------------|---------------------------------------------------------------------------------------------------------------|
| Verbal consent given for: <b>SL01</b> Blood <b>SL02</b> Urine <b>SL03</b> Stool<br>0= No OR 1= yes | <input type="checkbox"/> <input type="checkbox"/> <input type="checkbox"/>                                    |
| <b>SL04</b> Phlebotomist Code                                                                      | <input type="text"/> <input type="text"/>                                                                     |
| <b>SL5</b> BLUE TOP TUBE (METAL FREE)<br><b>Did not work =00.0</b><br><b>Refused = 77.7</b>        | ML. <input type="text"/> <input type="text"/> <input type="checkbox"/>                                        |
| <b>SL6</b> PURPLE TOP TUBE (EDTA)<br><b>Did not work =00.0</b><br><b>Refused = 77.7</b>            | ML. <input type="text"/> <input type="text"/> <input type="checkbox"/>                                        |
| <b>SL7</b> REDTOP TUBE (EDTA)<br><b>Did not work =00.0</b><br><b>Refused = 77.7</b>                | ML. <input type="text"/> <input type="text"/> <input type="checkbox"/>                                        |
| <b>SL8</b> DATE BLOOD SAMPLE TAKEN (Ethiopian calendar)                                            | Date: ____ / ____ / ____<br>Day / Month / Year                                                                |
| <b>SL9</b> TIME BLOOD DRAW (Ethiopian time)                                                        | Blood draw ____ : ____<br>Hour Minute                                                                         |
| <b>SL10</b> When did you eat your most recent meal (food)?<br>(Ethiopian time)                     | Last Meal Eaten ____ : ____<br>Hour Minute                                                                    |
| <b>SL11</b> FEVER in last 24 HR? (Since same time yesterday)                                       | No.....00<br>Yes .....01                                                                                      |
| <b>SL12</b> MALARIA RESULTS (RDK)                                                                  | NEGATIVE.....00<br>POSITIVE P <i>falciparum</i> .....01<br>POSITIVE P <i>vivax</i> .....02<br>INVALID .....03 |

|                                                                                                                                                                                                                                                        |                                                                             |
|--------------------------------------------------------------------------------------------------------------------------------------------------------------------------------------------------------------------------------------------------------|-----------------------------------------------------------------------------|
| <p><b>SL13 HEMOGLOBIN RESULTS</b></p>                                                                                                                                                                                                                  | <p>g/dL <input type="text"/> <input type="text"/> <input type="text"/></p>  |
| <p><b>SL14</b> Is that finger prick or venous sample taken?</p>                                                                                                                                                                                        | <p>Finger prick.....00</p> <p>Venous .....01</p>                            |
| <p><b>In order to determine if you have blood in urine or worms in stool we would like to collect a urine and stool sample. If you can provide this now, we appreciate it. If not now, we can come back to pick up the sample at a later time.</b></p> |                                                                             |
| <p><b>SL15</b> Urine collected?</p>                                                                                                                                                                                                                    | <p>No.....00</p> <p>yes .....01</p>                                         |
| <p><b>SL16</b> Blood in urine RESULTS</p>                                                                                                                                                                                                              | <p>Negative.....00</p> <p>positive .....01</p>                              |
| <p><b>SL17</b> Stool collected?</p>                                                                                                                                                                                                                    | <p>No.....00</p> <p>yes.....01</p>                                          |
| <p><b>SL18</b> Date and time when stool passed by the respondent (as recorded on cup) (Ethiopian time)</p>                                                                                                                                             | <p>Date: ___/___/___ and ___ : ___</p> <p>Day / Month /Year Hour Minute</p> |
| <p><b>SL19</b> Date stool sample taken (Ethiopian calendar)</p>                                                                                                                                                                                        | <p>Date: ___/___/___</p> <p>Day / Month / Year</p>                          |
| <p><b>SL20</b> Time when stool collected from the respondent (Ethiopian time)</p>                                                                                                                                                                      | <p>___ : ___</p> <p>Hour Minute</p>                                         |
| <p><b>SL21</b> TIME BLOOD centrifuged (Ethiopian time)</p>                                                                                                                                                                                             | <p>___ : ___</p> <p>Hour Minute</p>                                         |

Thank the respondent and tell them that the lab team will be arriving later.

**INTERVIEWER'S OBSERVATIONS  
TO BE FILLED IN AFTER COMPLETING INTERVIEW**

**COMMENTS:**

---



---



---



---

**ADELESCENT GIRLS (10-19 YEARS)**  
**ETHIOPIAN FOOD AND NUTRITION STRATEGY BASELINE SURVEY 2020/21**  
**Biochemical and Health Related Data Collection Tool**

|                                                                                                                                                                                   |                                                                                                                                                                                                      |
|-----------------------------------------------------------------------------------------------------------------------------------------------------------------------------------|------------------------------------------------------------------------------------------------------------------------------------------------------------------------------------------------------|
| <b>IDENTIFICATION</b>                                                                                                                                                             |                                                                                                                                                                                                      |
| <b>HH00.</b> CLUSTER (EA) NAME.....                                                                                                                                               | <b>HH01.</b> CLUSTER NUMBER: <input style="width: 20px; height: 20px;" type="text"/> <input style="width: 20px; height: 20px;" type="text"/> <input style="width: 20px; height: 20px;" type="text"/> |
| <b>HH02.</b> HH NUMBER: <input style="width: 20px; height: 20px;" type="text"/> <input style="width: 20px; height: 20px;" type="text"/>                                           | <b>HH03.</b> RESIDENCE (RURAL=1, URBAN=2): <input style="width: 20px; height: 20px;" type="text"/> <input style="width: 20px; height: 20px;" type="text"/>                                           |
| <b>HH04.</b> RESPONDENT LINE NUMBER: (SHOULD BE MOTHER/CAREGIVER) <input style="width: 20px; height: 20px;" type="text"/> <input style="width: 20px; height: 20px;" type="text"/> | <b>HH05</b> WOMEN LINE NUMBER <input style="width: 20px; height: 20px;" type="text"/> <input style="width: 20px; height: 20px;" type="text"/>                                                        |
| <b>HH06.</b> INTERVIEWER NAME _____<br>CODE: _____                                                                                                                                | <b>HH07.</b> TEAM LEADER, NAME: _____<br>CODE: _____                                                                                                                                                 |
| <b>HH08.</b> SUPERVISOR NAME: _____<br>CODE. _____                                                                                                                                |                                                                                                                                                                                                      |

**PART I: HEALTH RELATED QUESTIONS**

I would like to ask you some health and food questions about yourself. Fill or Circle the correct answer

| No. | Question                                                                                                 | Coding categories                                             | Skip |
|-----|----------------------------------------------------------------------------------------------------------|---------------------------------------------------------------|------|
| 1   | How old are you?<br><br><i>(verify that the age is the same age as written on the household listing)</i> | <input style="width: 40px; height: 20px;" type="text"/> Years |      |
| 2   | Have you been diagnosed with anemia in the past six months?                                              | No.....0<br>Yes .....1<br>Don't know.....98                   |      |
| 3   | Do you smoke? (do not include the powder and chew type)                                                  | No.....0<br>Yes .....1                                        |      |

**PART II: ADOLESCENT BIOCHEMICAL MEASUREMENT**

|                                                                     |                                                                                                                                                                                                                                     |                                                                                |  |
|---------------------------------------------------------------------|-------------------------------------------------------------------------------------------------------------------------------------------------------------------------------------------------------------------------------------|--------------------------------------------------------------------------------|--|
| Consent given for:<br>0= No or 1= Yes                               | <b>AG01</b> Blood <input style="width: 20px; height: 20px;" type="checkbox"/>                                                                                                                                                       | <b>AGL02</b> Stool <input style="width: 20px; height: 20px;" type="checkbox"/> |  |
| <b>AG03</b> BLUE TOP TUBE (METAL FREE)<br><b>Did not work =00.0</b> | ML. <input style="width: 20px; height: 20px;" type="text"/> |                                                                                |  |



|                                        |                                                                                                                                                                                                                                                                                                                                                                                                                                                                        |                                                                                                                                                                                        |
|----------------------------------------|------------------------------------------------------------------------------------------------------------------------------------------------------------------------------------------------------------------------------------------------------------------------------------------------------------------------------------------------------------------------------------------------------------------------------------------------------------------------|----------------------------------------------------------------------------------------------------------------------------------------------------------------------------------------|
| 1<br>2<br>3<br>4<br>5                  | <b>Refused = 77.7</b>                                                                                                                                                                                                                                                                                                                                                                                                                                                  |                                                                                                                                                                                        |
| 6<br>7<br>8                            | <b>AG04 PURPLE TOP TUBE (EDTA)</b><br><b>Did not work =00.0</b><br><b>Refused = 77.7</b>                                                                                                                                                                                                                                                                                                                                                                               | ML. <input type="text"/> <input type="text"/> . <input type="text"/>                                                                                                                   |
| 9<br>10<br>11                          | <b>AG05 REDTOP TUBE (EDTA)</b><br><b>Did not work =00.0</b><br><b>Refused = 77.7</b>                                                                                                                                                                                                                                                                                                                                                                                   | ML. <input type="text"/> <input type="text"/> . <input type="text"/>                                                                                                                   |
| 12<br>13<br>14<br>15                   | <b>AG06</b> Date blood sample taken (Ethiopian calendar)                                                                                                                                                                                                                                                                                                                                                                                                               | Date: ____/____/____<br>Day / Month / Year                                                                                                                                             |
| 16<br>17<br>18                         | <b>AG07</b> TIME BLOOD DRAW (Ethiopian time)                                                                                                                                                                                                                                                                                                                                                                                                                           | Blood draw ____ : ____<br>Hour Minute                                                                                                                                                  |
| 19<br>20<br>21<br>22                   | <b>AG08</b> When did you eat your most recent meal (food)?<br>(Ethiopian date and time)                                                                                                                                                                                                                                                                                                                                                                                | ____/____/____ ____ : ____<br>Date /Month/ Year Hour Minute                                                                                                                            |
| 23<br>24<br>25                         | <b>AG09</b> Is it Finger prick or venous blood sample taken?                                                                                                                                                                                                                                                                                                                                                                                                           | 01 Finger prick<br>02 Venous                                                                                                                                                           |
| 26<br>27<br>28<br>29<br>30<br>31<br>32 | <b>AG09</b> MALARIA RESULTS (RDT)                                                                                                                                                                                                                                                                                                                                                                                                                                      | NEGATIVE..... 00<br>POSITIVE <i>P falciparum</i> ..... 01<br>POSITIVE <i>P vivax</i> ..... 02<br>POSITIVE FOR BOTH <i>P falciparum</i> and <i>P vivax</i> ..... 03<br>INVALID ..... 04 |
| 33<br>34<br>35<br>36                   | <b>AG10</b> HEMOGLOBIN RESULTS                                                                                                                                                                                                                                                                                                                                                                                                                                         | g/dL <input type="text"/> <input type="text"/> . <input type="text"/>                                                                                                                  |
| 37<br>38<br>39<br>40<br>41<br>42<br>43 | <p><b>In order to determine if you have worms in the stool we would like to collect a stool sample. If you can provide this now, we appreciate it. If not now, we can come back to pick up the sample at a later time.</b></p> <p><i>INSTRUCTIONS IF UNABLE TO PRODUCE AT WILL:</i></p> <p><b>For stool:</b> We will return tomorrow to pick up your stool. We would like the fresh stool you can give us. Please use one cup to collect the first stool you pass.</p> |                                                                                                                                                                                        |
| 44<br>45                               | <b>AG11</b> Stool collected?                                                                                                                                                                                                                                                                                                                                                                                                                                           | No.....00<br>yes .....01                                                                                                                                                               |
| 46<br>47<br>48<br>49                   | <b>AG12</b> Date stool sample taken (Ethiopian calendar)                                                                                                                                                                                                                                                                                                                                                                                                               | Date: ____/____/____<br>Day / Month / Year                                                                                                                                             |
| 50<br>51<br>52                         | <b>AG13</b> Time when stool passed by the respondent (as recorded on cup)<br>(Ethiopian time)                                                                                                                                                                                                                                                                                                                                                                          | ____ : ____<br>Hour Minute                                                                                                                                                             |
| 53<br>54<br>55<br>56                   | <b>AG14</b> Time when stool collected from the respondent (Ethiopian time)                                                                                                                                                                                                                                                                                                                                                                                             | ____ : ____                                                                                                                                                                            |

|                                                     |      |        |
|-----------------------------------------------------|------|--------|
|                                                     | Hour | Minute |
| <b>AG15</b> TIME BLOOD centrifuged (Ethiopian time) |      |        |
|                                                     | Hour | Minute |

**OBSERVATIONS  
TO BE FILLED IN AFTER COMPLETING INTERVIEW**

**COMMENTS:**

---



---



---

**WOMEN OF REPRODUCTIVE AGE 15-49 YEAR OLDS  
ETHIOPIAN FOOD AND NUTRITION STRATEGY BASELINE SURVEY 2020/21  
Biochemical and Health Related Data Collection Tool**

|                                                                                                             |                                                                                             |
|-------------------------------------------------------------------------------------------------------------|---------------------------------------------------------------------------------------------|
| <b>IDENTIFICATION</b>                                                                                       |                                                                                             |
| <b>HH00.</b> CLUSTER (EA) NAME.....                                                                         | <b>HH01.</b> CLUSTER NUMBER: <input type="text"/> <input type="text"/> <input type="text"/> |
| <b>HH02.</b> HH NUMBER: <input type="text"/> <input type="text"/>                                           | <b>HH03.</b> RESIDENCE (RURAL=1, URBAN=2): <input type="text"/> <input type="text"/>        |
| <b>HH04.</b> RESPONDENT LINE NUMBER: (SHOULD BE MOTHER/CAREGIVER) <input type="text"/> <input type="text"/> | <b>HH05</b> WOMEN LINE NUMBER <input type="text"/> <input type="text"/>                     |
| <b>HH06.</b> INTERVIEWER NAME _____<br>CODE: _____                                                          | <b>HH07.</b> TEAM LEADER, NAME: _____<br>CODE: _____                                        |
| <b>HH08.</b> SUPERVISOR NAME: _____<br>CODE: _____                                                          |                                                                                             |

**PART I: HEALTH RELATED QUESTIONS**

| S.N                                                                                                         | QUESTION                                                                                                 | Response                                           | SKIP |
|-------------------------------------------------------------------------------------------------------------|----------------------------------------------------------------------------------------------------------|----------------------------------------------------|------|
| 1                                                                                                           | How old are you?<br><br><i>(verify that the age is the same age as written on the household listing)</i> | <input type="text"/> <input type="text"/><br>Years |      |
| Now I would like to ask you some questions about your health. I will first ask you about the last 6 months. |                                                                                                          |                                                    |      |
| 2                                                                                                           | Have you been diagnosed with anemia in the past six months?                                              | No.....0                                           |      |

|   |                                                                                                                                                            |                                                 |  |
|---|------------------------------------------------------------------------------------------------------------------------------------------------------------|-------------------------------------------------|--|
|   |                                                                                                                                                            | Yes .....1<br>Don't know.....98                 |  |
| 2 | Have you been ill with malaria in the past 2 weeks?                                                                                                        | No.....0<br><br>Yes .....1<br>Don't know.....98 |  |
| 3 | Do you smoke? (do not include the powder and chew type)                                                                                                    | No.....0<br><br>Yes .....1                      |  |
| 4 | Are you currently lactating?                                                                                                                               | No.....0<br><br>Yes .....1                      |  |
| 5 | During that last pregnancy (that resulted in a live birth) did you have difficulty with your vision at night ("Dafent" night blindness in local language)? | No.....0<br><br>Yes .....1<br>Don't know.....98 |  |
| 6 | In the first two months after delivery, did you receive a vitamin A dose (like this)?<br><br><i>SHOW THE CAPSULE</i>                                       | No.....0<br><br>Yes .....1<br>Don't know.....98 |  |

### **PART II: WOMEN BIOCHEMICAL MEASUREMENT**

|                                                                                                                       |                                                                                         |
|-----------------------------------------------------------------------------------------------------------------------|-----------------------------------------------------------------------------------------|
| <b>If the women is pregnant do not collect venous blood</b>                                                           |                                                                                         |
| Consent given for:                                                                                                    | <b>WL01</b> Blood <b>WL02</b> Urine <b>WL03</b> Stool                                   |
| 0= No or 1= Yes                                                                                                       | <input type="checkbox"/> <input type="checkbox"/> <input type="checkbox"/>              |
| <b>WL4</b> BLUE TOP TUBE (METAL FREE)<br><b>Did not work =00.0</b><br><b>Refused = 77.7</b><br><b>Pregnant = 99.9</b> | ML. <input type="text"/> <input type="text"/> <input type="text"/> <input type="text"/> |
| <b>WL5</b> PURPLE TOP TUBE (EDTA)<br><b>Did not work =00.0</b><br><b>Refused = 77.7</b><br><b>Pregnant = 99.9</b>     | ML. <input type="text"/> <input type="text"/> <input type="text"/> <input type="text"/> |
| <b>WL6</b> REDTOP TUBE (EDTA)<br><b>Did not work =00.0</b><br><b>Refused = 77.7</b><br><b>Pregnant = 99.9</b>         | ML. <input type="text"/> <input type="text"/> <input type="text"/> <input type="text"/> |
| <b>WL7</b> Date blood sample taken (Ethiopian calendar)                                                               | Date: ____/____/____                                                                    |

|                                                                                                                                                                                                                                                                                                                                                                                                                                                                                                                                                                                |                                                                                                                                                                                        |
|--------------------------------------------------------------------------------------------------------------------------------------------------------------------------------------------------------------------------------------------------------------------------------------------------------------------------------------------------------------------------------------------------------------------------------------------------------------------------------------------------------------------------------------------------------------------------------|----------------------------------------------------------------------------------------------------------------------------------------------------------------------------------------|
|                                                                                                                                                                                                                                                                                                                                                                                                                                                                                                                                                                                | Day / Month / Year                                                                                                                                                                     |
| <b>WL8</b> TIME BLOOD DRAW (Ethiopian time)                                                                                                                                                                                                                                                                                                                                                                                                                                                                                                                                    | Blood draw ____ : ____<br>Hour Minute                                                                                                                                                  |
| <b>WL9</b> When did you eat your most recent meal (food)?<br>(Ethiopian date and time)                                                                                                                                                                                                                                                                                                                                                                                                                                                                                         | ____ / ____ / ____ : ____<br>Date /Month/ Year Hour Minute                                                                                                                             |
| <b>WL 10</b> Finger prick or venous sample taken?                                                                                                                                                                                                                                                                                                                                                                                                                                                                                                                              | 01 Finger prick<br>02 Venous                                                                                                                                                           |
| <b>WL11</b> MALARIA RESULTS (RDT)                                                                                                                                                                                                                                                                                                                                                                                                                                                                                                                                              | NEGATIVE..... 00<br>POSITIVE P <i>falciparum</i> ..... 01<br>POSITIVE P <i>vivax</i> ..... 02<br>POSITIVE FOR BOTH P <i>falciparum</i> and P <i>vivax</i> ..... 03<br>INVALID ..... 04 |
| <b>WL12</b> HEMOGLOBIN RESULTS                                                                                                                                                                                                                                                                                                                                                                                                                                                                                                                                                 | g/dL <input type="text"/> <input type="text"/> <input type="text"/>                                                                                                                    |
| <p><b>In order to determine if you have blood in the urine or worms in the stool we would like to collect a urine and stool sample. If you can provide this now, we appreciate it. If not now, we can come back to pick up the sample at a later time.</b></p> <p><i>INSTRUCTIONS IF UNABLE TO PRODUCE AT WILL:</i></p> <p><b>For stool:</b> We will return tomorrow to pick up your stool. We would like the fresh stool you can give us. Please use one cup to collect the first stool you pass.</p> <p><b>For urine:</b> We will return tomorrow to pick up your urine.</p> |                                                                                                                                                                                        |
| <b>WL13</b> Urine collected?                                                                                                                                                                                                                                                                                                                                                                                                                                                                                                                                                   | No.....0<br>yes .....01                                                                                                                                                                |
| <b>WL14</b> RESULTS (blood in urine)<br><b>Ask the women if she is Menstruating</b><br>(Don't test if the women is in Menstruation)                                                                                                                                                                                                                                                                                                                                                                                                                                            | Negative.....00<br>positive .....01<br>Women is Menstruating.....03                                                                                                                    |
| <b>WL15</b> Stool collected?                                                                                                                                                                                                                                                                                                                                                                                                                                                                                                                                                   | No.....00<br>yes .....01                                                                                                                                                               |
| <b>WL16</b> Date stool sample taken (Ethiopian calendar)                                                                                                                                                                                                                                                                                                                                                                                                                                                                                                                       | Date: ____ / ____ / ____<br>Day / Month / Year                                                                                                                                         |
| <b>WL17</b> Time when stool passed by the respondent (as recorded on cup) (Ethiopian time)                                                                                                                                                                                                                                                                                                                                                                                                                                                                                     | ____ : ____<br>Hour Minute                                                                                                                                                             |
| <b>WL18</b> Time when stool collected from the respondent (Ethiopian time)                                                                                                                                                                                                                                                                                                                                                                                                                                                                                                     | ____ : ____                                                                                                                                                                            |

1  
2  
3  
4  
5  
6  
7  
8  
9  
10  
11  
12  
13  
14  
15  
16  
17  
18  
19  
20  
21  
22  
23  
24  
25  
26  
27  
28  
29  
30  
31  
32  
33  
34  
35  
36  
37  
38  
39  
40  
41  
42  
43  
44  
45  
46  
47  
48  
49  
50  
51  
52  
53  
54  
55  
56  
57  
58  
59  
60

|                                                     |       |        |
|-----------------------------------------------------|-------|--------|
|                                                     | Hour  | Minute |
| <b>WL19 TIME BLOOD centrifuged (Ethiopian time)</b> | _____ | _____  |
|                                                     | Hour  | Minute |

**OBSERVATIONS**  
**TO BE FILLED IN AFTER COMPLETING INTERVIEW**

**COMMENTS:**

---



---



---



---

For peer review only

## Supplementary consent 1

### 1. Informed Consent Form for Household Head

#### Ethiopian Food and Nutrition Strategy (FNS) Baseline Survey

**Investigator(s):** Dr.Masresha Tessema (PI), Meseret W/Yohannes, Dr. Meron Girma, Alemnesh Petros, Dr Aregash Samuel, Arnaud Laillou, Stanley Chitekwe, Kaleab Baye, Ramadhani Noor, Anne Sophie Donze and other co-authors

You are being invited to take part in this research because you are head of household. There are about [16596] households taking part in this research. We will ask you about household characteristics, and socio-economic status of your household. We will also assess dietary intake, anthropometric status, nutrition sensitive and specific indicators and micronutrient status of your household member.

#### Box 1. Taking part in this research is voluntary

You **can refuse** to take part in this study.

You **can withdraw** your participation from the study at any time

#### Information related to the study

The FNS baseline survey will be conducted in the 12 regions of Ethiopia. The study population will be children age 0-59 months having caregivers/mothers, school-age children (6-12 years), adolescent girls (10-19 years), reproductive-age women (15-49 years), pregnant and lactating women, and household head. The indicators that will be collected for the survey will be dietary intake, anthropometric status, nutrition sensitive and specific indicators and micronutrient status.

**The expected possible adverse effects:** there is no adverse effect by participating in this study

**The objective of this research:** to produce information on anthropometric status, dietary intakes, and micronutrient status of different population groups in Ethiopia, and assess the coverage of direct and indirect nutrition interventions.

|                                                                                                           |                                                                                                        |
|-----------------------------------------------------------------------------------------------------------|--------------------------------------------------------------------------------------------------------|
| <b>Study design:</b> A population-based, cross-sectional design                                           |                                                                                                        |
| <b>The schedule of the study:</b> The study will be conducted from July, 2021 to April, 2023              |                                                                                                        |
| <b>Foreseeable risks and expected benefits arising from participation in the study</b>                    |                                                                                                        |
| <b>Foreseeable risks</b>                                                                                  | <b>Expected benefits</b>                                                                               |
| Risks to study participants for involvement in the coverage survey are low. There may be risks associated | The findings of the study will help the ministry of health and other stakeholders engaged in nutrition |

|                                                                                                                       |                                                                                                 |
|-----------------------------------------------------------------------------------------------------------------------|-------------------------------------------------------------------------------------------------|
| with COVID pandemic. Interviewers will be trained to minimize this risk and will use appropriate prevention measures. | to improve and/or design appropriate health and nutrition intervention programs in the country. |
|-----------------------------------------------------------------------------------------------------------------------|-------------------------------------------------------------------------------------------------|

### Occurrences that may take place during the study period

| Occurrences                             | How to manage                                                                                                                               |
|-----------------------------------------|---------------------------------------------------------------------------------------------------------------------------------------------|
| Withdrawal of volunteers from the study | In such a case, we would respect the volunteer's decision to withdraw and also get a clear understanding of the reason for their withdrawal |

At the end of the study, you will not be receiving any financial benefits, but will get your results for height, weight, mid upper arm and waist circumference measurements, anemia and goiter status for time you spent and participation.

All data collected from the study will be kept confidential. If you have any questions related to the study you may contact directly Dr. Masresha Tessema who is the project PI.

#### The contact persons

1. Dr. Masresha Tessema Tel. [+251 919782082] E-mail: [masresha88@gmail.com] or
2. [Mr. Ibrahim Kedir] Tel. [+251 911957161] EPHI's IRB

### Certificate of Consent

|                                                                                                                                                                                                             |                                                                                                                                                                                                |
|-------------------------------------------------------------------------------------------------------------------------------------------------------------------------------------------------------------|------------------------------------------------------------------------------------------------------------------------------------------------------------------------------------------------|
| I have read the foregoing information. I have an opportunity to ask questions and all my questions have been answered to my satisfaction. I volunteer to give consent to participate in this research study | I confirm that the participant was given an opportunity to ask questions about the study and all questions have been answered correctly. I confirm that the consent has been given voluntarily |
| _____                                                                                                                                                                                                       | _____                                                                                                                                                                                          |
| Printed name of the participant                                                                                                                                                                             | Printed name of the person taking the consent                                                                                                                                                  |
| _____                                                                                                                                                                                                       | _____                                                                                                                                                                                          |
| Signature of the participant                                                                                                                                                                                | Signature of the person taking the consent                                                                                                                                                     |
| Date _____                                                                                                                                                                                                  | Date _____                                                                                                                                                                                     |
| day/month/year                                                                                                                                                                                              | day/month/year                                                                                                                                                                                 |

## 2. Informed Consent Form for Women of Reproductive Age

### Ethiopian Food and Nutrition Strategy (FNS) Baseline Survey

**Investigator(s):** Dr.Masresha Tessema (PI), Meseret W/Yohannes, Dr. Meron Girma, Alemnesh Petros, Dr Aregash Samuel, Arnaud Laillou, Stanley Chitekwe, Kaleab Baye, Ramadhani Noor, Anne Sophie Donze and other co-authors

You are being invited to take part in this research because you are women of reproductive age. There are [16596] households taking part in this research. We will assess your dietary intake, anthropometric status, nutrition sensitive and specific indicators and micronutrient status

#### Box 1. Taking part in this research is voluntary

You can refuse to take part in this study.

You can withdraw your participation from the study at any time

#### Information related to the study

The FNS baseline survey will be conducted in the 12 regions of Ethiopia. The study population will be children age 0-59 months having caregivers/mothers, school-age children (6-12 years), adolescent girls (10-19 years), reproductive-age women (15-49 years), pregnant and lactating women, and household head. The indicators that will be collected for the survey will be dietary intake, anthropometric status, nutrition sensitive and specific indicators and micronutrient status.

**The expected possible adverse effects:** there is no adverse effect by participating in this study

**The objective of this research:** to produce information on anthropometric status, dietary intakes, and micronutrient status of different population groups in Ethiopia, and assess the coverage of direct and indirect nutrition interventions.

|                                                                                                                                                                                                                                 |                                                                                                                                                                                                        |
|---------------------------------------------------------------------------------------------------------------------------------------------------------------------------------------------------------------------------------|--------------------------------------------------------------------------------------------------------------------------------------------------------------------------------------------------------|
| <b>Study design:</b> A population-based, cross-sectional design                                                                                                                                                                 |                                                                                                                                                                                                        |
| <b>The schedule of the study:</b> The study will be conducted from July, 2021 to April, 2023                                                                                                                                    |                                                                                                                                                                                                        |
| <b>Foreseeable risks and expected benefits arising from participation in the study</b>                                                                                                                                          |                                                                                                                                                                                                        |
| <b>Foreseeable risks</b>                                                                                                                                                                                                        | <b>Expected benefits</b>                                                                                                                                                                               |
| Risks to study participants for involvement in the coverage survey are low. There may be risks associated with COVID pandemic. Interviewers will be trained to minimize this risk and will use appropriate prevention measures. | The findings of the study will help the ministry of health and other stakeholders engaged in nutrition to improve and/or design appropriate health and nutrition intervention programs in the country. |



| <b>Occurrences that may take place during the study period</b> |                                                                                                                                             |
|----------------------------------------------------------------|---------------------------------------------------------------------------------------------------------------------------------------------|
| <b>Occurrences</b>                                             | <b>How to manage</b>                                                                                                                        |
| Withdrawal of volunteers from the study                        | In such a case, we would respect the volunteer's decision to withdraw and also get a clear understanding of the reason for their withdrawal |

At the end of the study, you will not be receiving any financial benefits, but will get your results for height, weight, mid upper arm and waist circumference measurements, anemia and goiter status for time you spent and participation.

All data collected from the study will be kept confidential. If you have any questions related to the study you may contact directly Dr. Masresha Tessema who is the project PI.

#### **The contact persons**

1. Dr. Masresha Tessema Tel. [+251 919782082] E-mail: [masresha88@gmail.com] or
2. [Mr. Ibrahim Kedir] Tel. [+251 911957161] EPHI's IRB

#### **Certificate of Consent**

I have read the foregoing information. I have an opportunity to ask questions and all my questions have been answered to my satisfaction. I volunteer to give consent to participate in this research study

\_\_\_\_\_  
Printed name of the participant

\_\_\_\_\_  
Signature of the participant

Date \_\_\_\_\_  
day/month/year

I confirm that the participant was given an opportunity to ask questions about the study and all questions have been answered correctly. I confirm that the consent has been given voluntarily

\_\_\_\_\_  
Printed name of the person taking the consent

\_\_\_\_\_  
Signature of the person taking the consent

Date \_\_\_\_\_  
day/month/year

### 3. Informed Consent Form for Pregnant Women

#### Ethiopian Food and Nutrition Strategy (FNS) Baseline Survey

**Investigator(s):** Dr.Masresha Tessema (PI), Meseret W/Yohannes, Dr. Meron Girma, Alemnesh Petros, Dr Aregash Samuel, Arnaud Laillou, Stanley Chitekwe, Kaleab Baye, Ramadhani Noor, Anne Sophie Donze and other co-authors

You are being invited to take part in this research because you are pregnant women. There are [16596] households taking part in this research. We will assess your, anthropometric status, nutrition sensitive and specific indicators and anemia status

#### Box 1. Taking part in this research is voluntary

You **can refuse** to take part in this study.

You **can withdraw** your participation from the study at any time

#### Information related to the study

The FNS baseline survey will be conducted in the 12 regions of Ethiopia. The study population will be children age 0-59 months having caregivers/mothers, school-age children (6-12 years), adolescent girls (10-19 years), reproductive-age women (15-49 years), pregnant and lactating women, and household head. The indicators that will be collected for the survey will be dietary intake, anthropometric status, nutrition sensitive and specific indicators and micronutrient status.

**The expected possible adverse effects:** There is no adverse effect by participating in this study

**The objective of this research:** to produce information on anthropometric status, dietary intakes, and micronutrient status of different population groups in Ethiopia, and assess the coverage of direct and indirect nutrition interventions.

**Study design:** a population-based, cross-sectional design

**The schedule of the study:** The study will be conducted from July, 2021 to April, 2023

#### Foreseeable risks and expected benefits arising from participation in the study

##### Foreseeable risks

Risks to study participants for involvement in the coverage survey are low. There may be risks associated with COVID pandemic. Interviewers will be trained to minimize this risk and will use appropriate prevention measures.

##### Expected benefits

The findings of the study will help the ministry of health and other stakeholder engaged in nutrition to improve and/or design appropriate health and nutrition intervention programs in the country.

#### Occurrences that may take place during the study period

| Occurrences                             | How to manage                                                                                                                               |
|-----------------------------------------|---------------------------------------------------------------------------------------------------------------------------------------------|
| Withdrawal of volunteers from the study | In such a case, we would respect the volunteer's decision to withdraw and also get a clear understanding of the reason for their withdrawal |

At the end of the study, you will not be receiving any financial benefits, but will get your results for height, weight, mid upper arm circumference measurements, anemia and goiter status for time you spent and participation.

All data collected from the study will be kept confidential. If you have any questions related to the study you may contact directly Dr. Masresha Tessema who is the PI

#### The contact persons

1. Dr. Masresha Tessema  
Tel. [+251 919782082] E-mail: [masresha88@gmail.com]
2. [Mr. Ibrahim Kedir] Tel. [+251 911957161]

#### Certificate of Consent

|                                                                                                                                                                                                             |                                                                                                                                                                                                |
|-------------------------------------------------------------------------------------------------------------------------------------------------------------------------------------------------------------|------------------------------------------------------------------------------------------------------------------------------------------------------------------------------------------------|
| I have read the foregoing information. I have an opportunity to ask questions and all my questions have been answered to my satisfaction. I volunteer to give consent to participate in this research study | I confirm that the participant was given an opportunity to ask questions about the study and all questions have been answered correctly. I confirm that the consent has been given voluntarily |
| _____                                                                                                                                                                                                       | _____                                                                                                                                                                                          |
| Printed name of the participant                                                                                                                                                                             | _____                                                                                                                                                                                          |
| _____                                                                                                                                                                                                       | _____                                                                                                                                                                                          |
| Signature of the participant                                                                                                                                                                                | Printed name of the person taking the consent                                                                                                                                                  |
| Date _____                                                                                                                                                                                                  | _____                                                                                                                                                                                          |
| day/month/year                                                                                                                                                                                              | Signature of the person taking the consent Date                                                                                                                                                |
| _____                                                                                                                                                                                                       | _____                                                                                                                                                                                          |
| _____                                                                                                                                                                                                       | day/month/year                                                                                                                                                                                 |

#### 4. Informed Consent Form for Preschool Child

##### Ethiopian Food and Nutrition Strategy (FNS) Baseline Survey

**Investigator(s):** Dr. Masresha Tessema (PI), Meseret W/Yohannes, Dr. Meron Girma, Alemnesh Petros, Dr

Aregash Samuel, Arnaud Laillou, Stanley Chitekwe, Kaleab Baye, Ramadhani Noor, Anne Sophie Donze and other co-authors

You are being invited to take part in this research because you are either a mother or caregiver who has a child under the age of 5 years (0-59 months). There are [16596] households taking part in this research. We would collect a sample of your child's dietary information, blood, urine and stool. And, we will also measure your child's height/ length, weight, and mid upper arm circumference. Finally we will assess, your child's eye for bitot spot

#### Box 1. Taking part in this research is voluntary

You can refuse to take part in this study.

You can withdraw your participation from the study at any time

#### Information related to the study

The FNS baseline survey will be conducted in the 12 regions of Ethiopia. The study population will be children age 0-59 months having caregivers/mothers, school-age children 6-12 years), adolescent girls (10-19 years), reproductive-age women (15-49 years), pregnant and lactating women, and household head. The indicators that will be collected for the survey will be dietary intake, anthropometric status, nutrition sensitive and specific indicators and micronutrient status.

**The expected possible adverse effects :** there is no adverse effect by participating in this study

**The objective of this research:** to produce information on anthropometric status, dietary intakes, and micronutrient status of different population groups in Ethiopia, and assess the coverage of direct and indirect nutrition interventions.

|                                                                                                                                                                                                                                 |                                                                                                                                                                                                       |
|---------------------------------------------------------------------------------------------------------------------------------------------------------------------------------------------------------------------------------|-------------------------------------------------------------------------------------------------------------------------------------------------------------------------------------------------------|
| <b>Study design:</b> a population-based, cross-sectional design                                                                                                                                                                 |                                                                                                                                                                                                       |
| <b>The schedule of the study:</b> The study will be conducted from July, 2021 to April, 2023                                                                                                                                    |                                                                                                                                                                                                       |
| <b>Foreseeable risks and expected benefits arising from participation in the study</b>                                                                                                                                          |                                                                                                                                                                                                       |
| <b>Foreseeable risks</b>                                                                                                                                                                                                        | <b>Expected benefits</b>                                                                                                                                                                              |
| Risks to study participants for involvement in the coverage survey are low. There may be risks associated with COVID pandemic. Interviewers will be trained to minimize this risk and will use appropriate prevention measures. | The findings of the study will help the ministry of health and other stakeholder engaged in nutrition to improve and/or design appropriate health and nutrition intervention programs in the country. |
| <b>Occurrences that may take place during the study period</b>                                                                                                                                                                  |                                                                                                                                                                                                       |
| <b>Occurrences</b>                                                                                                                                                                                                              | <b>How to manage</b>                                                                                                                                                                                  |

1  
2  
3  
4  
5  
6  
7  
8  
9  
10  
11  
12  
13  
14  
15  
16  
17  
18  
19  
20  
21  
22  
23  
24  
25  
26  
27  
28  
29  
30  
31  
32  
33  
34  
35  
36  
37  
38  
39  
40  
41  
42  
43  
44  
45  
46  
47  
48  
49  
50  
51  
52  
53  
54  
55  
56  
57  
58  
59  
60

|                                         |                                                                                                                                                    |
|-----------------------------------------|----------------------------------------------------------------------------------------------------------------------------------------------------|
| Withdrawal of volunteers from the study | in such a case, we would respect the volunteer's decision to withdraw and also get a clear understanding of the<br><br>reason for their withdrawal |
|-----------------------------------------|----------------------------------------------------------------------------------------------------------------------------------------------------|

At the end of the study, you will not be receiving any financial benefits, but will get your results for height/length, weight, mid upper arm circumference measurements, and anemia for time you spent and participation.

All data collected from the study will be kept confidential. If you have any questions related to the study you may contact directly Dr. Masresha Tessema who is the project principal investigator

#### The contact persons

1. Dr. Masresha Tessema  
Tel. [+251 919782082] E-mail: [masresha88@gmail.com]
2. [Mr. Ibrahim Kedir] Tel. [+251 911957161] EPHI's IRB

#### Certificate of Consent

|                                                                                                                                                                                                                                                                                                                                                                                      |                                                                                                                                                                                                                                                                                                                                                                                      |
|--------------------------------------------------------------------------------------------------------------------------------------------------------------------------------------------------------------------------------------------------------------------------------------------------------------------------------------------------------------------------------------|--------------------------------------------------------------------------------------------------------------------------------------------------------------------------------------------------------------------------------------------------------------------------------------------------------------------------------------------------------------------------------------|
| <p>I have read the foregoing information. I have an opportunity to ask questions and all my questions have been answered to my satisfaction. I volunteer to give consent to participate in this research study</p> <p>_____</p> <p>Printed name of the participant</p> <p>_____</p> <p>Signature of the participant's parent or guardian</p> <p>Date _____</p> <p>day/month/year</p> | <p>I confirm that the participant was given an opportunity to ask questions about the study and all questions have been answered correctly. I confirm that the consent has been given voluntarily</p> <p>_____</p> <p>Printed name of the person taking the consent</p> <p>_____</p> <p>Signature of the person taking the consent Date _____</p> <p>_____</p> <p>day/month/year</p> |
|--------------------------------------------------------------------------------------------------------------------------------------------------------------------------------------------------------------------------------------------------------------------------------------------------------------------------------------------------------------------------------------|--------------------------------------------------------------------------------------------------------------------------------------------------------------------------------------------------------------------------------------------------------------------------------------------------------------------------------------------------------------------------------------|

## 5. Informed Consent Form for School Age Children

### Ethiopian Food and Nutrition Strategy (FNS) Baseline Survey

**Investigator(s):** Dr.Masresha Tessema (PI), Meseret W/Yohannes, Dr. Meron Girma, Alemnesh Petros, Dr Aregash Samuel, Arnaud Laillou, Stanley Chitekwe, Kaleab Baye, Ramadhani Noor, Anne Sophie Donze and other co-authors

You are being invited to take part in this research because you are either a mother or caregiver who has a school-age child. Among children 6 – 12 years, we will collect your child’s blood, urine and stool.

#### Box 1. Taking part in this research is voluntary

You can refuse to take part in this study.

You can withdraw your participation from the study at any time

#### Information related to the study

The FNS baseline survey will be conducted in the 12 regions of Ethiopia. The study population will be children age 0-59 months having caregivers/mothers, school-age children (6-12 years), adolescent girls (10-19 years), reproductive-age women (15-49 years), pregnant and lactating women, household head.

The indicators that will be collected for the survey will be dietary intake, anthropometric status, nutrition sensitive and specific indicators and micronutrient status.

**The expected possible adverse effects:** there is no adverse effect by participating in this study

**The objective of this research:** to produce information on anthropometric status, dietary intakes, and micronutrient status of different population groups in Ethiopia, and assess the coverage of direct and indirect nutrition interventions.

**Study design:** a population-based, cross-sectional design

**The schedule of the study:** The study will be conducted from July, 2021 to April, 2023

#### Foreseeable risks and expected benefits arising from participation in the study

##### Foreseeable risks

Risks to study participants for involvement in the coverage survey are low. There may be risks associated with COVID pandemic. Interviewers will be trained to minimize this risk and will use appropriate prevention measures.

##### Expected benefits

The findings of the study will help the ministry of health and other stakeholder engaged in nutrition to improve and/or design appropriate health and nutrition intervention programs in the country.

#### Occurrences that may take place during the study period

##### Occurrences

##### How to manage

1  
2  
3  
4  
5  
6  
7  
8  
9  
10  
11  
12  
13  
14  
15  
16  
17  
18  
19  
20  
21  
22  
23  
24  
25  
26  
27  
28  
29  
30  
31  
32  
33  
34  
35  
36  
37  
38  
39  
40  
41  
42  
43  
44  
45  
46  
47  
48  
49  
50  
51  
52  
53  
54  
55  
56  
57  
58  
59  
60

|                                         |                                                                                                                                             |
|-----------------------------------------|---------------------------------------------------------------------------------------------------------------------------------------------|
| Withdrawal of volunteers from the study | In such a case, we would respect the volunteer's decision to withdraw and also get a clear understanding of the reason for their withdrawal |
|-----------------------------------------|---------------------------------------------------------------------------------------------------------------------------------------------|

At the end of the study, you will not be receiving any financial benefits, but you will get your **anemia** and **goiter** status for time you spent and participation.

All data collected from the study will be kept confidential. If you have any questions related to the study you may contact directly Dr. Masresha Tessema who is the project's PI

#### The contact persons

1. Dr. Masresha Tessema  
Tel. [+251 919782082] E-mail: [masresha88@gmail.com]
2. [Mr. Ibrahim Kedir] Tel. [+251 911957161] EPHI's IRB

#### Certificate of Consent

|                                                                                                                                                                                                             |                                                                                                                                                                                                |
|-------------------------------------------------------------------------------------------------------------------------------------------------------------------------------------------------------------|------------------------------------------------------------------------------------------------------------------------------------------------------------------------------------------------|
| I have read the foregoing information. I have an opportunity to ask questions and all my questions have been answered to my satisfaction. I volunteer to give consent to participate in this research study | I confirm that the participant was given an opportunity to ask questions about the study and all questions have been answered correctly. I confirm that the consent has been given voluntarily |
| _____                                                                                                                                                                                                       | _____                                                                                                                                                                                          |
| Printed name of the participant                                                                                                                                                                             | Printed name of the person taking the consent                                                                                                                                                  |
| _____                                                                                                                                                                                                       | _____                                                                                                                                                                                          |
| Signature of the participant's parent or guardian                                                                                                                                                           | Signature of the person taking the consent                                                                                                                                                     |
| Date _____<br>day/month/year                                                                                                                                                                                | Date _____<br>day/month/year                                                                                                                                                                   |

## 6. Assent form for Adolescent Girls (10-19 years)

### Ethiopian Food and Nutrition Strategy (FNS) Baseline Survey

**Investigator(s):** Dr.Masresha Tessema (PI), Meseret W/Yohannes, Dr. Meron Girma, Alemnesh Petros, Dr Aregash Samuel, Arnaud Laillou, Stanley Chitekwe, Kaleab Baye, Ramadhani Noor, Anne Sophie Donze and other co-authors

You are being invited to take part in this research because you are Adolescent girl. There are [16596] households taking part in this research. We will measure your dietary information (for those adolescent girls aged 15-17 years), information related to nutrition -sensitive and nutrition-specific practices, blood, and stool, we will also measure your height, weight, and mid upper arm and waist circumference and your goiter status

#### Box 1. Taking part in this research is voluntary

You can refuse to take part in this study.

You can withdraw your participation from the study at any time

#### Information related to the study

The FNS baseline survey will be conducted in the 12 regions of Ethiopia. The study population will be children age 0-59 months having caregivers/mothers, school-age children (6-12 years), adolescent girls (10-19 years), reproductive-age women (15-49 years), pregnant and lactating women, and household head. The indicators that will be collected for the survey will be dietary intake, anthropometric status, nutrition sensitive and specific indicators and micronutrient status

**The expected possible adverse effects:** There is no adverse effect by participating in this study

**The objective of this research:** to produce information on anthropometric status, dietary intakes, and micronutrient status of different population groups in Ethiopia, and assess the coverage of direct and indirect nutrition interventions.

**Study design:** a population-based, cross-sectional design

**The schedule of the study:** The study will be conducted from July, 2021 to April, 2023

#### Foreseeable risks and expected benefits arising from participation in the study

##### Foreseeable risks

Risks to study participants for involvement in the coverage survey are low. There may be risks associated with COVID pandemic. Interviewers will be trained to minimize this risk and will use appropriate prevention measures.

##### Expected benefits

The findings of the study will help the ministry of health and other stakeholder engaged in nutrition to improve and/or design appropriate health and nutrition intervention programs in the country.



| <b>Occurrences that may take place during the study period</b> |                                                                                                                                             |
|----------------------------------------------------------------|---------------------------------------------------------------------------------------------------------------------------------------------|
| <b>Occurrences</b>                                             | <b>How to manage</b>                                                                                                                        |
| Withdrawal of volunteers from the study                        | In such a case, we would respect the volunteer's decision to withdraw and also get a clear understanding of the reason for their withdrawal |

At the end of the study, you will not be receiving any financial benefits, but will get your results for height, weight, mid upper arm and waist circumference measurements, anemia and goiter status for time you spent and participation.

All data collected from the study will be kept confidential. If you have any questions related to the study you may contact directly Dr. Masresha Tessema who is the project's PI

#### **The contact persons**

1. Dr. Masresha Tessema  
Tel. [+251 919782082] E-mail: [masresha88@gmail.com]
2. [Mr. Ibrahim Kedir] Tel. [+251 911957161] EPHI's IRB

#### **Certificate of Assent**

|                                                                                                                                                                                                            |                                                                                                                                                                                               |
|------------------------------------------------------------------------------------------------------------------------------------------------------------------------------------------------------------|-----------------------------------------------------------------------------------------------------------------------------------------------------------------------------------------------|
| I have read the foregoing information. I have an opportunity to ask questions and all my questions have been answered to my satisfaction. I volunteer to give assent to participate in this research study | I confirm that the participant was given an opportunity to ask questions about the study and all questions have been answered correctly. I confirm that the assent has been given voluntarily |
| _____                                                                                                                                                                                                      | _____                                                                                                                                                                                         |
| Printed name of the participant                                                                                                                                                                            | Printed name of the person taking the assent                                                                                                                                                  |
| _____                                                                                                                                                                                                      | _____                                                                                                                                                                                         |
| Signature of the participant                                                                                                                                                                               | Signature of the person taking the assent                                                                                                                                                     |
| Date _____                                                                                                                                                                                                 | Date _____                                                                                                                                                                                    |
| day/month/year                                                                                                                                                                                             | day/month/year                                                                                                                                                                                |

## STROBE Statement—checklist of items that should be included in reports of observational studies

|                           | Item No | Recommendation                                                                                                                                                                                                                                                                                                                                                                                                                                                                                                                                                                                                                                                                                   | Reported on page #                                            |
|---------------------------|---------|--------------------------------------------------------------------------------------------------------------------------------------------------------------------------------------------------------------------------------------------------------------------------------------------------------------------------------------------------------------------------------------------------------------------------------------------------------------------------------------------------------------------------------------------------------------------------------------------------------------------------------------------------------------------------------------------------|---------------------------------------------------------------|
| <b>Title and abstract</b> | 1       | (a) Indicate the study's design with a commonly used term in the title or the abstract<br>(b) Provide in the abstract an informative and balanced summary of what was done and what was found                                                                                                                                                                                                                                                                                                                                                                                                                                                                                                    | Title p.1; Abstract p.2-3                                     |
| <b>Introduction</b>       |         |                                                                                                                                                                                                                                                                                                                                                                                                                                                                                                                                                                                                                                                                                                  |                                                               |
| <b>Introduction</b>       | 4       | Explain the scientific background and rationale for the investigation being reported                                                                                                                                                                                                                                                                                                                                                                                                                                                                                                                                                                                                             | <b>Introduction</b><br>p.3-4                                  |
| Objectives                | 5       | State specific objectives, including any prespecified hypotheses                                                                                                                                                                                                                                                                                                                                                                                                                                                                                                                                                                                                                                 | Background p.5<br>last statements                             |
| <b>Methods</b>            |         |                                                                                                                                                                                                                                                                                                                                                                                                                                                                                                                                                                                                                                                                                                  |                                                               |
| Study design              | 5       | Present key elements of study design early in the paper                                                                                                                                                                                                                                                                                                                                                                                                                                                                                                                                                                                                                                          | Methods (data source) p.4                                     |
| Setting                   | 5       | Describe the setting, locations, and relevant dates, including periods of recruitment, exposure, follow-up, and data collection                                                                                                                                                                                                                                                                                                                                                                                                                                                                                                                                                                  | Methods (data source) p.5                                     |
| Participants              | 5       | (a) <i>Cohort study</i> —Give the eligibility criteria, and the sources and methods of selection of participants. Describe methods of follow-up<br><i>Case-control study</i> —Give the eligibility criteria, and the sources and methods of case ascertainment and control selection. Give the rationale for the choice of cases and controls<br><i>Cross-sectional study</i> —Give the eligibility criteria, and the sources and methods of selection of participants<br>(b) <i>Cohort study</i> —For matched studies, give matching criteria and number of exposed and unexposed<br><i>Case-control study</i> —For matched studies, give matching criteria and the number of controls per case | Methods (participants) p.5-8                                  |
| Variables                 | 5       | Clearly define all outcomes, exposures, predictors, potential confounders, and effect modifiers. Give diagnostic criteria, if applicable                                                                                                                                                                                                                                                                                                                                                                                                                                                                                                                                                         | Methods (all outcome and exposure variables are listed) p.6-8 |
| Data sources/measurement  | NA      | For each variable of interest, give sources of data and details of methods of assessment (measurement). Describe comparability of assessment methods if there is more than one group                                                                                                                                                                                                                                                                                                                                                                                                                                                                                                             | Methods (methods of measurement indicated in) p.5-8           |
| Bias                      | 10      | Describe any efforts to address potential sources of bias                                                                                                                                                                                                                                                                                                                                                                                                                                                                                                                                                                                                                                        | Methods (data quality indicated) p.10-11                      |
| Study size                | 5-6     | Explain how the study size was arrived at                                                                                                                                                                                                                                                                                                                                                                                                                                                                                                                                                                                                                                                        | Methods (data source, statistical                             |

analysis) p.5

|                        |    |                                                                                                                              |                                                                |
|------------------------|----|------------------------------------------------------------------------------------------------------------------------------|----------------------------------------------------------------|
| Quantitative variables | 10 | Explain how quantitative variables were handled in the analyses. If applicable, describe which groupings were chosen and why | Methods (measurement and statistical analysis sections) p. 8-9 |
| Statistical methods    | 10 | (a) Describe all statistical methods, including those used to control for confounding                                        | Methods (analysis section) p. 8-9                              |
|                        |    | (b) Describe any methods used to examine subgroups and interactions                                                          |                                                                |
|                        |    | (c) Explain how missing data were addressed                                                                                  |                                                                |
|                        |    | (d) <i>Cohort study</i> —If applicable, explain how loss to follow-up was addressed                                          |                                                                |
|                        |    | <i>Case-control study</i> —If applicable, explain how matching of cases and controls was addressed                           |                                                                |
|                        |    | <i>Cross-sectional study</i> —If applicable, describe analytical methods taking account of sampling strategy                 |                                                                |
|                        |    | (e) Describe any sensitivity analyses                                                                                        |                                                                |

Continued on next page

| <b>Results</b>    |     |                                                                                                                                                                                                                                                                                                                                                                                                               |                                                                                                   |
|-------------------|-----|---------------------------------------------------------------------------------------------------------------------------------------------------------------------------------------------------------------------------------------------------------------------------------------------------------------------------------------------------------------------------------------------------------------|---------------------------------------------------------------------------------------------------|
| Participants      | 5*  | (a) Report numbers of individuals at each stage of study—eg numbers potentially eligible, examined for eligibility, confirmed eligible, included in the study, completing follow-up, and analysed<br>(b) Give reasons for non-participation at each stage<br>(c) Consider use of a flow diagram                                                                                                               | NA                                                                                                |
| Descriptive data  | 14* | (a) Give characteristics of study participants (eg demographic, clinical, social) and information on exposures and potential confounders<br>(b) Indicate number of participants with missing data for each variable of interest<br>(c) <i>Cohort study</i> —Summarise follow-up time (eg, average and total amount)                                                                                           | NA                                                                                                |
| Outcome data      | 15* | <i>Cohort study</i> —Report numbers of outcome events or summary measures over time<br><i>Case-control study</i> —Report numbers in each exposure category, or summary measures of exposure<br><i>Cross-sectional study</i> —Report numbers of outcome events or summary measures                                                                                                                             | NA                                                                                                |
| Main results      | 16  | (a) Give unadjusted estimates and, if applicable, confounder-adjusted estimates and their precision (eg, 95% confidence interval). Make clear which confounders were adjusted for and why they were included<br>(b) Report category boundaries when continuous variables were categorized<br>(c) If relevant, consider translating estimates of relative risk into absolute risk for a meaningful time period | NA                                                                                                |
| Other analyses    | 17  | Report other analyses done—eg analyses of subgroups and interactions, and sensitivity analyses                                                                                                                                                                                                                                                                                                                | NA                                                                                                |
| <b>Discussion</b> |     |                                                                                                                                                                                                                                                                                                                                                                                                               |                                                                                                   |
| Key results       | 18  | Summarise key results with reference to study objectives                                                                                                                                                                                                                                                                                                                                                      | p. 9-10                                                                                           |
| Limitations       | 19  | Discuss limitations of the study, taking into account sources of potential bias or imprecision. Discuss both direction and magnitude of any potential bias                                                                                                                                                                                                                                                    | Discussion (strengths and weaknesses of the study) p.10-11                                        |
| Interpretation    | 20  | Give a cautious overall interpretation of results considering objectives, limitations, multiplicity of analyses, results from similar studies, and other relevant evidence                                                                                                                                                                                                                                    | Discussion (interpretation of findings in the context of existing research, meaning of the study: |

1  
2  
3  
4  
5  
6  
7  
8  
9  
10  
11  
12  
13  
14  
15  
16  
17  
18  
19  
20  
21  
22  
23  
24  
25  
26  
27  
28  
29  
30  
31  
32  
33  
34  
35  
36  
37  
38  
39  
40  
41  
42  
43  
44  
45  
46  
47  
48  
49  
50  
51  
52  
53  
54  
55  
56  
57  
58  
59  
60p.9-11  
implication

---

|                  |    |                                                                       |                                                          |
|------------------|----|-----------------------------------------------------------------------|----------------------------------------------------------|
| Generalisability | 21 | Discuss the generalisability (external validity) of the study results | Discussion (strengths and weakness of the study) p.10-11 |
|------------------|----|-----------------------------------------------------------------------|----------------------------------------------------------|

---

**Other information**


---

|         |    |                                                                                                                                                               |              |
|---------|----|---------------------------------------------------------------------------------------------------------------------------------------------------------------|--------------|
| Funding | 22 | Give the source of funding and the role of the funders for the present study and, if applicable, for the original study on which the present article is based | Funding p.12 |
|---------|----|---------------------------------------------------------------------------------------------------------------------------------------------------------------|--------------|

\*Give information separately for cases and controls in case-control studies and, if applicable, for exposed and unexposed groups in cohort and cross-sectional studies.

**Note:** An Explanation and Elaboration article discusses each checklist item and gives methodological background and published examples of transparent reporting. The STROBE checklist is best used in conjunction with this article (freely available on the Web sites of PLoS Medicine at <http://www.plosmedicine.org/>, Annals of Internal Medicine at <http://www.annals.org/>, and Epidemiology at <http://www.epidem.com/>). Information on the STROBE Initiative is available at [www.strobe-statement.org](http://www.strobe-statement.org).
