# Supplementary material for: Ethiopia National Food and Nutrition Survey to inform the Ethiopian National Food and Nutrition Strategy: a study protocol
Source: PubMed Central journal article supplement (PMC10151871; doi:10.1136/bmjopen-2022-067641), 2023-04-25
Supplement: bmjopen-2022-067641supp001.pdf [file bmjopen-2022-067641supp001.pdf]

|                                                                                   |                                                               |                                         |                               |
|-----------------------------------------------------------------------------------|---------------------------------------------------------------|-----------------------------------------|-------------------------------|
|  | Name of institute<br><b>ETHIOPIAN PUBLIC HEALTH INSTITUTE</b> | Doc. number:<br>EPHI/ TL/ FNL/TM/7.2.11 | Version No: 3<br>Copy no_____ |
|                                                                                   |                                                               |                                         | Page 1 of 7                   |
| Document Title: <b>DETERMIANTION OF IODINE FROM SALT SAMPLE</b>                   |                                                               | Effective date: November 20, 2020       |                               |

### 1. Purpose

This procedure used to determine the amount of iodine content in the form of potassium iodate ( $KIO_3$ ) by iodometric titration from iodized salt.

### 2. Abbreviations:

|            |                   |                                                                 |                                  |
|------------|-------------------|-----------------------------------------------------------------|----------------------------------|
| <b>g</b>   | gram              | <b>KI</b>                                                       | Potassium Iodide                 |
| <b>ppm</b> | Parts Per million | <b>H<sub>2</sub>SO<sub>4</sub></b>                              | sulfuric acid                    |
| <b>M</b>   | Molarity          | <b>KIO<sub>3</sub></b>                                          | potassium iodate                 |
| <b>ml</b>  | mili liter        | <b>IDD</b>                                                      | Iodine deficiency disorder       |
| <b>N</b>   | Normality         | <b>Na<sub>2</sub>S<sub>2</sub>O<sub>3</sub>.5H<sub>2</sub>O</b> | sodium thiosulfate penta hydrate |

### 3. Principle:

Iodine released from potassium iodate by the action of sulphuric acid and the released iodine trapped with potassium iodide and titrate with sodium thiosulphate.

### 4. Material and methods

#### 4.1 Reagents

- 0.005M  $Na_2S_2O_3 \cdot 5H_2O$
- 2N  $H_2SO_4$
- 10% KI
- 1% Starch

#### 4.2 Reagents preparation:

- **1% starch:** Dissolve 1 g of soluble starch in 100ml boiled distilled water heat the solution till starch dissolve completely.
- **10% KI:** Dissolve 10gm of KI in 100ml deionized water.

Prepared by: Addisu Legesse and Teshome Assefa

Authority: EPHI

NOTE: This is a CONTROLLED document for internal use only. Any documents appearing in paper form are not controlled and should be checked against the electronic version prior to use.

|                                                                                   |                                                               |                                         |                               |
|-----------------------------------------------------------------------------------|---------------------------------------------------------------|-----------------------------------------|-------------------------------|
|  | Name of institute<br><b>ETHIOPIAN PUBLIC HEALTH INSTITUTE</b> | Doc. number:<br>EPHI/ TL/ FNL/TM/7.2.11 | Version No: 3<br>Copy no_____ |
|                                                                                   |                                                               |                                         | Page 2 of 7                   |
| Document Title: <b>DETERMIANTION OF IODINE FROM SALT SAMPLE</b>                   |                                                               | Effective date: November 20, 2020       |                               |

- **2N H<sub>2</sub>SO<sub>4</sub>**; Slowly add 6 ml of concentrated H<sub>2</sub>SO<sub>4</sub> to 90 ml of deionized water make the final volume 100 ml.
- **0.005M Na<sub>2</sub>S<sub>2</sub>O<sub>3</sub>**; Dissolve 1.24gm of Na<sub>2</sub>S<sub>2</sub>O<sub>3</sub>.5H<sub>2</sub>O in 1000 ml of deionized water

#### 4.3 Reagents stability and storage:

- Na<sub>2</sub>S<sub>2</sub>O<sub>3</sub>.5H<sub>2</sub>O & 10% KI reagents store in a cool & dark place for six months.
- H<sub>2</sub>SO<sub>4</sub> store at room temperature it stable indefinitely.
- Starch should be prepared daily.

#### 5. Supplies and Equipment

- Balance (Four-beam pan): Sensitivity = 0.01g, Capacity = 410g
- Flask, volumetric, 1000mL, 100mL
- Measuring cylinder, 10mL, 100mL
- Beakers (Pyrex)
- Flasks, Erlenmeyer (conical) with stopper, 250mL
- Pipette, volumetric, 1mL, 5mL
- Burette w/straight stopcock 10mL
- Burette stand
- Laboratory safety glasses
- Parafilm, for covering beakers
- Glass bottles with stoppers, for reagents, 250mL
- Spatula Lab single blade 150mm SS length
- Dropper bottle, glass 25-60mL
- Hot plate

#### 6. Sample

- Sample type: salt
- Amount required: 50-100g
- Transport and storage: At room temperature avoid exposure to direct sunlight

Prepared by: Addisu Legesse and Teshome Assefa

Authority: EPHI

NOTE: This is a CONTROLLED document for internal use only. Any documents appearing in paper form are not controlled and should be checked against the electronic version prior to use.

|                                                                                   |                                                               |                                         |                               |
|-----------------------------------------------------------------------------------|---------------------------------------------------------------|-----------------------------------------|-------------------------------|
|  | Name of institute<br><b>ETHIOPIAN PUBLIC HEALTH INSTITUTE</b> | Doc. number:<br>EPHI/ TL/ FNL/TM/7.2.11 | Version No: 3<br>Copy no_____ |
|                                                                                   |                                                               |                                         | Page 3 of 7                   |
| Document Title: <b>DETERMIANTION OF IODINE FROM SALT SAMPLE</b>                   |                                                               | Effective date: November 20, 2020       |                               |

- Stability: At room temperature for 3 months.

### 7. Special Safety and Precautions

- While titrate the sample wear eye google.
- The reaction mixture should be kept in the dark before titration because a side reaction can occur when the solution is exposed to light that causes iodide ions to be oxidized to iodine.
- Inaccurate results may occur if starch solution is used while still warm.
- If starch indicator is added too early, a strong iodine-starch complex is formed, which reacts slowly, and gives falsely elevated results.
- The reaction should be performed at mild room temperature (<30 °C), since the iodine is volatile, and the indicator solution loses sensitivity when exposed to high temperatures.

### 8. Procedure

- 8.1 Weigh 10g of the salt sample into a 250mL Erlenmeyer flask with a stopper.
- 8.2 Add approximately 50 mL water, swirl to dissolve salt sample.
- 8.3 Add 1 ml 2N H<sub>2</sub>SO<sub>4</sub>
- 8.4 Add 5mL 10% KI. The solution should turn yellow if iodine is present.
- 8.5 Close the flask with stopper & put it in the dark place for 10 minutes in closed box (cupboard or drawer).
- 8.6 Rinse and fill burette with 0.005M Na<sub>2</sub>S<sub>2</sub>O<sub>3</sub>, and adjust level to zero.
- 8.7 After 10 minutes take the flask out from drawer, and add some Na<sub>2</sub>S<sub>2</sub>O<sub>3</sub> from the titration burette Until the solution turns pale yellow.
- 8.8 Add approximately 2mL of starch indicator solution (the solution should turn dark purple) and continue titrating with 0.005M Na<sub>2</sub>S<sub>2</sub>O<sub>3</sub> until the solution becomes pink, and finally colorless.
- 8.9 Record the level of thiosulfate in the burette and convert to parts per million (ppm)

Prepared by: Addisu Legesse and Teshome Assefa

Authority: EPHI

NOTE: This is a CONTROLLED document for internal use only. Any documents appearing in paper form are not controlled and should be checked against the electronic version prior to use.

|                                                                                   |                                                               |                                         |                               |
|-----------------------------------------------------------------------------------|---------------------------------------------------------------|-----------------------------------------|-------------------------------|
|  | Name of institute<br><b>ETHIOPIAN PUBLIC HEALTH INSTITUTE</b> | Doc. number:<br>EPHI/ TL/ FNL/TM/7.2.11 | Version No: 3<br>Copy no_____ |
|                                                                                   |                                                               |                                         | Page 4 of 7                   |
| Document Title: <b>DETERMIANTION OF IODINE FROM SALT SAMPLE</b>                   |                                                               | Effective date: November 20, 2020       |                               |

### 9. Quality control:

- **Control material:** KIO<sub>3</sub>
- **Level of iodine:** 59.3-60.3ppm
- **Stability:** stable at room temperature for long period of time.
- **Frequency:** per batch

**10. Quality control preparation:** Prepare 0.0047M KIO<sub>3</sub> in 100ml. By weighing 0.10058g in 100ml deionized water. From this solution Pipette out 1 ml into conical flask and follow the procedure proceed from step 2 as described above.

### 11. Calculation

$$\text{Iodine(ppm)} = 10.6 * V \text{ Na}_2\text{S}_2\text{O}_3(\text{ml})$$

**Where:** VNa<sub>2</sub>S<sub>2</sub>O<sub>3</sub>: Volume of sodium thiosulphate takes to titrate iodine in salt

### 12. Result Interpretation

- **<5ppm** to indicate salt with no added iodine
- **5-14.9** ppm to indicate inadequately iodized salt
- **15-39.9** ppm to indicate salt is adequately iodized
- **>40** ppm of iodine is not recommended.

### 13. Other Records

- Data Log sheet
- QC chart

### 14. References

- De Maeyer, Lowenstein & Thilly, 1979; World Health Organization (WHO), United Nations Children Fund (UNICEF) & ICCIDD, 2007.
- AOAC 925.56 2016

Prepared by: Addisu Legesse and Teshome Assefa

Authority: EPHI

NOTE: This is a CONTROLLED document for internal use only. Any documents appearing in paper form are not controlled and should be checked against the electronic version prior to use.

|                                                                                   |                                                                 |                                         |                                   |
|-----------------------------------------------------------------------------------|-----------------------------------------------------------------|-----------------------------------------|-----------------------------------|
|  | Name of institute<br><b>ETHIOPIAN PUBLIC HEALTH INSTITUTE</b>   | Doc. number:<br>EPHI/ TL/ FNL/TM/7.2.11 | Version No: 3<br>Copy no_____     |
|                                                                                   |                                                                 |                                         | Page 5 of 7                       |
|                                                                                   | Document Title: <b>DETERMIANTION OF IODINE FROM SALT SAMPLE</b> |                                         | Effective date: November 20, 2020 |

## 15. Annex

Conversion chart for iodine in fortified salt in the form of  $KIO_3$  (PPM)

| Volume<br>Thiosulphate<br>(mL) | Iodine<br>(ppm) | Volume<br>Thiosulphate<br>(mL) | Iodine<br>(ppm) | Volume<br>Thiosulphate<br>(mL) | Iodine<br>(ppm) | Volume<br>Thiosulphate<br>(mL) | Iodine<br>(ppm) | Volume<br>Thiosulphate<br>(mL) | Iodine<br>(ppm) | Volume<br>Thiosulphate<br>(mL) | Iodine<br>(ppm) |
|--------------------------------|-----------------|--------------------------------|-----------------|--------------------------------|-----------------|--------------------------------|-----------------|--------------------------------|-----------------|--------------------------------|-----------------|
| 0.1                            | 1.1             | 2.0                            | 21.2            | 3.9                            | 41.3            | 5.8                            | 61.5            | 7.7                            | 81.6            | 9.6                            | 101.8           |
| 0.2                            | 2.1             | 2.1                            | 22.2            | 4.0                            | 42.4            | 5.9                            | 62.5            | 7.8                            | 82.7            | 9.7                            | 102.8           |
| 0.3                            | 3.2             | 2.2                            | 23.3            | 4.1                            | 43.5            | 6.0                            | 63.6            | 7.9                            | 83.4            | 9.8                            | 103.9           |
| 0.4                            | 4.2             | 2.3                            | 24.4            | 4.2                            | 44.5            | 6.1                            | 64.7            | 8.0                            | 84.8            | 9.9                            | 104.9           |
| 0.5                            | 5.3             | 2.4                            | 25.4            | 4.3                            | 45.6            | 6.2                            | 65.7            | 8.1                            | 85.9            | 10.0                           | 106.0           |
| 0.6                            | 6.4             | 2.5                            | 26.5            | 4.4                            | 46.4            | 6.3                            | 66.8            | 8.2                            | 86.9            | 10.1                           | 107.1           |
| 0.7                            | 7.4             | 2.6                            | 27.6            | 4.5                            | 47.7            | 6.4                            | 67.8            | 8.3                            | 88.0            | 10.2                           | 108.1           |
| 0.8                            | 8.5             | 2.7                            | 28.6            | 4.6                            | 48.8            | 6.5                            | 68.9            | 8.4                            | 89.0            | 10.3                           | 109.2           |
| 0.9                            | 9.4             | 2.8                            | 29.7            | 4.7                            | 49.8            | 6.6                            | 70.0            | 8.5                            | 90.1            | 10.4                           | 110.2           |
| 1.0                            | 10.6            | 2.9                            | 30.7            | 4.8                            | 50.9            | 6.7                            | 71.0            | 8.6                            | 91.2            | 10.5                           | 111.3           |
| 1.1                            | 11.7            | 3.0                            | 31.8            | 4.9                            | 51.9            | 6.8                            | 72.1            | 8.7                            | 92.2            | 10.6                           | 112.4           |
| 1.2                            | 12.2            | 3.1                            | 32.9            | 5.0                            | 53.0            | 6.9                            | 73.1            | 8.8                            | 93.3            | 10.7                           | 113.4           |
| 1.3                            | 13.8            | 3.2                            | 33.9            | 5.1                            | 54.1            | 7.0                            | 74.2            | 8.9                            | 94.3            | 10.8                           | 114.5           |
| 1.4                            | 14.8            | 3.3                            | 35.0            | 5.2                            | 55.1            | 7.1                            | 75.3            | 9.0                            | 95.4            | 10.9                           | 115.5           |
| 1.5                            | 15.9            | 3.4                            | 36.0            | 5.3                            | 56.2            | 7.2                            | 76.3            | 9.1                            | 96.5            | 11.0                           | 116.6           |
| 1.6                            | 17.0            | 3.5                            | 37.1            | 5.4                            | 57.2            | 7.3                            | 77.4            | 9.2                            | 97.5            | 11.1                           | 117.7           |
| 1.7                            | 18.0            | 3.6                            | 38.2            | 5.5                            | 58.3            | 7.4                            | 78.4            | 9.3                            | 98.6            | 11.2                           | 118.7           |
| 1.8                            | 19.1            | 3.7                            | 39.2            | 5.6                            | 59.4            | 7.5                            | 79.5            | 9.4                            | 99.7            | 11.3                           | 119.8           |
| 1.9                            | 20.1            | 3.8                            | 40.3            | 5.7                            | 60.4            | 7.6                            | 80.6            | 9.5                            | 100.7           | 11.4                           | 120.8           |

Prepared by: Addisu Legesse and Teshome Assefa

Authority: EPHI

NOTE: This is a CONTROLLED document for internal use only. Any documents appearing in paper form are not controlled and should be checked against the electronic version prior to use.

|                                                                                   |                                                               |                                         |                               |
|-----------------------------------------------------------------------------------|---------------------------------------------------------------|-----------------------------------------|-------------------------------|
|  | Name of institute<br><b>ETHIOPIAN PUBLIC HEALTH INSTITUTE</b> | Doc. number:<br>EPHI/ TL/ FNL/TM/7.2.11 | Version No: 3<br>Copy no_____ |
|                                                                                   |                                                               |                                         | Page 6 of 7                   |
| Document Title: <b>DETERMIANTION OF IODINE FROM SALT SAMPLE</b>                   |                                                               | Effective date: November 20, 2020       |                               |

| Name               | Signature |
|--------------------|-----------|
| Prepared by: ----- | -----     |
| Reviewed by: ----- | -----     |
| Approved by: ----- | -----     |

(Director of Food science and Nutrition research directorate)

**Declaration**

I, the undersigned laboratory personnel, certify that I am conducting every steps of the procedures incorporated in this SOP after a prior reading.

| Name  | Signature and Date |
|-------|--------------------|
| ..... | .....              |
| ..... | .....              |
| ..... | .....              |
| ..... | .....              |
| ..... | .....              |

|                                                |                 |
|------------------------------------------------|-----------------|
| Prepared by: Addisu Legesse and Teshome Assefa | Authority: EPHI |
|------------------------------------------------|-----------------|

NOTE: This is a CONTROLLED document for internal use only. Any documents appearing in paper form are not controlled and should be checked against the electronic version prior to use.

|                                                                                   |                                                               |                                         |                               |
|-----------------------------------------------------------------------------------|---------------------------------------------------------------|-----------------------------------------|-------------------------------|
|  | Name of institute<br><b>ETHIOPIAN PUBLIC HEALTH INSTITUTE</b> | Doc. number:<br>EPHI/ TL/ FNL/TM/7.2.11 | Version No: 3<br>Copy no_____ |
|                                                                                   |                                                               |                                         | Page 7 of 7                   |
| Document Title: <b>DETERMIANTION OF IODINE FROM SALT SAMPLE</b>                   |                                                               | Effective date: November 20, 2020       |                               |

### Document Change History

| Revision No. | Date approved  | Nature of revision                                           |
|--------------|----------------|--------------------------------------------------------------|
| 1            | February, 2019 | Initial release                                              |
| 2            | November, 2020 | Typographical adjustment<br>Document revision table is added |

Prepared by: Addisu Legesse and Teshome Assefa

Authority: EPHI

NOTE: This is a CONTROLLED document for internal use only. Any documents appearing in paper form are not controlled and should be checked against the electronic version prior to use.
