# Supplementary material for: Ethiopia National Food and Nutrition Survey to inform the Ethiopian National Food and Nutrition Strategy: a study protocol
Source: PubMed Central journal article supplement (PMC10151871; doi:10.1136/bmjopen-2022-067641), 2023-04-25
Supplement: bmjopen-2022-067641supp012.pdf [file bmjopen-2022-067641supp012.pdf]

**Annex 2: Nutrition direct and indirect interventions/indicators assessment questionnaire**  
**Nutrition direct and indirect Interventions Questionnaire**

**Module 1: Household identifier, characteristics and socio-demographic status**

| Household identifier and characteristics |                                                                                                                                     |                                                                                                                                                               |             |             |             |
|------------------------------------------|-------------------------------------------------------------------------------------------------------------------------------------|---------------------------------------------------------------------------------------------------------------------------------------------------------------|-------------|-------------|-------------|
| 101                                      | Region Code                                                                                                                         | _ _ _                                                                                                                                                         |             |             |             |
| 102                                      | Woreda Code                                                                                                                         | _ _ _                                                                                                                                                         |             |             |             |
| 103                                      | Kebele Code                                                                                                                         | _ _ _                                                                                                                                                         |             |             |             |
| 104                                      | Gote Code                                                                                                                           | _ _ _                                                                                                                                                         |             |             |             |
| 105                                      | Household Code                                                                                                                      | _ _ _  GPS Coordinates                                                                                                                                        |             |             |             |
| 106                                      | Unique Household Code                                                                                                               | _ _ _ _                                                                                                                                                       | _ _ _       | _ _ _       | _ _ _       |
|                                          |                                                                                                                                     | _                                                                                                                                                             | Region Code | Woreda Code | Kebele Code |
| 107                                      | Residence                                                                                                                           | 1 = Urban<br>2 = Rural                                                                                                                                        |             |             | _           |
| 108                                      | Do you own this house?                                                                                                              | 1 = Yes<br>0 = No                                                                                                                                             |             |             | _           |
| 109                                      | What is the main material of the walls?<br><b>Observe</b>                                                                           | 1 = No walls<br>2 = Natural materials (cane, wood, mud, straw)<br>3 = Stone with mud<br>4 = Stone/bricks with cement<br>99 = Other                            |             |             | _ _ _       |
| 110                                      | What is the main floor material?<br><b>Observe</b>                                                                                  | 1 = Natural floor (earth/sand/dung)<br>2 = Rudimentary floor (wood/palm/bamboo)<br>3=Finished floor (polished wood/ vinyl/ tiles/cement/carpet)<br>99 = Other |             |             | _ _ _       |
| 111                                      | What is the main material of the roof?<br><b>Observe</b>                                                                            | 1 = Thatch/grass or leaves<br>2 = Iron sheets or tiles<br>99 = Other                                                                                          |             |             | _ _ _       |
| 112                                      | What type of fuel does your household mostly use for cooking?<br><b>Do not read list</b>                                            | 1 = Dung<br>2 = Firewood/straw<br>3 = Charcoal<br>4 = Kerosene<br>5 = Gas (methane/biogas)<br>6 = Electricity<br>99 = Other                                   |             |             | _ _ _       |
| 113                                      | Is the house connected to electricity?                                                                                              | 1 = Yes<br>0 = No                                                                                                                                             |             |             | _           |
| 114                                      | In total, how many of the following items are owned by residents of this household?<br><b>Add the household total for each item</b> | A kerosene lamp/pressure lamp                                                                                                                                 |             |             | _           |
| 115                                      |                                                                                                                                     | Mobile phone                                                                                                                                                  |             |             | _           |
| 116                                      |                                                                                                                                     | Cart                                                                                                                                                          |             |             | _           |
| 117                                      |                                                                                                                                     | Bicycle                                                                                                                                                       |             |             | _           |
| 118                                      |                                                                                                                                     | Motorcycle                                                                                                                                                    |             |             | _           |
| 119                                      |                                                                                                                                     | Radio                                                                                                                                                         |             |             | _           |
| 120                                      | Television                                                                                                                          |                                                                                                                                                               |             | _           |             |

|                                                |                                                                                                                                            |                                                                                                                                                                |       |
|------------------------------------------------|--------------------------------------------------------------------------------------------------------------------------------------------|----------------------------------------------------------------------------------------------------------------------------------------------------------------|-------|
| 121                                            |                                                                                                                                            | Car/tractor/Bajaj                                                                                                                                              | _     |
| 122                                            | Does this household own any livestock, herds, other farm animals, or poultry?                                                              | 1 = Yes<br>0 = No ( <b>Go to→131</b> )                                                                                                                         |       |
| 123                                            | <b>Add the household total for each item</b>                                                                                               | Milk cows, oxen or bulls?                                                                                                                                      | _     |
| 124                                            |                                                                                                                                            | Other cattle?                                                                                                                                                  | _     |
| 125                                            |                                                                                                                                            | Horses, donkeys, or mules?                                                                                                                                     | _     |
| 126                                            |                                                                                                                                            | Camels                                                                                                                                                         | _     |
| 127                                            |                                                                                                                                            | Goats?                                                                                                                                                         | _     |
| 128                                            |                                                                                                                                            | Sheep?                                                                                                                                                         | _     |
| 129                                            |                                                                                                                                            | Chickens or other poultry?                                                                                                                                     | _     |
| 130                                            |                                                                                                                                            | Beehives?                                                                                                                                                      | _     |
| 131                                            | Does any member of this household own any agricultural land?                                                                               | 1 = Yes<br>0 = No                                                                                                                                              | _     |
| 132                                            | How often does anyone smoke inside your house?<br><br><i>Would you say daily, weekly, monthly, less often than once a month, or never?</i> | 1 = Daily<br>2 = Weekly<br>3 = Monthly<br>4 = Less once monthly<br>5 = Never                                                                                   | _     |
| <b>Household head socio-demographic status</b> |                                                                                                                                            |                                                                                                                                                                |       |
| 133                                            | Age in years                                                                                                                               |                                                                                                                                                                | _ _ _ |
| 134                                            | Marital status                                                                                                                             | 1. Single<br>2. Married<br>3. Divorced<br>4. Separated<br>5. Widowed                                                                                           | _     |
| 135                                            | What is the highest level of school the head of the household completed?                                                                   | 1. None<br>2. Primary<br>3. Secondary<br>4. Technical/vocational certificate<br>5. Higher / university/ college<br>98. Don't know<br>99. Other (specify) _____ | _ _ _ |
| 136                                            | What is the religion of the head of the HH?                                                                                                | 1. Orthodox<br>2. Protestant<br>3. Catholic/ other Christian<br>4. Muslim<br>5. No religion<br>98. Don't know<br>99. Other religion (specify) _____            | _ _ _ |
| 137                                            | Ethnicity                                                                                                                                  | Specify                                                                                                                                                        |       |

**Module 2: Child health**

Now I would like to ask some questions about the health of your children born in the last 5 years. We will talk about each separately, starting with the youngest.

|     |                                                                                 |                                                                                                                                                          |       |
|-----|---------------------------------------------------------------------------------|----------------------------------------------------------------------------------------------------------------------------------------------------------|-------|
| 201 | Child's code                                                                    |                                                                                                                                                          | _ _ _ |
| 202 | Mother's name                                                                   | Mother's given name                                                                                                                                      |       |
| 203 | Mother's age                                                                    |                                                                                                                                                          |       |
| 204 | Mother's education level                                                        | 1=None<br>2=Primary<br>3=Secondary<br>4=Technical/vocational certificate<br>5=Higher / university/ college<br>98=Don't know<br>99. Other (specify) _____ |       |
| 205 | Mother's marital status                                                         | 1=Single<br>2 =Married<br>3=Divorced<br>4 =Separated<br>5=Widowed                                                                                        |       |
| 206 | Mother's religion                                                               | 1=Orthodox<br>2=Protestant<br>3=Catholic/ other Christian<br>4=Muslim<br>5=No religion<br>98=Don't know<br>99=Other religion (specify) _____             |       |
| 207 | Mother's ethnicity                                                              | Specify                                                                                                                                                  |       |
| 208 | Child's name                                                                    | Child's given name                                                                                                                                       |       |
| 209 | Child (NAME) sex                                                                | 1 = Boy<br>2 = Girl                                                                                                                                      | _     |
| 210 | Child (NAME) age?                                                               | Age in months or age at the time of the child's death                                                                                                    | _ _ _ |
| 211 | In the last six months, was (NAME) given any vitamin A supplement?              | 1 = Yes<br>0 = No<br>98 = Don't know                                                                                                                     | _ _ _ |
| 212 | When was the child (NAME) given the vitamin A supplement?                       | Specify                                                                                                                                                  |       |
| 213 | In the last 12 months, was (NAME) given any iron tablet or syrup or supplement? | 1 = Yes<br>0 = No<br>98 = Don't know                                                                                                                     | _ _ _ |
| 214 | In the last 6 months, was (name) given any medicine for intestinal worms?       | 1 = Yes<br>0 = No<br>98 = Don't know                                                                                                                     | _ _ _ |
| 215 | In the last 3 months, has any healthcare provider measured?                     | 1 = Yes, 0 = No, 98 = Don't know                                                                                                                         |       |
|     |                                                                                 | Weight                                                                                                                                                   | _ _ _ |
|     |                                                                                 | Height/length                                                                                                                                            | _ _ _ |
|     | MUAC                                                                            |                                                                                                                                                          | _ _ _ |
| 216 | Has (name) had diarrhea in the last 2 weeks?                                    | 1 = Yes<br>0 = No ( <b>Go to 224</b> )                                                                                                                   | _ _ _ |

|     |                                                                                                                                                                                                                      |                                                                                                                                                                                                                                                                                                                                                                                                                                                                                                                                                                                                           |       |
|-----|----------------------------------------------------------------------------------------------------------------------------------------------------------------------------------------------------------------------|-----------------------------------------------------------------------------------------------------------------------------------------------------------------------------------------------------------------------------------------------------------------------------------------------------------------------------------------------------------------------------------------------------------------------------------------------------------------------------------------------------------------------------------------------------------------------------------------------------------|-------|
|     |                                                                                                                                                                                                                      | 98 = Don't know                                                                                                                                                                                                                                                                                                                                                                                                                                                                                                                                                                                           |       |
| 217 | Now I would like to know how much was the child given to drink during diarrhea, including breast milk. Was the child given less than usual to drink, about the same amount, or more than usual to drink?             | 1 = Much less<br>2 = Somewhat less<br>3 = About the same<br>4 = More<br>5 = Nothing to drink<br>98 = Don't know                                                                                                                                                                                                                                                                                                                                                                                                                                                                                           | _     |
| 218 | When the child had diarrhea, was he/she given less than usual to eat, about the same amount, more than usual, or nothing to eat?                                                                                     | 1 = Much less<br>2 = Somewhat less<br>3 = About the same<br>4 = More<br>5 = Nothing to drink<br>98 = Don't know                                                                                                                                                                                                                                                                                                                                                                                                                                                                                           | _     |
| 219 | Did you seek advice or treatment for the diarrhea from any source?                                                                                                                                                   | 1 = Yes<br>0 = No ( <b>Go to 221</b> )                                                                                                                                                                                                                                                                                                                                                                                                                                                                                                                                                                    | _     |
| 220 | Where did you seek advice or treatment? Anywhere else?<br><br><i>Probe to identify the type of source. If unable to determine if public, private, or NGO sector, record '21' and write the name Of the place(s).</i> | 1= Government hospital<br>2= Government health center<br>3= Government health post<br>4 = Mobile clinic<br>5 = Community health worker/ fieldworker<br>6 = Other public sector (specify)<br>7 = Private hospital<br>8 = Private clinic<br>9 = Pharmacy<br>10 = Private doctor<br>11 = Mobile clinic<br>12 = Community health worker/fieldworker<br>13 = Other private medical sector (specify)<br>14 = NGO hospital<br>15 = NGO clinic<br>16 = Other NGO medical sector (specify)<br>17 = Shop<br>18 = Traditional practitioner<br>19 = Market<br>20 = Itinerant drug seller<br>99 = Other (specify)_____ | _ _ _ |
|     | Was (name) given any of the following at any time since (name) started having diarrhea:                                                                                                                              | 1 = Yes, 0 = No, 98 = Don't know                                                                                                                                                                                                                                                                                                                                                                                                                                                                                                                                                                          |       |
| 221 |                                                                                                                                                                                                                      | Fluid from ORS packet                                                                                                                                                                                                                                                                                                                                                                                                                                                                                                                                                                                     | _ _ _ |
| 222 |                                                                                                                                                                                                                      | Zinc                                                                                                                                                                                                                                                                                                                                                                                                                                                                                                                                                                                                      | _ _ _ |
| 223 |                                                                                                                                                                                                                      | Homemade fluid                                                                                                                                                                                                                                                                                                                                                                                                                                                                                                                                                                                            | _ _ _ |
| 224 | Has (name) been ill with a fever at any time in the last 2 weeks?                                                                                                                                                    | 1 = Yes<br>0 = No ( <b>Go to 226</b> )<br>98 = Don't know                                                                                                                                                                                                                                                                                                                                                                                                                                                                                                                                                 | _ _ _ |
| 225 | Where did you seek advice or treatment for                                                                                                                                                                           | 1= Government hospital                                                                                                                                                                                                                                                                                                                                                                                                                                                                                                                                                                                    |       |

|                                                         |                                                                                                                                                                                                                               |                                                                                                                                                                                                                                                                                                                                                                                                                                                                                                                                                                                              |       |
|---------------------------------------------------------|-------------------------------------------------------------------------------------------------------------------------------------------------------------------------------------------------------------------------------|----------------------------------------------------------------------------------------------------------------------------------------------------------------------------------------------------------------------------------------------------------------------------------------------------------------------------------------------------------------------------------------------------------------------------------------------------------------------------------------------------------------------------------------------------------------------------------------------|-------|
|                                                         | fever?<br>Anywhere else?<br><br><i>Probe to identify the type of source.<br/>         If unable to determine if public, private, or<br/>         NGO sector, record '21' and write the name<br/>         Of the place(s).</i> | 2= Government health center<br>3= Government health post<br>4 = Mobile clinic<br>5 = Community health worker/<br>fieldworker<br>6 = Other public sector (specify)<br>7 = Private hospital<br>8 = Private clinic<br>9 = Pharmacy<br>10 = Private doctor<br>11 = Mobile clinic<br>12 = Community health<br>worker/fieldworker<br>13 = Other private medical sector<br>(specify)<br>14 = NGO hospital<br>15 = NGO clinic<br>16 = Other NGO medical sector<br>(specify)<br>17 = Shop<br>18 = Traditional practitioner<br>19 = Market<br>20 = Itinerant drug seller<br>99 = Other (specify) _____ | __ __ |
| 226                                                     | Was Child (Name) ever breastfed?                                                                                                                                                                                              | 1 = Yes<br>0 = No ( <b>Go 228</b> )                                                                                                                                                                                                                                                                                                                                                                                                                                                                                                                                                          | __    |
| 227                                                     | How many months the child (NAME) was breastfed?                                                                                                                                                                               |                                                                                                                                                                                                                                                                                                                                                                                                                                                                                                                                                                                              | __    |
| <b>Anthropometric and clinical nutrition assessment</b> |                                                                                                                                                                                                                               |                                                                                                                                                                                                                                                                                                                                                                                                                                                                                                                                                                                              |       |
| 228                                                     | Weight                                                                                                                                                                                                                        |                                                                                                                                                                                                                                                                                                                                                                                                                                                                                                                                                                                              | __ __ |
| 229                                                     | Height/length                                                                                                                                                                                                                 |                                                                                                                                                                                                                                                                                                                                                                                                                                                                                                                                                                                              | __ __ |
| 230                                                     | MUAC                                                                                                                                                                                                                          |                                                                                                                                                                                                                                                                                                                                                                                                                                                                                                                                                                                              | __ __ |
| 231                                                     | Presence of bilateral oedema for children 6-59 months                                                                                                                                                                         | 1 = Yes<br>0 = No                                                                                                                                                                                                                                                                                                                                                                                                                                                                                                                                                                            | __    |
| 232                                                     | Bitot spot                                                                                                                                                                                                                    | 1 = Yes<br>0 = No                                                                                                                                                                                                                                                                                                                                                                                                                                                                                                                                                                            |       |

**Module 3: Infant and young child feeding practices**

| <b>For children 0-23 months</b>                                                                                                                                                                                        |                                                                                                                                                                                                                                                                                                                                                                                                                                                                            |                                                                                                                                         |       |
|------------------------------------------------------------------------------------------------------------------------------------------------------------------------------------------------------------------------|----------------------------------------------------------------------------------------------------------------------------------------------------------------------------------------------------------------------------------------------------------------------------------------------------------------------------------------------------------------------------------------------------------------------------------------------------------------------------|-----------------------------------------------------------------------------------------------------------------------------------------|-------|
| This module is to be administered to the mother/caregiver of children born 0-23 months before the survey living with respondents. Verify that the respondent you are speaking to is the mother/caregiver of the child. |                                                                                                                                                                                                                                                                                                                                                                                                                                                                            |                                                                                                                                         |       |
| 301                                                                                                                                                                                                                    | Was Child (Name) ever breastfed?                                                                                                                                                                                                                                                                                                                                                                                                                                           | 1 = Yes<br>0 = No ( <b>Go to 304</b> )<br>98 = Don't know                                                                               | _ _ _ |
| 302                                                                                                                                                                                                                    | Was Child (NAME) given the first milk (colostrum) after birth?                                                                                                                                                                                                                                                                                                                                                                                                             | 1 = Yes<br>0 = No<br>98 = Don't know                                                                                                    | _ _ _ |
| 303                                                                                                                                                                                                                    | How long after birth did you first put (NAME) to the breast, even if your breast milk did not arrive?                                                                                                                                                                                                                                                                                                                                                                      | 1 = Immediately after birth, or within 1 hour<br>2 = Between 1 and 24 hours<br>3 = More than 24 hours after delivery<br>98 = Don't know | _ _ _ |
| 304                                                                                                                                                                                                                    | Child (NAME) alive now?                                                                                                                                                                                                                                                                                                                                                                                                                                                    | 1 = Yes<br>0 = No ( <b>Go to 401</b> )                                                                                                  | _ _ _ |
| 305                                                                                                                                                                                                                    | Was (NAME) breastfed yesterday from sunrise until today sunrise?<br>NB: Breastfeeding could be by the mother herself or by wet mother.                                                                                                                                                                                                                                                                                                                                     | 1 = Yes<br>0 = No ( <b>Go to 307</b> )<br>98 = Don't know                                                                               | _ _ _ |
| 306                                                                                                                                                                                                                    | <i>Sometimes babies are fed breast milk in different ways, for example by spoon, cup or bottle. This can happen when the mother cannot always be with her baby. Sometimes babies are breastfed by another woman, or given breast milk from another woman by spoon, cup or bottle or some other way. This can happen if a mother cannot breastfeed her own baby.</i><br><br>Did (NAME) consume breast milk in any of these ways yesterday from sunrise until today sunrise? | 1 = Yes<br>0 = No<br>98 = Don't know                                                                                                    | _ _ _ |
| 307                                                                                                                                                                                                                    | Now I would like to ask you about some medicines and vitamins that are sometimes given to infants.<br><br>Was (NAME) given any vitamin drops or other medicines as drops yesterday from sunrise until today sunrise?                                                                                                                                                                                                                                                       | 1 = Yes<br>0 = No<br>98 = Don't know                                                                                                    | _ _ _ |
| 308                                                                                                                                                                                                                    | Was (NAME) given Lemlem or ORS in the last two weeks?                                                                                                                                                                                                                                                                                                                                                                                                                      | 1 = Yes<br>0 = No<br>98 = Don't know                                                                                                    | _ _ _ |

|                                                                                                                                                                                                                                                                                                                                                                                                                                                                                                                                                                                                                         |                                                                                                                                                                                                          |                                                                                                    |                   |
|-------------------------------------------------------------------------------------------------------------------------------------------------------------------------------------------------------------------------------------------------------------------------------------------------------------------------------------------------------------------------------------------------------------------------------------------------------------------------------------------------------------------------------------------------------------------------------------------------------------------------|----------------------------------------------------------------------------------------------------------------------------------------------------------------------------------------------------------|----------------------------------------------------------------------------------------------------|-------------------|
| 309                                                                                                                                                                                                                                                                                                                                                                                                                                                                                                                                                                                                                     | In the last 6 months, did any healthcare provider or community health worker talk with you about how and what to feed your child?                                                                        | 1 = Yes<br>0 = No<br>98 = Don't know                                                               | _ _ _             |
| 310                                                                                                                                                                                                                                                                                                                                                                                                                                                                                                                                                                                                                     | Now, I would like to ask you about some liquids that (NAME) may have had yesterday from sunrise until today sunrise?<br><br><b>If yes to Q310, read the list of liquids starting with 'plain water'.</b> | Did (NAME) have any (item from list)?<br>1 = Yes<br>0 = No ( <b>Go to 321</b> )<br>98 = Don't know | _ _ _             |
| 311                                                                                                                                                                                                                                                                                                                                                                                                                                                                                                                                                                                                                     | Plain water                                                                                                                                                                                              | 1 = Yes<br>0 = No<br>98 = Don't know                                                               | _ _ _             |
| 312                                                                                                                                                                                                                                                                                                                                                                                                                                                                                                                                                                                                                     | Infant formula such as S-26?                                                                                                                                                                             | 1 = Yes<br>0 = No ( <b>Go to 314</b> )<br>98 = Don't know                                          | _ _ _             |
| 313                                                                                                                                                                                                                                                                                                                                                                                                                                                                                                                                                                                                                     | How many times infant formula such as S-26?                                                                                                                                                              |                                                                                                    | _ _ _             |
| 314                                                                                                                                                                                                                                                                                                                                                                                                                                                                                                                                                                                                                     | Milk such as tinned, powdered, or fresh animal milk?                                                                                                                                                     | 1 = Yes<br>0 = No ( <b>Go to 316</b> )<br>98 = Don't know                                          | _ _ _             |
| 315                                                                                                                                                                                                                                                                                                                                                                                                                                                                                                                                                                                                                     | How many times milk drink?                                                                                                                                                                               |                                                                                                    | _ _ _             |
| 316                                                                                                                                                                                                                                                                                                                                                                                                                                                                                                                                                                                                                     | Yogurt drink?                                                                                                                                                                                            | 1 = Yes<br>0 = No<br>98 = Don't know                                                               | _ _ _             |
| 317                                                                                                                                                                                                                                                                                                                                                                                                                                                                                                                                                                                                                     | Chocolate flavored drink?                                                                                                                                                                                | 1 = Yes<br>0 = No<br>98 = Don't know                                                               | _ _ _             |
| 318                                                                                                                                                                                                                                                                                                                                                                                                                                                                                                                                                                                                                     | Sodas, malt drinks or energy drinks?                                                                                                                                                                     | 1 = Yes<br>0 = No<br>98 = Don't know                                                               | _ _ _             |
| 319                                                                                                                                                                                                                                                                                                                                                                                                                                                                                                                                                                                                                     | Clear broth or clear soup?                                                                                                                                                                               | 1 = Yes<br>0 = No<br>98 = Don't know                                                               | _ _ _             |
| 320                                                                                                                                                                                                                                                                                                                                                                                                                                                                                                                                                                                                                     | Any other liquids?                                                                                                                                                                                       | 1 = Yes<br>0 = No<br>98 = Don't know                                                               | _ _ _             |
| <p>Now I would like to ask you about foods that (NAME) had yesterday during the day or night. I am interested in foods your child ate whether at home or somewhere else. I will ask you about different types of foods, and I would like to know whether your child ate the food even if it was combined with other foods. Please do not answer 'yes' for any food or ingredient used in a small amount to add flavor to a dish.</p> <p>OTHER FOODS: Please write down other foods in this box that respondent mentioned but are not in the list below</p> <p>Yesterday during the day or at night, did (NAME) eat:</p> |                                                                                                                                                                                                          |                                                                                                    |                   |
| 321                                                                                                                                                                                                                                                                                                                                                                                                                                                                                                                                                                                                                     | Did the child ate any solid or semi-solid food yesterday?                                                                                                                                                |                                                                                                    | Eaten?<br>1 = Yes |



|     |                                                                                                                            |                                                 | 0 = No ( <b>Go to 342</b> )<br>98 = Don't know |
|-----|----------------------------------------------------------------------------------------------------------------------------|-------------------------------------------------|------------------------------------------------|
| 322 | Yogurt, other than yogurt drink?                                                                                           |                                                 | __                                             |
| 323 | How many times did child (NAME) eat yogurt?                                                                                |                                                 | __                                             |
| 324 | Injera, bread, rice, noodles, pasta, macaroni, porridge, or other foods made from grains such as tef, oats, maize, barley? |                                                 | __                                             |
| 325 | Any commercially fortified baby food like Fafa, Hilina, Cerilak, Cerifam, Mother Choice?                                   |                                                 |                                                |
| 326 | Pumpkin, carrots, squash, or sweet potatoes that are yellow or orange inside?                                              |                                                 | __                                             |
| 327 | White potatoes, white yams, bulla, kocho, manioc, cassava or any other foods made from roots?                              |                                                 | __                                             |
| 328 | Any dark green leafy vegetables (kale, dark green lettuce, moringa ...)?                                                   |                                                 | __                                             |
| 329 | Any other vegetable?                                                                                                       |                                                 |                                                |
| 330 | Ripe mangoes, ripe papayas (insert other local vitamin a-rich fruits)?                                                     |                                                 | __                                             |
| 331 | Any other fruit?                                                                                                           |                                                 | __                                             |
| 332 | Liver, kidney, heart, or other organ meats?                                                                                |                                                 | __                                             |
| 333 | Any meat, such as beef, pork, lamb, goat, chicken?                                                                         |                                                 | __                                             |
| 334 | Egg?                                                                                                                       |                                                 | __                                             |
| 335 | Fresh or dried fish, shellfish, or seafood?                                                                                |                                                 | __                                             |
| 336 | Any foods made from beans, peas, lentils, nuts, or seeds?                                                                  |                                                 | __                                             |
| 337 | Cheese or other food made from milk?                                                                                       |                                                 | __                                             |
| 338 | Any sugary foods such as chocolates, sweets, candies, pastries, cakes, or biscuits                                         |                                                 | __                                             |
| 339 | Any savory junk foods, such as crisps/chips/salted biscuits/instant noodles?                                               |                                                 | __                                             |
| 340 | Any other solid, semi-solid, or soft food?                                                                                 |                                                 | __                                             |
| 341 | How many times did (NAME) eat solid, semi-solid, or soft foods other than liquids yesterday during the day or at night?    | Fill in the number of times.<br>98 = Don't know | _ _ _                                          |
| 342 | Did (NAME) drink anything from a bottle with a nipple yesterday during the day or night?                                   | 1 = Yes<br>0 = No<br>98 = Don't know            | _ _ _                                          |

**Module 4: KAP of mothers or caregivers on children's care and feeding**

| I am going to read you some knowledge questions about breastfeeding. Please tell me your answers on these questions. |                                                                                                                                       |                                                                                                                                                                                                                        |       |
|----------------------------------------------------------------------------------------------------------------------|---------------------------------------------------------------------------------------------------------------------------------------|------------------------------------------------------------------------------------------------------------------------------------------------------------------------------------------------------------------------|-------|
| 401                                                                                                                  | How long after birth should a baby start breastfeeding?                                                                               | 1 = Immediately, within 1 hour of delivery<br>2 = Some hours later but within 24 hours<br>3 = After 1 day<br>4 = After 2 days<br>5 = After >3 days<br>6 = Does not think a baby should be breastfed<br>98 = Don't know | _ _ _ |
| 402                                                                                                                  | How long should a baby receive nothing other than breast milk?                                                                        | 1 = From birth to six months<br>2 = Other<br>98 = Don't know                                                                                                                                                           | _ _ _ |
| 403                                                                                                                  | How often should a baby younger than six months be breastfed or fed with breast milk?                                                 | 1 = On-demand, whenever the baby wants<br>2 = Other<br>98 = Don't know                                                                                                                                                 | _ _ _ |
| 404                                                                                                                  | How much should a child be fed when he/she is sick?                                                                                   | 1 = Less frequent than usual<br>2 = Same as usual<br>3 = More than usual<br>98 = Don't know                                                                                                                            | _ _ _ |
| 405                                                                                                                  | How often should a child be fed when he/she is sick?                                                                                  | 1 = Less frequently than usual<br>2 = Same as usual<br>3 = More frequently than usual<br>98 = Don't know                                                                                                               | _ _ _ |
| 406                                                                                                                  | At what age should a baby first start to receive foods in addition to breast milk?                                                    | Months of age (Specify)<br>98= Don't know                                                                                                                                                                              | _ _ _ |
| 407                                                                                                                  | At what age should children begin observing fasting days if that is their culture or religion?<br>(If <2 years, enter age in months.) | Years of age (Specify)<br>98=Don't know/remember                                                                                                                                                                       | _ _ _ |
| 408                                                                                                                  | Have you ever heard of child stunting?                                                                                                | 1 = Yes<br>0 = No<br>98 = Don't know                                                                                                                                                                                   | _ _ _ |
| 409                                                                                                                  | What age are children at the highest risk of becoming stunted?                                                                        | Years of age (Specify)<br>Months of age (Specify)<br>98 = Don't know/remember                                                                                                                                          | _ _ _ |
| 410                                                                                                                  | What are the consequences of stunting for young children?<br>Mark all that are mentioned by the respondent                            | 1 = Higher risk of severe infectious diseases<br>2 = Poor educational performance<br>3 = Weaker immune system<br>4 = Low adult wages<br>5 = Lost productivity<br>6 = Excessive weight gain in later life               | _ _ _ |

|                                                                                                                                                                                                                                                                              |                                                                                                                          |                                                                                                                                        |       |
|------------------------------------------------------------------------------------------------------------------------------------------------------------------------------------------------------------------------------------------------------------------------------|--------------------------------------------------------------------------------------------------------------------------|----------------------------------------------------------------------------------------------------------------------------------------|-------|
|                                                                                                                                                                                                                                                                              |                                                                                                                          | 7 = Increased risk of nutrition-related chronic diseases in adult life<br>8 = Increased mortality rate<br>98= Don't know<br>99 = Other |       |
| 411                                                                                                                                                                                                                                                                          | Poor diet during pregnancy and the first two years of child age can cause child stunting                                 | 1 = Agree<br>2 = Do not agree<br>98 = Don't know                                                                                       | _ _ _ |
| I am going to read you some statements about breastfeeding and complementary feeding made by other mothers who live in a community like yours. Please tell me if you agree with these statements. Remember, there are no correct answers! I would like to know your opinion. |                                                                                                                          |                                                                                                                                        |       |
| 412                                                                                                                                                                                                                                                                          | The colostrum (the "first yellowish milk") is not good for the baby and should be discarded                              | 1 = Strongly disagree<br>2 = Disagree<br>3 = Agree somewhat<br>4 = Agree<br>5 = Strongly agree<br>98 = Don't know                      | _ _ _ |
| 413                                                                                                                                                                                                                                                                          | It is good to exclusively breastfeed give a baby only breast milk and no other foods or liquids for the first six months | 1 = Strongly disagree<br>2 = Disagree<br>3 = Agree somewhat<br>4 = Agree<br>5 = Strongly agree<br>98 = Don't know                      | _ _ _ |
| 414                                                                                                                                                                                                                                                                          | If a child is sick (for example has fever/diarrhea) breastfeeding must be continued                                      | 1 = Strongly disagree<br>2 = Disagree<br>3 = Agree somewhat<br>4 = Agree<br>5 = Strongly agree<br>98 = Don't know                      | _ _ _ |
| 415                                                                                                                                                                                                                                                                          | A child should eat eggs, cow milk, or meat even on fasting days                                                          | 1 = Strongly disagree<br>2 = Disagree<br>3 = Agree somewhat<br>4 = Agree<br>5 = Strongly agree<br>98 = Don't know                      | _ _ _ |
| 416                                                                                                                                                                                                                                                                          | Eating a meal from different food groups is not necessary until children are old enough to go to school                  | 1 = Strongly disagree<br>2 = Disagree<br>3 = Agree somewhat<br>4 = Agree<br>5 = Strongly agree<br>98 = Don't know                      | _ _ _ |
| 417                                                                                                                                                                                                                                                                          | It is good to feed a two years child at least four times each day                                                        | 1 = Strongly disagree<br>2 = Disagree<br>3 = Agree somewhat<br>4 = Agree<br>5 = Strongly agree<br>98 = Don't know                      | _ _ _ |
| 418                                                                                                                                                                                                                                                                          | A mother should eat nutritious food                                                                                      | 1 = Strongly disagree                                                                                                                  | _ _ _ |

|     |                                                               |                                                                                                                   |       |
|-----|---------------------------------------------------------------|-------------------------------------------------------------------------------------------------------------------|-------|
|     | (four) times daily from the time of pregnancy                 | 2 = Disagree<br>3 = Agree somewhat<br>4 = Agree<br>5 = Strongly agree<br>98 = Don't know                          |       |
| 419 | A mother should take iron folic acid tablets during pregnancy | 1 = Strongly disagree<br>2 = Disagree<br>3 = Agree somewhat<br>4 = Agree<br>5 = Strongly agree<br>98 = Don't know | _ _ _ |
| 420 | A mother should take iodized salt during pregnancy            | 1 = Strongly disagree<br>2 = Disagree<br>3 = Agree somewhat<br>4 = Agree<br>5 = Strongly agree<br>98 = Don't know | _ _ _ |
| 421 | A mother should take de-worming medicines during pregnancy    | 1 = Strongly disagree<br>2 = Disagree<br>3 = Agree somewhat<br>4 = Agree<br>5 = Strongly agree<br>98 = Don't know | _ _ _ |

**Module 5: Adolescent girls (10-19 Years)**

|                                                                                                                                                                                                                                                    |                                                                                                                    |                                                                                                                                     |       |
|----------------------------------------------------------------------------------------------------------------------------------------------------------------------------------------------------------------------------------------------------|--------------------------------------------------------------------------------------------------------------------|-------------------------------------------------------------------------------------------------------------------------------------|-------|
| Hint; This section is administered for Adolescent girls 10-19 years old. Provide a paper copy of both the informed consent and Assent Form to the respondent Read the consent (for mothers of adolescent girls) and Assent (adolescent girls) form |                                                                                                                    |                                                                                                                                     |       |
| 501                                                                                                                                                                                                                                                | Girl's code                                                                                                        |                                                                                                                                     | _ _ _ |
| 502                                                                                                                                                                                                                                                | Girl's name                                                                                                        | Given name                                                                                                                          |       |
| 503                                                                                                                                                                                                                                                | Girl's age                                                                                                         |                                                                                                                                     |       |
| 504                                                                                                                                                                                                                                                | Girl's education level                                                                                             | 1=None<br>1=Primary<br>2=Secondary<br>3=Technical/vocational certificate<br>98=Don't know<br>99=Other (specify)                     |       |
| 505                                                                                                                                                                                                                                                | Girl's marital status                                                                                              | 1 = Single<br>2 = Married<br>3 = Divorced<br>4 = Separated<br>5 = Widowed                                                           |       |
| 506                                                                                                                                                                                                                                                | Girl's religion                                                                                                    | 1=Orthodox<br>2=Protestant<br>3=Catholic/ other Christian<br>4=Muslim<br>5=No religion<br>98=Don't know<br>Other religion (specify) |       |
| 507                                                                                                                                                                                                                                                | Girl's ethnicity                                                                                                   | specify                                                                                                                             |       |
| 508                                                                                                                                                                                                                                                | Are you currently a student                                                                                        | 1 = Yes<br>0 = No                                                                                                                   | _     |
| 509                                                                                                                                                                                                                                                | Were you given any iron/folate tablets at school or out of school? ( <b>show the tablet</b> )                      | 1 = Yes<br>0 = No ( <b>Go to 511</b> )                                                                                              | _     |
| 510                                                                                                                                                                                                                                                | How many weeks per month have you taken the iron tablets?                                                          | Weeks per month (specify)<br>98 = don't know                                                                                        | _ _ _ |
| 511                                                                                                                                                                                                                                                | Were you given any drug for intestinal worms at school or out of school in the last six months?                    | 1 = Yes<br>0 = No                                                                                                                   | _     |
| 512                                                                                                                                                                                                                                                | Have you received any nutrition counseling in the last six months?                                                 | 1 = Yes<br>0 = No                                                                                                                   | _     |
| 513                                                                                                                                                                                                                                                | Did you receive nutritional assessment services in health facilities when you went for any kind of health service? | 1 = Yes<br>0 = No                                                                                                                   | _     |
| 514                                                                                                                                                                                                                                                | Is there any food taboo for adolescent girls in your community?                                                    | 1 = Yes<br>0 = No ( <b>Go to 516</b> )                                                                                              | _     |
| 515                                                                                                                                                                                                                                                | Mention types of food taboo?                                                                                       |                                                                                                                                     |       |
| Anthropometry and clinical nutrition assessment                                                                                                                                                                                                    |                                                                                                                    |                                                                                                                                     |       |
| 516                                                                                                                                                                                                                                                | Weight (in kg)                                                                                                     |                                                                                                                                     |       |
| 517                                                                                                                                                                                                                                                | Height (in CM)                                                                                                     |                                                                                                                                     |       |
| 518                                                                                                                                                                                                                                                | Waist circumference (in CM)                                                                                        |                                                                                                                                     |       |

|     |        |                 |
|-----|--------|-----------------|
| 519 | Goiter | 1 = Yes, 0 = No |
|-----|--------|-----------------|

**Module 6: Reproductive age women (15-49 Years)**

| For currently pregnant women |                                                                                              |                                                                                                                                                                                                 |       |
|------------------------------|----------------------------------------------------------------------------------------------|-------------------------------------------------------------------------------------------------------------------------------------------------------------------------------------------------|-------|
| 601                          | Woman's code                                                                                 |                                                                                                                                                                                                 |       |
| 602                          | Woman's name                                                                                 | Given name                                                                                                                                                                                      |       |
| 603                          | Woman's age                                                                                  |                                                                                                                                                                                                 |       |
| 604                          | Woman's education level                                                                      | 1=None<br>2=Primary<br>3=Secondary<br>4=Technical/vocational certificate<br>5=Higher / university/ college<br>98=Don't know<br>99=Other (specify)                                               |       |
| 605                          | Woman's marital status                                                                       | 1 = Single<br>2 = Married<br>3 = Divorced<br>4 = Separated<br>5 = Widowed                                                                                                                       |       |
| 606                          | Woman's religion                                                                             | 1=Orthodox<br>2=Protestant<br>3=Catholic/ other Christian<br>4=Muslim<br>5=No religion<br>98=Don't know<br>99=Other religion (specify)                                                          |       |
| 607                          | Woman's ethnicity                                                                            | Specify                                                                                                                                                                                         |       |
| 608                          | What was your age at first marriage                                                          | Year (specify)<br>96=Not applicable<br>98=Don't know                                                                                                                                            | _ _ _ |
| 609                          | What was your age at your first pregnancy                                                    | Year (specify)<br>96=Not applicable<br>98=Don't know                                                                                                                                            | _ _ _ |
| 610                          | Were you pregnant in the last 3 years?                                                       | 1= Yes<br>0=No ( <b>Go to 629</b> )                                                                                                                                                             |       |
| 611                          | Did you see anyone for antenatal care for the pregnancy?                                     | 1 = Yes<br>0 = No ( <b>Go to 629</b> )                                                                                                                                                          | _     |
| 612                          | Whom did you see for antenatal care?<br>Probe to identify each type of person and record all | 1=Health personnel<br>2 = Doctor<br>3 = Nurse<br>4 = Midwife<br>5= Health officer<br>6 = Health extension worker<br>7 = Other person<br>8 = Traditional birth Attendant<br>99 = Other (specify) | _ _ _ |
| 613                          | Where did you receive antenatal care for this pregnancy?<br>Anywhere else?                   | 1= My home<br>2 = Her home<br>3 = Other home<br>4 = Health center                                                                                                                               | _ _ _ |

|     |                                                                                                                                                         |                                                                                                                                                                                                                                 |                                          |
|-----|---------------------------------------------------------------------------------------------------------------------------------------------------------|---------------------------------------------------------------------------------------------------------------------------------------------------------------------------------------------------------------------------------|------------------------------------------|
|     |                                                                                                                                                         | 5 = Government Hospital<br>6 = Private Clinic or Hospital<br>7 = Health post<br>8 = NGO clinic or hospital<br>99 = Other SPECIFY                                                                                                |                                          |
| 614 | How many months pregnant were you when you first received antenatal care for this pregnancy?                                                            | Months (Specify)<br>98 = Don't know                                                                                                                                                                                             | _ _ _                                    |
| 615 | How many times did you receive antenatal care during this pregnancy?                                                                                    | Number of times (specify)<br>98 = Don't know                                                                                                                                                                                    | _ _ _                                    |
| 616 | As part of your antenatal care during this pregnancy, were any of the following done at least once:                                                     | 1 = Yes 0 = No                                                                                                                                                                                                                  |                                          |
|     |                                                                                                                                                         | Was your blood pressure measured?                                                                                                                                                                                               | _                                        |
|     |                                                                                                                                                         | Did you give a urine sample?                                                                                                                                                                                                    | _                                        |
|     |                                                                                                                                                         | Did you give a blood sample?                                                                                                                                                                                                    | _                                        |
|     |                                                                                                                                                         | Did a health care provider talk with you about which foods to eat while pregnant?                                                                                                                                               | _                                        |
|     |                                                                                                                                                         | Did a health care provider weigh you?                                                                                                                                                                                           | _                                        |
|     |                                                                                                                                                         | Did a health care provider talk with you about your weight?                                                                                                                                                                     | _                                        |
| 617 | During this pregnancy, did you ever receive food or cash assistance from government, an NGO, religious institution or other group?                      | 1 = Yes<br>0 = No ( <b>Go to 619</b> )                                                                                                                                                                                          | _                                        |
|     |                                                                                                                                                         | 618                                                                                                                                                                                                                             | What type of assistance did you receive? |
| 619 | During this pregnancy, were you given or did you buy any iron tablets or iron syrup?<br><br><b>show tablets/syrup/multiple micronutrient supplement</b> | 1 = Yes<br>0 = No ( <b>Go to 622</b> )<br>98 = Don't Know ( <b>Go to 622</b> )                                                                                                                                                  | _ _ _                                    |
| 620 | Where did you get the iron tablet or syrup from?                                                                                                        | 1 = Govt. Health Facility<br>2 = Private Health Facility<br>3 = Mobile Clinic<br>4 = CHW<br>5 = [Mass Distribution Campaign – Add Local Name]<br>6 = Pharmacy<br>7 = Shop/Market<br>8 = School<br>98 = Don't Know<br>99 = Other | _ _ _                                    |
| 621 | During this pregnancy, for how many days did you take the iron tablets?<br><b>If answer is not numeric, probe for</b>                                   | Number of days (specify)<br>98 = Don't Know                                                                                                                                                                                     | _ _ _                                    |



|                      |                                                                                              |                                                           |       |
|----------------------|----------------------------------------------------------------------------------------------|-----------------------------------------------------------|-------|
|                      | <b>approximate number of days.</b>                                                           |                                                           |       |
| 622                  | During this pregnancy, did you take any drug for intestinal worms?                           | 1 = Yes<br>0 = No<br>98 = Don't Know                      | _ _ _ |
| 623                  | During this pregnancy, did any health care provider talk with you about breastfeeding?       | 1 = Yes<br>0 = No<br>98 = Don't Know                      | _ _ _ |
| 624                  | During this pregnancy, did you practice fasting?                                             | 1 = Yes<br>0 = No<br>98 = Don't Know                      | _ _ _ |
| 625                  | At your last ANC visit, did the health provider weigh you?                                   | 1 = Yes<br>0 = No<br>98 = Don't Know                      | _ _ _ |
| 626                  | During this pregnancy has your health provider given you information about your weight gain? | 1 = Yes<br>0 = No ( <b>Go to 629</b> )<br>98 = Don't Know | _ _ _ |
| 627                  | During your pregnancy have you been thin for your height?                                    | 1 = Yes<br>0 = No<br>98 = Don't Know                      | _ _ _ |
| 628                  | Did you received treatment for malnutrition?                                                 | 1 = Yes<br>0 = No                                         | _ _ _ |
| <b>Anthropometry</b> |                                                                                              |                                                           |       |
| 629                  | Weight (in kg)                                                                               |                                                           |       |
| 630                  | Height (in CM)                                                                               |                                                           |       |
| 631                  | MUAC                                                                                         |                                                           |       |
| 632                  | Waist circumference (in cm)                                                                  |                                                           |       |
| 633                  | Goiter                                                                                       | 1 = Yes<br>0 = No                                         |       |

**Module 7: Women Dietary Diversity**

| "Now I'd like to ask you about foods and drinks that you ate or drank yesterday during the day or night, whether you ate it at home or anywhere else. |                                                                                                                                                                                            |                                                                                                                                                   |
|-------------------------------------------------------------------------------------------------------------------------------------------------------|--------------------------------------------------------------------------------------------------------------------------------------------------------------------------------------------|---------------------------------------------------------------------------------------------------------------------------------------------------|
| Yesterday, during the day or at night did you eat or drink:                                                                                           |                                                                                                                                                                                            |                                                                                                                                                   |
| S.N                                                                                                                                                   | Question                                                                                                                                                                                   | Response<br>1 = Yes<br>0 = No                                                                                                                     |
| 701                                                                                                                                                   | Woman's code                                                                                                                                                                               |                                                                                                                                                   |
| 702                                                                                                                                                   | Woman's name                                                                                                                                                                               | Given name                                                                                                                                        |
| 703                                                                                                                                                   | Woman's age                                                                                                                                                                                |                                                                                                                                                   |
| 704                                                                                                                                                   | Woman's education level                                                                                                                                                                    | 0=None<br>1=Primary<br>2=Secondary<br>3=Technical/vocational certificate<br>4=Higher / university/ college<br>98=Don't know<br>99=Other (specify) |
| 705                                                                                                                                                   | Woman's marital status                                                                                                                                                                     | 1= Single<br>2= Married<br>3= Divorced<br>4= Separated<br>5= Widowed                                                                              |
| 706                                                                                                                                                   | Woman's religion                                                                                                                                                                           | 1=Orthodox<br>2=Protestant<br>3=Catholic/other Christian<br>4=Muslim<br>5=No religion<br>98=Don't know<br>99=Other religion (specify)             |
| 707                                                                                                                                                   | Woman's ethnicity                                                                                                                                                                          | Specify                                                                                                                                           |
| 708                                                                                                                                                   | Any vegetables or roots that are orange-colored inside, like: pumpkin, carrots, squash, or sweet potatoes that are yellow or orange inside                                                 | __                                                                                                                                                |
| 709                                                                                                                                                   | Any white roots and tubers or plantains, such as: white potatoes, white yams, manioc/cassava/yucca, cocoyam, taro or any other foods made from white-fleshed roots or tubers, or plantains | __                                                                                                                                                |
| 710                                                                                                                                                   | Any dark green leafy vegetables, such as: [list examples of any medium-to-dark green leafy vegetables including wild/foraged leaves]                                                       | __                                                                                                                                                |
| 711                                                                                                                                                   | Any fruits that are dark yellow or orange inside, like: ripe mango, ripe papaya                                                                                                            | __                                                                                                                                                |
| 712                                                                                                                                                   | Any other fruits                                                                                                                                                                           | __                                                                                                                                                |
| 713                                                                                                                                                   | Any other vegetables                                                                                                                                                                       | __                                                                                                                                                |
| 714                                                                                                                                                   | Any meat made from animal organs, such as: liver, kidney, heart or other organ meats or blood-based foods, including from wild game                                                        | __                                                                                                                                                |
| 715                                                                                                                                                   | Any other types of meat or poultry, like: beef, pork, lamb, goat, rabbit, wild game meat, chicken, duck, other birds                                                                       | __                                                                                                                                                |

|     |                                                                                                                                                                                         |   |
|-----|-----------------------------------------------------------------------------------------------------------------------------------------------------------------------------------------|---|
| 716 | Any eggs                                                                                                                                                                                | _ |
| 717 | Any fish or seafood, whether fresh or dried                                                                                                                                             | _ |
| 718 | Any beans or peas, such as: mature beans or peas (fresh or dried seed), lentils, or bean/pea products, including hummus, tofu and tempeh                                                | _ |
| 719 | Any nuts or seeds, like tree nut, groundnut/peanut, or certain seeds or nut/seed “butters” or pastes                                                                                    | _ |
| 720 | Any milk or milk products, such as: milk, cheese, yoghurt or other milk products, but not including butter, ice cream, cream or sour cream                                              | _ |
| 721 | Any oils and fats                                                                                                                                                                       | _ |
| 722 | Any savory and fried snacks, such as: crisps and chips, fried dough, other fried snacks                                                                                                 | _ |
| 723 | Any sweets, such as: sugary foods, such as chocolates, candies, cookies/sweet biscuits and cakes, sweet pastries or ice cream                                                           | _ |
| 724 | Any sugar-sweetened beverages, like: sweetened fruit juices and “juice drinks”, soft drinks/fizzy drinks, chocolate drinks, malt drinks, yoghurt drinks, sweet tea or coffee with sugar | _ |
| 725 | Any condiments and seasonings, such as: ingredients used in small quantities for flavour, such as chilies, spices, herbs, fish powder, tomato paste, flavor cubes or seeds              | _ |
| 726 | Any other beverages and foods like tela, tej, bordea, arkea, cheka, tselo                                                                                                               | _ |
| 727 | Did you eat anything (meal or snack) OUTSIDE of the home yesterday?                                                                                                                     | _ |
| 728 | Did you fast yesterday during the day or night?                                                                                                                                         | _ |

**Module 8: SELF-REPORTING QUESTIONNAIRE (SRQ-20)**

| No  | Question                                                 | Answer<br>1 = Yes<br>0 = No |    |
|-----|----------------------------------------------------------|-----------------------------|----|
| 801 | Do you often have headaches?                             |                             | __ |
| 802 | Is your appetite poor?                                   |                             | __ |
| 803 | Do you sleep badly?                                      |                             | __ |
| 804 | Are you easily frightened?                               |                             | __ |
| 805 | Do your hands shake?                                     |                             | __ |
| 806 | Do you feel nervous, tense or worried?                   |                             | __ |
| 807 | Is your digestion poor?                                  |                             | __ |
| 808 | Do you have trouble thinking clearly?                    |                             | __ |
| 809 | Do you feel unhappy?                                     |                             | __ |
| 810 | Do you cry more than usual?                              |                             | __ |
| 811 | Do you find it difficult to enjoy your daily activities? |                             | __ |
| 812 | Do you find it difficult to make decisions?              |                             | __ |
| 813 | Is your daily work suffering?                            |                             | __ |
| 814 | Are you unable to play a useful part in life?            |                             | __ |
| 815 | Have you lost interest in things?                        |                             | __ |
| 816 | Do you feel that you are a worthless person?             |                             | __ |
| 817 | Has the thought of ending your life been on your mind?   |                             | __ |
| 818 | Do you feel tired all the time?                          |                             | __ |
| 819 | Do you have uncomfortable feelings in your stomach?      |                             | __ |
| 820 | Are you easily tired?                                    |                             | __ |

## Module 9: Women empowerment

|     |                                                                                                                                                               |                                                                             |       |
|-----|---------------------------------------------------------------------------------------------------------------------------------------------------------------|-----------------------------------------------------------------------------|-------|
| 901 | Identify the most senior mother of the mothers who have a selected child. She is the mother who should respond to the rest of this interview from this point. |                                                                             | _ _ _ |
| 902 | In the past major growing season (Meher) and minor growing (Belg) season, not including the current season, did you work on the family farm?                  | 1 = Yes<br>0 = No → Go to 913)                                              | _     |
| 903 | What sort of work you did on the family farm?                                                                                                                 | 1 = Home (kitchen) gardening                                                | _     |
| 904 |                                                                                                                                                               | 2 = Fieldwork                                                               | _     |
| 905 |                                                                                                                                                               | 3 = Cash crop farming                                                       | _     |
| 906 |                                                                                                                                                               | 4 = Dairy processing                                                        | _     |
| 907 |                                                                                                                                                               | 5 = Poultry rearing                                                         | _     |
| 908 |                                                                                                                                                               | 6 = Raising livestock                                                       | _     |
| 909 |                                                                                                                                                               | 7 = Fishpond/ aquaculture                                                   | _     |
| 910 |                                                                                                                                                               | 99 = Other (specify)                                                        | _     |
| 911 | From the work that you did on the farm did your household earn any money?                                                                                     | 1 = Yes<br>0 = No<br>98 = Don't know                                        | _     |
| 912 | Who usually decides how the money you earn will be used?<br><br><b>READ THE LIST.</b>                                                                         | 1 = Self<br>2 = Husband<br>3 = Self and husband jointly<br>4 = Someone else | _     |
| 913 | Who usually makes decisions about major household purchases/sell such as cattle or livestock?<br><br><b>READ THE LIST.</b>                                    | 1 = Self<br>2 = Husband<br>3 = Self and husband jointly<br>4 = Someone else | _     |
| 914 | Who usually makes decisions about minor household purchases/sell such as spices/oils, soap, utensils, or daily household needs?<br><br><b>READ THE LIST.</b>  | 1 = Self<br>2 = Husband<br>3 = Self and husband jointly<br>4 = Someone else | _     |
| 915 | Who usually makes decisions about health care for your children?<br><br><b>READ THE LIST.</b>                                                                 | 1 = Self<br>2 = Husband<br>3 = Self and husband jointly<br>4 = Someone else | _     |
| 916 | Do you have husband?                                                                                                                                          | 1 = Yes<br>0 = No ( <b>Go to 918</b> )                                      | _     |
| 917 | Who usually decides how the money your husband earns will be used?<br><br><b>READ THE LIST.</b>                                                               | 1 = Self<br>2 = Husband<br>3 = Self and husband jointly<br>4 = Someone else |       |

|     |                                                                                                                                                |                                                         |   |
|-----|------------------------------------------------------------------------------------------------------------------------------------------------|---------------------------------------------------------|---|
| 918 | Do you have children?                                                                                                                          | 1 = Yes<br>0 = No ( <b>Go to 923</b> )                  |   |
| 919 | Does your husband help you care for the children?                                                                                              | 1 = Yes<br>0 = No ( <b>Go to 923</b> )                  | _ |
| 920 | Does he help care for the children almost every day, at least once a week, or rarely?                                                          | 1 = Every day<br>2 = At least once a week<br>3 = Rarely | _ |
| 921 | Does your husband help you with household chores like cooking, cleaning the house, fetching water, collecting firewood or other domestic work? | 1 = Yes<br>0 = No ( <b>Go to 923</b> )                  | _ |
| 922 | Does he help almost every day, at least once a week, or rarely?                                                                                | 1 = Every day<br>2 = At least once a week<br>3 = Rarely | _ |

|     |                                                                                                                             |                                                                                |                                      |       |
|-----|-----------------------------------------------------------------------------------------------------------------------------|--------------------------------------------------------------------------------|--------------------------------------|-------|
| 923 | At any time during the previous major seasons (Meher) and minor season (Belg) not including the current season,<br>Did you: | Use improved seed varieties for any of your crops?                             | 1 = Yes<br>0 = No<br>98 = Don't know | _ _ _ |
| 924 |                                                                                                                             | Keep improved varieties of livestock?                                          | 1 = Yes<br>0 = No<br>98 = Don't know | _ _ _ |
| 925 |                                                                                                                             | Use animal manure to improve you crops yield?                                  | 1 = Yes<br>0 = No<br>98 = Don't know | _ _ _ |
| 926 |                                                                                                                             | Use any other source of fertilizer on your crops?                              | 1 = Yes<br>0 = No<br>98 = Don't know | _ _ _ |
| 927 |                                                                                                                             | Irrigate your crops?                                                           | 1 = Yes<br>0 = No<br>98 = Don't know | _ _ _ |
| 928 |                                                                                                                             | Rotate your crops from one field to another when planting?                     | 1 = Yes<br>0 = No<br>98 = Don't know | _ _ _ |
| 929 |                                                                                                                             | Harvest water during the rains?                                                | 1 = Yes<br>0 = No<br>98 = Don't know | _ _ _ |
| 930 |                                                                                                                             | Practice intercropping?                                                        | 1 = Yes<br>0 = No<br>98 = Don't know | _ _ _ |
| 931 | Have you ever taken any steps to reduce soil erosion on your farm?                                                          | 1 = Yes<br>0 = No ( <b>Go to 936</b> )<br>98 = Don't know ( <b>Go to 936</b> ) | _ _ _                                |       |
|     |                                                                                                                             | For each mentioned: 1=Yes 0=No                                                 |                                      |       |
| 932 | What steps did you take to reduce soil erosion?                                                                             | Plant trees or shrubs                                                          | _                                    |       |
| 933 |                                                                                                                             | Terracing                                                                      | _                                    |       |

|     |                                                                              |                                          |    |
|-----|------------------------------------------------------------------------------|------------------------------------------|----|
| 934 |                                                                              | Use drainage system                      | __ |
| 935 |                                                                              | Other                                    | __ |
| 936 | Have you received any inputs for your farm from a social/government program? | 1 = Yes<br>0 = No ( <b>Go to 1001</b> )  | __ |
| 937 | What farm inputs have you received?                                          | For each mentioned: 1=Yes 0=No           |    |
| 938 |                                                                              | Seeds                                    | __ |
| 939 |                                                                              | Improved seeds                           | __ |
| 940 |                                                                              | Livestock or poultry                     | __ |
| 941 |                                                                              | Improved varieties of livestock/ poultry | __ |
| 942 |                                                                              | Aquaculture (fish)                       | __ |
| 943 |                                                                              | Fertilizer                               | __ |
| 944 |                                                                              | Other                                    | __ |

## Module 10: WASH

| No   | Question                                                                                                                                         | choices                                                                                                                                                                                                                                                                                                                                                                                                                   |       |
|------|--------------------------------------------------------------------------------------------------------------------------------------------------|---------------------------------------------------------------------------------------------------------------------------------------------------------------------------------------------------------------------------------------------------------------------------------------------------------------------------------------------------------------------------------------------------------------------------|-------|
| 1001 | What is the main source of drinking water for the household?<br><br><b>Do not read list</b>                                                      | 1 = Piped into dwelling<br>2 = Piped to yard/plot<br>3 = Piped to neighbour<br>4 = Public tap/standpipe<br>5 = Tube well or borehole<br>6 = Protected well<br>7 = Unprotected well<br>8 = Protected spring<br>9 = Unprotected spring<br>10 = Rainwater<br>11 = Tanker truck<br>12 = Cart with small tank<br>13 = Surface water (river/dam/Lake/pond/stream/canal/ irrigation channel)<br>14 = Bottled water<br>99 = Other | _ _ _ |
| 1002 | Do you do anything to your household water to make it safer to drink?                                                                            | 1 = Yes<br>0 = No ( <b>Go to 1004</b> )<br>98 = Don't know ( <b>Go to 1004</b> )                                                                                                                                                                                                                                                                                                                                          | _ _ _ |
| 1003 | What is the main thing you do to make the water safer?                                                                                           | 1 = Boil<br>2 = Add bleach/chlorine<br>3 = Strain through a cloth<br>4 = Use water filter (ceramic/Sand/composite/etc)<br>5 = Solar disinfection<br>6 = Let it stand and settle<br>7 = Other(specify)<br>98 = Don't know                                                                                                                                                                                                  | _ _ _ |
| 1004 | What kind of toilet facility do members of your household usually use? If not possible to determine, ask for Permission to observe the facility. | 1 = Flush to piped sewer system<br>2 = Flush to septic tank<br>3 = Flush to pit latrine<br>4 = Flush to somewhere else<br>5 = Flush, don't know where<br>6 = Ventilated improved pit latrine<br>7 = Pit latrine with slab<br>8 = Pit latrine without slab/open pit<br>9 = Composting toilet<br>10 = Bucket toilet<br>11 = Hanging toilet/hanging latrine<br>12 = No facility/bush/field<br>99 = Other (specify)_____      | _ _ _ |
| 1005 | How does your HH primarily dispose of HH waste?                                                                                                  | 1 = Collected by municipality<br>2 = Buried<br>3 = Collected by private establishment<br>4 = Dumped in street/open space                                                                                                                                                                                                                                                                                                  | _ _ _ |



|      |                                                                                                                  |                                                                                                                                                                                                                                                                                                                  |       |
|------|------------------------------------------------------------------------------------------------------------------|------------------------------------------------------------------------------------------------------------------------------------------------------------------------------------------------------------------------------------------------------------------------------------------------------------------|-------|
|      |                                                                                                                  | 5 = Disposed in the compound<br>6 = Dumped in river<br>7 = Burned<br>98 = Other                                                                                                                                                                                                                                  |       |
| 1006 | Do you have separate cooking room?                                                                               | 1 = Yes<br>2 = No ( <b>Go to 1008</b> )                                                                                                                                                                                                                                                                          |       |
| 1007 | Does the stove or cooking room have a chimney?                                                                   | 1 = yes<br>2 = No                                                                                                                                                                                                                                                                                                | _ _ _ |
| 1008 | What type of fuel or energy source is used in this cook stove?                                                   | 1 = Alcohol/ethanol<br>2 = Gasoline/diesel<br>3 = Kerosene/paraffin<br>4 = Coal/lignite<br>5 = Charcoal<br>6 = Wood<br>7 = Straw/shrubs/grass<br>8 = Agricultural crop<br>9 = Animal dung/waste<br>10 = Processed biomass (pellets) or woodchips<br>11 = Garbage/plastic<br>12 = Sawdust<br>96 = Other (specify) | _ _ _ |
| 1009 | Do you have a confined space (beret/gata) to keep livestock?                                                     | 1 = Yes<br>0 = No<br>96 = Not applicable                                                                                                                                                                                                                                                                         | _     |
| 1010 | Do you keep poultry in cages/confined systems (kote)?                                                            | 1 = Yes<br>0 = No<br>96 = Not applicable                                                                                                                                                                                                                                                                         | _     |
| 1011 | What do you think are the activities before which you should wash your hands with soap?<br><b>DO NOT PROMPT.</b> | For each mentioned: <b>1=Yes 0=No</b>                                                                                                                                                                                                                                                                            |       |
| 1012 |                                                                                                                  | Before preparing food                                                                                                                                                                                                                                                                                            | _     |
| 1013 |                                                                                                                  | Before touching or eating food                                                                                                                                                                                                                                                                                   | _     |
| 1014 |                                                                                                                  | Before feeding a child or other person                                                                                                                                                                                                                                                                           | _     |
| 1015 |                                                                                                                  | Praying                                                                                                                                                                                                                                                                                                          | _     |
| 1016 |                                                                                                                  | Don't know                                                                                                                                                                                                                                                                                                       | _     |
| 1017 | What do you think are the activities after which you should wash your hands with soap?<br><b>DO NOT PROMPT.</b>  | For each mentioned: <b>1=Yes 0=No</b>                                                                                                                                                                                                                                                                            |       |
| 1018 |                                                                                                                  | After defecation or urinating                                                                                                                                                                                                                                                                                    | _     |
| 1019 |                                                                                                                  | After handling animals and their waste                                                                                                                                                                                                                                                                           | _     |
| 1020 |                                                                                                                  | After housework or fieldwork                                                                                                                                                                                                                                                                                     | _     |
| 1021 |                                                                                                                  | After touching pets or handling animals and their waste                                                                                                                                                                                                                                                          | _     |
| 1022 |                                                                                                                  | After blowing nose or coughing                                                                                                                                                                                                                                                                                   | _     |
| 1023 |                                                                                                                  | After cleaning a child's bottom                                                                                                                                                                                                                                                                                  | _     |
| 1024 |                                                                                                                  | None                                                                                                                                                                                                                                                                                                             | _     |
| 1025 | What do you think are the reasons to keep poultry and livestock in a confined space?                             | To keep out of house<br> _                                                                                                                                                                                                                                                                                       |       |
| 1026 | For each mentioned: <b>1=Yes 0=No</b>                                                                            | To keep away from water source                                                                                                                                                                                                                                                                                   | _     |
| 1027 |                                                                                                                  | To reduce infectious disease                                                                                                                                                                                                                                                                                     | _     |

|      |                       |                              |   |
|------|-----------------------|------------------------------|---|
| 1028 | <b>DO NOT PROMPT.</b> | To protect livestock/poultry | _ |
| 1029 |                       | Other                        |   |

**Module 11: Food fortification (household coverage of fortifiable foods)**

| SN   | Question                                                                                                                                                             | Response                                                                                                                                                                                                                                                            |         |
|------|----------------------------------------------------------------------------------------------------------------------------------------------------------------------|---------------------------------------------------------------------------------------------------------------------------------------------------------------------------------------------------------------------------------------------------------------------|---------|
| 1101 | Does your household use cooking oil to prepare foods or add to foods at home?                                                                                        | 1 = Yes<br>0 = No →Go to 1103                                                                                                                                                                                                                                       | _       |
| 1102 | The last time your household get cooking oil, where did you get it from?                                                                                             | 1=Purchased from market/shop/kiosk/wholesaler/street vendor<br>2= Homemade or obtained from local farm or local small factory/processor....<br><br>3= Received from food aid/social protection program<br>4 = Other (specify): _____<br><br>98= Don't know/remember | _     _ |
| 1103 | Does your household prepare foods using wheat flour at home, such as bread, kita, injera?                                                                            | 1 = Yes<br>0 = No →Go to 1105                                                                                                                                                                                                                                       | _       |
| 1104 | The last time your household get wheat flour, where did you get it from?                                                                                             | 1=Purchased from market/shop/kiosk/wholesaler/street vendor<br>2= Homemade or obtained from local farm or local small factory/processor....<br><br>3= Received from food aid/social protection program<br>4 = Other (specify): _____<br><br>98= Don't know/remember | _     _ |
| 1105 | I would like to check whether the salt used in your household is iodized. May I have a sample of the salt used to cook meals in your household? Test salt for iodine | 1=Iodine present<br>2= No iodine<br>3= Household uses salt but there is no salt in household<br>4= Household does not use salt<br>5= Salt not tested, specify reason_____                                                                                           | _       |
| 1106 | The last time your household get salt, where did you get it from?                                                                                                    | 1=Purchased from market/shop/kiosk/wholesaler/street vendor<br>2= Homemade or obtained from local farm or local small factory/processor....<br><br>3= Received from food aid/social protection program<br>98= Don't know/remember                                   | _     _ |

|  |  |                             |  |
|--|--|-----------------------------|--|
|  |  | 99 = Other (specify): _____ |  |
|--|--|-----------------------------|--|

## Module 12 – Agriculture practices

| About the household |                                                                                                                                                                                                  |                                                                                                                         |                                       |
|---------------------|--------------------------------------------------------------------------------------------------------------------------------------------------------------------------------------------------|-------------------------------------------------------------------------------------------------------------------------|---------------------------------------|
| 1201                | Does any member of the household own any agricultural land (purchased or own)?                                                                                                                   | 1 = Yes<br>0 = No ( <b>Go to 1212</b> )                                                                                 | _                                     |
| 1202                | How many hectares of agricultural land do members of this household own?<br><br><i>Note: Convert local land measurement unit into hector after discussing with agriculture focal person/AEW.</i> | Enter total number of hectares (If less than 1, Enter in decimals (example 0.5)<br>Enter 9999 if hectares are not known | _ _ _ _                               |
| 1203                | In the past major growing season (Meher) and minor growing (Belg) season, not including the current season, did you work on the family farm?                                                     | 1 = Yes<br>0 = No ( <b>Go to 1211</b> )                                                                                 | _                                     |
|                     | What sort of work did you do on the family farm?<br><br>1204 READ THE LIST<br>1205<br>1206<br>1207<br>1208<br>1209<br>1210                                                                       | 1 = Yes 0 = No                                                                                                          |                                       |
|                     |                                                                                                                                                                                                  | 1 = Home (kitchen) gardening                                                                                            | _                                     |
|                     |                                                                                                                                                                                                  | 2 = Fieldwork                                                                                                           | _                                     |
|                     |                                                                                                                                                                                                  | 3 = Cash crop farming                                                                                                   | _                                     |
|                     |                                                                                                                                                                                                  | 4 = Producing dairy                                                                                                     | _                                     |
|                     |                                                                                                                                                                                                  | 5 = Rearing poultry                                                                                                     | _                                     |
|                     |                                                                                                                                                                                                  | 6 = Raising livestock                                                                                                   | _                                     |
|                     |                                                                                                                                                                                                  | 7 = Fishpond/ aquaculture                                                                                               | _                                     |
|                     |                                                                                                                                                                                                  | 99 = Other .....                                                                                                        | _                                     |
| 1211                |                                                                                                                                                                                                  | Does this household own any livestock, herds, other farm animals, or poultry?                                           | 1 = Yes<br>0 = No → <b>Go to 1221</b> |
|                     | How many of the following animals do this household own?                                                                                                                                         | For each: Enter number. <b>If none, enter 0</b>                                                                         |                                       |
| 1212                |                                                                                                                                                                                                  | Chickens                                                                                                                | _ _ _                                 |
| 1213                |                                                                                                                                                                                                  | Goats                                                                                                                   | _ _ _                                 |
| 1214                |                                                                                                                                                                                                  | Sheep                                                                                                                   | _ _ _                                 |
| 1215                |                                                                                                                                                                                                  | Donkeys                                                                                                                 | _ _ _                                 |
| 1216                |                                                                                                                                                                                                  | Horses                                                                                                                  | _ _ _                                 |
| 1217                |                                                                                                                                                                                                  | Mules                                                                                                                   | _ _ _                                 |
| 1218                |                                                                                                                                                                                                  | Camels                                                                                                                  | _ _ _                                 |
| 1219                |                                                                                                                                                                                                  | Milk cows                                                                                                               | _ _ _                                 |
| 1220                |                                                                                                                                                                                                  | Oxen                                                                                                                    | _ _ _                                 |

In the past 2 growing seasons (Meher and Belg), not including the current season, please describe all the crops (cereals, legumes, vegetables, fruits, seeds, and other crops) grown on your household farm.

Please also describe all animal source foods (meat, eggs, milk, dairy, fish, other) that you have produced on your household farm in same period.

Write down all crops and animals mentioned by the respondent. When the respondent has finished, probe for crops and animal source foods not mentioned. Then ask about production/yields in the relevant units. Ask the respondent to estimate the amount of the total production that went to sales, food consumption, and storage/losses/other uses.

|      | Group            | Crop                | Did HH cultivate crop?<br>1 = yes<br>0 = No | Season<br>1=Meher<br>2=Belg<br>3=Both | Amount | During the previous Major seasons (Meher) and Minor season (Belg) not including the current season |          |                                            |
|------|------------------|---------------------|---------------------------------------------|---------------------------------------|--------|----------------------------------------------------------------------------------------------------|----------|--------------------------------------------|
|      |                  |                     |                                             |                                       |        | Sold                                                                                               | Consumed | Storage, losses, animal feed or other uses |
| 1221 | Staples          | Maize               | _                                           |                                       | _      | _     _                                                                                            | _     _  | _     _                                    |
| 1222 |                  | Teff                | _                                           |                                       | _      | _     _                                                                                            | _     _  | _     _                                    |
| 1223 |                  | Wheat               | _                                           |                                       | _      | _     _                                                                                            | _     _  | _     _                                    |
| 1224 |                  | Barley              | _                                           |                                       | _      | _     _                                                                                            | _     _  | _     _                                    |
| 1225 |                  | Sorghum             | _                                           |                                       | _      | _     _                                                                                            | _     _  | _     _                                    |
| 1226 |                  | Millet              | _                                           |                                       | _      | _     _                                                                                            | _     _  | _     _                                    |
| 1227 |                  | Rice                | _                                           |                                       | _      | _     _                                                                                            | _     _  | _     _                                    |
| 1228 |                  | Emmer wheat (oaths) | _                                           |                                       | _      | _     _                                                                                            | _     _  | _     _                                    |
| 1229 |                  | Other cereals       | _                                           |                                       | _      | _     _                                                                                            | _     _  | _     _                                    |
| 1230 | Pulses (legumes) | Bean                | _                                           |                                       | _      | _     _                                                                                            | _     _  | _     _                                    |
| 1231 |                  | Haricot bean        | _                                           |                                       | _      | _     _                                                                                            | _     _  | _     _                                    |
| 1232 |                  | Lentil (Miser)      | _                                           |                                       | _      | _     _                                                                                            | _     _  | _     _                                    |
| 1233 |                  | Grass pea (guaya)   | _                                           |                                       | _      | _     _                                                                                            | _     _  | _     _                                    |
| 1234 |                  | Chickpea            | _                                           |                                       | _      | _     _                                                                                            | _     _  | _     _                                    |
| 1235 |                  | Field pea (Ater)    | _                                           |                                       | _      | _     _                                                                                            | _     _  | _     _                                    |
| 1236 |                  | Soya bean           | _                                           |                                       | _      | _     _                                                                                            | _     _  | _     _                                    |

|      |                                    |                                      |         |   |     |     |     |     |
|------|------------------------------------|--------------------------------------|---------|---|-----|-----|-----|-----|
| 1237 |                                    | Other legumes                        | _       |   | _   | _ _ | _ _ | _ _ |
| 1238 | Oil Crops                          | Niger seed (Nug)                     | _       |   | _   | _ _ | _ _ | _ _ |
| 1239 |                                    | Sunflower                            | _       |   | _   | _ _ | _ _ | _ _ |
| 1240 |                                    | Sesame                               | _       |   | _   | _ _ | _ _ | _ _ |
| 1241 |                                    | Linseed                              | _       |   | _   | _ _ | _ _ | _ _ |
| 1242 |                                    | Rapeseed (Gomenzer)                  | _       |   | _   | _ _ | _ _ | _ _ |
| 1243 |                                    | Lupine (Gibto)                       | _       |   | _   | _ _ | _ _ | _ _ |
| 1244 |                                    | Nuts                                 |         |   |     | _ _ | _ _ | _ _ |
| 1245 |                                    | Other oil crops                      | _       |   | _   | _ _ | _ _ | _ _ |
| 1246 |                                    | Root crops/<br>tubers/<br>vegetables | Cassava | _ |     | _   | _ _ | _ _ |
| 1247 | Enset                              |                                      | _       |   | _   | _ _ | _ _ | _ _ |
| 1248 | Irish potato                       |                                      | _       |   | _   | _ _ | _ _ | _ _ |
| 1249 | Sweet potato                       |                                      | _       |   | _   | _ _ | _ _ | _ _ |
| 1250 | Sweet potato - orange flesh        |                                      | _       |   | _   | _ _ | _ _ | _ _ |
| 1251 | Onion                              |                                      | _       |   | _   | _ _ | _ _ | _ _ |
| 1252 | Pepper                             |                                      | _       |   | _   | _ _ | _ _ | _ _ |
| 1253 | Tomato                             |                                      | _       |   | _   | _ _ | _ _ | _ _ |
| 1254 | Cabbage                            |                                      | _       |   | _   | _ _ | _ _ | _ _ |
| 1255 | Other light green leafy vegetables |                                      | _       |   | _   | _ _ | _ _ | _ _ |
| 1256 | Kale                               |                                      | _       |   | _   | _ _ | _ _ | _ _ |
| 1257 | Other dark green leafy vegetables  |                                      | _       |   | _   | _ _ | _ _ | _ _ |
| 1258 | Carrot                             |                                      | _       |   | _   | _ _ | _ _ | _ _ |
| 1259 | Other roots or tubers              |                                      | _       |   | _   | _ _ | _ _ | _ _ |
| 1260 | Other vegetables                   | _                                    |         | _ | _ _ | _ _ | _ _ |     |
| 1261 | Perennial crops/<br>fruits         | Coffee                               | _       |   | _   | _ _ | _ _ | _ _ |
| 1262 |                                    | Chat (khat)                          | _       |   | _   | _ _ | _ _ | _ _ |
| 1263 |                                    | Banana                               | _       |   | _   | _ _ | _ _ | _ _ |
| 1264 |                                    | Orange                               | _       |   | _   | _ _ | _ _ | _ _ |
| 1265 |                                    | Mango                                | _       |   | _   | _ _ | _ _ | _ _ |
| 1266 |                                    | Hop                                  | _       |   | _   | _ _ | _ _ | _ _ |

|      | (Gesho)                     |   |  |   |      |      |      |
|------|-----------------------------|---|--|---|------|------|------|
| 1267 | Avocado                     | _ |  | _ | _  _ | _  _ | _  _ |
| 1268 | Lemon                       | _ |  | _ | _  _ | _  _ | _  _ |
| 1269 | Papaya                      | _ |  | _ | _  _ | _  _ | _  _ |
| 1270 | Guava                       | _ |  | _ | _  _ | _  _ | _  _ |
| 1271 | Water<br>Melon              | _ |  | _ | _  _ | _  _ | _  _ |
| 1272 | Tirngo fruit                | _ |  | _ | _  _ | _  _ | _  _ |
| 1273 | Other<br>perennial<br>crops | _ |  | _ | _  _ | _  _ | _  _ |
| 1274 | Other fruits                | _ |  | _ | _  _ | _  _ | _  _ |



|      | Group | Animal source food (unit)      | Does HH produce?<br><b>1=yes</b><br><b>0=no</b><br><i>(If no, skip to the next item)</i> | Amount | During the previous Major seasons (Meher) and Minor season (Belg) not including the current season |           |          |                                        |
|------|-------|--------------------------------|------------------------------------------------------------------------------------------|--------|----------------------------------------------------------------------------------------------------|-----------|----------|----------------------------------------|
|      |       |                                |                                                                                          |        | Season<br>1=Meher<br>2=Belg<br>3=Both                                                              | How much? |          |                                        |
|      |       |                                |                                                                                          |        |                                                                                                    | Sold      | Consumed | Storage, losses, animal feed or others |
| 1275 | All   | Chicken eggs                   |                                                                                          | _      | _                                                                                                  | _ _       | _ _      | _ _                                    |
| 1276 |       | Chicken meat                   |                                                                                          | _      | _                                                                                                  | _ _       | _ _      | _ _                                    |
| 1277 |       | Goat milk                      |                                                                                          | _      | _                                                                                                  | _ _       | _ _      | _ _                                    |
| 1278 |       | Goat meat                      |                                                                                          | _      | _                                                                                                  | _ _       | _ _      | _ _                                    |
| 1279 |       | Camel milk                     |                                                                                          | _      | _                                                                                                  | _ _       | _ _      | / _ _                                  |
| 1280 |       | Sheep meat                     |                                                                                          | _      | _                                                                                                  | _ _       | _ _      | / _ _                                  |
| 1281 |       | Cow milk                       |                                                                                          | _      | _                                                                                                  | _ _       | _ _      | / _ _                                  |
| 1282 |       | Cow other dairy                |                                                                                          | _      | _                                                                                                  | _ _       | _ _      | / _ _                                  |
| 1283 |       | Beef                           |                                                                                          | _      | _                                                                                                  | _ _       | _ _      | / _ _                                  |
| 1284 |       | Other meat (e.g. camel, horse) |                                                                                          | _      | _                                                                                                  | _ _       | _ _      | / _ _                                  |
| 1285 |       | Farmed fish                    |                                                                                          | _      | _                                                                                                  | _ _       | _ _      | / _ _                                  |

**Module 13: Household food insecurity**

| Now I would like to ask you some questions about food. During the last 12 MONTHS, was there a time when: |                                                                                                                                                                                              |                                               |       |
|----------------------------------------------------------------------------------------------------------|----------------------------------------------------------------------------------------------------------------------------------------------------------------------------------------------|-----------------------------------------------|-------|
| SN                                                                                                       | Questions                                                                                                                                                                                    | Answers                                       |       |
| 1301                                                                                                     | You or others in your household worried about not having enough food to eat because of a lack of money or other resources?                                                                   | 1=Yes<br>0= No<br>98=Don't know<br>97=Refused | _ _ _ |
| 1302                                                                                                     | Still thinking about the last 12 MONTHS, was there a time when you or others in your household were unable to eat healthy and nutritious food because of a lack of money or other resources? | 1=Yes<br>0= No<br>98=Don't know<br>97=Refused | _ _ _ |
| 1303                                                                                                     | Was there a time when you or others in your household ate only a few kinds of foods because of a lack of money or other resources?                                                           | 1=Yes<br>0= No<br>98=Don't know<br>97=Refused | _ _ _ |
| 1304                                                                                                     | Was there a time when you or others in your household had to skip a meal because there was not enough money or other resources to get food?                                                  | 1=Yes<br>0= No<br>98=Don't know<br>97=Refused | _ _ _ |
| 1305                                                                                                     | Still thinking about the last 12 MONTHS, was there a time when you or others in your household ate less than you thought you should because of a lack of money or other resources?           | 1=Yes<br>0= No<br>98=Don't know<br>97=Refused | _ _ _ |
| 1306                                                                                                     | Was there a time when your household ran out of food because of a lack of money or other resources?                                                                                          | 1=Yes<br>0= No<br>98=Don't know<br>97=Refused | _ _ _ |
| 1307                                                                                                     | Was there a time when you or others in your household were hungry but did not eat because there was not enough money or other resources for food?                                            | 1=Yes<br>0= No<br>98=Don't know<br>97=Refused | _ _ _ |
| 1308                                                                                                     | Was there a time when you or others in your household went without eating for a whole day because of a lack of money or other resources?                                                     | 1=Yes<br>0= No<br>98=Don't know<br>97=Refused | _ _ _ |

## Module 14: Employment and social protection

| S.N. | Questions                                                                                                                                                                                                                                    | Response                                                                                                                                                                                                                                                                                |       |
|------|----------------------------------------------------------------------------------------------------------------------------------------------------------------------------------------------------------------------------------------------|-----------------------------------------------------------------------------------------------------------------------------------------------------------------------------------------------------------------------------------------------------------------------------------------|-------|
| 1401 | Since last year, what has been the main livelihood or income source of the HH?<br><br><b>(DO NOT READ LIST. PROBE FOR ONE RESPONSE)</b>                                                                                                      | 1 = Sale of self-produced<br>2 = horticulture crops Sale of self-produced field crops<br>3 = Own business (including commerce, livestock rearing)<br>4 = Wage employment<br>5 = Remittances<br>6 = Property income<br>7 = Government transfers/NGO support<br>8 = Pension<br>99 = Other | _ _ _ |
| 1402 | Since last year, have there been other livelihood or income sources for the HH?<br><br><b>(DO NOT READ LIST. PROBE FOR ALL RESPONSES)</b>                                                                                                    | 1 = Sale of self-produced<br>2 = horticulture crops Sale of self-produced field crops<br>3 = Own business (including commerce, livestock rearing)<br>4 = Wage employment<br>5 = Remittances<br>6 = Property income<br>7 = Government transfers/NGO support<br>8 = Pension<br>99 = Other | _ _ _ |
| 1403 | Since last year, did anyone in your HH receive any kind of food or cash assistance from the government, NGO, or other agencies? <i>Clarify: This is not formal employment or pension. However, it may or may not be conditional on work.</i> | 1 = Yes<br>0 = No<br>98 = Don't know                                                                                                                                                                                                                                                    | _ _ _ |
| 1404 | Since last year, which members of this HH were targeted to receive this support?                                                                                                                                                             | 1 = All HH members<br>2 = Specific HH members<br>98 = Don't know                                                                                                                                                                                                                        | _ _ _ |
| 1405 | Which specific HH members received food or cash assistance?<br><i>Clarify: This includes children whose parents receive cash on their behalf.</i>                                                                                            | Link this back to the HH roster and have interviewer select names.<br>98 = Don't know                                                                                                                                                                                                   | _ _ _ |
| 1406 | Which of these categories apply to the persons who received food or cash assistance?<br><br><b>(READ RESPONSES ALOUD. SELECT ALL THAT APPLY)</b>                                                                                             | 1 = Pregnant women<br>2 = Lactating women<br>3 = Children under 5 years<br>4 = Elderly<br>5 = Disabled person<br>6 = None of the above                                                                                                                                                  | _ _ _ |
| 1407 | Since last year, which food or social assistance program did members of the HH receive support from? <b>(DO NOT READ LIST ALOUD. PROBE FOR ALL RESPONSES)</b>                                                                                | 1 = PSNP<br>2 = Community Care Coalition<br>3 = Other assistance program<br>98 = Don't know                                                                                                                                                                                             | _ _ _ |
| 1408 | Since last year, what was the form of assistance that members of your HH received from these programs: food, cash or both food and cash?                                                                                                     | 1 = Cash only transfer<br>2 = Food only transfer<br>3 = Cash and food mix<br>99 = Other<br>98 = Don't know                                                                                                                                                                              | _ _ _ |

|      |                                                                                                           |                                                                                         |       |
|------|-----------------------------------------------------------------------------------------------------------|-----------------------------------------------------------------------------------------|-------|
| 1409 | Is this HH currently receiving food or cash?                                                              | 1 = Yes<br>0 = No<br>98 = Don't know                                                    | _ _ _ |
| 1410 | Since last year, how has your HH used the food received?<br>(READ RESPONSES ALOUD. SELECT ALL THAT APPLY) | 1 = HH consumption<br>2 = Sold food for cash<br>3 = Other activities<br>98 = Don't know |       |

|       |                                                                                                                                                                                 |                                                                                                                 |
|-------|---------------------------------------------------------------------------------------------------------------------------------------------------------------------------------|-----------------------------------------------------------------------------------------------------------------|
| 1501. | How do you preserve soil fertility?<br><br><i>[Multiple answer is allowed! Do not read the choices. Listen and mark the one they mention]</i>                                   | 1 = Fertilization (Chemicals, animal manure, green manure etc)                                                  |
|       |                                                                                                                                                                                 | 2 = Crop rotation (Cultivation of a series of dissimilar types of crops in the same area in sequential seasons) |
|       |                                                                                                                                                                                 | 3=Intercropping (Cultivation of two or more dissimilar types of crops in the same area in the same season)      |
|       |                                                                                                                                                                                 | 4=Tillage                                                                                                       |
|       |                                                                                                                                                                                 | 99=Other (specify): .....                                                                                       |
| 1502. | Do you apply fertilizers?                                                                                                                                                       | 1= Yes                                                                                                          |
|       |                                                                                                                                                                                 | 0= No (Go to 1506)                                                                                              |
| 1503. | Which kinds of fertilizers do you use more often?                                                                                                                               | 1= Chemical fertilizers                                                                                         |
|       |                                                                                                                                                                                 | 2 = Organic fertilizers (non-chemicals like animal manure, green manure, compost, etc.) (Go to →1505)           |
| 1504. | Which chemical fertilizers are used most often, can you specify the type/name?                                                                                                  | 1 = UREA                                                                                                        |
|       |                                                                                                                                                                                 | 2 = DAP                                                                                                         |
|       |                                                                                                                                                                                 | 3= NPS                                                                                                          |
|       |                                                                                                                                                                                 | 98= Don't know                                                                                                  |
|       |                                                                                                                                                                                 | 99= Other (specify): .....                                                                                      |
| 1505. | Which organic fertilizers are used more often, can you specify the type?                                                                                                        | 1 = Livestock manure                                                                                            |
|       |                                                                                                                                                                                 | 2 = Poultry manure                                                                                              |
|       |                                                                                                                                                                                 | 99=Other (specify) .....                                                                                        |
| 1506. | What is the most dominant cereals/crop you produce on your farm?<br><br><i>[Only one answer is allowed! Do not read the choices. Listen, mark/specify the one they mention]</i> | 1 = Wheat                                                                                                       |
|       |                                                                                                                                                                                 | 2 = Teff                                                                                                        |
|       |                                                                                                                                                                                 | 3 = Maize                                                                                                       |
|       |                                                                                                                                                                                 | 99= Other (Specify): .....                                                                                      |
| 1507. | How far is your agricultural land from your house?<br><br><i>[In case they own many farms, Consider only the one with the dominant crop]</i>                                    | 1= within 500 meter radius                                                                                      |
|       |                                                                                                                                                                                 | 2= 500 -1000 meter radius                                                                                       |
|       |                                                                                                                                                                                 | 3= 1000 - 3000 meter radius                                                                                     |
|       |                                                                                                                                                                                 | 4= More than 3000 meter                                                                                         |

**Module 15: Soil information questionnaire**

**Observational checklist for soil sampling**

|     |                                                                                         |
|-----|-----------------------------------------------------------------------------------------|
| 1   | Region                                                                                  |
| 2   | Zone                                                                                    |
| 3   | Woreda                                                                                  |
| 4   | Kebele                                                                                  |
| 5   | Gote Code                                                                               |
| 6   | Household Code                                                                          |
|     | Sample code .....                                                                       |
| 7   | <b>Crop history</b>                                                                     |
| 7.1 | Last two-year crop (Please, specify the crop harvested in 2011, growing season) .....   |
| 7.2 | Last crop (Please, specify the crop harvested from the previous growing season) .....   |
| 7.3 | Crop to be planted for the current season.....                                          |
| 7.4 | Please write the intended planting dates (Year and Month) .....,                        |
| 7.5 | When was the <b>last time</b> the agricultural field gets tilled?                       |
|     | 1 = 0 to 3 months ago                                                                   |
|     | 2 = 3 to 6 months ago                                                                   |
|     | 1 = 6 to 12 months ago                                                                  |
|     | 2 = before a year                                                                       |
| 8   | <b>Fertilizer utilization</b>                                                           |
| 8.1 | Which fertilizer is applied                                                             |
|     | 1 = Chemical fertilizer                                                                 |
|     | 2 = Organic fertilizer ( <b>Go to 8.4</b> )                                             |
|     | 3 = Both 1&2                                                                            |
|     | 4 = Fertilizer not applied ( <b>Go to 9</b> )                                           |
| 8.2 | Which Chemical fertilizer is applied                                                    |
|     | 1 = UREA                                                                                |
|     | 2 = DAP                                                                                 |
|     | 3 = NPS                                                                                 |
|     | 4 = Other, please specify.....                                                          |
| 8.3 | Please write the last date (Year and Month) you applied chemical fertilizer?.....       |
| 8.4 | Which Organic fertilizer is applied                                                     |
|     | 1 = Animal Manure                                                                       |
|     | 2 = Green Manure                                                                        |
|     | 3 = Compost                                                                             |
|     | 4 = Other, please specify.....                                                          |
| 8.5 | Please write the <b>last date</b> (Year and Month) you applied organic fertilizer?..... |
| 9   | <b>Soil characteristics</b>                                                             |

|     |                                                                                                                  |
|-----|------------------------------------------------------------------------------------------------------------------|
| 9.1 | Observation: What is the colour of the soil you are about to sample                                              |
|     | 1 = Dark brown/Black                                                                                             |
|     | 2 = Red                                                                                                          |
|     | 3 = Grey                                                                                                         |
|     | 4 = Other, please specify.....                                                                                   |
| 9.1 | Observation: Field area landscape                                                                                |
|     | 1 = plains/level grounds                                                                                         |
|     | 2 = Sloppy/Inclined                                                                                              |
| 9.4 | Observation: Is there a standing crop on the sampling field or to the nearby farmland.                           |
|     | 1 = Yes                                                                                                          |
|     | 2 = No                                                                                                           |
| 9.3 | Observation: Is sampling field tilled/ is it being tilled at the time of sampling.                               |
|     | 1 = Yes                                                                                                          |
|     | 2 = No                                                                                                           |
| 10  | Distance of the farmland to the nearby houses                                                                    |
|     | 1 = below 100meter                                                                                               |
|     | 2 = 100 to 500meter                                                                                              |
|     | 3 = 500 to 1000meter                                                                                             |
|     | 4 = More than 1000meter                                                                                          |
| 11  | Please take picture for the surrounding environment i.e., plot, houses, anything permanent or even moving cattle |
| 12  | Please capture GPS for the sampled farmland                                                                      |
| 13  | Name of sample collector.....                                                                                    |
|     | LIST ANY ABNORMAL CONDITIONS OR SPECIFIC INFORMATION DESIRED:                                                    |



**Module 16: A Dietary assessment questionnaire**

**Note for the data collectors:** Among the household members, this module questionnaire is to be filled for the child under-five years of age and women of the reproductive age in the household.

**Part 1: Before 24-hr recall**

| 24-hour dietary recall                                                                     |                                                                          |                                                  |        |
|--------------------------------------------------------------------------------------------|--------------------------------------------------------------------------|--------------------------------------------------|--------|
| EA code  _ _ _  Household code  _ _  Line Number  _ _  Child ID  _ _                       |                                                                          |                                                  |        |
| Unique ID Woman:  _ _ _ _ _ _ _  Unique ID Child:  _ _ _ _ _ _ _ _ _ _                     |                                                                          |                                                  |        |
| Interview Date: Date - _/ _/ _- - - Day - 01=Mon 02=Tue 03=Wed 04=Thu 05=Fri 06=Sat 07=Sun |                                                                          |                                                  |        |
| Date of food intake - _/ _/ _- - -                                                         |                                                                          |                                                  |        |
|                                                                                            | Question                                                                 | Coding category                                  | skip   |
| 1.                                                                                         | Enumerator Code:                                                         | _____                                            |        |
| 2.                                                                                         | For which target group is the recall being done?                         | 0. Woman 1. Child                                |        |
| 3.                                                                                         | Recall number                                                            | 0. Recall 1<br>1. Recall 2                       |        |
| 4.                                                                                         | Name of the woman interviewed                                            | _____                                            |        |
| 5.                                                                                         | Age of the woman (in complete years)                                     | Age in years (_____)                             |        |
| 6.                                                                                         | Name of child                                                            | _____                                            |        |
| 7.                                                                                         | Date of birth (DOB): Use Ethiopian calendar                              | _ _ _ / _ _ _ /20 _ _ _                          |        |
| 8.                                                                                         | Age of the child (in complete month)                                     | _____ months                                     |        |
| 9.                                                                                         | Child's sex:                                                             | 0=Male 1= Female                                 |        |
| 10.                                                                                        | Food weighing scale number:                                              | _ _ _                                            |        |
| 11.                                                                                        | Was yesterday's food intake different from your usual diet?              | 1=Yes 0=No                                       | No →13 |
| 12.                                                                                        | If yes,                                                                  | 1=Holyday/celebration<br>2=I was sick<br>3=Other |        |
| 13.                                                                                        | Was [child name] yesterday's food intake different from your usual diet? | 1=Yes<br>0=No                                    | No →15 |

|     |                                                      |                                                  |  |
|-----|------------------------------------------------------|--------------------------------------------------|--|
| 14. | If yes,                                              | 1=Holyday/celebration<br>2=I was sick<br>3=Other |  |
| 15. | Did you take medicine/supplement yesterday?          | 1=Yes<br>0=No<br><i>If yes, name:</i> _____      |  |
| 16. | Did [child name] take medicine/supplement yesterday? | 1=Yes<br>0=No<br><i>If yes, name:</i> _____      |  |

## Procedures to collect the required information

### 1. Pass 1: list all foods and drinks consumed during the 24-hour period.

Now I would like to ask you about the foods and drinks that [YOU/ YOUR CHILD] consumed yesterday from the time you work up until you went to sleep, sunrise yesterday to sunrise today. Please list all foods or drinks you ate, weather you ate or drank them at home or somewhere else. Please think about snacks and small meals as well as main meals.

- 1) "WHAT WAS THE FIRST THING [you/ your child] ATE YESTERDAY AFTER SUNRISE?"
- 2) "WHEN WAS THAT"
- 3) "DID [you/your child] HAVE ANYTHING WITH THAT?"
- 4) "WHAT DID [you/he/she] HAVE?"
- 5) "WHAT IS THE NEXT THING [you/ your child] ATE OR DRANK AND WHEN WAS THAT?"
- 6) REPEAT questions 3-5 until you have a full record for both DAY AND NIGHT
  - a. The reference period is from sunrise yesterday to sunrise this morning. If they wake up at a different time than sunrise, you can use the time from waking up yesterday until waking up today

### 2. Pass 2: get more detail about each food.

- 7) "NOW, PLEASE DESCRIBE EACH FOOD [you/ your child] ATE YESTERDAY"
- 8) "WHAT TYPE WAS IT?"
- 9) "WHERE DID YOU GET IT?"
- 10) "WHAT ARE THE INGREDIENTS?"
  - a. Use standard "probes" (probing questions) to get these details for each food.
- 11) "HOW MUCH DID THIS RECIPE MAKE?" or "WHAT WAS THE TOTAL AMOUNT THIS MADE?"
- 12) "HOW WAS The Recipe PREPARED?"
  - a. Identify the cooking methods used (particularly if raw, fermented, or fried in oil).

### 3. Pass 3: estimate the amount consumed of each food on the list

- 13) "HOW MUCH OF [name the first food] DID [you/ your child] CONSUME?"
  - a. Help the mother remember and **estimate the amount** of each food or recipe that her child ate and that she herself ate.
- 14) "WAS ANY LEFT OVER?"
  - a. If any food is leftover from what the mother served to the child, enter that amount.
- 15) "PLEASE HELP ME ESTIMATE THE AMOUNT OF FOOD YOU ARE OR USED IN THE RECIPE"

Use following portion size estimation method to estimate the amount of food/ingredient eaten or used in a recipe 1. Direct weight (g) 2.Proxy weight (g) 3. Water (g) 4. Number 5. Other (specify).

### 4. Pass 4: verify everything consumed

- a. Quickly read the information back to the respondent, "HAVE I FORGOTTEN TO ADD ANYTHING?"

**Part 2. Quick list****Pass 1**

**Please describe the foods and drinks that [YOU/ YOUR CHILD] consumed yesterday from the time you work up until you went to sleep (sunrise yesterday to sunrise today). Please list all foods or drinks you ate, whether you ate or drank them at home or somewhere else. Please think about snacks and small meals as well as main meals.**

*Write down all foods and drinks mentioned. When composite dishes are mentioned, ask for the list of ingredients*

*When the respondent has finished, probe for meals and snacks not mentioned.*

| Early morning | Mid-morning | Noon | Afternoon | Evening | Late evening |
|---------------|-------------|------|-----------|---------|--------------|
|               |             |      |           |         |              |



| Food No. | What was the first thing [YOU/ YOUR CHILD] ate or drank after sunrise yesterday? Any else? | Time of meal | Please describe this food / beverage/ ingredient: | How was this prepared ? | Place of preparation | How was the food / Ing. measured | Amount served | Amount left over | Amount eaten | Recipe information       |                               |                                 |                       |
|----------|--------------------------------------------------------------------------------------------|--------------|---------------------------------------------------|-------------------------|----------------------|----------------------------------|---------------|------------------|--------------|--------------------------|-------------------------------|---------------------------------|-----------------------|
|          |                                                                                            |              |                                                   |                         |                      |                                  |               |                  |              | State of each ingredient | Cooking method of preparation | Total amount of recipe prepared | Links to food/ recipe |
| 1        |                                                                                            |              |                                                   |                         |                      |                                  |               |                  |              |                          |                               |                                 |                       |
|          | Ingredient:                                                                                |              | Description                                       |                         |                      |                                  |               |                  |              |                          |                               |                                 |                       |
|          |                                                                                            |              |                                                   |                         | NA                   |                                  |               |                  |              |                          |                               |                                 |                       |
|          |                                                                                            |              |                                                   |                         | NA                   |                                  |               |                  |              |                          |                               |                                 |                       |
|          |                                                                                            |              |                                                   |                         | NA                   |                                  |               |                  |              |                          |                               |                                 |                       |
|          |                                                                                            |              |                                                   |                         | NA                   |                                  |               |                  |              |                          |                               |                                 |                       |
| 2        |                                                                                            |              |                                                   |                         |                      |                                  |               |                  |              |                          |                               |                                 |                       |
|          |                                                                                            |              |                                                   |                         | NA                   |                                  |               |                  |              |                          |                               |                                 |                       |
|          |                                                                                            |              |                                                   |                         | NA                   |                                  |               |                  |              |                          |                               |                                 |                       |
|          |                                                                                            |              |                                                   |                         | NA                   |                                  |               |                  |              |                          |                               |                                 |                       |
|          |                                                                                            |              |                                                   |                         | NA                   |                                  |               |                  |              |                          |                               |                                 |                       |
| 3        |                                                                                            |              |                                                   |                         |                      |                                  |               |                  |              |                          |                               |                                 |                       |
|          |                                                                                            |              |                                                   |                         | NA                   |                                  |               |                  |              |                          |                               |                                 |                       |
|          |                                                                                            |              |                                                   |                         | NA                   |                                  |               |                  |              |                          |                               |                                 |                       |
|          |                                                                                            |              |                                                   |                         | NA                   |                                  |               |                  |              |                          |                               |                                 |                       |
|          |                                                                                            |              |                                                   |                         | NA                   |                                  |               |                  |              |                          |                               |                                 |                       |

**Time of meal:** 1. Early morning 2. Mid-Morning 3. Noon 4. Afternoon 5. Evening 6. Late evening

**Place of preparation:** 1. Home 2. Outside home

**How was it prepared:** 1=raw/ no change/ as purchased; 2=fermented; 3=fried; 04=cooked or boiled – wet heat; 5=baked/ grilled/ broiled – dry heat; 6=local miller; 7=blanched (dipped in boiling water); 8=other

| Food No. | What was the first thing [YOU/ YOUR CHILD] ate or drank after sunrise yesterday? Any else? | Time of meal | Please describe this food / beverage/ ingredient: | How was this prepared ? | Place of preparation | How was the food / Ing. measured | Amount served | Amount left over | Amount eaten | Recipe information       |                              |                                 |                       |
|----------|--------------------------------------------------------------------------------------------|--------------|---------------------------------------------------|-------------------------|----------------------|----------------------------------|---------------|------------------|--------------|--------------------------|------------------------------|---------------------------------|-----------------------|
|          |                                                                                            |              |                                                   |                         |                      |                                  |               |                  |              | State of each ingredient | Cooking method of the recipe | Total amount of recipe prepared | Links to food/ recipe |
| 1        |                                                                                            |              |                                                   |                         |                      |                                  |               |                  |              |                          |                              |                                 |                       |
|          | Ingredient:                                                                                |              | Description                                       |                         |                      |                                  |               |                  |              |                          |                              |                                 |                       |
|          |                                                                                            |              |                                                   |                         | NA                   |                                  |               |                  |              |                          |                              |                                 |                       |
|          |                                                                                            |              |                                                   |                         | NA                   |                                  |               |                  |              |                          |                              |                                 |                       |
|          |                                                                                            |              |                                                   |                         | NA                   |                                  |               |                  |              |                          |                              |                                 |                       |
|          |                                                                                            |              |                                                   |                         | NA                   |                                  |               |                  |              |                          |                              |                                 |                       |
| 2        |                                                                                            |              |                                                   |                         |                      |                                  |               |                  |              |                          |                              |                                 |                       |
|          |                                                                                            |              |                                                   |                         | NA                   |                                  |               |                  |              |                          |                              |                                 |                       |
|          |                                                                                            |              |                                                   |                         | NA                   |                                  |               |                  |              |                          |                              |                                 |                       |
|          |                                                                                            |              |                                                   |                         | NA                   |                                  |               |                  |              |                          |                              |                                 |                       |
|          |                                                                                            |              |                                                   |                         | NA                   |                                  |               |                  |              |                          |                              |                                 |                       |
| 3        |                                                                                            |              |                                                   |                         |                      |                                  |               |                  |              |                          |                              |                                 |                       |
|          |                                                                                            |              |                                                   |                         | NA                   |                                  |               |                  |              |                          |                              |                                 |                       |
|          |                                                                                            |              |                                                   |                         | NA                   |                                  |               |                  |              |                          |                              |                                 |                       |
|          |                                                                                            |              |                                                   |                         | NA                   |                                  |               |                  |              |                          |                              |                                 |                       |
|          |                                                                                            |              |                                                   |                         | NA                   |                                  |               |                  |              |                          |                              |                                 |                       |

|  | What was the first | Time of | Please describe this food / | How was | Place of | 1 | 2 | 3 | 4 | 5 | 6 | 7 | 8 | Recipe information |
|--|--------------------|---------|-----------------------------|---------|----------|---|---|---|---|---|---|---|---|--------------------|
|  |                    |         |                             |         | NA       |   |   |   |   |   |   |   |   |                    |

**Time of meal:** 1. Early morning 2. Mid-Morning 3. Noon 4. Afternoon 5. Evening 6. Late evening

**Place of preparation:** 1. Home 2. Outside home

**How was it prepared:** 1=raw/ no change/ as purchased; 2=fermented; 3=fried; 04=cooked or boiled – wet heat; 5=baked/ grilled/ broiled – dry heat; 6=local miller; 7=blanched (dipped in boiling water); 8=other



## Module 17: Biomarkers collection tools

**PRESCHOOL AGE CHILDREN (6-59 MONTHS)**  
**ETHIOPIAN FOOD AND NUTRITION STRATEGY BASELINE SURVEY 2020/21**  
**Biochemical and Health Related Data Collection Tool**

| IDENTIFICATION                                                                                                                                                                       |                                                                                                                                                                                                      |
|--------------------------------------------------------------------------------------------------------------------------------------------------------------------------------------|------------------------------------------------------------------------------------------------------------------------------------------------------------------------------------------------------|
| <b>HH00.</b> CLUSTER (EA) NAME.....                                                                                                                                                  | <b>HH01.</b> CLUSTER NUMBER: <input style="width: 20px; height: 20px;" type="text"/> <input style="width: 20px; height: 20px;" type="text"/> <input style="width: 20px; height: 20px;" type="text"/> |
| <b>HH02.</b> HH NUMBER: <input style="width: 20px; height: 20px;" type="text"/> <input style="width: 20px; height: 20px;" type="text"/>                                              | <b>HH03.</b> RESIDENCE (RURAL=1, URBAN=2): <input style="width: 20px; height: 20px;" type="text"/> <input style="width: 20px; height: 20px;" type="text"/>                                           |
| <b>HH04.</b> RESPONDENT LINE NUMBER:<br>(SHOULD BE MOTHER/CAREGIVER) <input style="width: 20px; height: 20px;" type="text"/> <input style="width: 20px; height: 20px;" type="text"/> | <b>HH05</b> CHILD LINE NUMBER <input style="width: 20px; height: 20px;" type="text"/> <input style="width: 20px; height: 20px;" type="text"/>                                                        |
| <b>HH06.</b> INTERVIEWER NAME _____<br>CODE: _____                                                                                                                                   | <b>HH07.</b> TEAM LEADER, NAME: _____<br>CODE: _____                                                                                                                                                 |
| <b>HH08.</b> SUPERVISOR NAME: _____<br>CODE. _____                                                                                                                                   |                                                                                                                                                                                                      |

**PRESCHOOL CHILDREN 6-59 MONTHS OLD****PART I: CHILD HEALTH QUESTIONS**

I would like to ask you some health and food questions about your child. Fill or Circle the correct answer

| S.N | Questions                                                                                                                                                                                                            | Response                                                                                                                                                                              | SKIP |
|-----|----------------------------------------------------------------------------------------------------------------------------------------------------------------------------------------------------------------------|---------------------------------------------------------------------------------------------------------------------------------------------------------------------------------------|------|
| 1   | <p><b>What is the birth date of the child? In day/month/ year (How many months old is this child?)</b></p> <hr/> <p>NOTE FOR INTERVIEWERS<br/>(Screening question to verify that the date of birth of the child)</p> | <p>Birth Date: _____</p> <p>(Day/Month/Year)</p> <p>Age in months <input style="width: 20px; height: 20px;" type="text"/> <input style="width: 20px; height: 20px;" type="text"/></p> |      |
| 2   | <b>Has (child's name) been diagnosed with anemia in the past 6 months?</b>                                                                                                                                           | <p>No.....0</p> <p>Yes .....1</p> <p>Don't know.....98</p>                                                                                                                            |      |

**PART II: CHILD BIOCHEMICAL MEASUREMENT**

|                                                                                                                                                                                                                                                                                                                                                                                                                                                                                            |                                                                                               |
|--------------------------------------------------------------------------------------------------------------------------------------------------------------------------------------------------------------------------------------------------------------------------------------------------------------------------------------------------------------------------------------------------------------------------------------------------------------------------------------------|-----------------------------------------------------------------------------------------------|
| Consent given for: <b>PL01</b> Blood <input type="checkbox"/> <b>PL02</b> Stool <input type="checkbox"/><br>(Y OR N)                                                                                                                                                                                                                                                                                                                                                                       |                                                                                               |
| <b>PL03</b> Code for Laboratory Technician: <input type="text"/> <input type="text"/>                                                                                                                                                                                                                                                                                                                                                                                                      | Lab Tech Name _____                                                                           |
| <b>PL04</b> BLUE TOP TUBE (METAL FREE)<br>Not collected =00.0 Refused = 77.7                                                                                                                                                                                                                                                                                                                                                                                                               | ML. <input type="text"/> <input type="text"/> ● <input type="text"/>                          |
| <b>PL05</b> PURPLE TOP TUBE (EDTA)<br>Not collected =00.0<br>Refused = 77.7                                                                                                                                                                                                                                                                                                                                                                                                                | ML. <input type="text"/> <input type="text"/> ● <input type="text"/>                          |
| <b>PL06</b> RED TOP TUBE (EDTA)<br>Not collected =00.0<br>Refused = 77.7                                                                                                                                                                                                                                                                                                                                                                                                                   | ML. <input type="text"/> <input type="text"/> ● <input type="text"/>                          |
| <b>PL07</b> Date blood sample taken (Ethiopian Day/Month/Year)                                                                                                                                                                                                                                                                                                                                                                                                                             | Date: ____/____/____<br>Day / Month / Year                                                    |
| <b>PL08</b> TIME BLOOD DRAW (Ethiopian time)                                                                                                                                                                                                                                                                                                                                                                                                                                               | Blood draw ____ : ____ Hour Minute                                                            |
| <b>PL09</b> When did you eat your most recent meal (food)?<br>(Ethiopian time)                                                                                                                                                                                                                                                                                                                                                                                                             | ____ : ____<br>Hour Minute                                                                    |
| <b>PL10</b> MALARIA RESULTS (RDK)                                                                                                                                                                                                                                                                                                                                                                                                                                                          | NEGATIVE.....0<br>POSITIVE P FALCIPARUM .....1<br><br>Positive P VIVAX.....2<br>INVALID.....3 |
| <b>PL11</b> FEVER in last 24 HR?                                                                                                                                                                                                                                                                                                                                                                                                                                                           | NO.....0<br>YES .....1                                                                        |
| <b>PL12</b> HEMOGLOBIN RESULTS                                                                                                                                                                                                                                                                                                                                                                                                                                                             | g/dL <input type="text"/> <input type="text"/> ● <input type="text"/>                         |
| <p><b>In order to determine if you have worms in the stool, we would like to collect a stool sample from your child. If you can provide this now, we appreciate it. If not now, we can come back to pick up the sample at a later time.</b></p> <p><i>INSTRUCTIONS IF UNABLE TO PRODUCE AT WILL:</i></p> <p><b>For stool:</b> We will return tomorrow to pick up your stool. We would like the freshest stool you can give us. Please use one cup to collect the first stool you pass.</p> |                                                                                               |
| <b>PL13</b> STOOL COLLECTED?                                                                                                                                                                                                                                                                                                                                                                                                                                                               | NO.....0 YES<br>.....1                                                                        |
| <b>PL14</b> Date stool sample taken (Ethiopian Day/Month/Year)                                                                                                                                                                                                                                                                                                                                                                                                                             | Date: ____/____/____<br>Day / Month / Year                                                    |
| <b>PL15</b> TIME: STOOL COLLECTED (Ethiopian time)                                                                                                                                                                                                                                                                                                                                                                                                                                         | ____ : ____                                                                                   |

|                                                                     |       |         |
|---------------------------------------------------------------------|-------|---------|
|                                                                     | Hour  | Minute  |
| <b>PL16</b> TIME: STOOL PASSED, Ethiopian time (as recorded on cup) | _____ | : _____ |
|                                                                     | Hour  | Minute  |
| <b>PL17</b> Time Blood centrifuged (Ethiopian time)                 | _____ | : _____ |
|                                                                     | Hour  | Minute  |

Thank you for completing this interview.

**INTERVIEWER'S OBSERVATIONS**

**TO BE FILLED IN AFTER COMPLETING INTERVIEW**

**COMMENTS ABOUT RESPONDENT:**

---



---



---



---



---



---



---



---

**SCHOOL AGE CHILDREN 6-12 YEARS  
ETHIOPIAN FOOD AND NUTRITION STRATEGY BASELINE SURVEY 2020/21  
Biochemical and Health Related Data Collection Tool**

| IDENTIFICATION                                                       |                                                                |  |
|----------------------------------------------------------------------|----------------------------------------------------------------|--|
| <b>SG01.</b> CLUSTER NUMBER:                                         | <input type="text"/> <input type="text"/> <input type="text"/> |  |
| <b>SG02.</b> HH NUMBER:                                              | <input type="text"/> <input type="text"/>                      |  |
| <b>SG03.</b> RESPONDENT LINE NUMBER:<br>(SHOULD BE MOTHER/CAREGIVER) | <input type="text"/> <input type="text"/>                      |  |
| <b>SG04</b> SCHOOL CHILD LINE NUMBER                                 | <input type="text"/> <input type="text"/>                      |  |

**In general, for children 6-10 years of age: get parental report (ask the questions of the caretaker and enter the child's name into the parentheses)**

**For children 11-12 years of age who are present and can provide information: get self-report (ask questions directly of the child and enter "you" or "yourself" into the parentheses)**

**PART I: CHILD HEALTH RELATED QUESTIONS**

| No. | QUESTION                                                                                                               | CODING CATEGORIES                                  | SKIP               |
|-----|------------------------------------------------------------------------------------------------------------------------|----------------------------------------------------|--------------------|
| S1  | How old are you/is your child?<br><br><i>(Verify that the age is the same age as written on the household listing)</i> | <input type="text"/> <input type="text"/><br>Years |                    |
| S2  | Have you/ your child ever attended school?                                                                             | No.....<br>Yes .....                               | 00<br>01<br>00 →S4 |
| S3  | What is the highest level of school (name of child) completed?                                                         | None.....0<br>Primary .....1                       |                    |

**PART II: CHILD BIOCHEMICAL MEASUREMENT**

|                                                                               |                                                                                                               |
|-------------------------------------------------------------------------------|---------------------------------------------------------------------------------------------------------------|
| Verbal consent given for: SL01 Blood SL02 Urine SL03 Stool<br>0= No OR 1= yes | <input type="checkbox"/> <input type="checkbox"/> <input type="checkbox"/>                                    |
| SL04 Phlebotomist Code                                                        | <input type="text"/> <input type="text"/>                                                                     |
| SL5 BLUE TOP TUBE (METAL FREE)<br>Did not work =00.0<br>Refused = 77.7        | ML. <input type="text"/> <input type="text"/> <input type="checkbox"/> <input type="text"/>                   |
| SL6 PURPLE TOP TUBE (EDTA)<br>Did not work =00.0<br>Refused = 77.7            | ML. <input type="text"/> <input type="text"/> <input type="checkbox"/> <input type="text"/>                   |
| SL7 REDTOP TUBE (EDTA)<br>Did not work =00.0<br>Refused = 77.7                | ML. <input type="text"/> <input type="text"/> <input type="checkbox"/> <input type="text"/>                   |
| SL8 DATE BLOOD SAMPLE TAKEN (Ethiopian calendar)                              | Date: ____ / ____ / ____<br>Day / Month / Year                                                                |
| SL9 TIME BLOOD DRAW (Ethiopian time)                                          | Blood draw ____ : ____<br>Hour Minute                                                                         |
| SL10 When did you eat your most recent meal (food)?<br>(Ethiopian time)       | Last Meal Eaten ____ : ____<br>Hour Minute                                                                    |
| SL11 FEVER in last 24 HR? (Since same time yesterday)                         | No.....00<br>Yes .....01                                                                                      |
| SL12 MALARIA RESULTS (RDK)                                                    | NEGATIVE.....00<br>POSITIVE P <i>falciparum</i> .....01<br>POSITIVE P <i>vivax</i> .....02<br>INVALID .....03 |

|                                                                                                                                                                                                                                                 |                                                                                          |
|-------------------------------------------------------------------------------------------------------------------------------------------------------------------------------------------------------------------------------------------------|------------------------------------------------------------------------------------------|
| <b>SL13</b> HEMOGLOBIN RESULTS                                                                                                                                                                                                                  | g/dL <input type="text"/> <input type="text"/> <input type="text"/> <input type="text"/> |
| <b>SL14</b> Is that finger prick or venous sample taken?                                                                                                                                                                                        | Finger prick.....00<br>Venous .....01                                                    |
| <b>In order to determine if you have blood in urine or worms in stool we would like to collect a urine and stool sample. If you can provide this now, we appreciate it. If not now, we can come back to pick up the sample at a later time.</b> |                                                                                          |
| <b>SL15</b> Urine collected?                                                                                                                                                                                                                    | No.....00<br>yes .....01                                                                 |
| <b>SL16</b> Blood in urine RESULTS                                                                                                                                                                                                              | Negative.....00<br>positive .....01                                                      |
| <b>SL17</b> Stool collected?                                                                                                                                                                                                                    | No.....00<br>yes.....01                                                                  |
| <b>SL18</b> Date and time when stool passed by the respondent (as recorded on cup) (Ethiopian time)                                                                                                                                             | Date: ___/___/___ and ___ : ___<br>Day / Month /Year Hour Minute                         |
| <b>SL19</b> Date stool sample taken (Ethiopian calendar)                                                                                                                                                                                        | Date: ___/___/___<br>Day / Month / Year                                                  |
| <b>SL20</b> Time when stool collected from the respondent (Ethiopian time)                                                                                                                                                                      | ___ : ___<br>Hour Minute                                                                 |
| <b>SL21</b> TIME BLOOD centrifuged (Ethiopian time)                                                                                                                                                                                             | ___ : ___<br>Hour Minute                                                                 |

Thank the respondent and tell them that the lab team will be arriving later.

**INTERVIEWER'S OBSERVATIONS  
TO BE FILLED IN AFTER COMPLETING INTERVIEW**

**COMMENTS:**

---



---



---



---

**ADELESCENT GIRLS (10-19 YEARS)**  
**ETHIOPIAN FOOD AND NUTRITION STRATEGY BASELINE SURVEY 2020/21**  
**Biochemical and Health Related Data Collection Tool**

| IDENTIFICATION                                                                                                                                                                    |                                                                                                                                                                                                      |
|-----------------------------------------------------------------------------------------------------------------------------------------------------------------------------------|------------------------------------------------------------------------------------------------------------------------------------------------------------------------------------------------------|
| <b>HH00.</b> CLUSTER (EA) NAME.....                                                                                                                                               | <b>HH01.</b> CLUSTER NUMBER: <input style="width: 20px; height: 20px;" type="text"/> <input style="width: 20px; height: 20px;" type="text"/> <input style="width: 20px; height: 20px;" type="text"/> |
| <b>HH02.</b> HH NUMBER: <input style="width: 20px; height: 20px;" type="text"/> <input style="width: 20px; height: 20px;" type="text"/>                                           | <b>HH03.</b> RESIDENCE (RURAL=1, URBAN=2): <input style="width: 20px; height: 20px;" type="text"/> <input style="width: 20px; height: 20px;" type="text"/>                                           |
| <b>HH04.</b> RESPONDENT LINE NUMBER: (SHOULD BE MOTHER/CAREGIVER) <input style="width: 20px; height: 20px;" type="text"/> <input style="width: 20px; height: 20px;" type="text"/> | <b>HH05</b> WOMEN LINE NUMBER <input style="width: 20px; height: 20px;" type="text"/> <input style="width: 20px; height: 20px;" type="text"/>                                                        |
| <b>HH06.</b> INTERVIEWER NAME _____<br>CODE: _____                                                                                                                                | <b>HH07.</b> TEAM LEADER, NAME: _____<br>CODE: _____                                                                                                                                                 |
| <b>HH08.</b> SUPERVISOR NAME: _____<br>CODE: _____                                                                                                                                |                                                                                                                                                                                                      |

**PART I: HEALTH RELATED QUESTIONS**

I would like to ask you some health and food questions about yourself. Fill or Circle the correct answer

| No. | Question                                                                                                 | Coding categories                                             | Skip |
|-----|----------------------------------------------------------------------------------------------------------|---------------------------------------------------------------|------|
| 1   | How old are you?<br><br><i>(verify that the age is the same age as written on the household listing)</i> | <input style="width: 20px; height: 20px;" type="text"/> Years |      |
| 2   | Have you been diagnosed with anemia in the past six months?                                              | No.....0<br>Yes .....1<br>Don't know.....98                   |      |
| 3   | Do you smoke? (do not include the powder and chew type)                                                  | No.....0<br>Yes .....1                                        |      |

**PART II: ADOLESCENT BIOCHEMICAL MEASUREMENT**

|                                                                                                                                                                                                                                                                                                         |
|---------------------------------------------------------------------------------------------------------------------------------------------------------------------------------------------------------------------------------------------------------------------------------------------------------|
| Consent given for: <b>AG01</b> Blood <b>AGL02</b> Stool<br>0= No or 1= Yes <input style="width: 20px; height: 20px;" type="checkbox"/> <input style="width: 20px; height: 20px;" type="checkbox"/>                                                                                                      |
| <b>AG03</b> BLUE TOP TUBE (METAL FREE)<br><b>Did not work =00.0</b> ML. <input style="width: 20px; height: 20px;" type="text"/> |

|                                                                                                                                                                                                                                                                                                                                                                                                                                                                        |                                                                                                                                                                                        |
|------------------------------------------------------------------------------------------------------------------------------------------------------------------------------------------------------------------------------------------------------------------------------------------------------------------------------------------------------------------------------------------------------------------------------------------------------------------------|----------------------------------------------------------------------------------------------------------------------------------------------------------------------------------------|
| <b>Refused = 77.7</b>                                                                                                                                                                                                                                                                                                                                                                                                                                                  |                                                                                                                                                                                        |
| <b>AG04 PURPLE TOP TUBE (EDTA)</b><br><b>Did not work =00.0</b><br><b>Refused = 77.7</b>                                                                                                                                                                                                                                                                                                                                                                               | ML. <input type="text"/> <input type="text"/> <input type="text"/> <input type="text"/>                                                                                                |
| <b>AG05 REDTOP TUBE (EDTA)</b><br><b>Did not work =00.0</b><br><b>Refused = 77.7</b>                                                                                                                                                                                                                                                                                                                                                                                   | ML. <input type="text"/> <input type="text"/> <input type="text"/> <input type="text"/>                                                                                                |
| <b>AG06 Date blood sample taken (Ethiopian calendar)</b>                                                                                                                                                                                                                                                                                                                                                                                                               | Date: ____/____/____<br>Day / Month / Year                                                                                                                                             |
| <b>AG07 TIME BLOOD DRAW (Ethiopian time)</b>                                                                                                                                                                                                                                                                                                                                                                                                                           | Blood draw ____ : ____<br>Hour Minute                                                                                                                                                  |
| <b>AG08 When did you eat your most recent meal (food)?</b><br>(Ethiopian date and time)                                                                                                                                                                                                                                                                                                                                                                                | ____/____/____ ____ : ____<br>Date /Month/ Year Hour Minute                                                                                                                            |
| <b>AG09 Is it Finger prick or venous blood sample taken?</b>                                                                                                                                                                                                                                                                                                                                                                                                           | 01 Finger prick<br>02 Venous                                                                                                                                                           |
| <b>AG09 MALARIA RESULTS (RDT)</b>                                                                                                                                                                                                                                                                                                                                                                                                                                      | NEGATIVE..... 00<br>POSITIVE P <i>falciparum</i> ..... 01<br>POSITIVE P <i>vivax</i> ..... 02<br>POSITIVE FOR BOTH P <i>falciparum</i> and P <i>vivax</i> ..... 03<br>INVALID ..... 04 |
| <b>AG10 HEMOGLOBIN RESULTS</b>                                                                                                                                                                                                                                                                                                                                                                                                                                         | g/dL <input type="text"/> <input type="text"/> <input type="text"/>                                                                                                                    |
| <p><b>In order to determine if you have worms in the stool we would like to collect a stool sample. If you can provide this now, we appreciate it. If not now, we can come back to pick up the sample at a later time.</b></p> <p><i>INSTRUCTIONS IF UNABLE TO PRODUCE AT WILL:</i></p> <p><b>For stool:</b> We will return tomorrow to pick up your stool. We would like the fresh stool you can give us. Please use one cup to collect the first stool you pass.</p> |                                                                                                                                                                                        |
| <b>AG11 Stool collected?</b>                                                                                                                                                                                                                                                                                                                                                                                                                                           | No.....00<br>yes .....01                                                                                                                                                               |
| <b>AG12 Date stool sample taken (Ethiopian calendar)</b>                                                                                                                                                                                                                                                                                                                                                                                                               | Date: ____/____/____<br>Day / Month / Year                                                                                                                                             |
| <b>AG13 Time when stool passed by the respondent (as recorded on cup)</b><br>(Ethiopian time)                                                                                                                                                                                                                                                                                                                                                                          | ____ : ____<br>Hour Minute                                                                                                                                                             |
| <b>AG14 Time when stool collected from the respondent (Ethiopian time)</b>                                                                                                                                                                                                                                                                                                                                                                                             | ____ : ____                                                                                                                                                                            |

|                                                     |       |        |
|-----------------------------------------------------|-------|--------|
|                                                     | Hour  | Minute |
| <b>AG15</b> TIME BLOOD centrifuged (Ethiopian time) | _____ | _____  |
|                                                     | Hour  | Minute |

**OBSERVATIONS**  
**TO BE FILLED IN AFTER COMPLETING INTERVIEW**

**COMMENTS:**


---



---



---

**WOMEN OF REPRODUCTIVE AGE 15-49 YEAR OLDS**  
**ETHIOPIAN FOOD AND NUTRITION STRATEGY BASELINE SURVEY 2020/21**  
**Biochemical and Health Related Data Collection Tool**

| IDENTIFICATION                                                                                              |                                                                                             |
|-------------------------------------------------------------------------------------------------------------|---------------------------------------------------------------------------------------------|
| <b>HH00.</b> CLUSTER (EA) NAME.....                                                                         | <b>HH01.</b> CLUSTER NUMBER: <input type="text"/> <input type="text"/> <input type="text"/> |
| <b>HH02.</b> HH NUMBER: <input type="text"/> <input type="text"/>                                           | <b>HH03.</b> RESIDENCE (RURAL=1, URBAN=2): <input type="text"/> <input type="text"/>        |
| <b>HH04.</b> RESPONDENT LINE NUMBER: (SHOULD BE MOTHER/CAREGIVER) <input type="text"/> <input type="text"/> | <b>HH05</b> WOMEN LINE NUMBER <input type="text"/> <input type="text"/>                     |
| <b>HH06.</b> INTERVIEWER NAME _____<br>CODE: _____                                                          | <b>HH07.</b> TEAM LEADER, NAME: _____<br>CODE: _____                                        |
| <b>HH08.</b> SUPERVISOR NAME: _____<br>CODE. _____                                                          |                                                                                             |

**PART I: HEALTH RELATED QUESTIONS**

| S.N                                                                                                         | QUESTION                                                                                                 | Response                                           | SKIP |
|-------------------------------------------------------------------------------------------------------------|----------------------------------------------------------------------------------------------------------|----------------------------------------------------|------|
| 1                                                                                                           | How old are you?<br><br><i>(verify that the age is the same age as written on the household listing)</i> | <input type="text"/> <input type="text"/><br>Years |      |
| Now I would like to ask you some questions about your health. I will first ask you about the last 6 months. |                                                                                                          |                                                    |      |
| 2                                                                                                           | Have you been diagnosed with anemia in the past six months?                                              | No.....0                                           |      |



|   |                                                                                                                                                            |                                             |  |
|---|------------------------------------------------------------------------------------------------------------------------------------------------------------|---------------------------------------------|--|
|   |                                                                                                                                                            | Yes .....1<br>Don't know.....98             |  |
| 2 | Have you been ill with malaria in the past 2 weeks?                                                                                                        | No.....0<br>Yes .....1<br>Don't know.....98 |  |
| 3 | Do you smoke? (do not include the powder and chew type)                                                                                                    | No.....0<br>Yes .....1                      |  |
| 4 | Are you currently lactating?                                                                                                                               | No.....0<br>Yes .....1                      |  |
| 5 | During that last pregnancy (that resulted in a live birth) did you have difficulty with your vision at night ("Dafent" night blindness in local language)? | No.....0<br>Yes .....1<br>Don't know.....98 |  |
| 6 | In the first two months after delivery, did you receive a vitamin A dose (like this)<br><br><i>SHOW THE CAPSULE</i>                                        | No.....0<br>Yes .....1<br>Don't know.....98 |  |

**PART II: WOMEN BIOCHEMICAL MEASUREMENT**

|                                                                                                                       |                                                                                                                                                     |
|-----------------------------------------------------------------------------------------------------------------------|-----------------------------------------------------------------------------------------------------------------------------------------------------|
| <b>If the women is pregnant do not collect venous blood</b>                                                           |                                                                                                                                                     |
| Consent given for:                                                                                                    | <b>WL01</b> Blood <b>WL02</b> Urine <b>WL03</b> Stool<br>0= No or 1= Yes <input type="checkbox"/> <input type="checkbox"/> <input type="checkbox"/> |
| <b>WL4</b> BLUE TOP TUBE (METAL FREE)<br><b>Did not work =00.0</b><br><b>Refused = 77.7</b><br><b>Pregnant = 99.9</b> | ML. <input type="text"/> <input type="text"/> <input type="text"/> <input type="text"/> <input type="text"/>                                        |
| <b>WL5</b> PURPLE TOP TUBE (EDTA)<br><b>Did not work =00.0</b><br><b>Refused = 77.7</b><br><b>Pregnant = 99.9</b>     | ML. <input type="text"/> <input type="text"/> <input type="text"/> <input type="text"/> <input type="text"/>                                        |
| <b>WL6</b> REDTOP TUBE (EDTA)<br><b>Did not work =00.0</b><br><b>Refused = 77.7</b><br><b>Pregnant = 99.9</b>         | ML. <input type="text"/> <input type="text"/> <input type="text"/> <input type="text"/> <input type="text"/>                                        |
| <b>WL7</b> Date blood sample taken (Ethiopian calendar)                                                               | Date: ____/____/____                                                                                                                                |

|                                                                                                                                                                                                                                                                                                                                                                                                                                                                                                                                                                                |                                                                                                                                                                                              |
|--------------------------------------------------------------------------------------------------------------------------------------------------------------------------------------------------------------------------------------------------------------------------------------------------------------------------------------------------------------------------------------------------------------------------------------------------------------------------------------------------------------------------------------------------------------------------------|----------------------------------------------------------------------------------------------------------------------------------------------------------------------------------------------|
|                                                                                                                                                                                                                                                                                                                                                                                                                                                                                                                                                                                | Day / Month / Year                                                                                                                                                                           |
| <b>WL8</b> TIME BLOOD DRAW (Ethiopian time)                                                                                                                                                                                                                                                                                                                                                                                                                                                                                                                                    | Blood draw ____ : ____<br>Hour Minute                                                                                                                                                        |
| <b>WL9</b> When did you eat your most recent meal (food)?<br>(Ethiopian date and time)                                                                                                                                                                                                                                                                                                                                                                                                                                                                                         | ____ / ____ / ____ : ____<br>Date /Month/ Year Hour Minute                                                                                                                                   |
| <b>WL 10</b> Finger prick or venous sample taken?                                                                                                                                                                                                                                                                                                                                                                                                                                                                                                                              | 01 Finger prick<br>02 Venous                                                                                                                                                                 |
| <b>WL11</b> MALARIA RESULTS (RDT)                                                                                                                                                                                                                                                                                                                                                                                                                                                                                                                                              | NEGATIVE..... 00<br>POSITIVE P <i>falciparum</i> ..... 01<br>POSITIVE P <i>vivax</i> ..... 02<br>POSITIVE FOR BOTH P <i>falciparum</i> and P <i>vivax</i> .....<br>03<br>INVALID .....<br>04 |
| <b>WL12</b> HEMOGLOBIN RESULTS                                                                                                                                                                                                                                                                                                                                                                                                                                                                                                                                                 | g/dL <input type="text"/> <input type="text"/> <input type="text"/>                                                                                                                          |
| <p><b>In order to determine if you have blood in the urine or worms in the stool we would like to collect a urine and stool sample. If you can provide this now, we appreciate it. If not now, we can come back to pick up the sample at a later time.</b></p> <p><i>INSTRUCTIONS IF UNABLE TO PRODUCE AT WILL:</i></p> <p><b>For stool:</b> We will return tomorrow to pick up your stool. We would like the fresh stool you can give us. Please use one cup to collect the first stool you pass.</p> <p><b>For urine:</b> We will return tomorrow to pick up your urine.</p> |                                                                                                                                                                                              |
| <b>WL13</b> Urine collected?                                                                                                                                                                                                                                                                                                                                                                                                                                                                                                                                                   | No.....0<br>0 yes .....01                                                                                                                                                                    |
| <b>WL14</b> RESULTS (blood in urine)<br><b>Ask the women if she is Menstruating</b><br>(Don't test if the women is in Menstruation)                                                                                                                                                                                                                                                                                                                                                                                                                                            | Negative.....00<br>positive .....01<br>Women is Menstruating.....03                                                                                                                          |
| <b>WL15</b> Stool collected?                                                                                                                                                                                                                                                                                                                                                                                                                                                                                                                                                   | No.....00<br>yes .....01                                                                                                                                                                     |
| <b>WL16</b> Date stool sample taken (Ethiopian calendar)                                                                                                                                                                                                                                                                                                                                                                                                                                                                                                                       | Date: ____ / ____ / ____<br>Day / Month / Year                                                                                                                                               |
| <b>WL17</b> Time when stool passed by the respondent (as recorded on cup) (Ethiopian time)                                                                                                                                                                                                                                                                                                                                                                                                                                                                                     | ____ : ____<br>Hour Minute                                                                                                                                                                   |
| <b>WL18</b> Time when stool collected from the respondent (Ethiopian time)                                                                                                                                                                                                                                                                                                                                                                                                                                                                                                     | ____ : ____                                                                                                                                                                                  |

|                                              | Hour    | Minute  |
|----------------------------------------------|---------|---------|
| WL19 TIME BLOOD centrifuged (Ethiopian time) | __ : __ | __ : __ |

**OBSERVATIONS**  
**TO BE FILLED IN AFTER COMPLETING INTERVIEW**

**COMMENTS:**

---

---

---

---

---
