# Supplementary material for: Ethiopia National Food and Nutrition Survey to inform the Ethiopian National Food and Nutrition Strategy: a study protocol
Source: PubMed Central journal article supplement (PMC10151871; doi:10.1136/bmjopen-2022-067641), 2023-04-25
Supplement: bmjopen-2022-067641supp014.pdf [file bmjopen-2022-067641supp014.pdf]

**Table 1S.** Key indicators used to estimate sample size for each target group

| Target Group                                | Key indicators used to estimate sample size                                                                                                                                                                                                                                                                                            |
|---------------------------------------------|----------------------------------------------------------------------------------------------------------------------------------------------------------------------------------------------------------------------------------------------------------------------------------------------------------------------------------------|
| Children under 5 years of age (0-59 months) | Vitamin A deficiency<br>Total goiter prevalence<br>Stunting<br>Any anemia<br>Zinc deficiency<br>Prevalence of inadequate intake of zinc                                                                                                                                                                                                |
| Women of reproductive age (15-49 years)     | Vitamin A deficiency<br>Total goiter prevalence<br>Any anemia<br>Zinc deficiency<br>RBC folate deficiency<br>Serum folate deficiency<br>Vitamin B <sub>12</sub> deficiency<br>Iodized salt coverage<br>Prevalence of inadequate intake of iron<br>Prevalence of inadequate intake of zinc<br>Prevalence of inadequate intake vitamin A |
| School age children (6 to 12 years)         | Vitamin A deficiency<br>Total goiter prevalence<br>Any anemia<br>Iodine deficiency<br>Zinc deficiency                                                                                                                                                                                                                                  |
| Adolescent girls (10 to 19 years)           | Any anemia                                                                                                                                                                                                                                                                                                                             |
