# Supplementary material for: Ethiopia National Food and Nutrition Survey to inform the Ethiopian National Food and Nutrition Strategy: a study protocol
Source: PubMed Central journal article supplement (PMC10151871; doi:10.1136/bmjopen-2022-067641), 2023-04-25
Supplement: bmjopen-2022-067641supp015.pdf [file bmjopen-2022-067641supp015.pdf]

**Table 2S.** Sample size determination and allocation

| Region                   | Indicator used to estimate sample size | Number of EA | Number of HH  | Expected number pre-school children (0-59 months) | Expected number of WRA (15-49 years) | Expected number school age children (6-12 years) | Expected number of adolescent girls (10-19 years) | Total population (2019 year projection) |
|--------------------------|----------------------------------------|--------------|---------------|---------------------------------------------------|--------------------------------------|--------------------------------------------------|---------------------------------------------------|-----------------------------------------|
| Tigray                   | Any anemia                             | 55           | 1,432         | 590                                               | 1,236                                | 753                                              | 516                                               | 5,443,095                               |
| Afar                     | Stunting                               | 51           | 1,328         | 539                                               | 1,096                                | 695                                              | 406                                               | 1,901,863                               |
| Amhara                   | Stunting                               | 61           | 1,585         | 619                                               | 1,253                                | 843                                              | 531                                               | 21,842,548                              |
| Oromia                   | IDD                                    | 62           | 1,622         | 891                                               | 1,539                                | 1,111                                            | 739                                               | 37,267,225                              |
| Somali                   | IDD                                    | 55           | 1,424         | 855                                               | 1,268                                | 1,000                                            | 492                                               | 6,050,851                               |
| Benishangul-Gumuz        | Stunting                               | 49           | 1,282         | 555                                               | 1,127                                | 732                                              | 475                                               | 1,126,656                               |
| SNNPR                    | Any anemia                             | 59           | 1,528         | 818                                               | 1,492                                | 1,000                                            | 692                                               | 15,763,484                              |
| Gambela                  | Any anemia                             | 47           | 1,211         | 428                                               | 1,018                                | 568                                              | 373                                               | 463,203                                 |
| Harari                   | Any anemia                             | 45           | 1,164         | 375                                               | 978                                  | 499                                              | 348                                               | 257,362                                 |
| Addis Ababa              | IDD/ TGR                               | 54           | 1,411         | 413                                               | 1,274                                | 405                                              | 262                                               | 3,685,684                               |
| Dire Dawa                | Stunting                               | 47           | 1,215         | 382                                               | 1,128                                | 480                                              | 360                                               | 492,819                                 |
| Sidama                   | Any anemia                             | 54           | 1,395         | 747                                               | 1,363                                | 914                                              | 632                                               | 4,322,685                               |
| <b>Total sample size</b> |                                        | <b>639</b>   | <b>16,596</b> | <b>7,213</b>                                      | <b>14,772</b>                        | <b>9,001</b>                                     | <b>5,824</b>                                      | <b>98,617,475</b>                       |
